# Supplementary material for: A Network of MicroRNAs and mRNAs Involved in Melanosome Maturation and Trafficking Defines the Lower Response of Pigmentable Melanoma Cells to Targeted Therapy
Source: Cancers (Basel). 2023 Jan 31;15(3):894. doi: 10.3390/cancers15030894 (PMC9913661; doi:10.3390/cancers15030894)
Supplement: Supplementary file 1 [file cancers-15-00894-s001.zip]

Archive with 10 entries (10 files):
- Supplementary Material 311022.pdf
- Supplementary Table S1-List of DE miRNAs in A375 (n=232), 501Mel (n=72) and SK-Mel-5 (n=61) cells upon 48h of treatment with 2uM vem.xlsx
- Supplementary Table S2-List of 5689 DE RNAs in 501Mel cells upon 48h of treatment with 2uM vem.xlsx
- Supplementary Table S3-List of 4354 DE RNAs in SK-Mel-5 cells upon 48h of treatment with 2uM vem.xlsx
- Supplementary Table S4-List of 6408 DE RNAs in A375 cells upon 48h of treatment with 1uM vem (GSE89129).xlsx
- Supplementary Table S5-List of the 26 DE RNAs excluded from further analyses because they are not present in the HGNC database.xlsx
- Supplementary Table S6-List of the 1275 DEmRNAs.xlsx
- Supplementary Table S7-List of the 1430 enriched BPs according to clusterProfiler.xlsx
- Supplementary Table S8-List of 501Mel and SK-Mel-5 genes belonging to modules #1,2,3.xlsx
- Supplementary-figures.pdf
