# Supplementary material for: A Network of MicroRNAs and mRNAs Involved in Melanosome Maturation and Trafficking Defines the Lower Response of Pigmentable Melanoma Cells to Targeted Therapy
Source: Cancers (Basel). 2023 Jan 31;15(3):894. doi: 10.3390/cancers15030894 (PMC9913661; doi:10.3390/cancers15030894)
Supplement: Supplementary file 1 [file cancers-15-00894-s001.zip › Supplementary Material 311022.pdf]

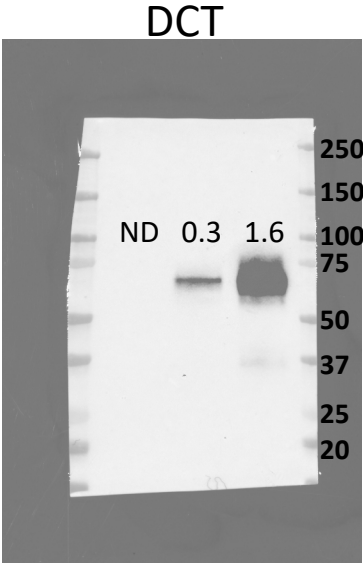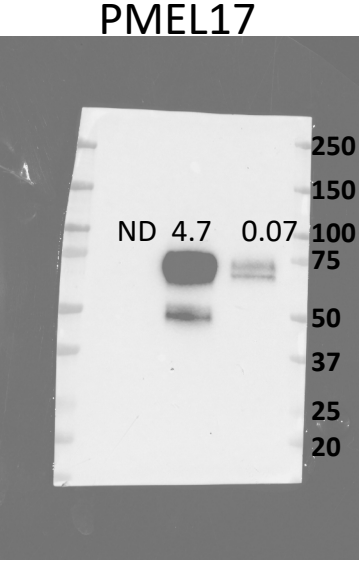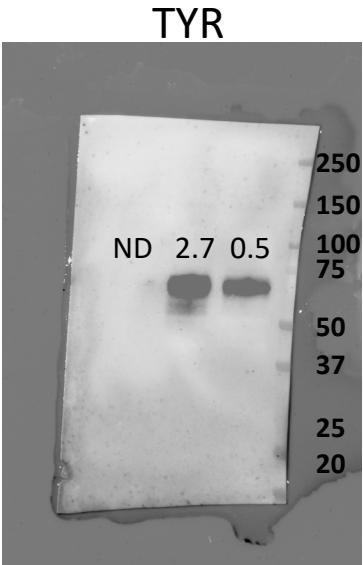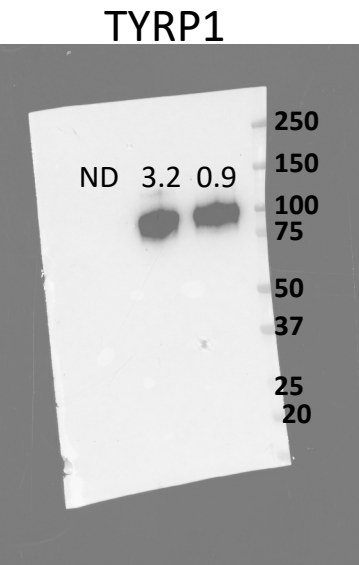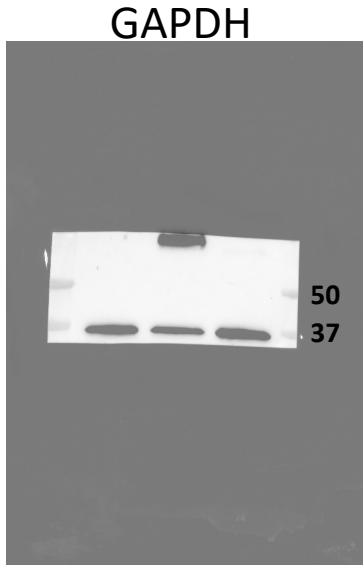

**Supplementary Material. Whole blots and densitometry readings of the western blot presented in Fig.1c.**  
The whole blot and the densitometry readings are reported for each protein detected. Marker size is reported on the right. ND: not detected.
