# Supplementary material for: A Network of MicroRNAs and mRNAs Involved in Melanosome Maturation and Trafficking Defines the Lower Response of Pigmentable Melanoma Cells to Targeted Therapy
Source: Cancers (Basel). 2023 Jan 31;15(3):894. doi: 10.3390/cancers15030894 (PMC9913661; doi:10.3390/cancers15030894)
Supplement: Supplementary file 1 [file cancers-15-00894-s001.zip › Supplementary Table S1-List of DE miRNAs in A375 (n=232), 501Mel (n=72) and SK-Mel-5 (n=61) cells upon 48h of treatment with 2uM vem.xlsx]

## Sheet: A375
miRNA	baseMean	log2FoldChange	pval	padj
hsa-miR-129-1-3p	128.589	7.79347	1.2e-36	4.13e-35
hsa-miR-4532	39.9057	7.39215	3.40703e-12	4.3757e-11
hsa-miR-7704	1303.15	5.21533	2.48e-167	3.25e-164
hsa-miR-129-5p	694.344	4.60983	7.77e-97	1.312e-94
hsa-miR-874-3p	996.715	3.43975	1.45e-87	1.73e-85
hsa-miR-513b-5p	69.4514	3.29359	2.94021e-14	4.37691e-13
hsa-miR-4485	324.677	3.24263	1.71e-37	6.21e-36
hsa-miR-1269a	1506.35	3.20205	1.18e-99	3.09e-97
hsa-miR-653-5p	39.4549	3.10443	2.87933e-06	2.16777e-05
hsa-miR-4792	1212	3.03248	1.09e-72	8.38e-71
hsa-miR-514a-5p	91.6433	3.01184	4.29812e-15	6.82443e-14
hsa-miR-204-5p	63616.3	3.00927	9.92e-162	6.5e-159
hsa-miR-508-3p	1021.29	2.96122	1.11e-85	1.12e-83
hsa-miR-6087	50.6343	2.92689	1.70797e-06	1.30845e-05
hsa-miR-34c-5p	188.656	2.90515	7.04025e-23	1.53712e-21
hsa-miR-375	47.5803	2.89215	8.40115e-08	7.75035e-07
hsa-miR-513c-5p	107.467	2.88873	7.46904e-17	1.34033e-15
hsa-miR-514a-3p	873.218	2.87432	8e-74	6.55e-72
hsa-miR-874-5p	77.1064	2.86693	3.91158e-10	4.37963e-09
hsa-miR-509-3-5p	185.381	2.75877	3.04732e-24	7.12854e-23
hsa-miR-7641	55.424	2.74051	1.17491e-06	9.21635e-06
hsa-miR-891a-5p	62.8415	2.65102	1.18251e-07	1.06834e-06
hsa-miR-509-5p	228.68	2.64149	1.74e-27	4.48e-26
hsa-miR-509-3p	2361.6	2.60237	9.77e-94	1.42e-91
hsa-miR-508-5p	110.46	2.5929	5.80642e-16	9.39063e-15
hsa-miR-125b-2-3p	6313.02	2.5033	6.87e-99	1.5e-96
hsa-miR-506-3p	125.798	2.48518	2.44847e-14	3.68677e-13
hsa-miR-542-3p	500.624	2.26402	1.17e-31	3.48e-30
hsa-miR-424-5p	2528.46	2.25058	1.9e-68	1.38e-66
hsa-let-7c-5p	6274.03	2.22252	5.73e-80	5.37e-78
hsa-miR-181a-2-3p	9387.52	2.21614	6.56e-87	7.16e-85
hsa-miR-328-3p	795.271	2.19885	7.88e-40	3.23e-38
hsa-miR-542-5p	77.2407	2.19092	2.62144e-07	2.29334e-06
hsa-miR-214-3p	34.8798	2.15834	0.00221237	0.0118779
hsa-miR-450b-5p	2000.84	2.14681	6.29e-57	3.75e-55
hsa-miR-190a-5p	1449.41	2.02314	1.33e-44	6.01e-43
hsa-miR-450a-5p	886.659	1.98793	8.155e-35	2.695e-33
hsa-miR-204-3p	51.1748	1.88927	0.000243989	0.00152203
hsa-miR-152-5p	609.969	1.85679	1.15e-28	3.08e-27
hsa-miR-99a-3p	92.3357	1.72994	4.57593e-05	0.000312212
hsa-miR-199a-5p	157.987	1.71377	1.94232e-07	1.72842e-06
hsa-miR-138-1-3p	336.33	1.57235	4.27065e-12	5.4316e-11
hsa-miR-592	1991.26	1.54338	4e-34	1.25e-32
hsa-miR-503-5p	226.13	1.54059	4.34536e-10	4.74368e-09
hsa-miR-143-3p	3145.32	1.49408	2.93e-34	9.37e-33
hsa-miR-9-5p	23344.8	1.49195	1.69667e-45	7.97e-44
hsa-miR-99a-5p	3513.54	1.46332	8.84e-33	2.69e-31
hsa-miR-191-5p	933172	1.40886	4.19e-42	1.83e-40
hsa-miR-3613-5p	174.715	1.4063	9.88585e-07	7.84877e-06
hsa-miR-181a-3p	23812.4	1.35278	9.77e-38	3.66e-36
hsa-miR-152-3p	2674.67	1.32134	2.72e-27	6.85e-26
hsa-miR-338-3p	343.194	1.31083	5.05528e-12	6.30706e-11
hsa-miR-664a-5p	50.5259	1.3034	0.00580651	0.0278262
hsa-miR-10b-5p	340223	1.29046	1.14e-36	4.03e-35
hsa-miR-34a-5p	8361.4	1.22013	1.14e-29	3.18e-28
hsa-miR-338-5p	115.754	1.20645	0.000119745	0.000784331
hsa-miR-769-5p	12171.2	1.20368	5.71e-30	1.63e-28
hsa-miR-21-5p	844879	1.19044	2.25e-31	6.56e-30
hsa-miR-181c-3p	1529.01	1.18054	1.47166e-18	2.79403e-17
hsa-miR-3687	57.3589	1.17428	0.00455268	0.0225351
hsa-miR-551b-3p	276.726	1.08484	6.05632e-07	4.9898e-06
hsa-miR-664a-3p	265.974	1.08115	1.06966e-06	8.44133e-06
hsa-miR-424-3p	1926.09	1.07829	2.68776e-17	4.89024e-16
hsa-miR-181a-5p	412413	1.07725	1.7e-26	4.12e-25
hsa-miR-210-3p	796.968	1.06745	1.84375e-11	2.2786e-10
hsa-miR-140-5p	10020.7	1.06175	9.27173e-23	1.99114e-21
hsa-miR-425-3p	2712.75	1.05905	1.08629e-18	2.09271e-17
hsa-miR-429	85.0887	1.04253	0.00441165	0.0220582
hsa-miR-195-5p	293.15	1.00784	8.93394e-06	6.43047e-05
hsa-miR-138-5p	12040.9	0.993759	1.18453e-20	2.39191e-19
hsa-miR-9-3p	478.557	0.977702	2.4419e-07	2.12727e-06
hsa-miR-200b-3p	558.606	0.974099	2.51102e-08	2.41871e-07
hsa-miR-374b-5p	689.157	0.973571	2.66963e-09	2.77557e-08
hsa-miR-22-5p	579.285	0.96208	8.01278e-09	8.20058e-08
hsa-miR-425-5p	19422	0.95622	8.02493e-20	1.59283e-18
hsa-miR-455-3p	2417.48	0.950466	1.48138e-13	2.08667e-12
hsa-miR-3909	143.484	0.941672	0.00138781	0.00787028
hsa-miR-191-3p	527.409	0.930175	2.32342e-08	2.2714e-07
hsa-miR-212-5p	103.183	0.917911	0.0105109	0.0469941
hsa-miR-149-5p	2291.28	0.897498	2.72115e-13	3.75232e-12
hsa-miR-361-5p	4068.56	0.89695	4.66182e-15	7.27023e-14
hsa-let-7e-5p	43780	0.887258	1.75489e-18	3.28415e-17
hsa-miR-10b-3p	165.392	0.839025	0.00196209	0.0107098
hsa-miR-215-5p	542.14	0.824781	1.48929e-06	1.15442e-05
hsa-miR-22-3p	585615	0.820631	5.60653e-16	9.29691e-15
hsa-miR-181b-5p	80231.6	0.741157	5.70649e-13	7.54216e-12
hsa-miR-26a-5p	264710	0.756689	8.10985e-14	1.18422e-12
hsa-miR-561-5p	7081.46	0.744592	4.32563e-12	5.44863e-11
hsa-let-7b-5p	18998.7	0.739484	6.14827e-13	8.38983e-12
hsa-miR-767-5p	6300.51	0.704501	4.38488e-11	5.2699e-10
hsa-miR-132-3p	1161.16	0.691968	8.21176e-07	6.59964e-06
hsa-miR-193b-3p	3540.14	0.690621	1.27378e-09	1.34568e-08
hsa-miR-20b-5p	254.089	0.688732	0.00775855	0.0359141
hsa-miR-140-3p	140926	0.666163	4.75032e-11	5.65719e-10
hsa-miR-125a-5p	143234	0.632541	4.98135e-10	5.34882e-09
hsa-miR-28-3p	29316.5	0.619655	2.10624e-09	2.20734e-08
hsa-let-7e-3p	314.653	0.616119	0.0034655	0.0174736
hsa-miR-148b-3p	24572.7	0.590493	9.17223e-09	9.24278e-08
hsa-miR-363-3p	1032.46	0.583641	0.000280717	0.00173462
hsa-miR-148a-3p	86815.5	0.571038	1.50071e-08	1.47814e-07
hsa-miR-98-3p	346.945	0.548729	0.00302614	0.0154853
hsa-miR-10a-5p	444482	0.547408	4.24334e-08	3.97055e-07
hsa-miR-497-5p	408.759	0.538482	0.00459507	0.0226299
hsa-miR-26b-5p	20837.1	0.529276	2.70279e-07	2.34481e-06
hsa-miR-30e-3p	8063.5	0.529257	8.10753e-07	6.55609e-06
hsa-miR-182-5p	117407	0.527776	1.11516e-07	1.01449e-06
hsa-miR-29a-3p	35707.1	0.527039	2.95214e-07	2.52765e-06
hsa-miR-935	370.573	0.525328	0.0068664	0.0323561
hsa-miR-301a-3p	12590.9	0.520979	4.48592e-07	3.76703e-06
hsa-miR-3615	964.263	0.493077	0.000638575	0.00383731
hsa-miR-194-5p	1834.77	0.434844	0.000820068	0.00464497
hsa-miR-28-5p	2884.06	0.483537	2.49036e-05	0.00017353
hsa-miR-24-3p	17229.2	0.478387	3.63379e-06	2.67778e-05
hsa-miR-98-5p	31752.3	0.477599	1.41514e-06	1.10347e-05
hsa-miR-105-5p	1923.87	0.472922	0.000165619	0.00105835
hsa-miR-582-3p	1213.31	0.472837	0.000469275	0.0028593
hsa-let-7i-5p	72422.6	0.46061	5.12349e-06	3.72876e-05
hsa-miR-4677-3p	802.239	0.459364	0.00211638	0.0114564
hsa-miR-15a-5p	7588.3	0.448556	2.51699e-05	0.000174458
hsa-miR-30e-5p	120268	0.44799	7.97765e-06	5.77388e-05
hsa-let-7f-5p	147750	0.432526	1.08123e-05	7.69445e-05
hsa-miR-181c-5p	8408.58	0.420478	6.91955e-05	0.000464852
hsa-miR-340-5p	6711.84	0.41631	7.77483e-05	0.000519644
hsa-miR-15b-5p	6361.91	-0.408638	0.000245619	0.00152493
hsa-miR-20a-5p	35513.9	-0.415301	5.4401e-05	0.000367347
hsa-miR-671-5p	1280.33	-0.441054	0.000918446	0.00541966
hsa-miR-652-3p	802.598	-0.444062	0.00370178	0.0185798
hsa-miR-3194-5p	487.316	-0.444321	0.00859465	0.0393671
hsa-miR-873-3p	568.49	-0.491713	0.00323878	0.016509
hsa-miR-320b	873.48	-0.53235	0.000299524	0.00184794
hsa-miR-92a-3p	786770	-0.603739	1.61851e-07	1.37679e-06
hsa-miR-128-3p	10413.1	-0.530517	3.76915e-07	3.1006e-06
hsa-miR-130b-5p	1388.8	-0.528085	5.03287e-05	0.000341609
hsa-miR-18a-5p	4172.25	-0.528357	2.2432e-06	1.69861e-05
hsa-miR-1307-3p	12140.3	-0.568522	3.08317e-08	2.90572e-07
hsa-miR-378a-3p	38784.6	-0.584125	2.50583e-08	2.41871e-07
hsa-miR-16-2-3p	3029.84	-0.586903	3.89362e-07	3.29074e-06
hsa-miR-1268b	1526.37	-0.626672	6.63103e-07	5.42916e-06
hsa-miR-17-5p	29272.4	-0.632918	4.10826e-10	4.52254e-09
hsa-miR-589-3p	566.672	-0.633672	0.000118343	0.000779045
hsa-miR-199a-3p	17449.8	-0.645078	4.18026e-10	4.58036e-09
hsa-miR-33a-5p	323.822	-0.649881	0.00183256	0.0100868
hsa-miR-4746-5p	228.426	-0.654987	0.00520342	0.0252462
hsa-miR-146a-5p	18430.4	-0.657971	8.54214e-11	1.00813e-09
hsa-miR-1268a	1387.77	-0.661359	2.62596e-07	2.29334e-06
hsa-miR-135b-3p	317.421	-0.665477	0.00107172	0.0062122
hsa-miR-30b-3p	323.942	-0.671892	0.000975101	0.00572817
hsa-miR-100-5p	1.32165e+06	-0.710445	7.55432e-13	1.02022e-11
hsa-miR-3176	596.209	-0.711535	1.10005e-05	7.83191e-05
hsa-miR-23a-5p	1554.27	-0.712635	3.01951e-08	2.88727e-07
hsa-miR-130b-3p	7499.59	-0.713559	2.49053e-11	3.02092e-10
hsa-miR-548h-5p	206.126	-0.738126	0.00200029	0.010746
hsa-miR-15b-3p	2425.53	-0.740693	5.96799e-10	6.35615e-09
hsa-miR-550a-5p	170.356	-0.746853	0.00341509	0.0173402
hsa-miR-331-5p	188.32	-0.7731	0.00152257	0.00848751
hsa-miR-504-5p	174.465	-0.777534	0.00532781	0.0257544
hsa-miR-1254	120.255	-0.802574	0.010002	0.0449286
hsa-miR-32-3p	410.637	-0.805366	1.71085e-05	0.000120496
hsa-miR-548x-5p	138.884	-0.810573	0.00504324	0.02456
hsa-miR-221-3p	122128	-0.810933	5.72832e-16	9.38012e-15
hsa-miR-548g-5p	134.368	-0.812982	0.00582013	0.0278262
hsa-miR-2467-5p	240.656	-0.826885	0.000190086	0.00120296
hsa-miR-548aj-5p	133.741	-0.831671	0.00480409	0.0234827
hsa-miR-550a-3p	151.079	-0.839792	0.00218097	0.0117575
hsa-miR-29b-3p	1270.93	-0.850796	1.10983e-10	1.29138e-09
hsa-miR-221-5p	8671.54	-0.886476	8.44853e-17	1.49562e-15
hsa-miR-193a-3p	1269.29	-0.8912	2.19308e-11	2.68498e-10
hsa-miR-449c-5p	206.387	-0.907874	0.000145483	0.000938831
hsa-miR-548ar-5p	90.1803	-0.920807	0.00971407	0.0438808
hsa-miR-101-5p	149.237	-0.928026	0.000799532	0.00476085
hsa-miR-33b-5p	2639.11	-0.931433	5.31522e-15	8.19169e-14
hsa-miR-3180-5p	790.356	-0.939202	1.45978e-10	1.67747e-09
hsa-miR-222-3p	123241	-0.951263	2.27452e-21	4.72957e-20
hsa-miR-17-3p	6149.67	-0.956701	9.26736e-19	1.81198e-17
hsa-miR-615-5p	88.9464	-0.965662	0.00892368	0.0407318
hsa-miR-320c	212.931	-1.0739	1.3155e-05	9.28359e-05
hsa-miR-5094	142.998	-0.979075	0.00124732	0.00713531
hsa-miR-877-5p	1374.96	-0.995173	1.23288e-13	1.75552e-12
hsa-miR-652-5p	110.661	-1.0057	0.00166134	0.00918294
hsa-miR-320d	83.0497	-1.02489	0.00680673	0.0321058
hsa-miR-301a-5p	121.413	-1.06451	0.00065317	0.00390709
hsa-miR-20a-3p	235.182	-1.0836	2.01285e-06	1.53304e-05
hsa-miR-30d-3p	5015.82	-1.09274	2.05939e-23	4.57254e-22
hsa-miR-7-1-3p	493.607	-1.1086	2.91187e-10	3.28841e-09
hsa-miR-1260b	1498.1	-1.11915	7.31402e-18	1.34949e-16
hsa-miR-3605-5p	346.978	-1.12427	3.06726e-08	2.90572e-07
hsa-miR-3180-3p	2928.34	-1.18074	5.22e-25	1.24334e-23
hsa-miR-410-3p	209.107	-1.18378	5.1336e-07	4.25634e-06
hsa-miR-636	65.2783	-1.18879	0.00299359	0.0153788
hsa-miR-654-3p	97.7773	-1.18922	0.000148891	0.000956115
hsa-miR-4521	292.386	-1.20553	1.35406e-08	1.3438e-07
hsa-miR-3677-3p	229.724	-1.21258	4.8389e-07	4.03755e-06
hsa-miR-3180	1976.53	-1.21767	8.57194e-24	1.97004e-22
hsa-miR-708-3p	162.557	-1.22072	0.000133968	0.000868804
hsa-miR-27b-5p	3690.05	-1.23884	5.06e-28	1.33e-26
hsa-miR-449b-5p	62.8773	-1.27021	0.00225098	0.0120358
hsa-miR-6840-5p	49.9158	-1.27107	0.00760557	0.0353308
hsa-miR-195-3p	68.4757	-1.27602	0.00203647	0.0110696
hsa-miR-584-3p	73.2265	-1.28879	0.00106543	0.00620319
hsa-miR-128-1-5p	587.447	-1.32869	2.10586e-16	3.67823e-15
hsa-miR-584-5p	18289.3	-1.34242	2.23e-39	8.86e-38
hsa-miR-3605-3p	411.254	-1.3496	9.90925e-13	1.31122e-11
hsa-miR-27a-5p	2318.26	-1.35936	3.37e-29	9.2e-28
hsa-miR-625-3p	251.869	-1.36484	1.68804e-10	1.9229e-09
hsa-miR-18a-3p	997.666	-1.39242	1.18096e-21	2.49525e-20
hsa-let-7a-2-3p	501.569	-1.41962	5.09203e-16	8.552e-15
hsa-miR-1910-5p	41.7876	-1.44962	0.00786598	0.0362832
hsa-miR-139-5p	227.423	-1.48902	1.1415e-08	1.1415e-07
hsa-miR-326	109.103	-1.62316	1.57717e-06	1.21535e-05
hsa-miR-19a-5p	605.234	-1.69831	1.19743e-23	2.70454e-22
hsa-miR-4745-5p	92.1694	-1.80428	8.32926e-07	6.65325e-06
hsa-miR-125b-1-3p	19671.9	-1.92159	4.76e-76	4.16e-74
hsa-miR-25-5p	1035.91	-1.92323	2.43e-39	9.36e-38
hsa-miR-7975	59.4237	-1.92499	3.34631e-06	2.47665e-05
hsa-miR-222-5p	1995.37	-1.9988	7.71e-56	4.39e-54
hsa-miR-365b-5p	71.9931	-2.00598	1.82143e-07	1.63429e-06
hsa-miR-19b-1-5p	83.6999	-2.03269	1.08144e-07	9.90691e-07
hsa-miR-409-3p	139.691	-2.05251	1.97646e-13	2.75442e-12
hsa-miR-335-3p	1033.39	-2.05657	1.98e-41	8.37e-40
hsa-miR-146a-3p	50.35	-2.08763	4.34739e-05	0.000298171
hsa-miR-760	189.66	-2.13871	7.70952e-15	1.17436e-13
hsa-miR-7-5p	1666.52	-2.17084	2.51833e-59	1.582e-57
hsa-miR-1908-3p	139.992	-2.1983	8.74681e-13	1.16922e-11
hsa-miR-4454	835.279	-2.25347	3.59e-49	1.88e-47
hsa-miR-100-3p	21875.9	-2.30786	2.3e-106	7.54e-104
hsa-miR-33b-3p	604.899	-2.66516	1.61e-51	8.8e-50
hsa-miR-26a-1-3p	34.3317	-2.93523	3.14129e-06	2.35148e-05
hsa-miR-7974	2692.78	-3.2212	2.24e-133	9.78e-131
hsa-miR-549a	35.7372	-3.39066	8.56152e-09	8.69426e-08
hsa-miR-92a-1-5p	794.389	-3.45778	2.88e-92	3.77e-90
hsa-miR-128-2-5p	62.1218	-3.54236	3.90304e-16	6.64024e-15
hsa-miR-573	61.3097	-4.50195	3.50236e-16	6.03696e-15

## Sheet: Mel-501
miRNA	baseMean	log2FoldChange	pvalue	padj
hsa-miR-187-3p	65.1558	5.651	8.61876e-22	4.07617e-20
hsa-miR-486-5p	262.895	3.66616	3.60952e-49	4.69238e-47
hsa-miR-192-5p	2126.15	3.47427	1.99712e-60	5.19252e-58
hsa-miR-4532	79.9658	3.06397	1.33767e-11	3.18179e-10
hsa-miR-194-5p	34.3105	2.94052	5.32662e-10	1.06532e-08
hsa-miR-22-3p	16528.1	2.23424	1.11139e-40	9.63202e-39
hsa-let-7i-5p	668.301	1.94597	9.40654e-22	4.07617e-20
hsa-miR-4792	921.019	1.89728	1.05381e-14	3.42489e-13
hsa-miR-211-5p	8082.16	1.75486	7.56039e-24	4.91425e-22
hsa-miR-3909	32.7488	1.71273	1.34218e-05	9.97049e-05
hsa-miR-30e-3p	304.988	1.50091	1.94757e-07	2.66509e-06
hsa-miR-185-5p	57.4219	1.4517	3.01392e-05	0.000206215
hsa-miR-98-5p	177.385	1.43316	3.47465e-06	3.22646e-05
hsa-miR-181a-2-3p	234.286	1.41029	9.85679e-08	1.50751e-06
hsa-miR-1286	35.6559	1.39179	0.000155121	0.000858116
hsa-miR-30a-3p	161.551	1.32351	3.80455e-06	3.41097e-05
hsa-let-7c-5p	129.902	1.26215	7.80779e-07	9.66679e-06
hsa-miR-374a-5p	61.4815	1.2064	0.000150011	0.000847889
hsa-miR-30c-5p	1180.3	1.14901	1.34614e-11	3.18179e-10
hsa-let-7d-5p	58.9511	1.13991	0.000116511	0.000673175
hsa-let-7e-5p	444	1.13174	6.06115e-09	1.12564e-07
hsa-miR-148a-3p	18236.1	1.12026	3.80376e-10	8.24149e-09
hsa-miR-30e-5p	5830.21	1.10142	1.09621e-08	1.90011e-07
hsa-miR-769-5p	592.244	1.0809	1.77474e-07	2.56352e-06
hsa-miR-10b-5p	25278.8	1.06808	4.41326e-06	3.82483e-05
hsa-miR-30a-5p	6578.25	1.00694	4.87979e-07	6.34373e-06
hsa-miR-148a-5p	430.538	0.985366	1.25405e-05	9.58978e-05
hsa-let-7g-5p	837.596	0.946421	1.74675e-06	1.74675e-05
hsa-miR-181a-3p	369.874	0.931631	0.000670768	0.00322962
hsa-miR-191-5p	15002.1	0.930202	7.35937e-06	5.86979e-05
hsa-miR-374a-3p	218.548	0.885235	0.00077192	0.00364908
hsa-miR-582-3p	752.193	0.875768	0.000410406	0.00205203
hsa-miR-767-5p	413.34	0.864204	4.62168e-05	0.000300409
hsa-miR-421	364.295	0.846879	4.36516e-05	0.000291011
hsa-miR-132-3p	56.4997	0.833757	0.0094726	0.0324063
hsa-let-7b-5p	160.016	0.824944	0.000473219	0.00232145
hsa-let-7f-5p	1418.55	0.801086	1.40694e-06	1.46321e-05
hsa-let-7a-5p	5267.44	0.790557	1.79639e-05	0.000129739
hsa-miR-30b-5p	423.736	0.726448	0.00433542	0.0170789
hsa-miR-582-5p	135.614	0.682894	0.00372682	0.0151402
hsa-miR-1307-5p	1350.63	0.578359	0.00973121	0.0328586
hsa-miR-425-5p	267.696	0.503713	0.0168121	0.0499791
hsa-miR-148b-3p	936.719	0.479628	0.00514864	0.0194007
hsa-miR-204-5p	524.29	0.459597	0.0157108	0.0480564
hsa-miR-363-3p	2029.44	-0.484075	0.0147563	0.0456744
hsa-miR-378a-3p	3638.26	-0.509063	0.00632678	0.0231685
hsa-miR-19b-3p	476.288	-0.523099	0.0140213	0.0455691
hsa-miR-20a-5p	693.415	-0.585936	0.00390605	0.0156242
hsa-miR-106b-3p	388.435	-0.593565	0.00175309	0.00772548
hsa-miR-532-5p	506.849	-0.607588	0.000958888	0.00445198
hsa-miR-17-5p	581.291	-0.612428	0.00442231	0.0171612
hsa-miR-19a-3p	219.899	-0.631777	0.00338252	0.0139596
hsa-miR-92b-3p	4405.63	-0.727787	6.01253e-05	0.000372204
hsa-miR-877-5p	138.421	-0.7431	0.00142133	0.00637146
hsa-miR-130b-5p	97.1003	-0.788475	0.00901046	0.0312363
hsa-miR-3176	46.0429	-0.862868	0.0146568	0.0456744
hsa-miR-183-5p	99.2166	-0.932076	0.00662437	0.0239213
hsa-miR-502-3p	92.0104	-1.04728	0.00615117	0.0228472
hsa-miR-887-5p	36.3324	-1.06578	0.00797667	0.0280261
hsa-miR-18a-5p	110.459	-1.17094	7.45012e-06	5.86979e-05
hsa-miR-17-3p	89.9785	-1.28794	1.0191e-06	1.20439e-05
hsa-miR-1260a	558.542	-1.35462	8.63896e-05	0.000513887
hsa-miR-1260b	639.616	-1.38298	4.88738e-05	0.000309931
hsa-miR-33b-5p	33.8791	-1.42515	0.00029923	0.001556
hsa-miR-100-5p	712.148	-1.43488	0.00325044	0.0138544
hsa-miR-2467-5p	37.7598	-1.44896	8.69656e-05	0.000513887
hsa-miR-584-5p	246.715	-1.53241	9.30654e-12	2.68856e-10
hsa-miR-1301-3p	216.044	-1.5795	0.000159205	0.000862363
hsa-miR-18a-3p	68.9756	-1.64993	2.8598e-06	2.75388e-05
hsa-miR-7977	800.527	-1.65801	1.28353e-06	1.44007e-05
hsa-miR-4485-3p	670.053	-2.76062	0.00116413	0.00531006
hsa-miR-7974	51.7736	-3.31145	4.1713e-15	1.54934e-13

## Sheet: SK-Mel5
miRNA	baseMean	log2FoldChange	pvalue	padj
hsa-miR-181a-2-3p	1915.29	1.71084	1.91259e-18	3.19402e-16
hsa-miR-211-5p	12253.5	1.41722	3.3513e-19	1.11934e-16
hsa-miR-192-5p	2564.99	1.24334	4.15994e-10	2.77884e-08
hsa-miR-486-5p	71.3284	1.24309	0.000136891	0.00169339
hsa-miR-514a-5p	51.8454	1.08399	0.000382361	0.00336075
hsa-miR-509-3-5p	377.055	1.06046	6.45466e-07	1.42069e-05
hsa-miR-582-5p	272.743	1.03573	2.46214e-08	8.22356e-07
hsa-miR-514a-3p	678.413	1.01562	3.58035e-05	0.000569446
hsa-miR-509-5p	193.582	1.01435	2.70489e-07	7.52861e-06
hsa-miR-508-3p	1113.01	1.00376	5.20001e-12	4.34201e-10
hsa-miR-374b-5p	108.453	0.963181	0.000282051	0.00294391
hsa-miR-338-3p	106.338	0.939455	0.000347567	0.00313749
hsa-miR-582-3p	1808.44	0.9337	1.96923e-07	5.97928e-06
hsa-miR-509-3p	3180.58	0.932478	8.02964e-09	3.35238e-07
hsa-miR-194-5p	58.666	0.926762	0.00195413	0.01332
hsa-miR-508-5p	147.523	0.843866	6.55493e-05	0.000951891
hsa-miR-22-3p	56451.2	0.810955	5.46353e-10	3.04136e-08
hsa-miR-513c-5p	190.765	0.798332	0.000126436	0.00162422
hsa-miR-362-5p	355.109	0.78718	0.000334404	0.00313749
hsa-miR-500a-3p	7453.8	0.671612	0.00279965	0.0176431
hsa-miR-132-3p	189.091	0.667435	0.000698315	0.00555326
hsa-miR-30e-3p	1104.15	0.650204	0.000635771	0.00517921
hsa-miR-342-3p	389.002	0.636544	0.0003436	0.00313749
hsa-miR-361-5p	449.006	0.587077	0.00471074	0.0276033
hsa-let-7i-5p	21525.3	0.583896	5.80817e-06	9.69964e-05
hsa-miR-374a-5p	351.252	0.524354	0.00827422	0.0448938
hsa-miR-148a-3p	98778.3	0.468799	0.00162252	0.01129
hsa-miR-181a-5p	37421.8	0.466187	0.00314815	0.0191179
hsa-let-7d-3p	359.026	0.444367	0.00913304	0.047663
hsa-miR-10b-5p	111899	0.416669	0.00707158	0.0400323
hsa-miR-30e-5p	17984.5	0.400344	0.00302583	0.0187153
hsa-miR-125b-2-3p	786.058	-0.444115	0.00275793	0.0176431
hsa-miR-17-5p	1868.08	-0.479046	0.000211405	0.00235364
hsa-miR-1285-3p	415.547	-0.496107	0.0073742	0.0410497
hsa-miR-744-5p	372.64	-0.521677	0.00691774	0.0398367
hsa-miR-18a-5p	228.257	-0.611057	0.000756231	0.00574048
hsa-miR-589-3p	116.429	-0.674761	0.0034217	0.020408
hsa-miR-873-5p	155.902	-0.719074	0.000552039	0.00472772
hsa-miR-29b-3p	309.728	-0.726852	0.000328193	0.00313749
hsa-miR-1260a	484.802	-0.737315	0.00107108	0.00794979
hsa-miR-128-1-5p	185.456	-0.738397	0.000177902	0.00204894
hsa-miR-1260b	553.728	-0.764309	0.000747095	0.00574048
hsa-miR-21-3p	12969.7	-0.778567	4.05846e-06	7.13435e-05
hsa-miR-17-3p	170.071	-0.788321	0.000114084	0.00152416
hsa-miR-25-5p	136.134	-0.805959	0.00242683	0.0158934
hsa-miR-584-5p	1247.25	-0.851083	2.57259e-09	1.22749e-07
hsa-miR-100-3p	236.685	-0.883626	5.77306e-05	0.000876455
hsa-miR-27b-5p	263.71	-0.923391	0.000257807	0.00277766
hsa-miR-1268b	54.6194	-0.936365	0.00155643	0.0110606
hsa-miR-18a-3p	58.7967	-0.942373	0.00147776	0.0107298
hsa-miR-1268a	48.2608	-0.958604	0.0021449	0.014328
hsa-miR-877-5p	194.733	-1.03241	1.04896e-06	2.06091e-05
hsa-miR-222-5p	64.1555	-1.0625	0.000587241	0.00490346
hsa-miR-7-5p	181.076	-1.0668	5.89039e-07	1.40528e-05
hsa-miR-7977	141.776	-1.07117	2.21424e-06	4.10865e-05
hsa-miR-3176	92.2884	-1.16357	6.80569e-07	1.42069e-05
hsa-miR-4454	128.469	-1.19424	8.98652e-05	0.00125062
hsa-miR-7974	959.567	-1.23918	8.38907e-14	9.33983e-12
hsa-miR-29b-1-5p	82.8772	-1.27203	5.27201e-07	1.3545e-05
hsa-miR-92a-1-5p	58.9914	-1.46607	0.000158898	0.00189542
hsa-miR-873-3p	76.7967	-1.46937	2.04676e-08	7.59575e-07
