# Supplementary material for: A Network of MicroRNAs and mRNAs Involved in Melanosome Maturation and Trafficking Defines the Lower Response of Pigmentable Melanoma Cells to Targeted Therapy
Source: Cancers (Basel). 2023 Jan 31;15(3):894. doi: 10.3390/cancers15030894 (PMC9913661; doi:10.3390/cancers15030894)
Supplement: Supplementary file 1 [file cancers-15-00894-s001.zip › Supplementary Table S2-List of 5689 DE RNAs in 501Mel cells upon 48h of treatment with 2uM vem.xlsx]

## Sheet: DE RNAs in 501Mel 
gene	baseMean	log2FoldChange	lfcSE	stat	pvalue	padj
CYP19A1	233.463	6.37072	0.339642	18.7572	1.69213e-78	2.41288e-76
C17orf77	357.514	6.32442	0.306915	20.6064	2.40527e-94	4.66098e-92
PTGDS	212.429	6.11891	0.342335	17.874	1.87992e-71	2.16908e-69
PVALB	69.9065	5.49332	0.435024	12.6276	1.48685e-36	4.68203e-35
MAP7D2	1079.18	5.05904	0.169943	29.7691	9.81393e-195	6.18073e-192
NR5A2	163.578	4.99538	0.290884	17.1731	4.22322e-66	4.01472e-64
PRUNE2	2284.39	4.87391	0.143742	33.9074	5.1877e-252	5.60086e-249
ATP1A3	2997.17	4.85143	0.157824	30.7395	1.687e-207	1.27495e-204
SERPINB9	51.7181	4.73314	0.41646	11.3652	6.23372e-30	1.46082e-28
TGFB2	2025.78	4.65655	0.413143	11.2711	1.82375e-29	4.15777e-28
SLC5A10	127.449	4.58903	0.295876	15.51	2.9694e-54	1.79018e-52
C16orf89	168.31	4.28736	0.246502	17.3928	9.35934e-68	9.49439e-66
ASPA	241.252	4.19311	0.217586	19.271	9.40124e-83	1.5117e-80
ELFN2	97.6442	4.19195	0.322672	12.9914	1.36987e-38	4.74897e-37
MLIP	163.16	4.11843	0.244166	16.8673	7.8275e-64	6.95957e-62
SLC7A4	199.266	4.09451	0.223326	18.3342	4.41499e-75	5.65531e-73
PIK3AP1	32.31	3.97578	0.428706	9.27391	1.79438e-20	2.42811e-19
HKDC1	92.895	3.93795	0.298859	13.1766	1.19675e-39	4.31716e-38
MYLK	2177.17	3.93206	0.10508	37.4196	1.87591e-306	3.54429e-303
SCRT1	36.6912	3.90108	0.413214	9.44081	3.69895e-21	5.26953e-20
SPAG17	67.2839	3.88326	0.328643	11.816	3.22528e-32	8.39072e-31
KCNJ13	101.066	3.81202	0.287981	13.237	5.3622e-40	1.96246e-38
MAF	378.447	3.80145	0.181514	20.943	2.1753e-97	4.4432e-95
KIF1A	494.87	3.73189	0.174174	21.4263	7.59944e-102	1.6892e-99
LIMS2	147.435	3.71775	0.231819	16.0373	7.01308e-58	5.09629e-56
DGCR5	54.2222	3.71396	0.357854	10.3784	3.10897e-25	5.6413e-24
TP53INP2	11209.9	3.6857	0.11513	32.0133	7.11917e-225	6.7254e-222
AHNAK2	576.611	3.67719	0.33943	10.8334	2.39035e-27	4.86274e-26
CEND1	38.7524	3.65324	0.40187	9.0906	9.84972e-20	1.26705e-18
AIM2	46.2227	3.60839	0.372739	9.68072	3.64142e-22	5.48207e-21
SNAP25	144.068	3.56386	0.243888	14.6127	2.332e-48	1.11545e-46
HIST1H2AC	196.415	3.56163	0.216567	16.4459	8.97911e-61	7.21911e-59
NPY6R	94.1435	3.55386	0.301476	11.7882	4.48925e-32	1.15794e-30
LGI3	313.821	3.5141	0.187649	18.727	2.98283e-78	4.13628e-76
SERPINA1	114.78	3.48538	0.250452	13.9163	5.04001e-44	2.10441e-42
BCAN	9244.47	3.42348	0.092566	36.9842	2.05539e-299	3.45191e-296
KCNIP3	1085.69	3.40185	0.135645	25.0792	8.39413e-139	3.02089e-136
CDK15	511.656	3.33606	0.134053	24.8861	1.0533e-136	3.70248e-134
DCT	102257	3.10111	0.0711895	43.5613	0	0
MVP	132.998	3.08192	0.226928	13.5811	5.18488e-42	2.04087e-40
MPP4	33.463	3.04307	0.391414	7.77456	7.57082e-15	6.61462e-14
SCUBE1	58.6513	3.04191	0.326928	9.30452	1.34599e-20	1.83948e-19
PRICKLE1	98.1424	3.02347	0.266526	11.344	7.94098e-30	1.85228e-28
GALNT16	59.9426	2.98166	0.31074	9.59536	8.36283e-22	1.22485e-20
CD82	32.8319	2.96938	0.385644	7.69982	1.3626e-14	1.16623e-13
ITK	48.8516	2.94806	0.351915	8.37718	5.42088e-17	5.54374e-16
HIST1H4H	40.9946	2.9226	0.341138	8.56719	1.06038e-17	1.1564e-16
SERPINI1	545.011	2.88592	0.137715	20.9558	1.66261e-97	3.49032e-95
LDHD	43.4249	2.88282	0.343458	8.39351	4.71838e-17	4.85158e-16
PRODH	70.6171	2.88023	0.324746	8.86918	7.3685e-19	8.83927e-18
APOE	12145.7	2.88005	0.126124	22.835	2.06041e-115	5.56127e-113
SYT13	194.685	2.85674	0.223963	12.7554	2.90902e-37	9.47627e-36
TMEM232	38.4452	2.85524	0.355786	8.02516	1.01393e-15	9.48951e-15
DIO2	105.991	2.85001	0.232009	12.2841	1.10319e-34	3.22528e-33
OCA2	3663.13	2.84786	0.0857076	33.2276	4.30453e-242	4.33753e-239
C1orf54	86.8098	2.81346	0.258388	10.8885	1.30749e-27	2.69982e-26
CIART	87.9881	2.81033	0.272411	10.3165	5.9348e-25	1.05411e-23
TFAP2A-AS1	802.682	2.80564	0.133699	20.9847	9.04445e-98	1.95295e-95
ABAT	140.61	2.80374	0.220883	12.6934	6.43606e-37	2.05668e-35
BVES	2997.77	2.7979	0.0944224	29.6318	5.82449e-193	3.52149e-190
ITPR3	131.52	2.79181	0.236944	11.7826	4.79897e-32	1.23572e-30
TSPAN15	97.6983	2.75973	0.255051	10.8203	2.75825e-27	5.60362e-26
RORB-AS1	49.8636	2.73292	0.32272	8.46839	2.48804e-17	2.6134e-16
MYH7B	448.451	2.73132	0.505107	5.40742	6.39406e-08	2.87638e-07
SPTBN5	72.7228	2.71335	0.271818	9.98221	1.8235e-23	2.95099e-22
KCNIP2	370.956	2.69647	0.207686	12.9834	1.52029e-38	5.23443e-37
NCCRP1	48.9733	2.64686	0.310119	8.53496	1.40202e-17	1.51152e-16
PBRM1	31492.2	2.62535	0.100086	26.2308	1.18383e-151	4.97043e-149
SLC25A16	2415.25	2.61704	0.0911423	28.7137	2.57189e-181	1.2958e-178
NAT16	227.741	2.59696	0.208612	12.4487	1.42063e-35	4.32047e-34
CFH	89.3492	2.59063	0.267664	9.67865	3.7158e-22	5.58849e-21
CDH7	593.28	2.57404	0.136222	18.8959	1.23341e-79	1.7926e-77
ADSSL1	69.2007	2.56004	0.285865	8.9554	3.38496e-19	4.1529e-18
MUC20	127.907	2.5544	0.218333	11.6996	1.28127e-31	3.22773e-30
KCNN3	57.0645	2.54791	0.304505	8.36737	5.89161e-17	6.00484e-16
PIGZ	98.2302	2.53919	0.238779	10.6341	2.06892e-26	4.0092e-25
MAP7	224.14	2.50421	0.186156	13.4522	2.9875e-41	1.13458e-39
NCKAP5	204.116	2.50244	0.172204	14.5318	7.61893e-48	3.5764e-46
RGN	49.7619	2.46571	0.328826	7.49852	6.45411e-14	5.22797e-13
LIMCH1	2112.09	2.44526	0.0964956	25.3406	1.14062e-141	4.31011e-139
HLA-DPA1	55.0165	2.43373	0.29836	8.15702	3.43382e-16	3.31644e-15
SLC30A4	346.927	2.43301	0.146295	16.6308	4.17039e-62	3.46349e-60
RASD2	235.189	2.428	0.206804	11.7406	7.89424e-32	2.00204e-30
KCNB1	180.854	2.42757	0.218818	11.094	1.34168e-28	2.89707e-27
EPS8L2	33.6276	2.40059	0.348183	6.89461	5.40109e-12	3.64942e-11
SPP1	2123	2.38994	0.143253	16.6834	1.73113e-62	1.45367e-60
PCDH15	38.671	2.3894	0.33167	7.20413	5.84136e-13	4.34937e-12
SCN5A	37.3372	2.37832	0.337525	7.04636	1.8366e-12	1.29964e-11
MXD4	383.594	2.36471	0.152404	15.5161	2.699e-54	1.63837e-52
HIST1H2BD	379.174	2.35666	0.154196	15.2835	9.84585e-53	5.49151e-51
TANGO2	4276.99	2.34293	0.107508	21.7932	2.69131e-105	6.45701e-103
SPEF2	1744.02	2.32941	0.115089	20.2401	4.34571e-91	8.10931e-89
KLHL41	62.2853	2.32049	0.299897	7.7376	1.01308e-14	8.75509e-14
NECAB2	56.6211	2.31329	0.312816	7.39504	1.41368e-13	1.10257e-12
XYLT1	340.729	2.29874	0.349968	6.56843	5.0848e-11	3.14086e-10
ESRP1	765.402	2.29195	0.137705	16.6439	3.35193e-62	2.79914e-60
SYNGR3	59.4388	2.27584	0.301634	7.54504	4.52165e-14	3.70633e-13
DKK2	493.096	2.25472	0.128212	17.5858	3.16397e-69	3.32107e-67
C19orf71	44.1039	2.24861	0.350464	6.41609	1.39822e-10	8.32053e-10
GAA	619.044	2.2331	0.1535	14.5479	6.02586e-48	2.84628e-46
CNTNAP1	83.4299	2.21836	0.239484	9.26307	1.98633e-20	2.67587e-19
TCN2	646.278	2.2091	0.13862	15.9364	3.54242e-57	2.42279e-55
PODN	136.209	2.20551	0.254207	8.67602	4.09862e-18	4.63703e-17
DNER	1263.2	2.20273	0.133778	16.4655	6.48865e-61	5.24471e-59
PPP2R5B	714.417	2.19677	0.124364	17.664	7.9365e-70	8.56859e-68
AATBC	78.3531	2.19123	0.307194	7.13304	9.81739e-13	7.16859e-12
SIAE	1388.93	2.18824	0.0968037	22.6049	3.87521e-113	1.02761e-110
EPHX1	1153.31	2.17797	0.104721	20.7978	4.53449e-96	9.01827e-94
DUSP9	33.9186	2.17742	0.365947	5.95008	2.68009e-09	1.4105e-08
ABTB2	161.637	2.16849	0.191842	11.3035	1.26133e-29	2.91068e-28
CRAT	474.323	2.1635	0.318428	6.79432	1.08827e-11	7.14871e-11
FN3K	1940.35	2.15943	0.130713	16.5204	2.61708e-61	2.12673e-59
ADD2	1158.52	2.15894	0.109627	19.6936	2.44694e-86	4.2029e-84
IL17D	399.817	2.14989	0.172379	12.4719	1.06283e-35	3.28184e-34
CPLX1	388.828	2.13282	0.187251	11.3902	4.67942e-30	1.10861e-28
POPDC3	1787.7	2.1327	0.0882412	24.169	4.71672e-129	1.45496e-126
ARHGAP23	413.518	2.13216	0.159605	13.359	1.04964e-40	3.9466e-39
PNMA6A	37.4525	2.11652	0.337838	6.26491	3.73035e-10	2.14063e-09
IGF1	405.639	2.11376	0.204744	10.3239	5.49258e-25	9.7786e-24
LRAT	550.075	2.11176	0.121573	17.3704	1.38371e-67	1.39432e-65
ACADS	652.971	2.10469	0.139886	15.0457	3.68174e-51	1.93227e-49
SIK1	154.289	2.10068	0.186142	11.2854	1.54978e-29	3.54387e-28
TMEM86A	186.968	2.09502	0.211446	9.90806	3.84043e-23	6.06563e-22
ACYP2	43.741	2.09112	0.310139	6.74254	1.55637e-11	1.00748e-10
CCDC171	1610.07	2.08564	0.126091	16.5407	1.86763e-61	1.5259e-59
SMIM14	242.744	2.07571	0.176792	11.741	7.85618e-32	1.99573e-30
SNCB	700.558	2.06747	0.142652	14.4931	1.33954e-47	6.22987e-46
CADPS	123.965	2.06333	0.210001	9.82534	8.7582e-23	1.35775e-21
NMNAT2	38.8684	2.0531	0.333832	6.15011	7.74293e-10	4.29965e-09
EPAS1	4828.67	2.04214	0.0910242	22.4351	1.78787e-111	4.65924e-109
VEPH1	12056.8	2.03965	0.097362	20.9491	1.91113e-97	3.95709e-95
PDE2A	79.8734	2.03872	0.249284	8.17833	2.87803e-16	2.80292e-15
ST6GALNAC2	4265.11	2.02709	0.152708	13.2743	3.26393e-40	1.20917e-38
MAST4	246.263	2.02591	0.169228	11.9715	5.01274e-33	1.36765e-31
KIAA0513	224.812	2.02368	0.16041	12.6157	1.73114e-36	5.43994e-35
SLC26A1	258.475	2.01392	0.166319	12.1087	9.49323e-34	2.69718e-32
STK32A	1326.75	2.00979	0.114017	17.6271	1.52563e-69	1.61258e-67
SLC35D2	1471.25	2.00455	0.101928	19.6662	4.19724e-86	7.12823e-84
CTNND2	1027.3	1.99086	0.118203	16.8427	1.18674e-63	1.03685e-61
FAM69C	61.1757	1.99071	0.280724	7.09137	1.32795e-12	9.55807e-12
ATG2A	2192.63	1.98454	0.114985	17.2591	9.56671e-67	9.26928e-65
LRRC39	350.567	1.97444	0.374731	5.26896	1.37201e-07	5.91328e-07
MIR22HG	269.031	1.9589	0.175814	11.1419	7.84242e-29	1.7381e-27
C1QTNF1	48.8568	1.94138	0.337824	5.74672	9.09911e-09	4.53381e-08
CTSO	139.658	1.93848	0.21814	8.88639	6.31262e-19	7.62712e-18
GAS2L1	1067.6	1.93304	0.114631	16.8631	8.40123e-64	7.426e-62
OR7A5	129.155	1.93117	0.218032	8.85728	8.19933e-19	9.80482e-18
PRDM7	4004.79	1.91303	0.352217	5.43141	5.5911e-08	2.5325e-07
BTBD9	952.547	1.91213	0.112429	17.0074	7.23898e-65	6.55193e-63
HSPB8	79.2567	1.91171	0.237253	8.05767	7.77599e-16	7.3413e-15
MBP	16185.3	1.90071	0.0765902	24.8166	5.93708e-136	1.9942e-133
LURAP1L	80.5896	1.89293	0.250126	7.56789	3.79328e-14	3.1348e-13
MGAT5B	697.353	1.88747	0.137702	13.707	9.2213e-43	3.69708e-41
ST8SIA6	64.9102	1.88336	0.283062	6.65352	2.86167e-11	1.81131e-10
TEX41	1212.3	1.87972	0.109436	17.1763	3.99423e-66	3.82106e-64
FAM167A	646.476	1.87695	0.164202	11.4307	2.9362e-30	7.01116e-29
TSPAN10	4385.11	1.87147	0.120609	15.5168	2.6692e-54	1.62681e-52
PLP1	14151.1	1.86868	0.0809286	23.0904	5.77638e-118	1.64736e-115
ACSF2	1249.26	1.86608	0.151031	12.3556	4.54472e-35	1.3549e-33
LRRN4CL	42.396	1.86588	0.339452	5.49676	3.86833e-08	1.79576e-07
SDSL	103.188	1.85899	0.218139	8.52205	1.56756e-17	1.67921e-16
CDKL5	193.928	1.85897	0.19956	9.31535	1.21551e-20	1.6687e-19
AMOTL2	144.976	1.85809	0.218767	8.49344	2.00604e-17	2.12483e-16
RAB3B	52.4538	1.85789	0.297584	6.24323	4.28637e-10	2.44221e-09
FRY	339.882	1.85741	0.189336	9.81013	1.01835e-22	1.57547e-21
LINC01594	59.3982	1.85555	0.272016	6.82149	9.00996e-12	5.97305e-11
OGDH	10520.2	1.85483	0.101322	18.3063	7.3673e-75	9.27973e-73
SYNGR1	237.116	1.85388	0.177472	10.446	1.52759e-25	2.80895e-24
GDPD5	1891.96	1.85179	0.111669	16.5828	9.27421e-62	7.66009e-60
TNFSF4	36.1192	1.85063	0.321584	5.75473	8.67782e-09	4.34322e-08
HHAT	1420.91	1.84717	0.115588	15.9806	1.74431e-57	1.21499e-55
SLC46A3	687.097	1.84644	0.121699	15.1723	5.39811e-52	2.93498e-50
KLF14	35.3057	1.84331	0.329673	5.59135	2.25311e-08	1.07432e-07
NDRG2	1436.67	1.8427	0.106831	17.2487	1.1436e-66	1.10099e-64
RORB	2647.1	1.83969	0.0965943	19.0455	7.15377e-81	1.0498e-78
RILP	109.195	1.83252	0.212871	8.60858	7.39692e-18	8.17284e-17
AHCYL1	35065.1	1.82929	0.0953971	19.1755	5.92728e-82	9.23617e-80
EVI5L	347.601	1.82297	0.185831	9.80982	1.0215e-22	1.57872e-21
BBS5	1211.5	1.82205	0.120764	15.0876	1.95322e-51	1.03589e-49
NNT	10340.5	1.82149	0.0741378	24.569	2.71113e-133	8.90841e-131
VPS9D1	271.816	1.81449	0.1541	11.7747	5.26938e-32	1.35454e-30
AHRR	1092.31	1.81333	0.101782	17.8159	5.31778e-71	5.99837e-69
LOC101929596	42.2247	1.81145	0.352497	5.13889	2.76365e-07	1.14728e-06
SRRM3	319.731	1.81095	0.189396	9.56169	1.15849e-21	1.68533e-20
CHRNB2	96.0083	1.80566	0.26501	6.81353	9.52333e-12	6.29681e-11
LOC100505912	1488.49	1.80455	0.110023	16.4016	1.86411e-60	1.47519e-58
LINC00673	458.112	1.80387	0.144449	12.488	8.68322e-36	2.68948e-34
TPBGL	360.091	1.7979	0.150256	11.9656	5.38256e-33	1.46063e-31
LOC100128288	102.994	1.7971	0.259006	6.93845	3.96422e-12	2.70882e-11
ACO2	10563.4	1.79694	0.077727	23.1186	3.01266e-118	8.75699e-116
C1orf198	2610.77	1.79101	0.104995	17.058	3.04572e-65	2.80708e-63
RBPMS2	163.365	1.78896	0.179671	9.95691	2.35262e-23	3.77895e-22
FAM63A	1143.43	1.78532	0.119046	14.9969	7.69427e-51	3.95574e-49
FAM127A	1897.46	1.7807	0.0958384	18.5802	4.64592e-77	6.21443e-75
KRBA2	437.15	1.77851	0.128529	13.8373	1.51707e-43	6.24809e-42
PSMG3-AS1	52.2914	1.77483	0.281358	6.30807	2.82532e-10	1.63871e-09
PTP4A3	139.076	1.77012	0.213434	8.29353	1.09932e-16	1.10114e-15
GFPT2	237.015	1.76782	0.215641	8.19798	2.44456e-16	2.39776e-15
IFITM10	150.426	1.7603	0.190102	9.25976	2.04898e-20	2.75536e-19
SLC7A5	48454.1	1.75947	0.0987227	17.8223	4.74391e-71	5.3913e-69
NEFL	1300.3	1.75546	0.114154	15.378	2.29977e-53	1.33696e-51
FAHD2CP	123.029	1.75387	0.267263	6.56234	5.29704e-11	3.26262e-10
PSMB10	372.871	1.73961	0.132616	13.1176	2.60938e-39	9.30208e-38
LINC00462	40.2747	1.7378	0.331765	5.23803	1.62296e-07	6.94535e-07
RNASEL	341.211	1.73602	0.158671	10.941	7.33529e-28	1.53564e-26
TUBA1A	5407.05	1.73533	0.0990083	17.5271	8.89553e-69	9.20931e-67
TMEM54	286.044	1.72502	0.144735	11.9185	9.48394e-33	2.54618e-31
GOT1	8771.12	1.72471	0.105496	16.3485	4.45636e-60	3.43662e-58
NUDT18	64.4228	1.72369	0.287035	6.00515	1.91154e-09	1.02095e-08
SOCS6	5164.68	1.72229	0.107301	16.051	5.62622e-58	4.12817e-56
SUOX	1499.46	1.71749	0.149223	11.5095	1.18114e-30	2.86565e-29
WDFY3-AS2	88.1718	1.71605	0.230811	7.43487	1.04672e-13	8.27036e-13
TOM1L2	604.463	1.71477	0.154115	11.1266	9.31402e-29	2.04922e-27
HLA-F-AS1	326.383	1.71415	0.183135	9.36004	7.97071e-21	1.11864e-19
RAP2C-AS1	57.8683	1.70981	0.303753	5.62896	1.81302e-08	8.74684e-08
UBAP1L	978.352	1.70345	0.13544	12.5772	2.81722e-36	8.81621e-35
RALGPS1	177.388	1.70016	0.178782	9.50969	1.91235e-21	2.75813e-20
GIPR	50.339	1.69261	0.302008	5.6045	2.08861e-08	9.9966e-08
TTLL1	189.713	1.68424	0.166137	10.1377	3.76021e-24	6.35744e-23
FSTL5	3747.42	1.68398	0.0851923	19.7668	5.74844e-87	9.98708e-85
NKAIN1	44.9119	1.68188	0.301153	5.58481	2.33953e-08	1.11336e-07
LOC728743	456.411	1.67561	0.128069	13.0836	4.08674e-39	1.44325e-37
ALDH3B1	75.6648	1.67532	0.26132	6.41098	1.44592e-10	8.59419e-10
ABLIM3	35.5552	1.67453	0.35022	4.78135	1.74119e-06	6.52247e-06
C21orf91	6214.68	1.67302	0.108848	15.3703	2.59075e-53	1.48331e-51
OGDHL	130.625	1.6676	0.209227	7.97028	1.58316e-15	1.46001e-14
MYRF	209.46	1.66603	0.215006	7.74874	9.28099e-15	8.05294e-14
RTN4R	505.087	1.66517	0.148668	11.2006	4.05108e-29	9.07141e-28
FSTL3	187.94	1.664	0.250229	6.6499	2.93289e-11	1.85406e-10
AFF3	1997	1.65744	0.0938872	17.6535	9.56264e-70	1.0251e-67
MYL5	57.0665	1.65501	0.270598	6.11612	9.58817e-10	5.27384e-09
PCSK1N	58.1685	1.65247	0.322131	5.12982	2.90018e-07	1.20231e-06
GAB1	1795.8	1.65173	0.09865	16.7434	6.33121e-63	5.34616e-61
TMEM150C	101.195	1.64704	0.299955	5.49098	3.99714e-08	1.84987e-07
ST20-AS1	239.337	1.64647	0.168401	9.77709	1.41216e-22	2.16919e-21
ZNF713	151.032	1.64252	0.206033	7.97214	1.55954e-15	1.4391e-14
DCAF12L1	35.7161	1.63909	0.334749	4.89646	9.75769e-07	3.78999e-06
DECR1	2213.55	1.63585	0.0914903	17.88	1.68756e-71	1.96212e-69
IRF4	1832.01	1.63379	0.142345	11.4777	1.70795e-30	4.09772e-29
ST6GALNAC1	443.938	1.63246	0.185226	8.81333	1.21478e-18	1.4278e-17
CFAP61	5646.64	1.63093	0.140554	11.6035	3.95361e-31	9.79652e-30
LOC100506688	1510.19	1.62778	0.118683	13.7154	8.21621e-43	3.31168e-41
SLC6A8	3648.52	1.62768	0.0848884	19.1743	6.06809e-82	9.3591e-80
LAMA5	521.814	1.62493	0.366135	4.43806	9.07752e-06	3.09233e-05
VWA1	179.413	1.62272	0.187928	8.6348	5.8832e-18	6.55303e-17
RHOBTB1	2758.96	1.621	0.0991011	16.357	3.87837e-60	3.00623e-58
TFAP2A	14221.2	1.61705	0.0815713	19.8237	1.85912e-87	3.26751e-85
OSBPL10	4320.37	1.6155	0.31008	5.20994	1.88898e-07	8.00896e-07
HELZ2	1315.45	1.6146	0.107655	14.9979	7.57276e-51	3.90656e-49
LOC100419583	1268.78	1.61036	0.0957329	16.8214	1.7006e-63	1.46883e-61
DMTN	126.227	1.60774	0.210436	7.64005	2.17133e-14	1.82839e-13
TRANK1	167.002	1.60467	0.188749	8.50163	1.86946e-17	1.98712e-16
MPC2	1741.46	1.60295	0.101734	15.7563	6.21703e-56	4.03306e-54
KCND3	52.4642	1.60259	0.283574	5.65139	1.59153e-08	7.72761e-08
SLFN5	1651.61	1.60259	0.148137	10.8183	2.81985e-27	5.7134e-26
NMNAT1	752.732	1.60158	0.101631	15.7587	5.98373e-56	3.89845e-54
SLC22A17	102.024	1.5996	0.266165	6.0098	1.85752e-09	9.94913e-09
ABCB5	3091.39	1.59707	0.100585	15.8778	9.02703e-57	6.06416e-55
CHSY3	836.299	1.59605	0.124421	12.8278	1.1457e-37	3.83124e-36
SLAIN1	2966.08	1.59485	0.0858055	18.5868	4.11276e-77	5.55038e-75
LINC00173	59.401	1.59288	0.331752	4.80142	1.57544e-06	5.93685e-06
GSTK1	1272.34	1.58668	0.101315	15.6608	2.80362e-55	1.75837e-53
PTPRU	675.705	1.58484	0.1775	8.92868	4.31112e-19	5.26354e-18
ZNF629	2360.12	1.58173	0.0996228	15.8772	9.12277e-57	6.10136e-55
ROBO2	1724.04	1.58026	0.101038	15.6403	3.87159e-55	2.39833e-53
DEXI	1010.55	1.57881	0.143023	11.0388	2.48249e-28	5.32238e-27
MEIS3	197.998	1.57569	0.182122	8.65184	5.06769e-18	5.69926e-17
IDH3A	9842.5	1.5728	0.102052	15.4118	1.36396e-53	7.95996e-52
DUSP15	91.9149	1.57264	0.216797	7.25396	4.0475e-13	3.04975e-12
CACFD1	105.414	1.57249	0.2205	7.13147	9.93016e-13	7.24394e-12
ZNF48	153.412	1.57054	0.197348	7.95822	1.74534e-15	1.6037e-14
FSTL4	163.164	1.56941	0.194212	8.08091	6.42849e-16	6.10343e-15
TECPR2	2525.9	1.56824	0.113696	13.7933	2.79544e-43	1.14507e-41
RAB3A	2007.4	1.56205	0.125509	12.4457	1.47627e-35	4.48069e-34
ZFHX2	101.714	1.55957	0.2306	6.76309	1.35083e-11	8.76299e-11
SMPD1	1515.44	1.55906	0.0912828	17.0794	2.11257e-65	1.95899e-63
PIK3R3	920.303	1.55319	0.108989	14.2508	4.42865e-46	1.98632e-44
SEMA3C	9193.07	1.54873	0.0826919	18.7289	2.8792e-78	4.02954e-76
STAC	60.1343	1.54859	0.279537	5.53984	3.02755e-08	1.42249e-07
ZNF737	76.6586	1.54843	0.237369	6.52331	6.87713e-11	4.19483e-10
ETFDH	1351.74	1.54804	0.0973135	15.9078	5.59736e-57	3.7939e-55
RAB32	4829.41	1.54795	0.0820876	18.8573	2.55819e-79	3.68258e-77
NAP1L5	2378.07	1.5479	0.0805929	19.2065	3.26758e-82	5.14474e-80
OPTN	898.771	1.54668	0.139195	11.1116	1.10122e-28	2.39841e-27
GPR157	108.592	1.54451	0.224288	6.8863	5.72634e-12	3.85884e-11
PRADC1	497.438	1.54432	0.142146	10.8644	1.70366e-27	3.494e-26
NXPH4	379.25	1.54253	0.171054	9.01778	1.91937e-19	2.40758e-18
GABRA3	162.988	1.53897	0.180443	8.52885	1.4781e-17	1.59014e-16
GALNS	907.177	1.53772	0.0993386	15.4796	4.76678e-54	2.83661e-52
ACSS2	1266.42	1.53411	0.126991	12.0805	1.33974e-33	3.77099e-32
ALDH2	1447.92	1.53257	0.126661	12.0998	1.05886e-33	3.00276e-32
NQO2	1331.11	1.53118	0.101045	15.1535	7.18488e-52	3.87855e-50
FGD3	32.7546	1.53004	0.331958	4.60912	4.04368e-06	1.44617e-05
LINC01320	60.0567	1.52958	0.345993	4.42084	9.83189e-06	3.33353e-05
CPPED1	1872.39	1.52649	0.0953433	16.0104	1.08061e-57	7.70442e-56
GALNT10	2342.55	1.52194	0.0994246	15.3075	6.81802e-53	3.81683e-51
CERS4	412.457	1.51536	0.142167	10.659	1.58339e-26	3.08415e-25
NECAB3	1080.42	1.51135	0.100109	15.0969	1.6961e-51	9.091e-50
PC	1118.37	1.51068	0.0989915	15.2607	1.39797e-52	7.74005e-51
SLC4A3	104.708	1.5099	0.273818	5.51424	3.50284e-08	1.63412e-07
ADAMTS13	66.0483	1.50938	0.279046	5.40907	6.33517e-08	2.85158e-07
DISP2	141.342	1.50194	0.186488	8.0538	8.02594e-16	7.57254e-15
FAM81A	1996.58	1.50103	0.0941849	15.937	3.50718e-57	2.40959e-55
ZNF366	60.6955	1.49533	0.269207	5.55458	2.78281e-08	1.31444e-07
CIDECP	201.578	1.49386	0.168859	8.84679	9.00691e-19	1.07281e-17
CARF	180.423	1.49298	0.179048	8.33845	7.52706e-17	7.62033e-16
HAS2	7637.61	1.49113	0.107441	13.8786	8.5353e-44	3.53455e-42
TYRP1	262663	1.48943	0.0813671	18.305	7.54295e-75	9.42245e-73
HIST1H2BC	36.8031	1.48091	0.339458	4.36258	1.2854e-05	4.28042e-05
GPR155	71.4191	1.47838	0.279962	5.28063	1.28737e-07	5.57395e-07
CYB5D2	262.767	1.47082	0.171635	8.56949	1.03946e-17	1.1344e-16
CAPN1	3161.69	1.47043	0.0887345	16.5711	1.12661e-61	9.25477e-60
RAB30	1029.39	1.46831	0.09566	15.3493	3.58274e-53	2.04351e-51
THRA	1670.88	1.46671	0.0916045	16.0114	1.06454e-57	7.62581e-56
CNPPD1	1888.87	1.46663	0.0927469	15.8133	2.52029e-56	1.65627e-54
ZNF585A	148.573	1.46406	0.198736	7.36686	1.74699e-13	1.35414e-12
EMP1	6637.58	1.46377	0.117397	12.4685	1.10827e-35	3.40476e-34
CCDC151	45.0141	1.46367	0.316493	4.62465	3.75238e-06	1.35095e-05
FHOD3	1882.93	1.46229	0.0867504	16.8563	9.43599e-64	8.29215e-62
SHF	220.929	1.46169	0.183816	7.95191	1.83652e-15	1.68135e-14
DUSP8	534.924	1.46099	0.133214	10.9672	5.49175e-28	1.15933e-26
FAM102A	1879.64	1.45969	0.0912662	15.9937	1.41303e-57	9.98036e-56
HPGD	22465.1	1.45848	0.0948593	15.3752	2.40253e-53	1.39135e-51
ADPRHL1	102.041	1.45676	0.214008	6.80706	9.96148e-12	6.57214e-11
MFSD6	488.384	1.45555	0.17026	8.54899	1.24172e-17	1.34832e-16
DMXL1	3828.65	1.45296	0.0800279	18.1557	1.1581e-73	1.40038e-71
IKZF4	633.169	1.45258	0.137572	10.5587	4.62967e-26	8.74718e-25
TACC2	155.143	1.4525	0.212194	6.84514	7.6402e-12	5.10529e-11
RCBTB2	550.486	1.4508	0.128457	11.294	1.40438e-29	3.22603e-28
BLCAP	1711.3	1.45038	0.092164	15.7369	8.4497e-56	5.43477e-54
KCNH8	35.074	1.44834	0.322098	4.49658	6.90537e-06	2.38516e-05
ATP10D	440.014	1.44611	0.128376	11.2647	1.96071e-29	4.45655e-28
ACADSB	1796.74	1.44166	0.105367	13.6822	1.29671e-42	5.17142e-41
CPQ	943.954	1.4389	0.108952	13.2068	8.01253e-40	2.91128e-38
ENDOG	220.852	1.43633	0.169109	8.4935	2.00503e-17	2.12483e-16
CRYL1	712.105	1.43322	0.156861	9.1369	6.42657e-20	8.33799e-19
TMEM117	1120.46	1.43266	0.119092	12.0298	2.47645e-33	6.89347e-32
PPM1L	42.8049	1.43238	0.305904	4.68243	2.83488e-06	1.03676e-05
SYT5	140.171	1.43212	0.236735	6.04945	1.45338e-09	7.8794e-09
KIAA1456	1010.06	1.43197	0.122035	11.7342	8.51776e-32	2.15655e-30
PINK1	1166.2	1.42804	0.137003	10.4234	1.9391e-25	3.54836e-24
AK9	297.353	1.42673	0.148492	9.60815	7.38637e-22	1.08922e-20
MTURN	11935	1.42565	0.0907292	15.7132	1.22839e-55	7.8342e-54
PPARGC1A	24876	1.42483	0.0973795	14.6317	1.76206e-48	8.48204e-47
TAF13	2229.54	1.42456	0.13233	10.7652	5.02593e-27	1.0022e-25
EPS15	11590	1.42437	0.0875915	16.2614	1.85306e-59	1.39348e-57
ST7	4126.18	1.42296	0.093463	15.2249	2.41749e-52	1.33359e-50
DHRS4	462.647	1.41863	0.142875	9.92918	3.10792e-23	4.95733e-22
AK1	1250.07	1.41739	0.0938677	15.0999	1.62271e-51	8.72855e-50
ZNF773	503.485	1.41735	0.117999	12.0116	3.08891e-33	8.50434e-32
CYB561A3	2045.02	1.41702	0.0903071	15.6911	1.73888e-55	1.09513e-53
VEGFB	2437.91	1.41498	0.101641	13.9213	4.70006e-44	1.97887e-42
SERPINB6	1729.92	1.41418	0.0921795	15.3416	4.03039e-53	2.28162e-51
ACAD10	1615.21	1.41319	0.142396	9.92439	3.26089e-23	5.1828e-22
NCOA4	17655.6	1.4122	0.103379	13.6603	1.75174e-42	6.94949e-41
ADHFE1	38.4903	1.41152	0.363305	3.88521	0.000102242	0.000298916
RSPH3	181.925	1.40899	0.213831	6.58928	4.41972e-11	2.74688e-10
SHB	1159.56	1.40817	0.122202	11.5233	1.00658e-30	2.46589e-29
GLI4	383.348	1.40689	0.165946	8.47796	2.29174e-17	2.41618e-16
ADI1	3291.09	1.40586	0.134002	10.4913	9.4725e-26	1.76109e-24
IPO13	3155.98	1.40142	0.0794283	17.6438	1.1359e-69	1.20909e-67
TCONS_00029157	1129.66	1.40113	0.0949009	14.7642	2.49436e-49	1.2443e-47
ABCA7	456.225	1.40028	0.174597	8.02004	1.0571e-15	9.87519e-15
CRTC1	681.97	1.3987	0.13512	10.3515	4.11954e-25	7.42156e-24
DNAH1	73.5288	1.39594	0.268145	5.20589	1.9307e-07	8.17208e-07
LRRC16B	165.588	1.39435	0.192966	7.22586	4.97928e-13	3.72767e-12
MMP24-AS1	1136.01	1.39386	0.135585	10.2804	8.63759e-25	1.51987e-23
LOC101927318	157.053	1.39135	0.19402	7.17115	7.43699e-13	5.48609e-12
SNTA1	338.459	1.39003	0.143723	9.67162	3.98043e-22	5.98054e-21
SLC37A1	921.066	1.38728	0.119618	11.5976	4.23684e-31	1.04812e-29
PRDM11	103.334	1.38704	0.208274	6.65968	2.74417e-11	1.74278e-10
TOM1	2294.09	1.38686	0.0944309	14.6865	7.86218e-49	3.84585e-47
OPRL1	38.619	1.38595	0.344295	4.02548	5.68596e-05	0.000172361
RAB3C	274.236	1.3846	0.148826	9.30344	1.35978e-20	1.8533e-19
GPR158	5520.49	1.38453	0.087157	15.8855	7.99067e-57	5.39192e-55
BDH1	928.379	1.38342	0.0969658	14.2671	3.50746e-46	1.57783e-44
CAPS2	133.296	1.38277	0.196591	7.03376	2.01036e-12	1.41596e-11
FCRLA	485.972	1.38209	0.181619	7.60981	2.74489e-14	2.29221e-13
CIB2	531.545	1.37437	0.129307	10.6287	2.19038e-26	4.23371e-25
FITM2	191.829	1.37366	0.159964	8.58734	8.9006e-18	9.76288e-17
UROS	986.293	1.37163	0.106569	12.8708	6.57574e-38	2.21858e-36
TUBBP5	50.2812	1.37106	0.311141	4.40657	1.05022e-05	3.54491e-05
ZER1	1218.79	1.37051	0.13547	10.1167	4.65933e-24	7.79909e-23
PIK3IP1	48.516	1.36691	0.325821	4.19528	2.72538e-05	8.65956e-05
DAAM1	2733.53	1.36248	0.106073	12.8447	9.21378e-38	3.09481e-36
LINC01137	40.5973	1.36194	0.313648	4.34225	1.41033e-05	4.67378e-05
HSD17B14	430.659	1.36121	0.13763	9.89036	4.58373e-23	7.21699e-22
MPC1	1677.35	1.35629	0.0893715	15.1759	5.11051e-52	2.78864e-50
PKLR	141.224	1.35367	0.20202	6.7007	2.07417e-11	1.33126e-10
AGL	5188.24	1.35189	0.0951114	14.2138	7.52273e-46	3.36408e-44
SLC38A3	34.8004	1.35142	0.349829	3.86307	0.00011197	0.000324778
HLA-A	10759.2	1.35091	0.111087	12.1608	5.02571e-34	1.44418e-32
PARP8	2237.11	1.35021	0.0852152	15.8447	1.5301e-56	1.01883e-54
CNTN1	815.496	1.34856	0.164807	8.18267	2.77616e-16	2.70721e-15
VAT1	18975.9	1.34809	0.0778877	17.3081	4.08776e-67	4.03833e-65
NAV1	2263.92	1.34645	0.155192	8.67604	4.09773e-18	4.63703e-17
LOC100130370	1235.5	1.3458	0.102068	13.1853	1.06612e-39	3.85512e-38
SLC23A3	56.9614	1.34517	0.266236	5.05254	4.35976e-07	1.77287e-06
TSPYL1	3049.3	1.34198	0.0821681	16.3321	5.83475e-60	4.47676e-58
LAMB2	5897.81	1.3373	0.10795	12.3881	3.02991e-35	9.08673e-34
FAM151B	70.4247	1.33343	0.283053	4.71089	2.46632e-06	9.08124e-06
DHRS4L2	43.231	1.33303	0.29223	4.56158	5.07708e-06	1.78798e-05
CUBN	501.776	1.33255	0.12948	10.2916	7.6915e-25	1.35973e-23
FBXO2	94.9047	1.32721	0.26935	4.92745	8.33087e-07	3.26728e-06
DUSP3	6964.03	1.32484	0.0944911	14.0208	1.16352e-44	5.01045e-43
SOD2	4289.66	1.32157	0.0901358	14.662	1.12932e-48	5.47103e-47
LINGO2	71.7314	1.32129	0.264673	4.99216	5.97081e-07	2.38186e-06
SNX21	434.669	1.3191	0.123125	10.7134	8.80402e-27	1.73498e-25
FAM189A2	99.6327	1.31759	0.227175	5.79987	6.63655e-09	3.36277e-08
MOB3B	4340.77	1.31593	0.0855941	15.374	2.44415e-53	1.41005e-51
LOC100288181	32.7787	1.31463	0.336068	3.91179	9.16162e-05	0.000269412
ABR	12973.3	1.31207	0.120102	10.9247	8.78735e-28	1.83454e-26
KRCC1	151.517	1.31078	0.183627	7.13826	9.45169e-13	6.92163e-12
GSTM4	2348.37	1.31024	0.0845836	15.4905	4.02217e-54	2.40297e-52
NRSN2-AS1	260.298	1.30861	0.151506	8.63731	5.7552e-18	6.41518e-17
GYS1	5753.1	1.30845	0.0780992	16.7537	5.32181e-63	4.51906e-61
VPS13D	5868.34	1.30678	0.106072	12.3197	7.09475e-35	2.09858e-33
ALDH6A1	470.197	1.3046	0.163838	7.96273	1.68284e-15	1.54815e-14
PAQR8	434.298	1.30403	0.163321	7.98448	1.41114e-15	1.30775e-14
C9orf9	48.9311	1.30392	0.282391	4.61741	3.88563e-06	1.39438e-05
KLC4	652.141	1.30274	0.154275	8.4443	3.05863e-17	3.19055e-16
ATP6AP1	4051.69	1.29628	0.082799	15.6558	3.03344e-55	1.88685e-53
C14orf37	258.436	1.2956	0.397807	3.25685	0.00112657	0.00276476
ANKEF1	213.939	1.29339	0.158397	8.16547	3.2019e-16	3.10435e-15
EML6	136.493	1.29307	0.191024	6.76916	1.29535e-11	8.41754e-11
HGSNAT	1573.8	1.29155	0.113979	11.3315	9.16561e-30	2.12808e-28
ATP5G3	5155.05	1.29021	0.083186	15.5099	2.97277e-54	1.79018e-52
MTFR1L	2579.3	1.28975	0.0877278	14.7018	6.2808e-49	3.09232e-47
PHF7	451.586	1.28813	0.148982	8.64622	5.32354e-18	5.96095e-17
RNF14	3024.85	1.28813	0.0838067	15.3703	2.59063e-53	1.48331e-51
ATP6V0E2-AS1	158.854	1.28772	0.186584	6.90154	5.14428e-12	3.48212e-11
TMEM132A	1157.54	1.28746	0.150613	8.54812	1.25112e-17	1.35755e-16
ITGAX	44.3556	1.28582	0.285526	4.50334	6.68953e-06	2.31643e-05
MAN2B2	866.554	1.28472	0.0986	13.0296	8.30537e-39	2.89253e-37
GBA2	2420	1.28302	0.111647	11.4918	1.45125e-30	3.49852e-29
AMZ1	171.144	1.28132	0.173161	7.39959	1.36603e-13	1.06595e-12
SGCD	1003.89	1.28011	0.0985514	12.9893	1.40793e-38	4.86975e-37
RARB	158.845	1.27828	0.192257	6.64881	2.95479e-11	1.86557e-10
JAKMIP2	515.034	1.27665	0.110796	11.5224	1.01684e-30	2.48698e-29
CCDC24	103.781	1.27643	0.223003	5.72385	1.04138e-08	5.16081e-08
SLC22A18	552.737	1.27575	0.197664	6.45415	1.08825e-10	6.53513e-10
PRDX2	3211.53	1.27513	0.097221	13.1158	2.67423e-39	9.51082e-38
CD99L2	1405.39	1.27461	0.130585	9.76076	1.65911e-22	2.54078e-21
TRPM1	18144.2	1.27429	0.119305	10.6809	1.25007e-26	2.45387e-25
FGF14	171.426	1.2737	0.179782	7.08472	1.3933e-12	1.00141e-11
HOMEZ	424.534	1.27308	0.132104	9.63697	5.58096e-22	8.31096e-21
LPIN1	2354.43	1.27079	0.124386	10.2165	1.6723e-24	2.88879e-23
STXBP1	33592.5	1.26998	0.0809162	15.695	1.63719e-55	1.0354e-53
DDX53	53.3488	1.26966	0.283578	4.47728	7.55984e-06	2.59875e-05
EPHX2	77.0049	1.26935	0.278032	4.56546	4.98393e-06	1.75845e-05
C1orf233	83.5515	1.26916	0.313012	4.05467	5.0206e-05	0.000153368
HNMT	732.371	1.26873	0.127424	9.95673	2.35684e-23	3.78171e-22
PLXNA2	1413.21	1.26819	0.0895074	14.1685	1.43491e-45	6.36033e-44
PARVA	1733.29	1.26747	0.110224	11.499	1.33458e-30	3.2224e-29
CCDC92	426.986	1.26679	0.132908	9.53134	1.55261e-21	2.25002e-20
LMNA	6673.15	1.26632	0.0792227	15.9844	1.64242e-57	1.14931e-55
STARD5	134.169	1.26378	0.210837	5.99413	2.04576e-09	1.09033e-08
RAB5B	7010.36	1.26271	0.0869332	14.5251	8.40608e-48	3.93368e-46
FAM167B	187.338	1.26237	0.196446	6.42606	1.30956e-10	7.82988e-10
HADHB	6692.11	1.26201	0.0735329	17.1626	5.0621e-66	4.7821e-64
SIRT2	1365.38	1.26158	0.102646	12.2906	1.01689e-34	2.99617e-33
RRAGD	4393.16	1.2596	0.0780835	16.1314	1.53414e-58	1.13669e-56
SYP	827.558	1.25785	0.125155	10.0504	9.15171e-24	1.50848e-22
SLC2A8	68.9783	1.256	0.24548	5.11653	3.11209e-07	1.28495e-06
ZNF585B	34.2012	1.25461	0.337377	3.71872	0.000200234	0.000560366
TRPM4	182.895	1.25432	0.193622	6.47819	9.28283e-11	5.59673e-10
MAMLD1	41.1819	1.2518	0.310766	4.02813	5.62233e-05	0.000170509
MSRA	115.218	1.25156	0.19565	6.39695	1.58513e-10	9.39579e-10
EXOC6B	961.925	1.24948	0.0981281	12.7332	3.86626e-37	1.25405e-35
ENTPD5	512.283	1.24879	0.131785	9.47596	2.64306e-21	3.79752e-20
BACE1	356.275	1.24507	0.168437	7.39192	1.4472e-13	1.12755e-12
PDHA1	8800.22	1.24453	0.0792463	15.7045	1.40827e-55	8.94371e-54
SLC3A2	6990.44	1.24412	0.0778014	15.9909	1.47761e-57	1.0388e-55
PTK2B	64.5463	1.24301	0.281051	4.4227	9.74742e-06	3.30861e-05
BAG1	1203.45	1.24264	0.104848	11.8519	2.10449e-32	5.5129e-31
NT5M	110.783	1.24227	0.213529	5.81782	5.96202e-09	3.03013e-08
MIB2	995.374	1.24213	0.105359	11.7895	4.4203e-32	1.1421e-30
METRNL	1315.96	1.24029	0.114393	10.8424	2.16662e-27	4.4195e-26
ATP2A1	181.824	1.23885	0.185099	6.69288	2.18816e-11	1.40382e-10
PFKM	6139.97	1.23846	0.0885109	13.9922	1.7399e-44	7.42897e-43
USP35	971.51	1.23715	0.13725	9.01385	1.98945e-19	2.49134e-18
SFXN3	2106.29	1.23677	0.111374	11.1046	1.19137e-28	2.58358e-27
PAXIP1-AS2	153.802	1.23654	0.18162	6.80841	9.86834e-12	6.51354e-11
FAM53B	4759.11	1.23284	0.110935	11.1132	1.08236e-28	2.36074e-27
ATP5B	41925.3	1.22945	0.0682169	18.0226	1.29444e-72	1.5167e-70
RETSAT	2437.28	1.22857	0.0903602	13.5964	4.20621e-42	1.66432e-40
LYRM9	101.991	1.22812	0.232867	5.2739	1.33552e-07	5.77579e-07
HCG4	516.226	1.22575	0.152419	8.04199	8.83925e-16	8.29846e-15
AHCYL2	1380.98	1.22544	0.109689	11.1719	5.59676e-29	1.24771e-27
TMEM38A	225.282	1.22421	0.181679	6.73831	1.60239e-11	1.03637e-10
TMEM129	977.203	1.22417	0.158092	7.7434	9.67911e-15	8.38394e-14
RABEP2	310.313	1.22201	0.155972	7.83482	4.69518e-15	4.17211e-14
TTC39A	6484.33	1.2218	0.0958192	12.7511	3.07233e-37	9.98671e-36
C19orf12	1223.79	1.22163	0.113349	10.7776	4.39199e-27	8.80436e-26
GCSHP3	406.841	1.22069	0.14363	8.49883	1.91516e-17	2.03284e-16
TRIM63	3940	1.22044	0.0838216	14.5599	5.05014e-48	2.4004e-46
POLD4	315.337	1.21919	0.173618	7.02228	2.18274e-12	1.53289e-11
CYP27A1	2084.43	1.21835	0.100804	12.0863	1.24739e-33	3.52927e-32
CPTP	1119.34	1.21824	0.134884	9.03176	1.68937e-19	2.13323e-18
MAP1B	778.112	1.21431	0.130108	9.33308	1.02836e-20	1.42472e-19
SELPLG	84.3917	1.2141	0.220779	5.49919	3.81546e-08	1.77176e-07
DMXL2	6338.11	1.21215	0.112854	10.7409	6.53926e-27	1.29373e-25
ATG4D	775.841	1.21069	0.130464	9.27986	1.69702e-20	2.30048e-19
CHRNB1	83.4075	1.21061	0.26259	4.61026	4.02158e-06	1.43907e-05
ARMCX3	2536.11	1.20997	0.084441	14.3292	1.43763e-46	6.50594e-45
PDCD4-AS1	67.7002	1.20806	0.295095	4.09378	4.24396e-05	0.000131127
PCBP4	1924.46	1.2075	0.117555	10.2717	9.44761e-25	1.65854e-23
COL4A3BP	3006.33	1.2055	0.0895888	13.4559	2.84382e-41	1.08273e-39
FGFBP2	210.199	1.20461	0.161066	7.47901	7.48844e-14	6.02063e-13
HOXD3	34.4	1.20415	0.316306	3.80691	0.000140713	0.000402056
DNAJA4	55.2967	1.20345	0.282934	4.25347	2.10484e-05	6.79073e-05
MEGF8	6106.51	1.20279	0.126142	9.53514	1.4969e-21	2.17136e-20
SLC25A4	4778.34	1.19663	0.0850333	14.0725	5.6028e-45	2.42654e-43
RBM43	127.375	1.19617	0.211308	5.6608	1.50665e-08	7.33667e-08
TMPRSS5	108.892	1.19543	0.204318	5.85084	4.8911e-09	2.50777e-08
FAM222A	953.732	1.19462	0.141328	8.45282	2.84349e-17	2.97434e-16
FAM134A	3374.04	1.19013	0.0761419	15.6304	4.52084e-55	2.78908e-53
NDUFA8	1837.86	1.18688	0.0958034	12.3887	3.00908e-35	9.04219e-34
SH3BGR	137.866	1.18629	0.182969	6.48359	8.95678e-11	5.40446e-10
RALGDS	1881.27	1.18569	0.0874368	13.5605	6.86785e-42	2.68932e-40
FTH1	106556	1.18567	0.115664	10.251	1.17184e-24	2.04486e-23
HIBADH	2589.36	1.18457	0.105855	11.1905	4.53775e-29	1.01312e-27
NBEAL1	1467.48	1.18456	0.132222	8.95885	3.2807e-19	4.02825e-18
KCNAB2	14635.2	1.18346	0.120947	9.78498	1.30618e-22	2.00844e-21
VCL	7041.63	1.18329	0.0798572	14.8176	1.12809e-49	5.66483e-48
ZZEF1	2451.59	1.18273	0.0961667	12.2987	9.19951e-35	2.71583e-33
LINC01443	1108.49	1.18242	0.122366	9.66296	4.33166e-22	6.48248e-21
GRK4	32.7359	1.18153	0.342476	3.44997	0.000560657	0.00145084
PCYT2	1162.95	1.1815	0.0968066	12.2047	2.93233e-34	8.47459e-33
MAPT	557.304	1.1813	0.142969	8.26264	1.42484e-16	1.41594e-15
C11orf71	294.483	1.1796	0.161319	7.31223	2.6275e-13	2.00985e-12
RERG	108.266	1.17897	0.224866	5.243	1.57987e-07	6.77249e-07
FAM124A	1721.47	1.17833	0.0835102	14.11	3.29439e-45	1.43501e-43
ITFG3	2101.02	1.17514	0.0942435	12.4692	1.09968e-35	3.38527e-34
HOMER3	460.013	1.17082	0.18451	6.34556	2.21623e-10	1.29687e-09
HERC6	461.806	1.16759	0.13513	8.64048	5.59771e-18	6.24423e-17
LINC01502	79.8832	1.16663	0.26641	4.37908	1.19182e-05	3.98902e-05
ZZZ3	4785.1	1.16352	0.112713	10.3228	5.55555e-25	9.87908e-24
FAM161B	89.7646	1.16242	0.213504	5.44447	5.19602e-08	2.36417e-07
SLC25A12	1889.54	1.1623	0.0856061	13.5773	5.45706e-42	2.14243e-40
MROH1	534.959	1.16042	0.157337	7.37535	1.63914e-13	1.27185e-12
MYO16	1097.97	1.15897	0.0962238	12.0445	2.07231e-33	5.78982e-32
ZNF641	440.512	1.15791	0.120281	9.62672	6.16663e-22	9.12022e-21
FLYWCH1	1624.67	1.15716	0.0876725	13.1987	8.93086e-40	3.23717e-38
NSF	3317.29	1.15449	0.119432	9.66655	4.18249e-22	6.26545e-21
EHHADH	713.146	1.15443	0.127226	9.07379	1.14949e-19	1.47242e-18
PLCB2	46.8498	1.15406	0.286057	4.03438	5.47464e-05	0.00016633
PXMP4	109.552	1.15158	0.210259	5.47695	4.32709e-08	1.99524e-07
MYCBP2	8974.55	1.1514	0.110132	10.4546	1.39514e-25	2.56852e-24
NUCB1	7206.73	1.14898	0.0824064	13.9429	3.47572e-44	1.47572e-42
OPA3	1545.28	1.14867	0.0852854	13.4686	2.39395e-41	9.20725e-40
ADD1	7529.58	1.14845	0.0832943	13.7878	3.01627e-43	1.23219e-41
QRICH2	35.7658	1.14749	0.321711	3.56683	0.000361329	0.000966636
COL6A1	654.178	1.14737	0.165076	6.95058	3.63788e-12	2.49599e-11
COBL	728.917	1.14691	0.154877	7.4053	1.30851e-13	1.02318e-12
CTSD	13313.6	1.14625	0.0937772	12.2232	2.33826e-34	6.79669e-33
TTC3P1	117.083	1.14539	0.191778	5.97249	2.33663e-09	1.23663e-08
H6PD	1844.95	1.14455	0.288885	3.96197	7.43349e-05	0.000221612
KLHDC8B	223.159	1.1422	0.167543	6.81736	9.27281e-12	6.14461e-11
CORO2B	257.942	1.14072	0.144022	7.92047	2.36609e-15	2.14281e-14
MAT1A	39.4551	1.14059	0.329988	3.45646	0.000547321	0.00141827
RHBDL1	73.42	1.1401	0.24083	4.73404	2.20099e-06	8.14194e-06
PPP1R3F	281.402	1.1375	0.157541	7.22037	5.18456e-13	3.87868e-12
SIRPA	17419.9	1.13539	0.0912441	12.4434	1.51887e-35	4.59155e-34
NIPSNAP3A	349.583	1.13479	0.139144	8.15552	3.47686e-16	3.35586e-15
LINGO1	560.089	1.13475	0.126612	8.96241	3.1766e-19	3.90997e-18
TRIM68	455.698	1.13324	0.120414	9.41124	4.903e-21	6.95205e-20
SLC38A8	39.0627	1.13291	0.319582	3.54498	0.000392636	0.00104392
CCDC71L	578.746	1.13264	0.114862	9.86089	6.15022e-23	9.58356e-22
CPEB1	762.736	1.13101	0.100555	11.2477	2.37696e-29	5.39455e-28
TRPC1	476.246	1.13049	0.150168	7.52812	5.14747e-14	4.20562e-13
RAB27A	15143.7	1.1299	0.0852033	13.2613	3.88298e-40	1.43149e-38
MYO5A	15122.5	1.12929	0.0737604	15.3102	6.53476e-53	3.67185e-51
CTRL	114.683	1.12915	0.205274	5.5007	3.78285e-08	1.75769e-07
MTHFSD	295.423	1.12682	0.134952	8.3498	6.83809e-17	6.95075e-16
TNS3	960.676	1.12472	0.107906	10.4231	1.94435e-25	3.55367e-24
ZNF808	183.264	1.122	0.169803	6.60767	3.90428e-11	2.44058e-10
ARHGEF3	330.74	1.12062	0.131208	8.54077	1.33335e-17	1.44057e-16
ACAA1	1066.75	1.12057	0.0931643	12.0279	2.53631e-33	7.04712e-32
LOC171391	63.0899	1.11623	0.247897	4.5028	6.70635e-06	2.32066e-05
SLC25A20	375.489	1.11616	0.131051	8.517	1.63736e-17	1.75026e-16
PDK2	573.178	1.11479	0.145459	7.66392	1.80347e-14	1.53057e-13
SDC4	249.715	1.11298	0.15898	7.00074	2.54618e-12	1.77762e-11
JDP2	58.161	1.11276	0.299901	3.71043	0.000206909	0.000578084
NAT8	37.4827	1.11262	0.339546	3.27679	0.00104994	0.00258846
IKZF2	65.5103	1.11189	0.27014	4.11597	3.85549e-05	0.000119835
STON1	176.99	1.1106	0.425818	2.60815	0.00910341	0.0188078
PNRC1	693.862	1.11036	0.130945	8.47957	2.26035e-17	2.38584e-16
MDGA1	301.14	1.11024	0.165121	6.72381	1.7703e-11	1.14253e-10
COX5B	3193	1.11016	0.114791	9.67112	3.99979e-22	6.00366e-21
C9orf16	244.998	1.11016	0.168268	6.59755	4.18016e-11	2.60227e-10
GUCD1	3001.97	1.1073	0.0796724	13.8982	6.49844e-44	2.69846e-42
ETS1	19995.2	1.10685	0.0927879	11.9288	8.3761e-33	2.2608e-31
GBE1	1128.02	1.10589	0.105437	10.4886	9.74553e-26	1.80963e-24
ZBED3	117.501	1.1047	0.208476	5.29893	1.16482e-07	5.07239e-07
EPM2A	628.474	1.10461	0.11367	9.71772	2.53389e-22	3.86086e-21
IQCH-AS1	78.4404	1.10396	0.234454	4.70864	2.49371e-06	9.17313e-06
CABLES1	7540.75	1.10375	0.0835144	13.2163	7.06438e-40	2.57918e-38
MUL1	2326.63	1.10252	0.0860014	12.8198	1.27096e-37	4.23141e-36
TTPAL	1307.73	1.10213	0.101869	10.8191	2.79554e-27	5.67175e-26
OLFM1	94.9965	1.10156	0.226179	4.87031	1.11426e-06	4.29535e-06
KCTD2	1228.76	1.10095	0.0968162	11.3715	5.79697e-30	1.36269e-28
BTK	260.425	1.10078	0.138624	7.9408	2.00886e-15	1.83136e-14
OPLAH	236.545	1.09755	0.18192	6.03316	1.60781e-09	8.67621e-09
APOL2	1409.76	1.09534	0.0931395	11.7602	6.25986e-32	1.60641e-30
C1orf101	137.627	1.0928	0.18397	5.94009	2.8487e-09	1.49507e-08
PCTP	966.577	1.09219	0.100072	10.914	9.88118e-28	2.05825e-26
SLC31A2	265.408	1.092	0.141535	7.71543	1.20574e-14	1.03491e-13
LINC00511	46.0031	1.09155	0.288616	3.78201	0.000155565	0.000441489
BDH2	877.651	1.09137	0.12357	8.83201	1.02808e-18	1.21592e-17
CRYAB	37.7527	1.08936	0.310979	3.503	0.000460058	0.00120662
MAGED2	2590.26	1.08544	0.0906867	11.9691	5.15634e-33	1.40198e-31
FGF11	81.8321	1.08472	0.230713	4.70159	2.5814e-06	9.47727e-06
VAMP2	651.551	1.08441	0.144624	7.49811	6.47427e-14	5.23868e-13
RPS6KC1	4380.14	1.08269	0.0785685	13.7802	3.35548e-43	1.36339e-41
AGPAT3	4211.39	1.08197	0.0886308	12.2076	2.83028e-34	8.19535e-33
HOXB13	177.93	1.08168	0.176882	6.11527	9.63936e-10	5.30007e-09
MDH1	15052.8	1.08057	0.0765595	14.1142	3.10603e-45	1.35687e-43
OTUD7B	5105.89	1.07864	0.0775981	13.9003	6.30553e-44	2.62557e-42
C5orf24	3345.84	1.0785	0.0961249	11.2197	3.26216e-29	7.37034e-28
ZNF528	124.392	1.07838	0.197015	5.4736	4.40982e-08	2.03029e-07
TMEM9B	775.933	1.07789	0.11545	9.33637	9.96972e-21	1.38504e-19
MYOM2	59.7948	1.07783	0.262373	4.10799	3.99124e-05	0.000123774
RTFDC1	18784.6	1.07723	0.0851476	12.6514	1.09948e-36	3.484e-35
GRHPR	2524.42	1.07694	0.0928981	11.5927	4.48832e-31	1.10851e-29
MLPH	8048.19	1.07671	0.116672	9.22848	2.74503e-20	3.64597e-19
PGM1	4175.44	1.07574	0.0801686	13.4185	4.71336e-41	1.78552e-39
ZNF536	571.411	1.07542	0.126717	8.48683	2.12354e-17	2.24613e-16
PBLD	215.837	1.07432	0.1513	7.10058	1.24236e-12	8.98915e-12
KRTAP19-1	622.355	1.07428	0.120495	8.91549	4.85673e-19	5.91535e-18
TPRN	782.684	1.0741	0.102721	10.4566	1.36716e-25	2.52007e-24
EFR3A	3033.62	1.07364	0.105879	10.1403	3.66131e-24	6.19717e-23
TBX3	4120.57	1.07291	0.103639	10.3524	4.08257e-25	7.36373e-24
CAV2	1293.03	1.07272	0.0964398	11.1233	9.66835e-29	2.121e-27
ZFYVE1	893.141	1.07131	0.121857	8.79147	1.47612e-18	1.72656e-17
MTHFR	1356.56	1.07072	0.114716	9.33369	1.02244e-20	1.41912e-19
CCDC159	63.2923	1.07031	0.289996	3.69077	0.000223579	0.00062144
DNAJC4	605.748	1.06885	0.136835	7.81126	5.6619e-15	4.99007e-14
LANCL2	744.746	1.06793	0.130848	8.16166	3.30461e-16	3.20187e-15
IL11RA	247.418	1.06743	0.167889	6.35799	2.04414e-10	1.20082e-09
CFLAR	994.02	1.06705	0.0973499	10.9609	5.8879e-28	1.23949e-26
SLC39A13	960.307	1.06685	0.125375	8.50928	1.75015e-17	1.86424e-16
SLC25A42	138.296	1.06678	0.265062	4.02466	5.70578e-05	0.000172866
HOGA1	138.106	1.06618	0.217489	4.90222	9.47599e-07	3.68958e-06
NRIP3	155.923	1.06557	0.219343	4.85803	1.18558e-06	4.55632e-06
ATP5A1	15232.9	1.06434	0.0708364	15.0253	5.016e-51	2.62342e-49
LOC642361	101.7	1.0636	0.233912	4.54704	5.44066e-06	1.90713e-05
ZNF440	883.882	1.06346	0.100384	10.5939	3.18002e-26	6.10749e-25
BTBD10	6942.42	1.06327	0.0974656	10.9092	1.04161e-27	2.16264e-26
BHLHE41	13448.4	1.06299	0.0706427	15.0474	3.58858e-51	1.88995e-49
TOLLIP	1926.87	1.06187	0.0998152	10.6384	1.97531e-26	3.83271e-25
ATP6V0E2	1322.39	1.05773	0.0983757	10.752	5.80038e-27	1.15511e-25
NUDT14	171.544	1.05645	0.189166	5.58477	2.34016e-08	1.11336e-07
PNMA1	1543.04	1.05402	0.112854	9.33975	9.65642e-21	1.34522e-19
ZDBF2	1479.53	1.053	0.101789	10.3449	4.41158e-25	7.92877e-24
ANO4	653.827	1.05298	0.109625	9.60532	7.59251e-22	1.11744e-20
LATS2	2258.79	1.05257	0.0871506	12.0776	1.38722e-33	3.89735e-32
ZNF862	84.1732	1.05248	0.240586	4.37463	1.21641e-05	4.06412e-05
GALNTL6	177.733	1.04847	0.172497	6.0782	1.21539e-09	6.62243e-09
LOC550113	307.914	1.04767	0.152658	6.86289	6.74804e-12	4.52113e-11
NUDT8	95.5707	1.04507	0.237661	4.39729	1.09609e-05	3.68986e-05
NUDT7	32.2402	1.04421	0.329377	3.17025	0.00152309	0.00366205
GDPGP1	62.2205	1.0441	0.272186	3.83598	0.000125062	0.000359874
PSKH1	691.478	1.04401	0.122598	8.51569	1.65605e-17	1.76774e-16
LZTS1	3920.15	1.04376	0.0985281	10.5935	3.1937e-26	6.12598e-25
IFT27	173.472	1.04292	0.170124	6.13032	8.77024e-10	4.84157e-09
NDUFA6-AS1	34.8914	1.0429	0.322833	3.23046	0.00123591	0.00301061
GUF1	3886.06	1.0428	0.0976769	10.676	1.31786e-26	2.5769e-25
PMEL	155867	1.04278	0.0905655	11.5141	1.12055e-30	2.72301e-29
SAMM50	8308.93	1.042	0.078687	13.2424	4.99478e-40	1.83243e-38
CHAC1	441.318	1.04168	0.388248	2.68301	0.00729622	0.0153747
PCDHGB4	56.5877	1.0416	0.270908	3.84486	0.000120619	0.000347931
HYAL1	43.168	1.04087	0.28955	3.59481	0.000324633	0.000876218
TM7SF2	287.246	1.04019	0.157545	6.60251	4.04253e-11	2.52243e-10
LIMD1	526.633	1.04014	0.118887	8.74894	2.15371e-18	2.4896e-17
RNF144B	2461.48	1.03961	0.0967633	10.7439	6.33294e-27	1.2562e-25
NAV3	327.609	1.03939	0.135661	7.66165	1.83554e-14	1.55692e-13
ELOVL7	106.777	1.03917	0.212369	4.89325	9.91856e-07	3.84605e-06
MARCH2	130.103	1.03834	0.240563	4.31628	1.58677e-05	5.22415e-05
ZMAT3	2311.86	1.03821	0.0933306	11.124	9.58924e-29	2.10671e-27
GALNT3	6313.58	1.03787	0.139026	7.46528	8.31245e-14	6.65833e-13
TPK1	51.6873	1.03654	0.272532	3.80338	0.000142733	0.000407442
TCTA	487.813	1.03646	0.13711	7.55929	4.05275e-14	3.33827e-13
MGST3	1862.88	1.03625	0.0907475	11.419	3.35996e-30	7.9852e-29
ARVCF	350.809	1.03555	0.176542	5.86577	4.47053e-09	2.30072e-08
GABARAP	5037.68	1.03551	0.0810681	12.7733	2.31135e-37	7.59481e-36
HERC1	9674.31	1.03516	0.102542	10.095	5.81397e-24	9.71029e-23
ATP9A	563.146	1.03514	0.117523	8.80803	1.27359e-18	1.49459e-17
AAED1	358.444	1.03501	0.126038	8.21188	2.17748e-16	2.13997e-15
MAMSTR	77.3717	1.03473	0.251631	4.1121	3.92075e-05	0.000121713
SLC16A4	322.014	1.03445	0.146873	7.04314	1.87961e-12	1.32821e-11
SLC25A11	2358.03	1.03398	0.08555	12.0862	1.2492e-33	3.52927e-32
MAPK4	1162.15	1.03313	0.136714	7.55689	4.1282e-14	3.39487e-13
SH3BP4	13754.7	1.03262	0.0851558	12.1263	7.66492e-34	2.18595e-32
ID2	587.399	1.0322	0.144458	7.14531	8.97959e-13	6.58547e-12
PYGL	9474.2	1.03123	0.109847	9.38788	6.12225e-21	8.63225e-20
C21orf2	108.431	1.03034	0.202269	5.09391	3.50746e-07	1.44063e-06
LGALS1	258.229	1.02963	0.169375	6.07899	1.20945e-09	6.59243e-09
ATP1B1	721.328	1.02835	0.109091	9.42655	4.23806e-21	6.02618e-20
SLC2A11	240.939	1.02768	0.172239	5.96658	2.42271e-09	1.2804e-08
MRPL41	440.088	1.0276	0.13953	7.36473	1.7751e-13	1.37452e-12
FER	1892.26	1.0276	0.0951811	10.7962	3.5858e-27	7.20737e-26
NDUFS1	11888.7	1.02668	0.0888368	11.557	6.80784e-31	1.67318e-29
GHITM	12247.7	1.02602	0.0975864	10.514	7.44975e-26	1.39016e-24
GSTO2	87.0947	1.02531	0.222118	4.61607	3.91079e-06	1.40241e-05
CTSF	1582.42	1.02367	0.134837	7.59192	3.15201e-14	2.61917e-13
ZKSCAN2	1821.4	1.02295	0.108095	9.46349	2.97842e-21	4.26314e-20
TLN2	1608.72	1.02227	0.106399	9.60798	7.3985e-22	1.08994e-20
TOB1	2952.71	1.02219	0.0994847	10.2748	9.15148e-25	1.60843e-23
FYCO1	3269.53	1.02216	0.092403	11.062	1.91755e-28	4.12873e-27
JAK2	1021.17	1.02183	0.0988384	10.3384	4.72514e-25	8.45213e-24
CAP2	6827.26	1.02034	0.0937104	10.8882	1.31183e-27	2.70509e-26
TPRG1L	927.164	1.01917	0.112613	9.05023	1.42667e-19	1.81516e-18
TCAIM	1104.78	1.0188	0.114401	8.90551	5.31388e-19	6.45135e-18
TRAPPC9	631.471	1.0176	0.113584	8.95905	3.27486e-19	4.02435e-18
RABGAP1L	1127.71	1.01466	0.110366	9.1936	3.7991e-20	4.99334e-19
ZNF329	174.891	1.0144	0.17977	5.64274	1.67363e-08	8.1132e-08
IRAK4	529.341	1.01425	0.11583	8.75638	2.01616e-18	2.3352e-17
FAM13B	2013.21	1.01247	0.152621	6.63386	3.27029e-11	2.05703e-10
BRPF3	1641.11	1.01215	0.156638	6.4617	1.03536e-10	6.22988e-10
BBS1	887.197	1.01157	0.125498	8.06043	7.60243e-16	7.19091e-15
SLC29A3	95.0191	1.01057	0.212333	4.75935	1.94215e-06	7.2251e-06
TMEM167B	1563.16	1.00916	0.0930259	10.8482	2.03501e-27	4.15665e-26
RABAC1	292.967	1.00821	0.197028	5.11708	3.10307e-07	1.28185e-06
PHYH	479.692	1.00764	0.122312	8.23826	1.74738e-16	1.724e-15
CS	11701.4	1.00655	0.0735037	13.6939	1.1036e-42	4.41295e-41
RIPK1	2117.38	1.00571	0.114109	8.81356	1.21236e-18	1.42606e-17
SPTLC2	2146.45	1.00544	0.0951958	10.5618	4.47969e-26	8.48502e-25
TMEM127	2883.8	1.00513	0.0955962	10.5144	7.419e-26	1.38613e-24
PARP3	625.987	1.00352	0.11462	8.75519	2.0376e-18	2.35821e-17
LYRM5	571.574	1.00267	0.111579	8.98619	2.55953e-19	3.1659e-18
RRAGC	3261.95	1.00208	0.0843394	11.8815	1.47741e-32	3.91773e-31
RAP1GAP	967.418	1.00057	0.120985	8.27019	1.3375e-16	1.33441e-15
PDE4DIP	2099.5	0.999255	0.0948712	10.5328	6.10195e-26	1.1443e-24
CLCN7	9516.26	0.998622	0.10682	9.34861	8.88037e-21	1.23825e-19
TUBB4A	28155	0.998404	0.132912	7.51175	5.83423e-14	4.75131e-13
CBY1	629.051	0.99835	0.110096	9.06802	1.21196e-19	1.54589e-18
DLG3	35.9327	0.99623	0.312019	3.19285	0.00140875	0.00340473
PCYT1B	112.156	0.995674	0.212911	4.67647	2.9185e-06	1.06605e-05
C7orf31	812.656	0.995303	0.112606	8.83879	9.67621e-19	1.14891e-17
FBXO44	1067.84	0.995175	0.130385	7.63256	2.30135e-14	1.93251e-13
CTNS	2096.71	0.995015	0.0877267	11.3422	8.10658e-30	1.888e-28
PHACTR1	2648.87	0.994927	0.0828876	12.0033	3.41302e-33	9.36257e-32
TEKT4P2	136.115	0.99415	0.18971	5.24036	1.60261e-07	6.86021e-07
GM2A	3365.36	0.993109	0.110351	8.99956	2.26622e-19	2.8239e-18
SHROOM4	456.459	0.992967	0.123429	8.04484	8.63593e-16	8.11767e-15
NDUFA6	2979.21	0.992916	0.0859572	11.5513	7.27308e-31	1.78462e-29
ASRGL1	616.279	0.992848	0.110013	9.02481	1.80008e-19	2.26546e-18
TNS1	204.719	0.992499	0.165094	6.01172	1.83565e-09	9.83546e-09
COX6A1	1193.87	0.991455	0.101434	9.77441	1.44996e-22	2.22499e-21
RAPGEF1	3181.27	0.991262	0.0843809	11.7475	7.27624e-32	1.85778e-30
CYB5R1	1377.75	0.989144	0.128755	7.68238	1.5616e-14	1.32978e-13
MRPL15	2591.24	0.988954	0.107564	9.19412	3.7807e-20	4.97347e-19
UGDH-AS1	40.1982	0.988864	0.315739	3.1319	0.00173678	0.00413603
NCOA1	2226.23	0.988251	0.0926913	10.6617	1.53694e-26	3.00141e-25
MICAL1	14284.8	0.988153	0.111855	8.8342	1.0082e-18	1.19428e-17
C5orf42	2560.61	0.987633	0.0982292	10.0544	8.78819e-24	1.45053e-22
RALGPS2	2193.51	0.987505	0.113718	8.6838	3.82751e-18	4.34983e-17
CDIP1	2465.26	0.986854	0.0830784	11.8786	1.52945e-32	4.04156e-31
ZNF549	743.226	0.982549	0.109206	8.99723	2.31492e-19	2.87275e-18
TMEM136	335.631	0.980235	0.14786	6.6295	3.36829e-11	2.11603e-10
HLF	49.7405	0.979748	0.277388	3.53205	0.000412344	0.00109228
HK1	13052.4	0.979601	0.0850491	11.5181	1.06984e-30	2.60948e-29
PRICKLE3	1348.67	0.979485	0.108675	9.01295	2.00589e-19	2.50778e-18
ZBED6	649.376	0.979231	0.140753	6.9571	3.47337e-12	2.38853e-11
PI4KB	4609.02	0.979092	0.0813228	12.0396	2.2007e-33	6.1372e-32
ZBTB4	1590.2	0.978169	0.100922	9.69229	3.25146e-22	4.91458e-21
PYGB	6909.57	0.976674	0.0944836	10.337	4.79442e-25	8.56592e-24
PCBD2	73.2835	0.976578	0.249447	3.91498	9.04132e-05	0.000266059
PTGES2	2107.12	0.976359	0.0904215	10.7979	3.52295e-27	7.09047e-26
MIPEP	1524.04	0.975324	0.0896289	10.8818	1.40751e-27	2.89056e-26
REEP6	152.594	0.975297	0.206847	4.71506	2.41636e-06	8.90594e-06
CCSER1	253.747	0.974905	0.158265	6.15997	7.27601e-10	4.05071e-09
SNX6	6435.4	0.973817	0.0965731	10.0837	6.52047e-24	1.08543e-22
HIGD1A	4610.87	0.973409	0.0953426	10.2096	1.79603e-24	3.09544e-23
SCPEP1	1682.45	0.973396	0.118837	8.19103	2.58996e-16	2.53217e-15
SYT14	2519.76	0.973271	0.10972	8.87053	7.27954e-19	8.73949e-18
DLD	8590.76	0.972741	0.110862	8.77438	1.71854e-18	2.00121e-17
PKI55	223.745	0.972501	0.246853	3.9396	8.16182e-05	0.000241846
ALDH1B1	2469.07	0.972076	0.0955769	10.1706	2.68201e-24	4.56516e-23
SLC35C1	558.015	0.971872	0.114071	8.51988	1.59717e-17	1.70972e-16
PRKG1	282.22	0.971845	0.170684	5.69383	1.24221e-08	6.11796e-08
EGLN3	85.7507	0.969997	0.221645	4.37636	1.20677e-05	4.03279e-05
MACROD2	115.491	0.969969	0.217519	4.45925	8.22481e-06	2.81263e-05
COPA	16010.9	0.969718	0.0755652	12.8329	1.07332e-37	3.59716e-36
ZKSCAN1	6649.81	0.968929	0.136898	7.07775	1.46514e-12	1.05155e-11
NDRG1	225.396	0.968703	0.177964	5.44324	5.23188e-08	2.37834e-07
CHD5	42.5719	0.968646	0.327414	2.95848	0.00309164	0.00702075
SERF2	2591.88	0.966907	0.0954412	10.1309	4.0286e-24	6.79602e-23
HCCS	1867.42	0.966675	0.0910079	10.6219	2.35763e-26	4.55116e-25
BAAT	16810.5	0.966451	0.0889604	10.8638	1.71412e-27	3.51069e-26
SPTBN2	1796.18	0.966272	0.109403	8.83222	1.02619e-18	1.21463e-17
LPPR2	641.724	0.96625	0.139938	6.90484	5.026e-12	3.40663e-11
SIRT4	34.2702	0.965953	0.322193	2.99806	0.00271706	0.00623098
FICD	99.049	0.965077	0.21338	4.5228	6.10261e-06	2.12654e-05
LURAP1	366.5	0.964343	0.160728	5.99986	1.9749e-09	1.0533e-08
ADCY2	2579.96	0.963929	0.0937003	10.2874	8.03489e-25	1.41878e-23
LRSAM1	497.218	0.963844	0.146477	6.58018	4.69886e-11	2.91079e-10
CLEC16A	3110.16	0.963355	0.0819993	11.7483	7.20335e-32	1.84228e-30
CASD1	277.843	0.961854	0.160574	5.99008	2.09738e-09	1.11745e-08
MCF2L	2654.73	0.961173	0.0808985	11.8812	1.4818e-32	3.9225e-31
LINC00969	116.297	0.960849	0.191069	5.02881	4.93539e-07	1.99208e-06
BET1L	1559.33	0.959939	0.0987011	9.72572	2.34247e-22	3.5728e-21
TMCC3	490.095	0.959384	0.157266	6.1004	1.05806e-09	5.79652e-09
NRBP2	1018.76	0.958633	0.13764	6.96478	3.28919e-12	2.26898e-11
OSBPL1A	4634.91	0.957481	0.0840708	11.389	4.74505e-30	1.1224e-28
ANK3	2020.21	0.957471	0.094999	10.0787	6.85938e-24	1.14059e-22
LPP	3690.94	0.956771	0.103621	9.23338	2.62235e-20	3.48609e-19
FAHD1	1327.64	0.956397	0.101154	9.45486	3.23446e-21	4.62087e-20
HDAC11	382.564	0.956375	0.154839	6.17658	6.55035e-10	3.67026e-09
ESRRA	1646.04	0.955802	0.112228	8.51663	1.64259e-17	1.75461e-16
NKIRAS2	2920.16	0.954698	0.0771049	12.3818	3.27872e-35	9.81342e-34
ACADM	5644.02	0.952479	0.10437	9.12596	7.11053e-20	9.20957e-19
ZNF527	190.393	0.952392	0.160257	5.94292	2.79993e-09	1.4705e-08
EPHA3	6405.8	0.951872	0.0780407	12.1971	3.22014e-34	9.28862e-33
ERMAP	37.2067	0.951651	0.315816	3.01331	0.00258414	0.00595143
ST3GAL3	204.916	0.951458	0.179027	5.3146	1.06889e-07	4.68705e-07
NDUFB5	6171.5	0.95118	0.0770125	12.351	4.81238e-35	1.43187e-33
BAK1	857.755	0.951065	0.0968788	9.81707	9.50711e-23	1.47234e-21
PCYT1A	2164.83	0.951007	0.0946324	10.0495	9.23496e-24	1.52055e-22
HHLA3	147.33	0.948971	0.199007	4.76852	1.85582e-06	6.92781e-06
SEMA6A	12370.4	0.948647	0.0946328	10.0245	1.18952e-23	1.93955e-22
ZNF605	477.502	0.94856	0.123815	7.66109	1.84364e-14	1.5629e-13
BOLA3-AS1	151.73	0.94849	0.17334	5.47184	4.45383e-08	2.04868e-07
FAM63B	3598.9	0.948059	0.0929067	10.2044	1.89441e-24	3.25386e-23
C8orf46	175.726	0.947519	0.178039	5.32199	1.02638e-07	4.50588e-07
WWTR1-AS1	38.9346	0.947211	0.317696	2.9815	0.00286843	0.00654929
ITGA3	104.719	0.946468	0.227279	4.16435	3.12242e-05	9.82827e-05
ISPD	156.431	0.945789	0.183264	5.1608	2.45892e-07	1.02898e-06
VAX2	41.4595	0.945342	0.311328	3.03648	0.00239358	0.00555488
REPS2	393.209	0.945243	0.150114	6.29683	3.038e-10	1.75533e-09
CALCOCO1	1165.29	0.944747	0.13724	6.88389	5.82388e-12	3.92106e-11
MAP3K11	3788	0.944196	0.0811928	11.6291	2.9331e-31	7.30376e-30
ZNF181	421.885	0.944141	0.13677	6.90311	5.08767e-12	3.44689e-11
LRRC41	2685.6	0.943446	0.0950574	9.925	3.24087e-23	5.16182e-22
AZIN2	125.065	0.943029	0.207845	4.53717	5.70143e-06	1.99438e-05
ATP6V0A4	942.078	0.94301	0.121521	7.76006	8.48914e-15	7.38707e-14
PCDHGA8	48.5954	0.942906	0.286245	3.29405	0.000987535	0.00244458
NAGK	754.157	0.942791	0.118522	7.95456	1.79773e-15	1.64783e-14
ZKSCAN3	482.573	0.942422	0.141872	6.64278	3.0782e-11	1.94186e-10
COQ9	2582.5	0.94202	0.0835468	11.2754	1.73654e-29	3.96492e-28
UQCC1	2589.71	0.941979	0.0808649	11.6488	2.32715e-31	5.81402e-30
ADAMTS17	178.596	0.941256	0.218674	4.30439	1.67449e-05	5.49023e-05
CES3	65.7264	0.940777	0.262472	3.58429	0.000337998	0.000909855
COPG1	8847.68	0.940292	0.0776416	12.1107	9.27181e-34	2.63923e-32
LINC00476	429.519	0.940104	0.133197	7.05799	1.68932e-12	1.20274e-11
PIGV	180.961	0.939879	0.173621	5.41339	6.18418e-08	2.78943e-07
LDOC1	48.3795	0.939638	0.282606	3.3249	0.000884496	0.00220868
PPP1R3D	484.621	0.939592	0.121605	7.72662	1.10437e-14	9.52229e-14
OBSL1	1172.71	0.938964	0.111271	8.43852	3.21392e-17	3.34332e-16
ACP2	1262.78	0.938563	0.0934417	10.0444	9.72673e-24	1.5963e-22
SLC25A23	5362.47	0.938034	0.0803752	11.6707	1.79938e-31	4.50291e-30
ZNF10	177.185	0.93801	0.205161	4.57206	4.82949e-06	1.70635e-05
YPEL5	1003.18	0.936539	0.155093	6.03855	1.55505e-09	8.4065e-09
LOC100506746	68.0383	0.936474	0.256132	3.65622	0.00025596	0.000703936
AP5B1	3573.15	0.935854	0.083601	11.1943	4.34848e-29	9.72297e-28
CIRBP-AS1	75.0707	0.935739	0.244053	3.83416	0.000125994	0.00036233
EHD1	1154.59	0.935052	0.103046	9.0741	1.14621e-19	1.46946e-18
NMRK2	107.831	0.933214	0.295211	3.16118	0.00157134	0.00376936
LOC728989	39.9586	0.932517	0.303943	3.06807	0.00215446	0.00504487
C3orf18	177.877	0.932202	0.197874	4.71109	2.46392e-06	9.07459e-06
CIC	2148.15	0.932139	0.0878113	10.6152	2.53137e-26	4.87409e-25
KIAA0141	1328.81	0.932114	0.100678	9.25841	2.07497e-20	2.78784e-19
CHIC1	906.737	0.93202	0.123874	7.52391	5.3161e-14	4.34105e-13
AOC2	262.962	0.930774	0.150684	6.17699	6.53362e-10	3.66304e-09
DCLK1	491.182	0.930301	0.11255	8.26565	1.38936e-16	1.38341e-15
STOX2	886.374	0.930191	0.119949	7.75491	8.84055e-15	7.6796e-14
DCTN5	6822.48	0.929937	0.0902178	10.3077	6.50452e-25	1.15394e-23
NDUFS7	1105.33	0.92992	0.115814	8.02942	9.79378e-16	9.17749e-15
NOL4L	4489.1	0.929771	0.0890858	10.4368	1.6839e-25	3.08886e-24
CUL7	1855.06	0.929738	0.105755	8.79141	1.47697e-18	1.72656e-17
TMOD2	254.129	0.929447	0.183903	5.05401	4.32639e-07	1.75978e-06
NLRX1	314.498	0.929332	0.139958	6.64005	3.13572e-11	1.97568e-10
KIAA1211	3392.47	0.928864	0.0993205	9.35219	8.58539e-21	1.20156e-19
PPP1R3B	758.699	0.928786	0.135453	6.85688	7.03784e-12	4.71111e-11
ZDHHC24	88.4199	0.928575	0.273617	3.3937	0.000689548	0.00175848
LOC100233156	79.2101	0.927927	0.231387	4.01028	6.06468e-05	0.000183079
MTMR10	1307.93	0.927473	0.0986956	9.39731	5.5976e-21	7.90727e-20
SLC7A11	4528.33	0.927214	0.118556	7.82091	5.24432e-15	4.63555e-14
ARHGAP39	307.955	0.926297	0.154966	5.97742	2.26699e-09	1.20272e-08
TK2	424.762	0.925345	0.125995	7.34431	2.06821e-13	1.59333e-12
PEX11B	381.762	0.924334	0.137393	6.72768	1.72388e-11	1.11353e-10
TRIM4	551.214	0.923806	0.136571	6.76429	1.33963e-11	8.69407e-11
HINT3	1782.17	0.923391	0.0864643	10.6795	1.27021e-26	2.49018e-25
GPI	15391.8	0.922945	0.068885	13.3984	6.18218e-41	2.33027e-39
SERINC2	385.551	0.922646	0.172214	5.35756	8.43514e-08	3.74221e-07
CNEP1R1	423.398	0.922502	0.123242	7.48527	7.14011e-14	5.74668e-13
MTMR11	86.6763	0.921137	0.237424	3.87972	0.000104579	0.000305215
CLYBL	291.69	0.920724	0.184768	4.98315	6.25584e-07	2.489e-06
ATF5	331.369	0.920061	0.22438	4.10045	4.1234e-05	0.000127637
TCEA2	63.4756	0.920006	0.263219	3.49521	0.000473685	0.00124
MLYCD	167.828	0.91962	0.20867	4.40705	1.04786e-05	3.53772e-05
UQCRC2	10071	0.918708	0.0709852	12.9423	2.59886e-38	8.92768e-37
UQCRB	11326.3	0.91818	0.107128	8.57088	1.02694e-17	1.12154e-16
IL10RB	614.246	0.918046	0.127147	7.22033	5.18611e-13	3.87868e-12
CCDC115	511.534	0.917844	0.122461	7.495	6.62999e-14	5.36181e-13
HMBOX1	606.382	0.917692	0.120477	7.61713	2.59372e-14	2.17077e-13
CPM	101.884	0.917377	0.234329	3.9149	9.04409e-05	0.000266059
AP2A2	2293.25	0.917143	0.0809769	11.326	9.75852e-30	2.25881e-28
TUFT1	380.216	0.917098	0.133999	6.84408	7.69677e-12	5.14082e-11
MXD1	301.781	0.916301	0.174141	5.26185	1.42616e-07	6.14319e-07
LINC00052	148.913	0.916159	0.194851	4.70185	2.57817e-06	9.4677e-06
SCD5	1588.22	0.915819	0.100956	9.07143	1.17469e-19	1.50343e-18
ATP10A	3373.91	0.915694	0.0992426	9.22682	2.78796e-20	3.69973e-19
FAM69B	5069.12	0.914838	0.110563	8.27438	1.29129e-16	1.29001e-15
PLS3	6446.16	0.914377	0.102966	8.88036	6.66436e-19	8.01367e-18
ABHD6	1359.59	0.914366	0.105065	8.70287	3.23587e-18	3.70532e-17
TP53TG1	66.8624	0.91413	0.262524	3.48209	0.000497524	0.00129813
AAK1	3279.86	0.913963	0.085077	10.7428	6.40876e-27	1.26957e-25
CITED2	1014.39	0.913803	0.120045	7.61217	2.69524e-14	2.25324e-13
TRAPPC6A	57.7722	0.913754	0.314042	2.90965	0.00361833	0.00810015
UFL1	2620.4	0.912941	0.116225	7.85494	3.99974e-15	3.56463e-14
POM121	3100.49	0.911488	0.0981217	9.28937	1.5521e-20	2.10593e-19
PNPLA8	1717.68	0.909888	0.0917038	9.92204	3.33874e-23	5.30095e-22
SAP30L	410.404	0.909361	0.122581	7.41843	1.18515e-13	9.33e-13
PSAT1	1726.24	0.909118	0.123868	7.33941	2.14532e-13	1.6502e-12
ACACB	1124.45	0.908502	0.158076	5.74726	9.07017e-09	4.52162e-08
SLC16A7	5332.56	0.908028	0.0914508	9.92914	3.1092e-23	4.95733e-22
LOC400043	306.595	0.906975	0.157165	5.77085	7.88718e-09	3.96589e-08
ACAD8	527.511	0.906536	0.114284	7.93231	2.15101e-15	1.95388e-14
FAM120C	448.726	0.906184	0.127021	7.13412	9.7408e-13	7.11611e-12
CTSA	7060.2	0.905821	0.0754768	12.0013	3.49692e-33	9.57534e-32
ANKIB1	3682.14	0.905582	0.077031	11.7561	6.57283e-32	1.68387e-30
VPS18	3320	0.905477	0.0763759	11.8555	2.01443e-32	5.28614e-31
PCBD1	675.651	0.903652	0.106028	8.52275	1.55808e-17	1.67024e-16
NCALD	3082.82	0.903525	0.0835428	10.8151	2.91934e-27	5.90707e-26
AP5S1	639.906	0.903434	0.112325	8.04304	8.76385e-16	8.23279e-15
SDHD	2683.95	0.903427	0.0815661	11.076	1.64022e-28	3.53665e-27
ISCA1	1098.7	0.903158	0.124004	7.28329	3.25782e-13	2.47571e-12
CYC1	3356.07	0.903149	0.0971202	9.29929	1.41388e-20	1.92184e-19
STARD7-AS1	149.148	0.902359	0.172114	5.24279	1.58166e-07	6.77822e-07
SLC35F5	2388.57	0.90194	0.0853277	10.5703	4.09171e-26	7.7892e-25
LURAP1L-AS1	97.8568	0.901008	0.235206	3.83073	0.000127766	0.000367075
ALDH4A1	507.271	0.900342	0.122852	7.32865	2.32478e-13	1.78461e-12
PNPLA4	759.86	0.89987	0.0995975	9.03506	1.63911e-19	2.0715e-18
USP20	990.067	0.899605	0.127976	7.02948	2.073e-12	1.45829e-11
CHST12	321.541	0.899371	0.142223	6.32365	2.55453e-10	1.4885e-09
AP2M1	11658.8	0.899225	0.0854668	10.5213	6.88915e-26	1.29033e-24
EXOC1	2571.65	0.899146	0.0838821	10.7192	8.27493e-27	1.63284e-25
FAM214A	724.015	0.898332	0.170952	5.25487	1.48131e-07	6.36804e-07
IFNGR1	1452.51	0.898111	0.0842482	10.6603	1.56091e-26	3.04428e-25
TMEM143	328.281	0.897604	0.148552	6.04235	1.51884e-09	8.22252e-09
GLUL	23333.6	0.896984	0.0754841	11.8831	1.4493e-32	3.84995e-31
COX8A	3016.83	0.896122	0.0866561	10.3411	4.59104e-25	8.22198e-24
CES2	1539.72	0.895947	0.0984831	9.09747	9.24625e-20	1.19145e-18
PEBP1	11144.9	0.895876	0.0741923	12.075	1.43086e-33	4.01251e-32
PNKD	1261.11	0.89538	0.112765	7.94024	2.01787e-15	1.83735e-14
RGL1	2501.09	0.895098	0.0873286	10.2498	1.18624e-24	2.06566e-23
TLN1	12602.3	0.894036	0.087457	10.2226	1.5709e-24	2.71983e-23
TLR1	40.2016	0.89319	0.303105	2.9468	0.00321076	0.00726616
ABHD15	721.532	0.892996	0.101747	8.77667	1.68381e-18	1.96228e-17
GOLGA1	1540.12	0.892447	0.0889671	10.0312	1.11152e-23	1.81825e-22
ZNF552	404.158	0.892049	0.127345	7.00499	2.47004e-12	1.72846e-11
AKAP6	189.623	0.891979	0.182435	4.88931	1.01191e-06	3.91927e-06
LETMD1	1324.58	0.891863	0.120453	7.40425	1.31897e-13	1.03029e-12
CHURC1	1042.28	0.891371	0.102015	8.73765	2.38007e-18	2.74616e-17
STAM2	1429.71	0.891163	0.114507	7.78259	7.10571e-15	6.22264e-14
PITX2	131.498	0.890535	0.184175	4.83526	1.3297e-06	5.07281e-06
UQCRC1	8047.32	0.890448	0.0965702	9.22073	2.95075e-20	3.90206e-19
TNKS	4344.01	0.890152	0.0997829	8.92089	4.6254e-19	5.64268e-18
TWF2	1066.92	0.890149	0.104034	8.55636	1.16486e-17	1.26759e-16
SORD	1799.64	0.889841	0.0923443	9.63612	5.62749e-22	8.372e-21
NDUFA4	2991.56	0.889812	0.105492	8.43488	3.31554e-17	3.44665e-16
MAVS	13910.8	0.889658	0.101968	8.72491	2.66387e-18	3.06426e-17
LOC101927151	551.115	0.889584	0.125415	7.09313	1.31109e-12	9.44137e-12
ABHD4	1000.95	0.888839	0.116413	7.63523	2.25412e-14	1.89494e-13
ZSWIM8	4881.61	0.887974	0.0804538	11.0371	2.53193e-28	5.4207e-27
TMEM134	119.231	0.887507	0.200428	4.42806	9.50825e-06	3.23105e-05
PRAF2	940.409	0.886525	0.112879	7.85375	4.03774e-15	3.59426e-14
UQCRFS1	2397.52	0.886467	0.0862136	10.2822	8.47587e-25	1.49316e-23
ETNK2	140.007	0.885571	0.190253	4.6547	3.24459e-06	1.17663e-05
CPED1	575.528	0.885048	0.148632	5.95462	2.60681e-09	1.37337e-08
ANKFY1	3325.11	0.884708	0.0892194	9.91609	3.54355e-23	5.61433e-22
SERPINF1	4591.99	0.883907	0.112337	7.86836	3.5933e-15	3.21187e-14
SHTN1	9915.23	0.883814	0.070865	12.4718	1.06391e-35	3.28184e-34
PAFAH2	879.102	0.883421	0.103603	8.52698	1.50223e-17	1.6138e-16
DPP3	915.325	0.883316	0.0953523	9.2637	1.97462e-20	2.66486e-19
CARD14	170.28	0.883231	0.187156	4.71923	2.3674e-06	8.72762e-06
ACOT8	490.823	0.883071	0.127145	6.94538	3.77443e-12	2.58381e-11
SNN	1649.38	0.882991	0.124427	7.09643	1.28019e-12	9.24516e-12
YTHDF3	7386.65	0.882771	0.10116	8.72646	2.62761e-18	3.02485e-17
ALAS1	3319.31	0.882645	0.0792771	11.1337	8.60182e-29	1.90083e-27
KDELR3	149.532	0.882314	0.17952	4.91486	8.88449e-07	3.47719e-06
ARNTL	1102.8	0.882242	0.111094	7.94142	1.9988e-15	1.82329e-14
ATP6V0D1	2703.55	0.882087	0.0834025	10.5763	3.83941e-26	7.31811e-25
AIFM1	6041.11	0.881604	0.0946695	9.31244	1.24932e-20	1.71046e-19
MAP3K3	914.969	0.881031	0.124821	7.05836	1.6848e-12	1.20009e-11
NFS1	3871.5	0.880908	0.0883673	9.96871	2.08921e-23	3.36657e-22
WNK2	162.586	0.88057	0.18294	4.81343	1.48358e-06	5.6145e-06
SYTL2	5265.34	0.880337	0.10775	8.17018	3.07924e-16	2.9931e-15
ACTR8	1413.14	0.878825	0.101928	8.62205	6.57674e-18	7.29328e-17
MDGA2	1250.48	0.878781	0.107558	8.17033	3.0756e-16	2.99148e-15
ZFP28	33.8583	0.87745	0.3199	2.74289	0.00609015	0.0130448
UNC13B	1633.93	0.877029	0.10651	8.23423	1.8071e-16	1.7806e-15
ATP5H	2378.43	0.876739	0.0903432	9.70455	2.88357e-22	4.38042e-21
INPP1	733.831	0.875988	0.103902	8.43089	3.4306e-17	3.56382e-16
MYO18A	3561.36	0.875649	0.0870206	10.0626	8.08753e-24	1.34038e-22
SPG11	3017.55	0.87308	0.0964936	9.04806	1.4553e-19	1.84847e-18
SMARCD3	217.984	0.872962	0.16339	5.34281	9.1519e-08	4.04358e-07
PRKACA	2552.48	0.872701	0.0799817	10.9113	1.01842e-27	2.11738e-26
DENND5B	1646.12	0.871954	0.0855005	10.1982	2.01914e-24	3.46416e-23
RBMS3	193.224	0.871758	0.163338	5.33715	9.44163e-08	4.16323e-07
ZNF611	454.879	0.871032	0.121306	7.18043	6.94949e-13	5.14657e-12
ANXA2P2	235.221	0.870977	0.148145	5.87922	4.12206e-09	2.12718e-08
FAM228B	73.3465	0.870631	0.253889	3.42918	0.000605414	0.00155891
ACTR3	14362.8	0.870143	0.079929	10.8864	1.33757e-27	2.75441e-26
NDUFV1	5729.2	0.869031	0.100709	8.62911	6.18309e-18	6.87187e-17
JOSD2	143.658	0.868928	0.201562	4.31098	1.62532e-05	5.34058e-05
KCTD21	426.63	0.868756	0.134049	6.48091	9.11726e-11	5.4991e-10
VPS39	2522.25	0.868293	0.109231	7.94916	1.87781e-15	1.71707e-14
PDPK1	1151.91	0.868278	0.102749	8.45045	2.9017e-17	3.03314e-16
TMLHE	317.586	0.867961	0.142136	6.10657	1.01795e-09	5.58894e-09
TMEM120A	467.326	0.867958	0.131794	6.58574	4.52634e-11	2.80852e-10
TMEM182	150.774	0.867765	0.197577	4.39204	1.12294e-05	3.77182e-05
HEBP1	718.447	0.867277	0.134103	6.46726	9.97971e-11	6.0073e-10
PPARA	2961.8	0.867195	0.150276	5.77069	7.89486e-09	3.96712e-08
TMUB2	1067.78	0.866462	0.114071	7.59584	3.05805e-14	2.54389e-13
ANXA2	24678.5	0.86606	0.093559	9.25684	2.1057e-20	2.82411e-19
MCCC1	1955.94	0.86522	0.0979001	8.83779	9.76337e-19	1.15835e-17
UST	1019.71	0.865014	0.0999105	8.65789	4.80596e-18	5.41701e-17
ANKRD42	764.097	0.863009	0.0998336	8.64447	5.40541e-18	6.0431e-17
PAEP	98.6576	0.86125	0.240608	3.57947	0.000344291	0.000925375
ZNF28	595.21	0.861021	0.123583	6.96715	3.23432e-12	2.23329e-11
CXXC5	298.273	0.86092	0.136524	6.30599	2.86353e-10	1.65959e-09
MCC	3639.2	0.859293	0.0842045	10.2048	1.88642e-24	3.24383e-23
ITGBL1	81.7404	0.859219	0.264143	3.25286	0.00114252	0.00279798
EHD4	1492.31	0.858641	0.101346	8.47234	2.40517e-17	2.53339e-16
RAB40B	50.1545	0.858146	0.287113	2.98888	0.00280005	0.00640672
PDE6D	1221.19	0.857285	0.0916203	9.35693	8.20834e-21	1.15092e-19
MRPS36	379.81	0.856581	0.147846	5.79373	6.88402e-09	3.48349e-08
LOC101929295	47.4562	0.855398	0.282929	3.02337	0.00249975	0.00577645
CDC42EP4	600.313	0.855186	0.133481	6.4068	1.48609e-10	8.82254e-10
MAP3K2	1656.58	0.855026	0.109322	7.82121	5.23195e-15	4.62732e-14
ACTR10	1910.27	0.854384	0.0984267	8.68041	3.94349e-18	4.47828e-17
PDK3	2201.31	0.854009	0.115175	7.41491	1.21705e-13	9.56614e-13
TACC1	11469.5	0.85393	0.0801258	10.6574	1.61093e-26	3.12971e-25
FECH	906.188	0.853796	0.113686	7.51012	5.90719e-14	4.80555e-13
SUCLG1	4810.35	0.853437	0.0811346	10.5188	7.07787e-26	1.32403e-24
ZHX3	1233.88	0.852998	0.118229	7.21478	5.40214e-13	4.03226e-12
HMGCL	626.84	0.852863	0.16852	5.06089	4.17306e-07	1.6997e-06
RGP1	707.43	0.852548	0.124687	6.83752	8.05783e-12	5.36538e-11
PAPD4	1863.95	0.852113	0.0914464	9.31816	1.18375e-20	1.62954e-19
C4orf3	964.332	0.850906	0.107096	7.94524	1.93819e-15	1.77013e-14
ZNF470	258.486	0.850025	0.140889	6.03328	1.60667e-09	8.67315e-09
TRAF6	1057.65	0.849698	0.095953	8.85535	8.34227e-19	9.96786e-18
CXorf40A	180.432	0.848635	0.175644	4.83155	1.35474e-06	5.15661e-06
COX5A	2573.92	0.848504	0.129538	6.55021	5.74562e-11	3.52027e-10
TMEM184C	1602.15	0.848376	0.0981191	8.64639	5.3155e-18	5.96023e-17
APPBP2	2189.4	0.848321	0.0798816	10.6197	2.41251e-26	4.65116e-25
TRADD	82.267	0.848262	0.243534	3.48314	0.000495578	0.00129395
ZDHHC7	2259.02	0.847444	0.07989	10.6076	2.74609e-26	5.28081e-25
CYP2U1	751.359	0.847149	0.107025	7.91544	2.46382e-15	2.22865e-14
FAM174B	1588.85	0.847029	0.0933284	9.0758	1.1285e-19	1.44798e-18
UAP1L1	5005.95	0.846032	0.0816999	10.3554	3.95716e-25	7.14605e-24
PLEKHJ1	963.254	0.845908	0.114107	7.41327	1.23222e-13	9.6753e-13
CARD8	623.392	0.845864	0.103865	8.14388	3.82821e-16	3.68556e-15
TIMP2	7765.74	0.844639	0.096427	8.75936	1.96365e-18	2.27611e-17
PNPLA7	125.503	0.844625	0.202247	4.17621	2.96402e-05	9.34916e-05
CCNDBP1	1107.51	0.844586	0.105075	8.0379	9.13896e-16	8.57451e-15
DHFRL1	941.384	0.843348	0.105297	8.0092	1.1546e-15	1.07594e-14
GOLGA7	2002.85	0.842893	0.0890914	9.46098	3.05057e-21	4.36229e-20
RBM7	1804.5	0.842627	0.111522	7.55573	4.16512e-14	3.42337e-13
PTTG1IP	29914.8	0.841253	0.0809624	10.3907	2.73426e-25	4.97332e-24
ZNF846	72.1974	0.841104	0.243038	3.46079	0.000538595	0.00139757
LOC339803	493.219	0.839351	0.13039	6.43723	1.21675e-10	7.2894e-10
COQ10B	808.697	0.838948	0.103298	8.12167	4.59808e-16	4.39873e-15
MAP2K5	1868.52	0.838677	0.110426	7.59489	3.08044e-14	2.5611e-13
MRPL44	3001.64	0.837811	0.0794063	10.5509	5.02896e-26	9.47789e-25
DNAJB5	146.94	0.83747	0.178932	4.68039	2.86324e-06	1.04688e-05
MYL6	4988.83	0.836487	0.115177	7.26262	3.79657e-13	2.86926e-12
ACAA2	2051.24	0.834884	0.0817521	10.2124	1.7452e-24	3.01127e-23
ESRRG	88.8874	0.834761	0.235249	3.54841	0.00038756	0.00103224
SULT1C2	216.282	0.834578	0.196572	4.24566	2.17948e-05	7.02256e-05
LINC01560	54.0997	0.834557	0.275098	3.03367	0.00241597	0.00560169
TMBIM4	384.819	0.834003	0.122724	6.79578	1.07728e-11	7.07959e-11
RNF24	933.452	0.83373	0.120963	6.89245	5.48409e-12	3.70054e-11
ENDOV	176.134	0.833613	0.193398	4.31035	1.63e-05	5.35364e-05
KIF21B	80.6387	0.833594	0.247819	3.36372	0.00076899	0.00194565
RNF139-AS1	42.4726	0.833517	0.328426	2.53791	0.0111515	0.0225976
SLC22A15	86.6471	0.83324	0.236066	3.52969	0.000416043	0.00110073
IMMT	8870.75	0.83313	0.0794713	10.4834	1.0297e-25	1.90734e-24
C21orf33	73.1243	0.833126	0.236008	3.53008	0.000415439	0.00109955
COX4I1	7642.13	0.833027	0.0814526	10.2271	1.49875e-24	2.59789e-23
MAGED1	5199.08	0.832603	0.0734111	11.3417	8.15882e-30	1.89724e-28
MARS2	1143.88	0.832018	0.0917457	9.06874	1.20403e-19	1.53707e-18
NUDT16L1	255.293	0.83104	0.157323	5.28238	1.27518e-07	5.52433e-07
SLC6A15	15105.5	0.831029	0.0835044	9.95193	2.4735e-23	3.96468e-22
NCDN	2268.7	0.830934	0.082579	10.0623	8.10826e-24	1.34235e-22
SDHA	7420.32	0.830489	0.0792262	10.4825	1.0395e-25	1.92313e-24
OTUD1	116.729	0.830398	0.209143	3.97048	7.17285e-05	0.000214434
MTCH2	4356.31	0.830341	0.0839149	9.89504	4.37435e-23	6.9017e-22
LOC101929450	1568.25	0.830198	0.15745	5.27277	1.34382e-07	5.80835e-07
SLC25A44	2852.19	0.830112	0.0971744	8.54251	1.31343e-17	1.42006e-16
ISOC2	914.559	0.830021	0.151822	5.46706	4.5755e-08	2.10107e-07
ATG4B	2950.46	0.829736	0.0897595	9.24399	2.37464e-20	3.17073e-19
PFKFB2	1527.7	0.828261	0.155481	5.32709	9.97993e-08	4.38508e-07
SNPH	754.914	0.828238	0.138541	5.97827	2.25519e-09	1.19688e-08
DNAJB4	1387.49	0.828128	0.141951	5.83391	5.41418e-09	2.76005e-08
ALKBH7	160.939	0.827809	0.214232	3.86408	0.000111507	0.000323562
PPP1R12B	998.179	0.827563	0.122044	6.78084	1.19477e-11	7.8042e-11
CNP	11739	0.827322	0.0823321	10.0486	9.31872e-24	1.53267e-22
C9orf89	102.438	0.827106	0.213888	3.86701	0.000110176	0.000320191
ZHX2	804.491	0.827097	0.101367	8.15946	3.36539e-16	3.25868e-15
GRN	8882.32	0.826307	0.094186	8.77314	1.73755e-18	2.02123e-17
TMEM150A	211.93	0.826033	0.157832	5.23362	1.6622e-07	7.09721e-07
PCDHGB2	45.2825	0.824832	0.286846	2.87552	0.00403359	0.00893823
ARMC7	225.504	0.824099	0.167974	4.90612	9.2895e-07	3.62257e-06
FBXO18	3328.1	0.823463	0.0796955	10.3326	5.01755e-25	8.94343e-24
ACAT1	8078.6	0.823244	0.0952656	8.64157	5.54443e-18	6.19394e-17
SERAC1	344.817	0.822856	0.140414	5.86021	4.62269e-09	2.37417e-08
NDST1	4251.52	0.82277	0.0981838	8.3799	5.29748e-17	5.43225e-16
GPR137	1066.88	0.822497	0.0979877	8.39388	4.70337e-17	4.83945e-16
ACO1	1560.18	0.822495	0.0932793	8.81756	1.16983e-18	1.37817e-17
KIAA1033	6353.27	0.821307	0.0921846	8.90938	5.1318e-19	6.24534e-18
OBFC1	334.986	0.821098	0.138811	5.91524	3.31399e-09	1.72907e-08
MIEF2	111.167	0.820926	0.248918	3.29799	0.000973813	0.00241377
C11orf68	428.995	0.820676	0.147803	5.55251	2.81592e-08	1.32925e-07
CHRNA7	126.692	0.820653	0.202714	4.04832	5.15865e-05	0.000157267
FLJ27354	93.9865	0.820053	0.228181	3.59387	0.000325808	0.000878799
SAT2	725.871	0.81914	0.125521	6.52591	6.75895e-11	4.12441e-10
ITGA9	1965.42	0.818999	0.144044	5.68576	1.30229e-08	6.39925e-08
ADAM12	151.075	0.818513	0.224488	3.64613	0.000266218	0.000729253
BCKDHA	528.123	0.818416	0.130995	6.24771	4.16521e-10	2.37933e-09
PQLC1	1557.03	0.818414	0.100217	8.16644	3.17616e-16	3.08137e-15
SCYL2	3720.35	0.817959	0.106322	7.69322	1.4348e-14	1.22387e-13
ILVBL	1816.22	0.817412	0.0918807	8.89645	5.76591e-19	6.98332e-18
LOC101927204	75.437	0.817174	0.270054	3.02596	0.00247846	0.00573075
SYNJ2BP	6842.88	0.817093	0.0803327	10.1714	2.66138e-24	4.53515e-23
RGS7	417.433	0.817054	0.136121	6.00242	1.94403e-09	1.03757e-08
ARHGEF7	4801.96	0.817037	0.0860631	9.49346	2.23488e-21	3.22023e-20
DLAT	7040.68	0.816844	0.0977038	8.36042	6.24972e-17	6.36554e-16
ATP6V0A1	4287	0.816723	0.0824044	9.91115	3.72318e-23	5.88659e-22
MYO6	1089.99	0.815645	0.112013	7.2817	3.2964e-13	2.50126e-12
LOC102724814	137.177	0.815346	0.220262	3.70171	0.000214153	0.000596667
ACTR1A	3119.14	0.814293	0.0769732	10.5789	3.73236e-26	7.13207e-25
SLC25A51	301.613	0.814286	0.138327	5.88666	3.94069e-09	2.03775e-08
ZSCAN12P1	77.623	0.813609	0.241237	3.37265	0.000744493	0.00188777
AES	4218.65	0.813168	0.0955249	8.51263	1.70033e-17	1.81244e-16
AP2B1	9465.48	0.813029	0.0916239	8.87355	7.08496e-19	8.51266e-18
BICD2	5636.34	0.812146	0.0730957	11.1107	1.11252e-28	2.41954e-27
ELF1	3580.65	0.811905	0.105992	7.66004	1.85876e-14	1.57484e-13
GSTP1	23138.4	0.811163	0.0899928	9.01365	1.99317e-19	2.49394e-18
GABPB2	213.077	0.810997	0.161489	5.022	5.11349e-07	2.05888e-06
NDUFS2	6157.25	0.810856	0.080703	10.0474	9.43172e-24	1.54957e-22
C16orf86	36.7985	0.810773	0.319948	2.53408	0.0112744	0.0228251
JHDM1D-AS1	121.449	0.809732	0.241298	3.35573	0.000791546	0.00199937
HELZ	6113.38	0.808805	0.0819768	9.86627	5.8292e-23	9.09271e-22
MYADM	49.7589	0.808304	0.274959	2.93972	0.00328506	0.00741703
DNAJB2	957.896	0.807858	0.114632	7.04742	1.82259e-12	1.29154e-11
COQ6	340.695	0.807653	0.130308	6.19804	5.71722e-10	3.22327e-09
CAMTA2	821.368	0.807384	0.11297	7.14686	8.87841e-13	6.51759e-12
LINC00681	61.8327	0.807217	0.320654	2.51741	0.0118222	0.0237907
ABCD1	3891.93	0.807078	0.087705	9.20219	3.50727e-20	4.6178e-19
LOC100129518	34.9106	0.806758	0.309146	2.60963	0.0090639	0.018739
DPM3	188.545	0.806737	0.177098	4.55531	5.23085e-06	1.83785e-05
GABARAPL1	1188.56	0.806006	0.12984	6.20768	5.37735e-10	3.04073e-09
MDH2	13294	0.805976	0.0886352	9.09318	9.61834e-20	1.23834e-18
USP9Y	952.797	0.805627	0.116206	6.93277	4.12676e-12	2.8148e-11
ATP6V1A	4773.57	0.805336	0.0815054	9.88077	5.04423e-23	7.9173e-22
CACNA1D	37.9517	0.805116	0.30646	2.62715	0.00861025	0.0178794
CPEB3	209.976	0.804963	0.156613	5.13982	2.75009e-07	1.14259e-06
RIT1	1318.73	0.804688	0.0968093	8.3121	9.40255e-17	9.47463e-16
KDM4A	3082.23	0.803519	0.104422	7.69495	1.41551e-14	1.20878e-13
SLC25A35	71.6423	0.8035	0.264541	3.03734	0.00238678	0.00553995
PRKCE	1312.37	0.803304	0.0925681	8.67798	4.02861e-18	4.56465e-17
B3GNT9	38.0734	0.803156	0.337132	2.38232	0.017204	0.0333511
UQCR10	3250.76	0.802303	0.115165	6.96656	3.24788e-12	2.24163e-11
THAP8	46.7516	0.802261	0.294119	2.72767	0.0063783	0.0135939
THBS3	331.468	0.802084	0.187234	4.28386	1.83682e-05	5.97966e-05
SLC35E4	208.526	0.801854	0.16915	4.74049	2.13198e-06	7.90211e-06
C10orf32	246.778	0.801355	0.145181	5.5197	3.3957e-08	1.58708e-07
SDHB	6432.25	0.801315	0.0730073	10.9758	4.9954e-28	1.05898e-26
ATF7	1595.02	0.800363	0.0981103	8.15779	3.4121e-16	3.29968e-15
FBXO6	36.9982	0.800297	0.302226	2.64801	0.00809682	0.0168898
GDI1	4306.33	0.799996	0.093083	8.59443	8.36771e-18	9.20958e-17
ACBD5	1445.32	0.799211	0.098866	8.08378	6.27887e-16	5.97263e-15
AFG3L2	7623.28	0.798121	0.0917506	8.69881	3.35393e-18	3.83759e-17
LARS2	3124.58	0.797615	0.0778308	10.2481	1.20734e-24	2.1e-23
SCAMP5	294.644	0.79708	0.15907	5.01088	5.41826e-07	2.17406e-06
PDZD11	1231.44	0.796994	0.09886	8.06185	7.51504e-16	7.1127e-15
FAM131A	862.675	0.796817	0.133199	5.98216	2.20198e-09	1.17029e-08
ACRC	36.7608	0.796438	0.349826	2.27667	0.022806	0.0428427
TPT1-AS1	135.988	0.795855	0.180107	4.41878	9.9259e-06	3.36315e-05
C15orf52	1738.25	0.795567	0.155867	5.10415	3.3228e-07	1.36701e-06
WDR37	535.474	0.795216	0.120334	6.60842	3.8845e-11	2.42922e-10
AP5M1	2051.97	0.79485	0.0893446	8.89646	5.76585e-19	6.98332e-18
SLC25A3	11218.9	0.794785	0.0774914	10.2564	1.10719e-24	1.93919e-23
NDN	892.9	0.794697	0.105963	7.49973	6.39493e-14	5.18559e-13
LPIN3	933.206	0.794122	0.158477	5.01095	5.41624e-07	2.17383e-06
ETFA	5649.37	0.793645	0.0765888	10.3624	3.67535e-25	6.64509e-24
NEU3	1026.63	0.793283	0.102184	7.76326	8.27721e-15	7.21511e-14
ST20	353.348	0.792903	0.159975	4.95643	7.18002e-07	2.84174e-06
URGCP	1408.02	0.792815	0.0974128	8.13871	3.99505e-16	3.83398e-15
PHF20L1	4134.44	0.792507	0.113281	6.99594	2.63489e-12	1.83786e-11
ABHD5	606.84	0.792455	0.126171	6.28079	3.36864e-10	1.93822e-09
ARMC5	482.026	0.79168	0.152851	5.17944	2.22556e-07	9.35465e-07
HDAC6	766.84	0.791677	0.138849	5.7017	1.18616e-08	5.84953e-08
DDT	1329.27	0.791352	0.155395	5.09252	3.53342e-07	1.4509e-06
ATP5D	973.386	0.790976	0.166886	4.73962	2.14119e-06	7.93236e-06
ZEB2	23402.4	0.790445	0.120089	6.58216	4.63673e-11	2.87348e-10
WARS	5782.95	0.790312	0.0981556	8.05162	8.17037e-16	7.6944e-15
NHEJ1	526.15	0.789837	0.130335	6.06006	1.36072e-09	7.393e-09
MGC72080	186.828	0.789711	0.181272	4.3565	1.3216e-05	4.39322e-05
ZNF772	606.279	0.788466	0.113542	6.94427	3.80416e-12	2.60181e-11
PPIF	6086.76	0.785564	0.0950934	8.26098	1.44486e-16	1.43489e-15
C20orf196	96.5155	0.785493	0.212329	3.69941	0.000216098	0.000601421
DIP2C	2682.86	0.785275	0.0994664	7.89488	2.90591e-15	2.61897e-14
STK32C	83.8504	0.784819	0.221271	3.54686	0.000389847	0.0010376
MAN2B1	2579.91	0.784627	0.0967725	8.10796	5.14782e-16	4.90601e-15
ARSB	690.408	0.784162	0.104533	7.50156	6.3061e-14	5.11905e-13
MAGI3	1327.99	0.783586	0.103669	7.55853	4.0764e-14	3.35593e-13
RHBDD2	858.96	0.782044	0.101264	7.72281	1.13791e-14	9.80029e-14
SOX12	2524.71	0.780935	0.110909	7.0412	1.90594e-12	1.34493e-11
PTPN21	497.252	0.780907	0.11551	6.76054	1.37478e-11	8.91452e-11
TXN2	4353.38	0.780531	0.0919334	8.49019	2.06306e-17	2.18369e-16
FBXW4	319.918	0.780418	0.149606	5.21648	1.82356e-07	7.74897e-07
ZNF337-AS1	85.0501	0.780381	0.213715	3.6515	0.000260712	0.000715704
CPT2	1592.41	0.780375	0.0848864	9.19317	3.81433e-20	5.00901e-19
STX18-AS1	62.2209	0.780279	0.264867	2.94592	0.00321992	0.00728471
CAPNS1	5771.45	0.780149	0.0728637	10.707	9.43955e-27	1.85538e-25
FBXO10	642.204	0.78008	0.117503	6.63882	3.16199e-11	1.99057e-10
SECISBP2L	3984.71	0.779846	0.0846323	9.21453	3.12653e-20	4.1273e-19
PLOD2	2095.4	0.779336	0.119748	6.50813	7.6093e-11	4.62092e-10
GNS	6267.39	0.778873	0.0828186	9.40456	5.22463e-21	7.40115e-20
NAPA	3439.34	0.778852	0.0779789	9.98798	1.72044e-23	2.79318e-22
IQSEC1	1323.02	0.77856	0.106689	7.29744	2.93292e-13	2.23781e-12
SNX19	3714.55	0.778513	0.0789937	9.85538	6.49707e-23	1.01136e-21
HEATR5A	2776.4	0.778316	0.0861208	9.03749	1.60308e-19	2.03107e-18
CLPTM1	6368.46	0.777861	0.0861951	9.02442	1.80657e-19	2.26985e-18
MAPK8IP1	387.924	0.777457	0.1328	5.85435	4.7887e-09	2.4561e-08
LMX1B	559.139	0.777209	0.121028	6.42174	1.34725e-10	8.0362e-10
FNBP1	1909.87	0.776492	0.087978	8.82597	1.08513e-18	1.27939e-17
EP300-AS1	68.0741	0.776458	0.248729	3.1217	0.00179808	0.00426925
PDPR	1746.1	0.776141	0.109283	7.10214	1.22837e-12	8.89642e-12
MAP3K12	295.774	0.776102	0.136611	5.68111	1.33821e-08	6.56936e-08
BLVRB	662.899	0.775378	0.109208	7.10003	1.24727e-12	9.01601e-12
UQCRQ	1342.57	0.775038	0.0981014	7.90037	2.78069e-15	2.50777e-14
SLC9A1	1930.78	0.774753	0.0839921	9.22412	2.85893e-20	3.79059e-19
DYNLL2	1379.2	0.77472	0.0925582	8.37008	5.75778e-17	5.87635e-16
CA14	1469.6	0.77449	0.104127	7.43796	1.02254e-13	8.092e-13
RRAGB	490.753	0.773684	0.12692	6.09585	1.08857e-09	5.95071e-09
ZNF749	1058.49	0.773525	0.106096	7.29082	3.08073e-13	2.34704e-12
TEX264	1471.8	0.773371	0.087406	8.84803	8.90765e-19	1.06266e-17
TEP1	1191.92	0.771631	0.103375	7.4644	8.36821e-14	6.6959e-13
KCTD18	828.17	0.77133	0.103552	7.44869	9.42712e-14	7.49952e-13
SRPX	706.117	0.771131	0.10243	7.52835	5.13845e-14	4.20052e-13
NDUFA5	3825.19	0.770909	0.100703	7.65531	1.92851e-14	1.6312e-13
SUSD6	660.228	0.770909	0.111918	6.88816	5.65171e-12	3.81024e-11
LOC728323	307.525	0.770761	0.148755	5.1814	2.20226e-07	9.26035e-07
GSTA4	784.836	0.770722	0.101262	7.61119	2.7159e-14	2.26926e-13
NANS	9470.1	0.770301	0.0779505	9.88193	4.98652e-23	7.83485e-22
EHD2	756.86	0.77023	0.131992	5.83544	5.3648e-09	2.74042e-08
ERMP1	3632.81	0.770219	0.115324	6.67872	2.41037e-11	1.53466e-10
RBPMS-AS1	32.5693	0.769409	0.343142	2.24224	0.0249456	0.0464407
DPYSL4	531.707	0.769185	0.121592	6.32597	2.51653e-10	1.46749e-09
SH3GLB1	6969.49	0.768797	0.0900981	8.53288	1.42748e-17	1.53787e-16
COX6B1	2278.54	0.768283	0.105186	7.30407	2.79196e-13	2.13349e-12
C6orf1	559.144	0.768246	0.137735	5.5777	2.43724e-08	1.15809e-07
ZNF468	274.337	0.767634	0.144624	5.30778	1.10969e-07	4.85188e-07
DUSP16	3034.96	0.767121	0.0915717	8.37727	5.41674e-17	5.54326e-16
MARVELD1	1019.27	0.766647	0.0992323	7.72578	1.11168e-14	9.57987e-14
GPNMB	45378.5	0.766084	0.0880858	8.69702	3.40719e-18	3.89559e-17
DYNC1I1	366.983	0.765863	0.136387	5.61538	1.96131e-08	9.41416e-08
ACOX3	222.594	0.765238	0.169113	4.52502	6.03904e-06	2.10663e-05
FAT4	298.996	0.765168	0.165879	4.61281	3.97255e-06	1.42321e-05
STAT2	3028.25	0.764647	0.0904238	8.45626	2.76097e-17	2.89004e-16
UBR2	3344.1	0.763534	0.0773746	9.86801	5.72872e-23	8.9452e-22
ZNF816	77.4917	0.763359	0.242376	3.14948	0.00163559	0.00391108
STK38L	1441.41	0.762421	0.0933424	8.16801	3.1353e-16	3.04564e-15
KIAA1109	2930.55	0.762317	0.124952	6.10089	1.05478e-09	5.78274e-09
TJP2	1257.52	0.761195	0.106895	7.12097	1.07166e-12	7.79884e-12
C6orf62	4209.91	0.760947	0.0845575	8.99916	2.27445e-19	2.82716e-18
S100A10	1397.29	0.760769	0.12099	6.28787	3.21853e-10	1.85468e-09
DCLK2	344.069	0.760123	0.142426	5.33696	9.4516e-08	4.16626e-07
VWA8	3506.68	0.760094	0.0890218	8.53829	1.36222e-17	1.46967e-16
CBFA2T2	1834.58	0.759299	0.101309	7.4949	6.6348e-14	5.36284e-13
CELF6	709.217	0.759084	0.112689	6.73612	1.62677e-11	1.05169e-10
NLGN1	709.482	0.759051	0.11722	6.47545	9.45287e-11	5.69471e-10
ADAL	1734.88	0.758994	0.0873078	8.69331	3.52034e-18	4.02191e-17
VPS13B	1584.65	0.758878	0.105649	7.18302	6.81867e-13	5.05465e-12
SUCLA2	3079.82	0.758702	0.10194	7.44261	9.87119e-14	7.82396e-13
SH3BP5L	1389.81	0.758438	0.128667	5.89459	3.75616e-09	1.94633e-08
DPH3	2475.34	0.758315	0.111801	6.78273	1.17925e-11	7.71283e-11
GCC1	1094.46	0.758278	0.110814	6.84283	7.76464e-12	5.18386e-11
ZNF75D	183.686	0.75791	0.159792	4.7431	2.10471e-06	7.80871e-06
MFN2	8372.57	0.75773	0.0859613	8.81478	1.19917e-18	1.41164e-17
ZNF880	287.546	0.757708	0.173134	4.37643	1.20638e-05	4.03254e-05
METTL25	61.3873	0.757691	0.276096	2.74431	0.0060639	0.0129953
CARD6	412.002	0.757424	0.144095	5.25642	1.46888e-07	6.3182e-07
TECPR1	901.548	0.757014	0.132172	5.72751	1.01916e-08	5.05898e-08
TMEM59	4039.14	0.755498	0.0872913	8.65491	4.93296e-18	5.55602e-17
KCTD1	761.744	0.754182	0.103227	7.30607	2.75067e-13	2.103e-12
CDH1	51.3985	0.754085	0.292318	2.57967	0.00988942	0.0202848
GSTZ1	310.479	0.75402	0.138258	5.4537	4.93324e-08	2.25207e-07
CDH3	4438.25	0.753682	0.0744835	10.1188	4.56075e-24	7.64255e-23
FAM180B	75.1036	0.753323	0.255539	2.94797	0.00319864	0.00724199
NDRG3	3508.79	0.753295	0.090318	8.34047	7.39933e-17	7.50107e-16
PANK1	683.617	0.752699	0.110307	6.8237	8.87281e-12	5.89247e-11
CNPY4	634.712	0.752382	0.110676	6.79808	1.06025e-11	6.9744e-11
CLIC4	11277.7	0.752134	0.0971994	7.73806	1.00946e-14	8.73027e-14
STUB1	2420.86	0.751626	0.0995623	7.5493	4.37615e-14	3.58902e-13
MMAA	149.1	0.751343	0.19699	3.81412	0.000136669	0.00039124
ARL8A	666.935	0.751267	0.108094	6.95014	3.64915e-12	2.50145e-11
RALGAPA2	2489.07	0.75114	0.0985722	7.6202	2.53279e-14	2.12094e-13
SPATA7	202.389	0.751121	0.184013	4.0819	4.4669e-05	0.000137734
VIM	76850	0.751111	0.105082	7.14783	8.81594e-13	6.47802e-12
WSB2	3659.06	0.750943	0.0782345	9.59862	8.10232e-22	1.19015e-20
LRRK2	971.301	0.75086	0.128936	5.82349	5.76297e-09	2.93093e-08
NREP	103.755	0.75039	0.206148	3.64006	0.000272576	0.000745429
CCDC154	158.246	0.749849	0.19422	3.86081	0.000113011	0.000327484
GSK3B	5535.89	0.749517	0.0890899	8.41304	3.99517e-17	4.1361e-16
APC	5367.28	0.749432	0.0920673	8.14005	3.95128e-16	3.79439e-15
PRKAB1	748.093	0.74922	0.106996	7.00233	2.51734e-12	1.7583e-11
CREB3	697.835	0.749044	0.105581	7.09449	1.29828e-12	9.3579e-12
FSTL1	3403.34	0.747795	0.113996	6.55984	5.38654e-11	3.311e-10
POR	4488.95	0.747212	0.0888429	8.41049	4.08298e-17	4.22122e-16
SLC25A25-AS1	153.77	0.746508	0.178486	4.18244	2.88396e-05	9.11946e-05
PDZD7	54.6753	0.746117	0.278932	2.67491	0.00747489	0.0157074
ANXA4	651.385	0.745273	0.112418	6.6295	3.36819e-11	2.11603e-10
MON1B	884.992	0.745233	0.0998067	7.46677	8.21899e-14	6.58696e-13
FOXN3	2235.34	0.744595	0.13244	5.62215	1.88598e-08	9.07107e-08
ABCF3	2339.83	0.744382	0.0823184	9.04271	1.52833e-19	1.93798e-18
NEK1	1045.21	0.743853	0.0968327	7.68183	1.56826e-14	1.3347e-13
ZNF606	87.2541	0.743287	0.257815	2.88303	0.00393872	0.00874725
PTEN	1905.24	0.743055	0.100169	7.41799	1.18911e-13	9.35623e-13
MED25	2056.48	0.742522	0.0956451	7.7633	8.27495e-15	7.21511e-14
CCM2	321.163	0.742153	0.13799	5.37832	7.51851e-08	3.35426e-07
HYAL3	131.159	0.741981	0.192778	3.84888	0.000118658	0.000342733
SEMA6D	6771.41	0.741903	0.0905062	8.19727	2.45917e-16	2.41052e-15
MTM1	642.203	0.741753	0.106542	6.96205	3.35364e-12	2.31146e-11
PLEKHG4	126.14	0.741619	0.18299	4.05278	5.0613e-05	0.000154518
AGPAT2	1662.7	0.740744	0.117513	6.3035	2.90996e-10	1.68392e-09
PITRM1	3213.87	0.740677	0.0769153	9.62978	5.98598e-22	8.86171e-21
CTIF	738.323	0.740522	0.113684	6.51388	7.32333e-11	4.45979e-10
UGDH	1919.86	0.73948	0.0937193	7.89037	3.01285e-15	2.70956e-14
ATXN1	855.085	0.739111	0.127976	5.77538	7.67814e-09	3.86593e-08
KLF13	732.943	0.738545	0.123503	5.97996	2.23188e-09	1.18576e-08
ALMS1P	200.268	0.738075	0.174904	4.2199	2.44413e-05	7.81202e-05
GDE1	3555.15	0.737689	0.0745957	9.88916	4.63923e-23	7.29677e-22
DNM1	262.189	0.737672	0.20079	3.67385	0.000238928	0.000661306
STS	83.745	0.737315	0.226701	3.25237	0.00114445	0.00280136
NDUFB7	2407.01	0.736855	0.0943482	7.80995	5.72103e-15	5.03924e-14
MRPL34	2370.23	0.736726	0.112296	6.5606	5.3593e-11	3.29828e-10
TPP1	13161.1	0.736467	0.0776703	9.48197	2.49525e-21	3.59198e-20
SDHC	2459.32	0.73638	0.0794766	9.26537	1.94403e-20	2.62591e-19
NRAP	157.479	0.735637	0.180654	4.07208	4.65952e-05	0.000143206
TMEM102	140.338	0.734626	0.176631	4.1591	3.19506e-05	0.000100402
TCP11L2	82.8448	0.734048	0.27049	2.71377	0.00665225	0.0141101
FLYWCH2	371.624	0.733775	0.146154	5.02057	5.15191e-07	2.07325e-06
SCP2	3593.16	0.732797	0.0846916	8.65253	5.03688e-18	5.66883e-17
FBXL17	618.148	0.732746	0.127267	5.75756	8.53399e-09	4.27548e-08
IRX6	350.576	0.73244	0.141283	5.1842	2.16939e-07	9.13889e-07
ECHS1	1844.05	0.732185	0.0855154	8.56202	1.1091e-17	1.20865e-16
ADGRG1	5588.87	0.732174	0.103738	7.05788	1.6906e-12	1.20308e-11
TMEM185A	163.802	0.732084	0.174482	4.19575	2.71972e-05	8.64533e-05
PCDHGA6	32.827	0.731627	0.329673	2.21925	0.0264697	0.0488928
FAHD2A	813.811	0.729872	0.129759	5.62485	1.85668e-08	8.93747e-08
NDUFS3	1746.82	0.729499	0.0932895	7.81973	5.29367e-15	4.67643e-14
TGFBR2	1083.53	0.72943	0.0982591	7.42354	1.14027e-13	8.98135e-13
ATXN7L1	536.503	0.729218	0.1218	5.98703	2.13701e-09	1.13776e-08
NARS2	4506.51	0.72896	0.0786912	9.26355	1.97753e-20	2.6664e-19
TBC1D16	28780.6	0.728811	0.106828	6.82229	8.96029e-12	5.94534e-11
COG1	1332.59	0.728745	0.0882548	8.25728	1.4903e-16	1.4771e-15
HIGD2A	1118.36	0.727989	0.103297	7.04752	1.82132e-12	1.29124e-11
CYP20A1	647.723	0.727611	0.132827	5.47789	4.30422e-08	1.9859e-07
MFSD5	575.152	0.726479	0.114165	6.36339	1.97345e-10	1.1611e-09
SOCS2	381.883	0.726346	0.136303	5.3289	9.88118e-08	4.34548e-07
ANKRD52	7055.05	0.726133	0.113872	6.37674	1.80895e-10	1.06723e-09
TMEM106B	2403.37	0.725461	0.0848912	8.54578	1.27677e-17	1.38438e-16
PGM2L1	302.439	0.725397	0.164976	4.39699	1.09763e-05	3.6942e-05
HPDL	2451.52	0.725326	0.138087	5.25268	1.499e-07	6.43675e-07
COQ7	912.12	0.725087	0.0965914	7.50675	6.06152e-14	4.9258e-13
PPM1N	35.6228	0.724326	0.31795	2.27811	0.0227198	0.0427126
DNAJB9	554.472	0.724072	0.133721	5.4148	6.13564e-08	2.76836e-07
CUEDC2	769.03	0.724067	0.131037	5.52567	3.28228e-08	1.53597e-07
RIOK3	1887.37	0.72384	0.0893773	8.0987	5.55508e-16	5.2908e-15
CHP1	3260.9	0.723814	0.0759972	9.52421	1.663e-21	2.40309e-20
PLA2G16	993.318	0.723801	0.107788	6.71506	1.87983e-11	1.21115e-10
ARMCX6	215.448	0.723255	0.165145	4.37951	1.18946e-05	3.98198e-05
TMEM51	1817.69	0.722531	0.0827887	8.72741	2.60574e-18	3.00196e-17
GABRB3	2968.94	0.722439	0.0897269	8.05153	8.17636e-16	7.69524e-15
CROT	283.971	0.722304	0.148089	4.87749	1.07445e-06	4.15246e-06
WDFY1	12046.2	0.721908	0.0812449	8.88558	6.359e-19	7.6709e-18
SLC35A4	2012.66	0.721666	0.0870519	8.29006	1.13187e-16	1.133e-15
CRBN	1168.25	0.721408	0.106296	6.7868	1.14651e-11	7.51821e-11
ERICH2	48.2195	0.721348	0.280039	2.57588	0.00999851	0.0204835
SMDT1	245.774	0.721025	0.144053	5.00529	5.57789e-07	2.23337e-06
SLC25A45	105.013	0.72099	0.226236	3.1869	0.00143809	0.00347287
TXNRD3	350.837	0.720491	0.15136	4.76012	1.93476e-06	7.20116e-06
BECN1	4675.89	0.720414	0.0782771	9.20337	3.46891e-20	4.57128e-19
SLC2A10	125.495	0.719995	0.182143	3.95291	7.72071e-05	0.000229903
USP46-AS1	37.3451	0.719972	0.301377	2.38894	0.0168972	0.0328405
LINC00116	47.5556	0.719035	0.290203	2.4777	0.0132233	0.0263195
ASB8	545.536	0.718829	0.110852	6.4846	8.89693e-11	5.37049e-10
TST	150.716	0.718253	0.188496	3.81043	0.000138724	0.000396674
DCAKD	341.647	0.718025	0.13711	5.23686	1.63334e-07	6.98779e-07
PKD1L2	188.675	0.718014	0.234122	3.06684	0.00216336	0.00506179
USP19	4781.41	0.717942	0.0812109	8.84046	9.53269e-19	1.13365e-17
QARS	10656.5	0.717873	0.0797723	8.99902	2.27733e-19	2.82841e-18
FAM169A	806.938	0.717132	0.120443	5.95412	2.61476e-09	1.37707e-08
HIPK3	2700.55	0.716721	0.113861	6.29468	3.08044e-10	1.77849e-09
BLZF1	1562.59	0.716682	0.129092	5.5517	2.82906e-08	1.33393e-07
GAS1	465.449	0.716333	0.132206	5.41832	6.01603e-08	2.71764e-07
RNF11	3015.55	0.716037	0.0870532	8.22528	1.94742e-16	1.91761e-15
NBR2	56.8802	0.715702	0.26762	2.67432	0.00748807	0.0157329
CPT1A	509.081	0.715417	0.134987	5.29988	1.15878e-07	5.04898e-07
KLHL9	1795.1	0.714968	0.111514	6.41145	1.44144e-10	8.57097e-10
C9orf69	1193.22	0.714892	0.100522	7.11183	1.14518e-12	8.31785e-12
ITM2A	637.99	0.714344	0.142551	5.01115	5.41065e-07	2.17216e-06
MUT	3737.73	0.714193	0.0821559	8.69314	3.52556e-18	4.02484e-17
TUB	1516.98	0.713824	0.0897094	7.95707	1.76165e-15	1.61672e-14
CASP9	463.078	0.713823	0.130964	5.45055	5.02143e-08	2.28887e-07
DUSP22	1919.7	0.713736	0.0916442	7.78812	6.80124e-15	5.96638e-14
ARFGEF2	8334.2	0.713725	0.0953898	7.48219	7.30932e-14	5.87974e-13
C16orf58	3708.68	0.713721	0.0826862	8.63168	6.04548e-18	6.72388e-17
VPS13C	4354.82	0.713596	0.130859	5.45316	4.94834e-08	2.2576e-07
RNF141	1294.49	0.712997	0.101173	7.04727	1.82461e-12	1.29236e-11
CEMIP	487.984	0.712904	0.112134	6.35761	2.0492e-10	1.20333e-09
PREP	3710.83	0.712812	0.0782411	9.11045	8.20398e-20	1.06076e-18
LOC148709	135.836	0.712165	0.209156	3.40496	0.000661749	0.00169244
NDUFB9	5057.2	0.711549	0.0894316	7.95634	1.77201e-15	1.62524e-14
PAK1	1582.61	0.711472	0.0890173	7.99251	1.32223e-15	1.22761e-14
SCRN1	17832.7	0.711371	0.0903816	7.87074	3.52536e-15	3.15487e-14
MEGF10	580.369	0.71114	0.155996	4.55872	5.14662e-06	1.81078e-05
LYRM7	2201.51	0.7102	0.0794662	8.93713	3.99417e-19	4.88445e-18
PPP1R13B	739.45	0.709744	0.112167	6.32754	2.49095e-10	1.45314e-09
CLUH	7541.92	0.70944	0.0802591	8.83938	9.62505e-19	1.14373e-17
MED17	2714.19	0.709075	0.117138	6.05334	1.41876e-09	7.70281e-09
TP53	920.924	0.708653	0.105259	6.73247	1.66809e-11	1.07794e-10
RNF4	2522.62	0.70848	0.10986	6.44896	1.12623e-10	6.75516e-10
HSPA12A	2421.58	0.70843	0.0866117	8.17938	2.85296e-16	2.78031e-15
SLC33A1	4190.88	0.708353	0.0892556	7.93623	2.08427e-15	1.89553e-14
LINC01547	209.434	0.707392	0.179632	3.93799	8.21655e-05	0.000243277
GORASP1	2035.03	0.707291	0.0826485	8.55781	1.15028e-17	1.25263e-16
IP6K1	2574.64	0.707235	0.0802992	8.80749	1.27974e-18	1.50065e-17
LMBRD2	647.736	0.706947	0.116243	6.08162	1.18971e-09	6.49189e-09
AUH	509.234	0.706636	0.14243	4.96127	7.00338e-07	2.774e-06
CPEB4	1674.93	0.706494	0.0906675	7.79214	6.58815e-15	5.78616e-14
QPRT	2003.17	0.70648	0.133243	5.30219	1.14421e-07	4.99125e-07
ATP6V1D	3934.53	0.705921	0.0902563	7.82129	5.2284e-15	4.62689e-14
RALA	5327.75	0.705093	0.0758091	9.3009	1.39268e-20	1.89473e-19
LOC100507577	795.232	0.704698	0.145732	4.83556	1.32771e-06	5.06647e-06
HADHA	13346.2	0.704608	0.0769865	9.15236	5.57029e-20	7.23946e-19
TTLL7	2367.18	0.704487	0.117257	6.00804	1.87778e-09	1.00541e-08
ZNF32	145.331	0.704473	0.176907	3.98218	6.82867e-05	0.000204589
TRAK2	12637.3	0.704397	0.0761809	9.24638	2.32234e-20	3.10639e-19
LACE1	312.569	0.704309	0.129087	5.45609	4.86724e-08	2.2253e-07
DOPEY2	393.02	0.703991	0.141612	4.97127	6.65146e-07	2.63876e-06
NECAP2	1830.04	0.703603	0.0836587	8.41041	4.08592e-17	4.22137e-16
TXNRD2	600.102	0.703565	0.115734	6.07913	1.20837e-09	6.58895e-09
ZNF554	110.151	0.70348	0.194554	3.61587	0.000299345	0.000812171
GPRIN3	1075.28	0.703449	0.136701	5.14588	2.66273e-07	1.10965e-06
LOH12CR1	198.009	0.703279	0.159403	4.41196	1.02439e-05	3.46389e-05
LINC00938	250.823	0.703267	0.149274	4.71126	2.46191e-06	9.06939e-06
ATP5F1	8107.72	0.703248	0.0830499	8.46777	2.50132e-17	2.62262e-16
FAM195A	148.473	0.703225	0.217325	3.23583	0.0012129	0.00295742
PLEKHM3	988.927	0.703129	0.108642	6.47197	9.67308e-11	5.82504e-10
EVC	1567.89	0.70295	0.103133	6.81596	9.36371e-12	6.19941e-11
VAMP7	5198.66	0.702423	0.106783	6.57803	4.76733e-11	2.95079e-10
SMPD2	764.024	0.702363	0.116429	6.03257	1.6137e-09	8.70487e-09
ZBTB37	269.522	0.701706	0.140297	5.00157	5.68665e-07	2.27331e-06
XRRA1	1285.5	0.701102	0.0883105	7.93906	2.03722e-15	1.85386e-14
LUZP1	4986.16	0.700529	0.0987227	7.09593	1.28485e-12	9.27438e-12
QPCT	19655.8	0.700344	0.0813214	8.61205	7.17646e-18	7.94086e-17
SLC7A2	2941.57	0.700152	0.0879469	7.96108	1.70547e-15	1.56801e-14
SIPA1	1047.32	0.700011	0.123099	5.68657	1.29618e-08	6.3713e-08
ZNF564	349.253	0.699643	0.128598	5.44053	5.31228e-08	2.41129e-07
ALDOA	45407.4	0.699501	0.0782963	8.93402	4.10805e-19	5.01966e-18
GBAS	4263.02	0.69925	0.0745475	9.37993	6.60148e-21	9.29063e-20
SLC45A2	17950.8	0.699178	0.0866023	8.07344	6.83459e-16	6.48085e-15
WIPF2	1694.34	0.698576	0.105308	6.63363	3.27533e-11	2.05934e-10
SPIN1	2594.2	0.698426	0.0989593	7.05771	1.69268e-12	1.20399e-11
OSBPL7	206.323	0.69779	0.179962	3.87742	0.000105569	0.000307688
FAM3A	518.873	0.697778	0.112279	6.2147	5.14239e-10	2.91222e-09
NDUFS8	1233.48	0.697632	0.101897	6.84645	7.5705e-12	5.06095e-11
DYNC1LI2	9624.36	0.697526	0.0888086	7.85426	4.02125e-15	3.58169e-14
AVEN	165.825	0.697058	0.172062	4.0512	5.09557e-05	0.000155501
SLC8B1	308.813	0.696886	0.137182	5.08002	3.77398e-07	1.5459e-06
COQ5	900.863	0.696659	0.106752	6.52594	6.75752e-11	4.12441e-10
HEATR5B	2313.42	0.696299	0.0920972	7.56048	4.01593e-14	3.30975e-13
FASTKD1	2430.4	0.69603	0.108968	6.38745	1.68672e-10	9.96281e-10
LINC00667	1168.21	0.69599	0.0926683	7.51054	5.8882e-14	4.79268e-13
EIF1AY	2874.77	0.695872	0.105421	6.60088	4.08727e-11	2.54549e-10
ANXA6	6214.71	0.694988	0.0762863	9.11026	8.21819e-20	1.06169e-18
VDAC2	1759.17	0.694934	0.0856204	8.11645	4.80018e-16	4.58336e-15
TRIOBP	1254.28	0.694823	0.0991181	7.01005	2.38231e-12	1.66938e-11
HCFC2	735.803	0.694093	0.105684	6.56761	5.11306e-11	3.15702e-10
GGT7	1085.45	0.694052	0.12338	5.62532	1.85162e-08	8.91597e-08
FASTK	1591.6	0.693951	0.106487	6.51678	7.18319e-11	4.37798e-10
DNAH8	151.998	0.693745	0.190863	3.63479	0.000278209	0.00075946
DNAL4	242.093	0.69294	0.184686	3.75199	0.000175434	0.000494624
UGP2	11010.7	0.692104	0.0883846	7.8306	4.85529e-15	4.30679e-14
PSPH	1567.05	0.692077	0.116767	5.92697	3.08575e-09	1.61611e-08
LYSMD3	1337.94	0.69183	0.122816	5.63304	1.77062e-08	8.5532e-08
ZNF701	236.83	0.691157	0.165039	4.18783	2.8163e-05	8.9242e-05
FAM127B	1234.18	0.690808	0.0991012	6.97073	3.15295e-12	2.18109e-11
FAM217B	1511.46	0.690726	0.131028	5.27159	1.3525e-07	5.83922e-07
OSGIN1	1675.49	0.689925	0.122519	5.63117	1.78988e-08	8.64072e-08
DHDDS	2081.17	0.689601	0.0896739	7.69009	1.47034e-14	1.25277e-13
LOC728613	201.937	0.689506	0.165157	4.17484	2.9819e-05	9.40337e-05
NDUFA2	300.924	0.689421	0.141599	4.86884	1.12256e-06	4.32401e-06
CTAG2	512.656	0.688891	0.163542	4.21232	2.52761e-05	8.06178e-05
KIAA1191	2934.88	0.688506	0.0847699	8.12206	4.5833e-16	4.38737e-15
MCOLN1	1208.42	0.688398	0.098507	6.98832	2.78199e-12	1.93421e-11
HS1BP3	1660.69	0.688393	0.0976494	7.04964	1.79379e-12	1.27351e-11
PTPN1	9358.69	0.687922	0.0828575	8.30248	1.01963e-16	1.02608e-15
CMC4	76.0018	0.687522	0.229805	2.99176	0.00277374	0.00635229
IGSF3	11563.5	0.687299	0.100497	6.83901	7.97443e-12	5.31219e-11
ADAM8	46.6578	0.68689	0.282688	2.42985	0.0151049	0.0296508
ZNF319	339.355	0.686574	0.128068	5.36102	8.27516e-08	3.67447e-07
KIAA0232	1539.9	0.686323	0.105132	6.52821	6.6561e-11	4.06657e-10
AP5Z1	1264.11	0.685862	0.0906926	7.5625	3.95401e-14	3.26228e-13
ARHGAP17	3516.29	0.685828	0.0824789	8.31519	9.16031e-17	9.2367e-16
SIKE1	3976.97	0.685513	0.0821733	8.34228	7.28711e-17	7.39358e-16
BNC2	3384.45	0.685355	0.0804624	8.51771	1.62739e-17	1.74084e-16
PRDX5	6155.36	0.685144	0.104444	6.55993	5.3833e-11	3.31035e-10
GDPD1	332.874	0.684413	0.139982	4.88928	1.01204e-06	3.91927e-06
CASKIN2	662.97	0.684355	0.1052	6.50527	7.75521e-11	4.70008e-10
SBNO2	3309.79	0.68431	0.0808136	8.46775	2.50172e-17	2.62262e-16
ZNF446	204.326	0.683723	0.161606	4.23079	2.32869e-05	7.46357e-05
LOC100288152	83.9253	0.683178	0.247579	2.75943	0.00579015	0.0124617
SHISA4	239.76	0.683168	0.145428	4.69763	2.63198e-06	9.65357e-06
ZBTB11-AS1	413.451	0.683061	0.128503	5.31553	1.06348e-07	4.66469e-07
NEK9	4083.89	0.682722	0.122936	5.55346	2.80068e-08	1.32247e-07
PACS2	1470.76	0.682456	0.0986065	6.921	4.48457e-12	3.04922e-11
ZSCAN31	73.7222	0.682311	0.228298	2.98868	0.00280183	0.00640885
C1orf122	392.022	0.68213	0.141858	4.80853	1.52044e-06	5.74394e-06
CISD1	2842.87	0.682103	0.10753	6.34336	2.24802e-10	1.31446e-09
EIF5A2	1670.49	0.681744	0.111558	6.11114	9.89245e-10	5.43527e-09
TRIM26	2601.14	0.680568	0.0926553	7.34517	2.05503e-13	1.58398e-12
KIAA0319L	3748.03	0.680377	0.105753	6.43367	1.24559e-10	7.4592e-10
CIAPIN1	1646.73	0.680008	0.0917233	7.41368	1.22842e-13	9.65054e-13
DNASE2B	84.804	0.679487	0.243862	2.78636	0.00533037	0.0115626
TRO	452.146	0.679256	0.118037	5.75462	8.68345e-09	4.3446e-08
MEF2C	2910	0.679255	0.0963679	7.04857	1.80772e-12	1.2822e-11
ARHGAP31	3128.48	0.679217	0.0945766	7.18166	6.88705e-13	5.10283e-12
HDHD2	1300.01	0.67905	0.111388	6.09625	1.08589e-09	5.93878e-09
SEC24C	7584.65	0.679023	0.0961317	7.06346	1.62402e-12	1.15897e-11
TBC1D19	180.171	0.678616	0.160258	4.23451	2.2905e-05	7.35208e-05
GALM	1005.05	0.678607	0.0934818	7.25925	3.89252e-13	2.93883e-12
DLST	3775.26	0.678273	0.0800706	8.47094	2.4342e-17	2.5604e-16
TMEM138	1423	0.678229	0.0982971	6.89979	5.20808e-12	3.52373e-11
PAQR6	380.777	0.677885	0.165398	4.09851	4.15813e-05	0.000128659
IL13RA1	1299.31	0.677842	0.109312	6.20101	5.61016e-10	3.16763e-09
DTWD2	430.731	0.677821	0.148436	4.56642	4.96114e-06	1.75082e-05
RNF115	1871.63	0.67772	0.0897592	7.55042	4.33845e-14	3.56002e-13
WDTC1	1742.06	0.677193	0.106389	6.36527	1.94948e-10	1.14789e-09
PCCA	640.41	0.677077	0.109738	6.16992	6.83233e-10	3.81636e-09
C17orf97	109.726	0.676884	0.202673	3.33978	0.000838458	0.00210485
CYCS	9862.12	0.676801	0.0917638	7.37546	1.63777e-13	1.27143e-12
PPFIBP2	509.912	0.676757	0.129645	5.2201	1.78828e-07	7.60761e-07
HAGH	672.281	0.676378	0.115287	5.8669	4.44028e-09	2.2867e-08
PRDM15	1420.69	0.676151	0.0901474	7.50051	6.35714e-14	5.15771e-13
FAM172A	870.937	0.675811	0.105664	6.39582	1.59684e-10	9.45449e-10
CHCHD10	1034.87	0.675582	0.143016	4.72383	2.31447e-06	8.53873e-06
SIRT5	723.433	0.675574	0.107137	6.30567	2.86943e-10	1.66238e-09
BTBD2	2879.12	0.675498	0.0862777	7.82935	4.90391e-15	4.34737e-14
PRKCA	788.048	0.675482	0.144609	4.67108	2.99627e-06	1.09261e-05
HES6	3274.58	0.675132	0.132327	5.102	3.36086e-07	1.3823e-06
C6orf47	1062.81	0.674894	0.0965571	6.98958	2.75702e-12	1.91773e-11
ZBTB42	81.8753	0.674501	0.236976	2.84628	0.00442332	0.00973619
HSD11B1L	52.7861	0.674014	0.26968	2.49931	0.0124434	0.0249215
CDC37L1	406.798	0.673915	0.121377	5.55224	2.82025e-08	1.33088e-07
PPCS	954.907	0.672936	0.120666	5.57686	2.44898e-08	1.1633e-07
SIPA1L1	56.9332	0.67259	0.27038	2.48757	0.0128619	0.025661
KLHL18	1250.59	0.672587	0.0971448	6.92355	4.40473e-12	2.99629e-11
TNFAIP1	2715.41	0.672356	0.0813028	8.26978	1.34206e-16	1.33807e-15
SCD	48067.1	0.672354	0.087921	7.64725	2.05325e-14	1.73476e-13
CORO1B	4291.06	0.672298	0.0796455	8.44113	3.14277e-17	3.2738e-16
CDK2AP2	720.415	0.672249	0.125534	5.35511	8.55029e-08	3.79107e-07
UEVLD	940.433	0.672139	0.114455	5.87254	4.29178e-09	2.214e-08
CALM3	6247.14	0.672056	0.0837257	8.02688	9.99849e-16	9.36352e-15
MIR646HG	87.9993	0.671323	0.240994	2.78565	0.00534208	0.0115814
HEXA	5891.25	0.67132	0.0757585	8.86132	7.90742e-19	9.47074e-18
GPAT4	11676.7	0.671144	0.0968262	6.93143	4.16601e-12	2.83901e-11
SPATA20	2140.48	0.670674	0.0959218	6.99188	2.71231e-12	1.88924e-11
CAMK1G	50.4949	0.67059	0.271229	2.47241	0.0134204	0.0266697
NAGLU	1478.98	0.669848	0.126545	5.29335	1.20098e-07	5.21933e-07
NDUFA9	1742.11	0.669015	0.0938428	7.12911	1.01023e-12	7.36596e-12
ATP6V1F	3261.14	0.668989	0.0835919	8.00304	1.21381e-15	1.12972e-14
NR1H2	852.924	0.668529	0.103731	6.44487	1.15701e-10	6.937e-10
PAX8	48.7372	0.668432	0.277237	2.41105	0.0159065	0.031071
RSG1	40.7047	0.668423	0.299036	2.23525	0.0254006	0.0471891
SEC31A	7664.65	0.66833	0.115814	5.77071	7.89386e-09	3.96712e-08
HCN1	92.69	0.668005	0.220611	3.02797	0.00246201	0.00569988
PITPNM1	1500.77	0.667864	0.10101	6.61189	3.79443e-11	2.37485e-10
TMEM55A	644.947	0.667829	0.123774	5.39555	6.8315e-08	3.06768e-07
NDUFB2	434.888	0.667515	0.139305	4.79174	1.65341e-06	6.21675e-06
KLHDC10	1857.39	0.667443	0.108264	6.16497	7.04972e-10	3.92907e-09
DDX60L	203.574	0.667351	0.160671	4.15351	3.27412e-05	0.000102758
PIP4K2A	9389.95	0.667322	0.0740758	9.00863	2.08638e-19	2.60625e-18
TET2	1375.66	0.66726	0.0982237	6.79326	1.09625e-11	7.19798e-11
SERINC1	6968.33	0.667252	0.0976908	6.83025	8.47688e-12	5.63696e-11
PFKP	8158.77	0.666825	0.0792805	8.41096	4.06676e-17	4.20733e-16
PRKACB	6084.63	0.666572	0.0722879	9.22108	2.94121e-20	3.89285e-19
PPP1R37	1041.87	0.666359	0.117102	5.69042	1.26728e-08	6.23734e-08
IDH3G	2099.3	0.665751	0.0872764	7.62807	2.38292e-14	1.99877e-13
THEM6	576.444	0.665704	0.122146	5.45007	5.03513e-08	2.29442e-07
FAM179B	1225.88	0.665626	0.0919937	7.23556	4.63606e-13	3.47589e-12
VPS11	4086.9	0.665496	0.0948166	7.01877	2.23829e-12	1.57065e-11
TRIM32	2369.77	0.665409	0.084398	7.88417	3.16627e-15	2.84194e-14
IBA57	146.212	0.665112	0.188009	3.53766	0.000403685	0.00107141
MTFP1	1104.4	0.664759	0.104693	6.34962	2.15842e-10	1.26402e-09
SH3BGRL	1990.15	0.664706	0.0935075	7.10859	1.17237e-12	8.51124e-12
ZFYVE16	31810.6	0.664622	0.0836183	7.94829	1.89105e-15	1.72812e-14
WSCD1	777.04	0.664248	0.104823	6.33688	2.34461e-10	1.36935e-09
PLEKHG3	2156.99	0.663136	0.0859816	7.71253	1.23348e-14	1.05812e-13
SLC18B1	3083.61	0.662942	0.0872366	7.59936	2.97603e-14	2.47839e-13
GPC5	1782.38	0.662918	0.116869	5.67231	1.40883e-08	6.89027e-08
LINC00472	166.594	0.662571	0.202756	3.26782	0.0010838	0.00266584
KCNS3	920.543	0.662355	0.0976161	6.78531	1.15841e-11	7.59298e-11
LGALS3BP	10835.2	0.662056	0.0755176	8.76691	1.83641e-18	2.13027e-17
CLTB	830.772	0.661932	0.124964	5.29697	1.17743e-07	5.12435e-07
C10orf11	94.8637	0.661833	0.215179	3.07573	0.00209989	0.0049232
SOS2	2296.51	0.661404	0.0942348	7.01867	2.23984e-12	1.57101e-11
SH3BGRL3	2535.77	0.661381	0.0976078	6.77591	1.23625e-11	8.05083e-11
MMP25-AS1	49.4705	0.661305	0.279967	2.36209	0.0181724	0.0349594
RNASEK	60.0481	0.661262	0.277293	2.3847	0.0170929	0.033174
DOPEY1	673.471	0.660851	0.108325	6.10062	1.0566e-09	5.79063e-09
SDHAP3	222.873	0.660695	0.155244	4.25585	2.08258e-05	6.72756e-05
LAPTM4A	3697.9	0.660428	0.0797308	8.28323	1.19881e-16	1.19921e-15
UNC45A	2669.32	0.660113	0.0948789	6.95743	3.46545e-12	2.38417e-11
CAT	2161.65	0.660045	0.0878898	7.50991	5.9169e-14	4.81086e-13
OCRL	2113.14	0.659944	0.0838778	7.86792	3.60588e-15	3.22121e-14
SMARCA2	1598.02	0.659924	0.0835262	7.9008	2.77114e-15	2.50065e-14
TUBB2A	1590.61	0.65968	0.134803	4.89367	9.89716e-07	3.83874e-06
LIMK1	1166.06	0.659606	0.0923033	7.14607	8.93003e-13	6.5523e-12
ABL1	5476.17	0.659534	0.0803478	8.2085	2.23976e-16	2.19974e-15
KANSL3	4630.1	0.659434	0.0917359	7.1884	6.5556e-13	4.8644e-12
TIMM17A	4031.72	0.658985	0.113721	5.79476	6.84209e-09	3.46344e-08
ACVR2B-AS1	88.9631	0.658927	0.27459	2.39967	0.0164096	0.0319711
GNAO1	2202.86	0.658628	0.0922385	7.14048	9.30022e-13	6.814e-12
MGRN1	3390.58	0.658584	0.0789455	8.34226	7.28841e-17	7.39358e-16
ABCA2	1533.87	0.658076	0.169803	3.87553	0.000106391	0.000310025
SEPHS2	8224.31	0.657984	0.0843772	7.79813	6.28319e-15	5.52475e-14
RHBDD1	70.5783	0.657762	0.235018	2.79877	0.00512984	0.0111613
STOML1	149.662	0.657452	0.168773	3.89547	9.80083e-05	0.000287148
STARD10	923.355	0.656842	0.119112	5.51448	3.49817e-08	1.63244e-07
ARL4A	693.614	0.655978	0.151947	4.31715	1.58055e-05	5.20595e-05
ATPAF1	3254.58	0.655515	0.0940449	6.97024	3.16404e-12	2.18776e-11
WDR7	1026.03	0.65481	0.0967486	6.76816	1.30426e-11	8.47183e-11
GXYLT2	124.724	0.654172	0.185779	3.52124	0.000429535	0.00113286
ABCA11P	74.777	0.654099	0.256368	2.55141	0.0107289	0.0218231
LOC642852	1082.03	0.654079	0.113329	5.7715	7.85675e-09	3.95191e-08
MEIS1	235.344	0.653815	0.151645	4.31147	1.62172e-05	5.32991e-05
KLHL7	1533.69	0.653239	0.0888183	7.35478	1.91243e-13	1.47708e-12
CKB	5802.21	0.653009	0.104499	6.24898	4.13134e-10	2.36266e-09
LOC103611081	264.786	0.652818	0.147337	4.43078	9.38925e-06	3.19205e-05
GOT2	4231.75	0.652517	0.0814835	8.00796	1.16623e-15	1.08611e-14
SNX29	1485.86	0.652413	0.133189	4.89839	9.66268e-07	3.7555e-06
PIP4K2C	1798.95	0.652368	0.0976317	6.68192	2.35828e-11	1.50339e-10
UHMK1	6933.28	0.652334	0.108139	6.03235	1.61595e-09	8.71393e-09
SWI5	708.724	0.652302	0.107664	6.05866	1.37261e-09	7.45489e-09
DNAJC30	317.248	0.651135	0.149417	4.35783	1.31361e-05	4.37145e-05
PLEKHH1	9672.75	0.650186	0.118604	5.48197	4.2062e-08	1.94246e-07
MRPL54	118.315	0.649779	0.195223	3.3284	0.000873472	0.00218296
PARS2	374.049	0.649524	0.147067	4.41654	1.00296e-05	3.39675e-05
NRSN2	4138.41	0.649427	0.092893	6.99113	2.72684e-12	1.89762e-11
AIFM2	1639.53	0.648604	0.0917888	7.06627	1.59151e-12	1.13793e-11
KIFAP3	1056.69	0.648506	0.0987956	6.56412	5.23416e-11	3.22652e-10
TMEM260	929.114	0.648273	0.111806	5.7982	6.70303e-09	3.39418e-08
COX10	1100.15	0.64788	0.104504	6.1996	5.6607e-10	3.19378e-09
ATG4A	472.306	0.647789	0.141086	4.59145	4.40168e-06	1.56508e-05
SIGIRR	116.37	0.647612	0.223798	2.89374	0.00380685	0.00848444
KIF3B	3165.16	0.646841	0.0915664	7.06417	1.61578e-12	1.15364e-11
MIEF1	5689.08	0.646513	0.0793118	8.15154	3.59323e-16	3.46155e-15
C10orf76	816.289	0.646418	0.100677	6.42071	1.35643e-10	8.08455e-10
SLC25A6	17862.2	0.646237	0.0812123	7.95739	1.75712e-15	1.61354e-14
GAREM	839.921	0.646226	0.0965834	6.69086	2.21861e-11	1.41974e-10
APBB2	813.251	0.646076	0.0983228	6.57097	4.99874e-11	3.09022e-10
HTT	4872.63	0.645871	0.114082	5.66145	1.50101e-08	7.31155e-08
BAIAP2	850.52	0.645287	0.105379	6.1235	9.15415e-10	5.04982e-09
CCDC53	1160.56	0.644855	0.111519	5.78247	7.36096e-09	3.71117e-08
DCAF11	2043.94	0.644817	0.0999179	6.45347	1.09317e-10	6.55943e-10
NDUFA3	800.389	0.644647	0.132578	4.86239	1.15974e-06	4.46043e-06
MAPRE3	185.978	0.643966	0.242226	2.65853	0.00784828	0.0164303
MET	29304.3	0.643866	0.0899971	7.1543	8.41003e-13	6.18577e-12
ECH1	2017.83	0.64377	0.0933409	6.89697	5.31233e-12	3.59105e-11
CITED1	153.36	0.643524	0.170295	3.77888	0.000157533	0.00044682
PCYOX1L	60.8896	0.643206	0.250046	2.57235	0.0101012	0.0206714
ZFP41	265.817	0.642709	0.1433	4.48504	7.28987e-06	2.50937e-05
TMEM115	1456.12	0.642101	0.0880897	7.28917	3.11868e-13	2.37356e-12
GBF1	3809.24	0.641925	0.0838027	7.65995	1.86008e-14	1.57508e-13
TIGD2	552.97	0.640956	0.118453	5.41106	6.26522e-08	2.82346e-07
SVIL-AS1	610.726	0.640654	0.113113	5.66385	1.4801e-08	7.21438e-08
IKBKE	321.989	0.638516	0.133896	4.76876	1.85361e-06	6.92126e-06
LINC01420	734.128	0.637696	0.103283	6.17425	6.64791e-10	3.71885e-09
KCNH1	248.102	0.637621	0.142036	4.48917	7.15027e-06	2.46468e-05
CD274	163.155	0.637388	0.204098	3.12295	0.00179047	0.0042525
LAGE3	152.918	0.637336	0.238639	2.67071	0.00756906	0.0158898
PEX12	420.987	0.63728	0.127346	5.00433	5.60555e-07	2.24326e-06
TRIM23	857.568	0.637252	0.101243	6.29428	3.08822e-10	1.7823e-09
FAM109A	353.437	0.636719	0.179668	3.54387	0.0003943	0.00104761
MBD5	572.167	0.636248	0.121919	5.21861	1.80268e-07	7.66455e-07
PHPT1	404.254	0.63614	0.13296	4.78444	1.71461e-06	6.43243e-06
ZDHHC1	122.116	0.635518	0.206331	3.08009	0.00206941	0.00486003
DHRSX	256.266	0.63549	0.144396	4.40102	1.07745e-05	3.62953e-05
RHOG	856.066	0.635356	0.103107	6.16209	7.17931e-10	3.99983e-09
DST	12231.1	0.635133	0.129835	4.89184	9.98974e-07	3.87167e-06
SLC24A1	662.686	0.63484	0.118849	5.34155	9.21555e-08	4.06865e-07
BCL10	1484.92	0.634734	0.094192	6.73873	1.59775e-11	1.03382e-10
CRTC3	3846.81	0.634522	0.0824921	7.69191	1.44958e-14	1.23578e-13
ARFGEF1	2524.31	0.634329	0.0821581	7.72084	1.15567e-14	9.94762e-14
RNF43	338.254	0.633679	0.131367	4.82374	1.40888e-06	5.34517e-06
GREB1	6044.41	0.633665	0.0779645	8.1276	4.3787e-16	4.19417e-15
SLC35D1	877.472	0.633507	0.145726	4.34724	1.37861e-05	4.57368e-05
FBXL5	1261.84	0.632698	0.0891119	7.10004	1.24718e-12	9.01601e-12
MAST1	654.939	0.632358	0.174111	3.63192	0.000281324	0.000767686
ZSCAN23	152.163	0.632221	0.201088	3.144	0.00166653	0.00397815
ENPP1	1448.13	0.631337	0.0995832	6.3398	2.30067e-10	1.34473e-09
MOB3A	618.239	0.631197	0.127458	4.95222	7.33732e-07	2.89944e-06
NGRN	5394.22	0.63101	0.107324	5.8795	4.11496e-09	2.12424e-08
PPIP5K2	4276.72	0.630573	0.119636	5.27077	1.35851e-07	5.86014e-07
PLA2G15	473.625	0.630526	0.132288	4.7663	1.87644e-06	6.99959e-06
MYPOP	265.466	0.630364	0.154168	4.08881	4.33583e-05	0.000133829
MICU3	263.893	0.630021	0.13576	4.6407	3.47223e-06	1.25377e-05
ZNF550	1070.71	0.629889	0.106345	5.92307	3.15981e-09	1.65261e-08
SH2B1	2009.94	0.629719	0.120518	5.22511	1.7405e-07	7.41895e-07
SYNRG	2177.23	0.629658	0.0859018	7.32998	2.30191e-13	1.76795e-12
SLC39A7	9153.44	0.629123	0.0711956	8.83653	9.87344e-19	1.17049e-17
ARSA	1107.59	0.628909	0.145465	4.32345	1.53608e-05	5.07051e-05
TTC3	21301.6	0.628559	0.113141	5.55552	2.76792e-08	1.30823e-07
LINC00645	100.702	0.62833	0.215715	2.91277	0.00358237	0.008029
NCOA2	2119.56	0.628159	0.0898175	6.99373	2.67682e-12	1.86538e-11
WBP1L	1383.93	0.627933	0.0887622	7.07433	1.50174e-12	1.07679e-11
UBA1	11940.8	0.62774	0.0840341	7.47007	8.01549e-14	6.42728e-13
ZNF438	428.23	0.627727	0.124944	5.02406	5.05915e-07	2.03917e-06
ARHGEF12	10677.3	0.627695	0.0984906	6.37315	1.85182e-10	1.09209e-09
SUFU	514.987	0.627468	0.109075	5.75261	8.78737e-09	4.39369e-08
SMIM12	2592.44	0.627211	0.0786013	7.97965	1.46753e-15	1.35834e-14
TSPAN9	490.809	0.62685	0.117292	5.34433	9.07503e-08	4.01314e-07
HMOX2	2896.48	0.626822	0.100107	6.26154	3.81182e-10	2.18655e-09
DNAJC5	2484.23	0.626599	0.0883136	7.09515	1.29207e-12	9.32202e-12
CABLES2	558.222	0.62644	0.106688	5.87171	4.31334e-09	2.22361e-08
PLD3	1863.66	0.626264	0.107959	5.80092	6.59509e-09	3.34288e-08
LPGAT1	5251.1	0.625794	0.0867398	7.21461	5.409e-13	4.03539e-12
DNAJC27	324.508	0.625451	0.196787	3.17832	0.00148132	0.00356815
PEX16	292.2	0.625292	0.14809	4.22237	2.41746e-05	7.7284e-05
UQCR11	1216.11	0.624556	0.108004	5.7827	7.35109e-09	3.70743e-08
ZBTB47	584.459	0.62414	0.131136	4.7595	1.94075e-06	7.22169e-06
USP22	10886.2	0.623712	0.115102	5.41878	6.00083e-08	2.71159e-07
TOB2	2059.68	0.623626	0.09577	6.5117	7.43034e-11	4.52314e-10
TADA2B	641.295	0.623612	0.106745	5.84208	5.15527e-09	2.63874e-08
CCDC113	339.933	0.623553	0.13824	4.51065	6.46279e-06	2.24512e-05
USP38	1626.84	0.623547	0.101432	6.14745	7.87366e-10	4.36575e-09
SCART1	96.0326	0.623509	0.277975	2.24304	0.0248942	0.0463732
TRAPPC1	1415.96	0.623282	0.0882908	7.05942	1.67204e-12	1.19212e-11
ZNF449	532.815	0.622957	0.11055	5.63508	1.7498e-08	8.45531e-08
PLEKHB2	3836.44	0.6223	0.111271	5.59266	2.23614e-08	1.06757e-07
LINC01521	514.784	0.622184	0.15863	3.92224	8.77294e-05	0.000258536
KCTD11	95.6012	0.622138	0.240471	2.58716	0.00967699	0.0198977
TMEM80	142.13	0.621645	0.197118	3.15368	0.00161228	0.00385962
COL18A1	54.8802	0.621294	0.262293	2.36871	0.0178504	0.0344143
TBCEL	894.752	0.621171	0.110522	5.62036	1.90556e-08	9.15818e-08
ZNF358	1061.4	0.621037	0.11107	5.59139	2.25265e-08	1.07432e-07
SYS1	707.904	0.620371	0.105113	5.90192	3.59288e-09	1.86585e-08
ANKRD9	384.177	0.620037	0.186729	3.32052	0.000898507	0.00224034
TRIB2	11700.1	0.620018	0.0887502	6.98611	2.82618e-12	1.96404e-11
TBC1D5	3515.94	0.619841	0.10419	5.94914	2.69548e-09	1.41761e-08
EIF4G2	42193.1	0.619627	0.126247	4.90805	9.19849e-07	3.58986e-06
NCAM2	1836.91	0.619496	0.145473	4.25851	2.05797e-05	6.6523e-05
COQ10A	431.765	0.619305	0.160232	3.86504	0.000111071	0.00032242
EXOC4	3087.34	0.619223	0.095006	6.51772	7.1383e-11	4.35238e-10
DENND1B	355.68	0.618718	0.1298	4.76669	1.87273e-06	6.9875e-06
FAM195B	844.712	0.618064	0.118981	5.19466	2.05097e-07	8.65692e-07
DCAF8	5961.13	0.617724	0.0846956	7.29346	3.02089e-13	2.30377e-12
THAP9	258.133	0.617643	0.153736	4.01756	5.88032e-05	0.000177833
WDR11	1976.43	0.617473	0.0882554	6.99643	2.62571e-12	1.8323e-11
SAMD5	263.374	0.617317	0.136625	4.51833	6.23287e-06	2.16874e-05
GATB	1532.63	0.617213	0.087802	7.02961	2.07117e-12	1.45812e-11
CDK16	4504.95	0.617012	0.0753596	8.18757	2.66553e-16	2.60268e-15
HECTD3	2897.07	0.616772	0.0815325	7.56474	3.88652e-14	3.20834e-13
PQLC3	188.31	0.616437	0.181432	3.39762	0.000679738	0.00173522
RAB11B	1067.78	0.616251	0.106202	5.80262	6.52871e-09	3.31035e-08
ZYG11B	3003.44	0.615901	0.0918214	6.70759	1.97859e-11	1.27315e-10
WDR44	929.088	0.615861	0.105549	5.83485	5.38401e-09	2.74911e-08
TMEM53	129.356	0.615051	0.192304	3.19833	0.00138227	0.00334396
SNAI3-AS1	61.6369	0.614851	0.260226	2.36276	0.0181396	0.0349054
ERVK13-1	498.556	0.61479	0.121914	5.04282	4.58719e-07	1.86035e-06
UBE2Q2	1237.26	0.6139	0.0991706	6.19034	6.00341e-10	3.37957e-09
TRIP6	1243.59	0.613276	0.115842	5.29408	1.19615e-07	5.19981e-07
LSS	3340.88	0.613087	0.0829911	7.38738	1.49754e-13	1.16617e-12
BPHL	421.446	0.612856	0.146358	4.18736	2.82216e-05	8.94088e-05
AFF4	7418.19	0.612797	0.0730378	8.39014	4.85584e-17	4.98953e-16
GPR143	2898.76	0.612633	0.0795984	7.69654	1.39798e-14	1.19516e-13
UBE2H	3147.4	0.61251	0.0952147	6.43293	1.25166e-10	7.4912e-10
KRT10	219.341	0.612411	0.167858	3.64838	0.000263897	0.000723526
ULBP2	68.3884	0.612223	0.240652	2.54402	0.0109586	0.0222485
FGD6	545.132	0.61212	0.117611	5.20459	1.94424e-07	8.22709e-07
FAM229B	118.443	0.61105	0.187645	3.25641	0.00112831	0.00276723
ZNF320	152.706	0.611027	0.183615	3.32777	0.000875452	0.00218682
CUL9	1308.08	0.610423	0.139649	4.37112	1.23612e-05	4.12542e-05
SACM1L	3571.64	0.609843	0.0861853	7.07595	1.48428e-12	1.06478e-11
CLTC	28044.1	0.609815	0.076298	7.99254	1.3219e-15	1.22761e-14
NAA30	1215.24	0.609544	0.0974682	6.25377	4.00662e-10	2.29481e-09
C22orf34	162.08	0.609447	0.164554	3.70363	0.000212534	0.000592267
OXSM	389.5	0.609352	0.128548	4.74026	2.13441e-06	7.9092e-06
DPP8	2537.22	0.609202	0.0957994	6.35914	2.0288e-10	1.19228e-09
CAB39L	988.732	0.608901	0.110491	5.51088	3.57048e-08	1.66362e-07
MITF	56325	0.608066	0.0758528	8.01639	1.089e-15	1.01607e-14
MFAP3	2501.32	0.608055	0.101771	5.97476	2.30435e-09	1.2204e-08
RABIF	654.871	0.607714	0.13121	4.63163	3.62803e-06	1.30815e-05
TFE3	1183.88	0.607539	0.0917876	6.61897	3.61721e-11	2.26807e-10
NEURL2	75.0628	0.607258	0.256055	2.37159	0.0177118	0.0341786
TRPT1	245.09	0.606961	0.15725	3.85985	0.000113457	0.000328714
NDNL2	1103.32	0.606449	0.0890312	6.81165	9.64842e-12	6.37116e-11
C8orf82	126.229	0.606324	0.217141	2.7923	0.00523341	0.011367
ZNF211	611.159	0.606111	0.109951	5.51254	3.53691e-08	1.64899e-07
RNF170	802.962	0.605167	0.0970574	6.23515	4.51355e-10	2.56764e-09
STAG3L4	344.654	0.604884	0.131674	4.59381	4.35224e-06	1.54932e-05
LMLN	3545.64	0.604845	0.113126	5.34665	8.95956e-08	3.96556e-07
NEB	75.1414	0.604723	0.243063	2.48792	0.0128491	0.0256389
GFM2	3514.48	0.604583	0.100498	6.0159	1.7889e-09	9.60197e-09
COX6C	3017.6	0.604414	0.0904092	6.68532	2.30422e-11	1.47141e-10
VCPIP1	1710.06	0.604202	0.0876468	6.8936	5.43977e-12	3.67227e-11
WNK3	359.64	0.604124	0.126259	4.78479	1.71169e-06	6.42309e-06
ZNF815P	122.732	0.603627	0.194764	3.09927	0.00193995	0.00458091
NUDT22	640.549	0.603292	0.120593	5.0027	5.65343e-07	2.26122e-06
PKNOX1	793.598	0.602566	0.108262	5.56579	2.6096e-08	1.23572e-07
USO1	8816.77	0.602473	0.106987	5.63128	1.78873e-08	8.63791e-08
ZDHHC23	124.921	0.602452	0.194774	3.09308	0.00198093	0.00467255
APH1A	4985.43	0.602358	0.0744249	8.0935	5.79756e-16	5.51827e-15
ZBTB41	1954.66	0.602302	0.120309	5.00629	5.54898e-07	2.22239e-06
LTBP1	581.702	0.602198	0.137999	4.36377	1.27841e-05	4.25996e-05
PQLC2	705.798	0.602008	0.107103	5.62084	1.90031e-08	9.13587e-08
TCEAL1	392.544	0.60161	0.143341	4.19704	2.70428e-05	8.59805e-05
NMT2	327.941	0.601497	0.133383	4.50954	6.49686e-06	2.25436e-05
SLC4A11	208.058	0.601364	0.158535	3.79327	0.000148677	0.000423292
CCDC22	554.132	0.600288	0.111495	5.38398	7.28583e-08	3.25718e-07
TRIM2	3281.49	0.600139	0.093511	6.41784	1.38217e-10	8.23148e-10
MON2	3008.59	0.600104	0.0844884	7.10279	1.22259e-12	8.85878e-12
PGAP3	53.5412	0.599995	0.2684	2.23545	0.0253878	0.0471753
RNF139	1497.44	0.599995	0.0974588	6.15639	7.44204e-10	4.1401e-09
ABCC2	8930.77	0.599739	0.0722295	8.30325	1.01305e-16	1.02013e-15
TBC1D13	938.005	0.599617	0.10571	5.67229	1.40905e-08	6.89027e-08
CRY2	288.745	0.599546	0.139449	4.29939	1.71265e-05	5.60562e-05
FGFR1	2319.4	0.599249	0.101637	5.89599	3.72446e-09	1.93123e-08
LINC01140	92.8314	0.598724	0.242855	2.46536	0.0136876	0.0271543
RNF146	706.536	0.59855	0.101762	5.88184	4.05723e-09	2.09515e-08
PLBD2	1839.43	0.598035	0.0840154	7.11816	1.09377e-12	7.95209e-12
SEPT8	1785.57	0.597916	0.0997465	5.99436	2.04294e-09	1.08921e-08
WDR47	1315.01	0.597876	0.0881939	6.77911	1.20922e-11	7.89178e-11
ATPAF2	220.099	0.596914	0.154394	3.86618	0.000110555	0.000321107
ACOX1	1885.09	0.596237	0.0927872	6.42585	1.31136e-10	7.83759e-10
DCAF7	7022.43	0.59605	0.0761138	7.83103	4.83888e-15	4.29476e-14
OTUB2	179.312	0.595999	0.161327	3.69436	0.000220438	0.000613048
LDB1	2666.57	0.595855	0.0817463	7.28908	3.12086e-13	2.37402e-12
POLR3B	1674.39	0.59524	0.138527	4.29692	1.73191e-05	5.65884e-05
PIP5K1B	788.868	0.595184	0.118705	5.01398	5.33166e-07	2.14159e-06
RFK	1545.87	0.595131	0.0990626	6.00762	1.88265e-09	1.00766e-08
ZNF252P	1206.13	0.595015	0.0926545	6.42187	1.34613e-10	8.03269e-10
GPC1	589.462	0.594745	0.12111	4.91077	9.07202e-07	3.54188e-06
HERC2	6601.71	0.59456	0.0957742	6.20793	5.36857e-10	3.0369e-09
ABHD8	375.435	0.594498	0.17881	3.32475	0.000884977	0.00220952
CHD6	4792.05	0.594068	0.0981625	6.05188	1.43165e-09	7.76997e-09
MIEN1	412.107	0.594062	0.12786	4.64619	3.38117e-06	1.22322e-05
PPP1R21	716.148	0.59391	0.103544	5.73583	9.70383e-09	4.82478e-08
NME6	486.149	0.593866	0.114842	5.17115	2.3266e-07	9.76306e-07
ATP5O	4297.04	0.593749	0.0759836	7.81417	5.53255e-15	4.88461e-14
BRE	1047.31	0.593208	0.0976193	6.07675	1.22645e-09	6.68029e-09
FADD	830.321	0.593141	0.112035	5.29425	1.19503e-07	5.19794e-07
GOLGA2	3646.02	0.592819	0.080765	7.34005	2.13514e-13	1.64321e-12
SLC27A4	1658.58	0.592758	0.0923788	6.4166	1.39353e-10	8.29586e-10
MKL2	2633.24	0.592516	0.0890139	6.65644	2.80534e-11	1.77789e-10
HMGN3-AS1	93.0163	0.592494	0.206638	2.86731	0.00413983	0.00915487
VPS53	3078.3	0.591919	0.0885148	6.68723	2.27433e-11	1.45294e-10
FAM227B	60.4081	0.591696	0.243588	2.42908	0.015137	0.0297099
FST	94.433	0.591237	0.214636	2.7546	0.00587634	0.012622
SPRYD3	692.082	0.591178	0.121237	4.87621	1.08145e-06	4.17418e-06
SLC31A1	6237.72	0.591004	0.0810829	7.28889	3.12523e-13	2.37615e-12
DDI2	605.644	0.590983	0.1109	5.32898	9.8768e-08	4.34548e-07
TBC1D2B	1582.27	0.590671	0.102525	5.76122	8.35092e-09	4.18817e-08
TRAPPC5	187.86	0.590365	0.176468	3.34544	0.000821517	0.00206609
MOB3C	263.913	0.59029	0.166425	3.54688	0.000389819	0.0010376
FEM1B	12225.6	0.589947	0.0787515	7.49125	6.82214e-14	5.50249e-13
HECTD4	1826.13	0.589928	0.102814	5.73784	9.58892e-09	4.77079e-08
DSE	53.735	0.589891	0.25945	2.27362	0.0229889	0.0431649
PEF1	1100.56	0.589778	0.103059	5.72272	1.0483e-08	5.1934e-08
KIF16B	2814.37	0.589383	0.077904	7.5655	3.86365e-14	3.1912e-13
HTR7P1	87.2591	0.589352	0.265001	2.22396	0.0261514	0.0483876
SEPW1	417.363	0.589169	0.123866	4.75651	1.96966e-06	7.32203e-06
WDR13	1156.94	0.588688	0.0999255	5.89127	3.83244e-09	1.98381e-08
MAGEE1	49.5072	0.588509	0.265806	2.21406	0.026825	0.0494402
ZDHHC5	4711.72	0.588476	0.0846056	6.95552	3.5126e-12	2.41441e-11
EXOC7	4724.06	0.587659	0.0895852	6.55978	5.38887e-11	3.31109e-10
YAE1D1	1158.17	0.587452	0.115748	5.07528	3.86932e-07	1.58281e-06
COX7A2L	3682.23	0.587161	0.0774271	7.5834	3.36618e-14	2.79099e-13
RNH1	2945.9	0.586704	0.0837365	7.00655	2.44261e-12	1.71006e-11
TYSND1	828.92	0.586693	0.100688	5.82686	5.64792e-09	2.87629e-08
KDSR	1371.43	0.586601	0.0923688	6.35064	2.14418e-10	1.25715e-09
CLIP2	490.235	0.58653	0.1425	4.11601	3.85485e-05	0.000119835
TRAPPC12	1127.9	0.586449	0.0956338	6.13223	8.66551e-10	4.79169e-09
SLC25A29	279.384	0.586385	0.186972	3.13621	0.00171144	0.00407761
ADAM11	233.815	0.586357	0.195003	3.00691	0.0026392	0.00606623
CCSER2	1596.77	0.586317	0.0902737	6.49489	8.30967e-11	5.02805e-10
HERC3	1544.9	0.586153	0.104209	5.62479	1.85729e-08	8.93756e-08
PRMT2	2861.58	0.585587	0.0833378	7.02667	2.11527e-12	1.48708e-11
ERCC4	1885.06	0.58557	0.0921496	6.35456	2.09026e-10	1.22696e-09
ITPRIPL2	1625.64	0.58509	0.0954027	6.13285	8.63179e-10	4.7756e-09
SLC25A39	2730.66	0.584872	0.0959177	6.09765	1.07642e-09	5.89067e-09
PLEKHM1	663.509	0.584769	0.107415	5.44404	5.20847e-08	2.36841e-07
DMAP1	825.128	0.584635	0.104425	5.59863	2.16049e-08	1.03243e-07
SNAP29	2711.93	0.584609	0.0798608	7.32035	2.4732e-13	1.89278e-12
SKAP2	1843.88	0.584607	0.0864862	6.75954	1.38433e-11	8.97259e-11
FAM200A	827.081	0.584603	0.101472	5.76121	8.35141e-09	4.18817e-08
FBXL2	190.625	0.584461	0.17986	3.24953	0.00115595	0.00282813
NT5DC3	1828.11	0.584339	0.0891289	6.5561	5.52319e-11	3.39224e-10
ABHD16A	550.448	0.583772	0.111603	5.23078	1.68797e-07	7.20113e-07
TINF2	706.258	0.583765	0.100084	5.83276	5.45191e-09	2.77834e-08
UBE3B	2085.86	0.583711	0.0894411	6.52621	6.74567e-11	4.11963e-10
CACNA2D1	2609.53	0.583351	0.111016	5.25465	1.48304e-07	6.37366e-07
ARL2BP	1458.77	0.583208	0.109247	5.33841	9.37636e-08	4.13671e-07
STT3B	19612.2	0.582729	0.102831	5.66686	1.45438e-08	7.10044e-08
SLC30A1	257.669	0.582096	0.229131	2.54045	0.011071	0.0224525
NBEA	1329.84	0.581984	0.126473	4.60163	4.19198e-06	1.49544e-05
TIMM8B	741.101	0.581875	0.129221	4.50295	6.70177e-06	2.31961e-05
BIVM	832.858	0.581783	0.113065	5.14558	2.66702e-07	1.11113e-06
TBCK	960.796	0.581436	0.0971503	5.98491	2.16504e-09	1.15106e-08
EIF3K	6630.56	0.581331	0.0744095	7.81259	5.60242e-15	4.94341e-14
GNA11	2191.68	0.581024	0.0941546	6.17095	6.78809e-10	3.79305e-09
GIT2	2631.54	0.580796	0.0777448	7.47054	7.98661e-14	6.40751e-13
ANO10	628.56	0.580652	0.119657	4.85263	1.21832e-06	4.67146e-06
HPCAL1	420.397	0.580396	0.123898	4.68445	2.80711e-06	1.0271e-05
RBM18	1690.49	0.580389	0.109707	5.29035	1.22084e-07	5.30257e-07
TPCN1	2142	0.579777	0.131926	4.39471	1.10923e-05	3.7291e-05
CERK	6658.25	0.579332	0.0850018	6.81552	9.39213e-12	6.2155e-11
AP1M1	3188.41	0.579072	0.0835761	6.92868	4.24776e-12	2.89211e-11
HIPK2	15914.9	0.579029	0.116698	4.96176	6.98574e-07	2.76775e-06
SORT1	20486.8	0.578987	0.100945	5.73566	9.71331e-09	4.82791e-08
BMPR2	6899.67	0.57845	0.0889648	6.502	7.92575e-11	4.79959e-10
UBAC1	561.01	0.578161	0.1218	4.74679	2.06667e-06	7.67325e-06
MAP3K6	783.839	0.578074	0.102021	5.6662	1.45998e-08	7.1255e-08
THAP7-AS1	238.793	0.577702	0.151048	3.82462	0.000130974	0.000375863
SMG6	1041.03	0.577669	0.0926665	6.23384	4.55125e-10	2.58762e-09
TEAD1	11022.4	0.57764	0.0734767	7.86154	3.79437e-15	3.38559e-14
C15orf61	68.213	0.577372	0.249196	2.31694	0.0205071	0.0389647
NAT1	265.205	0.577271	0.143735	4.01621	5.91428e-05	0.000178753
OSER1-AS1	94.0486	0.577154	0.214885	2.68588	0.00723395	0.0152562
LAMP2	7375.53	0.57671	0.0851897	6.76971	1.29043e-11	8.3892e-11
DGKI	122.95	0.576573	0.232106	2.48409	0.0129882	0.025896
GJA3	433.35	0.576518	0.124731	4.62208	3.79919e-06	1.36625e-05
RASSF8	5257.31	0.576407	0.0947488	6.08353	1.17564e-09	6.41739e-09
ECSIT	1117.88	0.575967	0.0985455	5.84468	5.07535e-09	2.59959e-08
ZNF514	92.2277	0.575356	0.208627	2.75782	0.00581877	0.0125072
IGSF11	3236.08	0.57501	0.0758419	7.58169	3.41088e-14	2.82496e-13
GPATCH2L	1971.98	0.574871	0.105395	5.45444	4.91273e-08	2.24406e-07
TTTY15	438.696	0.574066	0.158357	3.62514	0.000288808	0.000786123
AGPAT4	595.038	0.574041	0.147592	3.88937	0.000100503	0.000294173
ZNF271P	1163.68	0.573507	0.105097	5.45691	4.84488e-08	2.21574e-07
BTD	170.191	0.573491	0.178024	3.22142	0.00127558	0.00310223
MOXD1	7186.24	0.573436	0.103407	5.54545	2.93204e-08	1.38019e-07
PPAPDC2	342.865	0.573122	0.154714	3.70441	0.000211886	0.000590897
FBXO25	1388.45	0.572588	0.0988337	5.79345	6.89541e-09	3.48809e-08
SNX24	412.004	0.572494	0.136249	4.20183	2.64765e-05	8.4251e-05
RNF187	2375.22	0.572386	0.0935788	6.11662	9.55791e-10	5.25911e-09
MICU2	2005.79	0.57234	0.0852572	6.71309	1.90545e-11	1.22713e-10
PER3	2489.01	0.571789	0.0867908	6.58813	4.4541e-11	2.76597e-10
SGCB	1012.54	0.571538	0.112304	5.08921	3.5956e-07	1.47443e-06
SLC25A34	70.92	0.571529	0.234811	2.434	0.0149329	0.0293704
NPLOC4	5588.16	0.571196	0.0908955	6.2841	3.2976e-10	1.89807e-09
SLC25A5	11622.8	0.570991	0.0700363	8.15279	3.55626e-16	3.43031e-15
COL7A1	382.431	0.570876	0.174505	3.2714	0.00107018	0.00263492
RAB3IL1	853.614	0.570514	0.0962274	5.92881	3.0513e-09	1.59863e-08
SERINC5	2607.46	0.570243	0.0882722	6.46005	1.04671e-10	6.29569e-10
DSC2	213.226	0.570177	0.154954	3.67964	0.000233562	0.000647522
YTHDC2	2497.16	0.569891	0.110338	5.16494	2.40519e-07	1.00789e-06
CTBP1-AS2	540.902	0.569881	0.110578	5.15366	2.55449e-07	1.0669e-06
ANK2	2424.93	0.569692	0.086522	6.58437	4.56824e-11	2.8322e-10
MRPS12	769.259	0.569366	0.104395	5.45397	4.92569e-08	2.2493e-07
GPR107	4758.24	0.569015	0.108906	5.22483	1.74314e-07	7.42814e-07
SLC10A3	186.281	0.568719	0.163536	3.47764	0.000505844	0.00131848
WWP1	1463.26	0.568716	0.0899345	6.32368	2.55413e-10	1.4885e-09
CARNMT1	712.143	0.568655	0.121868	4.66613	3.06919e-06	1.11758e-05
CSNK1D	3381.08	0.568506	0.0806868	7.04584	1.84352e-12	1.30392e-11
NLGN4X	823.105	0.568349	0.108306	5.24764	1.54061e-07	6.6098e-07
RMND5B	480.366	0.568317	0.115184	4.93401	8.05575e-07	3.16431e-06
RNF167	1750.87	0.568046	0.0850527	6.67875	2.40981e-11	1.53466e-10
RALGAPB	6366.03	0.568002	0.0873844	6.50004	8.0297e-11	4.86059e-10
NSD1	2722.17	0.566458	0.0883715	6.40996	1.45559e-10	8.64826e-10
ZBTB24	3412.09	0.566243	0.0915373	6.18593	6.17384e-10	3.47164e-09
FRG1BP	363.544	0.565804	0.131649	4.29784	1.72471e-05	5.63896e-05
LOC101927021	184.618	0.56533	0.15852	3.5663	0.000362061	0.00096825
SH3YL1	186.186	0.564827	0.187074	3.01928	0.00253378	0.00584705
DFNA5	495.189	0.564802	0.130727	4.32046	1.55704e-05	5.13521e-05
UBR3	2162.85	0.564567	0.0996621	5.66481	1.47187e-08	7.17654e-08
R3HCC1	778.386	0.564479	0.0993819	5.67989	1.34778e-08	6.60775e-08
TXNDC15	826.693	0.564044	0.136254	4.13965	3.47831e-05	0.000108895
ARHGEF9	399.633	0.56389	0.1291	4.36787	1.25464e-05	4.18351e-05
MYO9A	1109.91	0.563331	0.103119	5.4629	4.68423e-08	2.14552e-07
PLCD1	163.04	0.563228	0.188312	2.99093	0.00278127	0.00636856
WFS1	1136.97	0.563172	0.097933	5.75058	8.89372e-09	4.43952e-08
APH1B	181.017	0.562932	0.180499	3.11875	0.0018162	0.00430819
KIAA1841	624.025	0.5629	0.102792	5.47608	4.34854e-08	2.00452e-07
MYO1C	3578.46	0.562677	0.0840723	6.69277	2.18978e-11	1.40426e-10
SECISBP2	792.884	0.562664	0.103754	5.42305	5.85905e-08	2.6499e-07
BBS9	539.692	0.562629	0.112195	5.01476	5.3101e-07	2.1335e-06
TMEM263	2708.4	0.562606	0.0975111	5.76965	7.94343e-09	3.99019e-08
MPRIP	3110.62	0.562504	0.0868454	6.47707	9.35238e-11	5.63641e-10
FAM149A	67.7158	0.562238	0.250438	2.24502	0.0247671	0.0461482
[truncated: 3,690 more rows]
