# Supplementary material for: A Network of MicroRNAs and mRNAs Involved in Melanosome Maturation and Trafficking Defines the Lower Response of Pigmentable Melanoma Cells to Targeted Therapy
Source: Cancers (Basel). 2023 Jan 31;15(3):894. doi: 10.3390/cancers15030894 (PMC9913661; doi:10.3390/cancers15030894)
Supplement: Supplementary file 1 [file cancers-15-00894-s001.zip › Supplementary Table S3-List of 4354 DE RNAs in SK-Mel-5 cells upon 48h of treatment with 2uM vem.xlsx]

## Sheet: DE RNAs in SK-Mel-5 
gene	baseMean	log2FoldChange	lfcSE	stat	pvalue	padj
KCNJ13	160.206	4.09385	0.230953	17.7259	2.64584e-70	2.76585e-68
CXCL12	49.3919	3.70494	0.322146	11.5008	1.30693e-30	3.70709e-29
SLC5A10	33.5348	3.60496	0.358733	10.0491	9.26836e-24	1.82918e-22
PDZD2	220.844	3.48278	0.190751	18.2583	1.77866e-74	2.05854e-72
C17orf77	2186.36	3.38425	0.21619	15.6541	3.11612e-55	2.25404e-53
HKDC1	39.5368	3.33986	0.335736	9.94788	2.57608e-23	4.95726e-22
ADAMTS14	184.636	3.30554	0.198245	16.674	2.02585e-62	1.78396e-60
LOC100505912	153.76	3.17368	0.21491	14.7675	2.3739e-49	1.45149e-47
CDK15	35.5733	2.96511	0.327756	9.04668	1.47384e-19	2.22559e-18
TYRP1	79848.8	2.94857	0.214962	13.7167	8.06804e-43	3.93754e-41
TNS1	1021.76	2.92638	0.120352	24.3151	1.3559e-130	4.88215e-128
ELSPBP1	71.7247	2.88193	0.390066	7.3883	1.48715e-13	1.41245e-12
RAB3B	150.827	2.87332	0.192887	14.8964	3.47961e-50	2.21099e-48
SNCB	121.38	2.84921	0.204366	13.9417	3.53442e-44	1.82965e-42
ASPA	105.676	2.78621	0.221416	12.5836	2.59867e-36	9.41974e-35
PIK3IP1	73.5211	2.76883	0.251692	11.0009	3.7833e-28	9.56331e-27
ADHFE1	92.2173	2.72638	0.228251	11.9447	6.92117e-33	2.15247e-31
SV2B	94.6015	2.66999	0.233937	11.4133	3.58748e-30	9.97048e-29
BTK	136.3	2.64319	0.21031	12.5681	3.16385e-36	1.14173e-34
IGF1	121.033	2.63123	0.337162	7.80403	5.99588e-15	6.39995e-14
PRELP	515.482	2.56147	0.129762	19.7397	9.82893e-87	1.46108e-84
PRDM7	554.254	2.51924	0.131594	19.144	1.08547e-81	1.50324e-79
EPS8L2	73.186	2.49745	0.24869	10.0424	9.92223e-24	1.95241e-22
POU2F2	43.344	2.49682	0.297369	8.39637	4.60479e-17	5.80182e-16
TSPAN10	1913.25	2.48135	0.205849	12.0542	1.8427e-33	5.85436e-32
KIF1A	44.2136	2.48048	0.306945	8.08119	6.41392e-16	7.4605e-15
ZDHHC22	70.0582	2.47824	0.372585	6.65149	2.90132e-11	2.2206e-10
HPGD	1721.67	2.47414	0.089911	27.5177	1.07863e-166	6.02654e-164
CEND1	453.388	2.45378	0.116919	20.987	8.62488e-98	1.76476e-95
PKD1L1	142.863	2.42182	0.183356	13.2083	7.86286e-40	3.35268e-38
LRRC39	147.188	2.41859	0.180501	13.3993	6.10273e-41	2.73156e-39
TSPAN15	186.723	2.39942	0.177127	13.5463	8.32876e-42	3.92299e-40
CELF2	3651.79	2.39431	0.0891316	26.8627	6.00179e-159	2.77848e-156
TMPRSS13	55.5516	2.30941	0.258779	8.92425	4.48738e-19	6.59193e-18
TPPP3	52.8623	2.24472	0.285779	7.85476	4.00529e-15	4.3468e-14
PRUNE2	12801	2.23208	0.0610195	36.5797	6.00828e-293	2.4338e-289
BCAN	7470.29	2.19122	0.0908589	24.1167	1.66981e-128	5.41118e-126
REPS2	148.107	2.1893	0.178602	12.258	1.52275e-34	5.19436e-33
B3GALT2	88.9356	2.15661	0.215614	10.0022	1.49064e-23	2.89601e-22
ELFN2	81.6275	2.12921	0.232894	9.14238	6.10905e-20	9.50864e-19
C7orf69	104.591	2.12846	0.212509	10.0159	1.29811e-23	2.52804e-22
CPM	3014.46	2.09225	0.0715388	29.2463	5.00077e-188	4.50153e-185
SERPINF1	1930.77	2.08581	0.103439	20.1647	2.00073e-90	3.34204e-88
SLC7A4	76.7246	2.08573	0.236048	8.83605	9.91664e-19	1.41164e-17
KCNIP3	919.884	2.07577	0.104853	19.7969	3.16451e-87	4.74764e-85
HIST1H2AC	266.473	2.06709	0.158089	13.0754	4.55047e-39	1.89055e-37
CD226	37.3649	2.05308	0.306742	6.69317	2.18383e-11	1.69143e-10
TP53INP2	5269.05	2.04683	0.0770077	26.5795	1.17044e-155	5.26795e-153
GIPR	94.9579	2.02876	0.20594	9.85125	6.76996e-23	1.27255e-21
IL17D	271.698	1.99171	0.14034	14.192	1.02644e-45	5.63779e-44
CARD14	949.746	1.98329	0.0926746	21.4005	1.32071e-101	2.93142e-99
AMBN	54.5495	1.98186	0.2676	7.40605	1.30119e-13	1.24092e-12
ST6GALNAC2	5786.07	1.96938	0.0811331	24.2735	3.73669e-130	1.28821e-127
FAM69C	470.957	1.96096	0.121633	16.1219	1.79157e-58	1.40917e-56
CDH7	198.873	1.94618	0.155777	12.4933	8.11814e-36	2.89732e-34
STON1	167.089	1.94499	0.160176	12.1429	6.25962e-34	2.06148e-32
MCF2L	1336.48	1.94039	0.0851128	22.7979	4.81096e-115	1.2779e-112
EGLN3	81.1882	1.93526	0.216911	8.92194	4.5817e-19	6.72439e-18
CCDC154	72.1614	1.92346	0.226602	8.48826	2.09748e-17	2.71233e-16
C15orf59	51.8448	1.92263	0.256281	7.50206	6.2823e-14	6.13206e-13
SULF1	164.495	1.91771	0.165457	11.5904	4.61084e-31	1.33172e-29
LRAT	1282.73	1.91282	0.0817399	23.4013	4.14525e-121	1.2438e-118
CCDC146	59.371	1.90771	0.242663	7.86157	3.79345e-15	4.12796e-14
HIST1H4H	53.2455	1.90755	0.283572	6.72687	1.73356e-11	1.36149e-10
EXPH5	67.8305	1.90621	0.240661	7.92073	2.36121e-15	2.61508e-14
LINC01594	60.3589	1.89355	0.246904	7.66917	1.73106e-14	1.77634e-13
SLC7A5	26783.7	1.89335	0.0731176	25.8946	7.65643e-148	3.26466e-145
SEMA6A	11817.8	1.89088	0.154753	12.2187	2.47073e-34	8.34025e-33
TXLNB	78.6768	1.88855	0.218569	8.64052	5.59575e-18	7.53682e-17
TMPRSS5	75.2434	1.88036	0.227818	8.25377	1.53475e-16	1.8768e-15
EFHD1	124.976	1.86961	0.186339	10.0334	1.08702e-23	2.1349e-22
CACNA1D	77.6964	1.85708	0.217829	8.52541	1.5227e-17	1.99291e-16
CTNND2	253.597	1.84851	0.137576	13.4362	3.70947e-41	1.6836e-39
SERPINI1	135.126	1.8469	0.201187	9.17998	4.31155e-20	6.78254e-19
TFEB	199.311	1.8428	0.158831	11.6023	4.01188e-31	1.16705e-29
FAHD2CP	131.9	1.83677	0.181884	10.0986	5.60641e-24	1.12288e-22
PHF24	108.822	1.83517	0.190195	9.6489	4.96881e-22	8.87647e-21
MYH7B	61.9763	1.83332	0.256928	7.13555	9.64041e-13	8.49394e-12
FRY	108.632	1.82916	0.205537	8.89943	5.61343e-19	8.16976e-18
TFAP2A-AS1	202.697	1.82475	0.149611	12.1966	3.23934e-34	1.08444e-32
LOC100506444	32.1732	1.82273	0.301813	6.03925	1.54837e-09	9.9517e-09
ESRP1	1143.72	1.82168	0.0874057	20.8417	1.81269e-96	3.53868e-94
KCNIP2	257.096	1.82119	0.140625	12.9507	2.32802e-38	9.33684e-37
KIT	38.6625	1.81994	0.287093	6.3392	2.30964e-10	1.61445e-09
NRBP2	1984.03	1.81762	0.0676076	26.8849	3.30084e-159	1.57304e-156
TRPM1	8421.43	1.80594	0.0806245	22.3994	3.98656e-111	1.02531e-108
NREP	729.986	1.80347	0.0970083	18.5909	3.8066e-77	4.74449e-75
ABCA10	61.7226	1.80335	0.251744	7.16343	7.86809e-13	7.01633e-12
STK32A	2052.45	1.7976	0.0862887	20.8324	2.20152e-96	4.24657e-94
KLHL41	187.057	1.79663	0.154756	11.6095	3.688e-31	1.0767e-29
ALS2CR12	137.677	1.79622	0.188281	9.54008	1.42727e-21	2.46022e-20
TMEM51-AS1	59.497	1.7959	0.25036	7.17326	7.32325e-13	6.54127e-12
CAPS2	134.952	1.7937	0.196671	9.12029	7.49223e-20	1.15616e-18
OSBPL7	41.5685	1.77901	0.285793	6.22483	4.82082e-10	3.26827e-09
OR2C3	321.188	1.7772	0.146637	12.1197	8.30173e-34	2.70106e-32
CERS4	445.831	1.76046	0.1203	14.6339	1.7068e-48	1.01674e-46
MAF	723.692	1.75823	0.106314	16.538	1.95331e-61	1.66576e-59
GCSAML-AS1	36.6817	1.73157	0.298992	5.79136	6.98176e-09	4.20072e-08
CTSF	1914.36	1.72761	0.0857374	20.15	2.68862e-90	4.40038e-88
LINC00482	149.401	1.72677	0.171047	10.0953	5.79558e-24	1.15933e-22
GDNF-AS1	110.241	1.7235	0.202626	8.50581	1.80325e-17	2.33744e-16
STARD4-AS1	59.5511	1.70836	0.246786	6.92245	4.4391e-12	3.67723e-11
APOE	3698.69	1.70741	0.221323	7.71455	1.21413e-14	1.26349e-13
RASD2	54.9406	1.70236	0.268047	6.35098	2.13941e-10	1.5039e-09
NAALAD2	230.748	1.69731	0.152158	11.1549	6.77812e-29	1.75721e-27
NECAB2	60.5141	1.69466	0.263134	6.44029	1.19245e-10	8.57577e-10
IGFBP7	491.079	1.69349	0.12115	13.9784	2.11081e-44	1.10327e-42
BHLHE41	1933.41	1.69115	0.0922609	18.3301	4.76141e-75	5.63133e-73
FMO5	38.4453	1.66059	0.284362	5.83972	5.22896e-09	3.19837e-08
LOC100506688	561.858	1.65981	0.0989439	16.7753	3.70046e-63	3.31263e-61
CNTNAP1	1011.12	1.65819	0.083261	19.9156	2.98342e-88	4.60555e-86
WSCD1	90.6389	1.65351	0.202403	8.1694	3.09931e-16	3.71435e-15
LOC100507577	468.754	1.6494	0.116299	14.1823	1.17859e-45	6.45158e-44
FXYD6	71.5385	1.64711	0.222392	7.40633	1.29842e-13	1.239e-12
WDFY3-AS2	52.4442	1.64586	0.25498	6.45485	1.08325e-10	7.8287e-10
ATP7A	3460.94	1.64361	0.0823811	19.9513	1.45982e-88	2.34193e-86
SCN5A	88.6218	1.64117	0.2049	8.00962	1.15068e-15	1.30472e-14
NPY6R	358.454	1.63897	0.122335	13.3974	6.26389e-41	2.79597e-39
PADI2	154.194	1.63871	0.177687	9.22247	2.90321e-20	4.60282e-19
LDHD	101.276	1.63024	0.192946	8.44921	2.93291e-17	3.75371e-16
LINC01320	50.8107	1.62828	0.257607	6.32078	2.60239e-10	1.81128e-09
FAM71F2	60.5397	1.62207	0.236291	6.8647	6.66328e-12	5.44179e-11
SLC23A3	44.7837	1.6187	0.272335	5.94377	2.7854e-09	1.74726e-08
HTR3B	35.4258	1.6178	0.299105	5.40879	6.34525e-08	3.42023e-07
PLP1	33923.8	1.60887	0.0734605	21.9012	2.53007e-106	6.21132e-104
SEC31B	166.411	1.60836	0.165524	9.71678	2.55747e-22	4.6456e-21
MXD4	587.98	1.60704	0.110561	14.5353	7.23664e-48	4.21782e-46
ACTA2	112.224	1.59821	0.19259	8.29855	1.05389e-16	1.30352e-15
MLIP	299.72	1.59613	0.127038	12.5642	3.32215e-36	1.19619e-34
KIAA1456	759.369	1.59326	0.104565	15.237	2.00912e-52	1.32873e-50
LOC100507477	122.873	1.58521	0.181311	8.74303	2.26943e-18	3.15364e-17
SEMA3C	2774.5	1.58483	0.0956115	16.5757	1.04458e-61	8.95519e-60
RAP2C-AS1	64.3281	1.57801	0.241699	6.52882	6.62901e-11	4.88893e-10
MLPH	3479.49	1.56837	0.0968139	16.1998	5.05848e-59	4.05755e-57
MST1	62.7227	1.56619	0.232477	6.73695	1.6175e-11	1.27472e-10
KRBA2	307.532	1.56594	0.137112	11.4209	3.28861e-30	9.15555e-29
CNTN6	48.0721	1.55815	0.259084	6.0141	1.80892e-09	1.15121e-08
ABCB5	1889.42	1.55701	0.0982195	15.8524	1.35331e-56	1.00586e-54
CDH12	327.215	1.55406	0.137571	11.2964	1.36645e-29	3.7211e-28
SLC25A16	1024.57	1.55346	0.113756	13.6561	1.85606e-42	8.92397e-41
C1orf54	42.4818	1.55222	0.268014	5.79155	6.97404e-09	4.19832e-08
ITGBL1	304.924	1.55033	0.14128	10.9735	5.12667e-28	1.28587e-26
DCT	133430	1.54842	0.158608	9.76258	1.62951e-22	2.98676e-21
AK9	121.231	1.54631	0.183172	8.4418	3.12493e-17	3.99001e-16
TMEM86A	230.853	1.54054	0.150446	10.2399	1.31419e-24	2.70225e-23
GDPD5	5881.64	1.54044	0.0836708	18.4107	1.07796e-75	1.28428e-73
LINC00173	38.0513	1.53827	0.277657	5.54019	3.02146e-08	1.6841e-07
FAM228B	55.1127	1.53775	0.24291	6.33054	2.44297e-10	1.70471e-09
RHOBTB1	2270.75	1.53113	0.0886354	17.2744	7.32803e-67	7.10995e-65
ALDH1L2	278.812	1.523	0.135367	11.2509	2.29209e-29	6.1795e-28
SFTPC	35.157	1.52206	0.284815	5.34404	9.08952e-08	4.802e-07
PRKXP1	90.6765	1.51314	0.211915	7.14033	9.31062e-13	8.23471e-12
ID2	1801.52	1.51047	0.0816127	18.5078	1.78574e-76	2.15928e-74
CCDC171	909.623	1.50845	0.0909983	16.5767	1.02694e-61	8.8508e-60
OLFML2B	44.4608	1.5036	0.26792	5.61212	1.99867e-08	1.1403e-07
DENND2D	78.5464	1.50358	0.240419	6.25399	4.00106e-10	2.7308e-09
SULF2	180.954	1.50223	0.157645	9.52919	1.58509e-21	2.71779e-20
ST6GALNAC1	151.364	1.5019	0.16685	9.00147	2.22721e-19	3.34764e-18
CFAP61	1713.77	1.50159	0.103097	14.5648	4.70017e-48	2.76934e-46
C1orf198	1800.29	1.50044	0.0688877	21.7809	3.52165e-105	8.26975e-103
MAPT	895.747	1.50001	0.0882792	16.9916	9.4769e-65	8.62664e-63
KIAA1407	97.3363	1.49549	0.222896	6.70935	1.95488e-11	1.5243e-10
TMCC3	705.575	1.48601	0.113985	13.0369	7.54585e-39	3.11901e-37
ABAT	167.833	1.47914	0.155328	9.52272	1.68699e-21	2.88033e-20
EPS15	7052.75	1.4759	0.0715072	20.6399	1.20284e-94	2.21473e-92
TECPR2	2782.35	1.47176	0.0710041	20.7279	1.94127e-95	3.65749e-93
TP53INP1	758.723	1.46987	0.101344	14.5039	1.14505e-47	6.64991e-46
SCART1	81.2877	1.46901	0.211843	6.93446	4.07772e-12	3.39175e-11
CD82	367.287	1.46736	0.148285	9.89559	4.35045e-23	8.25414e-22
VEPH1	2000.43	1.46564	0.108387	13.5223	1.15477e-41	5.39212e-40
AAMDC	70.4056	1.45506	0.225871	6.44201	1.17904e-10	8.48689e-10
CDH1	3111.15	1.45445	0.083845	17.3468	2.08385e-67	2.05882e-65
GPR85	196.499	1.45431	0.146849	9.90342	4.02296e-23	7.6507e-22
PTP4A3	204.832	1.45227	0.14239	10.1992	1.99874e-24	4.07367e-23
ZNF713	97.1826	1.4514	0.199057	7.29138	3.0679e-13	2.83566e-12
LINC00969	53.3264	1.45137	0.251329	5.7748	7.70444e-09	4.61497e-08
CNPPD1	1302.76	1.44563	0.0830452	17.4078	7.19797e-68	7.15514e-66
MTSS1	389.422	1.43773	0.136368	10.543	5.47117e-26	1.24508e-24
MEAT6	51.3652	1.43772	0.256137	5.61308	1.9876e-08	1.13478e-07
CPED1	427.349	1.43622	0.127763	11.2413	2.5561e-29	6.8457e-28
HIST1H2BD	450.859	1.43486	0.121654	11.7945	4.16537e-32	1.25449e-30
MTURN	11343.2	1.43458	0.0771771	18.5882	4.00724e-77	4.95644e-75
JAKMIP2	37.6558	1.43181	0.283638	5.04803	4.46398e-07	2.15011e-06
HECTD2-AS1	57.3656	1.42594	0.239439	5.95536	2.59502e-09	1.63417e-08
FAM124A	783.193	1.42017	0.0968567	14.6626	1.11919e-48	6.69159e-47
HIST1H2BC	107.676	1.41506	0.188803	7.49488	6.63586e-14	6.46936e-13
RORB	58.1186	1.41356	0.249005	5.67683	1.37213e-08	7.97724e-08
RNF144B	793.331	1.40858	0.101427	13.8876	7.53286e-44	3.8871e-42
LOC100132057	43.2173	1.4078	0.264239	5.32776	9.94291e-08	5.21713e-07
FSTL1	6385.48	1.3987	0.0867889	16.1161	1.96491e-58	1.53804e-56
TAPT1-AS1	131.473	1.39845	0.171065	8.17497	2.95948e-16	3.54941e-15
CA14	1278.02	1.39572	0.101063	13.8104	2.20598e-43	1.1135e-41
RHCG	137.566	1.39479	0.168299	8.28759	1.15565e-16	1.42396e-15
CALCOCO1	1406.88	1.3919	0.0883598	15.7527	6.586e-56	4.82864e-54
HLA-F-AS1	590.085	1.39181	0.0983337	14.154	1.76495e-45	9.53247e-44
AMER2	34.6	1.38931	0.299628	4.63679	3.53857e-06	1.5029e-05
LOC100131564	205.214	1.38621	0.159444	8.69402	3.49841e-18	4.76342e-17
C21orf91	5120.92	1.38527	0.0873621	15.8567	1.2637e-56	9.43581e-55
LINC01531	2515.35	1.37516	0.0714223	19.2539	1.30986e-82	1.86173e-80
CTSO	118.825	1.37236	0.199222	6.88862	5.63344e-12	4.62873e-11
ST3GAL4-AS1	47.0491	1.36941	0.273752	5.00237	5.66286e-07	2.69077e-06
PKNOX2	528.306	1.36602	0.110466	12.366	3.99396e-35	1.38871e-33
FAM122C	139.344	1.36471	0.178971	7.62531	2.43443e-14	2.4607e-13
GALNT3	4741.45	1.36377	0.0881537	15.4704	5.49825e-54	3.82352e-52
KATNAL2	310.42	1.36183	0.118825	11.4608	2.07519e-30	5.83754e-29
GPR146	53.0447	1.36152	0.2544	5.35188	8.70452e-08	4.61365e-07
SYK	163.198	1.35715	0.158928	8.53944	1.3487e-17	1.76947e-16
ROBO2	1741	1.3569	0.0944286	14.3696	8.02555e-47	4.53094e-45
CPQ	653.42	1.35467	0.112747	12.0151	2.95846e-33	9.30793e-32
IQCH-AS1	35.6155	1.35428	0.284532	4.75966	1.93916e-06	8.56603e-06
GAGE1	927.026	1.35312	0.0938716	14.4146	4.18952e-47	2.41576e-45
NEK11	53.8868	1.3482	0.253238	5.32384	1.01602e-07	5.3277e-07
NAP1L5	303.413	1.34511	0.127706	10.5329	6.09386e-26	1.37903e-24
PAQR8	2129.82	1.34278	0.0703341	19.0914	2.97503e-81	4.05078e-79
HSD17B7P2	71.831	1.3393	0.241273	5.55098	2.8407e-08	1.58991e-07
ZNF44	159.375	1.33859	0.171591	7.80105	6.13947e-15	6.5489e-14
GCSAML	992.217	1.33614	0.122215	10.9327	8.04481e-28	1.99008e-26
SLCO4C1	51.3745	1.33572	0.253479	5.26957	1.36747e-07	7.05418e-07
ATP1A3	852.476	1.33537	0.099341	13.4423	3.41603e-41	1.55477e-39
LOC100128288	80.3703	1.33492	0.21491	6.21155	5.24641e-10	3.5405e-09
BBC3	325.751	1.33478	0.127647	10.4568	1.36318e-25	3.00103e-24
ZNF862	440.364	1.33243	0.103981	12.8142	1.36566e-37	5.31919e-36
SPP1	21901.6	1.33153	0.0805731	16.5257	2.39541e-61	2.03209e-59
SLC6A15	5064.07	1.32983	0.0823316	16.1521	1.09795e-58	8.67812e-57
CLEC2D	146.107	1.32773	0.174745	7.59808	3.00549e-14	3.00976e-13
HSF4	778.414	1.32682	0.0963882	13.7654	4.11482e-43	2.04517e-41
TRIM63	3208.71	1.32624	0.0969598	13.6782	1.37006e-42	6.64641e-41
CARF	209.085	1.326	0.144892	9.15167	5.60584e-20	8.77598e-19
CCDC92	599.487	1.32258	0.0996841	13.2677	3.56359e-40	1.53566e-38
LINC00342	174.158	1.32241	0.165378	7.99631	1.28203e-15	1.44556e-14
PRADC1	578.187	1.32073	0.107994	12.2296	2.16019e-34	7.3225e-33
AHRR	2265.78	1.32058	0.0689993	19.139	1.19565e-81	1.6418e-79
LOC100507487	36.6385	1.32027	0.277873	4.75136	2.02049e-06	8.89619e-06
DNAI1	34.8981	1.32004	0.288009	4.58333	4.5763e-06	1.90617e-05
KU-MEL-3	93.6763	1.31997	0.19274	6.84846	7.46473e-12	6.05967e-11
KCNQ3	100.66	1.31963	0.196653	6.71044	1.94033e-11	1.51441e-10
SAMD9L	1112.18	1.31846	0.108686	12.1309	7.24519e-34	2.37159e-32
KLHL24	3391.18	1.31686	0.078779	16.7159	1.00363e-62	8.93511e-61
PER3	2263.49	1.31645	0.0783604	16.7999	2.44365e-63	2.19969e-61
USP51	643.169	1.31171	0.114647	11.4413	2.60085e-30	7.27835e-29
C2orf88	363.135	1.30944	0.127613	10.2611	1.05529e-24	2.18097e-23
ALDH6A1	312.634	1.3077	0.126083	10.3717	3.33388e-25	7.17381e-24
HNMT	149.958	1.30659	0.165903	7.87563	3.39039e-15	3.71179e-14
FAM151B	102.906	1.30532	0.190646	6.8468	7.55189e-12	6.11816e-11
ZNF440	1034.13	1.30322	0.0960633	13.5663	6.34375e-42	3.0074e-40
CACNA2D2	78.5365	1.2993	0.22279	5.83197	5.47759e-09	3.3454e-08
C1orf95	61.6063	1.29492	0.232726	5.56417	2.63409e-08	1.48143e-07
OCA2	9884.75	1.29322	0.0746906	17.3144	3.66436e-67	3.5984e-65
PPARGC1A	15875.8	1.28892	0.069411	18.5694	5.67879e-77	6.97071e-75
CPLX1	136.355	1.28719	0.178637	7.20563	5.77751e-13	5.21231e-12
HIST2H2BE	661.952	1.28693	0.21077	6.10584	1.0226e-09	6.68649e-09
LOC100506746	44.5605	1.28657	0.263748	4.87803	1.0715e-06	4.89746e-06
ADAMTS17	303.392	1.28351	0.122	10.5205	6.94853e-26	1.56371e-24
MYO15B	56.7801	1.27614	0.252116	5.06174	4.15452e-07	2.00822e-06
UGT2B7	39.1885	1.27577	0.271767	4.69433	2.67478e-06	1.15603e-05
CRYL1	1198.93	1.27084	0.0860113	14.7753	2.11347e-49	1.30704e-47
EVL	1016.29	1.26926	0.0854772	14.8491	7.04674e-50	4.44274e-48
EPAS1	459.431	1.26815	0.121544	10.4336	1.74115e-25	3.81242e-24
TMEM51	1104.63	1.26656	0.0900136	14.0707	5.74775e-45	3.0838e-43
DUSP15	143.746	1.26207	0.178867	7.0559	1.71489e-12	1.4733e-11
CFAP44	477.791	1.26131	0.129819	9.71598	2.57763e-22	4.67698e-21
BMPR2	4244.91	1.25994	0.0889038	14.1719	1.36668e-45	7.40613e-44
DNAH1	123.203	1.24814	0.176839	7.05803	1.68878e-12	1.45318e-11
HAS2	4688.95	1.24771	0.0815356	15.3026	7.34067e-53	4.95587e-51
CITED1	484.697	1.24739	0.101494	12.2903	1.02094e-34	3.50473e-33
DPY19L2	221.539	1.24366	0.136236	9.12867	6.93453e-20	1.07419e-18
GAB1	1261.96	1.24279	0.0966015	12.8651	7.07131e-38	2.78098e-36
CST1	1297.94	1.24086	0.236676	5.24288	1.58092e-07	8.07301e-07
TRPC3	82.9946	1.23965	0.204845	6.05165	1.43371e-09	9.24407e-09
UGDH-AS1	32.1768	1.23835	0.294068	4.21109	2.54143e-05	9.47074e-05
TP53TG1	79.8466	1.23795	0.209825	5.89991	3.63694e-09	2.2561e-08
TMEM80	153.022	1.23749	0.157174	7.87334	3.45305e-15	3.77784e-14
LOC100130370	1763.05	1.23548	0.0756992	16.321	7.00102e-60	5.72917e-58
FAM63A	1341.41	1.23106	0.0910042	13.5275	1.07558e-41	5.03687e-40
FAM53B	5786.92	1.22831	0.0615859	19.9446	1.66905e-88	2.65133e-86
NPPA-AS1	59.8172	1.22726	0.235213	5.21765	1.81207e-07	9.18681e-07
HAGHL	214.442	1.22528	0.145444	8.4244	3.6259e-17	4.60427e-16
ADAMTS13	108.26	1.22436	0.184553	6.63421	3.26253e-11	2.48415e-10
LINC00987	59.9901	1.22404	0.23343	5.24374	1.57355e-07	8.03791e-07
FHIT	64.727	1.22386	0.231723	5.28155	1.28093e-07	6.62883e-07
ADGRA2	1966.37	1.22353	0.0702566	17.4152	6.32354e-68	6.32471e-66
PIGZ	71.795	1.22344	0.218091	5.60977	2.02598e-08	1.15425e-07
LINC01176	44.5464	1.21691	0.26522	4.58832	4.46838e-06	1.86505e-05
TNS3	5260.41	1.21675	0.0590978	20.5888	3.46025e-94	6.2996e-92
C8orf46	283.337	1.21631	0.128014	9.5014	2.07078e-21	3.52076e-20
EPM2A	376.268	1.21527	0.112684	10.7847	4.06429e-27	9.79966e-26
VEGFB	2073.12	1.21296	0.08065	15.0398	4.02755e-51	2.59993e-49
PMEL	134536	1.21149	0.0820186	14.7709	2.2555e-49	1.38431e-47
RFTN2	119.627	1.21141	0.178874	6.77239	1.26675e-11	1.00811e-10
SULT1C2	313.616	1.21007	0.120649	10.0296	1.12928e-23	2.20721e-22
CDC42EP4	949.062	1.20931	0.0874583	13.8273	1.7456e-43	8.92238e-42
LSS	3896.38	1.20644	0.0815333	14.7969	1.53347e-49	9.51984e-48
TEX41	718.119	1.20215	0.102171	11.766	5.84119e-32	1.75268e-30
IL1R1	51.8616	1.20208	0.260466	4.6151	3.929e-06	1.65656e-05
TGFB2	140.087	1.19941	0.181953	6.5919	4.34241e-11	3.25741e-10
MAFB	168.702	1.19848	0.160446	7.46966	8.04027e-14	7.76842e-13
QRICH2	234.827	1.19837	0.131701	9.09921	9.0994e-20	1.39487e-18
SLC16A7	3587.25	1.19818	0.0972206	12.3243	6.70119e-35	2.31513e-33
LOC100288152	363.974	1.19801	0.126228	9.49089	2.29072e-21	3.87033e-20
GAS6	629.241	1.19714	0.101034	11.8489	2.18041e-32	6.65333e-31
COL16A1	532.313	1.19661	0.104504	11.4504	2.34117e-30	6.56298e-29
ZMAT1	51.6412	1.19586	0.259221	4.61328	3.96371e-06	1.66902e-05
LOC100288798	71.618	1.1946	0.228226	5.23426	1.65646e-07	8.43748e-07
DPF3	37.4178	1.19422	0.284292	4.20069	2.66102e-05	9.88911e-05
TTC39A	60.6368	1.19383	0.241331	4.94684	7.54283e-07	3.52209e-06
HSPA12A	3094.33	1.19344	0.0731976	16.3043	9.19371e-60	7.48571e-58
SMAD6	150.415	1.192	0.171281	6.95932	3.41913e-12	2.86158e-11
NAV1	2554.58	1.1912	0.192412	6.19089	5.98273e-10	4.00902e-09
ACRC	44.0731	1.19026	0.270856	4.39444	1.11058e-05	4.39646e-05
C14orf132	247.372	1.18821	0.134377	8.84238	9.37023e-19	1.33649e-17
RAB27A	5597.88	1.18819	0.0889372	13.3599	1.03765e-40	4.61898e-39
RGR	65.5958	1.18783	0.244881	4.85065	1.23055e-06	5.57099e-06
PLXDC1	49.2475	1.18706	0.256556	4.6269	3.71178e-06	1.57234e-05
LOC340357	196.411	1.184	0.153116	7.73268	1.0531e-14	1.10228e-13
ETS1	15359.4	1.18163	0.0581101	20.3343	6.39374e-92	1.11979e-89
FRG2DP	2549.75	1.1805	0.0886349	13.3187	1.80187e-40	7.91212e-39
CLYBL	226.886	1.17688	0.139724	8.42293	3.67172e-17	4.6588e-16
BDH1	294.884	1.17642	0.129219	9.10404	8.70313e-20	1.33539e-18
GMPR	2986.76	1.17219	0.066297	17.6809	5.88148e-70	6.10882e-68
ALDH2	415.422	1.17111	0.116547	10.0484	9.336e-24	1.84028e-22
SOX4	2962.87	1.16696	0.0790386	14.7644	2.48432e-49	1.51328e-47
FAHD2B	201.823	1.16519	0.144506	8.06324	7.42985e-16	8.61745e-15
RNLS	1278.04	1.1571	0.0780315	14.8286	9.57077e-50	5.98746e-48
ZNF471	145.146	1.155	0.170093	6.7904	1.11822e-11	8.95625e-11
MICAL1	2150.75	1.15467	0.0821014	14.064	6.32148e-45	3.38043e-43
PIK3R3	2564.08	1.15208	0.0886811	12.9912	1.37176e-38	5.52902e-37
GPRIN3	183.48	1.1516	0.148217	7.76969	7.86802e-15	8.30525e-14
MROH1	808.259	1.15106	0.093956	12.251	1.65917e-34	5.6478e-33
ITK	240.072	1.14903	0.143663	7.99811	1.26339e-15	1.42554e-14
ZBTB20	469.818	1.14896	0.131791	8.71804	2.83057e-18	3.89666e-17
OPTN	2045.66	1.14825	0.0828051	13.8669	1.00565e-43	5.1565e-42
MIR22HG	304.384	1.14617	0.124858	9.17977	4.32004e-20	6.78929e-19
KLC4	304.672	1.14483	0.122117	9.37485	6.92732e-21	1.13149e-19
MUC15	240.52	1.14442	0.138473	8.26456	1.40216e-16	1.72115e-15
PLS3-AS1	54.072	1.14226	0.240025	4.75892	1.94633e-06	8.59535e-06
ZNF606	35.8821	1.14101	0.284148	4.01553	5.93121e-05	0.000208286
LRRC16B	78.1913	1.13998	0.211707	5.3847	7.25643e-08	3.88424e-07
PPP1R3E	306.581	1.13969	0.122008	9.34116	9.52844e-21	1.54235e-19
RBPMS-AS1	52.7288	1.1388	0.246208	4.62537	3.73933e-06	1.58318e-05
USP35	541.87	1.13849	0.104136	10.9328	8.03521e-28	1.99008e-26
AMOTL2	558.73	1.13747	0.100802	11.2842	1.57091e-29	4.26355e-28
ZNF536	411.094	1.1374	0.108061	10.5255	6.58917e-26	1.48904e-24
LMNTD2	86.2784	1.13535	0.204317	5.55679	2.74787e-08	1.54061e-07
OC90	35.4436	1.13469	0.283403	4.00379	6.23351e-05	0.000218099
COL4A5	292.542	1.13417	0.124091	9.13979	6.2574e-20	9.72087e-19
CLCN7	10472.9	1.13301	0.0691325	16.389	2.29062e-60	1.89362e-58
FAM222A	1075.37	1.13157	0.100656	11.242	2.5349e-29	6.80016e-28
TFAP2A	8298.65	1.13124	0.0631788	17.9054	1.07025e-71	1.15608e-69
CCL28	1264.44	1.12811	0.0887197	12.7154	4.85476e-37	1.81667e-35
HIPK2	13792.3	1.12795	0.0855776	13.1805	1.13684e-39	4.80944e-38
PLXNC1	12043.9	1.12574	0.0879891	12.7941	1.76962e-37	6.84322e-36
LRRC37A3	45.6937	1.12568	0.264232	4.26021	2.04236e-05	7.73005e-05
SGCD	1957.01	1.1255	0.086359	13.0328	7.96207e-39	3.27435e-37
TCP11L2	95.6639	1.12545	0.196823	5.71806	1.07749e-08	6.34858e-08
ADCY10P1	40.8423	1.12516	0.26822	4.19493	2.72959e-05	0.000101184
LOC100133985	66.9537	1.12431	0.23811	4.72181	2.33753e-06	1.01979e-05
HLF	67.2436	1.12384	0.225301	4.98817	6.09534e-07	2.88527e-06
SIAE	1951.63	1.12293	0.0986495	11.383	5.081e-30	1.40013e-28
TTLL3	58.4449	1.12265	0.233182	4.81445	1.47603e-06	6.62863e-06
PRICKLE1	141.51	1.12144	0.172377	6.50574	7.73098e-11	5.66554e-10
KCNAB2	8875.07	1.12125	0.0604407	18.5513	7.95673e-77	9.69345e-75
DCLK2	131.313	1.12061	0.171595	6.53055	6.55298e-11	4.84168e-10
BEST1	2044.28	1.11906	0.0778192	14.3802	6.88819e-47	3.90243e-45
DLL3	195.789	1.11889	0.155074	7.21519	5.38583e-13	4.87251e-12
LINC01272	788.581	1.11881	0.0971755	11.5133	1.13126e-30	3.23848e-29
ESRRG	53.856	1.11832	0.248594	4.4986	6.84036e-06	2.7792e-05
LOC286437	170.966	1.11376	0.157898	7.05369	1.74231e-12	1.49606e-11
IRF4	5648.12	1.1134	0.0585937	19.002	1.64097e-80	2.16168e-78
DNHD1	260.736	1.11169	0.137343	8.09426	5.76144e-16	6.73054e-15
TUBA1A	6789.12	1.10991	0.0737401	15.0517	3.36543e-51	2.1812e-49
FGF14	1120.13	1.10978	0.092072	12.0534	1.86122e-33	5.90163e-32
FAM81A	1197.85	1.10975	0.0771649	14.3816	6.7546e-47	3.84017e-45
OSER1-AS1	93.325	1.10828	0.213172	5.19899	2.0037e-07	1.0092e-06
SLC46A3	832.758	1.10733	0.090915	12.1798	3.98041e-34	1.32705e-32
FKBP7	275.407	1.1068	0.14677	7.54104	4.66231e-14	4.5979e-13
BBS5	1337.41	1.10385	0.0933977	11.8188	3.12201e-32	9.47303e-31
LOC100130357	683.423	1.10303	0.115569	9.54431	1.37013e-21	2.36423e-20
ZSCAN23	111.314	1.10226	0.176969	6.22857	4.70718e-10	3.1939e-09
FAM189A2	193.322	1.102	0.153454	7.18129	6.9057e-13	6.18878e-12
LINC00999	75.725	1.10146	0.226484	4.8633	1.15447e-06	5.25445e-06
CCDC136	2097.85	1.09969	0.0815683	13.4819	1.99944e-41	9.20365e-40
GARNL3	185.661	1.09881	0.143514	7.65645	1.91144e-14	1.94909e-13
MDGA1	469.849	1.09817	0.107276	10.2369	1.35542e-24	2.78351e-23
SLC6A8	3989.37	1.09539	0.0821693	13.3309	1.52965e-40	6.77183e-39
SLC25A42	87.0547	1.0941	0.205323	5.32864	9.89483e-08	5.19527e-07
SHC2	600.635	1.09406	0.104441	10.4755	1.11969e-25	2.47846e-24
ZNF75D	250.728	1.09401	0.140691	7.77594	7.48918e-15	7.91566e-14
FSTL4	65.5916	1.09021	0.236845	4.60304	4.16372e-06	1.74553e-05
IFITM10	40.8805	1.08743	0.267334	4.06771	4.74783e-05	0.000169224
TMEM140	305.215	1.08712	0.124617	8.7237	2.6926e-18	3.72255e-17
EP300-AS1	119.553	1.08393	0.179948	6.0236	1.70575e-09	1.08984e-08
COL7A1	199.821	1.0838	0.144426	7.50422	6.17977e-14	6.03925e-13
ESR1	42.3531	1.08099	0.264434	4.08794	4.3523e-05	0.000156122
ARHGAP33	283.5	1.07901	0.124135	8.6922	3.55494e-18	4.83633e-17
DYRK1B	349.647	1.07888	0.127733	8.44635	3.00545e-17	3.84352e-16
MEX3B	103.791	1.07518	0.209415	5.13422	2.83315e-07	1.3987e-06
PLCL1	50.9919	1.07514	0.264046	4.07178	4.66559e-05	0.000166549
KLF15	697.018	1.07445	0.0985188	10.9061	1.07818e-27	2.65094e-26
ACAN	57.9692	1.07378	0.248071	4.32853	1.50107e-05	5.80888e-05
SCUBE2	57.124	1.07337	0.237477	4.51989	6.18729e-06	2.52908e-05
HOGA1	74.7929	1.07288	0.213356	5.02861	4.94048e-07	2.36207e-06
SLC45A2	6831.74	1.07274	0.0955301	11.2293	2.92757e-29	7.80188e-28
BBS1	308.123	1.07211	0.126361	8.48448	2.16689e-17	2.79985e-16
OGDH	9775.62	1.07173	0.0667961	16.0448	6.21814e-58	4.8207e-56
RASGRP3	876.397	1.07136	0.0847031	12.6484	1.14245e-36	4.21666e-35
TMEM59	3820.21	1.07124	0.0736139	14.5522	5.65449e-48	3.31956e-46
PNPLA7	134.52	1.07063	0.186269	5.74775	9.04386e-09	5.38543e-08
FAHD2A	499.806	1.06969	0.117867	9.07537	1.13296e-19	1.72532e-18
MTMR9LP	269.725	1.06665	0.125382	8.50718	1.78219e-17	2.312e-16
TTC21A	128.59	1.06475	0.171968	6.19158	5.9566e-10	3.99316e-09
PDCD4-AS1	102.864	1.06424	0.193513	5.49958	3.80697e-08	2.09882e-07
CATSPER2	59.3964	1.0635	0.24876	4.27521	1.90956e-05	7.26474e-05
LOC100506258	249.062	1.0602	0.143504	7.3879	1.4916e-13	1.41584e-12
MPC1	814.39	1.05966	0.0932271	11.3664	6.14761e-30	1.6883e-28
SLC26A4	1722.75	1.05943	0.203688	5.20124	1.97963e-07	9.97697e-07
LAMB2	3294.01	1.05942	0.076733	13.8066	2.32699e-43	1.16731e-41
CDK2AP2	502.177	1.05861	0.10609	9.97843	1.89446e-23	3.66301e-22
MIB2	410.992	1.05853	0.121372	8.72134	2.74923e-18	3.79435e-17
LINC00476	42.6403	1.05709	0.283666	3.72653	0.000194134	0.000625979
PLA1A	357.348	1.05638	0.142457	7.41539	1.21267e-13	1.1606e-12
TTLL1	136.913	1.0557	0.167395	6.30667	2.85106e-10	1.97502e-09
MGC16275	65.6287	1.05358	0.226165	4.65846	3.18583e-06	1.35842e-05
AUTS2	113.623	1.05275	0.194511	5.41229	6.2225e-08	3.35853e-07
LINC00472	265.532	1.05236	0.154743	6.80068	1.04127e-11	8.36472e-11
MIR181A2HG	32.5906	1.05216	0.29018	3.6259	0.000287957	0.000898472
TRIM22	99.7681	1.05213	0.187644	5.60705	2.05807e-08	1.1713e-07
LYRM9	56.7401	1.05149	0.238531	4.4082	1.04232e-05	4.13229e-05
SH3PXD2A	132.081	1.05051	0.178413	5.88808	3.90704e-09	2.41533e-08
COL11A2	319.101	1.05046	0.14432	7.27868	3.37094e-13	3.1069e-12
PC	918.7	1.04857	0.0881244	11.8987	1.20179e-32	3.71615e-31
SMPD1	2825.55	1.04812	0.077738	13.4828	1.9752e-41	9.11802e-40
ZNF345	73.3868	1.04511	0.222171	4.70409	2.55007e-06	1.10715e-05
LOC171391	64.7793	1.04483	0.22915	4.55959	5.12543e-06	2.11856e-05
C15orf52	1098.5	1.04356	0.0826804	12.6216	1.60597e-36	5.86819e-35
RAPGEF1	4700.24	1.04306	0.0644007	16.1965	5.34058e-59	4.24183e-57
ASIC3	95.8874	1.04114	0.196272	5.30459	1.12927e-07	5.89106e-07
NDRG2	1134.61	1.03931	0.0793981	13.0898	3.7648e-39	1.57219e-37
OTX1	299.114	1.03813	0.135353	7.66978	1.72287e-14	1.76906e-13
ZNF610	53.477	1.03632	0.248889	4.16379	3.13009e-05	0.000114718
ZBTB47	95.6349	1.03465	0.193864	5.33697	9.45128e-08	4.97367e-07
RTTN	2100.27	1.0346	0.0678125	15.2568	1.48307e-52	9.88896e-51
MACROD2	47.7424	1.03459	0.254123	4.07122	4.67678e-05	0.000166912
LOC146880	525.083	1.03345	0.100704	10.2623	1.04235e-24	2.157e-23
NCALD	2589.66	1.03331	0.092385	11.1849	4.83695e-29	1.26408e-27
TMEM150C	253.596	1.033	0.137842	7.49413	6.67382e-14	6.49465e-13
ZNF629	1143.9	1.03283	0.0881557	11.716	1.05506e-31	3.14827e-30
CRYAB	34.864	1.03219	0.285984	3.60925	0.000307083	0.000952826
CRTC1	613.097	1.03206	0.0987149	10.455	1.39001e-25	3.05595e-24
PTTG1IP	25100.6	1.0315	0.0739336	13.9517	3.07171e-44	1.59522e-42
ANKRD36C	268.476	1.03025	0.153155	6.7268	1.73431e-11	1.36149e-10
DNAJB5	376.455	1.0281	0.115436	8.90624	5.27931e-19	7.70637e-18
KIAA1211	2262.64	1.02684	0.0643208	15.9644	2.2629e-57	1.73771e-55
RPS6KC1	2929.11	1.02623	0.0674788	15.2082	3.12085e-52	2.04725e-50
LGI3	4936.2	1.02571	0.205715	4.98607	6.16187e-07	2.91166e-06
C14orf37	248.712	1.02509	0.131726	7.78195	7.14136e-15	7.58266e-14
POLN	53.6245	1.02482	0.246231	4.16204	3.15417e-05	0.00011547
CHGA	219.223	1.0243	0.134992	7.58789	3.25152e-14	3.24611e-13
IDUA	200.002	1.02353	0.140751	7.2719	3.54461e-13	3.25586e-12
SLC3A2	4497.23	1.02256	0.0799928	12.7832	2.03643e-37	7.83758e-36
GRN	9011.38	1.02202	0.0958633	10.6613	1.54505e-26	3.64402e-25
ZDHHC8P1	32.9872	1.02164	0.287986	3.54753	0.00038886	0.00118612
SOCS6	2232.79	1.02072	0.0956849	10.6675	1.44444e-26	3.41669e-25
NPHP3-ACAD11	69.1301	1.01883	0.223549	4.55751	5.17625e-06	2.13793e-05
CCT6B	38.0716	1.01711	0.272043	3.7388	0.000184898	0.000597867
ZSCAN16-AS1	57.8578	1.01276	0.23794	4.25638	2.07768e-05	7.85823e-05
CLCN6	1064.33	1.01248	0.0782426	12.9403	2.66557e-38	1.06118e-36
ZNF197	468.384	1.01232	0.108922	9.29398	1.48629e-20	2.38311e-19
C10orf11	148.1	1.01198	0.159716	6.33614	2.35593e-10	1.64539e-09
C9orf9	50.2023	1.01187	0.248056	4.07918	4.51951e-05	0.000161619
HFM1	70.0437	1.01168	0.21482	4.70942	2.48421e-06	1.08029e-05
TMEM117	1427.21	1.0088	0.0958473	10.5251	6.62203e-26	1.49438e-24
ANKDD1A	37.4033	1.00462	0.275509	3.64641	0.000265927	0.000836339
LINC00511	232.045	1.00412	0.134355	7.47364	7.80056e-14	7.55484e-13
ZSWIM5	265.196	1.00328	0.126232	7.94788	1.89725e-15	2.11861e-14
ST3GAL3	73.8481	1.00326	0.211607	4.74117	2.12485e-06	9.33696e-06
TRAPPC6A	125.961	1.00308	0.17191	5.83488	5.38301e-09	3.29012e-08
ADCY2	6195.56	1.00298	0.0643282	15.5917	8.29593e-55	5.97418e-53
LINC00938	280.161	1.0025	0.13051	7.68146	1.57285e-14	1.61912e-13
RNASEL	600.992	1.00188	0.114494	8.75052	2.12372e-18	2.96133e-17
FLG-AS1	251.921	1.0018	0.134137	7.4685	8.11134e-14	7.82776e-13
LINC01004	392.998	1.00016	0.117534	8.50957	1.74579e-17	2.26841e-16
PBXIP1	2108.55	0.996387	0.0771636	12.9127	3.81869e-38	1.51282e-36
TMEM176B	32.2479	0.996059	0.291696	3.41471	0.000638491	0.00186405
EML6	215.4	0.995508	0.138363	7.19488	6.25148e-13	5.62425e-12
ALMS1P	236.401	0.994833	0.149854	6.63867	3.16524e-11	2.41234e-10
RTP4	98.2671	0.993928	0.197575	5.03064	4.88843e-07	2.34133e-06
MFGE8	1146.47	0.992853	0.0856155	11.5966	4.28536e-31	1.24437e-29
MET	40782.3	0.990228	0.0717155	13.8077	2.28929e-43	1.15197e-41
LOC728392	46.2651	0.990099	0.280031	3.53568	0.000406722	0.00123572
SLC7A5P2	65.0529	0.989894	0.239184	4.13863	3.49382e-05	0.000127043
NPAS3	63.3416	0.988045	0.226687	4.35862	1.30883e-05	5.12865e-05
MCC	4108.82	0.987969	0.0624456	15.8213	2.21946e-56	1.63464e-54
LINC00685	33.86	0.987965	0.292014	3.38328	0.000716254	0.00207055
AASS	2794.92	0.985708	0.165897	5.94169	2.82091e-09	1.76817e-08
SPEF2	204.292	0.985338	0.146797	6.71224	1.91654e-11	1.49728e-10
ATP2A1	66.1815	0.984568	0.220411	4.46697	7.93343e-06	3.19367e-05
SLC2A8	121.355	0.983869	0.176591	5.57145	2.52624e-08	1.42474e-07
HMGCS1	7314.76	0.983304	0.0949194	10.3594	3.79489e-25	8.14419e-24
PCDHB15	76.8205	0.981895	0.212278	4.62551	3.73679e-06	1.58252e-05
LINC01560	55.3204	0.980875	0.236625	4.14527	3.39411e-05	0.000123584
EPHX1	2027.82	0.98034	0.0927033	10.575	3.89056e-26	9.03133e-25
ASMTL-AS1	221.638	0.978436	0.182786	5.3529	8.65547e-08	4.59066e-07
L3MBTL1	80.2005	0.977788	0.206258	4.74061	2.13077e-06	9.35888e-06
ABCA7	240.636	0.977122	0.1282	7.62183	2.50102e-14	2.52329e-13
LOC100289230	54.4298	0.976921	0.258226	3.7832	0.000154824	0.000507815
C1QTNF1	485.31	0.97668	0.136141	7.17405	7.28112e-13	6.50723e-12
CCDC159	42.5436	0.976616	0.271881	3.59207	0.000328064	0.00101346
AGPAT4	149.371	0.976588	0.164272	5.94496	2.76521e-09	1.73527e-08
THBS3	509.528	0.974714	0.104999	9.28311	1.64598e-20	2.63276e-19
NNT	12033.7	0.97385	0.0660961	14.7338	3.90855e-49	2.35429e-47
UST	815.204	0.973062	0.0933385	10.4251	1.90476e-25	4.16503e-24
TRO	1137.32	0.972185	0.0911015	10.6714	1.38453e-26	3.27975e-25
DTNA	193.884	0.972051	0.142514	6.82074	9.05704e-12	7.31197e-11
CLIC4	7132.69	0.971341	0.0674837	14.3937	5.66648e-47	3.24431e-45
PCDHB10	33.1113	0.9692	0.292231	3.31655	0.00091136	0.00258115
LINC01057	36.0324	0.969055	0.280464	3.45518	0.000549925	0.00162481
ACADS	172.982	0.968502	0.147585	6.56233	5.29726e-11	3.94084e-10
TBCK	502.435	0.967719	0.098565	9.81808	9.41193e-23	1.75088e-21
KLF14	73.3229	0.967337	0.211608	4.57137	4.84541e-06	2.01102e-05
HIST1H3E	79.0795	0.966583	0.213848	4.51996	6.18524e-06	2.52888e-05
RNF24	660.408	0.966339	0.0968145	9.98134	1.8397e-23	3.56137e-22
ZMAT3	3915.19	0.966307	0.0792265	12.1968	3.23452e-34	1.08444e-32
ST7	5744.63	0.965259	0.0813197	11.8699	1.696e-32	5.21447e-31
ZNF10	311.667	0.964886	0.125789	7.67068	1.71092e-14	1.7579e-13
TAPBPL	414.081	0.963712	0.126881	7.59539	3.06872e-14	3.07118e-13
NCKAP5	175.76	0.963098	0.166647	5.77928	7.50223e-09	4.50384e-08
PRKCE	1287.44	0.962497	0.0739249	13.0199	9.42563e-39	3.85666e-37
LOC100507373	37.1141	0.962096	0.281535	3.41732	0.000632398	0.00184759
CABLES1	7860.68	0.960803	0.0612493	15.6868	1.86283e-55	1.35351e-53
UAP1L1	2622.98	0.960402	0.0650139	14.7723	2.21157e-49	1.36251e-47
PPIEL	203.154	0.960072	0.144611	6.639	3.15824e-11	2.40814e-10
DECR1	2488.56	0.959721	0.0789045	12.1631	4.88839e-34	1.61977e-32
PCYT2	2890.77	0.958457	0.0736328	13.0167	9.83137e-39	4.01254e-37
EPB41L4A	317.517	0.957126	0.121613	7.87025	3.53929e-15	3.86696e-14
FAT4	67.5168	0.956903	0.240765	3.97443	7.05493e-05	0.000245198
C7orf31	942.754	0.95689	0.0805694	11.8766	1.5661e-32	4.82425e-31
TNKS	3430.24	0.95629	0.0694336	13.7727	3.719e-43	1.85412e-41
SSPN	143.023	0.956139	0.162896	5.86962	4.36802e-09	2.68596e-08
SLFN5	1076.31	0.954006	0.0784426	12.1618	4.96316e-34	1.64118e-32
ACACB	1543.39	0.953365	0.0754848	12.6299	1.44457e-36	5.31961e-35
FN3K	149.965	0.952698	0.157127	6.06325	1.33396e-09	8.61808e-09
STARD5	91.1615	0.952203	0.199957	4.76203	1.91656e-06	8.47082e-06
MEGF10	1178.04	0.951491	0.0867916	10.9629	5.76017e-28	1.43809e-26
IDNK	46.872	0.950627	0.251007	3.78726	0.000152319	0.000500005
NPIPB5	340.061	0.950436	0.129947	7.31404	2.59219e-13	2.40833e-12
HP1BP3	9444.14	0.950372	0.0644014	14.757	2.77301e-49	1.68281e-47
STOX2	175.287	0.950337	0.161317	5.89111	3.83621e-09	2.37335e-08
KANSL1L	429.108	0.948021	0.110857	8.55171	1.21281e-17	1.59895e-16
NIPAL2	248.187	0.945857	0.132242	7.15246	8.52354e-13	7.57165e-12
TSGA10	110.587	0.944717	0.178521	5.29192	1.2104e-07	6.28593e-07
SORBS1	4880.21	0.944292	0.0904794	10.4365	1.68861e-25	3.70238e-24
LPIN3	1599.24	0.943742	0.0773607	12.1992	3.13755e-34	1.05472e-32
HIST1H2BJ	49.5127	0.943609	0.25547	3.69362	0.000221083	0.000706132
GABRA3	209.489	0.942754	0.152618	6.17723	6.5237e-10	4.35173e-09
KLHDC1	57.2861	0.942035	0.247609	3.80452	0.000142079	0.000470107
TRIM14	969.035	0.941462	0.0916298	10.2746	9.17003e-25	1.91966e-23
PPM1K	313.992	0.941448	0.136344	6.90496	5.02188e-12	4.14094e-11
RAB9B	226.085	0.940032	0.148162	6.34462	2.22968e-10	1.56261e-09
AIF1L	1581.91	0.939398	0.0795315	11.8117	3.39818e-32	1.02917e-30
ZNF529-AS1	51.7041	0.939201	0.24319	3.862	0.000112463	0.000379395
GPR143	2212.78	0.937779	0.0734759	12.7631	2.63556e-37	9.97758e-36
RNF122	123.794	0.937743	0.17036	5.50448	3.70249e-08	2.044e-07
C11orf71	228.091	0.937595	0.133511	7.02262	2.17751e-12	1.85208e-11
RNF139-AS1	45.1445	0.937406	0.257305	3.64318	0.000269292	0.0008461
MAGI3	565.581	0.936024	0.106988	8.74883	2.15571e-18	3.00076e-17
ATG2A	942.689	0.935999	0.0976963	9.5807	9.63874e-22	1.68475e-20
TRAF3IP2-AS1	128.131	0.935654	0.170331	5.49314	3.94853e-08	2.17391e-07
SMOX	321.62	0.935578	0.116097	8.05858	7.71866e-16	8.93324e-15
MARCKS	2255.88	0.934332	0.0741306	12.6039	2.01057e-36	7.30431e-35
RNASE4	55.1292	0.933576	0.241153	3.8713	0.000108258	0.000366431
ZNF117	33.5049	0.932509	0.280961	3.319	0.000903411	0.00256132
PCMTD1	1544.91	0.931712	0.0906541	10.2777	8.88551e-25	1.86251e-23
PDE6D	966.976	0.930612	0.0946822	9.8288	8.46239e-23	1.57968e-21
ZNF251	315.393	0.929624	0.139053	6.68538	2.30323e-11	1.77795e-10
MTMR10	2028.01	0.929581	0.0759979	12.2317	2.10586e-34	7.15331e-33
CTSD	17144.9	0.92804	0.0777949	11.9293	8.3258e-33	2.58435e-31
TSNARE1	218.527	0.9267	0.135803	6.82386	8.86277e-12	7.1587e-11
ZNF554	43.0121	0.926127	0.276398	3.3507	0.000806083	0.00230759
DIP2C	2138.65	0.925436	0.0757589	12.2155	2.56801e-34	8.6506e-33
SLC25A23	4946.64	0.924308	0.0772137	11.9708	5.05538e-33	1.58438e-31
ARFGEF3	543.279	0.924256	0.101081	9.14375	6.03207e-20	9.39784e-19
C19orf12	1175.82	0.923978	0.0834785	11.0685	1.78452e-28	4.5463e-27
PELI2	359.641	0.923699	0.114763	8.04877	8.36298e-16	9.63765e-15
TSC22D3	326.337	0.92316	0.13331	6.92493	4.36202e-12	3.61708e-11
TCFL5	3472.4	0.922455	0.0593473	15.5433	1.76554e-54	1.24922e-52
FLYWCH1	1589.1	0.922243	0.0799155	11.5402	8.2703e-31	2.38017e-29
AGBL2	43.0486	0.920216	0.261757	3.51553	0.000438877	0.00132423
SMIM2-AS1	78.5777	0.920131	0.213298	4.31382	1.60458e-05	6.17994e-05
CD79B	32.301	0.919765	0.302316	3.04239	0.00234706	0.00613179
SMIM14	296.631	0.918871	0.129387	7.10174	1.23196e-12	1.07841e-11
SOX9	251.602	0.91877	0.136537	6.7291	1.70719e-11	1.34214e-10
TM4SF18	923.383	0.91876	0.0926865	9.91256	3.67127e-23	7.00656e-22
SNAI3-AS1	145.998	0.916811	0.159652	5.74255	9.32614e-09	5.54945e-08
POU3F1	201.434	0.915551	0.138846	6.594	4.28144e-11	3.21614e-10
SLC25A27	277.732	0.915445	0.136203	6.72119	1.80249e-11	1.41159e-10
SIRT2	1279.1	0.914518	0.0782065	11.6936	1.37384e-31	4.07699e-30
TMEM175	436.78	0.913774	0.111515	8.1942	2.5227e-16	3.03905e-15
NRSN2-AS1	202.449	0.913431	0.137283	6.65364	2.85936e-11	2.19056e-10
ZNF493	234.133	0.910809	0.143494	6.34737	2.19025e-10	1.53763e-09
FEZ1	112.447	0.910802	0.17732	5.1365	2.79902e-07	1.38312e-06
NCAM2	380.019	0.910157	0.113468	8.02129	1.04644e-15	1.19321e-14
FAM214A	596.54	0.908921	0.0961679	9.45139	3.34369e-21	5.58533e-20
TPP1	23744.3	0.908915	0.0883967	10.2822	8.47539e-25	1.77884e-23
ERVK13-1	377.191	0.908574	0.119574	7.59845	2.99699e-14	3.00311e-13
GTF2IP20	224.363	0.908512	0.133328	6.81412	9.48447e-12	7.64942e-11
ANKRD29	36.6508	0.906638	0.275328	3.29294	0.00099146	0.00278658
CUBN	318.415	0.905467	0.120836	7.49338	6.71234e-14	6.52821e-13
HLA-A	7414.9	0.905105	0.0804723	11.2474	2.38499e-29	6.41927e-28
RENBP	37.1178	0.904367	0.275855	3.27841	0.00104393	0.00291836
FOXN3	1406.97	0.904142	0.0745523	12.1276	7.54076e-34	2.46337e-32
SRP14-AS1	122.369	0.902248	0.177863	5.07272	3.92161e-07	1.89961e-06
FAM149B1	522.69	0.901988	0.10172	8.86738	7.48895e-19	1.08149e-17
PEBP1	18518.6	0.901711	0.0821218	10.9802	4.76069e-28	1.20152e-26
ST20-AS1	125.854	0.900969	0.177537	5.07482	3.87862e-07	1.88103e-06
STXBP1	8823.04	0.900832	0.0719984	12.5118	6.43289e-36	2.30093e-34
DMXL2	3966.62	0.900754	0.0772771	11.6562	2.13467e-31	6.26594e-30
LOC728743	123.064	0.900594	0.176254	5.10964	3.22774e-07	1.57908e-06
CSAD	214.833	0.899723	0.147777	6.08839	1.14052e-09	7.42461e-09
PNRC1	1091.16	0.899623	0.0943127	9.53873	1.44598e-21	2.48981e-20
ACCS	158.737	0.898498	0.162291	5.53632	3.08891e-08	1.71874e-07
LINC00847	226.266	0.897678	0.142212	6.31227	2.74971e-10	1.90808e-09
NPIPB3	278.117	0.897467	0.126454	7.09721	1.27303e-12	1.11317e-11
KIAA1324L	745.167	0.897444	0.0912472	9.83531	7.93253e-23	1.48248e-21
ARSA	737.29	0.897044	0.106427	8.42869	3.49547e-17	4.44212e-16
SS18L1	2400.06	0.896918	0.0868145	10.3314	5.0797e-25	1.08298e-23
SYNE2	8232.67	0.895581	0.19889	4.5029	6.70324e-06	2.72759e-05
TOM1L2	935.735	0.89508	0.0851743	10.5088	7.86781e-26	1.75837e-24
CRISPLD2	32.2404	0.894667	0.292101	3.06286	0.00219229	0.00576838
MYLK3	37.1453	0.894637	0.28484	3.14084	0.00168467	0.00453659
PCDHB9	68.0319	0.892981	0.218911	4.07919	4.51932e-05	0.000161619
APBA1	448.117	0.892849	0.101252	8.81812	1.16396e-18	1.64426e-17
ANKRD20A5P	67.2864	0.892309	0.220778	4.04166	5.30733e-05	0.00018772
DSCR8	89.6449	0.891565	0.193986	4.59601	4.30648e-06	1.80165e-05
ZZZ3	3401.03	0.89127	0.0838239	10.6326	2.10062e-26	4.91144e-25
CYB5D2	483.721	0.891178	0.10813	8.24169	1.69791e-16	2.07007e-15
SYNC	241.638	0.891117	0.141003	6.31986	2.61808e-10	1.82142e-09
C21orf2	106.654	0.890943	0.206362	4.31738	1.57891e-05	6.09119e-05
NINL	635.608	0.88994	0.104008	8.55644	1.16408e-17	1.53596e-16
AIFM3	52.5004	0.889829	0.245925	3.61829	0.00029655	0.000923862
RTN4R	195.237	0.889561	0.150575	5.90777	3.46771e-09	2.15442e-08
RILP	136.4	0.888595	0.182908	4.85815	1.18489e-06	5.38231e-06
ARHGEF37	208.432	0.888525	0.145865	6.09143	1.11908e-09	7.29087e-09
C9orf43	41.9985	0.888248	0.264145	3.36273	0.000771757	0.00221924
HCN2	199.22	0.88759	0.143537	6.18368	6.26231e-10	4.18598e-09
TULP3	1421.55	0.886918	0.0985778	8.99714	2.31683e-19	3.47267e-18
CROCCP3	153.018	0.88688	0.174895	5.07095	3.95844e-07	1.91688e-06
COMMD3	189.112	0.886363	0.151729	5.84175	5.16559e-09	3.16439e-08
PHYHD1	53.9808	0.886214	0.23873	3.7122	0.000205463	0.000660276
GLI4	309.173	0.885726	0.144186	6.14295	8.10042e-10	5.34627e-09
KCNJ10	67.1658	0.885272	0.230831	3.83515	0.000125487	0.000419837
SMG1P3	148.206	0.884419	0.176706	5.00502	5.5857e-07	2.65567e-06
AMZ1	321.845	0.884265	0.144084	6.13714	8.40195e-10	5.54077e-09
DEXI	359.612	0.883012	0.124634	7.08482	1.39229e-12	1.21221e-11
PHF7	278.27	0.88262	0.141852	6.22213	4.90449e-10	3.32222e-09
UBAP1L	1471.52	0.881753	0.0772998	11.4069	3.86139e-30	1.07134e-28
DOPEY1	545.917	0.881143	0.103074	8.54861	1.24579e-17	1.63843e-16
LINC00174	129.787	0.880859	0.172209	5.11507	3.13621e-07	1.53848e-06
TRABD2A	64.8491	0.879945	0.218375	4.02951	5.58942e-05	0.000197224
IRAK4	1185.48	0.878499	0.0803268	10.9366	7.70583e-28	1.91206e-26
PTPN21	751.033	0.878484	0.109404	8.02975	9.76754e-16	1.1161e-14
LURAP1	185.641	0.877061	0.161733	5.42288	5.86467e-08	3.17492e-07
SEPT5-GP1BB	45.5876	0.875529	0.257445	3.40084	0.000671797	0.00195284
CDK18	452.719	0.874453	0.108933	8.02746	9.95135e-16	1.13631e-14
LINC00894	48.6547	0.874063	0.250569	3.4883	0.000486094	0.00145259
TACC1	12158.3	0.873366	0.0776208	11.2517	2.27156e-29	6.13434e-28
NIPSNAP3A	382.567	0.873062	0.120349	7.25444	4.03337e-13	3.68391e-12
OPRL1	128.186	0.872446	0.1777	4.90967	9.12321e-07	4.21389e-06
PTCHD4	247.476	0.872	0.128172	6.80337	1.02198e-11	8.21793e-11
SLC25A5-AS1	57.3626	0.871381	0.235845	3.69472	0.000220131	0.000703508
ZC3H6	394.53	0.869866	0.124308	6.99769	2.60225e-12	2.20064e-11
PPIC	1258.14	0.869556	0.0736695	11.8035	3.74527e-32	1.13007e-30
MPZ	56.5039	0.868478	0.252256	3.44285	0.000575616	0.00169411
C20orf194	1054.61	0.867853	0.0773461	11.2204	3.23885e-29	8.60313e-28
PPP2R5B	336.458	0.866915	0.130862	6.62463	3.48118e-11	2.64071e-10
ENPP5	98.3312	0.866479	0.215423	4.02223	5.76506e-05	0.000202936
HCN3	424.471	0.866382	0.111632	7.76108	8.42096e-15	8.86005e-14
DYNC1I1	796.212	0.865799	0.0856355	10.1103	4.97371e-24	9.99864e-23
PPP1R26-AS1	60.3349	0.865627	0.232742	3.71925	0.000199818	0.000643284
C1QTNF9B-AS1	37.4187	0.864869	0.275071	3.14416	0.00166562	0.00448902
GGT1	34.1573	0.863763	0.278039	3.10663	0.00189235	0.0050389
FAM161B	98.7685	0.863362	0.186675	4.62496	3.74679e-06	1.58593e-05
GAS1	416.982	0.863239	0.125054	6.90294	5.09367e-12	4.19587e-11
MXI1	5494.73	0.862929	0.0820012	10.5234	6.74125e-26	1.51917e-24
BBS9	828.604	0.862709	0.0887677	9.71873	2.50901e-22	4.56269e-21
STARD10	1141.48	0.86259	0.0772836	11.1614	6.30207e-29	1.63642e-27
RCBTB2	180.913	0.862353	0.152815	5.64311	1.67005e-08	9.61955e-08
FAM120C	559.87	0.862063	0.103539	8.326	8.36229e-17	1.03907e-15
SPSB3	203.813	0.861918	0.148108	5.8195	5.90223e-09	3.59121e-08
ZNF836	165.355	0.861487	0.173993	4.95128	7.37261e-07	3.44757e-06
CMC4	92.5405	0.86049	0.195868	4.39322	1.11686e-05	4.41916e-05
CEP295NL	44.6352	0.860017	0.277506	3.0991	0.0019411	0.0051594
GLUD1P3	110.674	0.858554	0.184651	4.64959	3.32591e-06	1.41592e-05
ZER1	1056.48	0.85684	0.0788372	10.8685	1.62904e-27	3.98721e-26
GLUL	4343.34	0.855909	0.0771395	11.0956	1.31788e-28	3.37872e-27
PAXIP1-AS2	281.654	0.855397	0.12529	6.82734	8.65039e-12	6.99412e-11
HYI	38.5717	0.854722	0.266659	3.2053	0.00134922	0.00369467
JUP	122.054	0.854325	0.186258	4.58679	4.50117e-06	1.87728e-05
CCNG2	1063.25	0.853978	0.0851317	10.0312	1.11101e-23	2.17413e-22
RAB38	9255.22	0.85392	0.0669292	12.7586	2.79289e-37	1.0524e-35
LINC00632	76.2262	0.853918	0.210538	4.05588	4.99449e-05	0.000177211
FTX	41.9441	0.853761	0.261789	3.26125	0.0011092	0.0030854
NBEAL1	825.151	0.853549	0.108286	7.88233	3.21319e-15	3.52494e-14
PLA2G6	538.161	0.853528	0.0959975	8.89114	6.04848e-19	8.77381e-18
HBP1	2485.57	0.851831	0.0703288	12.1121	9.11044e-34	2.95824e-32
ARHGAP4	171.332	0.850792	0.161227	5.27699	1.31321e-07	6.78725e-07
SLC22A15	83.7103	0.850164	0.206424	4.11853	3.81298e-05	0.000137783
EVI5L	502.002	0.850145	0.0992038	8.56968	1.03772e-17	1.3737e-16
C17orf97	177.38	0.850075	0.159988	5.31338	1.07613e-07	5.62466e-07
WDR81	130.978	0.849724	0.172181	4.93505	8.01297e-07	3.72872e-06
ZNF767P	478.105	0.849323	0.104553	8.12337	4.5343e-16	5.32001e-15
NAP1L3	95.2125	0.848669	0.199704	4.24963	2.14119e-05	8.07207e-05
KRCC1	535.416	0.846762	0.0956635	8.85147	8.63764e-19	1.23855e-17
STAG3L3	50.8013	0.846559	0.261578	3.23635	0.00121068	0.00334584
AMDHD2	2187.33	0.846378	0.0735223	11.5119	1.1498e-30	3.28576e-29
KLHL3	44.4455	0.846371	0.256695	3.29719	0.000976591	0.00274901
GPR153	295.635	0.846211	0.130277	6.49548	8.27708e-11	6.04387e-10
SGMS1-AS1	33.773	0.844639	0.283338	2.98103	0.00287284	0.00734553
CCDC78	446.986	0.843748	0.107591	7.84217	4.42826e-15	4.7962e-14
LDB1	2113.65	0.843596	0.074955	11.2547	2.19545e-29	5.9387e-28
ITPK1	2893.93	0.843576	0.0682506	12.36	4.30291e-35	1.49293e-33
GALNT18	199.349	0.843276	0.148356	5.68414	1.31473e-08	7.65177e-08
FAM69B	937.832	0.843035	0.0812612	10.3744	3.24281e-25	6.98714e-24
LOC100129534	62.0854	0.84285	0.227583	3.70349	0.000212655	0.000681768
SH3BGR	90.9298	0.842782	0.197797	4.26084	2.03657e-05	7.71173e-05
ALDOC	167.538	0.842732	0.158064	5.3316	9.73505e-08	5.11469e-07
DNAJC27	335.995	0.842647	0.119827	7.03221	2.03286e-12	1.73269e-11
TMEM143	190.076	0.84234	0.152276	5.53166	3.17205e-08	1.76318e-07
C5orf45	148.64	0.842287	0.156279	5.38965	7.0597e-08	3.78518e-07
PDE4D	1687.62	0.842157	0.0851419	9.89122	4.54467e-23	8.61255e-22
DHRS12	144.061	0.841761	0.158693	5.30432	1.13092e-07	5.89314e-07
OTUD1	143.735	0.841393	0.17004	4.9482	7.49017e-07	3.49951e-06
NIM1K	42.446	0.840818	0.266392	3.15632	0.00159775	0.00432552
CASC9	35.0153	0.839927	0.276393	3.03888	0.00237457	0.00619967
HYAL1	83.9778	0.839862	0.204379	4.10934	3.96784e-05	0.000143091
PKIB	56.6957	0.839613	0.241031	3.48343	0.00049504	0.00147637
NBR2	48.9135	0.839361	0.249775	3.36046	0.000778115	0.00223503
LHPP	110.571	0.83847	0.189742	4.419	9.91607e-06	3.94089e-05
UBE2Q2P1	105.407	0.838131	0.19341	4.33344	1.46795e-05	5.68886e-05
RGL1	469.68	0.835676	0.111887	7.46893	8.08511e-14	7.80709e-13
NPIPB11	35.8831	0.83507	0.280555	2.97649	0.00291567	0.00744564
ING4	219.95	0.834705	0.13358	6.24873	4.13808e-10	2.81957e-09
LOC100419583	754.566	0.834678	0.0913006	9.14209	6.12593e-20	9.52576e-19
MLANA	33500.1	0.834572	0.186234	4.4813	7.41908e-06	3.00228e-05
FAM134A	3403.82	0.834118	0.0658343	12.67	8.67485e-37	3.22382e-35
CNTN3	145.21	0.833802	0.180696	4.61439	3.94256e-06	1.66141e-05
RBM43	541.724	0.833594	0.106967	7.79303	6.54224e-15	6.96478e-14
SDHAP3	169.681	0.83303	0.147426	5.65048	1.60002e-08	9.2359e-08
STX7	6204.68	0.832637	0.164031	5.07609	3.85282e-07	1.86908e-06
CBY1	472.541	0.831399	0.105075	7.91242	2.52425e-15	2.78994e-14
CDKN2C	599.112	0.83132	0.104024	7.99161	1.33184e-15	1.4986e-14
RAB5B	10980.5	0.831273	0.065886	12.6168	1.70518e-36	6.20877e-35
THRA	890.17	0.830715	0.0926749	8.96375	3.13818e-19	4.66068e-18
SCPEP1	2985.6	0.830677	0.0716401	11.5951	4.36105e-31	1.26408e-29
IFT172	1965.3	0.830084	0.066779	12.4303	1.78939e-35	6.30292e-34
EPOR	334.443	0.829593	0.124459	6.66561	2.63562e-11	2.02489e-10
UBA7	104.136	0.82927	0.182666	4.53982	5.63034e-06	2.31662e-05
SYT13	561.63	0.829128	0.0967642	8.56854	1.04806e-17	1.38513e-16
ADD1	8470.94	0.827405	0.064765	12.7755	2.24718e-37	8.56729e-36
TTC3P1	42.4646	0.827046	0.259168	3.19116	0.00141702	0.00386531
GPAT4	22012.5	0.826861	0.0622841	13.2756	3.20538e-40	1.39241e-38
FHOD3	514.747	0.826246	0.114469	7.21807	5.27311e-13	4.77319e-12
SESN3	1643.5	0.825094	0.106247	7.76581	8.11225e-15	8.54635e-14
ZKSCAN1	7233.19	0.824761	0.0748014	11.026	2.86274e-28	7.25899e-27
GRIK2	687.665	0.824582	0.105828	7.79174	6.60949e-15	7.03175e-14
TRPC1	634.59	0.821948	0.106904	7.68869	1.48654e-14	1.53613e-13
TM7SF2	172.873	0.821685	0.161828	5.07751	3.82412e-07	1.85627e-06
SLCO4A1-AS1	1087.2	0.820031	0.0968952	8.46307	2.60424e-17	3.34893e-16
FAM13A-AS1	36.0234	0.819757	0.282075	2.90617	0.0036588	0.00914164
MEGF8	3632.91	0.819723	0.0654424	12.5259	5.38936e-36	1.93623e-34
SMAD9	1520.42	0.819214	0.10146	8.07425	6.78908e-16	7.88556e-15
PLEKHG3	1507.28	0.818772	0.0870425	9.40657	5.12578e-21	8.42323e-20
FAM127A	1798.78	0.81844	0.0829784	9.8633	6.00435e-23	1.13522e-21
VPS13D	3967.94	0.818248	0.0723922	11.303	1.26831e-29	3.45968e-28
TMEM50B	926.239	0.818173	0.0815952	10.0272	1.15725e-23	2.25915e-22
SFXN3	1998.95	0.817232	0.0770633	10.6047	2.83385e-26	6.60675e-25
PPOX	165.881	0.816532	0.158178	5.16209	2.44205e-07	1.2145e-06
TTLL7	1266.42	0.816349	0.0878227	9.29543	1.46612e-20	2.35436e-19
MAP3K11	1940.42	0.81595	0.0802007	10.1738	2.59447e-24	5.26135e-23
MDGA2	1184.78	0.815767	0.0885193	9.2157	3.09252e-20	4.88859e-19
CIC	4735.39	0.814617	0.0673918	12.0878	1.2258e-33	3.94863e-32
EDNRB	16538.7	0.813839	0.0783324	10.3896	2.7662e-25	5.99207e-24
MVD	796.11	0.813032	0.0920496	8.83254	1.02327e-18	1.45057e-17
TLN2	179.705	0.812549	0.160136	5.07411	3.89317e-07	1.88696e-06
C8orf44	73.4911	0.812188	0.20929	3.88069	0.00010416	0.000353668
RRAGB	364.147	0.811296	0.119693	6.77816	1.21719e-11	9.70575e-11
GOT1	3458.45	0.811111	0.0623478	13.0095	1.08103e-38	4.37897e-37
A1BG-AS1	164.777	0.80837	0.149985	5.38969	7.05809e-08	3.78518e-07
C5orf42	2277.66	0.808284	0.100926	8.00867	1.15959e-15	1.3139e-14
FAM167A	78.2901	0.807552	0.217558	3.71188	0.000205723	0.00066098
FAM227B	34.6438	0.807441	0.287045	2.81295	0.00490898	0.011909
PLXNB1	578.815	0.807012	0.106564	7.573	3.64697e-14	3.62304e-13
LOC202181	95.1183	0.806945	0.189345	4.26177	2.02811e-05	7.68328e-05
ZNF844	160.157	0.806375	0.155476	5.18651	2.14271e-07	1.07462e-06
ABCC2	7966.32	0.806359	0.0638537	12.6282	1.4756e-36	5.42158e-35
ACO2	8280.28	0.806305	0.0641373	12.5715	3.02771e-36	1.09504e-34
ZNF449	1070.79	0.804826	0.207216	3.884	0.000102753	0.000349183
KANK2	1630.66	0.804606	0.0766281	10.5001	8.62548e-26	1.91976e-24
ASRGL1	232.53	0.804214	0.140194	5.73645	9.66798e-09	5.73811e-08
MMP24-AS1	918.947	0.804003	0.100121	8.0303	9.72362e-16	1.11265e-14
MARC2	75.4862	0.803323	0.21607	3.71789	0.000200895	0.000646494
UBAC2-AS1	62.8292	0.803161	0.221553	3.62515	0.000288794	0.000900564
AFF3	692.83	0.802412	0.0908163	8.83555	9.96057e-19	1.41571e-17
GM2A	6493.5	0.802333	0.186692	4.29762	1.72638e-05	6.61133e-05
OSBPL1A	4026.52	0.802093	0.06428	12.4781	9.82949e-36	3.4927e-34
ACSF2	369.595	0.802012	0.112055	7.15732	8.22719e-13	7.32446e-12
JPH3	55.4962	0.801925	0.239817	3.34391	0.000826078	0.00236025
ARHGEF10L	176.829	0.800677	0.156346	5.12118	3.03625e-07	1.49306e-06
IFT80	1445.44	0.800446	0.0855189	9.35986	7.98393e-21	1.30014e-19
PDZD7	57.7876	0.800442	0.246644	3.24533	0.00117315	0.00324876
ADCY5	32.3313	0.800366	0.288739	2.77194	0.00557233	0.0133371
RAB32	1613.68	0.800248	0.0789624	10.1345	3.88214e-24	7.83341e-23
PAN2	2312.87	0.799836	0.0656802	12.1777	4.08528e-34	1.35921e-32
KREMEN2	76.2086	0.799818	0.209339	3.82069	0.000133076	0.000442487
TRIM66	564.835	0.799079	0.102687	7.78172	7.15463e-15	7.59178e-14
TLE1	792.98	0.798294	0.0896963	8.89996	5.58646e-19	8.14006e-18
PCDHB11	39.1053	0.797077	0.26882	2.9651	0.00302588	0.00770159
TMEM129	713.47	0.795345	0.104845	7.58593	3.30105e-14	3.29353e-13
CYP26B1	147.594	0.794899	0.170054	4.67439	2.94824e-06	1.26813e-05
PPFIBP2	1293.02	0.794054	0.0824003	9.63654	5.60428e-22	9.96775e-21
ROPN1B	93.8824	0.793971	0.201331	3.94361	8.02627e-05	0.000277114
PDK3	2771.94	0.792978	0.0776938	10.2065	1.85517e-24	3.7858e-23
SENP7	1234.73	0.792832	0.0896083	8.84775	8.93029e-19	1.27794e-17
RBMS3	246.138	0.792042	0.137562	5.75772	8.52574e-09	5.08625e-08
DNM1	111.007	0.79182	0.187338	4.2267	2.37143e-05	8.87397e-05
ENDOG	159.531	0.790907	0.157954	5.00719	5.52308e-07	2.62821e-06
PDCD7	1889.39	0.790276	0.0809789	9.75904	1.68748e-22	3.08953e-21
ZNF181	580.796	0.790004	0.112667	7.01183	2.35225e-12	1.99635e-11
RIC3	280.912	0.789938	0.150337	5.25443	1.4848e-07	7.60615e-07
FAXDC2	989.688	0.789632	0.0845118	9.34345	9.32486e-21	1.51091e-19
THNSL2	60.6122	0.789183	0.223867	3.52523	0.000423112	0.00128048
DNM3	42.2222	0.788603	0.262008	3.00985	0.00261379	0.00675673
PCDHGA7	52.3534	0.78814	0.241226	3.26723	0.00108606	0.00302726
TANGO2	1454.61	0.786816	0.0790036	9.95924	2.29817e-23	4.43301e-22
MMP25-AS1	65.3159	0.786754	0.230434	3.41423	0.000639632	0.00186704
LINC00648	130.79	0.786751	0.168735	4.66264	3.12176e-06	1.33461e-05
GPNMB	48594.9	0.785747	0.0615541	12.7651	2.56664e-37	9.76227e-36
CYP27A1	2455.77	0.785001	0.0760088	10.3278	5.27721e-25	1.12361e-23
MIPEPP3	61.9949	0.783981	0.223203	3.51241	0.000444063	0.00133838
JDP2	105.121	0.783688	0.185203	4.23151	2.32132e-05	8.70054e-05
HOXB8	39.1931	0.78287	0.266532	2.93725	0.00331141	0.00834964
MYO5A	19040.6	0.782531	0.0776009	10.084	6.49978e-24	1.29381e-22
ZSCAN31	74.6228	0.782456	0.213005	3.67342	0.000239324	0.000759453
MURC	83.2707	0.782443	0.199712	3.91785	8.93408e-05	0.00030585
ARHGAP24	354.297	0.782367	0.11535	6.78256	1.18068e-11	9.43321e-11
PINK1	1059.54	0.782043	0.0815712	9.58725	9.04658e-22	1.58467e-20
HERC1	6276.78	0.781208	0.0638865	12.2281	2.20135e-34	7.44646e-33
HADHB	5435.69	0.780967	0.0659605	11.8399	2.42683e-32	7.39135e-31
TLCD2	407.662	0.780747	0.110398	7.07208	1.52628e-12	1.31895e-11
HIBADH	3836.22	0.77837	0.0644055	12.0855	1.26071e-33	4.04499e-32
DHRS4	340.748	0.775948	0.116332	6.67012	2.55587e-11	1.96455e-10
GAREM	1335.55	0.775932	0.0867226	8.94728	3.64336e-19	5.37155e-18
AMZ2P1	561.618	0.774476	0.0990543	7.81871	5.33692e-15	5.72677e-14
RGS20	1030.12	0.774361	0.0952281	8.13164	4.2353e-16	4.98363e-15
LOC100129461	60.5667	0.774097	0.246406	3.14155	0.00168059	0.00452711
NBPF1	326.779	0.774089	0.122066	6.34157	2.27431e-10	1.59182e-09
LINC00858	38.3819	0.773967	0.266756	2.9014	0.00371499	0.00926203
NAV2	21037.9	0.773888	0.0792583	9.76413	1.6049e-22	2.94498e-21
HCFC2	965.943	0.773857	0.105639	7.32546	2.38086e-13	2.21962e-12
ZNRD1-AS1	43.3824	0.772822	0.255647	3.02301	0.00250278	0.00649255
NPTN-IT1	137.85	0.772448	0.181215	4.2626	2.02064e-05	7.65679e-05
GRK4	34.2232	0.77142	0.28139	2.74146	0.00611667	0.0144917
SETDB2	2784.42	0.770773	0.0718671	10.725	7.77052e-27	1.85702e-25
SDHAP1	174.394	0.770417	0.146477	5.25963	1.44342e-07	7.4247e-07
FAHD1	1400.6	0.770196	0.0772648	9.96826	2.09878e-23	4.05322e-22
ZNF396	49.6286	0.769787	0.257889	2.98496	0.00283616	0.00726322
FZD7	717.651	0.769568	0.0871147	8.83396	1.01033e-18	1.43474e-17
LOC101929767	37.0516	0.768866	0.274016	2.80592	0.00501733	0.012141
DLX6-AS1	56.9429	0.768667	0.230795	3.33052	0.000866828	0.00246235
NUDT14	266.796	0.768667	0.12359	6.21949	4.98782e-10	3.37725e-09
NPC2	4108.91	0.768128	0.0730241	10.5188	7.07444e-26	1.58544e-24
MYCBP2	8030.65	0.768096	0.0912027	8.42185	3.70583e-17	4.6984e-16
PAIP2B	160.639	0.766909	0.156832	4.89001	1.0083e-06	4.62947e-06
C2	198.597	0.766895	0.154753	4.95562	7.21017e-07	3.37454e-06
METTL7A	85.0291	0.7667	0.205686	3.72753	0.000193369	0.000624011
NDUFB1	939.019	0.765063	0.0814631	9.39153	5.91375e-21	9.69843e-20
ZNF250	162.185	0.764794	0.156215	4.89578	9.79148e-07	4.50586e-06
LINC00323	37.2358	0.763868	0.278801	2.73983	0.00614703	0.0145529
ZSCAN30	107.491	0.762307	0.183299	4.15881	3.19907e-05	0.000116982
TMCC2	2291.9	0.761949	0.0694365	10.9733	5.13546e-28	1.28609e-26
TRAK2	8674.75	0.761745	0.0721422	10.5589	4.61887e-26	1.06005e-24
BTBD10	3001.28	0.761675	0.0724555	10.5123	7.58111e-26	1.69664e-24
FNDC4	40.2991	0.761666	0.265148	2.8726	0.00407107	0.0100654
COL6A1	899.581	0.76133	0.086073	8.84517	9.1393e-19	1.30586e-17
PCAT6	47.9064	0.760538	0.248971	3.05473	0.00225264	0.00590321
PGM2L1	387.48	0.759559	0.135951	5.58702	2.31e-08	1.3087e-07
DKK2	75.461	0.759223	0.241353	3.1457	0.00165691	0.00447076
PLEKHM1P	182.463	0.759026	0.146833	5.16932	2.34951e-07	1.17244e-06
GAA	3886.01	0.758721	0.0772625	9.82005	9.2298e-23	1.71897e-21
CBFA2T2	1525.68	0.758344	0.0738109	10.2742	9.21497e-25	1.92658e-23
HELZ2	1306.69	0.758191	0.0889579	8.52304	1.55422e-17	2.03174e-16
RAB40B	55.5398	0.758058	0.242851	3.1215	0.00179934	0.00481181
RRAGD	4134.44	0.757204	0.0626832	12.0799	1.34963e-33	4.32173e-32
SIRT5	593.599	0.756866	0.101292	7.47213	7.89084e-14	7.63315e-13
UTRN	2888.31	0.756548	0.085159	8.88394	6.45351e-19	9.34462e-18
VPS13C	3723.63	0.756543	0.0956815	7.90689	2.639e-15	2.91279e-14
CCDC24	74.926	0.7557	0.209025	3.61535	0.000299943	0.000933217
LINC01000	2702.04	0.754915	0.067427	11.196	4.26384e-29	1.11972e-27
RASSF8-AS1	133.89	0.754677	0.173317	4.35431	1.33484e-05	5.22299e-05
TUBBP5	93.2398	0.752925	0.191815	3.92527	8.66326e-05	0.000297522
ROPN1	200.495	0.752508	0.153278	4.90944	9.13365e-07	4.21751e-06
CCDC176	35.9079	0.75149	0.277884	2.70433	0.00684423	0.0160488
MCOLN1	1037.7	0.751221	0.0860065	8.73447	2.44798e-18	3.39014e-17
EIF4A3	7444.93	0.751028	0.0655371	11.4596	2.10536e-30	5.91214e-29
LINC01061	103.743	0.751022	0.185778	4.04257	5.28695e-05	0.000187081
SLC40A1	114.997	0.750844	0.18657	4.02446	5.71072e-05	0.00020111
TIMP2	36391.5	0.750254	0.0781217	9.60365	7.71594e-22	1.35745e-20
USP49	218.405	0.74976	0.148511	5.0485	4.45295e-07	2.14608e-06
TPPP	1191.51	0.749423	0.091136	8.22313	1.98252e-16	2.4026e-15
MAN2B2	1378.66	0.749412	0.0791773	9.46499	2.93599e-21	4.91444e-20
GUSBP11	413.992	0.748841	0.120337	6.22289	4.88082e-10	3.30757e-09
HMGCL	596.485	0.748329	0.094914	7.88428	3.16349e-15	3.47276e-14
TMEM161B-AS1	75.7338	0.748303	0.213914	3.49816	0.000468483	0.00140493
LINC01443	37.1774	0.748084	0.274847	2.72182	0.00649234	0.0152967
ATG14	1776.99	0.747538	0.083472	8.95555	3.38031e-19	4.99966e-18
ADAM11	1190.14	0.746886	0.103371	7.2253	5.00013e-13	4.54131e-12
ITGB7	290.552	0.746481	0.124188	6.01091	1.84488e-09	1.17318e-08
RALGPS1	147.839	0.746159	0.156421	4.77018	1.84059e-06	8.15283e-06
SH3YL1	491.079	0.745974	0.103645	7.19737	6.13829e-13	5.52856e-12
WDR72	447.202	0.745209	0.115639	6.44427	1.16157e-10	8.37227e-10
NUDT7	58.1624	0.744348	0.249737	2.98053	0.00287748	0.00735507
SERPINH1	84.7145	0.743793	0.196162	3.79173	0.000149603	0.000491887
ACAD10	1266.23	0.743082	0.0801891	9.26662	1.92133e-20	3.07014e-19
MAP3K3	946.682	0.742895	0.0845854	8.78278	1.59481e-18	2.23729e-17
CEP89	301.69	0.742796	0.117792	6.30599	2.86364e-10	1.98204e-09
IFFO1	608.324	0.742664	0.103142	7.20041	6.00336e-13	5.41305e-12
ZFP14	262.796	0.742264	0.143379	5.17693	2.25568e-07	1.12944e-06
SH3BP4	8479.52	0.742155	0.0783121	9.47688	2.61999e-21	4.40828e-20
SMIM4	340.94	0.7419	0.134679	5.50867	3.61563e-08	1.99878e-07
LIMCH1	2302.59	0.741037	0.0760514	9.7439	1.95889e-22	3.58238e-21
AHCYL2	2326.4	0.740654	0.0696302	10.637	2.0057e-26	4.69629e-25
CLK1	1608.58	0.740401	0.0767335	9.649	4.96398e-22	8.87647e-21
RRN3P3	159.147	0.740207	0.153668	4.81694	1.45777e-06	6.54843e-06
PCDHB14	82.037	0.739735	0.210841	3.5085	0.000450638	0.00135669
ANP32A-IT1	66.2029	0.739612	0.226765	3.26157	0.00110796	0.00308245
HIST1H1C	293.966	0.739592	0.137467	5.38016	7.44209e-08	3.9823e-07
MUT	1611.61	0.739036	0.0776063	9.52288	1.68443e-21	2.87899e-20
NAGK	1161.19	0.738881	0.0852922	8.66294	4.59759e-18	6.22345e-17
KIAA1109	3172.8	0.738518	0.0939177	7.86346	3.73674e-15	4.06898e-14
LAMA3	70.7664	0.738094	0.217486	3.39376	0.000689396	0.00199862
ACBD7	52.7049	0.737893	0.250014	2.95141	0.0031633	0.00801235
POLI	426.135	0.73721	0.112191	6.571	4.99772e-11	3.72484e-10
PSMG3-AS1	373.375	0.737139	0.109572	6.72745	1.72662e-11	1.35676e-10
MTMR11	137.969	0.736337	0.176814	4.16448	3.12065e-05	0.000114424
DCDC2	259.941	0.736002	0.132802	5.5421	2.98857e-08	1.66806e-07
AK1	954.65	0.735653	0.08612	8.54219	1.31704e-17	1.72933e-16
FAM229B	86.6323	0.733959	0.193642	3.79029	0.000150473	0.000494247
LINC01291	161.859	0.733676	0.167421	4.38222	1.17474e-05	4.63349e-05
RCBTB1	2713.85	0.733542	0.0714139	10.2717	9.4518e-25	1.97101e-23
ETFDH	1049.4	0.733258	0.0827327	8.86298	7.79013e-19	1.12399e-17
C4orf3	1204.74	0.732401	0.0854957	8.56653	1.06654e-17	1.4084e-16
INSIG1	3299.4	0.732372	0.0791568	9.25217	2.19981e-20	3.50132e-19
TMEM44-AS1	44.6555	0.732357	0.259557	2.82156	0.00477907	0.0116374
ZNF425	85.0548	0.732081	0.200512	3.65105	0.000261168	0.000823128
COL4A3BP	3070.43	0.73181	0.0877298	8.34163	7.32725e-17	9.13257e-16
CAB39L	800.386	0.731508	0.0898478	8.14164	3.89974e-16	4.60215e-15
STAT2	2897.31	0.731403	0.0611246	11.9658	5.37029e-33	1.67659e-31
ARHGAP31	3744.9	0.731151	0.069302	10.5502	5.06794e-26	1.15819e-24
ERMAP	53.7704	0.731141	0.237681	3.07614	0.00209701	0.00554017
NNT-AS1	921.145	0.729958	0.0869963	8.39068	4.83342e-17	6.07572e-16
ZNF571	86.0401	0.729314	0.22334	3.2655	0.00109273	0.00304479
KIAA1024	432.631	0.729222	0.247151	2.95051	0.00317251	0.00803317
DLK1	124.11	0.729009	0.20003	3.6445	0.000267908	0.000842243
ILVBL	980.648	0.728761	0.0929909	7.83691	4.61779e-15	4.9948e-14
HAS2-AS1	90.7354	0.728382	0.196969	3.69795	0.000217347	0.000695982
LENG8-AS1	99.3303	0.728221	0.203969	3.57025	0.000356635	0.00109546
SDCBP2-AS1	105.521	0.728112	0.183085	3.9769	6.98194e-05	0.000242817
FAM186B	34.8818	0.727963	0.278367	2.61512	0.00891958	0.020304
SCD	108494	0.727003	0.0673915	10.7878	3.9323e-27	9.49553e-26
LINC00667	879.241	0.726381	0.0992218	7.32078	2.46526e-13	2.29435e-12
CTNS	1497.15	0.724697	0.0802944	9.0255	1.78882e-19	2.6937e-18
METRNL	536.682	0.723897	0.101447	7.13571	9.62876e-13	8.48829e-12
MAFIP	141.996	0.723728	0.160308	4.51462	6.3431e-06	2.58754e-05
METTL25	104.292	0.723567	0.183219	3.94919	7.8417e-05	0.000271204
HEXA	769.926	0.723232	0.0877574	8.24127	1.70393e-16	2.07585e-15
CLHC1	219.689	0.723232	0.139057	5.20098	1.98241e-07	9.98785e-07
AHCYL1	6794.34	0.723219	0.0566062	12.7763	2.22379e-37	8.49814e-36
HLA-H	74.2392	0.72295	0.215602	3.35317	0.000798926	0.00228872
ZFAND2B	224.142	0.722694	0.130955	5.51866	3.41585e-08	1.8922e-07
ADI1	2126.58	0.722591	0.0754574	9.57614	1.00742e-21	1.75708e-20
ZBED5-AS1	132.749	0.722243	0.170136	4.2451	2.185e-05	8.22573e-05
RETSAT	3538.09	0.720897	0.0868877	8.29688	1.06877e-16	1.32092e-15
CDKL5	353.679	0.720344	0.122197	5.89491	3.74876e-09	2.32369e-08
LOC101928068	58.7876	0.719205	0.243909	2.94866	0.00319158	0.00807767
CAV2	1343.62	0.719043	0.087292	8.23721	1.76267e-16	2.14257e-15
NCOA4	6450.62	0.718768	0.0634309	11.3315	9.16222e-30	2.50769e-28
COX7B	4636.57	0.718401	0.0599248	11.9884	4.08845e-33	1.28382e-31
WDR19	1211.93	0.717603	0.0891887	8.0459	8.5616e-16	9.84554e-15
NEB	140.85	0.717477	0.16862	4.255	2.09052e-05	7.89757e-05
VAMP2	538.787	0.717226	0.106648	6.72519	1.75368e-11	1.37469e-10
LOC102724814	142.662	0.716828	0.165404	4.3338	1.46557e-05	5.68103e-05
TRPM4	186.533	0.716432	0.143465	4.99376	5.92151e-07	2.80544e-06
GPAM	2062.71	0.716392	0.0862057	8.31026	9.54912e-17	1.18381e-15
LINC01024	40.3369	0.716388	0.266351	2.68964	0.00715285	0.0166855
LOC101927204	118.645	0.71636	0.172656	4.14905	3.33852e-05	0.000121696
RANBP10	1234.31	0.716333	0.0839434	8.53352	1.41962e-17	1.86101e-16
MXD1	229.094	0.715404	0.133581	5.35558	8.52846e-08	4.52923e-07
LPIN1	2671.35	0.715043	0.0723431	9.88404	4.88223e-23	9.24144e-22
TRPV1	68.274	0.714959	0.220519	3.24216	0.00118627	0.00328174
RAP1GAP	182.808	0.71398	0.146768	4.86469	1.14637e-06	5.21904e-06
ELMOD1	68.1076	0.713752	0.228781	3.1198	0.00180974	0.00483801
NOL3	216.707	0.71353	0.151641	4.7054	2.53373e-06	1.10064e-05
ACADSB	1517.28	0.713054	0.084689	8.41968	3.77518e-17	4.77885e-16
RGAG1	37.7041	0.712785	0.277769	2.5661	0.0102848	0.023065
ARMCX3	4295.62	0.712776	0.0785625	9.07273	1.16072e-19	1.76592e-18
APBB3	371.431	0.712052	0.111416	6.39091	1.649e-10	1.17188e-09
JHDM1D-AS1	144.934	0.711862	0.166492	4.27565	1.90578e-05	7.25207e-05
MAMDC4	141.392	0.711515	0.169112	4.20736	2.58367e-05	9.61668e-05
ZBTB3	106.842	0.711413	0.179964	3.95308	7.71529e-05	0.00026706
CCDC144B	255.436	0.71127	0.154369	4.60761	4.07329e-06	1.71072e-05
GSTK1	2297.75	0.710943	0.0666965	10.6594	1.57644e-26	3.71265e-25
CAMK2N1	351.613	0.710497	0.116792	6.08342	1.17647e-09	7.65248e-09
LINC00673	1434.96	0.709554	0.0805732	8.80632	1.29321e-18	1.81891e-17
RAG1	37.1483	0.709455	0.27889	2.54385	0.0109638	0.0243952
CLDN14	239.548	0.709413	0.131467	5.39611	6.81001e-08	3.65494e-07
PCDHB2	103.337	0.709324	0.184814	3.83805	0.000124015	0.000415598
EVC	1654.07	0.709126	0.0855404	8.28995	1.13293e-16	1.39703e-15
LRRC27	66.2109	0.709066	0.225558	3.14361	0.00166877	0.00449677
VAT1	17611.6	0.707749	0.0702896	10.069	7.57133e-24	1.50341e-22
TMOD2	1161.23	0.706321	0.0759061	9.3052	1.3374e-20	2.14979e-19
CCDC53	926.05	0.705576	0.096085	7.34325	2.08474e-13	1.95594e-12
SLC25A35	118.533	0.704869	0.174166	4.04711	5.18542e-05	0.000183609
TMBIM4	801.73	0.703398	0.0894324	7.86513	3.68702e-15	4.01754e-14
FGFR2	117.759	0.703082	0.190313	3.69435	0.00022045	0.000704249
SERINC2	614.786	0.702838	0.108282	6.49081	8.53785e-11	6.23148e-10
BNC2	2728.61	0.702659	0.0936338	7.50433	6.17425e-14	6.03925e-13
RASAL2-AS1	38.1203	0.702639	0.268772	2.61425	0.00894228	0.02035
LRRC75B	45.8797	0.702171	0.260419	2.69631	0.00701128	0.0163883
LOC100130950	32.7964	0.701979	0.295541	2.37523	0.0175378	0.0371506
DNAJC3-AS1	143.748	0.701499	0.163075	4.30168	1.69506e-05	6.50062e-05
MPDZ	2607.93	0.701438	0.0730781	9.59847	8.114e-22	1.42439e-20
THAP8	147.299	0.700907	0.158304	4.42761	9.5283e-06	3.79423e-05
UCKL1	1953.89	0.700529	0.0711375	9.84752	7.02535e-23	1.3175e-21
PRKG1	302.56	0.700475	0.128261	5.46132	4.72617e-08	2.58274e-07
ZNF224	894.487	0.699916	0.0989739	7.07173	1.53019e-12	1.32163e-11
TRIM52	437.813	0.699613	0.11117	6.29321	3.1097e-10	2.14228e-09
PBRM1	5957.65	0.698805	0.0779414	8.96577	3.08126e-19	4.58033e-18
RBPMS	988.789	0.698644	0.0871639	8.01529	1.09876e-15	1.25199e-14
TUBGCP6	1585.22	0.698148	0.0704437	9.91072	3.73958e-23	7.12852e-22
GABARAP	4644.31	0.697474	0.0740795	9.41521	4.72128e-21	7.77428e-20
MSI2	1710.04	0.697295	0.0718192	9.70903	2.75942e-22	5.00121e-21
ADCY6	3097.09	0.696498	0.0890761	7.81913	5.31879e-15	5.71109e-14
FER	1811.12	0.696374	0.0892732	7.80049	6.1669e-15	6.57383e-14
HSPB1	4301.29	0.696222	0.165479	4.20732	2.58415e-05	9.61668e-05
DMXL1	3913.56	0.695338	0.0811453	8.56905	1.04347e-17	1.38019e-16
SH3D21	72.4722	0.695242	0.227263	3.0592	0.00221927	0.00582707
ITFG2	591.2	0.694681	0.0936492	7.4179	1.18991e-13	1.13949e-12
RAB30-AS1	149.689	0.694635	0.158217	4.39039	1.13149e-05	4.47597e-05
HOMER3	566.545	0.694106	0.0971691	7.14329	9.11251e-13	8.0639e-12
DMTF1	4295.61	0.693825	0.0767067	9.04517	1.49437e-19	2.25449e-18
STS	1416.38	0.693699	0.1012	6.85471	7.14584e-12	5.81537e-11
ZBTB37	208.883	0.692264	0.145079	4.77163	1.82739e-06	8.0988e-06
CTSA	17239	0.692248	0.0658779	10.508	7.93239e-26	1.77036e-24
FBXL2	177.207	0.690994	0.163093	4.23682	2.26706e-05	8.50697e-05
FGD6	351.608	0.690762	0.119163	5.79677	6.76033e-09	4.07657e-08
DENND1B	487.098	0.690577	0.107999	6.39427	1.61312e-10	1.14789e-09
ANKZF1	981.96	0.690212	0.0779212	8.85782	8.15964e-19	1.17312e-17
DYNC1LI2	12854.8	0.69007	0.0740621	9.31746	1.19164e-20	1.9212e-19
ADCK1	298.633	0.689993	0.119788	5.7601	8.40643e-09	5.02062e-08
ST20	234.438	0.689364	0.134213	5.13636	2.80107e-07	1.38371e-06
FEM1B	5712.47	0.689326	0.0841826	8.18846	2.64586e-16	3.18505e-15
DHRS1	79.2585	0.689024	0.204787	3.36458	0.000766603	0.0022062
FAM63B	864.645	0.688437	0.124314	5.53791	3.0611e-08	1.70502e-07
SHF	73.6357	0.688426	0.22179	3.10396	0.00190949	0.0050812
AGO4	1255.86	0.688385	0.0862068	7.98528	1.40207e-15	1.57653e-14
DHFRL1	813.586	0.68837	0.092087	7.47521	7.70801e-14	7.46967e-13
NR3C2	93.9139	0.687495	0.187323	3.67011	0.000242444	0.000768602
UBE2H	5725.22	0.687385	0.0612524	11.2222	3.17358e-29	8.44361e-28
CFAP43	49.8885	0.687385	0.247324	2.77929	0.00544776	0.0130654
LOC642361	69.9035	0.687166	0.2134	3.22008	0.00128156	0.00352389
C5orf38	107.24	0.686904	0.182892	3.75579	0.000172793	0.000562179
LOC101928307	35.876	0.686213	0.283115	2.4238	0.015359	0.0329532
MXD3	122.783	0.685498	0.173354	3.95432	7.67526e-05	0.000265731
CNPY4	792.26	0.685351	0.0857175	7.99545	1.29097e-15	1.45463e-14
BCL11A	117.363	0.685305	0.178781	3.83321	0.000126484	0.00042256
ZNF512B	2174.22	0.685237	0.0723	9.47769	2.5998e-21	4.37886e-20
RRAGC	2152.34	0.683981	0.071839	9.52103	1.71479e-21	2.92471e-20
ZSWIM8	3469.21	0.683782	0.0697534	9.80285	1.09452e-22	2.03144e-21
VPS9D1	398.987	0.683544	0.10514	6.50127	7.96422e-11	5.82067e-10
FOXO3	772.523	0.683519	0.0849898	8.04236	8.81232e-16	1.01267e-14
MAZ	5144.52	0.682632	0.0655768	10.4096	2.24047e-25	4.87934e-24
TET2	1071.18	0.682459	0.0916664	7.44503	9.69206e-14	9.30885e-13
EPHA5-AS1	72.782	0.68243	0.208062	3.27993	0.00103832	0.00290519
CDK2	30534.3	0.682158	0.069782	9.77556	1.43362e-22	2.63965e-21
GNPTG	968.562	0.681768	0.0944257	7.22015	5.19302e-13	4.70859e-12
ZEB2	10605.7	0.681384	0.0614454	11.0893	1.4145e-28	3.62072e-27
LOC642366	36.5373	0.680305	0.296958	2.29091	0.0219687	0.0451782
GGACT	82.1206	0.680064	0.200384	3.39381	0.00068928	0.00199862
ZNF84	1406.31	0.679874	0.0908878	7.48037	7.41146e-14	7.19089e-13
HOMEZ	391.308	0.679354	0.119385	5.69045	1.26704e-08	7.3875e-08
RIT1	943.598	0.679168	0.0920608	7.37739	1.61423e-13	1.52599e-12
ZNF846	59.4615	0.679163	0.231417	2.93481	0.00333755	0.00840901
FBXL8	34.5285	0.679036	0.286214	2.37247	0.0176695	0.0373904
PAQR6	85.4864	0.678957	0.206563	3.28692	0.00101288	0.00284087
SRRM3	863.634	0.678764	0.0833159	8.14686	3.73481e-16	4.41716e-15
APOBEC3F	291.055	0.678295	0.121286	5.5925	2.23821e-08	1.26981e-07
XAF1	170.475	0.677723	0.146987	4.61077	4.01183e-06	1.68728e-05
PACS2	1489.43	0.677071	0.0820766	8.24926	1.59375e-16	1.94748e-15
ALDH4A1	273.022	0.677044	0.125261	5.40507	6.47842e-08	3.48969e-07
CORO7	97.6125	0.675905	0.190282	3.55212	0.000382135	0.00116671
HDAC11	297.693	0.675063	0.130108	5.1885	2.11997e-07	1.06412e-06
SLC38A7	1704.71	0.675044	0.0826672	8.1658	3.19309e-16	3.81089e-15
ACADM	5143.82	0.67501	0.0743673	9.07671	1.11908e-19	1.70738e-18
PSMA3-AS1	1955.86	0.674872	0.0714355	9.44729	3.47701e-21	5.78418e-20
GPR158	1125.56	0.674806	0.0975863	6.91496	4.67986e-12	3.87074e-11
SLC16A10	80.3369	0.673627	0.198643	3.39115	0.000695995	0.00201415
HMGN3-AS1	101.283	0.673296	0.182733	3.68459	0.000229074	0.000729642
SNAI2	5825.92	0.673032	0.0622682	10.8086	3.13422e-27	7.60236e-26
DUSP22	1149.64	0.672451	0.075088	8.9555	3.38186e-19	4.99966e-18
ZNF780B	498.398	0.672025	0.111972	6.00171	1.95249e-09	1.23966e-08
PRKAB2	2210.06	0.671638	0.078746	8.52917	1.47399e-17	1.93073e-16
GLMP	6649.19	0.670963	0.0747366	8.9777	2.76477e-19	4.12122e-18
PBLD	73.5391	0.670594	0.213256	3.14454	0.00166346	0.00448545
ACSS1	1579.34	0.670398	0.0728661	9.20041	3.56574e-20	5.6202e-19
POLD4	298.558	0.670354	0.120988	5.54066	3.01338e-08	1.68017e-07
DPY19L2P2	475.433	0.669843	0.104367	6.41815	1.3794e-10	9.86771e-10
SDC4	788.679	0.669679	0.0887268	7.54765	4.43189e-14	4.37599e-13
ZSCAN9	310.88	0.669469	0.125855	5.31937	1.04129e-07	5.45315e-07
LYRM5	396.956	0.668894	0.117572	5.68924	1.27607e-08	7.43746e-08
SPTLC2	2038.51	0.668593	0.0767149	8.7153	2.89998e-18	3.98883e-17
ZBED3	58.9376	0.667399	0.226324	2.94887	0.0031894	0.0080734
PROM1	81.1592	0.66726	0.206262	3.23501	0.00121637	0.00335984
PXMP4	751.159	0.666781	0.0911407	7.31595	2.55563e-13	2.37573e-12
IRF9	565.534	0.666651	0.101497	6.56819	5.09307e-11	3.79416e-10
PCDHGB2	64.6742	0.664825	0.21997	3.02234	0.00250828	0.0065037
ANKRD20A12P	41.7055	0.664667	0.261676	2.54004	0.011084	0.0246255
CACFD1	85.6598	0.664463	0.205901	3.2271	0.00125053	0.00344363
DACT3	200.34	0.664285	0.142065	4.67591	2.92649e-06	1.25977e-05
PLXNA1	8026.24	0.664264	0.0627729	10.582	3.61046e-26	8.39315e-25
PMP22	2760.38	0.662672	0.075496	8.77759	1.67017e-18	2.34098e-17
IFI27L2	150.409	0.662377	0.162353	4.07987	4.50615e-05	0.000161277
SCN1A	70.9099	0.661496	0.214833	3.07912	0.00207613	0.00549038
TMEM198B	444.376	0.661427	0.103567	6.38646	1.69774e-10	1.20334e-09
TRIOBP	884.981	0.661368	0.0933472	7.08504	1.39006e-12	1.21092e-11
TEKT4P2	46.248	0.661053	0.257374	2.56845	0.0102153	0.0229505
DEPTOR	252.09	0.660685	0.145197	4.55026	5.35806e-06	2.20964e-05
PCMTD2	1613.82	0.660128	0.0822033	8.03044	9.71262e-16	1.11218e-14
LOC283922	172.912	0.659537	0.159008	4.14782	3.3565e-05	0.000122324
PIEZO2	297.275	0.659233	0.129953	5.07284	3.91917e-07	1.89899e-06
MITF	37887	0.659099	0.0644249	10.2305	1.44775e-24	2.96936e-23
RNF152	114.713	0.659001	0.178532	3.69121	0.000223186	0.000712289
FAM13B	3000.84	0.658793	0.0673894	9.77592	1.4286e-22	2.6334e-21
UQCRB	13443.8	0.658766	0.0780907	8.4359	3.28652e-17	4.17986e-16
HSD17B14	1425.24	0.658471	0.0738417	8.91734	4.77622e-19	6.9972e-18
C3orf18	244.448	0.658351	0.129621	5.07903	3.79358e-07	1.84199e-06
PLSCR4	207.691	0.657557	0.137955	4.76645	1.87505e-06	8.29639e-06
CD99L2	2225.33	0.657384	0.0740745	8.87462	7.01722e-19	1.01518e-17
SLC4A8	46.6556	0.657098	0.254006	2.58693	0.0096834	0.0218737
SLC38A8	57.8531	0.657005	0.232956	2.82029	0.00479799	0.0116694
ZNF821	135.656	0.656935	0.17139	3.83297	0.000126604	0.000422874
KLHL7-AS1	36.7095	0.656441	0.291554	2.25152	0.0243525	0.0494466
PDE4DIP	1107.79	0.656135	0.0806689	8.13368	4.16468e-16	4.90409e-15
CHKA	2125.83	0.656082	0.0958442	6.8453	7.63171e-12	6.17974e-11
LOC105274304	38.5657	0.65526	0.267225	2.45209	0.014203	0.0307375
ZDHHC11	548.186	0.655193	0.100368	6.52791	6.66932e-11	4.91643e-10
GEMIN8	251.107	0.655106	0.127055	5.15608	2.52177e-07	1.25108e-06
ACVR2B-AS1	45.8631	0.655096	0.259737	2.52216	0.0116638	0.0258287
HEMK1	663.337	0.653666	0.0892483	7.32413	2.40462e-13	2.23926e-12
RAD51-AS1	86.9128	0.653499	0.201286	3.24662	0.00116783	0.00323458
RNF130	2109.5	0.652944	0.0756882	8.62676	6.31133e-18	8.47246e-17
TPCN2	1985.92	0.652866	0.0682817	9.56137	1.16209e-21	2.01384e-20
ACAD11	53.916	0.652131	0.239503	2.72285	0.00647219	0.0152537
TRPM7	6132.75	0.651985	0.0724477	8.99938	2.26994e-19	3.4087e-18
IFT27	156.899	0.651596	0.16251	4.00957	6.08286e-05	0.000213196
GAS2L1	862.179	0.650864	0.0901704	7.21816	5.26961e-13	4.7727e-12
VPS13B	2598.35	0.650711	0.085277	7.63056	2.33736e-14	2.36701e-13
SPPL2B	372.023	0.650204	0.117956	5.51228	3.54224e-08	1.96021e-07
POU6F1	118.454	0.649285	0.185712	3.4962	0.000471935	0.0014145
IPO13	1566.38	0.649213	0.0762969	8.50903	1.75389e-17	2.27711e-16
CASD1	927.424	0.649118	0.0899789	7.21412	5.42853e-13	4.90566e-12
SRCIN1	116.527	0.649097	0.176374	3.68023	0.000233022	0.00074105
ZNF667-AS1	107.573	0.648878	0.185117	3.50523	0.000456208	0.00137142
SEMA6D	1044.2	0.64883	0.0981939	6.60764	3.90501e-11	2.94567e-10
TRANK1	1043.15	0.648707	0.0839844	7.72413	1.12618e-14	1.17498e-13
GCSHP3	131.326	0.647885	0.177034	3.65966	0.000252549	0.000797827
MORC1	109.988	0.647164	0.177329	3.64951	0.000262739	0.000827116
OBSL1	956.129	0.64707	0.0844108	7.66572	1.77829e-14	1.81789e-13
ZNF233	55.8977	0.646988	0.253416	2.55307	0.0106779	0.0238343
ZCWPW1	159.279	0.646206	0.155644	4.15183	3.29822e-05	0.000120408
HDAC6	1005.41	0.645652	0.0820765	7.86647	3.64783e-15	3.97751e-14
GIGYF1	6778.93	0.644915	0.0580137	11.1166	1.04163e-28	2.68322e-27
DVL2	2505.15	0.644767	0.0666469	9.67437	3.87475e-22	6.9836e-21
PLTP	97.2281	0.64473	0.191913	3.35949	0.000780862	0.00224133
THSD4	38.3512	0.644656	0.276576	2.33084	0.0197617	0.0413053
ANKRD9	250.816	0.644125	0.165272	3.89736	9.72478e-05	0.000331518
LOC100130744	123.277	0.643379	0.170076	3.78289	0.000155015	0.000508339
CEP126	118.944	0.643325	0.176075	3.6537	0.000258488	0.000815318
AKAP7	404.586	0.643015	0.112848	5.69805	1.21187e-08	7.08625e-08
OGDHL	1354.51	0.642353	0.0768011	8.36385	6.07042e-17	7.58943e-16
SLC26A11	852.432	0.642291	0.0919938	6.98189	2.91231e-12	2.45516e-11
SRR	104.134	0.641899	0.181465	3.53731	0.000404226	0.00122952
LHFP	895.429	0.640945	0.0907289	7.0644	1.61307e-12	1.39246e-11
BTN2A3P	181.863	0.640775	0.14751	4.34395	1.39943e-05	5.45373e-05
SWT1	451.007	0.640442	0.116849	5.48095	4.23043e-08	2.32358e-07
CNTNAP4	160.687	0.640354	0.151783	4.21887	2.45526e-05	9.16648e-05
PSMB10	269.212	0.639931	0.137317	4.66025	3.15831e-06	1.34917e-05
CEP112	642.612	0.639158	0.0915635	6.98049	2.94153e-12	2.4785e-11
CERS1	254.308	0.63902	0.127102	5.02762	4.96614e-07	2.37364e-06
RILPL1	501.029	0.638262	0.101873	6.26526	3.72193e-10	2.54565e-09
MAN2B1	1376.67	0.637978	0.0793593	8.03911	9.04922e-16	1.03842e-14
SGSH	1562.01	0.637968	0.0936388	6.81306	9.55411e-12	7.69792e-11
ZNF106	22633.8	0.637732	0.0630629	10.1126	4.85615e-24	9.77444e-23
DNAJB4	838.215	0.637564	0.11335	5.62474	1.85787e-08	1.06371e-07
JMY	932.424	0.63741	0.0862061	7.39402	1.4245e-13	1.35453e-12
FAM76A	288.931	0.637378	0.121463	5.24752	1.54162e-07	7.88472e-07
IRS2	7341.35	0.637309	0.178046	3.57946	0.000344306	0.00106101
RGS7	47.9747	0.635941	0.259387	2.45171	0.0142179	0.0307656
COX6A1	1165.99	0.635836	0.0789742	8.05118	8.19983e-16	9.4631e-15
ABR	4201.66	0.635583	0.0632078	10.0554	8.69237e-24	1.71759e-22
CPEB1	536.563	0.635043	0.100855	6.29662	3.04208e-10	2.09837e-09
MRPL34	1310.84	0.634975	0.104227	6.09222	1.11359e-09	7.25803e-09
JADE2	2389.3	0.634752	0.0927045	6.84705	7.53906e-12	6.11082e-11
APC2	323.587	0.634746	0.125257	5.06754	4.02981e-07	1.95027e-06
CIDECP	162.112	0.634652	0.151947	4.1768	2.9564e-05	0.00010882
MED15	8452.52	0.634381	0.0673482	9.41943	4.53551e-21	7.48359e-20
FAM195B	1218.75	0.633715	0.0872173	7.26594	3.70464e-13	3.39515e-12
RPS6KA2	84.5172	0.633257	0.202059	3.13401	0.00172433	0.00463416
FRMD4A	646.736	0.633062	0.114656	5.52139	3.36327e-08	1.86563e-07
FNIP2	1456.26	0.631822	0.0748102	8.44567	3.02295e-17	3.86284e-16
PRIMA1	147.609	0.631639	0.171437	3.68438	0.000229264	0.000730104
TMEM132A	774.26	0.631503	0.104116	6.06536	1.3166e-09	8.51273e-09
MAGEH1	742.195	0.630761	0.085495	7.37776	1.6098e-13	1.52268e-12
PTN	246.05	0.630681	0.131987	4.77837	1.76725e-06	7.85589e-06
PHYKPL	268.68	0.629152	0.124192	5.06597	4.06318e-07	1.96524e-06
PIGM	618.857	0.628635	0.0952951	6.59671	4.20376e-11	3.16219e-10
LOC283788	437.969	0.627873	0.109513	5.73329	9.84984e-09	5.84076e-08
BMF	933.963	0.62744	0.0941784	6.66225	2.69674e-11	2.06891e-10
C11orf63	262.408	0.626827	0.122556	5.1146	3.14403e-07	1.54185e-06
C4orf33	359.494	0.626388	0.121166	5.16968	2.34498e-07	1.17054e-06
USP20	553.515	0.625898	0.0968799	6.46055	1.04321e-10	7.54938e-10
RFPL2	129.433	0.625566	0.210012	2.97871	0.00289463	0.00739309
PTPRS	5136.75	0.62544	0.0592834	10.55	5.07961e-26	1.15922e-24
SUOX	796.985	0.624757	0.0865279	7.22029	5.18755e-13	4.70627e-12
TBXAS1	41.189	0.624221	0.265412	2.3519	0.018678	0.0392643
LCA5	171.05	0.623381	0.162964	3.82526	0.000130634	0.000435348
PCDHB13	84.4859	0.623095	0.20999	2.96726	0.00300464	0.00765233
IGIP	90.5669	0.623064	0.19916	3.12845	0.00175729	0.00471179
TYR	19648.8	0.622254	0.0857372	7.25769	3.93749e-13	3.60243e-12
LOC101927151	285.842	0.62213	0.120944	5.14394	2.69031e-07	1.33103e-06
JAK2	1360.6	0.622028	0.186038	3.34355	0.000827149	0.00236222
CDIP1	348.363	0.621807	0.11751	5.29151	1.21313e-07	6.29807e-07
BACE1	705.181	0.621276	0.0859557	7.22787	4.90629e-13	4.46109e-12
MGST3	1605.54	0.621254	0.0767239	8.09726	5.62103e-16	6.57125e-15
NBPF10	159.277	0.621099	0.155693	3.98925	6.62827e-05	0.000231013
DNAJC4	329.329	0.620457	0.113129	5.48452	4.14601e-08	2.27953e-07
GREB1	5442.36	0.620174	0.0624358	9.93298	2.99187e-23	5.73696e-22
ABLIM3	54.1403	0.619199	0.235595	2.62823	0.00858295	0.0195983
TRIM2	11513.9	0.618607	0.0681293	9.07989	1.08682e-19	1.65974e-18
ABCA3	190.405	0.61843	0.153631	4.02541	5.68756e-05	0.000200425
TCEA2	87.8123	0.618335	0.194975	3.17135	0.00151731	0.00412017
DLGAP3	70.755	0.618158	0.210673	2.9342	0.00334407	0.00842152
ZNF555	165.987	0.618149	0.155022	3.9875	6.67729e-05	0.000232671
TRIQK	977.098	0.617977	0.0997847	6.1931	5.89914e-10	3.95956e-09
TPI1P2	56.5217	0.616643	0.247453	2.49195	0.0127043	0.0278097
TOLLIP	2099.98	0.616519	0.0783215	7.87164	3.50028e-15	3.82692e-14
OTOGL	147.192	0.616494	0.163272	3.77586	0.000159457	0.00052238
INPP1	345.605	0.616215	0.118078	5.2187	1.80181e-07	9.13763e-07
COQ4	304.432	0.616192	0.137911	4.46804	7.89391e-06	3.17855e-05
KCTD2	1352.13	0.616092	0.0849209	7.25489	4.01979e-13	3.67358e-12
KIAA1841	565.245	0.615565	0.0981946	6.26883	3.63781e-10	2.49338e-09
AP5Z1	1958.41	0.615186	0.0773624	7.952	1.8352e-15	2.05074e-14
MYADM	1617.06	0.6146	0.105625	5.81873	5.92979e-09	3.60662e-08
MICAL2	182.439	0.614414	0.166695	3.68587	0.000227925	0.000726409
HCCAT5	226.885	0.614404	0.138011	4.45185	8.51327e-06	3.41437e-05
CTGF	628.467	0.614	0.097593	6.29143	3.14546e-10	2.16324e-09
BLCAP	1578.74	0.613643	0.0752377	8.15606	3.46123e-16	4.10859e-15
SPATA7	178.083	0.613264	0.15081	4.06647	4.77306e-05	0.000170011
TRIM3	659.396	0.612732	0.0885656	6.9184	4.56784e-12	3.78002e-11
ARMCX1	684.903	0.611944	0.0898173	6.81321	9.54432e-12	7.69386e-11
UCK1	1947.4	0.61145	0.0702789	8.70033	3.30934e-18	4.525e-17
PDPR	2311.07	0.610471	0.0767115	7.95801	1.74829e-15	1.95632e-14
SLC19A2	4161.72	0.61047	0.0791928	7.70866	1.27145e-14	1.3189e-13
ZNF490	242.057	0.60967	0.127969	4.76419	1.89612e-06	8.38505e-06
CHSY3	182.75	0.609347	0.150098	4.05967	4.91425e-05	0.000174503
ZNF823	109.84	0.609305	0.189384	3.2173	0.00129403	0.00355377
SGSM3	1609.86	0.609113	0.0747126	8.15274	3.55756e-16	4.21676e-15
PARVA	1148.93	0.608692	0.0837553	7.2675	3.66201e-13	3.35989e-12
NATD1	390.399	0.608144	0.116172	5.23487	1.65103e-07	8.41509e-07
BAHCC1	7120.41	0.607954	0.0867048	7.01177	2.35329e-12	1.99635e-11
IL11RA	342.87	0.607838	0.117798	5.16002	2.46923e-07	1.22689e-06
SDR39U1	564.51	0.607768	0.101488	5.98857	2.11696e-09	1.33989e-08
FAM167B	481.634	0.607581	0.0990356	6.13498	8.51683e-10	5.61425e-09
C6orf1	610.337	0.607432	0.104765	5.79805	6.70906e-09	4.04868e-08
KLF13	955.269	0.606677	0.0836217	7.25502	4.01607e-13	3.67226e-12
PIGQ	834.121	0.606395	0.089186	6.79922	1.05188e-11	8.44576e-11
SH3BP5L	925.545	0.606291	0.0817112	7.41992	1.17188e-13	1.12288e-12
DENND5B	1716.05	0.60592	0.0710924	8.52299	1.55487e-17	2.03174e-16
PROX1	64.4825	0.604836	0.24603	2.45838	0.0139564	0.0302846
EFNB3	211.191	0.604628	0.136613	4.42585	9.60648e-06	3.82348e-05
NOX5	69.302	0.604318	0.22616	2.67209	0.00753807	0.0174834
EOMES	272.543	0.604256	0.121929	4.9558	7.2034e-07	3.37331e-06
IGSF3	3138.46	0.604024	0.0654334	9.23112	2.67813e-20	4.25013e-19
MROH8	41.8272	0.602983	0.257731	2.33959	0.0193051	0.0404449
B3GNT9	66.5767	0.602693	0.221827	2.71695	0.00658872	0.0155032
WDPCP	335.527	0.602366	0.115564	5.21242	1.86393e-07	9.43198e-07
HOXB3	86.4901	0.602328	0.194573	3.09564	0.00196391	0.00521575
PTPRM	4005.44	0.602129	0.0601824	10.0051	1.44791e-23	2.81639e-22
FAM131A	259.399	0.602061	0.127798	4.71102	2.46483e-06	1.07244e-05
CXorf23	806.089	0.600919	0.0940723	6.38785	1.68239e-10	1.19403e-09
ENTPD5	531.144	0.600623	0.0969591	6.1946	5.84315e-10	3.92686e-09
THUMPD3-AS1	232.912	0.600588	0.132732	4.52483	6.04427e-06	2.47436e-05
MORN1	226.84	0.600402	0.143645	4.17976	2.91814e-05	0.000107534
ZNF674	115.806	0.600131	0.189667	3.16413	0.00155548	0.00421799
ANK3	131.891	0.599838	0.18219	3.29238	0.000993445	0.00279071
ILDR2	107.278	0.599467	0.192379	3.11607	0.00183277	0.00489292
DPP7	3811.02	0.599236	0.0779218	7.69022	1.4688e-14	1.51876e-13
MCCC1	1214.27	0.598621	0.0769535	7.77901	7.30956e-15	7.74097e-14
ZZEF1	3444.04	0.598612	0.0638887	9.3696	7.28062e-21	1.18799e-19
TRAK1	3160.03	0.598463	0.0626437	9.55344	1.25457e-21	2.17177e-20
MIR5047	908.037	0.598367	0.113501	5.27192	1.35004e-07	6.97092e-07
PRAF2	414.368	0.598333	0.115704	5.17122	2.32565e-07	1.16197e-06
NUTM2B-AS1	357.852	0.598292	0.109656	5.45607	4.86788e-08	2.65659e-07
PCDHA11	72.4821	0.598214	0.214266	2.79192	0.00523958	0.0126128
GYS1	2979.73	0.598006	0.0762137	7.84644	4.28029e-15	4.63903e-14
ZNF433	67.1112	0.598006	0.217435	2.75027	0.00595462	0.014147
EFHC1	640.714	0.59785	0.104006	5.74824	9.01776e-09	5.37187e-08
ZNF547	48.5276	0.597531	0.249338	2.39647	0.0165538	0.0352506
RAB30	495.13	0.59738	0.129405	4.61637	3.90502e-06	1.64859e-05
MAP7	1714.55	0.597322	0.0774259	7.71476	1.21208e-14	1.26217e-13
SEPT8	1683.18	0.596516	0.0694534	8.58873	8.79385e-18	1.16888e-16
NHLRC3	1348.14	0.596329	0.0792233	7.52719	5.18431e-14	5.09408e-13
THAP7-AS1	71.4211	0.595136	0.211227	2.81752	0.00483966	0.0117567
FBXO2	50.4216	0.593293	0.24016	2.47041	0.0134959	0.0293876
CRY1	1109.7	0.592978	0.0892151	6.64661	2.99926e-11	2.29231e-10
RASSF4	139.137	0.592008	0.159131	3.72026	0.000199019	0.000640838
TRAPPC9	627.19	0.591982	0.101853	5.81213	6.16841e-09	3.74252e-08
LINC01355	84.1056	0.591971	0.202266	2.9267	0.0034258	0.00860993
LOC115110	582.139	0.591952	0.0933046	6.34429	2.23451e-10	1.56532e-09
KIAA0930	3628.29	0.591899	0.0639713	9.25257	2.19152e-20	3.49156e-19
ATP6V1B1	52.5515	0.591717	0.252064	2.34749	0.0189004	0.039674
IKZF4	422.352	0.591473	0.110748	5.34071	9.2583e-08	4.8848e-07
AP5M1	1430.4	0.591445	0.081323	7.27279	3.5214e-13	3.23637e-12
ABCA5	2704.1	0.591385	0.101499	5.82653	5.65927e-09	3.45375e-08
ZNF594	261.058	0.590487	0.130279	4.53246	5.83e-06	2.39171e-05
ZNF776	678.96	0.589693	0.0940257	6.27162	3.57322e-10	2.45014e-09
TTC14	2504.6	0.589222	0.0911392	6.46508	1.01247e-10	7.34336e-10
NDRG1	276.121	0.588591	0.125868	4.67624	2.92178e-06	1.25808e-05
ARHGAP23	85.9421	0.588414	0.210486	2.79551	0.00518182	0.0124868
PHF1	890.392	0.588366	0.0838169	7.01966	2.2241e-12	1.89072e-11
KANSL3	2886.62	0.588267	0.0669299	8.7893	1.50492e-18	2.11485e-17
CBR4	1598.58	0.588045	0.0756149	7.77684	7.43565e-15	7.86935e-14
C6orf203	425.944	0.587881	0.103679	5.67022	1.42613e-08	8.27637e-08
ANXA2	5238.41	0.587631	0.0616077	9.53828	1.45226e-21	2.49798e-20
LOC284581	175.933	0.587568	0.146846	4.00124	6.30113e-05	0.000220179
LRRC6	97.9243	0.587272	0.18712	3.13847	0.0016983	0.00456875
BPHL	668.079	0.587266	0.0936824	6.26869	3.64096e-10	2.49448e-09
OSGIN1	3240.63	0.587122	0.177733	3.30339	0.000955246	0.00269461
LOC101929709	76.1367	0.586824	0.218059	2.69112	0.00712118	0.0166188
CD44	26757.6	0.585978	0.0543833	10.775	4.51979e-27	1.08656e-25
TMCO4	758.488	0.585642	0.0910453	6.43242	1.25585e-10	9.01373e-10
DDX12P	543.941	0.584972	0.106431	5.49628	3.87897e-08	2.13706e-07
GALNS	1407.92	0.584317	0.0825493	7.0784	1.45827e-12	1.26558e-11
COX8A	2166.76	0.583867	0.0829823	7.03604	1.97782e-12	1.68929e-11
CCS	405.624	0.583816	0.105503	5.53365	3.13627e-08	1.74449e-07
RASL10B	84.766	0.583776	0.200473	2.91199	0.00359131	0.00898272
LOC100270804	63.2091	0.583663	0.221155	2.63916	0.00831123	0.0190557
DBP	132.455	0.583526	0.173674	3.3599	0.000779719	0.00223884
TCF7L1	582.052	0.583364	0.111331	5.23991	1.60652e-07	8.196e-07
DDT	1030.08	0.58323	0.116694	4.99795	5.79429e-07	2.74839e-06
DPM3	105.799	0.583122	0.195345	2.98508	0.002835	0.0072616
ZNF577	741.877	0.581521	0.111944	5.19475	2.04997e-07	1.0309e-06
ITM2A	619.365	0.581263	0.0932866	6.23094	4.63657e-10	3.15127e-09
TRIM52-AS1	75.1323	0.581091	0.209635	2.77193	0.00557256	0.0133371
NPIPA5	45.4823	0.580663	0.253122	2.294	0.0217904	0.0448684
ACAP3	689.744	0.580592	0.101025	5.74701	9.08346e-09	5.40703e-08
NCOA1	3048.51	0.580099	0.0635581	9.12708	7.03735e-20	1.087e-18
ZNF337-AS1	126.662	0.579947	0.172339	3.36515	0.00076501	0.00220246
PNPLA8	2421.99	0.579937	0.0673086	8.61609	6.9278e-18	9.26164e-17
ZNF564	307.128	0.579856	0.118221	4.90486	9.34955e-07	4.31106e-06
BMS1P6	49.0296	0.579536	0.248972	2.32772	0.0199271	0.0416135
RHOQ	6246.53	0.579515	0.0734726	7.8875	3.08308e-15	3.38679e-14
EBP	1281.6	0.579485	0.0753929	7.6862	1.51566e-14	1.56522e-13
ATP6V0E2-AS1	69.2858	0.579452	0.212492	2.72693	0.00639257	0.0150748
COQ10A	458.637	0.579157	0.0991516	5.84112	5.18497e-09	3.17506e-08
ZNF528	178.656	0.578999	0.156002	3.71148	0.000206047	0.000661762
LOC374443	159.875	0.578956	0.152909	3.78629	0.000152914	0.000501856
HPS5	10975.9	0.578773	0.0635217	9.11143	8.13066e-20	1.24873e-18
ACAT1	4763.95	0.578736	0.0772358	7.49311	6.72609e-14	6.53766e-13
ZNF738	167.17	0.57853	0.146961	3.93662	8.2636e-05	0.000284822
CREBRF	1213.26	0.578284	0.0793878	7.2843	3.23356e-13	2.98538e-12
NPHP1	65.87	0.577884	0.232961	2.4806	0.013116	0.0286144
HGSNAT	1737.12	0.577313	0.0732557	7.88079	3.25306e-15	3.56626e-14
SEMA7A	569.247	0.577187	0.107348	5.37681	7.58189e-08	4.05176e-07
CHD6	4641.45	0.576759	0.0658419	8.75977	1.95653e-18	2.73054e-17
PLEKHH1	12579.9	0.576227	0.0640372	8.99832	2.29189e-19	3.43848e-18
PTGR2	469.949	0.576081	0.108439	5.3125	1.08132e-07	5.64818e-07
PTPDC1	959.147	0.576061	0.0930888	6.18829	6.082e-10	4.07167e-09
EPM2AIP1	2599.18	0.575921	0.0872285	6.60245	4.04419e-11	3.0464e-10
ANKRA2	350.279	0.575884	0.129624	4.44272	8.88286e-06	3.55643e-05
SOD2	2703.26	0.575874	0.0718866	8.01087	1.13899e-15	1.29238e-14
MDM1	844.348	0.574753	0.100173	5.73758	9.60414e-09	5.7044e-08
RECQL5	909.362	0.574685	0.081436	7.05689	1.70265e-12	1.46433e-11
ATE1	1936.74	0.574241	0.0722635	7.94649	1.91865e-15	2.13956e-14
APTR	278.77	0.574127	0.12487	4.59781	4.26955e-06	1.78758e-05
NANS	2783.04	0.573968	0.0799902	7.17548	7.20555e-13	6.44325e-12
NCOR2	12141.6	0.573962	0.0602717	9.52292	1.68386e-21	2.87899e-20
DHRS4L2	45.253	0.573818	0.248738	2.30692	0.0210593	0.0435845
DALRD3	374.861	0.572637	0.114895	4.984	6.22828e-07	2.93961e-06
LOC153684	66.9396	0.572215	0.227647	2.51361	0.0119504	0.0263769
PARP3	423.127	0.57212	0.104511	5.47425	4.3938e-08	2.4076e-07
CCDC183-AS1	102.905	0.571349	0.182451	3.13152	0.00173904	0.00466905
PKIA	133.887	0.571156	0.166147	3.43766	0.000586761	0.00172484
NABP1	1522.89	0.571064	0.0902101	6.33038	2.44557e-10	1.70579e-09
PARD6G	628.693	0.5703	0.0976461	5.84048	5.20518e-09	3.18623e-08
ZFYVE1	1314.8	0.570242	0.0716972	7.95348	1.81342e-15	2.0278e-14
PPARA	1211.28	0.570188	0.0879583	6.48248	9.0229e-11	6.5648e-10
TLE2	167.59	0.570167	0.151147	3.77227	0.00016177	0.00052942
TNFRSF14	5290.51	0.569981	0.0653651	8.71996	2.78293e-18	3.83433e-17
COQ5	715.69	0.569695	0.0897833	6.34522	2.22103e-10	1.55722e-09
ZNF470	534.188	0.569615	0.108509	5.24949	1.52519e-07	7.80562e-07
ATG2B	2361.45	0.56935	0.0872465	6.52577	6.7654e-11	4.98271e-10
PGAP3	103.746	0.569072	0.183797	3.09619	0.00196023	0.00520767
ING3	925.077	0.569048	0.0871119	6.53238	6.47347e-11	4.78511e-10
PPM1L	71.8333	0.568751	0.218518	2.60277	0.00924742	0.0209707
MMP14	10187.6	0.568711	0.0738882	7.69691	1.39394e-14	1.44227e-13
TOM1	1279.29	0.567931	0.0895363	6.34302	2.253e-10	1.57759e-09
MZF1	161.863	0.56757	0.175249	3.23864	0.00120102	0.00332027
ZNF397	564.723	0.567528	0.0982683	5.7753	7.68168e-09	4.60304e-08
ZNF789	244.101	0.567247	0.13507	4.19966	2.67313e-05	9.93182e-05
CENPP	327.549	0.567022	0.12291	4.61332	3.9629e-06	1.66902e-05
WDR13	1428.26	0.566807	0.0735123	7.71037	1.25449e-14	1.30215e-13
PPP1R12B	1165.59	0.565781	0.078484	7.20886	5.64213e-13	5.09584e-12
NAPA	4538.18	0.565324	0.0751753	7.52007	5.47467e-14	5.36961e-13
EXOC6B	893.193	0.564891	0.0936807	6.02996	1.63999e-09	1.05156e-08
HERC2P9	287.603	0.5647	0.127902	4.41511	1.0096e-05	4.01142e-05
LOC101927415	46.5738	0.564592	0.248274	2.27407	0.0229619	0.0468931
ATAT1	270.092	0.563646	0.120732	4.66856	3.03325e-06	1.29986e-05
ZFP62	756.657	0.563638	0.100217	5.62416	1.86415e-08	1.06656e-07
ATP6V0D1	2827.63	0.563623	0.0711494	7.92168	2.34314e-15	2.59685e-14
ZNF814	80.5435	0.563476	0.201666	2.79411	0.0052043	0.0125353
PHF20L1	5862.54	0.563278	0.0691442	8.14642	3.74869e-16	4.43035e-15
SOX12	1505.98	0.56238	0.0792649	7.09494	1.2941e-12	1.13097e-11
ZNF441	337.853	0.56233	0.116349	4.83312	1.34411e-06	6.06477e-06
LPP	4996.62	0.562004	0.0922204	6.09414	1.10027e-09	7.17413e-09
DMAP1	400.74	0.561909	0.107359	5.2339	1.65969e-07	8.45126e-07
EMP1	984.291	0.561708	0.104617	5.36919	7.90906e-08	4.21548e-07
MX1	109.5	0.56033	0.176599	3.17289	0.0015093	0.00409909
SLC30A4	228.839	0.560302	0.138436	4.04736	5.1798e-05	0.00018345
KLHL22	635.605	0.559636	0.0978461	5.71955	1.06805e-08	6.29755e-08
SH2B1	1315.86	0.559501	0.0732712	7.63604	2.24011e-14	2.27137e-13
WDR63	74.4055	0.559312	0.216228	2.58668	0.00969059	0.0218869
NUCB1	7658.37	0.559292	0.0669756	8.35067	6.78748e-17	8.47938e-16
MYO1E	2145.17	0.559213	0.0664293	8.41818	3.82375e-17	4.83655e-16
NAPRT	439.397	0.559176	0.113413	4.93044	8.20438e-07	3.81232e-06
ATXN7L1	470.843	0.558626	0.114337	4.8858	1.03012e-06	4.72033e-06
ZFAND5	7378.62	0.558621	0.0615977	9.06886	1.20265e-19	1.82629e-18
PGBD5	79.5288	0.558297	0.210127	2.65695	0.00788522	0.0181949
SERF2	1977.4	0.558021	0.083522	6.68113	2.37114e-11	1.82689e-10
LAMA5	1341.47	0.55791	0.0763683	7.30552	2.76196e-13	2.56019e-12
IDH3A	7996.66	0.556967	0.0640223	8.69958	3.33103e-18	4.55082e-17
LRRC63	56.0071	0.556878	0.234696	2.37276	0.0176557	0.0373662
PRCD	89.9844	0.556874	0.189937	2.93188	0.00336915	0.0084794
MYLIP	1598.67	0.556866	0.0724524	7.68596	1.51848e-14	1.56713e-13
LVCAT1	188.178	0.556802	0.148071	3.76038	0.000169657	0.000552886
TWF1	7679.74	0.55668	0.067201	8.2838	1.19308e-16	1.46784e-15
MSMO1	2240.35	0.55629	0.0986952	5.63645	1.73591e-08	9.97761e-08
CKMT2-AS1	395.818	0.556014	0.108423	5.12818	2.92553e-07	1.44168e-06
FMO4	81.1931	0.555974	0.205776	2.70184	0.00689571	0.0161555
BTBD9	644.537	0.555594	0.0921734	6.02771	1.66298e-09	1.06503e-08
PNMA1	1232.61	0.555559	0.0785276	7.0747	1.49776e-12	1.29637e-11
CLK4	458.214	0.555273	0.110139	5.04158	4.61693e-07	2.21917e-06
DUSP3	5392.7	0.555096	0.064363	8.62446	6.43963e-18	8.63038e-17
LETM2	91.9155	0.554435	0.198845	2.78828	0.00529885	0.0127404
DOCK3	347.002	0.553916	0.112605	4.91911	8.69386e-07	4.02591e-06
LINC00461	55.4754	0.553906	0.240247	2.30557	0.0211348	0.0437073
DNAJB9	854.988	0.5539	0.0976249	5.67376	1.397e-08	8.11605e-08
SORT1	7643.4	0.55385	0.0667246	8.30054	1.03639e-16	1.28286e-15
MEIS1	224.795	0.553372	0.132075	4.18983	2.79162e-05	0.000103247
SBNO2	2464.01	0.553161	0.0731541	7.56158	3.98202e-14	3.94863e-13
HERC6	216.589	0.552881	0.135586	4.07771	4.54824e-05	0.000162575
HAGH	646.353	0.552632	0.100783	5.4834	4.17238e-08	2.29325e-07
CRTC3	1626.59	0.552465	0.0780979	7.07401	1.50519e-12	1.30142e-11
TMEM150A	362.474	0.551616	0.118406	4.65867	3.18266e-06	1.35743e-05
RSPH3	115.463	0.551489	0.179905	3.06544	0.0021735	0.00572078
DGKE	84.7271	0.551454	0.209019	2.63829	0.00833249	0.0190999
LPP-AS2	119.263	0.551176	0.174087	3.1661	0.00154495	0.00419101
KIAA1715	3535.78	0.551005	0.0724344	7.60695	2.80632e-14	2.81728e-13
CEP170P1	82.4423	0.550955	0.201137	2.7392	0.00615892	0.0145768
ERBB2	785.45	0.550306	0.0863988	6.36937	1.8981e-10	1.34008e-09
PDHA1	7411.26	0.549881	0.062891	8.74339	2.26211e-18	3.14618e-17
USE1	135.519	0.54903	0.16593	3.3088	0.000936958	0.00264763
ZNF438	325.968	0.54886	0.119423	4.59592	4.30849e-06	1.80202e-05
KCNS3	887.896	0.548851	0.0830539	6.60837	3.88571e-11	2.93247e-10
C16orf93	52.0082	0.548832	0.238321	2.30291	0.021284	0.0439821
TJP2	2069.69	0.548825	0.0869639	6.31095	2.77326e-10	1.9236e-09
SPATA20	1730.04	0.548778	0.0819332	6.69787	2.11483e-11	1.63955e-10
SUSD6	505.946	0.548682	0.110307	4.97413	6.55406e-07	3.08528e-06
MYO18A	3932.7	0.54781	0.0603251	9.08097	1.07613e-19	1.64496e-18
TOB1	3002.54	0.547554	0.0984826	5.5599	2.69923e-08	1.51624e-07
CCDC115	540.381	0.547066	0.0981882	5.5716	2.52407e-08	1.42401e-07
OTUD7B	6535.91	0.546744	0.0597568	9.14949	5.72012e-20	8.94625e-19
ZNF429	61.6339	0.546442	0.22885	2.38777	0.0169511	0.0360349
LOC100294145	694.96	0.546121	0.0956896	5.70721	1.14842e-08	6.73954e-08
HES6	943.122	0.545498	0.0917458	5.94575	2.75186e-09	1.72756e-08
NOP14-AS1	177.057	0.545419	0.143724	3.79491	0.000147696	0.000486308
CLCN5	3893.46	0.545143	0.0719792	7.57361	3.62983e-14	3.60823e-13
RAD9A	426.754	0.545049	0.110402	4.93697	7.93465e-07	3.69652e-06
TBC1D16	70939.2	0.544498	0.0612559	8.8889	6.17181e-19	8.94471e-18
FAM179B	1032.1	0.544443	0.093674	5.8121	6.1694e-09	3.74252e-08
YPEL5	1493.14	0.544227	0.0713616	7.62633	2.4153e-14	2.44289e-13
KCNQ5	2237.02	0.544049	0.0781527	6.96137	3.36988e-12	2.8262e-11
ZNF711	312.864	0.543604	0.128524	4.22959	2.34122e-05	8.77307e-05
PPP1R37	1215.76	0.543292	0.0924016	5.87968	4.11059e-09	2.5344e-08
ATP6AP1	5255.12	0.543211	0.0718924	7.5559	4.15982e-14	4.11487e-13
DTX3	229.205	0.543109	0.140394	3.86847	0.000109522	0.000370246
C22orf39	353.115	0.543051	0.132157	4.10913	3.97145e-05	0.000143189
KIAA0556	1040.01	0.542967	0.0763131	7.11499	1.11918e-12	9.82344e-12
ADRBK2	4717.61	0.542646	0.0738574	7.34722	2.0237e-13	1.90087e-12
GGT7	1145.83	0.542592	0.0758007	7.15814	8.17796e-13	7.28463e-12
PIP4K2A	7050.17	0.542404	0.0638087	8.50047	1.88832e-17	2.44576e-16
INSM1	53.1813	0.542115	0.235022	2.30666	0.021074	0.0435978
SPIN1	3052	0.54165	0.0709956	7.62934	2.35954e-14	2.38798e-13
TIGD2	362.664	0.541382	0.112629	4.80676	1.53395e-06	6.86782e-06
APOBEC3D	137.03	0.541069	0.162326	3.33322	0.000858473	0.00244091
CISD1	1395.13	0.540937	0.0723296	7.47877	7.50208e-14	7.27446e-13
ZNF112	219.099	0.540332	0.145421	3.71564	0.000202692	0.00065189
TMEM53	234.574	0.540194	0.133655	4.04171	5.30624e-05	0.00018772
SDHAP2	112.775	0.540164	0.175523	3.07744	0.00208783	0.00551773
CDK5RAP3	2627.96	0.540065	0.070567	7.65322	1.96004e-14	1.99613e-13
TTC28	1621.52	0.539837	0.0736639	7.32838	2.32949e-13	2.17298e-12
LENG8	2861.78	0.539805	0.0646732	8.34665	7.02236e-17	8.76605e-16
SLC9A8	1138.5	0.539386	0.0775586	6.95457	3.5365e-12	2.95675e-11
HERC2P2	500.561	0.538866	0.109834	4.90617	9.28737e-07	4.28361e-06
RBM5	5080.98	0.538357	0.0656304	8.20286	2.34729e-16	2.83376e-15
VPS8	1779.26	0.538094	0.0709448	7.58469	3.33274e-14	3.3231e-13
ARSK	129.028	0.538072	0.169835	3.16821	0.00153381	0.00416147
TTC3	8627.04	0.537682	0.0677857	7.93209	2.15483e-15	2.39142e-14
ZNF818P	159.611	0.537491	0.163442	3.28857	0.00100699	0.00282582
RUFY3	1255.95	0.537217	0.082607	6.50328	7.85861e-11	5.75126e-10
CRY2	314.113	0.537164	0.12203	4.40189	1.07314e-05	4.25138e-05
LOC100506124	103.618	0.536753	0.185997	2.88582	0.00390395	0.00968842
NARS2	2064.58	0.536502	0.0845353	6.34649	2.2028e-10	1.54578e-09
GABPB1-AS1	379.892	0.536057	0.11638	4.6061	4.10298e-06	1.7223e-05
NR5A2	81.5229	0.535832	0.203443	2.63382	0.00844307	0.019317
UBAC1	1578.89	0.535597	0.0683568	7.83532	4.67658e-15	5.05501e-14
RNPC3	454.019	0.535461	0.116133	4.61075	4.01227e-06	1.68728e-05
UBQLN2	1254.7	0.535415	0.0767954	6.97197	3.12538e-12	2.62931e-11
PEPD	6220.47	0.535089	0.0670572	7.97959	1.46824e-15	1.64864e-14
CHCHD10	642.64	0.53483	0.112533	4.75264	2.00776e-06	8.84496e-06
PTK2B	325.982	0.534287	0.112741	4.73907	2.14697e-06	9.42493e-06
TMEM185A	210.844	0.53423	0.14197	3.76299	0.000167892	0.000547576
HIGD2A	1085.05	0.533461	0.0863768	6.17597	6.57568e-10	4.3828e-09
ZNF34	197.58	0.533309	0.154325	3.45576	0.000548743	0.00162161
SECISBP2	1895.5	0.533292	0.0653251	8.16366	3.25032e-16	3.87527e-15
ARID1B	3622.41	0.532917	0.0671598	7.93507	2.10384e-15	2.33964e-14
ERP29	13308.2	0.53283	0.0665004	8.01243	1.12466e-15	1.2797e-14
ANKRD44	2400.22	0.532785	0.0716427	7.43669	1.03241e-13	9.90419e-13
SH3BGRL	2407.96	0.532667	0.0764308	6.96927	3.1858e-12	2.67736e-11
LETMD1	1101.39	0.532349	0.0825357	6.44992	1.11909e-10	8.08406e-10
HACD1	168.619	0.532281	0.159573	3.33565	0.000850992	0.00242118
PCBD2	98.9548	0.531785	0.183403	2.89955	0.00373702	0.00931409
TP53I3	383.023	0.53164	0.115344	4.60918	4.04255e-06	1.69869e-05
FARP1	6857.72	0.531506	0.0599722	8.86254	7.82134e-19	1.12748e-17
C7orf60	487.109	0.531485	0.110737	4.79955	1.59026e-06	7.10617e-06
ANKMY2	1259.69	0.531476	0.0832381	6.38501	1.7139e-10	1.21427e-09
SH3BP5-AS1	203.301	0.531351	0.152111	3.49317	0.000477329	0.00142878
TSPAN6	1152.28	0.531322	0.0819576	6.48289	8.99815e-11	6.54973e-10
CECR6	73.8467	0.531282	0.205629	2.58369	0.00977496	0.0220559
ZNF624	345.583	0.531175	0.125339	4.23791	2.25609e-05	8.46779e-05
ZNF211	476.36	0.531147	0.103229	5.14533	2.67054e-07	1.32205e-06
ZFYVE19	477.178	0.531127	0.0980539	5.41668	6.07152e-08	3.28032e-07
CHMP1B	2991.59	0.530793	0.0740678	7.16631	7.70464e-13	6.87435e-12
ITFG3	1525.73	0.53058	0.0751232	7.06279	1.63187e-12	1.40645e-11
BHLHB9	93.4154	0.530461	0.193695	2.73864	0.00616943	0.0145996
PYGL	4342.3	0.530379	0.0626225	8.46946	2.46542e-17	3.17545e-16
BLOC1S3	440.713	0.52994	0.102485	5.17092	2.32943e-07	1.1635e-06
RNF146	535.71	0.528911	0.100646	5.25517	1.47887e-07	7.58294e-07
ARHGAP26	761.307	0.528877	0.107347	4.9268	8.3589e-07	3.87856e-06
MAP2K5	747.402	0.528742	0.0845911	6.25057	4.08953e-10	2.78883e-09
ABHD5	759.379	0.528652	0.0876708	6.02997	1.63993e-09	1.05156e-08
TMEM234	160.768	0.528601	0.16439	3.21554	0.00130202	0.00357387
ETNK2	518.972	0.528518	0.0978416	5.40177	6.59849e-08	3.55082e-07
FRMD3	430.124	0.528096	0.113035	4.67194	2.98361e-06	1.28028e-05
NEURL2	61.7079	0.528085	0.229799	2.29803	0.0215603	0.0444896
ASAH1	16476	0.527959	0.0873814	6.04201	1.52205e-09	9.79032e-09
SLC9A1	1054.69	0.527882	0.0860555	6.1342	8.55873e-10	5.63957e-09
TUBB4A	13967.4	0.527846	0.077322	6.8266	8.69482e-12	7.02654e-11
LOC155060	144.256	0.527823	0.19147	2.7567	0.00583887	0.0138944
NAV3	1742.26	0.527645	0.075466	6.99183	2.7133e-12	2.29096e-11
ARNT2	3331.7	0.527388	0.0660715	7.98208	1.4389e-15	1.61681e-14
LNX2	1807.52	0.526852	0.0788326	6.68318	2.33819e-11	1.80408e-10
HDAC10	331.893	0.52663	0.117108	4.49694	6.89382e-06	2.80022e-05
UQCR10	1993.19	0.526353	0.069206	7.6056	2.83595e-14	2.84526e-13
CYHR1	352.818	0.526309	0.126475	4.16138	3.16325e-05	0.000115776
AGL	1701.23	0.526217	0.0752051	6.9971	2.61322e-12	2.20877e-11
LYRM7	978.178	0.526079	0.0962214	5.46738	4.56735e-08	2.49932e-07
TXNDC16	397.788	0.525968	0.132687	3.96396	7.37155e-05	0.000255982
PCED1A	1069.34	0.525585	0.0797517	6.59026	4.39058e-11	3.28839e-10
SPTBN1	31451.6	0.525572	0.0595016	8.83289	1.02004e-18	1.44725e-17
CS	11847.2	0.524814	0.0631376	8.31224	9.39128e-17	1.16603e-15
IFI6	306.206	0.524739	0.143293	3.66201	0.000250247	0.000791326
DHRS4-AS1	757.305	0.52472	0.0998554	5.25479	1.48192e-07	7.59378e-07
ZNF85	99.4614	0.524591	0.183694	2.85579	0.00429296	0.0105648
RAB7B	172.949	0.524574	0.146631	3.5775	0.000346891	0.00106829
CAPRIN2	2027.04	0.524198	0.073997	7.08404	1.40009e-12	1.21835e-11
UBR2	2292.03	0.524174	0.0765325	6.84904	7.43489e-12	6.03847e-11
MED13L	6770.51	0.524096	0.0670017	7.82212	5.19405e-15	5.58826e-14
LRCH3	2547.41	0.524005	0.0713997	7.33904	2.15138e-13	2.0138e-12
IFI27L1	108.378	0.52351	0.183005	2.86062	0.00422808	0.0104194
ANTXR2	138.701	0.523488	0.166767	3.13904	0.00169502	0.00456143
LRRC37A4P	122.193	0.523278	0.183485	2.85188	0.00434611	0.0106713
DOCK7	6564.62	0.523147	0.0646894	8.08705	6.11274e-16	7.11528e-15
YTHDF3	7880.63	0.522878	0.0778162	6.7194	1.82477e-11	1.42766e-10
CASC15	144.626	0.522373	0.161716	3.23019	0.00123708	0.00340892
GBA2	2282.02	0.52193	0.0672412	7.76205	8.35656e-15	8.79801e-14
IL16	2909.41	0.52158	0.0848571	6.14657	7.91786e-10	5.23859e-09
SPG11	2390.91	0.521504	0.069609	7.49191	6.78804e-14	6.59392e-13
MAP2K6	520.482	0.520535	0.0985255	5.28325	1.26915e-07	6.57208e-07
NEU3	1720.49	0.52037	0.0810135	6.42325	1.33395e-10	9.55525e-10
FSD1L	430.269	0.519574	0.125148	4.15168	3.3005e-05	0.000120446
PEX12	191.095	0.519534	0.156828	3.31275	0.00092382	0.00261416
TMOD1	353.488	0.519256	0.111575	4.65388	3.25745e-06	1.38786e-05
CDH10	82.0214	0.518682	0.203411	2.54992	0.0107746	0.0240238
PIR	1035.3	0.518522	0.0802084	6.46468	1.01514e-10	7.35939e-10
GLI3	715.731	0.518182	0.0870322	5.95391	2.61815e-09	1.64681e-08
RRBP1	8071.57	0.518044	0.0540433	9.58572	9.18169e-22	1.6066e-20
PPIP5K1	1055.31	0.517988	0.0769412	6.73225	1.67054e-11	1.31524e-10
NUDT16	1361.12	0.517686	0.0812347	6.37272	1.8571e-10	1.31228e-09
ALAD	1918.13	0.51742	0.0730662	7.08153	1.42571e-12	1.23865e-11
UBN2	1502.83	0.51725	0.107345	4.81856	1.44601e-06	6.49921e-06
RNF141	1711.56	0.517135	0.0766341	6.74811	1.49781e-11	1.18385e-10
CPEB3	170.288	0.517014	0.149115	3.46723	0.00052585	0.00155965
THAP9	269.611	0.516953	0.124962	4.13689	3.52045e-05	0.000127983
OLFM1	1321.72	0.516252	0.0796572	6.48091	9.11681e-11	6.63015e-10
CLTCL1	403.013	0.516103	0.106053	4.86645	1.13622e-06	5.17576e-06
LOC101927181	194.226	0.516048	0.146583	3.52052	0.000430709	0.00130225
LAPTM4A	4500.6	0.515812	0.0721189	7.15224	8.53755e-13	7.57579e-12
AP1S2	6438.34	0.515622	0.0582185	8.85668	8.24326e-19	1.18304e-17
STXBP5L	746.381	0.515196	0.0996982	5.16755	2.37179e-07	1.18277e-06
ZNF519	159.668	0.515102	0.161717	3.1852	0.00144654	0.00393855
NRG3	1026.82	0.514939	0.0829377	6.20874	5.34103e-10	3.59538e-09
GOLGA1	2276.82	0.514893	0.0696277	7.39495	1.4146e-13	1.3459e-12
LOC613037	74.2135	0.514593	0.207136	2.48433	0.0129797	0.028355
STARD7-AS1	67.8263	0.514507	0.224201	2.29485	0.0217419	0.0447913
TMEM260	1076.4	0.514315	0.0922434	5.57562	2.46644e-08	1.39343e-07
ENGASE	1018.63	0.51402	0.0896	5.73684	9.64603e-09	5.72718e-08
VPS35	6497.25	0.513721	0.0673858	7.62358	2.46738e-14	2.49091e-13
USP48	7210.64	0.513534	0.05869	8.74994	2.13458e-18	2.97391e-17
CEP95	2630.65	0.513003	0.0726232	7.0639	1.61893e-12	1.39603e-11
HIST1H2BK	1168.94	0.512862	0.0855826	5.9926	2.06516e-09	1.30915e-08
TMEM120A	1173.58	0.512859	0.0761981	6.73061	1.68957e-11	1.32894e-10
LINC01003	73.3299	0.512521	0.207644	2.46826	0.013577	0.0295406
AAED1	388.323	0.512461	0.105617	4.85205	1.22189e-06	5.53798e-06
CTIF	599.254	0.512254	0.0944402	5.42411	5.82437e-08	3.15416e-07
LRIG2	397.566	0.512059	0.119049	4.30123	1.69854e-05	6.51087e-05
SYNRG	2261.38	0.51181	0.0681943	7.50517	6.13512e-14	6.00649e-13
MSX2	69.3254	0.511559	0.220178	2.32339	0.0201581	0.0420255
DEPDC5	820.929	0.511538	0.0865222	5.91222	3.37525e-09	2.09939e-08
PCDHGA4	89.9635	0.511529	0.192611	2.65577	0.00791282	0.0182533
CCDC122	209.086	0.511364	0.146392	3.49312	0.000477407	0.00142878
VPS28	790.148	0.511102	0.084209	6.06945	1.2835e-09	8.31532e-09
PRMT2	3144.46	0.511029	0.0634139	8.05864	7.71502e-16	8.93324e-15
DKFZP434I0714	78.9459	0.510839	0.203265	2.51317	0.0119651	0.0264057
RAB7A	20778.4	0.509998	0.0692146	7.36837	1.72731e-13	1.62813e-12
EME2	76.6664	0.509789	0.226359	2.25212	0.0243145	0.0493819
LOC102723780	246.629	0.509727	0.142413	3.57922	0.000344625	0.00106179
CYP20A1	527.245	0.509711	0.10277	4.95973	7.05919e-07	3.30865e-06
FASTK	1816.75	0.509628	0.0722889	7.04987	1.79082e-12	1.53447e-11
ZSCAN21	544.517	0.509471	0.0987743	5.15793	2.497e-07	1.23955e-06
PLXNB3	414.124	0.509444	0.112789	4.51678	6.27861e-06	2.56511e-05
ATP5G3	4376.66	0.509441	0.0626666	8.12939	4.31453e-16	5.07318e-15
HOXB13	212.253	0.509108	0.142203	3.58014	0.000343409	0.00105845
LGALS1	2184.09	0.509007	0.171487	2.9682	0.00299547	0.00763214
SERPINB1	148.368	0.508952	0.166208	3.06213	0.00219767	0.00578159
MR1	261.084	0.508713	0.133301	3.81628	0.000135476	0.000449647
FBXO10	636.076	0.50871	0.0881024	5.77408	7.73752e-09	4.63308e-08
B2M	21348.5	0.508532	0.0741841	6.855	7.13121e-12	5.80638e-11
ZNF189	773.186	0.508518	0.0892387	5.6984	1.20941e-08	7.07437e-08
CABLES2	601.698	0.507834	0.0956954	5.30678	1.1158e-07	5.82454e-07
NBPF12	366.978	0.507685	0.111503	4.55309	5.2864e-06	2.18064e-05
CC2D1B	2809.48	0.507619	0.0621643	8.16577	3.19397e-16	3.81089e-15
ZNF3	1318.71	0.507571	0.075258	6.74441	1.5365e-11	1.21266e-10
ABHD14B	1262.85	0.507319	0.0857176	5.91849	3.24902e-09	2.02476e-08
GALT	219.778	0.507176	0.134505	3.77068	0.000162804	0.000532589
ZDHHC1	159.845	0.506897	0.158732	3.19342	0.00140598	0.00383908
PNPLA3	450.992	0.506697	0.101835	4.97568	6.50176e-07	3.06244e-06
LOC101928489	92.5171	0.506447	0.190934	2.65248	0.0079903	0.0184137
SNTA1	671.244	0.506307	0.093813	5.39698	6.77709e-08	3.63968e-07
NDUFB5	2905.75	0.506232	0.0664326	7.62023	2.53218e-14	2.55313e-13
PLEKHM3	429.407	0.506049	0.10489	4.82456	1.40316e-06	6.31714e-06
SUCLG1	5438.27	0.50597	0.057114	8.85894	8.07775e-19	1.16238e-17
SAP30L	598.815	0.505644	0.0925138	5.4656	4.61347e-08	2.5237e-07
NPIPB4	155.241	0.505511	0.178194	2.83686	0.00455595	0.011146
RABL2B	264.266	0.505109	0.130877	3.85942	0.000113657	0.000383026
KANTR	78.0144	0.505096	0.206456	2.44651	0.0144248	0.0311675
LOC101927021	203.097	0.504189	0.138437	3.64201	0.000270518	0.000848799
ENTHD2	1008.75	0.504178	0.0824287	6.11653	9.56344e-10	6.271e-09
CEP152	1703.91	0.503927	0.090896	5.54399	2.95654e-08	1.65189e-07
NIT1	450.03	0.503596	0.102963	4.89101	1.00318e-06	4.60988e-06
BRD8	2593.44	0.503319	0.0719257	6.99776	2.60096e-12	2.20064e-11
FAM102A	6629.91	0.503267	0.0599645	8.39275	4.74913e-17	5.97439e-16
NSUN5P2	204.022	0.502908	0.140961	3.56771	0.000360109	0.00110509
USP32P2	255.069	0.502434	0.134784	3.7277	0.000193235	0.000623702
ACAT2	1742.4	0.502423	0.0779691	6.44388	1.16459e-10	8.38659e-10
IFT140	547.707	0.50198	0.1008	4.97997	6.35951e-07	2.99806e-06
TPT1-AS1	106.869	0.501947	0.18679	2.68723	0.00720471	0.0168017
ZNF333	188.899	0.501739	0.146211	3.43161	0.000599999	0.00176055
ZNF358	853.426	0.50142	0.0888819	5.64141	1.68661e-08	9.70807e-08
DOCK11	644.305	0.501416	0.095189	5.26758	1.38233e-07	7.12625e-07
MFSD11	929.274	0.501205	0.0884772	5.66479	1.47202e-08	8.5274e-08
ZNF350	391.404	0.501108	0.125146	4.00418	6.22341e-05	0.000217792
HMGN3	3571.04	0.501058	0.0682429	7.34228	2.09989e-13	1.96901e-12
ZNF611	467.673	0.500432	0.108899	4.59535	4.32014e-06	1.80602e-05
NDUFA3	633.302	0.499607	0.0970145	5.14981	2.60744e-07	1.2916e-06
PFKFB2	1842.18	0.499332	0.0727125	6.86721	6.54681e-12	5.35207e-11
C14orf1	1667.35	0.499244	0.101268	4.92993	8.22573e-07	3.82005e-06
TP53	959.088	0.49924	0.0782393	6.38093	1.76011e-10	1.24646e-09
QKI	3323.84	0.49908	0.0644727	7.74094	9.86821e-15	1.03425e-13
DXO	221.134	0.499033	0.135576	3.68083	0.000232475	0.000739748
AES	4035.99	0.49897	0.0660011	7.56003	4.02975e-14	3.99108e-13
SZT2	2168.23	0.498915	0.0679061	7.34712	2.02523e-13	1.90121e-12
ZNF326	2866.69	0.498102	0.0697683	7.13938	9.37508e-13	8.2872e-12
SLC12A6	418.405	0.497879	0.107864	4.61582	3.91549e-06	1.65172e-05
NCOA7	2259.13	0.497618	0.0739241	6.73147	1.67956e-11	1.3217e-10
PIM1	101.11	0.497303	0.188899	2.63265	0.00847226	0.0193783
NDUFS7	713.077	0.497094	0.0986972	5.03655	4.73989e-07	2.27355e-06
KMT2C	6054.78	0.496548	0.073004	6.80165	1.03425e-11	8.31252e-11
KIAA1522	1650.27	0.496519	0.0815761	6.08657	1.15353e-09	7.50628e-09
TMEM136	264.42	0.496388	0.123192	4.02938	5.59248e-05	0.000197289
IVNS1ABP	14310.8	0.496345	0.070139	7.07659	1.47748e-12	1.28019e-11
ARMCX6	406.59	0.496111	0.108612	4.56773	4.93042e-06	2.04473e-05
LGALS8	1803.43	0.495973	0.0748233	6.6286	3.38895e-11	2.57557e-10
NEK1	1453.04	0.495899	0.0757097	6.55	5.75354e-11	4.27244e-10
PLD3	917.309	0.495868	0.0971023	5.10666	3.2791e-07	1.60372e-06
MAVS	9913.74	0.495862	0.0636509	7.79035	6.6826e-15	7.10487e-14
MYRF	381.308	0.495542	0.111145	4.45851	8.25295e-06	3.31489e-05
ANXA5	70205.4	0.495244	0.0693772	7.13843	9.43998e-13	8.33548e-12
MYLK	655.605	0.495076	0.0887628	5.57752	2.43973e-08	1.37883e-07
ZNF671	198.573	0.494882	0.138333	3.57747	0.000346933	0.00106829
MRPL15	3127	0.494843	0.0605273	8.17553	2.94559e-16	3.53537e-15
FBXO16	85.1049	0.494813	0.198722	2.48998	0.012775	0.027957
PTGR1	883.418	0.494741	0.0804588	6.149	7.79727e-10	5.16514e-09
MFSD8	345.085	0.494714	0.110753	4.46681	7.93938e-06	3.19527e-05
CYB5R1	1142.12	0.494606	0.0808542	6.11726	9.51984e-10	6.24643e-09
SEC14L1	6825.92	0.494393	0.0698044	7.08254	1.41531e-12	1.23027e-11
SLC35E2	683.715	0.494359	0.0890655	5.55051	2.84839e-08	1.59366e-07
SNN	1371.48	0.494221	0.0715656	6.90585	4.99039e-12	4.11917e-11
PCBP4	971.615	0.494166	0.0799415	6.1816	6.34556e-10	4.23813e-09
GABARAPL1	2086.49	0.494071	0.0783205	6.30832	2.82077e-10	1.95487e-09
NDUFA5	3912.84	0.493962	0.0746625	6.61593	3.69216e-11	2.79683e-10
ASB8	606.223	0.493803	0.091905	5.37297	7.74519e-08	4.13766e-07
FBXO44	736.958	0.493687	0.0888133	5.55871	2.7177e-08	1.52528e-07
ARHGAP17	1870.58	0.493545	0.0881818	5.5969	2.18221e-08	1.23934e-07
AP2A2	2268.7	0.493255	0.0731137	6.74642	1.51543e-11	1.19661e-10
ZFYVE21	694.897	0.493056	0.090048	5.47548	4.36321e-08	2.39307e-07
PALM	302.553	0.492261	0.130332	3.77696	0.000158754	0.000520181
PITPNA-AS1	237.604	0.492194	0.130916	3.75962	0.000170171	0.00055434
CCT6P3	94.5138	0.492165	0.186273	2.64217	0.00823757	0.0189163
ZNF76	508.587	0.49196	0.102057	4.82042	1.43259e-06	6.44427e-06
ZNF252P	1487.36	0.491776	0.0788757	6.23482	4.52303e-10	3.07798e-09
SUPT7L	3453.85	0.491731	0.0684929	7.1793	7.00672e-13	6.27237e-12
NQO2	1023.69	0.491595	0.0780611	6.29757	3.02353e-10	2.08735e-09
SCP2	2396.32	0.490701	0.0704985	6.96045	3.3918e-12	2.84017e-11
ZNF419	225.848	0.490688	0.161324	3.04164	0.00235294	0.00614617
DNAL4	165.284	0.490459	0.157826	3.10759	0.00188617	0.00502574
INPP5E	620.47	0.490411	0.101464	4.83336	1.3425e-06	6.05918e-06
SOX13	517.849	0.490386	0.100397	4.88448	1.03702e-06	4.74925e-06
OS9	7477.3	0.490078	0.0604154	8.1118	4.98736e-16	5.83888e-15
KCNE4	847.753	0.489975	0.118258	4.14329	3.42366e-05	0.000124632
ZHX2	153.876	0.489176	0.160553	3.04681	0.00231283	0.00604823
BRI3	591.338	0.48914	0.100818	4.8517	1.22405e-06	5.54624e-06
GYPC	6865.08	0.489127	0.0775773	6.30503	2.88142e-10	1.99349e-09
HEIH	228.442	0.489117	0.139609	3.50348	0.000459217	0.00137944
NR3C1	1400.8	0.488575	0.0757954	6.44597	1.14864e-10	8.29016e-10
RGL2	963.895	0.488387	0.0829846	5.88528	3.97386e-09	2.45476e-08
CDK19	734.195	0.488249	0.0964578	5.06179	4.15342e-07	2.00822e-06
ABHD4	820.716	0.488223	0.0968589	5.04056	4.64175e-07	2.22977e-06
HDX	223.205	0.488127	0.146357	3.33518	0.000852454	0.00242492
PITPNM1	739.791	0.488102	0.0928405	5.25743	1.46085e-07	7.50003e-07
WNK3	672.995	0.487668	0.0937038	5.20436	1.94669e-07	9.83238e-07
SMDT1	195.025	0.487081	0.138781	3.5097	0.000448606	0.00135132
BDH2	589.357	0.486762	0.0918625	5.2988	1.16563e-07	6.06706e-07
SH3RF3	74.8044	0.486391	0.21166	2.29799	0.0215625	0.0444896
SAT2	887.072	0.486353	0.0919351	5.29018	1.22198e-07	6.34203e-07
KDM6B	1148.11	0.486236	0.0930344	5.22641	1.72829e-07	8.7813e-07
L1CAM	21103.4	0.485906	0.0606979	8.00532	1.19161e-15	1.34642e-14
CARD8	632.561	0.485672	0.0964557	5.03518	4.7741e-07	2.28928e-06
MPV17	2636.63	0.485225	0.062631	7.74736	9.38211e-15	9.84575e-14
QPRT	519.217	0.484995	0.116857	4.15034	3.31984e-05	0.00012107
ATP10A	346.234	0.484829	0.114661	4.22837	2.35395e-05	8.81264e-05
COBLL1	1678.7	0.484773	0.0695334	6.97179	3.12932e-12	2.63126e-11
ARRDC1-AS1	177.949	0.484577	0.145032	3.34117	0.000834258	0.00237984
DET1	255.549	0.484563	0.124455	3.89349	9.8811e-05	0.000336705
CRBN	817.784	0.484509	0.0858103	5.64628	1.63961e-08	9.45094e-08
SLC25A46	3140.44	0.483684	0.0675866	7.15651	8.27539e-13	7.36332e-12
LOC100506639	92.8395	0.483471	0.189592	2.55006	0.0107704	0.0240177
RNFT1	1825.62	0.483278	0.0741651	6.51624	7.20906e-11	5.29743e-10
PSPH	3069.32	0.48327	0.0665146	7.26562	3.71327e-13	3.40114e-12
NUDT16L1	171.604	0.483084	0.158449	3.04883	0.00229737	0.00601167
HSPG2	2975.38	0.482953	0.0637913	7.57084	3.70824e-14	3.68166e-13
MNT	1434.27	0.482839	0.0853177	5.65931	1.51982e-08	8.79173e-08
TBX3	404.244	0.482716	0.110364	4.37387	1.22065e-05	4.80285e-05
ARFRP1	478.115	0.48215	0.100661	4.78984	1.66917e-06	7.44032e-06
H2AFJ	2311.03	0.482137	0.0737798	6.53481	6.36905e-11	4.71007e-10
STX3	3743.63	0.482134	0.0697875	6.90861	4.89442e-12	4.04408e-11
ZKSCAN8	2491.42	0.481788	0.0853283	5.64628	1.63954e-08	9.45094e-08
SLC22A17	208.804	0.481719	0.150008	3.21128	0.00132143	0.00362471
BMP1	932.484	0.481477	0.0867889	5.54768	2.89493e-08	1.61914e-07
PABPC5	128.281	0.481119	0.177339	2.71299	0.00666789	0.015667
ZCCHC9	1498.46	0.480903	0.0885135	5.4331	5.53819e-08	3.00621e-07
CENPT	615.638	0.480563	0.0901014	5.33357	9.62978e-08	5.06266e-07
ZNF572	157.673	0.479888	0.151688	3.16366	0.00155798	0.00422352
BTBD6	705.837	0.479705	0.0932539	5.14407	2.68848e-07	1.33053e-06
ATPIF1	1019.6	0.479617	0.0821279	5.83988	5.22393e-09	3.1965e-08
KIAA1161	78.5339	0.479459	0.207574	2.30982	0.0208981	0.0432976
LOC389834	103.299	0.479455	0.191336	2.50583	0.0122164	0.0268908
TCTA	531.531	0.478531	0.0969743	4.93462	8.03067e-07	3.73589e-06
SPEG	200.502	0.47838	0.137391	3.4819	0.000497877	0.00148347
ZNF550	519.709	0.478302	0.113098	4.2291	2.34625e-05	8.78785e-05
LINC01419	5943.61	0.477959	0.0659275	7.24977	4.17474e-13	3.80874e-12
TAZ	529.887	0.477827	0.110878	4.30948	1.63638e-05	6.29493e-05
TMUB2	915.89	0.477783	0.0797534	5.99075	2.08873e-09	1.32305e-08
ORAI3	484.671	0.477614	0.10689	4.46826	7.88582e-06	3.17608e-05
ZC3H7B	9254.47	0.4774	0.0665076	7.17813	7.0669e-13	6.32275e-12
TBC1D8B	512.496	0.477215	0.115737	4.12328	3.7352e-05	0.000135243
FAM172A	972.891	0.476648	0.0874395	5.45117	5.00393e-08	2.72717e-07
FMNL2	8657.48	0.47646	0.0666202	7.15189	8.5594e-13	7.59102e-12
SETD4	481.627	0.476252	0.103191	4.61526	3.92613e-06	1.65578e-05
MON2	3101.77	0.476151	0.0726967	6.54983	5.76027e-11	4.27547e-10
TECPR1	1541.1	0.47542	0.0731611	6.49826	8.12523e-11	5.93567e-10
TMEM8B	148.813	0.475286	0.16549	2.872	0.0040788	0.0100822
GUCD1	3243.95	0.475276	0.0661881	7.18068	6.93659e-13	6.21302e-12
ZNF587	1157.77	0.475102	0.0867696	5.47544	4.36433e-08	2.39307e-07
CNP	7934.74	0.474988	0.067505	7.03634	1.9736e-12	1.68662e-11
PARP10	943.771	0.474929	0.0881666	5.38672	7.17533e-08	3.84464e-07
GUF1	2915.05	0.474286	0.0719606	6.59092	4.3711e-11	3.27742e-10
CTSV	1106.91	0.474095	0.0805572	5.8852	3.9758e-09	2.45502e-08
OPA3	1597.9	0.473898	0.0754163	6.28376	3.30475e-10	2.27086e-09
HDHD2	1030.03	0.473418	0.0821301	5.76424	8.20261e-09	4.90431e-08
CFAP69	124.645	0.473203	0.17018	2.7806	0.00542593	0.013021
RNF139	1512.69	0.472912	0.0827755	5.71319	1.10881e-08	6.52597e-08
NDUFA4	4020.46	0.472541	0.0608288	7.76837	7.95026e-15	8.38114e-14
OMA1	1292.86	0.472492	0.0780359	6.0548	1.40594e-09	9.07225e-09
SIRPA	13918.5	0.472382	0.0640211	7.37853	1.60052e-13	1.51479e-12
NEAT1	39678.8	0.472364	0.168813	2.79815	0.00513955	0.0123886
NLGN4X	208.341	0.472148	0.14549	3.24524	0.00117353	0.00324926
CHFR	1174.04	0.471804	0.0761696	6.19413	5.86094e-10	3.93555e-09
INCENP	5504.31	0.471796	0.0590318	7.99224	1.32514e-15	1.49209e-14
KIDINS220	6871.53	0.471747	0.0711932	6.62629	3.44228e-11	2.61365e-10
NDUFA1	1206.48	0.47174	0.0860376	5.48296	4.18278e-08	2.29819e-07
CLEC16A	1805.77	0.471718	0.0704874	6.69223	2.19794e-11	1.70073e-10
MMACHC	822.655	0.471544	0.0872481	5.40464	6.49403e-08	3.49694e-07
SHARPIN	579.864	0.471202	0.0958132	4.91792	8.74664e-07	4.0492e-06
CSAG3	236.694	0.470924	0.139085	3.38587	0.000709535	0.00205223
FBXL20	688.679	0.470723	0.0884908	5.31945	1.04079e-07	5.4523e-07
NIPBL-AS1	663.616	0.470588	0.0909972	5.17146	2.32269e-07	1.1612e-06
MBP	4335.57	0.470121	0.0725912	6.47628	9.40104e-11	6.82766e-10
AHSA2	2240.34	0.469988	0.0809014	5.80939	6.26994e-09	3.79499e-08
NAGLU	2368.17	0.46996	0.0652172	7.20607	5.75883e-13	5.19834e-12
ZBTB5	557.722	0.469775	0.0963268	4.87688	1.07776e-06	4.92193e-06
PRKAR1B	449.877	0.46966	0.108097	4.34482	1.39392e-05	5.43577e-05
ABCD4	922.728	0.46958	0.0810504	5.79368	6.88612e-09	4.14934e-08
ZNF790	115.809	0.469544	0.181118	2.59247	0.00952888	0.0215668
ANKRD13A	2159.53	0.469514	0.0737901	6.36283	1.98071e-10	1.39658e-09
CPPED1	1124.76	0.469503	0.085046	5.52058	3.37887e-08	1.873e-07
CECR7	569.601	0.469486	0.092799	5.05917	4.21081e-07	2.03483e-06
ZNF853	92.933	0.469214	0.191519	2.44996	0.0142871	0.0308989
AUH	453.392	0.468895	0.115123	4.073	4.64117e-05	0.00016575
NME5	99.741	0.468702	0.186172	2.51757	0.0118167	0.0261138
PIK3CD-AS2	294.327	0.468198	0.119163	3.92904	8.52852e-05	0.00029333
PFKM	5680.6	0.46815	0.062974	7.43401	1.05352e-13	1.01007e-12
TGFBR2	1741.03	0.468125	0.0853441	5.48515	4.1311e-08	2.2721e-07
RBM4B	247.14	0.46793	0.131234	3.5656	0.000363021	0.00111318
FSTL5	2480.83	0.467823	0.0763132	6.13031	8.77084e-10	5.7723e-09
TTC28-AS1	97.7279	0.467525	0.190916	2.44886	0.0143311	0.0309815
VPS18	2861.73	0.467464	0.0684389	6.83038	8.46907e-12	6.85094e-11
GPS2	2910.12	0.467255	0.065865	7.09413	1.30166e-12	1.13697e-11
MPPE1	295.834	0.467045	0.119365	3.91275	9.12529e-05	0.000312
CAPN1	2972.52	0.466916	0.0696469	6.70405	2.02728e-11	1.57847e-10
VPS39	2179.43	0.466641	0.0656899	7.1037	1.21459e-12	1.06436e-11
AP3S1	1845.1	0.466361	0.0775198	6.01602	1.7876e-09	1.13931e-08
NECAP2	706.732	0.466284	0.0855651	5.44946	5.05224e-08	2.75072e-07
LAMC3	776.448	0.466142	0.106038	4.39601	1.10259e-05	4.36591e-05
U2AF1L4	165.234	0.466104	0.149644	3.11476	0.00184096	0.00491336
FAM122A	828.372	0.466017	0.0893657	5.21472	1.84095e-07	9.32151e-07
PREX1	1087.75	0.465655	0.0872158	5.33911	9.34034e-08	4.92363e-07
NISCH	1475.4	0.465593	0.0711589	6.54301	6.02926e-11	4.46287e-10
TCTN1	342.375	0.465486	0.121122	3.8431	0.000121489	0.000407722
SOX6	6219.14	0.465211	0.0733859	6.33924	2.30902e-10	1.61445e-09
EFCAB2	101.359	0.46514	0.18174	2.55938	0.010486	0.0234674
TMEM116	113.161	0.464943	0.173404	2.68126	0.00733447	0.0170797
POGZ	4828.66	0.464935	0.0620351	7.49471	6.64444e-14	6.47384e-13
COPS7A	2222.48	0.464905	0.0752227	6.18039	6.39451e-10	4.26907e-09
APPBP2	3301.17	0.464658	0.0672911	6.90519	5.01357e-12	4.1362e-11
GJA3	1599.51	0.464123	0.0720148	6.44482	1.15737e-10	8.3457e-10
PI4KA	4201.22	0.462902	0.0635033	7.28943	3.1128e-13	2.87552e-12
COX6C	5349.6	0.462622	0.0617283	7.49449	6.65552e-14	6.48074e-13
OSBPL9	7578.63	0.462479	0.0635293	7.27977	3.34378e-13	3.08362e-12
NDUFB2	698.94	0.462074	0.0954066	4.84321	1.27758e-06	5.77586e-06
APBB2	724.872	0.461503	0.0855955	5.39167	6.98057e-08	3.74524e-07
PITX2	148.001	0.461262	0.173788	2.65417	0.00795039	0.0183322
NMNAT1	301.262	0.46119	0.117848	3.91345	9.09869e-05	0.000311223
CCDC84	180.959	0.461016	0.151644	3.04013	0.00236476	0.00617506
PCDHB16	179.618	0.460991	0.144509	3.19006	0.00142245	0.00387768
SLC4A3	542.605	0.460982	0.105082	4.38689	1.14984e-05	4.54299e-05
TSPYL1	1460.23	0.460859	0.0767042	6.00827	1.87517e-09	1.19197e-08
TMLHE	465.449	0.460681	0.0996504	4.62298	3.78273e-06	1.59989e-05
SCAMP1-AS1	115.394	0.460628	0.174778	2.63551	0.00840114	0.0192347
ASB16-AS1	170.636	0.46058	0.14679	3.13769	0.00170284	0.00457869
CHURC1	746.896	0.460479	0.0903367	5.09736	3.44419e-07	1.68091e-06
SNX16	320.814	0.459868	0.136809	3.3614	0.000775483	0.00222865
C12orf76	295.175	0.459647	0.127384	3.60835	0.000308155	0.00095597
CLIP3	229.692	0.459562	0.138795	3.31109	0.000929341	0.0026284
DUSP8	126.476	0.45937	0.165799	2.77065	0.00559454	0.0133794
PDE10A	194.209	0.459333	0.150236	3.0574	0.00223264	0.00585744
KIAA0895L	336.135	0.459042	0.117125	3.91926	8.88211e-05	0.0003042
ZNF33B	790.831	0.458915	0.0850094	5.3984	6.72368e-08	3.61459e-07
ZNF83	925.223	0.458602	0.0941506	4.87095	1.11065e-06	5.06353e-06
HKR1	717.646	0.458372	0.0856395	5.35234	8.68243e-08	4.60345e-07
YPEL2	944.747	0.458331	0.0816757	5.61159	2.00473e-08	1.14335e-07
KIAA0430	2960.15	0.458166	0.0618125	7.41219	1.2423e-13	1.18755e-12
MAPKAPK5-AS1	276.373	0.458114	0.126872	3.61084	0.000305205	0.000947545
DGKI	91.8724	0.457677	0.19951	2.29401	0.0217902	0.0448684
THTPA	293.966	0.457663	0.123191	3.71506	0.000203156	0.000653123
LDLRAP1	1040.51	0.45739	0.0786552	5.81512	6.05905e-09	3.67972e-08
DISP1	101.359	0.45723	0.186297	2.45431	0.0141157	0.0305934
LOC100129917	107.254	0.456912	0.183118	2.49518	0.0125893	0.0275879
NAPB	715.717	0.456696	0.110401	4.13671	3.52325e-05	0.000128056
HERC2P3	192.782	0.456636	0.138274	3.30241	0.000958591	0.00270229
WDR44	1091.02	0.456341	0.0808214	5.64629	1.63943e-08	9.45094e-08
ACSS2	1768.64	0.455793	0.0980007	4.65092	3.3046e-06	1.40758e-05
MVK	840.918	0.45559	0.0882788	5.16081	2.45883e-07	1.22247e-06
ATP6V0A4	4152.61	0.455544	0.0784179	5.80919	6.27759e-09	3.7982e-08
CASKIN1	136.869	0.455535	0.177307	2.56918	0.0101939	0.0229087
ANKS1B	869.007	0.455139	0.086563	5.25789	1.45714e-07	7.48621e-07
SMARCA2	2268.82	0.454849	0.0707004	6.43347	1.24723e-10	8.95786e-10
TMEM70	601.998	0.454812	0.0997497	4.55953	5.12686e-06	2.1186e-05
STK25	1380.07	0.454781	0.0774196	5.87424	4.24794e-09	2.61311e-08
DISP2	147.344	0.454702	0.161089	2.82267	0.00476256	0.0116059
TUG1	7265.47	0.454531	0.0738613	6.15384	7.56268e-10	5.01589e-09
ARFGEF2	9722.95	0.45436	0.0591377	7.68308	1.55303e-14	1.60075e-13
LOC642852	557.683	0.454286	0.101553	4.4734	7.69868e-06	3.10457e-05
PRKAB1	506.002	0.454245	0.0998898	4.54747	5.42955e-06	2.23798e-05
ONECUT1	242.452	0.454226	0.141541	3.20915	0.00133128	0.00365034
ATP5H	3479.52	0.454107	0.0615755	7.3748	1.64591e-13	1.55412e-12
SNX3	4041.27	0.45382	0.0643494	7.05243	1.75818e-12	1.50729e-11
IKBKE	301.589	0.453763	0.125511	3.61534	0.000299956	0.000933217
AP4M1	339.29	0.453449	0.115565	3.92376	8.71788e-05	0.000299144
NICN1	187.053	0.453325	0.145178	3.12255	0.00179293	0.00479703
RP2	870.565	0.453288	0.0920729	4.92314	8.51669e-07	3.94951e-06
ZNF549	496.064	0.453105	0.104985	4.31589	1.58959e-05	6.12802e-05
APH1A	4864.66	0.453007	0.0660703	6.85645	7.05947e-12	5.75665e-11
DHCR24	5600.23	0.453001	0.0660967	6.8536	7.20125e-12	5.85752e-11
DCP1B	352.694	0.452652	0.109727	4.12525	3.70327e-05	0.000134237
DKFZP586I1420	834.854	0.452513	0.118276	3.8259	0.000130294	0.000434304
NSUN5P1	229.487	0.452227	0.129194	3.50036	0.000464639	0.00139521
NCOA2	3032.12	0.452068	0.0743584	6.07958	1.20497e-09	7.82528e-09
KIN	1110.8	0.451305	0.0883143	5.11022	3.21791e-07	1.5757e-06
ZNF18	329.867	0.451006	0.120351	3.74742	0.000178664	0.000579558
LOC103611081	131.921	0.450646	0.176955	2.54668	0.0108754	0.0242186
ZHX1	2397.87	0.450492	0.0790755	5.69699	1.21943e-08	7.12526e-08
NXPH4	345.03	0.450412	0.11332	3.9747	7.04674e-05	0.000244965
PGM1	3244.2	0.449943	0.0613496	7.33407	2.2326e-13	2.08741e-12
NR2C1	1444.96	0.449798	0.0778135	5.78046	7.44971e-09	4.47397e-08
DIP2A	1110.79	0.449721	0.0796267	5.64786	1.62456e-08	9.37421e-08
TSPO	790.177	0.44966	0.11706	3.84127	0.0001224	0.000410527
FBXO8	325.233	0.449623	0.113442	3.96346	7.38718e-05	0.00025647
DYRK4	327.025	0.449349	0.114609	3.92072	8.82842e-05	0.000302489
ARSG	533.461	0.448923	0.0971315	4.62181	3.8041e-06	1.60795e-05
FLYWCH2	372.247	0.448434	0.119903	3.73996	0.000184048	0.000595592
LOC220729	664.709	0.448216	0.090137	4.9726	6.60602e-07	3.10704e-06
WDR47	620.34	0.448144	0.111566	4.01686	5.89775e-05	0.000207336
LINC00265	500.659	0.447797	0.102609	4.36413	1.27632e-05	5.0073e-05
PRKCB	1292.92	0.447722	0.0789105	5.6738	1.39665e-08	8.11605e-08
RABEP2	214.176	0.447501	0.14489	3.08856	0.00201131	0.00533377
GOLGB1	7129.2	0.447107	0.0915252	4.88507	1.03393e-06	4.73642e-06
VPS13A	3939.84	0.447084	0.0968903	4.61433	3.94368e-06	1.66145e-05
CDC42BPA	4054.97	0.446981	0.0719792	6.20986	5.30324e-10	3.57142e-09
LINC00518	871.054	0.446767	0.0834426	5.35419	8.59411e-08	4.55961e-07
ZDHHC8	1448.68	0.446403	0.0823673	5.41967	5.97089e-08	3.23134e-07
ATF6B	2254.85	0.44579	0.0651067	6.84707	7.538e-12	6.11082e-11
LIN54	1808.71	0.44577	0.0752133	5.92674	3.0901e-09	1.93018e-08
NDUFA6	2296.89	0.445576	0.0646603	6.89102	5.53933e-12	4.55603e-11
MORC3	2847.35	0.44544	0.0701031	6.35407	2.09686e-10	1.47527e-09
C4orf29	240.328	0.444996	0.14205	3.13268	0.00173219	0.00465375
EZH1	777.987	0.444602	0.0841066	5.28617	1.24902e-07	6.47195e-07
NXF1	1938.74	0.444503	0.0776204	5.72663	1.02448e-08	6.05605e-08
CCDC88A	18430.2	0.443807	0.0877814	5.05582	4.28547e-07	2.06967e-06
SLC31A2	196.544	0.443714	0.14284	3.10636	0.00189405	0.00504261
COX4I1	5255.18	0.44352	0.0604764	7.33377	2.23775e-13	2.09102e-12
KLF6	5731.57	0.443512	0.0587796	7.54534	4.51119e-14	4.45157e-13
IRS1	657.09	0.443394	0.0879188	5.04322	4.57751e-07	2.20283e-06
ATP5S	167.949	0.443314	0.153501	2.88801	0.00387685	0.0096256
DVL3	5186.31	0.443294	0.0660629	6.71018	1.94383e-11	1.51641e-10
TSPYL4	379.57	0.443233	0.117831	3.7616	0.000168833	0.000550423
NKTR	3887.97	0.443182	0.0839288	5.28045	1.28867e-07	6.66464e-07
FKBP1B	97.3405	0.442923	0.190702	2.32259	0.0202013	0.0420954
PI4KAP2	186.383	0.442836	0.146611	3.02048	0.00252373	0.00654168
SRSF8	1214.98	0.44275	0.0880099	5.03068	4.88742e-07	2.34133e-06
COQ6	456.219	0.442744	0.101391	4.36671	1.26134e-05	4.95213e-05
MTIF3	1079.53	0.442579	0.0766055	5.77737	7.58764e-09	4.55108e-08
ZNF280A	343.865	0.442375	0.113074	3.91227	9.14308e-05	0.000312543
NDUFV1	3164.99	0.442368	0.063373	6.98039	2.94362e-12	2.47897e-11
KCTD21	256.069	0.442341	0.130149	3.39873	0.000676986	0.00196722
TUFT1	243.693	0.442202	0.129172	3.42334	0.000618558	0.00181075
MAGI2	117.153	0.442181	0.182689	2.4204	0.0155035	0.0332235
MICU3	207.932	0.442063	0.150422	2.93883	0.00329459	0.00831369
MSRB2	185.365	0.441642	0.145637	3.03248	0.00242549	0.00631735
HLA-C	3615.14	0.44161	0.0759848	5.81182	6.17976e-09	3.746e-08
ZNF480	1903.85	0.441467	0.0796647	5.54157	2.99778e-08	1.67205e-07
[truncated: 2,355 more rows]
