# Supplementary material for: A Network of MicroRNAs and mRNAs Involved in Melanosome Maturation and Trafficking Defines the Lower Response of Pigmentable Melanoma Cells to Targeted Therapy
Source: Cancers (Basel). 2023 Jan 31;15(3):894. doi: 10.3390/cancers15030894 (PMC9913661; doi:10.3390/cancers15030894)
Supplement: Supplementary file 1 [file cancers-15-00894-s001.zip › Supplementary Table S4-List of 6408 DE RNAs in A375 cells upon 48h of treatment with 1uM vem (GSE89129).xlsx]

## Sheet: DE RNAs in A375 
ensgene	baseMean	log2FoldChange	lfcSE	pvalue	padj	entrezid	genename	description
ENSG00000257335	58.1167	10.291	2.87649	2.06903e-14	1.94806e-13	8972	MGAM	maltase-glucoamylase [Source:HGNC Symbol;Acc:HGNC:7043]
ENSG00000125851	1268.76	9.88304	0.481885	8.148e-92	5.68781e-90	5126	PCSK2	proprotein convertase subtilisin/kexin type 2 [Source:HGNC Symbol;Acc:HGNC:8744]
ENSG00000171819	878.879	9.84511	0.58625	1.88591e-62	7.94859e-61	10218	ANGPTL7	angiopoietin like 7 [Source:HGNC Symbol;Acc:HGNC:24078]
ENSG00000080166	2001.32	9.32559	0.333918	2.6545e-170	4.5966e-168	1638	DCT	dopachrome tautomerase [Source:HGNC Symbol;Acc:HGNC:2709]
ENSG00000135824	228.479	7.37758	0.853121	2.29863e-21	3.06548e-20	85397	RGS8	regulator of G protein signaling 8 [Source:HGNC Symbol;Acc:HGNC:16810]
ENSG00000120729	50.5508	7.16643	0.880069	3.60076e-18	4.09124e-17	9499	MYOT	myotilin [Source:HGNC Symbol;Acc:HGNC:12399]
ENSG00000165899	107.978	6.93312	0.624826	1.65285e-28	2.93961e-27	283310	OTOGL	otogelin like [Source:HGNC Symbol;Acc:HGNC:26901]
ENSG00000136999	2577.69	6.89572	0.142517	0	0	4856	CCN3	cellular communication network factor 3 [Source:HGNC Symbol;Acc:HGNC:7885]
ENSG00000105880	113.32	6.55006	0.620571	3.73363e-26	6.03924e-25	1749	DLX5	distal-less homeobox 5 [Source:HGNC Symbol;Acc:HGNC:2918]
ENSG00000271447	61.8594	6.08212	0.658416	4.88385e-21	6.3948e-20	79148	MMP28	matrix metallopeptidase 28 [Source:HGNC Symbol;Acc:HGNC:14366]
ENSG00000135218	78.8634	6.00867	0.739497	5.15104e-16	5.23733e-15	948	CD36	CD36 molecule [Source:HGNC Symbol;Acc:HGNC:1663]
ENSG00000168546	39.7461	5.85801	1.01518	4.39969e-09	2.80778e-08	2675	GFRA2	GDNF family receptor alpha 2 [Source:HGNC Symbol;Acc:HGNC:4244]
ENSG00000092529	300.057	5.84877	0.278222	2.97518e-99	2.29964e-97	825	CAPN3	calpain 3 [Source:HGNC Symbol;Acc:HGNC:1480]
ENSG00000103740	177.917	5.76057	0.401595	8.68471e-51	2.78334e-49	23205	ACSBG1	acyl-CoA synthetase bubblegum family member 1 [Source:HGNC Symbol;Acc:HGNC:29567]
ENSG00000144810	1812.37	5.65737	0.135234	0	0	1295	COL8A1	collagen type VIII alpha 1 chain [Source:HGNC Symbol;Acc:HGNC:2215]
ENSG00000089041	606.802	5.54478	0.188748	1.47149e-191	3.16058e-189	5027	P2RX7	purinergic receptor P2X 7 [Source:HGNC Symbol;Acc:HGNC:8537]
ENSG00000111341	2148.08	5.52622	0.114439	0	0	4256	MGP	matrix Gla protein [Source:HGNC Symbol;Acc:HGNC:7060]
ENSG00000109846	112.186	5.45682	0.439703	4.835e-36	1.09427e-34	1410	CRYAB	crystallin alpha B [Source:HGNC Symbol;Acc:HGNC:2389]
ENSG00000101198	51.3854	5.37074	0.667423	1.44902e-16	1.51042e-15	128414	NKAIN4	sodium/potassium transporting ATPase interacting 4 [Source:HGNC Symbol;Acc:HGNC:16191]
ENSG00000275620	69.9399	5.3679	0.537865	1.05953e-23	1.57157e-22	100192386	FLJ16779	uncharacterized LOC100192386 [Source:NCBI gene (formerly Entrezgene);Acc:100192386]
ENSG00000146197	1295.34	5.29178	0.12966	0	0	222663	SCUBE3	signal peptide, CUB domain and EGF like domain containing 3 [Source:HGNC Symbol;Acc:HGNC:13655]
ENSG00000185585	6009.23	5.26116	0.0986699	0	0	169611	OLFML2A	olfactomedin like 2A [Source:HGNC Symbol;Acc:HGNC:27270]
ENSG00000134827	474.224	5.25719	0.211972	2.32385e-138	2.82121e-136	6947	TCN1	transcobalamin 1 [Source:HGNC Symbol;Acc:HGNC:11652]
ENSG00000106278	2003.21	5.24021	0.121305	0	0	5803	PTPRZ1	protein tyrosine phosphatase receptor type Z1 [Source:HGNC Symbol;Acc:HGNC:9685]
ENSG00000169271	34.1245	5.21323	0.738575	7.89166e-13	6.73096e-12	8988	HSPB3	heat shock protein family B (small) member 3 [Source:HGNC Symbol;Acc:HGNC:5248]
ENSG00000166106	1021.72	5.17804	0.152221	2.03635e-254	7.22033e-252	170689	ADAMTS15	ADAM metallopeptidase with thrombospondin type 1 motif 15 [Source:HGNC Symbol;Acc:HGNC:16305]
ENSG00000102996	5227.51	5.13762	0.0879615	0	0	4324	MMP15	matrix metallopeptidase 15 [Source:HGNC Symbol;Acc:HGNC:7161]
ENSG00000187955	136.295	5.04796	0.356001	1.47317e-46	4.30165e-45	7373	COL14A1	collagen type XIV alpha 1 chain [Source:HGNC Symbol;Acc:HGNC:2191]
ENSG00000106772	295.325	4.95283	0.515515	4.30873e-24	6.48573e-23	158471	PRUNE2	prune homolog 2 with BCH domain [Source:HGNC Symbol;Acc:HGNC:25209]
ENSG00000169436	39.7386	4.92812	0.621677	5.55938e-16	5.64993e-15	169044	COL22A1	collagen type XXII alpha 1 chain [Source:HGNC Symbol;Acc:HGNC:22989]
ENSG00000092068	259.025	4.87041	0.259135	7.71857e-79	4.365e-77	23428	SLC7A8	solute carrier family 7 member 8 [Source:HGNC Symbol;Acc:HGNC:11066]
ENSG00000079931	3775.78	4.80673	0.0784401	0	0	26002	MOXD1	monooxygenase DBH like 1 [Source:HGNC Symbol;Acc:HGNC:21063]
ENSG00000163803	61.6927	4.69759	0.4802	1.81911e-23	2.67162e-22	151056	PLB1	phospholipase B1 [Source:HGNC Symbol;Acc:HGNC:30041]
ENSG00000124749	79.0516	4.68771	0.444098	1.01087e-26	1.67141e-25	81578	COL21A1	collagen type XXI alpha 1 chain [Source:HGNC Symbol;Acc:HGNC:17025]
ENSG00000071909	44.1642	4.60472	0.583693	1.77904e-15	1.7749e-14	140469	MYO3B	myosin IIIB [Source:HGNC Symbol;Acc:HGNC:15576]
ENSG00000146090	38.8083	4.52788	0.60055	5.68445e-15	5.5401e-14	255426	RASGEF1C	RasGEF domain family member 1C [Source:HGNC Symbol;Acc:HGNC:27400]
ENSG00000184545	87.742	4.52684	0.388979	1.94502e-32	3.94264e-31	1850	DUSP8	dual specificity phosphatase 8 [Source:HGNC Symbol;Acc:HGNC:3074]
ENSG00000151320	316.472	4.50733	0.245172	1.12057e-76	6.09032e-75	9472	AKAP6	A-kinase anchoring protein 6 [Source:HGNC Symbol;Acc:HGNC:376]
ENSG00000104081	632.336	4.50195	0.173596	5.68113e-150	7.93156e-148	90427	BMF	Bcl2 modifying factor [Source:HGNC Symbol;Acc:HGNC:24132]
ENSG00000185565	1069.9	4.47106	0.146189	1.09301e-205	2.71286e-203	4045	LSAMP	limbic system associated membrane protein [Source:HGNC Symbol;Acc:HGNC:6705]
ENSG00000147027	987.366	4.42263	0.129292	2.27221e-255	8.18656e-253	83604	TMEM47	transmembrane protein 47 [Source:HGNC Symbol;Acc:HGNC:18515]
ENSG00000164106	67.9638	4.36152	0.468814	4.91966e-22	6.7753e-21	11341	SCRG1	stimulator of chondrogenesis 1 [Source:HGNC Symbol;Acc:HGNC:17036]
ENSG00000198121	214.001	4.35753	0.23828	5.12055e-75	2.7105e-73	1902	LPAR1	lysophosphatidic acid receptor 1 [Source:HGNC Symbol;Acc:HGNC:3166]
ENSG00000112137	153.065	4.35679	0.322886	1.96428e-43	5.33147e-42	221692	PHACTR1	phosphatase and actin regulator 1 [Source:HGNC Symbol;Acc:HGNC:20990]
ENSG00000229537	44.3201	4.35306	0.532648	9.63123e-17	1.01626e-15	105378769	LINC01739	long intergenic non-protein coding RNA 1739 [Source:HGNC Symbol;Acc:HGNC:52527]
ENSG00000110076	41.865	4.32649	0.843173	1.3892e-10	1.00492e-09	9379	NRXN2	neurexin 2 [Source:HGNC Symbol;Acc:HGNC:8009]
ENSG00000129946	425.105	4.31176	0.181383	3.14771e-125	3.28567e-123	25759	SHC2	SHC adaptor protein 2 [Source:HGNC Symbol;Acc:HGNC:29869]
ENSG00000126860	63.9503	4.30875	0.43986	2.88114e-24	4.37815e-23	2123	EVI2A	ecotropic viral integration site 2A [Source:HGNC Symbol;Acc:HGNC:3499]
ENSG00000140479	331.66	4.29527	0.229568	2.94463e-79	1.67799e-77	5046	PCSK6	proprotein convertase subtilisin/kexin type 6 [Source:HGNC Symbol;Acc:HGNC:8569]
ENSG00000227051	335.85	4.27581	0.207808	4.61756e-94	3.31663e-92	56967	C14orf132	chromosome 14 open reading frame 132 [Source:HGNC Symbol;Acc:HGNC:20346]
ENSG00000136235	7936.01	4.24738	0.0618274	0	0	10457	GPNMB	glycoprotein nmb [Source:HGNC Symbol;Acc:HGNC:4462]
ENSG00000108556	53.0141	4.18323	0.460125	1.24655e-20	1.59847e-19	1145	CHRNE	cholinergic receptor nicotinic epsilon subunit [Source:HGNC Symbol;Acc:HGNC:1966]
ENSG00000164125	457.532	4.18212	0.167552	1.31329e-137	1.56044e-135	51313	GASK1B	golgi associated kinase 1B [Source:HGNC Symbol;Acc:HGNC:25312]
ENSG00000064205	38.5926	4.16953	0.537158	1.67326e-15	1.67236e-14	8839	CCN5	cellular communication network factor 5 [Source:HGNC Symbol;Acc:HGNC:12770]
ENSG00000081189	1488.7	4.14501	0.11053	0	0	4208	MEF2C	myocyte enhancer factor 2C [Source:HGNC Symbol;Acc:HGNC:6996]
ENSG00000198597	745.337	4.14297	0.140309	2.22352e-192	4.82224e-190	9745	ZNF536	zinc finger protein 536 [Source:HGNC Symbol;Acc:HGNC:29025]
ENSG00000162745	79.7632	4.09065	0.381162	8.36494e-28	1.44625e-26	25903	OLFML2B	olfactomedin like 2B [Source:HGNC Symbol;Acc:HGNC:24558]
ENSG00000125931	91.7107	4.06913	0.348619	1.07054e-32	2.1899e-31	4435	CITED1	Cbp/p300 interacting transactivator with Glu/Asp rich carboxy-terminal domain 1 [Source:HGNC Symbol;Acc:HGNC:1986]
ENSG00000169302	37.9345	4.05129	0.566261	5.6258e-14	5.15671e-13	202374	STK32A	serine/threonine kinase 32A [Source:HGNC Symbol;Acc:HGNC:28317]
ENSG00000064300	5649.54	4.04675	0.0763164	0	0	4804	NGFR	nerve growth factor receptor [Source:HGNC Symbol;Acc:HGNC:7809]
ENSG00000107611	370.091	4.04651	0.50421	3.12241e-17	3.37928e-16	8029	CUBN	cubilin [Source:HGNC Symbol;Acc:HGNC:2548]
ENSG00000265972	1880.4	4.03834	0.244114	1.20541e-62	5.09969e-61	10628	TXNIP	thioredoxin interacting protein [Source:HGNC Symbol;Acc:HGNC:16952]
ENSG00000177807	46.6417	4.03743	0.507694	1.7279e-16	1.79358e-15	3766	KCNJ10	potassium inwardly rectifying channel subfamily J member 10 [Source:HGNC Symbol;Acc:HGNC:6256]
ENSG00000075223	5935.51	3.98783	0.082755	0	0	10512	SEMA3C	semaphorin 3C [Source:HGNC Symbol;Acc:HGNC:10725]
ENSG00000256043	103.01	3.96075	0.337227	6.97368e-33	1.43972e-31	1519	CTSO	cathepsin O [Source:HGNC Symbol;Acc:HGNC:2542]
ENSG00000104059	82.8132	3.95146	0.407166	8.00629e-24	1.19389e-22	23359	FAM189A1	family with sequence similarity 189 member A1 [Source:HGNC Symbol;Acc:HGNC:29075]
ENSG00000138639	323.845	3.93259	0.227245	5.25192e-69	2.52295e-67	83478	ARHGAP24	Rho GTPase activating protein 24 [Source:HGNC Symbol;Acc:HGNC:25361]
ENSG00000078804	1300.59	3.92429	0.100485	0	0	58476	TP53INP2	tumor protein p53 inducible nuclear protein 2 [Source:HGNC Symbol;Acc:HGNC:16104]
ENSG00000049089	1420.13	3.90829	0.117158	4.25551e-244	1.37768e-241	1298	COL9A2	collagen type IX alpha 2 chain [Source:HGNC Symbol;Acc:HGNC:2218]
ENSG00000174521	48.4452	3.87864	0.441693	1.68525e-19	2.03818e-18	148014	TTC9B	tetratricopeptide repeat domain 9B [Source:HGNC Symbol;Acc:HGNC:26395]
ENSG00000048052	413.022	3.84733	0.15832	9.94593e-132	1.11086e-129	9734	HDAC9	histone deacetylase 9 [Source:HGNC Symbol;Acc:HGNC:14065]
ENSG00000280165	149.315	3.79343	0.259166	1.78794e-49	5.52408e-48	64881	PCDH20	protocadherin 20 [Source:HGNC Symbol;Acc:HGNC:14257]
ENSG00000172061	122.122	3.75847	0.299126	5.78916e-37	1.34009e-35	131578	LRRC15	leucine rich repeat containing 15 [Source:HGNC Symbol;Acc:HGNC:20818]
ENSG00000086205	192.643	3.73923	0.228946	2.24128e-60	9.08633e-59	2346	FOLH1	folate hydrolase 1 [Source:HGNC Symbol;Acc:HGNC:3788]
ENSG00000150893	2815.35	3.7269	0.0827888	0	0	341640	FREM2	FRAS1 related extracellular matrix 2 [Source:HGNC Symbol;Acc:HGNC:25396]
ENSG00000005471	247.649	3.72612	0.201377	6.67478e-77	3.65444e-75	5244	ABCB4	ATP binding cassette subfamily B member 4 [Source:HGNC Symbol;Acc:HGNC:45]
ENSG00000124159	56.8719	3.72097	0.410752	1.26793e-20	1.62402e-19	8785	MATN4	matrilin 4 [Source:HGNC Symbol;Acc:HGNC:6910]
ENSG00000170381	434.585	3.71327	0.186612	9.0123e-89	5.95612e-87	9723	SEMA3E	semaphorin 3E [Source:HGNC Symbol;Acc:HGNC:10727]
ENSG00000244242	197.011	3.69334	0.241778	4.34497e-54	1.48634e-52	402778	IFITM10	interferon induced transmembrane protein 10 [Source:HGNC Symbol;Acc:HGNC:40022]
ENSG00000188783	174.898	3.69333	0.245846	2.90345e-52	9.59426e-51	5549	PRELP	proline and arginine rich end leucine rich repeat protein [Source:HGNC Symbol;Acc:HGNC:9357]
ENSG00000183111	339.435	3.66979	0.172435	3.50149e-101	2.77363e-99	389337	ARHGEF37	Rho guanine nucleotide exchange factor 37 [Source:HGNC Symbol;Acc:HGNC:34430]
ENSG00000164418	1310.34	3.63518	0.100156	6.81754e-290	3.17271e-287	2898	GRIK2	glutamate ionotropic receptor kainate type subunit 2 [Source:HGNC Symbol;Acc:HGNC:4580]
ENSG00000099139	313.385	3.63295	0.186058	5.5286e-86	3.53862e-84	5125	PCSK5	proprotein convertase subtilisin/kexin type 5 [Source:HGNC Symbol;Acc:HGNC:8747]
ENSG00000149295	177.923	3.6201	0.220749	3.29384e-61	1.35753e-59	1813	DRD2	dopamine receptor D2 [Source:HGNC Symbol;Acc:HGNC:3023]
ENSG00000173406	46.8379	3.58655	0.48562	1.58512e-14	1.5061e-13	1600	DAB1	DAB adaptor protein 1 [Source:HGNC Symbol;Acc:HGNC:2661]
ENSG00000123560	5394.42	3.58221	0.0634697	0	0	5354	PLP1	proteolipid protein 1 [Source:HGNC Symbol;Acc:HGNC:9086]
ENSG00000109047	40.8137	3.58141	0.484732	1.09542e-14	1.05155e-13	5957	RCVRN	recoverin [Source:HGNC Symbol;Acc:HGNC:9937]
ENSG00000170017	1375.04	3.57714	0.101174	4.47827e-274	1.78635e-271	214	ALCAM	activated leukocyte cell adhesion molecule [Source:HGNC Symbol;Acc:HGNC:400]
ENSG00000080573	716.914	3.57318	0.129469	1.08027e-169	1.85624e-167	50509	COL5A3	collagen type V alpha 3 chain [Source:HGNC Symbol;Acc:HGNC:14864]
ENSG00000137460	545.789	3.56837	0.145749	1.05007e-132	1.19069e-130	85462	FHDC1	FH2 domain containing 1 [Source:HGNC Symbol;Acc:HGNC:29363]
ENSG00000114166	1943.27	3.5539	0.0908826	0	0	8850	KAT2B	lysine acetyltransferase 2B [Source:HGNC Symbol;Acc:HGNC:8638]
ENSG00000240038	41.3547	3.54806	0.489839	6.16763e-14	5.63717e-13	280	AMY2B	amylase alpha 2B [Source:HGNC Symbol;Acc:HGNC:478]
ENSG00000006128	56.6408	3.53879	0.421298	6.49833e-18	7.26889e-17	6863	TAC1	tachykinin precursor 1 [Source:HGNC Symbol;Acc:HGNC:11517]
ENSG00000218336	5826.98	3.49574	0.0670514	0	0	55714	TENM3	teneurin transmembrane protein 3 [Source:HGNC Symbol;Acc:HGNC:29944]
ENSG00000152689	158.451	3.47798	0.267014	1.53244e-39	3.79087e-38	25780	RASGRP3	RAS guanyl releasing protein 3 [Source:HGNC Symbol;Acc:HGNC:14545]
ENSG00000143669	1729.94	3.47619	0.119065	6.7207e-190	1.42978e-187	1130	LYST	lysosomal trafficking regulator [Source:HGNC Symbol;Acc:HGNC:1968]
ENSG00000140379	49.1187	3.46962	0.48418	3.36633e-14	3.128e-13	597	BCL2A1	BCL2 related protein A1 [Source:HGNC Symbol;Acc:HGNC:991]
ENSG00000175785	56.3269	3.45091	0.395493	3.96825e-19	4.70004e-18	145270	PRIMA1	proline rich membrane anchor 1 [Source:HGNC Symbol;Acc:HGNC:18319]
ENSG00000165434	399.075	3.45067	0.170059	1.61738e-92	1.14696e-90	283209	PGM2L1	phosphoglucomutase 2 like 1 [Source:HGNC Symbol;Acc:HGNC:20898]
ENSG00000196376	1006.19	3.44832	0.10916	2.28396e-220	6.14688e-218	222553	SLC35F1	solute carrier family 35 member F1 [Source:HGNC Symbol;Acc:HGNC:21483]
ENSG00000187140	2070.3	3.383	0.098271	5.95227e-261	2.1797e-258	27022	FOXD3	forkhead box D3 [Source:HGNC Symbol;Acc:HGNC:3804]
ENSG00000184985	157.556	3.37828	0.292193	6.78684e-32	1.35725e-30	57537	SORCS2	sortilin related VPS10 domain containing receptor 2 [Source:HGNC Symbol;Acc:HGNC:16698]
ENSG00000084636	3484.22	3.37732	0.0886253	0	0	1307	COL16A1	collagen type XVI alpha 1 chain [Source:HGNC Symbol;Acc:HGNC:2193]
ENSG00000113163	2802.79	3.3609	0.0857462	0	0	10087	CERT1	ceramide transporter 1 [Source:HGNC Symbol;Acc:HGNC:2205]
ENSG00000070731	107.769	3.35781	0.284263	5.07529e-33	1.05364e-31	10610	ST6GALNAC2	ST6 N-acetylgalactosaminide alpha-2,6-sialyltransferase 2 [Source:HGNC Symbol;Acc:HGNC:10867]
ENSG00000163536	33.1193	3.34017	0.604731	8.88697e-10	6.02663e-09	5274	SERPINI1	serpin family I member 1 [Source:HGNC Symbol;Acc:HGNC:8943]
ENSG00000100505	897.464	3.31345	0.111641	1.10483e-194	2.44352e-192	114088	TRIM9	tripartite motif containing 9 [Source:HGNC Symbol;Acc:HGNC:16288]
ENSG00000169851	1155.89	3.30957	0.0986746	5.94539e-248	1.98221e-245	5099	PCDH7	protocadherin 7 [Source:HGNC Symbol;Acc:HGNC:8659]
ENSG00000177606	5699.96	3.30522	0.102472	4.28914e-229	1.2443e-226	3725	JUN	Jun proto-oncogene, AP-1 transcription factor subunit [Source:HGNC Symbol;Acc:HGNC:6204]
ENSG00000100399	85.9533	3.29506	0.32322	2.00896e-25	3.16475e-24	150356	CHADL	chondroadherin like [Source:HGNC Symbol;Acc:HGNC:25165]
ENSG00000126500	295.361	3.28352	0.174102	2.20519e-80	1.28951e-78	23769	FLRT1	fibronectin leucine rich transmembrane protein 1 [Source:HGNC Symbol;Acc:HGNC:3760]
ENSG00000149212	717.219	3.28263	0.125601	1.68345e-152	2.44188e-150	143686	SESN3	sestrin 3 [Source:HGNC Symbol;Acc:HGNC:23060]
ENSG00000157766	635.9	3.25872	0.356039	2.90461e-21	3.85292e-20	176	ACAN	aggrecan [Source:HGNC Symbol;Acc:HGNC:319]
ENSG00000198598	2325.59	3.25304	0.0790886	0	0	4326	MMP17	matrix metallopeptidase 17 [Source:HGNC Symbol;Acc:HGNC:7163]
ENSG00000205213	630.955	3.22846	0.12457	1.22719e-148	1.69215e-146	55366	LGR4	leucine rich repeat containing G protein-coupled receptor 4 [Source:HGNC Symbol;Acc:HGNC:13299]
ENSG00000164171	2267.3	3.21279	0.0829745	0	0	3673	ITGA2	integrin subunit alpha 2 [Source:HGNC Symbol;Acc:HGNC:6137]
ENSG00000242808	52.3732	3.18959	0.439154	1.0726e-14	1.03052e-13	347689	SOX2-OT	SOX2 overlapping transcript [Source:HGNC Symbol;Acc:HGNC:20209]
ENSG00000204262	11854.4	3.17556	0.0571247	0	0	1290	COL5A2	collagen type V alpha 2 chain [Source:HGNC Symbol;Acc:HGNC:2210]
ENSG00000246985	92.172	3.14719	0.330435	3.26572e-22	4.53104e-21	144481	SOCS2-AS1	SOCS2 antisense RNA 1 [Source:HGNC Symbol;Acc:HGNC:27054]
ENSG00000164929	93.5823	3.14706	0.338597	1.32642e-21	1.78923e-20	79870	BAALC	BAALC binder of MAP3K1 and KLF4 [Source:HGNC Symbol;Acc:HGNC:14333]
ENSG00000151150	1869.06	3.14578	0.0977902	7.43459e-229	2.12915e-226	288	ANK3	ankyrin 3 [Source:HGNC Symbol;Acc:HGNC:494]
ENSG00000231999	36.3897	3.13576	0.498813	1.74026e-11	1.35213e-10	400761	LRRC8C-DT	LRRC8C divergent transcript [Source:HGNC Symbol;Acc:HGNC:53731]
ENSG00000168702	134.001	3.12787	0.273369	4.59275e-31	8.92887e-30	53353	LRP1B	LDL receptor related protein 1B [Source:HGNC Symbol;Acc:HGNC:6693]
ENSG00000180573	195.247	3.12425	0.21447	2.17768e-49	6.70966e-48	8334	H2AC6	H2A clustered histone 6 [Source:HGNC Symbol;Acc:HGNC:4733]
ENSG00000182050	35.7523	3.12231	0.674726	7.12572e-08	4.02769e-07	25834	MGAT4C	MGAT4 family member C [Source:HGNC Symbol;Acc:HGNC:30871]
ENSG00000254860	50.48	3.11391	0.372178	4.39811e-18	4.96939e-17	493900	TMEM9B-AS1	TMEM9B antisense RNA 1 [Source:HGNC Symbol;Acc:HGNC:19230]
ENSG00000167995	112.526	3.11138	0.264785	7.11684e-33	1.46792e-31	7439	BEST1	bestrophin 1 [Source:HGNC Symbol;Acc:HGNC:12703]
ENSG00000038427	312.931	3.10408	0.201966	3.53838e-55	1.24866e-53	1462	VCAN	versican [Source:HGNC Symbol;Acc:HGNC:2464]
ENSG00000047662	74.0576	3.09359	0.325822	2.06294e-22	2.88013e-21	27146	FAM184B	family with sequence similarity 184 member B [Source:HGNC Symbol;Acc:HGNC:29235]
ENSG00000235863	50.4798	3.08249	0.405436	4.54131e-15	4.43955e-14	8705	B3GALT4	beta-1,3-galactosyltransferase 4 [Source:HGNC Symbol;Acc:HGNC:919]
ENSG00000130635	2441.03	3.07977	0.08791	9.06497e-271	3.55251e-268	1289	COL5A1	collagen type V alpha 1 chain [Source:HGNC Symbol;Acc:HGNC:2209]
ENSG00000113578	242.675	3.04167	0.209708	1.40251e-49	4.34524e-48	2246	FGF1	fibroblast growth factor 1 [Source:HGNC Symbol;Acc:HGNC:3665]
ENSG00000171502	38.3745	3.03963	0.481101	1.97167e-11	1.52504e-10	255631	COL24A1	collagen type XXIV alpha 1 chain [Source:HGNC Symbol;Acc:HGNC:20821]
ENSG00000274750	55.7949	3.03629	0.389169	3.71117e-16	3.80102e-15	8353	H3C6	H3 clustered histone 6 [Source:HGNC Symbol;Acc:HGNC:4769]
ENSG00000065534	487.247	3.0251	0.142706	1.74979e-101	1.41108e-99	4638	MYLK	myosin light chain kinase [Source:HGNC Symbol;Acc:HGNC:7590]
ENSG00000103489	895.259	3.00023	0.111406	7.06512e-161	1.07361e-158	64131	XYLT1	xylosyltransferase 1 [Source:HGNC Symbol;Acc:HGNC:15516]
ENSG00000090530	238.026	2.99787	0.215948	8.01399e-45	2.24331e-43	55214	P3H2	prolyl 3-hydroxylase 2 [Source:HGNC Symbol;Acc:HGNC:19317]
ENSG00000077092	78.3693	2.99118	0.348301	4.20313e-19	4.97296e-18	5915	RARB	retinoic acid receptor beta [Source:HGNC Symbol;Acc:HGNC:9865]
ENSG00000170745	526.556	2.98211	0.144281	1.9302e-95	1.40446e-93	3790	KCNS3	potassium voltage-gated channel modifier subfamily S member 3 [Source:HGNC Symbol;Acc:HGNC:6302]
ENSG00000181409	555.707	2.97618	0.141417	2.60836e-99	2.02311e-97	9625	AATK	apoptosis associated tyrosine kinase [Source:HGNC Symbol;Acc:HGNC:21]
ENSG00000116991	1395.34	2.96696	0.104544	5.28494e-178	9.92059e-176	57568	SIPA1L2	signal induced proliferation associated 1 like 2 [Source:HGNC Symbol;Acc:HGNC:23800]
ENSG00000157111	154.911	2.95986	0.237028	7.49406e-37	1.73115e-35	134285	TMEM171	transmembrane protein 171 [Source:HGNC Symbol;Acc:HGNC:27031]
ENSG00000204252	601.189	2.95121	0.136773	6.3073e-104	5.17987e-102	3111	HLA-DOA	major histocompatibility complex, class II, DO alpha [Source:HGNC Symbol;Acc:HGNC:4936]
ENSG00000167617	210.365	2.95032	0.192011	2.0474e-54	7.07968e-53	148170	CDC42EP5	CDC42 effector protein 5 [Source:HGNC Symbol;Acc:HGNC:17408]
ENSG00000203811	101.903	2.94307	0.279018	3.59283e-27	6.05253e-26	126961	H3C14	H3 clustered histone 14 [Source:HGNC Symbol;Acc:HGNC:20503]
ENSG00000112276	551.555	2.94267	0.129426	3.16479e-115	2.98292e-113	11149	BVES	blood vessel epicardial substance [Source:HGNC Symbol;Acc:HGNC:1152]
ENSG00000138798	56.514	2.94007	0.49744	1.61629e-10	1.16279e-09	1950	EGF	epidermal growth factor [Source:HGNC Symbol;Acc:HGNC:3229]
ENSG00000146592	184.825	2.93862	0.694673	1.37276e-06	6.76327e-06	9586	CREB5	cAMP responsive element binding protein 5 [Source:HGNC Symbol;Acc:HGNC:16844]
ENSG00000168621	500.283	2.93423	0.154287	2.51096e-81	1.48779e-79	2668	GDNF	glial cell derived neurotrophic factor [Source:HGNC Symbol;Acc:HGNC:4232]
ENSG00000168952	84.2341	2.93352	0.314517	1.81874e-21	2.43421e-20	29091	STXBP6	syntaxin binding protein 6 [Source:HGNC Symbol;Acc:HGNC:19666]
ENSG00000134955	891.926	2.92621	0.107794	1.09069e-163	1.70377e-161	219855	SLC37A2	solute carrier family 37 member 2 [Source:HGNC Symbol;Acc:HGNC:20644]
ENSG00000165323	254.377	2.92481	0.543694	3.73205e-09	2.39766e-08	120114	FAT3	FAT atypical cadherin 3 [Source:HGNC Symbol;Acc:HGNC:23112]
ENSG00000148942	74.5581	2.92311	0.377671	3.88769e-16	3.97998e-15	159963	SLC5A12	solute carrier family 5 member 12 [Source:HGNC Symbol;Acc:HGNC:28750]
ENSG00000112139	125.062	2.90689	0.271738	6.49863e-28	1.12882e-26	266727	MDGA1	MAM domain containing glycosylphosphatidylinositol anchor 1 [Source:HGNC Symbol;Acc:HGNC:19267]
ENSG00000177453	76.2793	2.90072	0.335983	2.89964e-19	3.4582e-18	167359	NIM1K	NIM1 serine/threonine protein kinase [Source:HGNC Symbol;Acc:HGNC:28646]
ENSG00000250305	42.1259	2.89919	0.432846	1.51265e-12	1.2698e-11	57604	TRMT9B	tRNA methyltransferase 9B (putative) [Source:HGNC Symbol;Acc:HGNC:26725]
ENSG00000135205	32.2521	2.88401	0.524154	2.87782e-09	1.87037e-08	57639	CCDC146	coiled-coil domain containing 146 [Source:HGNC Symbol;Acc:HGNC:29296]
ENSG00000060718	37.3043	2.8813	0.523526	4.65232e-09	2.95742e-08	1301	COL11A1	collagen type XI alpha 1 chain [Source:HGNC Symbol;Acc:HGNC:2186]
ENSG00000135842	2348.11	2.88038	0.0742485	0	0	116496	NIBAN1	niban apoptosis regulator 1 [Source:HGNC Symbol;Acc:HGNC:16784]
ENSG00000160862	570.669	2.85883	0.1257	1.07298e-115	1.01992e-113	563	AZGP1	alpha-2-glycoprotein 1, zinc-binding [Source:HGNC Symbol;Acc:HGNC:910]
ENSG00000243244	432.532	2.85382	0.147316	7.5533e-85	4.72621e-83	11037	STON1	stonin 1 [Source:HGNC Symbol;Acc:HGNC:17003]
ENSG00000179954	310.776	2.85214	0.19226	4.29591e-51	1.38473e-49	284297	SSC5D	scavenger receptor cysteine rich family member with 5 domains [Source:HGNC Symbol;Acc:HGNC:26641]
ENSG00000261115	310.175	2.85102	0.164291	1.12887e-68	5.39973e-67	100507421	TMEM178B	transmembrane protein 178B [Source:HGNC Symbol;Acc:HGNC:44112]
ENSG00000132561	79.4961	2.83281	0.361785	1.7665e-16	1.83194e-15	4147	MATN2	matrilin 2 [Source:HGNC Symbol;Acc:HGNC:6908]
ENSG00000111728	44.047	2.81365	0.433595	7.98933e-12	6.38061e-11	6489	ST8SIA1	ST8 alpha-N-acetyl-neuraminide alpha-2,8-sialyltransferase 1 [Source:HGNC Symbol;Acc:HGNC:10869]
ENSG00000206538	101.218	2.79849	0.300137	6.20547e-22	8.50938e-21	389136	VGLL3	vestigial like family member 3 [Source:HGNC Symbol;Acc:HGNC:24327]
ENSG00000075426	1183.3	2.78038	0.0976333	4.09806e-179	7.89158e-177	2355	FOSL2	FOS like 2, AP-1 transcription factor subunit [Source:HGNC Symbol;Acc:HGNC:3798]
ENSG00000171094	54.7092	2.77351	0.461332	1.87733e-10	1.34453e-09	238	ALK	ALK receptor tyrosine kinase [Source:HGNC Symbol;Acc:HGNC:427]
ENSG00000198870	58.6027	2.76571	0.396612	1.45491e-13	1.29844e-12	169436	STKLD1	serine/threonine kinase like domain containing 1 [Source:HGNC Symbol;Acc:HGNC:28669]
ENSG00000196569	302.588	2.76308	0.241871	3.35522e-31	6.55147e-30	3908	LAMA2	laminin subunit alpha 2 [Source:HGNC Symbol;Acc:HGNC:6482]
ENSG00000204248	856.757	2.762	0.109307	7.0993e-142	9.06196e-140	1302	COL11A2	collagen type XI alpha 2 chain [Source:HGNC Symbol;Acc:HGNC:2187]
ENSG00000164120	49.8896	2.76164	0.480764	8.90884e-10	6.03962e-09	3248	HPGD	15-hydroxyprostaglandin dehydrogenase [Source:HGNC Symbol;Acc:HGNC:5154]
ENSG00000187634	251.484	2.75955	0.180206	3.94644e-54	1.35416e-52	148398	SAMD11	sterile alpha motif domain containing 11 [Source:HGNC Symbol;Acc:HGNC:28706]
ENSG00000121440	559.315	2.75883	0.136054	2.13231e-92	1.50733e-90	23024	PDZRN3	PDZ domain containing ring finger 3 [Source:HGNC Symbol;Acc:HGNC:17704]
ENSG00000108309	80.2117	2.74023	0.342421	1.00347e-16	1.05733e-15	10900	RUNDC3A	RUN domain containing 3A [Source:HGNC Symbol;Acc:HGNC:16984]
ENSG00000242252	33.3308	2.72975	0.464336	3.58342e-10	2.49366e-09	632	BGLAP	bone gamma-carboxyglutamate protein [Source:HGNC Symbol;Acc:HGNC:1043]
ENSG00000181350	42.2559	2.72732	0.418339	6.56971e-12	5.27513e-11	388341	LRRC75A	leucine rich repeat containing 75A [Source:HGNC Symbol;Acc:HGNC:32403]
ENSG00000158887	589.964	2.71973	0.120706	1.21709e-113	1.11424e-111	4359	MPZ	myelin protein zero [Source:HGNC Symbol;Acc:HGNC:7225]
ENSG00000105696	379.711	2.70742	0.143182	1.06653e-80	6.28604e-79	25789	TMEM59L	transmembrane protein 59 like [Source:HGNC Symbol;Acc:HGNC:13237]
ENSG00000175899	908.661	2.70664	0.112969	2.50644e-128	2.66614e-126	2	A2M	alpha-2-macroglobulin [Source:HGNC Symbol;Acc:HGNC:7]
ENSG00000166833	173.726	2.70303	0.255894	1.5966e-27	2.72667e-26	89797	NAV2	neuron navigator 2 [Source:HGNC Symbol;Acc:HGNC:15997]
ENSG00000185352	73.9502	2.70245	0.324965	1.57952e-17	1.73639e-16	266722	HS6ST3	heparan sulfate 6-O-sulfotransferase 3 [Source:HGNC Symbol;Acc:HGNC:19134]
ENSG00000099840	34.9578	2.67124	0.455379	4.16463e-10	2.88285e-09	113177	IZUMO4	IZUMO family member 4 [Source:HGNC Symbol;Acc:HGNC:26950]
ENSG00000121743	498.458	2.67006	0.125992	1.83551e-100	1.44372e-98	2700	GJA3	gap junction protein alpha 3 [Source:HGNC Symbol;Acc:HGNC:4277]
ENSG00000150551	965.993	2.66678	0.103772	7.25995e-147	9.88859e-145	116372	LYPD1	LY6/PLAUR domain containing 1 [Source:HGNC Symbol;Acc:HGNC:28431]
ENSG00000184678	192.302	2.66464	0.202867	1.36151e-40	3.45999e-39	8349	H2BC21	H2B clustered histone 21 [Source:HGNC Symbol;Acc:HGNC:4760]
ENSG00000137877	212.277	2.65947	0.202161	1.39284e-40	3.53559e-39	51332	SPTBN5	spectrin beta, non-erythrocytic 5 [Source:HGNC Symbol;Acc:HGNC:15680]
ENSG00000134986	1373.7	2.65542	0.0971927	1.95056e-165	3.13466e-163	9315	NREP	neuronal regeneration related protein [Source:HGNC Symbol;Acc:HGNC:16834]
ENSG00000135549	36.2283	2.64788	0.520718	3.23237e-08	1.89464e-07	5570	PKIB	cAMP-dependent protein kinase inhibitor beta [Source:HGNC Symbol;Acc:HGNC:9018]
ENSG00000258754	193.189	2.63713	0.207128	6.02381e-38	1.4376e-36	105369203	LINC01579	long intergenic non-protein coding RNA 1579 [Source:HGNC Symbol;Acc:HGNC:27519]
ENSG00000257743	1006.86	2.61817	0.0937283	1.70546e-172	3.04772e-170	93432	MGAM2	maltase-glucoamylase 2 (putative) [Source:HGNC Symbol;Acc:HGNC:28101]
ENSG00000183044	496.613	2.61738	0.148813	2.64504e-70	1.28725e-68	18	ABAT	4-aminobutyrate aminotransferase [Source:HGNC Symbol;Acc:HGNC:23]
ENSG00000163508	41.547	2.60106	0.425667	1.12273e-10	8.16391e-10	8320	EOMES	eomesodermin [Source:HGNC Symbol;Acc:HGNC:3372]
ENSG00000115461	3184.6	2.59931	0.066059	0	0	3488	IGFBP5	insulin like growth factor binding protein 5 [Source:HGNC Symbol;Acc:HGNC:5474]
ENSG00000165495	348.239	2.59734	0.163669	7.84617e-58	2.93581e-56	63876	PKNOX2	PBX/knotted 1 homeobox 2 [Source:HGNC Symbol;Acc:HGNC:16714]
ENSG00000109458	324.059	2.59701	0.240342	1.64474e-28	2.9275e-27	2549	GAB1	GRB2 associated binding protein 1 [Source:HGNC Symbol;Acc:HGNC:4066]
ENSG00000071991	1417.48	2.58716	0.0867042	4.3561e-197	1.02428e-194	28513	CDH19	cadherin 19 [Source:HGNC Symbol;Acc:HGNC:1758]
ENSG00000144481	326.496	2.58361	0.16404	7.91269e-57	2.89286e-55	79054	TRPM8	transient receptor potential cation channel subfamily M member 8 [Source:HGNC Symbol;Acc:HGNC:17961]
ENSG00000198753	5051.51	2.57829	0.092455	7.63522e-173	1.37545e-170	5365	PLXNB3	plexin B3 [Source:HGNC Symbol;Acc:HGNC:9105]
ENSG00000138735	184.721	2.57674	0.251804	5.08261e-26	8.17389e-25	8654	PDE5A	phosphodiesterase 5A [Source:HGNC Symbol;Acc:HGNC:8784]
ENSG00000123342	201.888	2.57572	0.213892	2.76029e-34	5.92877e-33	4327	MMP19	matrix metallopeptidase 19 [Source:HGNC Symbol;Acc:HGNC:7165]
ENSG00000270882	218.151	2.57176	0.191455	5.77403e-42	1.52459e-40	8370	H4C14	H4 clustered histone 14 [Source:HGNC Symbol;Acc:HGNC:4794]
ENSG00000178573	1917.72	2.57067	0.0886293	8.89335e-186	1.82257e-183	4094	MAF	MAF bZIP transcription factor [Source:HGNC Symbol;Acc:HGNC:6776]
ENSG00000270276	111.293	2.56934	0.280996	6.94984e-21	9.0259e-20	554313	H4C15	H4 clustered histone 15 [Source:HGNC Symbol;Acc:HGNC:29607]
ENSG00000186086	42.2814	2.56266	0.414847	6.68182e-11	4.9637e-10	653149	NBPF6	NBPF member 6 [Source:HGNC Symbol;Acc:HGNC:31988]
ENSG00000178104	1033.6	2.55024	0.109799	2.0387e-120	2.03306e-118	9659	PDE4DIP	phosphodiesterase 4D interacting protein [Source:HGNC Symbol;Acc:HGNC:15580]
ENSG00000206561	55.8757	2.54469	0.359907	1.8975e-13	1.68333e-12	8292	COLQ	collagen like tail subunit of asymmetric acetylcholinesterase [Source:HGNC Symbol;Acc:HGNC:2226]
ENSG00000165475	691.231	2.5404	0.112505	9.75072e-114	8.96344e-112	51084	CRYL1	crystallin lambda 1 [Source:HGNC Symbol;Acc:HGNC:18246]
ENSG00000166311	801.568	2.53817	0.109157	6.9353e-121	6.94712e-119	6609	SMPD1	sphingomyelin phosphodiesterase 1 [Source:HGNC Symbol;Acc:HGNC:11120]
ENSG00000188501	563.192	2.5225	0.120977	3.44181e-97	2.57997e-95	197021	LCTL	lactase like [Source:HGNC Symbol;Acc:HGNC:15583]
ENSG00000153029	337.979	2.51857	0.153984	6.5604e-61	2.6742e-59	3140	MR1	major histocompatibility complex, class I-related [Source:HGNC Symbol;Acc:HGNC:4975]
ENSG00000272196	347.619	2.51474	0.146829	9.4286e-67	4.3159e-65	723790	H2AC19	H2A clustered histone 19 [Source:HGNC Symbol;Acc:HGNC:29668]
ENSG00000095637	291.734	2.51167	0.198739	9.00466e-38	2.13531e-36	10580	SORBS1	sorbin and SH3 domain containing 1 [Source:HGNC Symbol;Acc:HGNC:14565]
ENSG00000171451	361.067	2.50712	0.145288	1.57821e-67	7.34459e-66	92126	DSEL	dermatan sulfate epimerase like [Source:HGNC Symbol;Acc:HGNC:18144]
ENSG00000247271	35.2055	2.49613	0.443128	1.83826e-09	1.21488e-08	729013	ZBED5-AS1	ZBED5 antisense RNA 1 [Source:HGNC Symbol;Acc:HGNC:48646]
ENSG00000160712	855.053	2.49371	0.144483	7.29831e-68	3.42499e-66	3570	IL6R	interleukin 6 receptor [Source:HGNC Symbol;Acc:HGNC:6019]
ENSG00000145675	1062.5	2.48675	0.0995198	4.88577e-139	5.99662e-137	5295	PIK3R1	phosphoinositide-3-kinase regulatory subunit 1 [Source:HGNC Symbol;Acc:HGNC:8979]
ENSG00000134954	2095.48	2.47702	0.0741469	1.15469e-245	3.79315e-243	2113	ETS1	ETS proto-oncogene 1, transcription factor [Source:HGNC Symbol;Acc:HGNC:3488]
ENSG00000075826	235.201	2.47385	0.213381	5.94279e-32	1.19165e-30	25956	SEC31B	SEC31 homolog B, COPII coat complex component [Source:HGNC Symbol;Acc:HGNC:23197]
ENSG00000162944	76.151	2.47016	0.408453	1.19864e-10	8.69045e-10	130132	RFTN2	raftlin family member 2 [Source:HGNC Symbol;Acc:HGNC:26402]
ENSG00000115828	251.366	2.46765	0.179328	7.47757e-44	2.03949e-42	25797	QPCT	glutaminyl-peptide cyclotransferase [Source:HGNC Symbol;Acc:HGNC:9753]
ENSG00000183615	48.9398	2.46309	0.390016	2.86448e-11	2.18908e-10	84734	FAM167B	family with sequence similarity 167 member B [Source:HGNC Symbol;Acc:HGNC:28133]
ENSG00000196787	41.9152	2.45222	0.423326	9.31755e-10	6.30331e-09	8969	H2AC11	H2A clustered histone 11 [Source:HGNC Symbol;Acc:HGNC:4737]
ENSG00000162849	163.953	2.45009	0.274138	2.34789e-20	2.96815e-19	55083	KIF26B	kinesin family member 26B [Source:HGNC Symbol;Acc:HGNC:25484]
ENSG00000114270	792.563	2.44843	0.143114	1.2803e-66	5.80108e-65	1294	COL7A1	collagen type VII alpha 1 chain [Source:HGNC Symbol;Acc:HGNC:2214]
ENSG00000132718	1973.38	2.44335	0.0743303	1.17184e-237	3.63565e-235	23208	SYT11	synaptotagmin 11 [Source:HGNC Symbol;Acc:HGNC:19239]
ENSG00000198948	77.9449	2.44187	0.397391	5.26494e-11	3.95322e-10	9848	MFAP3L	microfibril associated protein 3 like [Source:HGNC Symbol;Acc:HGNC:29083]
ENSG00000120327	121.194	2.43799	0.236646	6.30171e-26	1.00764e-24	56122	PCDHB14	protocadherin beta 14 [Source:HGNC Symbol;Acc:HGNC:8685]
ENSG00000196547	3224.47	2.43792	0.0680437	2.92638e-282	1.30739e-279	4122	MAN2A2	mannosidase alpha class 2A member 2 [Source:HGNC Symbol;Acc:HGNC:6825]
ENSG00000089057	3282.9	2.4359	0.0641862	0	0	9962	SLC23A2	solute carrier family 23 member 2 [Source:HGNC Symbol;Acc:HGNC:10973]
ENSG00000140022	47.4496	2.43544	0.37313	7.58079e-12	6.05866e-11	85439	STON2	stonin 2 [Source:HGNC Symbol;Acc:HGNC:30652]
ENSG00000124225	4837.55	2.42772	0.0642437	0	0	56937	PMEPA1	prostate transmembrane protein, androgen induced 1 [Source:HGNC Symbol;Acc:HGNC:14107]
ENSG00000106479	91.8492	2.41781	0.337213	5.30466e-14	4.87436e-13	643641	ZNF862	zinc finger protein 862 [Source:HGNC Symbol;Acc:HGNC:34519]
ENSG00000197321	3865.34	2.4152	0.0809469	2.52326e-196	5.87131e-194	6840	SVIL	supervillin [Source:HGNC Symbol;Acc:HGNC:11480]
ENSG00000188859	805.966	2.40413	0.105381	5.51492e-116	5.28723e-114	149297	FAM78B	family with sequence similarity 78 member B [Source:HGNC Symbol;Acc:HGNC:13495]
ENSG00000171444	775.785	2.40079	0.145672	4.47149e-62	1.87049e-60	4163	MCC	MCC regulator of WNT signaling pathway [Source:HGNC Symbol;Acc:HGNC:6935]
ENSG00000185532	114.966	2.39875	0.28069	1.37999e-18	1.60219e-17	5592	PRKG1	protein kinase cGMP-dependent 1 [Source:HGNC Symbol;Acc:HGNC:9414]
ENSG00000136960	249.692	2.39823	0.166572	6.95538e-48	2.06883e-46	5168	ENPP2	ectonucleotide pyrophosphatase/phosphodiesterase 2 [Source:HGNC Symbol;Acc:HGNC:3357]
ENSG00000150275	39.2783	2.39149	0.431975	3.76227e-09	2.41568e-08	65217	PCDH15	protocadherin related 15 [Source:HGNC Symbol;Acc:HGNC:14674]
ENSG00000035862	5322.32	2.39086	0.058248	0	0	7077	TIMP2	TIMP metallopeptidase inhibitor 2 [Source:HGNC Symbol;Acc:HGNC:11821]
ENSG00000196735	463.451	2.3872	0.15358	2.45928e-55	8.73375e-54	3117	HLA-DQA1	major histocompatibility complex, class II, DQ alpha 1 [Source:HGNC Symbol;Acc:HGNC:4942]
ENSG00000070371	310.342	2.37732	0.158009	6.03826e-52	1.98649e-50	8218	CLTCL1	clathrin heavy chain like 1 [Source:HGNC Symbol;Acc:HGNC:2093]
ENSG00000124766	1263.36	2.36503	0.0921632	7.48848e-146	1.00166e-143	6659	SOX4	SRY-box transcription factor 4 [Source:HGNC Symbol;Acc:HGNC:11200]
ENSG00000148700	2525.98	2.36389	0.0961236	3.04181e-134	3.53896e-132	120	ADD3	adducin 3 [Source:HGNC Symbol;Acc:HGNC:245]
ENSG00000148848	193.111	2.36267	0.203793	6.29369e-32	1.26088e-30	8038	ADAM12	ADAM metallopeptidase domain 12 [Source:HGNC Symbol;Acc:HGNC:190]
ENSG00000185345	36.6817	2.35613	0.744272	8.81361e-05	0.000345098	5071	PRKN	parkin RBR E3 ubiquitin protein ligase [Source:HGNC Symbol;Acc:HGNC:8607]
ENSG00000143387	459.074	2.3493	0.146261	3.02365e-59	1.18913e-57	1513	CTSK	cathepsin K [Source:HGNC Symbol;Acc:HGNC:2536]
ENSG00000169554	1375.38	2.34698	0.0945061	4.91308e-137	5.77624e-135	9839	ZEB2	zinc finger E-box binding homeobox 2 [Source:HGNC Symbol;Acc:HGNC:14881]
ENSG00000136161	85.4487	2.33894	0.291763	1.00645e-16	1.05947e-15	1102	RCBTB2	RCC1 and BTB domain containing protein 2 [Source:HGNC Symbol;Acc:HGNC:1914]
ENSG00000120885	292.693	2.33337	0.261155	2.68713e-20	3.38742e-19	1191	CLU	clusterin [Source:HGNC Symbol;Acc:HGNC:2095]
ENSG00000114547	125.318	2.3309	0.255081	8.48989e-21	1.09623e-19	152015	ROPN1B	rhophilin associated tail protein 1B [Source:HGNC Symbol;Acc:HGNC:31927]
ENSG00000188177	76.6055	2.32233	0.380595	1.00353e-10	7.33296e-10	376940	ZC3H6	zinc finger CCCH-type containing 6 [Source:HGNC Symbol;Acc:HGNC:24762]
ENSG00000226674	53.1173	2.3223	0.420503	2.31442e-09	1.51834e-08	401014	TEX41	testis expressed 41 [Source:HGNC Symbol;Acc:HGNC:48667]
ENSG00000184524	155.923	2.3205	0.216886	9.50009e-28	1.63871e-26	51286	CEND1	cell cycle exit and neuronal differentiation 1 [Source:HGNC Symbol;Acc:HGNC:24153]
ENSG00000165617	70.6275	2.31589	0.31558	2.70319e-14	2.5223e-13	51339	DACT1	dishevelled binding antagonist of beta catenin 1 [Source:HGNC Symbol;Acc:HGNC:17748]
ENSG00000099282	72.2708	2.31439	0.342463	1.21543e-12	1.02493e-11	23555	TSPAN15	tetraspanin 15 [Source:HGNC Symbol;Acc:HGNC:23298]
ENSG00000119280	1415.12	2.31343	0.0886237	3.99198e-151	5.64386e-149	84886	C1orf198	chromosome 1 open reading frame 198 [Source:HGNC Symbol;Acc:HGNC:25900]
ENSG00000007237	10999.9	2.30075	0.0741557	7.5758e-213	1.94515e-210	8522	GAS7	growth arrest specific 7 [Source:HGNC Symbol;Acc:HGNC:4169]
ENSG00000183401	102.716	2.29999	0.259336	9.84321e-20	1.20349e-18	126075	CCDC159	coiled-coil domain containing 159 [Source:HGNC Symbol;Acc:HGNC:26996]
ENSG00000102755	538.77	2.27952	0.146863	3.39315e-55	1.20311e-53	2321	FLT1	fms related receptor tyrosine kinase 1 [Source:HGNC Symbol;Acc:HGNC:3763]
ENSG00000092969	49.9488	2.27496	0.415952	4.05884e-09	2.59938e-08	7042	TGFB2	transforming growth factor beta 2 [Source:HGNC Symbol;Acc:HGNC:11768]
ENSG00000174080	1528.42	2.26624	0.0792896	1.08098e-180	2.09973e-178	8722	CTSF	cathepsin F [Source:HGNC Symbol;Acc:HGNC:2531]
ENSG00000172638	498.399	2.26114	0.149225	6.2555e-53	2.09813e-51	30008	EFEMP2	EGF containing fibulin extracellular matrix protein 2 [Source:HGNC Symbol;Acc:HGNC:3219]
ENSG00000155324	243.876	2.25386	0.169521	3.40709e-41	8.80876e-40	65983	GRAMD2B	GRAM domain containing 2B [Source:HGNC Symbol;Acc:HGNC:24911]
ENSG00000129226	762.384	2.24842	0.132648	3.30805e-65	1.44609e-63	968	CD68	CD68 molecule [Source:HGNC Symbol;Acc:HGNC:1693]
ENSG00000128683	92.3741	2.24767	0.282615	2.28427e-16	2.36122e-15	2571	GAD1	glutamate decarboxylase 1 [Source:HGNC Symbol;Acc:HGNC:4092]
ENSG00000122863	1360.82	2.23854	0.0926973	6.44234e-130	6.95212e-128	9469	CHST3	carbohydrate sulfotransferase 3 [Source:HGNC Symbol;Acc:HGNC:1971]
ENSG00000255874	178.905	2.23502	0.198138	1.81858e-30	3.46026e-29	283487	PRECSIT	p53 regulated carcinoma associated Stat3 activating long intergenic non-protein coding transcript [Source:HGNC Symbol;Acc:HGNC:27492]
ENSG00000083067	220.542	2.22854	0.233302	6.30824e-23	9.02135e-22	80036	TRPM3	transient receptor potential cation channel subfamily M member 3 [Source:HGNC Symbol;Acc:HGNC:17992]
ENSG00000175938	700.436	2.22574	0.109233	2.83381e-93	2.01597e-91	93129	ORAI3	ORAI calcium release-activated calcium modulator 3 [Source:HGNC Symbol;Acc:HGNC:28185]
ENSG00000197746	16281.3	2.22531	0.0506341	0	0	5660	PSAP	prosaposin [Source:HGNC Symbol;Acc:HGNC:9498]
ENSG00000182179	178.051	2.22302	0.216121	1.39478e-25	2.20813e-24	7318	UBA7	ubiquitin like modifier activating enzyme 7 [Source:HGNC Symbol;Acc:HGNC:12471]
ENSG00000240184	6617.37	2.21371	0.0612191	4.03255e-287	1.83835e-284	5098	PCDHGC3	protocadherin gamma subfamily C, 3 [Source:HGNC Symbol;Acc:HGNC:8716]
ENSG00000137501	332.769	2.2096	0.209461	4.59403e-27	7.66977e-26	54843	SYTL2	synaptotagmin like 2 [Source:HGNC Symbol;Acc:HGNC:15585]
ENSG00000116649	5294.83	2.20934	0.05949	1.16834e-302	5.67354e-300	6723	SRM	spermidine synthase [Source:HGNC Symbol;Acc:HGNC:11296]
ENSG00000137801	20763.5	2.20455	0.0637027	6.83967e-264	2.58957e-261	7057	THBS1	thrombospondin 1 [Source:HGNC Symbol;Acc:HGNC:11785]
ENSG00000164938	152.178	2.20405	0.213782	1.03879e-25	1.65157e-24	94241	TP53INP1	tumor protein p53 inducible nuclear protein 1 [Source:HGNC Symbol;Acc:HGNC:18022]
ENSG00000167964	526.741	2.2006	0.121974	7.01382e-74	3.61835e-72	25837	RAB26	RAB26, member RAS oncogene family [Source:HGNC Symbol;Acc:HGNC:14259]
ENSG00000085063	6677.49	2.19947	0.0637615	1.31109e-261	4.8812e-259	966	CD59	CD59 molecule (CD59 blood group) [Source:HGNC Symbol;Acc:HGNC:1689]
ENSG00000140450	175.17	2.19865	0.202845	2.75861e-28	4.85976e-27	91947	ARRDC4	arrestin domain containing 4 [Source:HGNC Symbol;Acc:HGNC:28087]
ENSG00000171877	657.367	2.19412	0.139845	2.23845e-56	8.05192e-55	84978	FRMD5	FERM domain containing 5 [Source:HGNC Symbol;Acc:HGNC:28214]
ENSG00000137094	150.322	2.19185	0.206901	3.97965e-27	6.67399e-26	25822	DNAJB5	DnaJ heat shock protein family (Hsp40) member B5 [Source:HGNC Symbol;Acc:HGNC:14887]
ENSG00000119227	38.6816	2.18129	0.426762	3.45028e-08	2.01496e-07	80235	PIGZ	phosphatidylinositol glycan anchor biosynthesis class Z [Source:HGNC Symbol;Acc:HGNC:30596]
ENSG00000151692	1328.58	2.17942	0.112506	2.31917e-84	1.43904e-82	9781	RNF144A	ring finger protein 144A [Source:HGNC Symbol;Acc:HGNC:20457]
ENSG00000133424	182.897	2.17089	0.194195	8.71345e-30	1.61662e-28	9215	LARGE1	LARGE xylosyl- and glucuronyltransferase 1 [Source:HGNC Symbol;Acc:HGNC:6511]
ENSG00000007255	154.886	2.16783	0.208729	2.98979e-26	4.85715e-25	79090	TRAPPC6A	trafficking protein particle complex 6A [Source:HGNC Symbol;Acc:HGNC:23069]
ENSG00000221890	283.327	2.16512	0.175473	8.1421e-36	1.83345e-34	23467	NPTXR	neuronal pentraxin receptor [Source:HGNC Symbol;Acc:HGNC:7954]
ENSG00000162772	1117.97	2.16158	0.285121	3.99864e-15	3.92105e-14	467	ATF3	activating transcription factor 3 [Source:HGNC Symbol;Acc:HGNC:785]
ENSG00000149218	930.622	2.16037	0.0938361	4.56058e-118	4.42931e-116	23052	ENDOD1	endonuclease domain containing 1 [Source:HGNC Symbol;Acc:HGNC:29129]
ENSG00000120278	157.028	2.15268	0.210882	2.23001e-25	3.50556e-24	57480	PLEKHG1	pleckstrin homology and RhoGEF domain containing G1 [Source:HGNC Symbol;Acc:HGNC:20884]
ENSG00000109099	3445.13	2.15207	0.0721791	4.06997e-196	9.27703e-194	5376	PMP22	peripheral myelin protein 22 [Source:HGNC Symbol;Acc:HGNC:9118]
ENSG00000272899	62.3793	2.14893	0.36319	4.2965e-10	2.97137e-09	100130705	ATP6V1FNB	ATP6V1F neighbor [Source:HGNC Symbol;Acc:HGNC:52392]
ENSG00000197903	232.461	2.14654	0.178219	3.15276e-34	6.75878e-33	85236	H2BC12	H2B clustered histone 12 [Source:HGNC Symbol;Acc:HGNC:13954]
ENSG00000163513	1243.32	2.14241	0.0883166	1.36321e-130	1.50007e-128	7048	TGFBR2	transforming growth factor beta receptor 2 [Source:HGNC Symbol;Acc:HGNC:11773]
ENSG00000246859	143.53	2.13841	0.335781	1.9193e-11	1.48556e-10	100505678	STARD4-AS1	STARD4 antisense RNA 1 [Source:HGNC Symbol;Acc:HGNC:44117]
ENSG00000189058	76.0282	2.13766	0.303686	2.99127e-13	2.61932e-12	347	APOD	apolipoprotein D [Source:HGNC Symbol;Acc:HGNC:612]
ENSG00000003147	273.045	2.13171	0.198397	7.69781e-28	1.33297e-26	3382	ICA1	islet cell autoantigen 1 [Source:HGNC Symbol;Acc:HGNC:5343]
ENSG00000182890	72.4109	2.13017	0.305095	3.93918e-13	3.4292e-12	2747	GLUD2	glutamate dehydrogenase 2 [Source:HGNC Symbol;Acc:HGNC:4336]
ENSG00000178031	114.467	2.12849	0.299858	8.10098e-14	7.36207e-13	92949	ADAMTSL1	ADAMTS like 1 [Source:HGNC Symbol;Acc:HGNC:14632]
ENSG00000118257	3875.07	2.12397	0.0685283	1.43845e-211	3.65138e-209	8828	NRP2	neuropilin 2 [Source:HGNC Symbol;Acc:HGNC:8005]
ENSG00000223764	67.206	2.12174	0.408882	1.79937e-08	1.08107e-07	100130417	LINC02593	long intergenic non-protein coding RNA 2593 [Source:HGNC Symbol;Acc:HGNC:53933]
ENSG00000115266	256.88	2.11985	0.181168	1.11224e-32	2.27104e-31	10297	APC2	APC regulator of WNT signaling pathway 2 [Source:HGNC Symbol;Acc:HGNC:24036]
ENSG00000131781	33.0847	2.11954	0.438951	1.76063e-07	9.56677e-07	2330	FMO5	flavin containing dimethylaniline monoxygenase 5 [Source:HGNC Symbol;Acc:HGNC:3773]
ENSG00000253537	370.336	2.11619	0.146656	2.74806e-48	8.28423e-47	56108	PCDHGA7	protocadherin gamma subfamily A, 7 [Source:HGNC Symbol;Acc:HGNC:8705]
ENSG00000143153	1871.31	2.11278	0.0782475	1.89622e-161	2.90122e-159	481	ATP1B1	ATPase Na+/K+ transporting subunit beta 1 [Source:HGNC Symbol;Acc:HGNC:804]
ENSG00000090661	254.467	2.1124	0.167046	1.68178e-37	3.95864e-36	79603	CERS4	ceramide synthase 4 [Source:HGNC Symbol;Acc:HGNC:23747]
ENSG00000151917	101.641	2.10614	0.254342	1.36572e-17	1.50431e-16	221336	BEND6	BEN domain containing 6 [Source:HGNC Symbol;Acc:HGNC:20871]
ENSG00000237541	445.786	2.10585	0.132158	6.03411e-58	2.26158e-56	3118	HLA-DQA2	major histocompatibility complex, class II, DQ alpha 2 [Source:HGNC Symbol;Acc:HGNC:4943]
ENSG00000124098	1668.17	2.10516	0.0762142	9.09163e-169	1.53855e-166	116151	FAM210B	family with sequence similarity 210 member B [Source:HGNC Symbol;Acc:HGNC:16102]
ENSG00000101638	81.507	2.10248	0.336868	2.95777e-11	2.25805e-10	29906	ST8SIA5	ST8 alpha-N-acetyl-neuraminide alpha-2,8-sialyltransferase 5 [Source:HGNC Symbol;Acc:HGNC:17827]
ENSG00000150687	2063.26	2.09793	0.0770633	7.23398e-164	1.13798e-161	11098	PRSS23	serine protease 23 [Source:HGNC Symbol;Acc:HGNC:14370]
ENSG00000050165	561.596	2.09769	0.139353	3.87735e-52	1.27935e-50	27122	DKK3	dickkopf WNT signaling pathway inhibitor 3 [Source:HGNC Symbol;Acc:HGNC:2893]
ENSG00000122008	517.304	2.09755	0.121489	8.45938e-68	3.96154e-66	51426	POLK	DNA polymerase kappa [Source:HGNC Symbol;Acc:HGNC:9183]
ENSG00000099860	465.578	2.09202	0.149352	1.6605e-45	4.71911e-44	4616	GADD45B	growth arrest and DNA damage inducible beta [Source:HGNC Symbol;Acc:HGNC:4096]
ENSG00000114200	149.632	2.09087	0.226239	3.82543e-21	5.03551e-20	590	BCHE	butyrylcholinesterase [Source:HGNC Symbol;Acc:HGNC:983]
ENSG00000182985	2077.38	2.08758	0.0752297	1.9864e-170	3.49388e-168	23705	CADM1	cell adhesion molecule 1 [Source:HGNC Symbol;Acc:HGNC:5951]
ENSG00000171234	57.9723	2.08667	0.338981	8.28263e-11	6.09211e-10	7364	UGT2B7	UDP glucuronosyltransferase family 2 member B7 [Source:HGNC Symbol;Acc:HGNC:12554]
ENSG00000120833	315.174	2.08517	0.147695	3.98412e-46	1.14835e-44	8835	SOCS2	suppressor of cytokine signaling 2 [Source:HGNC Symbol;Acc:HGNC:19382]
ENSG00000203727	73.849	2.08289	0.303434	1.00995e-12	8.54235e-12	389432	SAMD5	sterile alpha motif domain containing 5 [Source:HGNC Symbol;Acc:HGNC:21180]
ENSG00000170634	129.845	2.07924	0.227579	8.07579e-21	1.04517e-19	98	ACYP2	acylphosphatase 2 [Source:HGNC Symbol;Acc:HGNC:180]
ENSG00000091490	945.35	2.07549	0.10869	6.97229e-82	4.15325e-80	23231	SEL1L3	SEL1L family member 3 [Source:HGNC Symbol;Acc:HGNC:29108]
ENSG00000137177	897.18	2.07109	0.0955414	3.12332e-105	2.62288e-103	63971	KIF13A	kinesin family member 13A [Source:HGNC Symbol;Acc:HGNC:14566]
ENSG00000123989	5828.63	2.06707	0.0641367	1.09873e-228	3.10677e-226	79586	CHPF	chondroitin polymerizing factor [Source:HGNC Symbol;Acc:HGNC:24291]
ENSG00000122547	57.0783	2.0633	0.329976	4.88695e-11	3.67681e-10	80820	EEPD1	endonuclease/exonuclease/phosphatase family domain containing 1 [Source:HGNC Symbol;Acc:HGNC:22223]
ENSG00000241404	199.54	2.06245	0.188544	1.26258e-28	2.25629e-27	80864	EGFL8	EGF like domain multiple 8 [Source:HGNC Symbol;Acc:HGNC:13944]
ENSG00000173531	379.395	2.06153	0.155954	6.36702e-41	1.63479e-39	4485	MST1	macrophage stimulating 1 [Source:HGNC Symbol;Acc:HGNC:7380]
ENSG00000115318	7461.97	2.0521	0.0675915	2.21903e-203	5.32996e-201	84695	LOXL3	lysyl oxidase like 3 [Source:HGNC Symbol;Acc:HGNC:13869]
ENSG00000162520	291.273	2.04965	0.190921	1.18216e-27	2.03131e-26	81493	SYNC	syncoilin, intermediate filament protein [Source:HGNC Symbol;Acc:HGNC:28897]
ENSG00000100299	465.323	2.04741	0.130801	2.56865e-56	9.21005e-55	410	ARSA	arylsulfatase A [Source:HGNC Symbol;Acc:HGNC:713]
ENSG00000184923	51.4548	2.04529	0.447239	6.24617e-07	3.20383e-06	728118	NUTM2A	NUT family member 2A [Source:HGNC Symbol;Acc:HGNC:23438]
ENSG00000133121	1343.88	2.04436	0.105809	4.91798e-84	3.03475e-82	90627	STARD13	StAR related lipid transfer domain containing 13 [Source:HGNC Symbol;Acc:HGNC:19164]
ENSG00000144560	2436.71	2.0435	0.10076	2.50633e-92	1.76614e-90	9686	VGLL4	vestigial like family member 4 [Source:HGNC Symbol;Acc:HGNC:28966]
ENSG00000012822	1013.27	2.03756	0.11324	3.65474e-73	1.86392e-71	57658	CALCOCO1	calcium binding and coiled-coil domain 1 [Source:HGNC Symbol;Acc:HGNC:29306]
ENSG00000184500	311.586	2.03613	0.146956	1.79371e-44	4.97739e-43	5627	PROS1	protein S [Source:HGNC Symbol;Acc:HGNC:9456]
ENSG00000119138	6066.48	2.03449	0.0837901	3.78752e-131	4.1884e-129	687	KLF9	Kruppel like factor 9 [Source:HGNC Symbol;Acc:HGNC:1123]
ENSG00000049323	200.782	2.03215	0.212188	9.40704e-23	1.33588e-21	4052	LTBP1	latent transforming growth factor beta binding protein 1 [Source:HGNC Symbol;Acc:HGNC:6714]
ENSG00000172086	198.47	2.03067	0.199782	3.53349e-25	5.51195e-24	51315	KRCC1	lysine rich coiled-coil 1 [Source:HGNC Symbol;Acc:HGNC:28039]
ENSG00000174456	200.583	2.02625	0.211802	1.79552e-22	2.5162e-21	400073	C12orf76	chromosome 12 open reading frame 76 [Source:HGNC Symbol;Acc:HGNC:33790]
ENSG00000124813	150.563	2.02218	0.22967	1.27058e-19	1.54251e-18	860	RUNX2	RUNX family transcription factor 2 [Source:HGNC Symbol;Acc:HGNC:10472]
ENSG00000196275	192.217	2.01963	0.201851	2.42507e-24	3.69014e-23	84163	GTF2IRD2	GTF2I repeat domain containing 2 [Source:HGNC Symbol;Acc:HGNC:30775]
ENSG00000163794	56.8614	2.0171	0.34865	9.86345e-10	6.66454e-09	7349	UCN	urocortin [Source:HGNC Symbol;Acc:HGNC:12516]
ENSG00000128872	393.896	2.0162	0.222871	2.17091e-20	2.74597e-19	29767	TMOD2	tropomodulin 2 [Source:HGNC Symbol;Acc:HGNC:11872]
ENSG00000074964	363.629	2.01524	0.154033	8.99535e-40	2.24261e-38	55160	ARHGEF10L	Rho guanine nucleotide exchange factor 10 like [Source:HGNC Symbol;Acc:HGNC:25540]
ENSG00000138642	134.818	2.01274	0.238215	4.07473e-18	4.60867e-17	55008	HERC6	HECT and RLD domain containing E3 ubiquitin protein ligase family member 6 [Source:HGNC Symbol;Acc:HGNC:26072]
ENSG00000033327	545.011	2.01196	0.117451	9.82828e-67	4.48965e-65	9846	GAB2	GRB2 associated binding protein 2 [Source:HGNC Symbol;Acc:HGNC:14458]
ENSG00000119917	240.41	2.01125	0.16578	1.07948e-34	2.35024e-33	3437	IFIT3	interferon induced protein with tetratricopeptide repeats 3 [Source:HGNC Symbol;Acc:HGNC:5411]
ENSG00000133069	236.659	2.0098	0.164816	5.14552e-35	1.13242e-33	9911	TMCC2	transmembrane and coiled-coil domain family 2 [Source:HGNC Symbol;Acc:HGNC:24239]
ENSG00000240583	53.9245	2.00909	0.413053	1.21665e-07	6.70718e-07	358	AQP1	aquaporin 1 (Colton blood group) [Source:HGNC Symbol;Acc:HGNC:633]
ENSG00000204961	153.194	2.00854	0.245535	4.06003e-17	4.36654e-16	9752	PCDHA9	protocadherin alpha 9 [Source:HGNC Symbol;Acc:HGNC:8675]
ENSG00000116962	8275	2.00055	0.0529838	0	0	4811	NID1	nidogen 1 [Source:HGNC Symbol;Acc:HGNC:7821]
ENSG00000253910	168.262	1.99415	0.216183	4.09566e-21	5.38169e-20	56103	PCDHGB2	protocadherin gamma subfamily B, 2 [Source:HGNC Symbol;Acc:HGNC:8709]
ENSG00000120708	4444.62	1.99388	0.0844502	2.96164e-124	3.03473e-122	7045	TGFBI	transforming growth factor beta induced [Source:HGNC Symbol;Acc:HGNC:11771]
ENSG00000214021	395.511	1.99291	0.179397	1.05e-29	1.94164e-28	26140	TTLL3	tubulin tyrosine ligase like 3 [Source:HGNC Symbol;Acc:HGNC:24483]
ENSG00000140470	75.7591	1.99197	0.313169	2.94607e-11	2.24989e-10	170691	ADAMTS17	ADAM metallopeptidase with thrombospondin type 1 motif 17 [Source:HGNC Symbol;Acc:HGNC:17109]
ENSG00000205403	603.793	1.99024	0.115253	1.53522e-67	7.15947e-66	3426	CFI	complement factor I [Source:HGNC Symbol;Acc:HGNC:5394]
ENSG00000169550	181.983	1.98863	0.213627	1.71139e-21	2.29329e-20	143662	MUC15	mucin 15, cell surface associated [Source:HGNC Symbol;Acc:HGNC:14956]
ENSG00000162630	36.8387	1.97825	0.437087	7.65863e-07	3.88462e-06	8707	B3GALT2	beta-1,3-galactosyltransferase 2 [Source:HGNC Symbol;Acc:HGNC:917]
ENSG00000061337	1212.29	1.97772	0.0874445	3.86332e-114	3.59579e-112	11178	LZTS1	leucine zipper tumor suppressor 1 [Source:HGNC Symbol;Acc:HGNC:13861]
ENSG00000064601	4141.15	1.97547	0.0593489	1.1467e-243	3.65929e-241	5476	CTSA	cathepsin A [Source:HGNC Symbol;Acc:HGNC:9251]
ENSG00000079150	90.7868	1.96155	0.270013	5.3388e-14	4.90371e-13	51661	FKBP7	FKBP prolyl isomerase 7 [Source:HGNC Symbol;Acc:HGNC:3723]
ENSG00000167106	1403.86	1.9568	0.0981523	1.6487e-89	1.09936e-87	399665	FAM102A	family with sequence similarity 102 member A [Source:HGNC Symbol;Acc:HGNC:31419]
ENSG00000158373	44.0951	1.95333	0.411931	3.00687e-07	1.59694e-06	3017	H2BC5	H2B clustered histone 5 [Source:HGNC Symbol;Acc:HGNC:4747]
ENSG00000102174	118.996	1.94399	0.269366	6.04285e-14	5.52538e-13	5251	PHEX	phosphate regulating endopeptidase homolog X-linked [Source:HGNC Symbol;Acc:HGNC:8918]
ENSG00000237440	100.408	1.94173	0.34571	2.59694e-09	1.69571e-08	100129842	ZNF737	zinc finger protein 737 [Source:HGNC Symbol;Acc:HGNC:32468]
ENSG00000143995	129.36	1.93932	0.233622	1.01808e-17	1.12975e-16	4211	MEIS1	Meis homeobox 1 [Source:HGNC Symbol;Acc:HGNC:7000]
ENSG00000137573	207.647	1.9383	0.222853	2.55408e-19	3.05423e-18	23213	SULF1	sulfatase 1 [Source:HGNC Symbol;Acc:HGNC:20391]
ENSG00000185010	57.8003	1.93738	0.351137	5.06705e-09	3.20736e-08	2157	F8	coagulation factor VIII [Source:HGNC Symbol;Acc:HGNC:3546]
ENSG00000154175	105.138	1.9339	0.28187	1.02872e-12	8.69448e-12	25890	ABI3BP	ABI family member 3 binding protein [Source:HGNC Symbol;Acc:HGNC:17265]
ENSG00000119922	108.98	1.93051	0.263159	2.50221e-14	2.34162e-13	3433	IFIT2	interferon induced protein with tetratricopeptide repeats 2 [Source:HGNC Symbol;Acc:HGNC:5409]
ENSG00000100292	192.146	1.93016	0.183001	8.1466e-27	1.34899e-25	3162	HMOX1	heme oxygenase 1 [Source:HGNC Symbol;Acc:HGNC:5013]
ENSG00000238243	36.9472	1.92918	0.444765	1.69632e-06	8.27525e-06	343171	OR2W3	olfactory receptor family 2 subfamily W member 3 [Source:HGNC Symbol;Acc:HGNC:15021]
ENSG00000221821	55.5686	1.92645	0.363438	1.73108e-08	1.04145e-07	441150	C6orf226	chromosome 6 open reading frame 226 [Source:HGNC Symbol;Acc:HGNC:34431]
ENSG00000136205	4062.57	1.92623	0.0615247	4.73241e-216	1.22922e-213	64759	TNS3	tensin 3 [Source:HGNC Symbol;Acc:HGNC:21616]
ENSG00000163126	56.0984	1.92561	0.3282	6.46897e-10	4.42314e-09	200539	ANKRD23	ankyrin repeat domain 23 [Source:HGNC Symbol;Acc:HGNC:24470]
ENSG00000188573	53.4899	1.91893	0.352473	7.54974e-09	4.68852e-08	345630	FBLL1	fibrillarin like 1 [Source:HGNC Symbol;Acc:HGNC:35458]
ENSG00000119729	1205.73	1.9128	0.0957024	1.50497e-89	1.00955e-87	23433	RHOQ	ras homolog family member Q [Source:HGNC Symbol;Acc:HGNC:17736]
ENSG00000102854	143.181	1.91268	0.216168	1.35495e-19	1.64226e-18	10232	MSLN	mesothelin [Source:HGNC Symbol;Acc:HGNC:7371]
ENSG00000018236	126.04	1.90712	0.229158	1.42262e-17	1.56544e-16	1272	CNTN1	contactin 1 [Source:HGNC Symbol;Acc:HGNC:2171]
ENSG00000152926	127.089	1.89843	0.251783	7.93399e-15	7.66564e-14	51351	ZNF117	zinc finger protein 117 [Source:HGNC Symbol;Acc:HGNC:12897]
ENSG00000137070	294.783	1.8969	0.14778	1.48912e-38	3.60388e-37	3590	IL11RA	interleukin 11 receptor subunit alpha [Source:HGNC Symbol;Acc:HGNC:5967]
ENSG00000179630	80.9529	1.89434	0.287845	5.37547e-12	4.33962e-11	144811	LACC1	laccase domain containing 1 [Source:HGNC Symbol;Acc:HGNC:26789]
ENSG00000125046	170.684	1.89349	0.224907	3.9727e-18	4.49783e-17	51066	SSUH2	ssu-2 homolog [Source:HGNC Symbol;Acc:HGNC:24809]
ENSG00000239697	77.7223	1.8928	0.315415	2.69686e-10	1.9022e-09	8742	TNFSF12	TNF superfamily member 12 [Source:HGNC Symbol;Acc:HGNC:11927]
ENSG00000145555	503.307	1.88972	0.144482	8.39245e-40	2.09698e-38	4651	MYO10	myosin X [Source:HGNC Symbol;Acc:HGNC:7593]
ENSG00000126005	1136.33	1.88616	0.0907432	7.5082e-97	5.57203e-95	101410538	MMP24OS	MMP24 opposite strand [Source:HGNC Symbol;Acc:HGNC:44421]
ENSG00000067113	416.51	1.87953	0.133807	1.20008e-45	3.42806e-44	8611	PLPP1	phospholipid phosphatase 1 [Source:HGNC Symbol;Acc:HGNC:9228]
ENSG00000181449	546.974	1.87807	0.136054	3.47339e-44	9.55525e-43	6657	SOX2	SRY-box transcription factor 2 [Source:HGNC Symbol;Acc:HGNC:11195]
ENSG00000113248	110.538	1.87339	0.236708	3.55524e-16	3.64632e-15	56121	PCDHB15	protocadherin beta 15 [Source:HGNC Symbol;Acc:HGNC:8686]
ENSG00000135643	64.8829	1.8726	0.397778	2.07575e-07	1.1219e-06	27345	KCNMB4	potassium calcium-activated channel subfamily M regulatory beta subunit 4 [Source:HGNC Symbol;Acc:HGNC:6289]
ENSG00000146021	55.3323	1.87148	0.39715	2.94066e-07	1.56327e-06	26249	KLHL3	kelch like family member 3 [Source:HGNC Symbol;Acc:HGNC:6354]
ENSG00000092758	15737.8	1.87093	0.0522923	3.50332e-281	1.53445e-278	1299	COL9A3	collagen type IX alpha 3 chain [Source:HGNC Symbol;Acc:HGNC:2219]
ENSG00000151117	89.4303	1.8657	0.298824	5.9138e-11	4.4211e-10	144110	TMEM86A	transmembrane protein 86A [Source:HGNC Symbol;Acc:HGNC:26890]
ENSG00000185008	127.242	1.86561	0.318252	6.34935e-10	4.34534e-09	6092	ROBO2	roundabout guidance receptor 2 [Source:HGNC Symbol;Acc:HGNC:10250]
ENSG00000188760	174.766	1.86558	0.188426	7.19696e-24	1.07536e-22	130612	TMEM198	transmembrane protein 198 [Source:HGNC Symbol;Acc:HGNC:33704]
ENSG00000188687	38.4043	1.86314	0.477702	1.04075e-05	4.61989e-05	57835	SLC4A5	solute carrier family 4 member 5 [Source:HGNC Symbol;Acc:HGNC:18168]
ENSG00000140807	40.8768	1.86291	0.450418	4.3014e-06	2.00218e-05	85407	NKD1	NKD inhibitor of WNT signaling pathway 1 [Source:HGNC Symbol;Acc:HGNC:17045]
ENSG00000196358	145.743	1.85923	0.377797	6.32628e-08	3.59859e-07	84628	NTNG2	netrin G2 [Source:HGNC Symbol;Acc:HGNC:14288]
ENSG00000163131	62.0963	1.85793	0.351265	1.36644e-08	8.30801e-08	1520	CTSS	cathepsin S [Source:HGNC Symbol;Acc:HGNC:2545]
ENSG00000196126	3626.36	1.85489	0.0663048	3.72043e-173	6.75667e-171	3123	HLA-DRB1	major histocompatibility complex, class II, DR beta 1 [Source:HGNC Symbol;Acc:HGNC:4948]
ENSG00000173598	2001.79	1.8534	0.0718027	1.34085e-147	1.83754e-145	11163	NUDT4	nudix hydrolase 4 [Source:HGNC Symbol;Acc:HGNC:8051]
ENSG00000219626	97.0564	1.85337	0.289779	1.74712e-11	1.35699e-10	375190	FAM228B	family with sequence similarity 228 member B [Source:HGNC Symbol;Acc:HGNC:24736]
ENSG00000173918	144.48	1.8527	0.210584	2.39468e-19	2.86668e-18	114897	C1QTNF1	C1q and TNF related 1 [Source:HGNC Symbol;Acc:HGNC:14324]
ENSG00000228288	54.5539	1.84027	0.344992	1.39439e-08	8.47103e-08	100506696	PCAT6	prostate cancer associated transcript 6 [Source:HGNC Symbol;Acc:HGNC:43714]
ENSG00000142920	201.595	1.83992	0.19539	4.94706e-22	6.80884e-21	113451	AZIN2	antizyme inhibitor 2 [Source:HGNC Symbol;Acc:HGNC:29957]
ENSG00000163346	1342.01	1.83967	0.0876226	7.10222e-99	5.4332e-97	57326	PBXIP1	PBX homeobox interacting protein 1 [Source:HGNC Symbol;Acc:HGNC:21199]
ENSG00000143126	2011.46	1.83784	0.0768839	3.01423e-127	3.19109e-125	1952	CELSR2	cadherin EGF LAG seven-pass G-type receptor 2 [Source:HGNC Symbol;Acc:HGNC:3231]
ENSG00000196155	1039.73	1.83445	0.0911163	6.55948e-91	4.50848e-89	25894	PLEKHG4	pleckstrin homology and RhoGEF domain containing G4 [Source:HGNC Symbol;Acc:HGNC:24501]
ENSG00000204947	53.3405	1.83278	0.366123	6.78212e-08	3.84613e-07	155054	ZNF425	zinc finger protein 425 [Source:HGNC Symbol;Acc:HGNC:20690]
ENSG00000167552	2711.29	1.83211	0.0880698	5.12841e-97	3.81862e-95	7846	TUBA1A	tubulin alpha 1a [Source:HGNC Symbol;Acc:HGNC:20766]
ENSG00000268001	33.8023	1.83167	0.430353	2.75607e-06	1.31018e-05	100505812	CARD8-AS1	CARD8 antisense RNA 1 [Source:HGNC Symbol;Acc:HGNC:51408]
ENSG00000188153	217.67	1.82782	0.519311	4.90234e-05	0.000197919	1287	COL4A5	collagen type IV alpha 5 chain [Source:HGNC Symbol;Acc:HGNC:2207]
ENSG00000134508	647.862	1.8269	0.120001	3.60256e-53	1.21746e-51	91768	CABLES1	Cdk5 and Abl enzyme substrate 1 [Source:HGNC Symbol;Acc:HGNC:25097]
ENSG00000186409	42.9549	1.82563	0.428189	2.40731e-06	1.15223e-05	728621	CCDC30	coiled-coil domain containing 30 [Source:HGNC Symbol;Acc:HGNC:26103]
ENSG00000198892	932.823	1.81419	0.0915164	2.75368e-88	1.80917e-86	149345	SHISA4	shisa family member 4 [Source:HGNC Symbol;Acc:HGNC:27139]
ENSG00000183098	954.214	1.81082	0.0901925	1.65101e-90	1.12784e-88	10082	GPC6	glypican 6 [Source:HGNC Symbol;Acc:HGNC:4454]
ENSG00000170345	4444.14	1.80713	0.115901	1.55995e-55	5.55761e-54	2353	FOS	Fos proto-oncogene, AP-1 transcription factor subunit [Source:HGNC Symbol;Acc:HGNC:3796]
ENSG00000186469	1025.47	1.80568	0.110433	4.95934e-61	2.03269e-59	54331	GNG2	G protein subunit gamma 2 [Source:HGNC Symbol;Acc:HGNC:4404]
ENSG00000154556	586.935	1.8049	0.134429	8.53467e-42	2.23502e-40	8470	SORBS2	sorbin and SH3 domain containing 2 [Source:HGNC Symbol;Acc:HGNC:24098]
ENSG00000118785	196.892	1.80414	0.199954	3.41933e-20	4.29831e-19	6696	SPP1	secreted phosphoprotein 1 [Source:HGNC Symbol;Acc:HGNC:11255]
ENSG00000274471	73.418	1.80005	0.327858	6.79886e-09	4.23871e-08	100132101	HERC2P7	hect domain and RLD 2 pseudogene 7 [Source:NCBI gene (formerly Entrezgene);Acc:100132101]
ENSG00000137203	503.914	1.79966	0.134732	1.24035e-41	3.22926e-40	7020	TFAP2A	transcription factor AP-2 alpha [Source:HGNC Symbol;Acc:HGNC:11742]
ENSG00000152137	105.383	1.79863	0.263931	1.4777e-12	1.24094e-11	26353	HSPB8	heat shock protein family B (small) member 8 [Source:HGNC Symbol;Acc:HGNC:30171]
ENSG00000113273	532.22	1.79495	0.11793	4.67941e-53	1.5766e-51	411	ARSB	arylsulfatase B [Source:HGNC Symbol;Acc:HGNC:714]
ENSG00000157227	3612.4	1.79491	0.070104	1.83899e-145	2.4452e-143	4323	MMP14	matrix metallopeptidase 14 [Source:HGNC Symbol;Acc:HGNC:7160]
ENSG00000198502	2953.79	1.79454	0.0711203	2.96908e-141	3.74708e-139	3127	HLA-DRB5	major histocompatibility complex, class II, DR beta 5 [Source:HGNC Symbol;Acc:HGNC:4953]
ENSG00000099953	67.4378	1.79135	0.297449	2.58749e-10	1.82959e-09	4320	MMP11	matrix metallopeptidase 11 [Source:HGNC Symbol;Acc:HGNC:7157]
ENSG00000230798	155.831	1.78922	0.209001	1.77621e-18	2.04626e-17	100996301	FOXD3-AS1	FOXD3 antisense RNA 1 [Source:HGNC Symbol;Acc:HGNC:40241]
ENSG00000169933	52.0757	1.78884	0.363461	1.22518e-07	6.75252e-07	9758	FRMPD4	FERM and PDZ domain containing 4 [Source:HGNC Symbol;Acc:HGNC:29007]
ENSG00000187391	149.109	1.78836	0.250408	1.14427e-13	1.02654e-12	9863	MAGI2	membrane associated guanylate kinase, WW and PDZ domain containing 2 [Source:HGNC Symbol;Acc:HGNC:18957]
ENSG00000196427	36.5198	1.78745	0.408774	1.69717e-06	8.27761e-06	148545	NBPF4	NBPF member 4 [Source:HGNC Symbol;Acc:HGNC:26550]
ENSG00000257365	401.374	1.7874	0.134369	3.25065e-41	8.42377e-40	2342	FNTB	farnesyltransferase, CAAX box, beta [Source:HGNC Symbol;Acc:HGNC:3785]
ENSG00000164434	125.442	1.78365	0.218486	5.81073e-17	6.20756e-16	2173	FABP7	fatty acid binding protein 7 [Source:HGNC Symbol;Acc:HGNC:3562]
ENSG00000166147	1533.11	1.77525	0.0924341	6.07486e-83	3.66757e-81	2200	FBN1	fibrillin 1 [Source:HGNC Symbol;Acc:HGNC:3603]
ENSG00000164627	40.7718	1.77372	0.400348	1.37714e-06	6.78337e-06	221458	KIF6	kinesin family member 6 [Source:HGNC Symbol;Acc:HGNC:21202]
ENSG00000161395	330.897	1.77115	0.15372	1.8601e-31	3.66734e-30	93210	PGAP3	post-GPI attachment to proteins phospholipase 3 [Source:HGNC Symbol;Acc:HGNC:23719]
ENSG00000148655	41.9304	1.76698	0.41033	2.1843e-06	1.05157e-05	83938	LRMDA	leucine rich melanocyte differentiation associated [Source:HGNC Symbol;Acc:HGNC:23405]
ENSG00000176222	45.0162	1.76358	0.379969	5.28341e-07	2.7307e-06	342908	ZNF404	zinc finger protein 404 [Source:HGNC Symbol;Acc:HGNC:19417]
ENSG00000137767	39.1366	1.7606	0.430969	5.1212e-06	2.36554e-05	58472	SQOR	sulfide quinone oxidoreductase [Source:HGNC Symbol;Acc:HGNC:20390]
ENSG00000176170	455.432	1.76004	0.142638	1.04387e-35	2.34587e-34	8877	SPHK1	sphingosine kinase 1 [Source:HGNC Symbol;Acc:HGNC:11240]
ENSG00000080845	2753.95	1.75627	0.0693889	3.77185e-142	4.84227e-140	22839	DLGAP4	DLG associated protein 4 [Source:HGNC Symbol;Acc:HGNC:24476]
ENSG00000118523	3331.39	1.74947	0.429624	7.51896e-06	3.40135e-05	1490	CCN2	cellular communication network factor 2 [Source:HGNC Symbol;Acc:HGNC:2500]
ENSG00000136542	120.97	1.74626	0.276335	3.45631e-11	2.62698e-10	11227	GALNT5	polypeptide N-acetylgalactosaminyltransferase 5 [Source:HGNC Symbol;Acc:HGNC:4127]
ENSG00000184838	68.3114	1.74562	0.301256	9.95845e-10	6.72669e-09	51334	PRR16	proline rich 16 [Source:HGNC Symbol;Acc:HGNC:29654]
ENSG00000204287	6432.33	1.74445	0.0641703	1.76857e-163	2.74349e-161	3122	HLA-DRA	major histocompatibility complex, class II, DR alpha [Source:HGNC Symbol;Acc:HGNC:4947]
ENSG00000185522	68.4387	1.74363	0.306822	2.15689e-09	1.41708e-08	256329	LMNTD2	lamin tail domain containing 2 [Source:HGNC Symbol;Acc:HGNC:28561]
ENSG00000120690	746.721	1.74321	0.111698	1.63657e-55	5.82129e-54	1997	ELF1	E74 like ETS transcription factor 1 [Source:HGNC Symbol;Acc:HGNC:3316]
ENSG00000030419	83.7412	1.7431	0.335954	2.33171e-08	1.38526e-07	22807	IKZF2	IKAROS family zinc finger 2 [Source:HGNC Symbol;Acc:HGNC:13177]
ENSG00000165655	650.252	1.73657	0.112994	3.24011e-54	1.11522e-52	84858	ZNF503	zinc finger protein 503 [Source:HGNC Symbol;Acc:HGNC:23589]
ENSG00000162927	47.6146	1.73388	0.371925	4.73179e-07	2.46384e-06	150962	PUS10	pseudouridine synthase 10 [Source:HGNC Symbol;Acc:HGNC:26505]
ENSG00000139132	467.479	1.73317	0.150196	1.34239e-31	2.66073e-30	121512	FGD4	FYVE, RhoGEF and PH domain containing 4 [Source:HGNC Symbol;Acc:HGNC:19125]
ENSG00000204257	981.22	1.73299	0.0892123	7.23376e-85	4.53898e-83	3108	HLA-DMA	major histocompatibility complex, class II, DM alpha [Source:HGNC Symbol;Acc:HGNC:4934]
ENSG00000110693	116.659	1.73217	0.268498	2.09397e-11	1.61628e-10	55553	SOX6	SRY-box transcription factor 6 [Source:HGNC Symbol;Acc:HGNC:16421]
ENSG00000144366	1031.93	1.73017	0.0925708	1.34155e-78	7.52951e-77	51454	GULP1	GULP PTB domain containing engulfment adaptor 1 [Source:HGNC Symbol;Acc:HGNC:18649]
ENSG00000162461	52.0378	1.72666	0.405568	2.37289e-06	1.13673e-05	284723	SLC25A34	solute carrier family 25 member 34 [Source:HGNC Symbol;Acc:HGNC:27653]
ENSG00000013288	608.991	1.72162	0.148819	8.56811e-32	1.70735e-30	23324	MAN2B2	mannosidase alpha class 2B member 2 [Source:HGNC Symbol;Acc:HGNC:29623]
ENSG00000167216	37.0205	1.72074	0.42434	6.82098e-06	3.1032e-05	83473	KATNAL2	katanin catalytic subunit A1 like 2 [Source:HGNC Symbol;Acc:HGNC:25387]
ENSG00000073605	81.9198	1.71937	0.331026	2.72292e-08	1.60826e-07	55876	GSDMB	gasdermin B [Source:HGNC Symbol;Acc:HGNC:23690]
ENSG00000103355	497.547	1.71871	0.131193	4.0393e-40	1.0184e-38	260429	PRSS33	serine protease 33 [Source:HGNC Symbol;Acc:HGNC:30405]
ENSG00000151773	71.2384	1.71797	0.32422	1.66756e-08	1.00567e-07	160857	CCDC122	coiled-coil domain containing 122 [Source:HGNC Symbol;Acc:HGNC:26478]
ENSG00000116667	543.158	1.71792	0.122409	1.43372e-45	4.09021e-44	81563	C1orf21	chromosome 1 open reading frame 21 [Source:HGNC Symbol;Acc:HGNC:15494]
ENSG00000176945	50.533	1.71748	0.529619	0.000150333	0.000569948	200958	MUC20	mucin 20, cell surface associated [Source:HGNC Symbol;Acc:HGNC:23282]
ENSG00000143842	728.283	1.71558	0.10789	1.1617e-57	4.33223e-56	9580	SOX13	SRY-box transcription factor 13 [Source:HGNC Symbol;Acc:HGNC:11192]
ENSG00000204580	3854.6	1.71528	0.0933585	5.52888e-76	2.976e-74	780	DDR1	discoidin domain receptor tyrosine kinase 1 [Source:HGNC Symbol;Acc:HGNC:2730]
ENSG00000119950	805.799	1.71491	0.100266	2.84034e-66	1.26895e-64	4601	MXI1	MAX interactor 1, dimerization protein [Source:HGNC Symbol;Acc:HGNC:7534]
ENSG00000135924	619.27	1.71483	0.124309	4.07625e-44	1.11724e-42	3300	DNAJB2	DnaJ heat shock protein family (Hsp40) member B2 [Source:HGNC Symbol;Acc:HGNC:5228]
ENSG00000168487	895.581	1.71342	0.100063	1.8387e-66	8.26417e-65	649	BMP1	bone morphogenetic protein 1 [Source:HGNC Symbol;Acc:HGNC:1067]
ENSG00000107249	951.746	1.71004	0.114331	2.90865e-51	9.4438e-50	169792	GLIS3	GLIS family zinc finger 3 [Source:HGNC Symbol;Acc:HGNC:28510]
ENSG00000005243	303.04	1.70905	0.175532	3.95649e-23	5.71669e-22	51226	COPZ2	COPI coat complex subunit zeta 2 [Source:HGNC Symbol;Acc:HGNC:19356]
ENSG00000254815	53.0532	1.70873	0.382596	1.27347e-06	6.30467e-06	692247	LMNTD2-AS1	LMNTD2 antisense RNA 1 [Source:HGNC Symbol;Acc:HGNC:41204]
ENSG00000112414	1055.77	1.70664	0.091512	2.30668e-78	1.28817e-76	57211	ADGRG6	adhesion G protein-coupled receptor G6 [Source:HGNC Symbol;Acc:HGNC:13841]
ENSG00000136770	375.086	1.706	0.135331	2.70554e-37	6.29544e-36	64215	DNAJC1	DnaJ heat shock protein family (Hsp40) member C1 [Source:HGNC Symbol;Acc:HGNC:20090]
ENSG00000134243	1104.12	1.7024	0.0856058	8.87066e-89	5.87991e-87	6272	SORT1	sortilin 1 [Source:HGNC Symbol;Acc:HGNC:11186]
ENSG00000168916	780.368	1.70122	0.138145	1.37336e-35	3.07396e-34	57507	ZNF608	zinc finger protein 608 [Source:HGNC Symbol;Acc:HGNC:29238]
ENSG00000198832	394.655	1.70098	0.140088	1.18127e-34	2.56685e-33	140606	SELENOM	selenoprotein M [Source:HGNC Symbol;Acc:HGNC:30397]
ENSG00000102401	320.408	1.69845	0.150743	3.86632e-30	7.26985e-29	51566	ARMCX3	armadillo repeat containing X-linked 3 [Source:HGNC Symbol;Acc:HGNC:24065]
ENSG00000121413	201.612	1.69615	0.245248	6.73083e-13	5.7695e-12	65982	ZSCAN18	zinc finger and SCAN domain containing 18 [Source:HGNC Symbol;Acc:HGNC:21037]
ENSG00000126803	299.085	1.6961	0.151612	7.89639e-30	1.46747e-28	3306	HSPA2	heat shock protein family A (Hsp70) member 2 [Source:HGNC Symbol;Acc:HGNC:5235]
ENSG00000049769	109.054	1.68742	0.245746	1.23084e-12	1.03713e-11	89801	PPP1R3F	protein phosphatase 1 regulatory subunit 3F [Source:HGNC Symbol;Acc:HGNC:14944]
ENSG00000146001	42.8815	1.68634	0.377195	1.26976e-06	6.28772e-06	54660	PCDHB18P	protocadherin beta 18 pseudogene [Source:HGNC Symbol;Acc:HGNC:14548]
ENSG00000081087	587.636	1.6861	0.384058	1.7277e-06	8.41916e-06	28962	OSTM1	osteoclastogenesis associated transmembrane protein 1 [Source:HGNC Symbol;Acc:HGNC:21652]
ENSG00000183840	106.718	1.68438	0.34693	1.91433e-07	1.03616e-06	2863	GPR39	G protein-coupled receptor 39 [Source:HGNC Symbol;Acc:HGNC:4496]
ENSG00000197747	7188.79	1.68422	0.0675378	5.57452e-138	6.731e-136	6281	S100A10	S100 calcium binding protein A10 [Source:HGNC Symbol;Acc:HGNC:10487]
ENSG00000006377	35.0837	1.68331	0.430729	1.44537e-05	6.30845e-05	1750	DLX6	distal-less homeobox 6 [Source:HGNC Symbol;Acc:HGNC:2919]
ENSG00000120324	115.988	1.68323	0.235322	1.31578e-13	1.17614e-12	56126	PCDHB10	protocadherin beta 10 [Source:HGNC Symbol;Acc:HGNC:8681]
ENSG00000143878	3094.97	1.68256	0.114384	6.7112e-50	2.09378e-48	388	RHOB	ras homolog family member B [Source:HGNC Symbol;Acc:HGNC:668]
ENSG00000090581	647.502	1.68226	0.104994	1.99607e-58	7.63499e-57	84572	GNPTG	N-acetylglucosamine-1-phosphate transferase subunit gamma [Source:HGNC Symbol;Acc:HGNC:23026]
ENSG00000196074	38.0405	1.67436	0.470438	4.50366e-05	0.00018308	10388	SYCP2	synaptonemal complex protein 2 [Source:HGNC Symbol;Acc:HGNC:11490]
ENSG00000145882	340.678	1.67353	0.136667	3.15972e-35	7.03007e-34	78991	PCYOX1L	prenylcysteine oxidase 1 like [Source:HGNC Symbol;Acc:HGNC:28477]
ENSG00000143603	226.451	1.67219	0.186287	5.42708e-20	6.74249e-19	3782	KCNN3	potassium calcium-activated channel subfamily N member 3 [Source:HGNC Symbol;Acc:HGNC:6292]
ENSG00000168679	428.776	1.67032	0.13457	3.16686e-36	7.2038e-35	9122	SLC16A4	solute carrier family 16 member 4 [Source:HGNC Symbol;Acc:HGNC:10925]
ENSG00000278709	91.4141	1.66948	0.258027	1.84508e-11	1.43109e-10	105416157	NKILA	NF-kappaB interacting lncRNA [Source:HGNC Symbol;Acc:HGNC:51599]
ENSG00000120251	56.1047	1.66614	0.369517	9.15769e-07	4.60316e-06	2891	GRIA2	glutamate ionotropic receptor AMPA type subunit 2 [Source:HGNC Symbol;Acc:HGNC:4572]
ENSG00000071051	818.836	1.66194	0.0935794	2.58602e-71	1.28943e-69	8440	NCK2	NCK adaptor protein 2 [Source:HGNC Symbol;Acc:HGNC:7665]
ENSG00000182700	55.5274	1.66126	0.365926	8.44663e-07	4.25724e-06	492311	IGIP	IgA inducing protein [Source:HGNC Symbol;Acc:HGNC:33847]
ENSG00000162722	844.786	1.66043	0.0989245	6.90388e-64	2.98296e-62	25893	TRIM58	tripartite motif containing 58 [Source:HGNC Symbol;Acc:HGNC:24150]
ENSG00000111266	395.177	1.65855	0.168609	1.61706e-23	2.38428e-22	80824	DUSP16	dual specificity phosphatase 16 [Source:HGNC Symbol;Acc:HGNC:17909]
ENSG00000225684	77.4419	1.65659	0.333596	1.02655e-07	5.69291e-07	100128385	FAM225B	family with sequence similarity 225 member B [Source:HGNC Symbol;Acc:HGNC:21865]
ENSG00000157399	161.835	1.65473	0.227151	5.73328e-14	5.25092e-13	415	ARSL	arylsulfatase L [Source:HGNC Symbol;Acc:HGNC:719]
ENSG00000076706	7181.43	1.65284	0.0540319	4.15659e-206	1.04326e-203	4162	MCAM	melanoma cell adhesion molecule [Source:HGNC Symbol;Acc:HGNC:6934]
ENSG00000128656	308.155	1.65114	0.177031	1.99673e-21	2.66764e-20	1123	CHN1	chimerin 1 [Source:HGNC Symbol;Acc:HGNC:1943]
ENSG00000124786	128.784	1.65065	0.221827	1.80738e-14	1.71e-13	51000	SLC35B3	solute carrier family 35 member B3 [Source:HGNC Symbol;Acc:HGNC:21601]
ENSG00000164509	139.144	1.64993	0.228476	1.02895e-13	9.27552e-13	133396	IL31RA	interleukin 31 receptor A [Source:HGNC Symbol;Acc:HGNC:18969]
ENSG00000164307	1238.79	1.64892	0.0914636	2.88062e-73	1.47585e-71	51752	ERAP1	endoplasmic reticulum aminopeptidase 1 [Source:HGNC Symbol;Acc:HGNC:18173]
ENSG00000242574	416.729	1.64801	0.135546	8.2615e-35	1.80573e-33	3109	HLA-DMB	major histocompatibility complex, class II, DM beta [Source:HGNC Symbol;Acc:HGNC:4935]
ENSG00000232859	37.0245	1.64775	0.411378	9.87958e-06	4.40201e-05	201229	LYRM9	LYR motif containing 9 [Source:HGNC Symbol;Acc:HGNC:27314]
ENSG00000183762	412.676	1.64401	0.147621	1.65488e-29	3.04003e-28	83999	KREMEN1	kringle containing transmembrane protein 1 [Source:HGNC Symbol;Acc:HGNC:17550]
ENSG00000048707	1019.42	1.64019	0.126872	6.5783e-39	1.59898e-37	55187	VPS13D	vacuolar protein sorting 13 homolog D [Source:HGNC Symbol;Acc:HGNC:23595]
ENSG00000204642	117.699	1.63963	0.275284	3.06073e-10	2.14799e-09	3134	HLA-F	major histocompatibility complex, class I, F [Source:HGNC Symbol;Acc:HGNC:4963]
ENSG00000101460	437.321	1.63869	0.125409	8.33625e-40	2.08528e-38	84557	MAP1LC3A	microtubule associated protein 1 light chain 3 alpha [Source:HGNC Symbol;Acc:HGNC:6838]
ENSG00000106078	246.323	1.6372	0.168763	6.22332e-23	8.9056e-22	23242	COBL	cordon-bleu WH2 repeat protein [Source:HGNC Symbol;Acc:HGNC:22199]
ENSG00000180769	35.174	1.63532	0.425797	2.09572e-05	8.95108e-05	404201	WDFY3-AS2	WDFY3 antisense RNA 2 [Source:HGNC Symbol;Acc:HGNC:21603]
ENSG00000113070	179.612	1.63448	0.268164	1.80314e-10	1.29222e-09	1839	HBEGF	heparin binding EGF like growth factor [Source:HGNC Symbol;Acc:HGNC:3059]
ENSG00000205221	59.7265	1.63419	0.319714	6.00921e-08	3.4252e-07	5212	VIT	vitrin [Source:HGNC Symbol;Acc:HGNC:12697]
ENSG00000168502	349.458	1.63356	0.172931	7.34933e-22	1.00471e-20	23255	MTCL1	microtubule crosslinking factor 1 [Source:HGNC Symbol;Acc:HGNC:29121]
ENSG00000008086	174.788	1.6334	0.224237	6.82477e-14	6.21998e-13	6792	CDKL5	cyclin dependent kinase like 5 [Source:HGNC Symbol;Acc:HGNC:11411]
ENSG00000070404	1235.45	1.63314	0.0873021	9.69724e-79	5.47013e-77	10272	FSTL3	follistatin like 3 [Source:HGNC Symbol;Acc:HGNC:3973]
ENSG00000164953	314.707	1.63219	0.147367	3.56008e-29	6.49714e-28	91147	TMEM67	transmembrane protein 67 [Source:HGNC Symbol;Acc:HGNC:28396]
ENSG00000111653	461.552	1.62937	0.129331	4.82692e-37	1.1185e-35	51147	ING4	inhibitor of growth family member 4 [Source:HGNC Symbol;Acc:HGNC:19423]
ENSG00000107796	106.802	1.62566	0.23426	7.57359e-13	6.47203e-12	59	ACTA2	actin alpha 2, smooth muscle [Source:HGNC Symbol;Acc:HGNC:130]
ENSG00000223865	1161.67	1.62321	0.0849427	3.78592e-82	2.27339e-80	3115	HLA-DPB1	major histocompatibility complex, class II, DP beta 1 [Source:HGNC Symbol;Acc:HGNC:4940]
ENSG00000261761	33.9468	1.62231	0.43577	3.24125e-05	0.000134754	100508631	LINC02616	long intergenic non-protein coding RNA 2616 [Source:HGNC Symbol;Acc:HGNC:54078]
ENSG00000170153	430.415	1.62197	0.128202	1.98807e-37	4.66977e-36	57484	RNF150	ring finger protein 150 [Source:HGNC Symbol;Acc:HGNC:23138]
ENSG00000163328	104.754	1.62115	0.395509	5.2541e-06	2.42241e-05	151556	GPR155	G protein-coupled receptor 155 [Source:HGNC Symbol;Acc:HGNC:22951]
ENSG00000135124	45.6499	1.61831	0.375865	2.4914e-06	1.18993e-05	5025	P2RX4	purinergic receptor P2X 4 [Source:HGNC Symbol;Acc:HGNC:8535]
ENSG00000243279	1689.72	1.61826	0.0746668	6.35764e-105	5.27944e-103	11230	PRAF2	PRA1 domain family member 2 [Source:HGNC Symbol;Acc:HGNC:28911]
ENSG00000176697	65.014	1.61451	0.308278	2.69969e-08	1.59539e-07	627	BDNF	brain derived neurotrophic factor [Source:HGNC Symbol;Acc:HGNC:1033]
ENSG00000030582	5078.27	1.61155	0.0617453	7.83779e-151	1.10114e-148	2896	GRN	granulin precursor [Source:HGNC Symbol;Acc:HGNC:4601]
ENSG00000168685	268.949	1.6066	0.152923	1.53414e-26	2.52726e-25	3575	IL7R	interleukin 7 receptor [Source:HGNC Symbol;Acc:HGNC:6024]
ENSG00000135063	46.8679	1.60617	0.382144	4.16245e-06	1.93993e-05	9413	FAM189A2	family with sequence similarity 189 member A2 [Source:HGNC Symbol;Acc:HGNC:24820]
ENSG00000077585	427.273	1.6027	0.126597	1.90811e-37	4.48666e-36	7107	GPR137B	G protein-coupled receptor 137B [Source:HGNC Symbol;Acc:HGNC:11862]
ENSG00000066084	1776.93	1.59903	0.0723827	6.775e-109	5.91172e-107	57609	DIP2B	disco interacting protein 2 homolog B [Source:HGNC Symbol;Acc:HGNC:29284]
ENSG00000275074	98.1561	1.59873	0.241982	7.49284e-12	5.99266e-11	79873	NUDT18	nudix hydrolase 18 [Source:HGNC Symbol;Acc:HGNC:26194]
ENSG00000100359	995.312	1.59821	0.0990354	3.03304e-59	1.19072e-57	27352	SGSM3	small G protein signaling modulator 3 [Source:HGNC Symbol;Acc:HGNC:25228]
ENSG00000112531	2663.4	1.59709	0.0770396	4.555e-96	3.33605e-94	9444	QKI	QKI, KH domain containing RNA binding [Source:HGNC Symbol;Acc:HGNC:21100]
ENSG00000145476	366.583	1.59689	0.147099	3.619e-28	6.35045e-27	285440	CYP4V2	cytochrome P450 family 4 subfamily V member 2 [Source:HGNC Symbol;Acc:HGNC:23198]
ENSG00000229391	438.214	1.59617	0.123222	4.43298e-39	1.0846e-37	3128	HLA-DRB6	major histocompatibility complex, class II, DR beta 6 (pseudogene) [Source:HGNC Symbol;Acc:HGNC:4954]
ENSG00000092096	60.1568	1.59601	0.389369	7.07757e-06	3.21274e-05	51310	SLC22A17	solute carrier family 22 member 17 [Source:HGNC Symbol;Acc:HGNC:23095]
ENSG00000133466	88.8523	1.59542	0.257787	1.05419e-10	7.68302e-10	114904	C1QTNF6	C1q and TNF related 6 [Source:HGNC Symbol;Acc:HGNC:14343]
ENSG00000054277	79.1839	1.59455	0.27995	2.29396e-09	1.50536e-08	23596	OPN3	opsin 3 [Source:HGNC Symbol;Acc:HGNC:14007]
ENSG00000184232	6073.02	1.59213	0.0662196	2.04514e-128	2.18585e-126	220323	OAF	out at first homolog [Source:HGNC Symbol;Acc:HGNC:28752]
ENSG00000113916	590.037	1.58701	0.194617	6.14847e-17	6.55583e-16	604	BCL6	BCL6 transcription repressor [Source:HGNC Symbol;Acc:HGNC:1001]
ENSG00000178809	102.073	1.58608	0.256998	1.19367e-10	8.65718e-10	375593	TRIM73	tripartite motif containing 73 [Source:HGNC Symbol;Acc:HGNC:18162]
ENSG00000157985	937.251	1.58159	0.0978267	1.72877e-59	6.84705e-58	116987	AGAP1	ArfGAP with GTPase domain, ankyrin repeat and PH domain 1 [Source:HGNC Symbol;Acc:HGNC:16922]
ENSG00000253846	289.497	1.57877	0.147886	2.48575e-27	4.20976e-26	56106	PCDHGA10	protocadherin gamma subfamily A, 10 [Source:HGNC Symbol;Acc:HGNC:8697]
ENSG00000176641	91.1515	1.57796	0.388101	5.45732e-06	2.51196e-05	220441	RNF152	ring finger protein 152 [Source:HGNC Symbol;Acc:HGNC:26811]
ENSG00000187164	281.226	1.57758	0.160966	2.29354e-23	3.35514e-22	57698	SHTN1	shootin 1 [Source:HGNC Symbol;Acc:HGNC:29319]
ENSG00000248508	77.8841	1.57594	0.323935	1.81361e-07	9.84265e-07	100131089	SRP14-AS1	SRP14 antisense RNA1 (head to head) [Source:HGNC Symbol;Acc:HGNC:48619]
ENSG00000087245	6528.64	1.57337	0.0611769	1.46648e-146	1.97339e-144	4313	MMP2	matrix metallopeptidase 2 [Source:HGNC Symbol;Acc:HGNC:7166]
ENSG00000196208	103.08	1.57228	0.296859	2.09076e-08	1.24776e-07	9687	GREB1	growth regulating estrogen receptor binding 1 [Source:HGNC Symbol;Acc:HGNC:24885]
ENSG00000198715	1564.52	1.56954	0.078419	7.91455e-90	5.34124e-88	112770	GLMP	glycosylated lysosomal membrane protein [Source:HGNC Symbol;Acc:HGNC:29436]
ENSG00000197568	107.13	1.5693	0.240873	1.32505e-11	1.03893e-10	11147	HHLA3	HERV-H LTR-associating 3 [Source:HGNC Symbol;Acc:HGNC:4906]
ENSG00000213889	34.4752	1.56832	0.461627	9.4741e-05	0.000368955	147699	PPM1N	protein phosphatase, Mg2+/Mn2+ dependent 1N (putative) [Source:HGNC Symbol;Acc:HGNC:26845]
ENSG00000169213	63.918	1.56449	0.33208	3.9954e-07	2.09505e-06	5865	RAB3B	RAB3B, member RAS oncogene family [Source:HGNC Symbol;Acc:HGNC:9778]
ENSG00000156453	2235.34	1.5643	0.0774157	2.19884e-91	1.53015e-89	5097	PCDH1	protocadherin 1 [Source:HGNC Symbol;Acc:HGNC:8655]
ENSG00000114841	308.971	1.56341	0.192669	9.00828e-17	9.51428e-16	25981	DNAH1	dynein axonemal heavy chain 1 [Source:HGNC Symbol;Acc:HGNC:2940]
ENSG00000143369	656.695	1.56167	0.102908	1.02039e-52	3.39693e-51	1893	ECM1	extracellular matrix protein 1 [Source:HGNC Symbol;Acc:HGNC:3153]
ENSG00000049860	1765.15	1.55603	0.0790142	5.30142e-87	3.46266e-85	3074	HEXB	hexosaminidase subunit beta [Source:HGNC Symbol;Acc:HGNC:4879]
ENSG00000033100	1690.06	1.55484	0.0778346	1.42676e-89	9.59968e-88	54480	CHPF2	chondroitin polymerizing factor 2 [Source:HGNC Symbol;Acc:HGNC:29270]
ENSG00000014914	86.2302	1.55323	0.293057	2.04107e-08	1.21875e-07	10903	MTMR11	myotubularin related protein 11 [Source:HGNC Symbol;Acc:HGNC:24307]
ENSG00000197769	36.9797	1.55248	0.412949	3.1102e-05	0.000129715	440738	MAP1LC3C	microtubule associated protein 1 light chain 3 gamma [Source:HGNC Symbol;Acc:HGNC:13353]
ENSG00000100439	194.475	1.55165	0.198984	1.06718e-15	1.07429e-14	63874	ABHD4	abhydrolase domain containing 4, N-acyl phospholipase B [Source:HGNC Symbol;Acc:HGNC:20154]
ENSG00000198133	583.873	1.55149	0.112354	4.56233e-44	1.24894e-42	161145	TMEM229B	transmembrane protein 229B [Source:HGNC Symbol;Acc:HGNC:20130]
ENSG00000237441	1026.25	1.55142	0.096121	3.43028e-59	1.34431e-57	5863	RGL2	ral guanine nucleotide dissociation stimulator like 2 [Source:HGNC Symbol;Acc:HGNC:9769]
ENSG00000122042	752.741	1.55081	0.101961	6.80339e-53	2.27506e-51	5412	UBL3	ubiquitin like 3 [Source:HGNC Symbol;Acc:HGNC:12504]
ENSG00000135929	230.974	1.54995	0.171696	3.5806e-20	4.49345e-19	1593	CYP27A1	cytochrome P450 family 27 subfamily A member 1 [Source:HGNC Symbol;Acc:HGNC:2605]
ENSG00000168938	412.681	1.54741	0.124962	6.00423e-36	1.35477e-34	5480	PPIC	peptidylprolyl isomerase C [Source:HGNC Symbol;Acc:HGNC:9256]
ENSG00000105711	255.29	1.54636	0.158774	4.10236e-23	5.9198e-22	6324	SCN1B	sodium voltage-gated channel beta subunit 1 [Source:HGNC Symbol;Acc:HGNC:10586]
ENSG00000175746	32.6314	1.54507	0.486121	0.000216637	0.000800401	400360	C15orf54	chromosome 15 putative open reading frame 54 [Source:HGNC Symbol;Acc:HGNC:33797]
ENSG00000197497	35.0942	1.54311	0.472442	0.000167351	0.00062966	79788	ZNF665	zinc finger protein 665 [Source:HGNC Symbol;Acc:HGNC:25885]
ENSG00000175183	410.066	1.54234	0.140026	7.44529e-29	1.338e-27	1466	CSRP2	cysteine and glycine rich protein 2 [Source:HGNC Symbol;Acc:HGNC:2470]
ENSG00000166046	100.392	1.54229	0.23872	2.04475e-11	1.57938e-10	255394	TCP11L2	t-complex 11 like 2 [Source:HGNC Symbol;Acc:HGNC:28627]
ENSG00000126785	172.483	1.54136	0.243091	4.04013e-11	3.05306e-10	57381	RHOJ	ras homolog family member J [Source:HGNC Symbol;Acc:HGNC:688]
ENSG00000143507	412.478	1.54069	0.175751	3.79396e-19	4.50316e-18	11221	DUSP10	dual specificity phosphatase 10 [Source:HGNC Symbol;Acc:HGNC:3065]
ENSG00000197380	64.3918	1.53731	0.314999	1.94401e-07	1.05171e-06	147906	DACT3	dishevelled binding antagonist of beta catenin 3 [Source:HGNC Symbol;Acc:HGNC:30745]
ENSG00000138835	683.014	1.53678	0.16875	1.64198e-20	2.08638e-19	5998	RGS3	regulator of G protein signaling 3 [Source:HGNC Symbol;Acc:HGNC:9999]
ENSG00000214655	1950.93	1.53521	0.0864942	5.96378e-71	2.94082e-69	23053	ZSWIM8	zinc finger SWIM-type containing 8 [Source:HGNC Symbol;Acc:HGNC:23528]
ENSG00000110841	5131.05	1.53368	0.0702908	3.07295e-106	2.61999e-104	8496	PPFIBP1	PPFIA binding protein 1 [Source:HGNC Symbol;Acc:HGNC:9249]
ENSG00000113212	190.422	1.53165	0.183577	1.6003e-17	1.7575e-16	56129	PCDHB7	protocadherin beta 7 [Source:HGNC Symbol;Acc:HGNC:8692]
ENSG00000168264	2289.72	1.53151	0.113628	4.31122e-42	1.14375e-40	359948	IRF2BP2	interferon regulatory factor 2 binding protein 2 [Source:HGNC Symbol;Acc:HGNC:21729]
ENSG00000114268	1644.06	1.5315	0.0934517	4.28198e-61	1.75829e-59	5210	PFKFB4	6-phosphofructo-2-kinase/fructose-2,6-biphosphatase 4 [Source:HGNC Symbol;Acc:HGNC:8875]
ENSG00000144115	408.808	1.53073	0.132359	1.4137e-31	2.79958e-30	55258	THNSL2	threonine synthase like 2 [Source:HGNC Symbol;Acc:HGNC:25602]
ENSG00000213977	983.074	1.52805	0.0917387	6.28969e-63	2.67109e-61	30851	TAX1BP3	Tax1 binding protein 3 [Source:HGNC Symbol;Acc:HGNC:30684]
ENSG00000076641	214.184	1.52514	0.173648	3.42237e-19	4.07076e-18	55824	PAG1	phosphoprotein membrane anchor with glycosphingolipid microdomains 1 [Source:HGNC Symbol;Acc:HGNC:30043]
ENSG00000215067	62.339	1.52444	0.306599	1.27614e-07	7.02303e-07	100506713	ALOX12-AS1	ALOX12 antisense RNA 1 [Source:HGNC Symbol;Acc:HGNC:51342]
ENSG00000154229	954.239	1.51999	0.0892929	1.38087e-65	6.13239e-64	5578	PRKCA	protein kinase C alpha [Source:HGNC Symbol;Acc:HGNC:9393]
ENSG00000090971	1004.99	1.51956	0.101436	2.55198e-51	8.29785e-50	57106	NAT14	N-acetyltransferase 14 (putative) [Source:HGNC Symbol;Acc:HGNC:28918]
ENSG00000161958	61.6821	1.51941	0.308486	1.66979e-07	9.0975e-07	2256	FGF11	fibroblast growth factor 11 [Source:HGNC Symbol;Acc:HGNC:3667]
ENSG00000171033	110.238	1.51834	0.250461	2.51262e-10	1.78011e-09	5569	PKIA	cAMP-dependent protein kinase inhibitor alpha [Source:HGNC Symbol;Acc:HGNC:9017]
ENSG00000154889	201.688	1.51796	0.227414	5.41487e-12	4.36985e-11	65258	MPPE1	metallophosphoesterase 1 [Source:HGNC Symbol;Acc:HGNC:15988]
ENSG00000164010	149.233	1.51746	0.246301	1.08296e-10	7.88497e-10	114625	ERMAP	erythroblast membrane associated protein (Scianna blood group) [Source:HGNC Symbol;Acc:HGNC:15743]
ENSG00000105808	718.403	1.51726	0.115499	3.24825e-40	8.20809e-39	10156	RASA4	RAS p21 protein activator 4 [Source:HGNC Symbol;Acc:HGNC:23181]
ENSG00000103196	63.3298	1.51648	0.314027	2.43268e-07	1.3044e-06	83716	CRISPLD2	cysteine rich secretory protein LCCL domain containing 2 [Source:HGNC Symbol;Acc:HGNC:25248]
ENSG00000162458	82.4802	1.51574	0.293205	4.60552e-08	2.6556e-07	54751	FBLIM1	filamin binding LIM protein 1 [Source:HGNC Symbol;Acc:HGNC:24686]
ENSG00000179528	185.998	1.51351	0.19534	1.70521e-15	1.70354e-14	85474	LBX2	ladybird homeobox 2 [Source:HGNC Symbol;Acc:HGNC:15525]
ENSG00000223891	92.5688	1.51061	0.254156	5.04146e-10	3.46938e-09	100505783	OSER1-DT	OSER1 divergent transcript [Source:HGNC Symbol;Acc:HGNC:48585]
ENSG00000167555	76.4934	1.51038	0.373978	1.02627e-05	4.55943e-05	84436	ZNF528	zinc finger protein 528 [Source:HGNC Symbol;Acc:HGNC:29384]
ENSG00000144455	345.604	1.50726	0.13893	4.34302e-28	7.59705e-27	285362	SUMF1	sulfatase modifying factor 1 [Source:HGNC Symbol;Acc:HGNC:20376]
ENSG00000010295	716.441	1.5048	0.100061	7.51495e-52	2.46866e-50	25900	IFFO1	intermediate filament family orphan 1 [Source:HGNC Symbol;Acc:HGNC:24970]
ENSG00000125744	277.211	1.50425	0.164125	8.90513e-21	1.14852e-19	6253	RTN2	reticulon 2 [Source:HGNC Symbol;Acc:HGNC:10468]
ENSG00000143409	444.098	1.50423	0.141975	6.90585e-27	1.14523e-25	55793	MINDY1	MINDY lysine 48 deubiquitinase 1 [Source:HGNC Symbol;Acc:HGNC:25648]
ENSG00000197013	61.933	1.50317	0.328488	9.84107e-07	4.93556e-06	353088	ZNF429	zinc finger protein 429 [Source:HGNC Symbol;Acc:HGNC:20817]
ENSG00000161265	207.613	1.50163	0.184342	7.70632e-17	8.17785e-16	199746	U2AF1L4	U2 small nuclear RNA auxiliary factor 1 like 4 [Source:HGNC Symbol;Acc:HGNC:23020]
ENSG00000274180	340.056	1.50108	0.144334	5.15998e-26	8.29235e-25	256302	NATD1	N-acetyltransferase domain containing 1 [Source:HGNC Symbol;Acc:HGNC:30770]
ENSG00000130518	47.995	1.50056	0.50327	0.000378816	0.00134681	80726	IQCN	IQ motif containing N [Source:HGNC Symbol;Acc:HGNC:29350]
ENSG00000111962	201.119	1.49991	0.181864	3.60518e-17	3.89234e-16	10090	UST	uronyl 2-sulfotransferase [Source:HGNC Symbol;Acc:HGNC:17223]
ENSG00000063660	1475.95	1.49922	0.0950233	1.07679e-56	3.9175e-55	2817	GPC1	glypican 1 [Source:HGNC Symbol;Acc:HGNC:4449]
ENSG00000165895	119.786	1.49619	0.321691	6.36198e-07	3.26099e-06	143872	ARHGAP42	Rho GTPase activating protein 42 [Source:HGNC Symbol;Acc:HGNC:26545]
ENSG00000101096	4504.48	1.49496	0.05642	2.42667e-155	3.58986e-153	4773	NFATC2	nuclear factor of activated T cells 2 [Source:HGNC Symbol;Acc:HGNC:7776]
ENSG00000185946	159.607	1.49466	0.192342	1.78653e-15	1.78158e-14	55599	RNPC3	RNA binding region (RNP1, RRM) containing 3 [Source:HGNC Symbol;Acc:HGNC:18666]
ENSG00000138760	2623.18	1.49255	0.0808803	9.97511e-77	5.43473e-75	950	SCARB2	scavenger receptor class B member 2 [Source:HGNC Symbol;Acc:HGNC:1665]
ENSG00000110011	479.501	1.49227	0.122135	4.75225e-35	1.04897e-33	3338	DNAJC4	DnaJ heat shock protein family (Hsp40) member C4 [Source:HGNC Symbol;Acc:HGNC:5271]
ENSG00000249378	143.226	1.49218	0.225011	6.85319e-12	5.49288e-11	401164	LINC01060	long intergenic non-protein coding RNA 1060 [Source:HGNC Symbol;Acc:HGNC:49081]
ENSG00000232629	178.012	1.49025	0.207743	1.41017e-13	1.25951e-12	3120	HLA-DQB2	major histocompatibility complex, class II, DQ beta 2 [Source:HGNC Symbol;Acc:HGNC:4945]
ENSG00000206337	83.199	1.49015	0.312595	3.6531e-07	1.92233e-06	10866	HCP5	HLA complex P5 [Source:HGNC Symbol;Acc:HGNC:21659]
ENSG00000168734	566.497	1.49	0.107664	3.25705e-44	8.97113e-43	11142	PKIG	cAMP-dependent protein kinase inhibitor gamma [Source:HGNC Symbol;Acc:HGNC:9019]
ENSG00000168071	43.6501	1.48949	0.386084	2.22763e-05	9.48186e-05	283234	CCDC88B	coiled-coil domain containing 88B [Source:HGNC Symbol;Acc:HGNC:26757]
ENSG00000013392	66.608	1.48941	0.290952	6.4497e-08	3.66412e-07	112611	RWDD2A	RWD domain containing 2A [Source:HGNC Symbol;Acc:HGNC:21385]
ENSG00000124257	61.0877	1.48874	0.345649	3.02583e-06	1.4305e-05	140825	NEURL2	neuralized E3 ubiquitin protein ligase 2 [Source:HGNC Symbol;Acc:HGNC:16156]
ENSG00000136378	396.967	1.4859	0.136192	2.22485e-28	3.93809e-27	11173	ADAMTS7	ADAM metallopeptidase with thrombospondin type 1 motif 7 [Source:HGNC Symbol;Acc:HGNC:223]
ENSG00000159640	44.5993	1.48256	0.423217	7.08361e-05	0.000280706	1636	ACE	angiotensin I converting enzyme [Source:HGNC Symbol;Acc:HGNC:2707]
ENSG00000111961	1133.01	1.48239	0.110221	7.52453e-42	1.97745e-40	23328	SASH1	SAM and SH3 domain containing 1 [Source:HGNC Symbol;Acc:HGNC:19182]
ENSG00000169604	1549.58	1.48174	0.080823	1.08693e-75	5.82252e-74	84168	ANTXR1	ANTXR cell adhesion molecule 1 [Source:HGNC Symbol;Acc:HGNC:21014]
ENSG00000135828	231.36	1.48012	0.177575	1.80479e-17	1.97624e-16	6041	RNASEL	ribonuclease L [Source:HGNC Symbol;Acc:HGNC:10050]
ENSG00000198464	173.572	1.47753	0.183101	1.41807e-16	1.48023e-15	147657	ZNF480	zinc finger protein 480 [Source:HGNC Symbol;Acc:HGNC:23305]
ENSG00000105429	3966.72	1.47706	0.0737448	5.75367e-90	3.89471e-88	1954	MEGF8	multiple EGF like domains 8 [Source:HGNC Symbol;Acc:HGNC:3233]
ENSG00000056558	485.707	1.47667	0.132013	1.06999e-29	1.97696e-28	7185	TRAF1	TNF receptor associated factor 1 [Source:HGNC Symbol;Acc:HGNC:12031]
ENSG00000120322	210.478	1.47593	0.171106	1.50311e-18	1.74152e-17	56128	PCDHB8	protocadherin beta 8 [Source:HGNC Symbol;Acc:HGNC:8693]
ENSG00000183397	152.078	1.47577	0.202018	5.93304e-14	5.42943e-13	100128569	C19orf71	chromosome 19 open reading frame 71 [Source:HGNC Symbol;Acc:HGNC:34496]
ENSG00000204592	2024.99	1.47468	0.0779663	1.75324e-80	1.03063e-78	3133	HLA-E	major histocompatibility complex, class I, E [Source:HGNC Symbol;Acc:HGNC:4962]
ENSG00000103260	3461.17	1.47337	0.0673882	1.19677e-106	1.02821e-104	79006	METRN	meteorin, glial cell differentiation regulator [Source:HGNC Symbol;Acc:HGNC:14151]
ENSG00000179314	36.3798	1.47323	0.555943	0.00105065	0.00348264	23302	WSCD1	WSC domain containing 1 [Source:HGNC Symbol;Acc:HGNC:29060]
ENSG00000143028	86.1895	1.47309	0.27045	1.12479e-08	6.87995e-08	284612	SYPL2	synaptophysin like 2 [Source:HGNC Symbol;Acc:HGNC:27638]
ENSG00000159216	1432.8	1.47192	0.0819578	1.08e-72	5.48297e-71	861	RUNX1	RUNX family transcription factor 1 [Source:HGNC Symbol;Acc:HGNC:10471]
ENSG00000064687	299.761	1.47005	0.16649	1.91782e-19	2.3082e-18	10347	ABCA7	ATP binding cassette subfamily A member 7 [Source:HGNC Symbol;Acc:HGNC:37]
ENSG00000165030	156.425	1.46992	0.243426	2.99495e-10	2.10381e-09	4783	NFIL3	nuclear factor, interleukin 3 regulated [Source:HGNC Symbol;Acc:HGNC:7787]
ENSG00000161551	81.3851	1.46844	0.397228	3.71143e-05	0.000153132	84765	ZNF577	zinc finger protein 577 [Source:HGNC Symbol;Acc:HGNC:28673]
ENSG00000285410	422.638	1.46839	0.139411	1.09849e-26	1.81495e-25	55056	GABPB1-IT1	GABPB1 intronic transcript [Source:HGNC Symbol;Acc:HGNC:25469]
ENSG00000105419	423.388	1.46806	0.128066	3.93087e-31	7.66211e-30	56917	MEIS3	Meis homeobox 3 [Source:HGNC Symbol;Acc:HGNC:29537]
ENSG00000163795	1031.48	1.46725	0.0918489	5.18411e-58	1.95283e-56	130557	ZNF513	zinc finger protein 513 [Source:HGNC Symbol;Acc:HGNC:26498]
ENSG00000272674	472.68	1.465	0.132498	4.58119e-29	8.28621e-28	57717	PCDHB16	protocadherin beta 16 [Source:HGNC Symbol;Acc:HGNC:14546]
ENSG00000135931	781.437	1.46292	0.124425	1.73329e-32	3.52305e-31	80210	ARMC9	armadillo repeat containing 9 [Source:HGNC Symbol;Acc:HGNC:20730]
ENSG00000177839	183.098	1.46182	0.280509	3.30762e-08	1.9362e-07	56127	PCDHB9	protocadherin beta 9 [Source:HGNC Symbol;Acc:HGNC:8694]
ENSG00000198001	239.783	1.46029	0.175678	1.90759e-17	2.08473e-16	51135	IRAK4	interleukin 1 receptor associated kinase 4 [Source:HGNC Symbol;Acc:HGNC:17967]
ENSG00000071967	473.494	1.46002	0.117415	4.20862e-36	9.54439e-35	79901	CYBRD1	cytochrome b reductase 1 [Source:HGNC Symbol;Acc:HGNC:20797]
ENSG00000170271	241.029	1.45951	0.162033	4.60799e-20	5.75368e-19	10826	FAXDC2	fatty acid hydroxylase domain containing 2 [Source:HGNC Symbol;Acc:HGNC:1334]
ENSG00000136147	102.691	1.45876	0.253031	1.56742e-09	1.04236e-08	51131	PHF11	PHD finger protein 11 [Source:HGNC Symbol;Acc:HGNC:17024]
ENSG00000125730	474.377	1.45676	0.172745	6.36086e-18	7.1294e-17	718	C3	complement C3 [Source:HGNC Symbol;Acc:HGNC:1318]
ENSG00000114698	65.4819	1.45597	0.332383	2.30679e-06	1.10744e-05	57088	PLSCR4	phospholipid scramblase 4 [Source:HGNC Symbol;Acc:HGNC:16497]
ENSG00000166340	1347.9	1.45342	0.090111	5.48816e-59	2.13208e-57	1200	TPP1	tripeptidyl peptidase 1 [Source:HGNC Symbol;Acc:HGNC:2073]
ENSG00000176533	358.556	1.4526	0.132985	2.16439e-28	3.83412e-27	2788	GNG7	G protein subunit gamma 7 [Source:HGNC Symbol;Acc:HGNC:4410]
ENSG00000129003	1000.11	1.45199	0.097686	1.42461e-50	4.53752e-49	54832	VPS13C	vacuolar protein sorting 13 homolog C [Source:HGNC Symbol;Acc:HGNC:23594]
ENSG00000135506	2634.68	1.45099	0.0665256	4.71062e-106	4.00098e-104	10956	OS9	OS9 endoplasmic reticulum lectin [Source:HGNC Symbol;Acc:HGNC:16994]
ENSG00000168754	165.846	1.44815	0.203589	2.32774e-13	2.04713e-12	51252	FAM178B	family with sequence similarity 178 member B [Source:HGNC Symbol;Acc:HGNC:28036]
ENSG00000182871	1734.34	1.44358	0.076871	2.24912e-79	1.28493e-77	80781	COL18A1	collagen type XVIII alpha 1 chain [Source:HGNC Symbol;Acc:HGNC:2195]
ENSG00000204962	71.249	1.44168	0.285569	9.42059e-08	5.25699e-07	56140	PCDHA8	protocadherin alpha 8 [Source:HGNC Symbol;Acc:HGNC:8674]
ENSG00000160161	70.2385	1.44079	0.292753	1.76651e-07	9.59635e-07	148113	CILP2	cartilage intermediate layer protein 2 [Source:HGNC Symbol;Acc:HGNC:24213]
ENSG00000019582	27641.4	1.43924	0.0519466	1.78227e-169	3.03911e-167	972	CD74	CD74 molecule [Source:HGNC Symbol;Acc:HGNC:1697]
ENSG00000222009	357.771	1.43916	0.136569	1.23257e-26	2.03348e-25	149478	BTBD19	BTB domain containing 19 [Source:HGNC Symbol;Acc:HGNC:27145]
ENSG00000122971	211.902	1.43735	0.171248	1.18939e-17	1.31593e-16	35	ACADS	acyl-CoA dehydrogenase short chain [Source:HGNC Symbol;Acc:HGNC:90]
ENSG00000055955	36.0967	1.43705	0.620779	0.00316413	0.00952564	3700	ITIH4	inter-alpha-trypsin inhibitor heavy chain 4 [Source:HGNC Symbol;Acc:HGNC:6169]
ENSG00000213918	193.748	1.43615	0.253399	2.67027e-09	1.74106e-08	1773	DNASE1	deoxyribonuclease 1 [Source:HGNC Symbol;Acc:HGNC:2956]
ENSG00000133135	164.212	1.43573	0.187754	4.37402e-15	4.27976e-14	79589	RNF128	ring finger protein 128 [Source:HGNC Symbol;Acc:HGNC:21153]
ENSG00000177854	67.2125	1.435	0.298229	3.21348e-07	1.6994e-06	8269	TMEM187	transmembrane protein 187 [Source:HGNC Symbol;Acc:HGNC:13705]
ENSG00000277363	594.519	1.43353	0.114182	7.85147e-37	1.81184e-35	80725	SRCIN1	SRC kinase signaling inhibitor 1 [Source:HGNC Symbol;Acc:HGNC:29506]
ENSG00000119801	600.565	1.43046	0.10922	7.91967e-40	1.98329e-38	51646	YPEL5	yippee like 5 [Source:HGNC Symbol;Acc:HGNC:18329]
ENSG00000105519	2184.58	1.43028	0.0733019	2.20368e-85	1.40245e-83	828	CAPS	calcyphosine [Source:HGNC Symbol;Acc:HGNC:1487]
ENSG00000160867	604.809	1.42953	0.118176	2.05488e-34	4.43068e-33	2264	FGFR4	fibroblast growth factor receptor 4 [Source:HGNC Symbol;Acc:HGNC:3691]
ENSG00000172456	49.5844	1.42885	0.334844	4.20415e-06	1.95814e-05	55277	FGGY	FGGY carbohydrate kinase domain containing [Source:HGNC Symbol;Acc:HGNC:25610]
ENSG00000128016	729.586	1.42837	0.322199	1.89693e-06	9.20966e-06	7538	ZFP36	ZFP36 ring finger protein [Source:HGNC Symbol;Acc:HGNC:12862]
ENSG00000225697	765.719	1.42743	0.0985332	3.77068e-48	1.13212e-46	65010	SLC26A6	solute carrier family 26 member 6 [Source:HGNC Symbol;Acc:HGNC:14472]
ENSG00000156510	162.051	1.42706	0.250706	2.83599e-09	1.84588e-08	80201	HKDC1	hexokinase domain containing 1 [Source:HGNC Symbol;Acc:HGNC:23302]
ENSG00000179344	726.413	1.42686	0.116941	8.16142e-35	1.7856e-33	3119	HLA-DQB1	major histocompatibility complex, class II, DQ beta 1 [Source:HGNC Symbol;Acc:HGNC:4944]
ENSG00000123933	1018.46	1.42609	0.0899605	2.87406e-57	1.05767e-55	10608	MXD4	MAX dimerization protein 4 [Source:HGNC Symbol;Acc:HGNC:13906]
ENSG00000164684	99.2584	1.42453	0.391835	4.90916e-05	0.000198158	619279	ZNF704	zinc finger protein 704 [Source:HGNC Symbol;Acc:HGNC:32291]
ENSG00000151883	319.117	1.42428	0.217366	1.15696e-11	9.11933e-11	79668	PARP8	poly(ADP-ribose) polymerase family member 8 [Source:HGNC Symbol;Acc:HGNC:26124]
ENSG00000246705	236.954	1.42358	0.167376	3.95489e-18	4.47994e-17	55766	H2AJ	H2A.J histone [Source:HGNC Symbol;Acc:HGNC:14456]
ENSG00000118432	200.353	1.42175	0.176436	1.8868e-16	1.95398e-15	1268	CNR1	cannabinoid receptor 1 [Source:HGNC Symbol;Acc:HGNC:2159]
ENSG00000140416	1530.56	1.4217	0.101476	3.66625e-45	1.03015e-43	7168	TPM1	tropomyosin 1 [Source:HGNC Symbol;Acc:HGNC:12010]
ENSG00000165868	321.62	1.42095	0.15963	1.02675e-19	1.25331e-18	259217	HSPA12A	heat shock protein family A (Hsp70) member 12A [Source:HGNC Symbol;Acc:HGNC:19022]
ENSG00000081853	100.962	1.42053	0.271077	3.78185e-08	2.20059e-07	56113	PCDHGA2	protocadherin gamma subfamily A, 2 [Source:HGNC Symbol;Acc:HGNC:8700]
ENSG00000197852	399.579	1.42006	0.139644	5.42213e-25	8.41692e-24	55924	INKA2	inka box actin regulator 2 [Source:HGNC Symbol;Acc:HGNC:28045]
ENSG00000047346	333.25	1.41946	0.140476	1.13329e-24	1.7387e-23	56204	FAM214A	family with sequence similarity 214 member A [Source:HGNC Symbol;Acc:HGNC:25609]
ENSG00000102575	266.462	1.41082	0.215143	1.04004e-11	8.23846e-11	54	ACP5	acid phosphatase 5, tartrate resistant [Source:HGNC Symbol;Acc:HGNC:124]
ENSG00000090238	350.789	1.40867	0.146608	1.60096e-22	2.24779e-21	83719	YPEL3	yippee like 3 [Source:HGNC Symbol;Acc:HGNC:18327]
ENSG00000081803	148.673	1.40816	0.20612	1.95694e-12	1.63052e-11	93664	CADPS2	calcium dependent secretion activator 2 [Source:HGNC Symbol;Acc:HGNC:16018]
ENSG00000146555	129.257	1.40734	0.281953	1.33016e-07	7.30769e-07	221935	SDK1	sidekick cell adhesion molecule 1 [Source:HGNC Symbol;Acc:HGNC:19307]
ENSG00000112144	380.163	1.40617	0.137287	3.41473e-25	5.33413e-24	22858	CILK1	ciliogenesis associated kinase 1 [Source:HGNC Symbol;Acc:HGNC:21219]
ENSG00000115255	168.097	1.40538	0.194644	1.13406e-13	1.01819e-12	92840	REEP6	receptor accessory protein 6 [Source:HGNC Symbol;Acc:HGNC:30078]
ENSG00000117984	5318.24	1.40334	0.0625946	5.77102e-112	5.24037e-110	1509	CTSD	cathepsin D [Source:HGNC Symbol;Acc:HGNC:2529]
ENSG00000006025	421.775	1.40317	0.162981	1.54792e-18	1.79251e-17	114881	OSBPL7	oxysterol binding protein like 7 [Source:HGNC Symbol;Acc:HGNC:16387]
ENSG00000162407	359.639	1.40025	0.145585	1.72658e-22	2.42111e-21	8613	PLPP3	phospholipid phosphatase 3 [Source:HGNC Symbol;Acc:HGNC:9229]
ENSG00000170379	184.72	1.39674	0.189437	4.2161e-14	3.89332e-13	285966	TCAF2	TRPM8 channel associated factor 2 [Source:HGNC Symbol;Acc:HGNC:26878]
ENSG00000077157	409.6	1.39638	0.38751	6.25245e-05	0.000249183	4660	PPP1R12B	protein phosphatase 1 regulatory subunit 12B [Source:HGNC Symbol;Acc:HGNC:7619]
ENSG00000188338	63.1699	1.39485	0.31544	2.01827e-06	9.77752e-06	10991	SLC38A3	solute carrier family 38 member 3 [Source:HGNC Symbol;Acc:HGNC:18044]
ENSG00000243749	136.878	1.39337	0.220324	6.10072e-11	4.55322e-10	100506144	TMEM35B	transmembrane protein 35B [Source:HGNC Symbol;Acc:HGNC:40021]
ENSG00000154553	265.161	1.3901	0.15901	4.66878e-19	5.50931e-18	27295	PDLIM3	PDZ and LIM domain 3 [Source:HGNC Symbol;Acc:HGNC:20767]
ENSG00000054983	329.091	1.38977	0.138829	3.23976e-24	4.9031e-23	2581	GALC	galactosylceramidase [Source:HGNC Symbol;Acc:HGNC:4115]
ENSG00000239779	1572.73	1.38908	0.0784167	7.59509e-71	3.72877e-69	23559	WBP1	WW domain binding protein 1 [Source:HGNC Symbol;Acc:HGNC:12737]
ENSG00000158467	317.253	1.38836	0.162144	2.89902e-18	3.30737e-17	23382	AHCYL2	adenosylhomocysteinase like 2 [Source:HGNC Symbol;Acc:HGNC:22204]
ENSG00000273033	67.113	1.38599	0.299784	7.76511e-07	3.93421e-06	100129550	LINC02035	long intergenic non-protein coding RNA 2035 [Source:HGNC Symbol;Acc:HGNC:52875]
ENSG00000230487	42.2677	1.38584	0.466102	0.000506741	0.00177007	114796	PSMG3-AS1	PSMG3 antisense RNA 1 (head to head) [Source:HGNC Symbol;Acc:HGNC:22230]
ENSG00000145022	512.288	1.38437	0.112861	3.28321e-35	7.29754e-34	6988	TCTA	T cell leukemia translocation altered [Source:HGNC Symbol;Acc:HGNC:11692]
ENSG00000213928	147.656	1.38334	0.209927	9.53294e-12	7.5674e-11	10379	IRF9	interferon regulatory factor 9 [Source:HGNC Symbol;Acc:HGNC:6131]
ENSG00000185133	76.4473	1.38266	0.274214	1.09833e-07	6.07442e-07	27124	INPP5J	inositol polyphosphate-5-phosphatase J [Source:HGNC Symbol;Acc:HGNC:8956]
ENSG00000143641	12899.8	1.3815	0.0555044	2.31647e-137	2.73785e-135	2590	GALNT2	polypeptide N-acetylgalactosaminyltransferase 2 [Source:HGNC Symbol;Acc:HGNC:4124]
ENSG00000250337	46.9193	1.38071	0.374708	4.75296e-05	0.000192305	643401	PURPL	p53 upregulated regulator of p53 levels [Source:HGNC Symbol;Acc:HGNC:48995]
ENSG00000204956	178.481	1.38049	0.186828	3.46167e-14	3.21258e-13	56114	PCDHGA1	protocadherin gamma subfamily A, 1 [Source:HGNC Symbol;Acc:HGNC:8696]
ENSG00000153531	101.452	1.37891	0.23803	1.58163e-09	1.05119e-08	113622	ADPRHL1	ADP-ribosylhydrolase like 1 [Source:HGNC Symbol;Acc:HGNC:21303]
ENSG00000196739	1463.64	1.37825	0.108385	1.18415e-37	2.79614e-36	85301	COL27A1	collagen type XXVII alpha 1 chain [Source:HGNC Symbol;Acc:HGNC:22986]
ENSG00000112761	37.4693	1.37641	0.398169	0.000114078	0.000439358	8838	CCN6	cellular communication network factor 6 [Source:HGNC Symbol;Acc:HGNC:12771]
ENSG00000185561	349.556	1.37613	0.150668	1.32296e-20	1.69257e-19	727910	TLCD2	TLC domain containing 2 [Source:HGNC Symbol;Acc:HGNC:33522]
ENSG00000203778	54.6041	1.37319	0.42442	0.000262423	0.000957219	619208	FAM229B	family with sequence similarity 229 member B [Source:HGNC Symbol;Acc:HGNC:33858]
ENSG00000145040	537.725	1.37228	0.111355	1.69664e-35	3.79375e-34	90226	UCN2	urocortin 2 [Source:HGNC Symbol;Acc:HGNC:18414]
ENSG00000150967	530.043	1.37051	0.114635	1.47002e-33	3.11549e-32	23457	ABCB9	ATP binding cassette subfamily B member 9 [Source:HGNC Symbol;Acc:HGNC:50]
ENSG00000123080	1291.72	1.36989	0.0924082	3.65394e-50	1.1496e-48	1031	CDKN2C	cyclin dependent kinase inhibitor 2C [Source:HGNC Symbol;Acc:HGNC:1789]
ENSG00000182718	10788	1.36875	0.0604895	6.67519e-114	6.18715e-112	302	ANXA2	annexin A2 [Source:HGNC Symbol;Acc:HGNC:537]
ENSG00000185479	38.7848	1.36774	0.392055	0.000102985	0.000399387	3854	KRT6B	keratin 6B [Source:HGNC Symbol;Acc:HGNC:6444]
ENSG00000151914	1766.16	1.36769	0.116261	1.23246e-32	2.51422e-31	667	DST	dystonin [Source:HGNC Symbol;Acc:HGNC:1090]
ENSG00000164096	633.638	1.36526	0.108373	6.58103e-37	1.52181e-35	401152	C4orf3	chromosome 4 open reading frame 3 [Source:HGNC Symbol;Acc:HGNC:19225]
ENSG00000173786	5913.53	1.36469	0.0564627	1.23342e-129	1.32463e-127	1267	CNP	2',3'-cyclic nucleotide 3' phosphodiesterase [Source:HGNC Symbol;Acc:HGNC:2158]
ENSG00000137509	800.828	1.36267	0.107549	2.07786e-37	4.86534e-36	5547	PRCP	prolylcarboxypeptidase [Source:HGNC Symbol;Acc:HGNC:9344]
ENSG00000063438	665.579	1.36177	0.101196	7.54854e-42	1.98143e-40	57491	AHRR	aryl-hydrocarbon receptor repressor [Source:HGNC Symbol;Acc:HGNC:346]
ENSG00000214783	83.0251	1.36118	0.350258	2.0901e-05	8.92879e-05	84820	POLR2J4	RNA polymerase II subunit J4, pseudogene [Source:HGNC Symbol;Acc:HGNC:28195]
ENSG00000197381	576.658	1.36016	0.147832	8.7515e-21	1.12935e-19	104	ADARB1	adenosine deaminase RNA specific B1 [Source:HGNC Symbol;Acc:HGNC:226]
ENSG00000006534	732.724	1.35756	0.100891	7.8474e-42	2.05746e-40	221	ALDH3B1	aldehyde dehydrogenase 3 family member B1 [Source:HGNC Symbol;Acc:HGNC:410]
ENSG00000213015	1093.29	1.35614	0.0862216	2.33375e-56	8.38123e-55	51157	ZNF580	zinc finger protein 580 [Source:HGNC Symbol;Acc:HGNC:29473]
ENSG00000166887	1699.18	1.35469	0.0733227	7.40867e-77	4.04633e-75	23339	VPS39	VPS39 subunit of HOPS complex [Source:HGNC Symbol;Acc:HGNC:20593]
ENSG00000035115	86.1301	1.35422	0.29034	7.36619e-07	3.74479e-06	26751	SH3YL1	SH3 and SYLF domain containing 1 [Source:HGNC Symbol;Acc:HGNC:29546]
ENSG00000110013	432.11	1.35072	0.128612	2.1261e-26	3.48188e-25	54414	SIAE	sialic acid acetylesterase [Source:HGNC Symbol;Acc:HGNC:18187]
ENSG00000117318	2783.03	1.3504	0.0808724	3.40265e-63	1.45331e-61	3399	ID3	inhibitor of DNA binding 3, HLH protein [Source:HGNC Symbol;Acc:HGNC:5362]
ENSG00000179583	1489.98	1.35032	0.0910646	2.48397e-50	7.85935e-49	4261	CIITA	class II major histocompatibility complex transactivator [Source:HGNC Symbol;Acc:HGNC:7067]
ENSG00000115363	99.6058	1.35005	0.275096	2.11705e-07	1.14312e-06	84141	EVA1A	eva-1 homolog A, regulator of programmed cell death [Source:HGNC Symbol;Acc:HGNC:25816]
ENSG00000185885	86.9822	1.34933	0.279414	3.26633e-07	1.72531e-06	8519	IFITM1	interferon induced transmembrane protein 1 [Source:HGNC Symbol;Acc:HGNC:5412]
ENSG00000184564	972.512	1.34914	0.103939	4.53363e-39	1.1068e-37	84189	SLITRK6	SLIT and NTRK like family member 6 [Source:HGNC Symbol;Acc:HGNC:23503]
ENSG00000068971	291.427	1.34721	0.186165	1.14272e-13	1.02556e-12	5526	PPP2R5B	protein phosphatase 2 regulatory subunit B'beta [Source:HGNC Symbol;Acc:HGNC:9310]
ENSG00000099785	225.338	1.34697	0.16472	7.71682e-17	8.18511e-16	51257	MARCHF2	membrane associated ring-CH-type finger 2 [Source:HGNC Symbol;Acc:HGNC:28038]
ENSG00000131171	320.178	1.3464	0.155176	1.10215e-18	1.28563e-17	6451	SH3BGRL	SH3 domain binding glutamate rich protein like [Source:HGNC Symbol;Acc:HGNC:10823]
ENSG00000198855	56.7547	1.3454	0.317704	5.03075e-06	2.3252e-05	11153	FICD	FIC domain protein adenylyltransferase [Source:HGNC Symbol;Acc:HGNC:18416]
ENSG00000005893	1419.24	1.34387	0.0817387	2.93593e-61	1.21225e-59	3920	LAMP2	lysosomal associated membrane protein 2 [Source:HGNC Symbol;Acc:HGNC:6501]
ENSG00000146373	271.292	1.34284	0.271673	1.69201e-07	9.2141e-07	154214	RNF217	ring finger protein 217 [Source:HGNC Symbol;Acc:HGNC:21487]
ENSG00000162736	2272.95	1.34208	0.073453	3.47334e-75	1.84732e-73	23385	NCSTN	nicastrin [Source:HGNC Symbol;Acc:HGNC:17091]
ENSG00000122877	44.6801	1.34125	0.678687	0.00770813	0.0213416	1959	EGR2	early growth response 2 [Source:HGNC Symbol;Acc:HGNC:3239]
ENSG00000110675	58.2704	1.34107	0.33776	1.69562e-05	7.33479e-05	55531	ELMOD1	ELMO domain containing 1 [Source:HGNC Symbol;Acc:HGNC:25334]
ENSG00000197355	416.142	1.34048	0.14136	5.38333e-22	7.40017e-21	91373	UAP1L1	UDP-N-acetylglucosamine pyrophosphorylase 1 like 1 [Source:HGNC Symbol;Acc:HGNC:28082]
ENSG00000160307	1072.29	1.34023	0.0843025	1.53833e-57	5.70816e-56	6285	S100B	S100 calcium binding protein B [Source:HGNC Symbol;Acc:HGNC:10500]
ENSG00000131116	550.686	1.33983	0.114284	2.50948e-32	5.06928e-31	126299	ZNF428	zinc finger protein 428 [Source:HGNC Symbol;Acc:HGNC:20804]
ENSG00000143333	214.401	1.33945	0.223124	4.98877e-10	3.43736e-09	6004	RGS16	regulator of G protein signaling 16 [Source:HGNC Symbol;Acc:HGNC:9997]
ENSG00000171621	292.658	1.33913	0.196909	2.22878e-12	1.84874e-11	80176	SPSB1	splA/ryanodine receptor domain and SOCS box containing 1 [Source:HGNC Symbol;Acc:HGNC:30628]
ENSG00000105136	75.2456	1.3391	0.305897	2.68542e-06	1.27904e-05	79744	ZNF419	zinc finger protein 419 [Source:HGNC Symbol;Acc:HGNC:20648]
ENSG00000061656	90.2166	1.33685	0.264464	1.04573e-07	5.79356e-07	6676	SPAG4	sperm associated antigen 4 [Source:HGNC Symbol;Acc:HGNC:11214]
ENSG00000183153	43.9349	1.33596	0.385281	0.000113646	0.000437846	125111	GJD3	gap junction protein delta 3 [Source:HGNC Symbol;Acc:HGNC:19147]
ENSG00000107902	187.986	1.33329	0.211141	7.37985e-11	5.44782e-10	64077	LHPP	phospholysine phosphohistidine inorganic pyrophosphate phosphatase [Source:HGNC Symbol;Acc:HGNC:30042]
ENSG00000006118	2542.17	1.33247	0.0773427	4.25872e-67	1.96552e-65	54972	TMEM132A	transmembrane protein 132A [Source:HGNC Symbol;Acc:HGNC:31092]
ENSG00000139631	252.031	1.33196	0.182755	8.34906e-14	7.58135e-13	51380	CSAD	cysteine sulfinic acid decarboxylase [Source:HGNC Symbol;Acc:HGNC:18966]
ENSG00000082014	400.804	1.33084	0.123916	1.75393e-27	2.98486e-26	6604	SMARCD3	SWI/SNF related, matrix associated, actin dependent regulator of chromatin, subfamily d, member 3 [Source:HGNC Symbol;Acc:HGNC:11108]
ENSG00000173517	670.305	1.3302	0.160838	3.27698e-17	3.54142e-16	79834	PEAK1	pseudopodium enriched atypical kinase 1 [Source:HGNC Symbol;Acc:HGNC:29431]
ENSG00000174405	367.08	1.32894	0.136819	6.89305e-23	9.83879e-22	3981	LIG4	DNA ligase 4 [Source:HGNC Symbol;Acc:HGNC:6601]
ENSG00000104774	2671.44	1.3286	0.0728772	7.80489e-75	4.11193e-73	4125	MAN2B1	mannosidase alpha class 2B member 1 [Source:HGNC Symbol;Acc:HGNC:6826]
ENSG00000196689	165.81	1.3281	0.199697	7.19374e-12	5.76297e-11	7442	TRPV1	transient receptor potential cation channel subfamily V member 1 [Source:HGNC Symbol;Acc:HGNC:12716]
ENSG00000106133	271.359	1.32779	0.19097	9.67125e-13	8.19562e-12	260294	NSUN5P2	NSUN5 pseudogene 2 [Source:HGNC Symbol;Acc:HGNC:16609]
ENSG00000196507	244.337	1.32736	0.173916	6.67869e-15	6.48646e-14	85012	TCEAL3	transcription elongation factor A like 3 [Source:HGNC Symbol;Acc:HGNC:28247]
ENSG00000100473	184.357	1.32482	0.178321	2.89807e-14	2.69963e-13	1690	COCH	cochlin [Source:HGNC Symbol;Acc:HGNC:2180]
ENSG00000172667	642.736	1.3234	0.116048	1.02037e-30	1.95313e-29	64393	ZMAT3	zinc finger matrin-type 3 [Source:HGNC Symbol;Acc:HGNC:29983]
ENSG00000198740	311.173	1.32011	0.156376	7.48823e-18	8.35866e-17	22834	ZNF652	zinc finger protein 652 [Source:HGNC Symbol;Acc:HGNC:29147]
ENSG00000187601	82.1936	1.31946	0.277922	5.3693e-07	2.77188e-06	28986	MAGEH1	MAGE family member H1 [Source:HGNC Symbol;Acc:HGNC:24092]
ENSG00000039560	1236.02	1.31804	0.138262	4.15169e-22	5.73888e-21	26064	RAI14	retinoic acid induced 14 [Source:HGNC Symbol;Acc:HGNC:14873]
ENSG00000142798	6523.89	1.31675	0.103657	1.45668e-37	3.43242e-36	3339	HSPG2	heparan sulfate proteoglycan 2 [Source:HGNC Symbol;Acc:HGNC:5273]
ENSG00000100504	2761.3	1.31638	0.0725542	4.4939e-74	2.34544e-72	5836	PYGL	glycogen phosphorylase L [Source:HGNC Symbol;Acc:HGNC:9725]
ENSG00000116016	73.1198	1.31559	0.418356	0.000326639	0.00117288	2034	EPAS1	endothelial PAS domain protein 1 [Source:HGNC Symbol;Acc:HGNC:3374]
ENSG00000204176	42.1816	1.31501	0.436824	0.000586991	0.00202912	83849	SYT15	synaptotagmin 15 [Source:HGNC Symbol;Acc:HGNC:17167]
ENSG00000146833	609.715	1.3149	0.113441	1.18478e-31	2.3546e-30	89122	TRIM4	tripartite motif containing 4 [Source:HGNC Symbol;Acc:HGNC:16275]
ENSG00000102805	419.99	1.31455	0.134543	4.18219e-23	6.02721e-22	1203	CLN5	CLN5 intracellular trafficking protein [Source:HGNC Symbol;Acc:HGNC:2076]
ENSG00000040531	347.059	1.31408	0.153534	2.65918e-18	3.0353e-17	1497	CTNS	cystinosin, lysosomal cystine transporter [Source:HGNC Symbol;Acc:HGNC:2518]
ENSG00000272142	48.9666	1.31319	0.361941	6.66622e-05	0.000264917	100129461	LYRM4-AS1	LYRM4 antisense RNA 1 [Source:NCBI gene (formerly Entrezgene);Acc:100129461]
ENSG00000079950	265.827	1.30985	0.184352	2.8694e-13	2.51623e-12	8417	STX7	syntaxin 7 [Source:HGNC Symbol;Acc:HGNC:11442]
ENSG00000261408	58.0453	1.30973	0.425205	0.000444243	0.00156473	100529145	TEN1-CDK3	TEN1-CDK3 readthrough (NMD candidate) [Source:HGNC Symbol;Acc:HGNC:44420]
ENSG00000170667	168.339	1.30899	0.227396	2.02024e-09	1.33004e-08	100271927	RASA4B	RAS p21 protein activator 4B [Source:HGNC Symbol;Acc:HGNC:35202]
ENSG00000167103	100.399	1.30883	0.257315	8.48485e-08	4.75859e-07	138429	PIP5KL1	phosphatidylinositol-4-phosphate 5-kinase like 1 [Source:HGNC Symbol;Acc:HGNC:28711]
ENSG00000058668	3885.09	1.30806	0.0707056	5.66395e-77	3.10863e-75	493	ATP2B4	ATPase plasma membrane Ca2+ transporting 4 [Source:HGNC Symbol;Acc:HGNC:817]
ENSG00000231389	3066.88	1.30792	0.0717663	8.36129e-75	4.3947e-73	3113	HLA-DPA1	major histocompatibility complex, class II, DP alpha 1 [Source:HGNC Symbol;Acc:HGNC:4938]
ENSG00000173210	191.931	1.30704	0.192446	2.97078e-12	2.44785e-11	22885	ABLIM3	actin binding LIM protein family member 3 [Source:HGNC Symbol;Acc:HGNC:29132]
ENSG00000245532	3057.21	1.30511	0.247315	3.27062e-08	1.91505e-07	283131	NEAT1	nuclear paraspeckle assembly transcript 1 [Source:HGNC Symbol;Acc:HGNC:30815]
ENSG00000169372	142.179	1.30455	0.209719	1.19242e-10	8.65095e-10	8738	CRADD	CASP2 and RIPK1 domain containing adaptor with death domain [Source:HGNC Symbol;Acc:HGNC:2340]
ENSG00000186318	2061.94	1.30345	0.0692309	1.28354e-79	7.37064e-78	23621	BACE1	beta-secretase 1 [Source:HGNC Symbol;Acc:HGNC:933]
ENSG00000184304	338.769	1.30215	0.141753	1.04482e-20	1.34288e-19	5587	PRKD1	protein kinase D1 [Source:HGNC Symbol;Acc:HGNC:9407]
ENSG00000228203	142.859	1.30213	0.210046	1.55254e-10	1.11909e-09	386597	GRASLND	glycosaminoglycan regulatory associated long non-coding RNA [Source:HGNC Symbol;Acc:HGNC:30963]
ENSG00000010278	1303.17	1.30146	0.0804225	2.01665e-59	7.95901e-58	928	CD9	CD9 molecule [Source:HGNC Symbol;Acc:HGNC:1709]
ENSG00000106780	445.806	1.30104	0.129872	3.5177e-24	5.31654e-23	1955	MEGF9	multiple EGF like domains 9 [Source:HGNC Symbol;Acc:HGNC:3234]
ENSG00000225377	75.8302	1.30096	0.30002	3.37802e-06	1.58859e-05	100507459	NRSN2-AS1	NRSN2 antisense RNA 1 [Source:HGNC Symbol;Acc:HGNC:51222]
ENSG00000121653	698.235	1.30088	0.100162	3.87091e-39	9.50203e-38	9479	MAPK8IP1	mitogen-activated protein kinase 8 interacting protein 1 [Source:HGNC Symbol;Acc:HGNC:6882]
ENSG00000196220	159.082	1.29983	0.24886	4.56583e-08	2.63408e-07	9901	SRGAP3	SLIT-ROBO Rho GTPase activating protein 3 [Source:HGNC Symbol;Acc:HGNC:19744]
ENSG00000187837	165.359	1.29978	0.190945	2.52049e-12	2.08374e-11	3006	H1-2	H1.2 linker histone, cluster member [Source:HGNC Symbol;Acc:HGNC:4716]
ENSG00000162999	41.0183	1.29909	0.3972	0.000235362	0.000864156	142679	DUSP19	dual specificity phosphatase 19 [Source:HGNC Symbol;Acc:HGNC:18894]
ENSG00000166793	53.6747	1.29766	0.398681	0.000225538	0.000830815	219539	YPEL4	yippee like 4 [Source:HGNC Symbol;Acc:HGNC:18328]
ENSG00000167614	34.2518	1.29682	0.459207	0.00100476	0.00333994	57348	TTYH1	tweety family member 1 [Source:HGNC Symbol;Acc:HGNC:13476]
ENSG00000084764	369.155	1.29629	0.141256	1.28888e-20	1.64991e-19	22924	MAPRE3	microtubule associated protein RP/EB family member 3 [Source:HGNC Symbol;Acc:HGNC:6892]
ENSG00000243970	77.9563	1.29502	0.301693	4.47728e-06	2.07928e-05	728448	PPIEL	peptidylprolyl isomerase E like pseudogene [Source:HGNC Symbol;Acc:HGNC:33195]
ENSG00000105516	186.53	1.29404	0.211546	2.5647e-10	1.81528e-09	1628	DBP	D-box binding PAR bZIP transcription factor [Source:HGNC Symbol;Acc:HGNC:2697]
ENSG00000213614	1370.01	1.29374	0.0835799	1.307e-54	4.55471e-53	3073	HEXA	hexosaminidase subunit alpha [Source:HGNC Symbol;Acc:HGNC:4878]
ENSG00000138650	1104.8	1.29367	0.0869034	1.09971e-50	3.50935e-49	57575	PCDH10	protocadherin 10 [Source:HGNC Symbol;Acc:HGNC:13404]
ENSG00000072954	137.353	1.29292	0.224577	2.00817e-09	1.32248e-08	79041	TMEM38A	transmembrane protein 38A [Source:HGNC Symbol;Acc:HGNC:28462]
ENSG00000172465	114.286	1.29236	0.222328	1.60823e-09	1.06855e-08	9338	TCEAL1	transcription elongation factor A like 1 [Source:HGNC Symbol;Acc:HGNC:11616]
ENSG00000126775	261.191	1.2909	0.157446	6.38253e-17	6.79566e-16	22863	ATG14	autophagy related 14 [Source:HGNC Symbol;Acc:HGNC:19962]
ENSG00000172594	73.0263	1.29002	0.280708	1.06362e-06	5.31288e-06	10924	SMPDL3A	sphingomyelin phosphodiesterase acid like 3A [Source:HGNC Symbol;Acc:HGNC:17389]
ENSG00000157514	64.0116	1.28736	0.341756	3.74192e-05	0.000154362	1831	TSC22D3	TSC22 domain family member 3 [Source:HGNC Symbol;Acc:HGNC:3051]
ENSG00000156869	115.762	1.28646	0.223042	2.20931e-09	1.45066e-08	391059	FRRS1	ferric chelate reductase 1 [Source:HGNC Symbol;Acc:HGNC:27622]
ENSG00000115295	1055.02	1.2861	0.0950204	2.62488e-42	6.98863e-41	79745	CLIP4	CAP-Gly domain containing linker protein family member 4 [Source:HGNC Symbol;Acc:HGNC:26108]
ENSG00000102878	192.279	1.28446	0.202866	5.56313e-11	4.16591e-10	3299	HSF4	heat shock transcription factor 4 [Source:HGNC Symbol;Acc:HGNC:5227]
ENSG00000166900	667.952	1.28276	0.107313	1.53572e-33	3.25166e-32	6809	STX3	syntaxin 3 [Source:HGNC Symbol;Acc:HGNC:11438]
ENSG00000184005	166.676	1.28269	0.199344	2.98158e-11	2.27546e-10	256435	ST6GALNAC3	ST6 N-acetylgalactosaminide alpha-2,6-sialyltransferase 3 [Source:HGNC Symbol;Acc:HGNC:19343]
ENSG00000121417	115.875	1.28249	0.248282	5.98148e-08	3.41027e-07	10520	ZNF211	zinc finger protein 211 [Source:HGNC Symbol;Acc:HGNC:13003]
ENSG00000224870	358.741	1.28152	0.130041	1.7172e-23	2.52693e-22	148413	MRPL20-AS1	MRPL20 antisense RNA 1 [Source:HGNC Symbol;Acc:HGNC:27125]
ENSG00000196781	1045.9	1.28028	0.105319	1.64306e-34	3.55992e-33	7088	TLE1	TLE family member 1, transcriptional corepressor [Source:HGNC Symbol;Acc:HGNC:11837]
ENSG00000187372	136.597	1.27952	0.207878	2.08369e-10	1.48518e-09	56123	PCDHB13	protocadherin beta 13 [Source:HGNC Symbol;Acc:HGNC:8684]
ENSG00000165338	102.045	1.27884	0.256085	1.43924e-07	7.87984e-07	143279	HECTD2	HECT domain E3 ubiquitin protein ligase 2 [Source:HGNC Symbol;Acc:HGNC:26736]
ENSG00000155016	76.6427	1.27622	0.293228	3.64551e-06	1.71007e-05	113612	CYP2U1	cytochrome P450 family 2 subfamily U member 1 [Source:HGNC Symbol;Acc:HGNC:20582]
ENSG00000165795	288.911	1.27582	0.148351	2.15703e-18	2.47604e-17	57447	NDRG2	NDRG family member 2 [Source:HGNC Symbol;Acc:HGNC:14460]
ENSG00000184619	65.0401	1.2729	0.303041	6.28884e-06	2.87751e-05	124751	KRBA2	KRAB-A domain containing 2 [Source:HGNC Symbol;Acc:HGNC:26989]
ENSG00000167716	1126.05	1.27196	0.0949247	1.72189e-41	4.47251e-40	124997	WDR81	WD repeat domain 81 [Source:HGNC Symbol;Acc:HGNC:26600]
ENSG00000182220	1483.92	1.27174	0.0959524	1.22308e-40	3.11531e-39	10159	ATP6AP2	ATPase H+ transporting accessory protein 2 [Source:HGNC Symbol;Acc:HGNC:18305]
ENSG00000160781	545.456	1.27154	0.121879	4.38699e-26	7.08449e-25	79957	PAQR6	progestin and adipoQ receptor family member 6 [Source:HGNC Symbol;Acc:HGNC:30132]
ENSG00000177144	137.004	1.27104	0.233141	1.30333e-08	7.94376e-08	440672	NUDT4B	nudix hydrolase 4B [Source:HGNC Symbol;Acc:HGNC:18012]
ENSG00000177335	44.8481	1.26936	0.401741	0.000377314	0.00134168	286122	C8orf31	chromosome 8 open reading frame 31 [Source:HGNC Symbol;Acc:HGNC:26731]
ENSG00000270959	64.737	1.26527	0.292919	4.12517e-06	1.92295e-05	339929	LPP-AS2	LPP antisense RNA 2 [Source:HGNC Symbol;Acc:HGNC:27952]
ENSG00000102181	1119.23	1.2617	0.105541	1.84308e-33	3.8877e-32	83692	CD99L2	CD99 molecule like 2 [Source:HGNC Symbol;Acc:HGNC:18237]
ENSG00000119638	624.866	1.25997	0.116651	7.47777e-28	1.29588e-26	91754	NEK9	NIMA related kinase 9 [Source:HGNC Symbol;Acc:HGNC:18591]
ENSG00000171159	917.116	1.25985	0.102867	4.42835e-35	9.80382e-34	79095	C9orf16	chromosome 9 open reading frame 16 [Source:HGNC Symbol;Acc:HGNC:17823]
ENSG00000274512	191.861	1.25933	0.174946	1.75631e-13	1.55994e-12	101060376	TBC1D3L	TBC1 domain family member 3L [Source:HGNC Symbol;Acc:HGNC:51246]
ENSG00000186350	750.943	1.25863	0.0961922	1.13124e-39	2.81086e-38	6256	RXRA	retinoid X receptor alpha [Source:HGNC Symbol;Acc:HGNC:10477]
ENSG00000167703	171.82	1.25804	0.204347	1.93287e-10	1.38297e-09	124935	SLC43A2	solute carrier family 43 member 2 [Source:HGNC Symbol;Acc:HGNC:23087]
ENSG00000206530	103.386	1.25731	0.321934	2.37799e-05	0.000100815	55779	CFAP44	cilia and flagella associated protein 44 [Source:HGNC Symbol;Acc:HGNC:25631]
ENSG00000115641	370.185	1.2571	0.141394	1.76443e-19	2.13048e-18	2274	FHL2	four and a half LIM domains 2 [Source:HGNC Symbol;Acc:HGNC:3703]
ENSG00000105223	2197.98	1.25431	0.069181	5.27381e-74	2.74607e-72	23646	PLD3	phospholipase D family member 3 [Source:HGNC Symbol;Acc:HGNC:17158]
ENSG00000203814	38.1206	1.25403	0.451407	0.00129739	0.00423391	440689	H2BC18	H2B clustered histone 18 [Source:HGNC Symbol;Acc:HGNC:24700]
ENSG00000118762	898.934	1.25368	0.0905203	3.71819e-44	1.02035e-42	5311	PKD2	polycystin 2, transient receptor potential cation channel [Source:HGNC Symbol;Acc:HGNC:9009]
ENSG00000092931	366.825	1.25297	0.150575	2.72822e-17	2.96127e-16	79157	MFSD11	major facilitator superfamily domain containing 11 [Source:HGNC Symbol;Acc:HGNC:25458]
ENSG00000135452	518.768	1.25065	0.11053	3.1237e-30	5.88837e-29	6302	TSPAN31	tetraspanin 31 [Source:HGNC Symbol;Acc:HGNC:10539]
ENSG00000275395	66.6214	1.25014	0.350975	8.81255e-05	0.000345098	8857	FCGBP	Fc fragment of IgG binding protein [Source:HGNC Symbol;Acc:HGNC:13572]
ENSG00000217128	308.157	1.24964	0.158602	9.79233e-16	9.86654e-15	96459	FNIP1	folliculin interacting protein 1 [Source:HGNC Symbol;Acc:HGNC:29418]
ENSG00000180229	760.382	1.24933	0.125412	5.51612e-24	8.26419e-23	283755	HERC2P3	hect domain and RLD 2 pseudogene 3 [Source:HGNC Symbol;Acc:HGNC:4871]
ENSG00000115317	790.813	1.24865	0.114275	2.37038e-28	4.19236e-27	27429	HTRA2	HtrA serine peptidase 2 [Source:HGNC Symbol;Acc:HGNC:14348]
ENSG00000131389	2058.72	1.24757	0.0850947	3.15641e-49	9.65863e-48	6533	SLC6A6	solute carrier family 6 member 6 [Source:HGNC Symbol;Acc:HGNC:11052]
ENSG00000175294	114.447	1.24651	0.246402	1.24158e-07	6.83955e-07	117144	CATSPER1	cation channel sperm associated 1 [Source:HGNC Symbol;Acc:HGNC:17116]
ENSG00000277443	1902.55	1.24572	0.0716255	2.76735e-68	1.30968e-66	4082	MARCKS	myristoylated alanine rich protein kinase C substrate [Source:HGNC Symbol;Acc:HGNC:6759]
ENSG00000063180	161.358	1.24547	0.194484	4.15423e-11	3.13716e-10	770	CA11	carbonic anhydrase 11 [Source:HGNC Symbol;Acc:HGNC:1370]
ENSG00000171729	108.43	1.24423	0.234874	3.21071e-08	1.88244e-07	55092	TMEM51	transmembrane protein 51 [Source:HGNC Symbol;Acc:HGNC:25488]
ENSG00000213983	361.707	1.24096	0.188399	1.02396e-11	8.11683e-11	8906	AP1G2	adaptor related protein complex 1 subunit gamma 2 [Source:HGNC Symbol;Acc:HGNC:556]
ENSG00000136040	36.9833	1.24077	0.399747	0.000468237	0.00164354	10154	PLXNC1	plexin C1 [Source:HGNC Symbol;Acc:HGNC:9106]
ENSG00000177628	1301.17	1.24042	0.0922196	9.87324e-42	2.58253e-40	2629	GBA	glucosylceramidase beta [Source:HGNC Symbol;Acc:HGNC:4177]
ENSG00000177042	158.416	1.23972	0.201124	1.97266e-10	1.40919e-09	283232	TMEM80	transmembrane protein 80 [Source:HGNC Symbol;Acc:HGNC:27453]
ENSG00000177548	492.646	1.23866	0.148748	2.41312e-17	2.6218e-16	79874	RABEP2	rabaptin, RAB GTPase binding effector protein 2 [Source:HGNC Symbol;Acc:HGNC:24817]
ENSG00000114948	771.041	1.23862	0.114043	4.84304e-28	8.45847e-27	8745	ADAM23	ADAM metallopeptidase domain 23 [Source:HGNC Symbol;Acc:HGNC:202]
ENSG00000006756	410.321	1.23849	0.177796	9.74625e-13	8.25291e-12	414	ARSD	arylsulfatase D [Source:HGNC Symbol;Acc:HGNC:717]
ENSG00000164506	212.99	1.23777	0.200892	1.74399e-10	1.25143e-09	134957	STXBP5	syntaxin binding protein 5 [Source:HGNC Symbol;Acc:HGNC:19665]
ENSG00000139278	87.1512	1.23658	0.364465	0.000146171	0.000556058	11010	GLIPR1	GLI pathogenesis related 1 [Source:HGNC Symbol;Acc:HGNC:17001]
ENSG00000160325	205.967	1.23608	0.293374	5.48488e-06	2.52399e-05	11094	CACFD1	calcium channel flower domain containing 1 [Source:HGNC Symbol;Acc:HGNC:1365]
ENSG00000180628	572.637	1.2347	0.123786	5.90563e-24	8.84181e-23	84333	PCGF5	polycomb group ring finger 5 [Source:HGNC Symbol;Acc:HGNC:28264]
ENSG00000109686	555.323	1.23332	0.117246	1.97031e-26	3.22912e-25	152503	SH3D19	SH3 domain containing 19 [Source:HGNC Symbol;Acc:HGNC:30418]
ENSG00000227199	43.0012	1.23224	0.371961	0.000239166	0.000876967	93653	ST7-AS1	ST7 antisense RNA 1 [Source:HGNC Symbol;Acc:HGNC:16000]
ENSG00000166682	334.675	1.23205	0.145097	5.62599e-18	6.31841e-17	80975	TMPRSS5	transmembrane serine protease 5 [Source:HGNC Symbol;Acc:HGNC:14908]
ENSG00000167528	111.398	1.23021	0.29756	8.77844e-06	3.93998e-05	121274	ZNF641	zinc finger protein 641 [Source:HGNC Symbol;Acc:HGNC:31834]
ENSG00000106571	907.729	1.23002	0.0909316	2.88162e-42	7.66304e-41	2737	GLI3	GLI family zinc finger 3 [Source:HGNC Symbol;Acc:HGNC:4319]
ENSG00000168216	266.548	1.22806	0.149731	6.94519e-17	7.38418e-16	55788	LMBRD1	LMBR1 domain containing 1 [Source:HGNC Symbol;Acc:HGNC:23038]
ENSG00000109323	263.795	1.22795	0.180806	3.50064e-12	2.86962e-11	4126	MANBA	mannosidase beta [Source:HGNC Symbol;Acc:HGNC:6831]
ENSG00000117519	3303.14	1.22758	0.0753121	3.48813e-60	1.40646e-58	1266	CNN3	calponin 3 [Source:HGNC Symbol;Acc:HGNC:2157]
ENSG00000269293	42.759	1.22715	0.382221	0.000352409	0.00125974	100129195	ZSCAN16-AS1	ZSCAN16 antisense RNA 1 [Source:HGNC Symbol;Acc:HGNC:48982]
ENSG00000115841	68.5341	1.22539	0.306582	1.79958e-05	7.75743e-05	151393	RMDN2	regulator of microtubule dynamics 2 [Source:HGNC Symbol;Acc:HGNC:26567]
ENSG00000157680	35.6875	1.22469	0.704746	0.0120963	0.0319659	9162	DGKI	diacylglycerol kinase iota [Source:HGNC Symbol;Acc:HGNC:2855]
ENSG00000135482	197.648	1.22372	0.228679	2.62257e-08	1.55145e-07	84872	ZC3H10	zinc finger CCCH-type containing 10 [Source:HGNC Symbol;Acc:HGNC:25893]
ENSG00000179085	432.237	1.21901	0.14891	7.74305e-17	8.20902e-16	54344	DPM3	dolichyl-phosphate mannosyltransferase subunit 3, regulatory [Source:HGNC Symbol;Acc:HGNC:3007]
ENSG00000136156	2275.18	1.21891	0.0767589	2.84552e-57	1.0489e-55	9445	ITM2B	integral membrane protein 2B [Source:HGNC Symbol;Acc:HGNC:6174]
ENSG00000206503	4180.15	1.21863	0.0606674	3.03309e-90	2.05937e-88	3105	HLA-A	major histocompatibility complex, class I, A [Source:HGNC Symbol;Acc:HGNC:4931]
ENSG00000226985	349.825	1.21748	0.155407	1.48562e-15	1.48748e-14	100133123	LINC01203	long intergenic non-protein coding RNA 1203 [Source:HGNC Symbol;Acc:HGNC:49634]
ENSG00000162616	151.908	1.21742	0.269952	1.60334e-06	7.84735e-06	11080	DNAJB4	DnaJ heat shock protein family (Hsp40) member B4 [Source:HGNC Symbol;Acc:HGNC:14886]
ENSG00000146278	662.89	1.21738	0.13749	2.45897e-19	2.94208e-18	10957	PNRC1	proline rich nuclear receptor coactivator 1 [Source:HGNC Symbol;Acc:HGNC:17278]
ENSG00000138744	146.942	1.21695	0.201671	4.71999e-10	3.25517e-09	27163	NAAA	N-acylethanolamine acid amidase [Source:HGNC Symbol;Acc:HGNC:736]
ENSG00000107819	1694.01	1.21345	0.0744585	3.32721e-60	1.344e-58	81855	SFXN3	sideroflexin 3 [Source:HGNC Symbol;Acc:HGNC:16087]
ENSG00000173402	5490.41	1.21126	0.0624066	2.13199e-84	1.33029e-82	1605	DAG1	dystroglycan 1 [Source:HGNC Symbol;Acc:HGNC:2666]
ENSG00000166272	592.896	1.21104	0.11155	6.3619e-28	1.10593e-26	54838	WBP1L	WW domain binding protein 1 like [Source:HGNC Symbol;Acc:HGNC:23510]
ENSG00000134369	1634.11	1.21016	0.120099	1.99392e-24	3.04236e-23	89796	NAV1	neuron navigator 1 [Source:HGNC Symbol;Acc:HGNC:15989]
ENSG00000130429	5488.68	1.20995	0.0616549	3.05617e-86	1.96175e-84	10095	ARPC1B	actin related protein 2/3 complex subunit 1B [Source:HGNC Symbol;Acc:HGNC:704]
ENSG00000162604	293.034	1.20961	0.140148	1.88368e-18	2.16783e-17	83941	TM2D1	TM2 domain containing 1 [Source:HGNC Symbol;Acc:HGNC:24142]
ENSG00000143443	199.378	1.20893	0.181611	7.19533e-12	5.76297e-11	54964	C1orf56	chromosome 1 open reading frame 56 [Source:HGNC Symbol;Acc:HGNC:26045]
ENSG00000108840	1601.71	1.20589	0.0826259	9.50919e-49	2.88217e-47	10014	HDAC5	histone deacetylase 5 [Source:HGNC Symbol;Acc:HGNC:14068]
ENSG00000205220	351.158	1.2054	0.141311	4.04558e-18	4.57802e-17	5699	PSMB10	proteasome 20S subunit beta 10 [Source:HGNC Symbol;Acc:HGNC:9538]
ENSG00000102109	108.712	1.20513	0.244384	2.28641e-07	1.2301e-06	27344	PCSK1N	proprotein convertase subtilisin/kexin type 1 inhibitor [Source:HGNC Symbol;Acc:HGNC:17301]
ENSG00000151025	157.179	1.20476	0.218562	1.07293e-08	6.57893e-08	57512	GPR158	G protein-coupled receptor 158 [Source:HGNC Symbol;Acc:HGNC:23689]
ENSG00000141574	288.038	1.20426	0.161271	2.52483e-14	2.36179e-13	6398	SECTM1	secreted and transmembrane 1 [Source:HGNC Symbol;Acc:HGNC:10707]
ENSG00000105612	860.376	1.20271	0.0948384	2.07214e-37	4.85703e-36	1777	DNASE2	deoxyribonuclease 2, lysosomal [Source:HGNC Symbol;Acc:HGNC:2960]
ENSG00000013364	2173.77	1.20056	0.0699628	1.43882e-66	6.50616e-65	9961	MVP	major vault protein [Source:HGNC Symbol;Acc:HGNC:7531]
ENSG00000172057	407.766	1.1996	0.132894	6.04434e-20	7.4927e-19	94103	ORMDL3	ORMDL sphingolipid biosynthesis regulator 3 [Source:HGNC Symbol;Acc:HGNC:16038]
ENSG00000187650	123.569	1.19924	0.209754	3.1747e-09	2.05674e-08	400673	VMAC	vimentin type intermediate filament associated coiled-coil protein [Source:HGNC Symbol;Acc:HGNC:33803]
ENSG00000165240	292.41	1.19877	0.149644	3.2422e-16	3.33139e-15	538	ATP7A	ATPase copper transporting alpha [Source:HGNC Symbol;Acc:HGNC:869]
ENSG00000179603	66.1831	1.1979	0.3154	3.649e-05	0.00015064	2918	GRM8	glutamate metabotropic receptor 8 [Source:HGNC Symbol;Acc:HGNC:4600]
ENSG00000196628	297.692	1.19692	0.15802	1.17508e-14	1.12464e-13	6925	TCF4	transcription factor 4 [Source:HGNC Symbol;Acc:HGNC:11634]
ENSG00000163728	327.826	1.19592	0.137893	1.25905e-18	1.46406e-17	151613	TTC14	tetratricopeptide repeat domain 14 [Source:HGNC Symbol;Acc:HGNC:24697]
ENSG00000110900	685.59	1.19441	0.122536	5.89938e-23	8.44746e-22	441631	TSPAN11	tetraspanin 11 [Source:HGNC Symbol;Acc:HGNC:30795]
ENSG00000064651	1270.88	1.19316	0.100092	2.90255e-33	6.07659e-32	6558	SLC12A2	solute carrier family 12 member 2 [Source:HGNC Symbol;Acc:HGNC:10911]
ENSG00000174007	45.7967	1.19273	0.352783	0.000199992	0.000742591	84984	CEP19	centrosomal protein 19 [Source:HGNC Symbol;Acc:HGNC:28209]
ENSG00000116209	2540.33	1.19192	0.0709761	9.60802e-64	4.12738e-62	9528	TMEM59	transmembrane protein 59 [Source:HGNC Symbol;Acc:HGNC:1239]
ENSG00000198513	71.2081	1.19158	0.288961	1.0658e-05	4.72565e-05	51062	ATL1	atlastin GTPase 1 [Source:HGNC Symbol;Acc:HGNC:11231]
ENSG00000121064	680.821	1.1901	0.106176	1.00517e-29	1.86027e-28	59342	SCPEP1	serine carboxypeptidase 1 [Source:HGNC Symbol;Acc:HGNC:29507]
ENSG00000174586	104.913	1.18979	0.247712	4.35703e-07	2.27613e-06	162968	ZNF497	zinc finger protein 497 [Source:HGNC Symbol;Acc:HGNC:23714]
ENSG00000124299	1003.18	1.18945	0.0885434	1.16893e-41	3.05043e-40	5184	PEPD	peptidase D [Source:HGNC Symbol;Acc:HGNC:8840]
ENSG00000148572	239.378	1.18919	0.165934	2.24481e-13	1.97887e-12	29982	NRBF2	nuclear receptor binding factor 2 [Source:HGNC Symbol;Acc:HGNC:19692]
ENSG00000170703	33.8792	1.18866	0.575791	0.00737636	0.0205069	284076	TTLL6	tubulin tyrosine ligase like 6 [Source:HGNC Symbol;Acc:HGNC:26664]
ENSG00000115297	85.3708	1.18772	0.274313	3.90101e-06	1.82379e-05	3196	TLX2	T cell leukemia homeobox 2 [Source:HGNC Symbol;Acc:HGNC:5057]
ENSG00000183779	297.272	1.18708	0.158593	2.07617e-14	1.95192e-13	80139	ZNF703	zinc finger protein 703 [Source:HGNC Symbol;Acc:HGNC:25883]
ENSG00000240875	35.3481	1.18672	0.47331	0.00286723	0.00869983	730091	LINC00886	long intergenic non-protein coding RNA 886 [Source:HGNC Symbol;Acc:HGNC:48572]
ENSG00000089289	777.947	1.18659	0.100888	1.88749e-32	3.82949e-31	3476	IGBP1	immunoglobulin binding protein 1 [Source:HGNC Symbol;Acc:HGNC:5461]
ENSG00000143315	535.611	1.18457	0.110881	3.83416e-27	6.43966e-26	93183	PIGM	phosphatidylinositol glycan anchor biosynthesis class M [Source:HGNC Symbol;Acc:HGNC:18858]
ENSG00000161091	5713.31	1.18439	0.0560423	1.18572e-99	9.26104e-98	126321	MFSD12	major facilitator superfamily domain containing 12 [Source:HGNC Symbol;Acc:HGNC:28299]
ENSG00000149646	44.6217	1.18414	0.523557	0.00513367	0.014795	140894	CNBD2	cyclic nucleotide binding domain containing 2 [Source:HGNC Symbol;Acc:HGNC:16145]
ENSG00000153714	36.5607	1.18061	0.537186	0.00574217	0.0163693	286343	LURAP1L	leucine rich adaptor protein 1 like [Source:HGNC Symbol;Acc:HGNC:31452]
ENSG00000166888	1469.53	1.18027	0.0788579	3.75093e-51	1.21432e-49	6778	STAT6	signal transducer and activator of transcription 6 [Source:HGNC Symbol;Acc:HGNC:11368]
ENSG00000075420	1293.03	1.17802	0.0890176	1.89305e-40	4.79989e-39	64778	FNDC3B	fibronectin type III domain containing 3B [Source:HGNC Symbol;Acc:HGNC:24670]
ENSG00000174428	403.272	1.17264	0.150706	1.84628e-15	1.8387e-14	389524	GTF2IRD2B	GTF2I repeat domain containing 2B [Source:HGNC Symbol;Acc:HGNC:33125]
ENSG00000144445	74.7439	1.17178	0.278099	7.26921e-06	3.2917e-05	151050	KANSL1L	KAT8 regulatory NSL complex subunit 1 like [Source:HGNC Symbol;Acc:HGNC:26310]
ENSG00000182606	1100.89	1.17077	0.0978729	1.71351e-33	3.61781e-32	22906	TRAK1	trafficking kinesin protein 1 [Source:HGNC Symbol;Acc:HGNC:29947]
ENSG00000170581	821.462	1.17027	0.108738	1.82111e-27	3.09589e-26	6773	STAT2	signal transducer and activator of transcription 2 [Source:HGNC Symbol;Acc:HGNC:11363]
ENSG00000104936	1032.84	1.16975	0.136695	3.33971e-18	3.80237e-17	1760	DMPK	DM1 protein kinase [Source:HGNC Symbol;Acc:HGNC:2933]
ENSG00000267280	58.9862	1.16969	0.325267	9.46301e-05	0.000368587	103689912	TBX2-AS1	TBX2 antisense RNA 1 [Source:HGNC Symbol;Acc:HGNC:50355]
ENSG00000151726	422.839	1.16926	0.12597	4.73868e-21	6.20837e-20	2180	ACSL1	acyl-CoA synthetase long chain family member 1 [Source:HGNC Symbol;Acc:HGNC:3569]
ENSG00000031003	502.979	1.16843	0.110781	1.69618e-26	2.78598e-25	51306	FAM13B	family with sequence similarity 13 member B [Source:HGNC Symbol;Acc:HGNC:1335]
ENSG00000204291	50.3928	1.16777	0.330853	0.000121301	0.000465892	1306	COL15A1	collagen type XV alpha 1 chain [Source:HGNC Symbol;Acc:HGNC:2192]
ENSG00000255036	43.5821	1.16758	0.37916	0.000537148	0.00186665	57653	SUGT1P4-STRA6LP-CCDC180	SUGT1P4-STRA6LP-CCDC180 readthrough [Source:HGNC Symbol;Acc:HGNC:53835]
ENSG00000120899	66.3406	1.16517	0.291204	1.7966e-05	7.74757e-05	2185	PTK2B	protein tyrosine kinase 2 beta [Source:HGNC Symbol;Acc:HGNC:9612]
ENSG00000108813	45.1014	1.16399	0.370685	0.000484452	0.00169725	1748	DLX4	distal-less homeobox 4 [Source:HGNC Symbol;Acc:HGNC:2917]
ENSG00000239389	38.155	1.16306	0.403204	0.00101591	0.00337349	56136	PCDHA13	protocadherin alpha 13 [Source:HGNC Symbol;Acc:HGNC:8667]
ENSG00000143434	151.467	1.16263	0.213612	1.45018e-08	8.80035e-08	10500	SEMA6C	semaphorin 6C [Source:HGNC Symbol;Acc:HGNC:10740]
ENSG00000067445	46.4569	1.1626	0.399528	0.000881124	0.00295978	7216	TRO	trophinin [Source:HGNC Symbol;Acc:HGNC:12326]
ENSG00000071553	2036.47	1.16186	0.0750573	1.64554e-54	5.71666e-53	537	ATP6AP1	ATPase H+ transporting accessory protein 1 [Source:HGNC Symbol;Acc:HGNC:868]
ENSG00000163472	119.994	1.15986	0.23161	1.73246e-07	9.42055e-07	84283	TMEM79	transmembrane protein 79 [Source:HGNC Symbol;Acc:HGNC:28196]
ENSG00000134569	400.631	1.15842	0.138469	1.62155e-17	1.77909e-16	4038	LRP4	LDL receptor related protein 4 [Source:HGNC Symbol;Acc:HGNC:6696]
ENSG00000110852	96.7253	1.15825	0.243413	5.72527e-07	2.94748e-06	9976	CLEC2B	C-type lectin domain family 2 member B [Source:HGNC Symbol;Acc:HGNC:2053]
ENSG00000260231	53.4834	1.15436	0.343213	0.000213882	0.000790878	100134229	KDM7A-DT	KDM7A divergent transcript [Source:HGNC Symbol;Acc:HGNC:48959]
ENSG00000089847	32.9688	1.15351	0.541667	0.00601558	0.0170745	170961	ANKRD24	ankyrin repeat domain 24 [Source:HGNC Symbol;Acc:HGNC:29424]
ENSG00000121207	162.927	1.15335	0.191139	5.11114e-10	3.51192e-09	9227	LRAT	lecithin retinol acyltransferase [Source:HGNC Symbol;Acc:HGNC:6685]
ENSG00000164220	97.4697	1.15262	0.236728	3.42992e-07	1.80915e-06	2151	F2RL2	coagulation factor II thrombin receptor like 2 [Source:HGNC Symbol;Acc:HGNC:3539]
ENSG00000105520	1292.63	1.15241	0.0786101	3.60598e-49	1.10192e-47	64748	PLPPR2	phospholipid phosphatase related 2 [Source:HGNC Symbol;Acc:HGNC:29566]
ENSG00000256683	47.974	1.15188	0.360105	0.000388676	0.00138054	59348	ZNF350	zinc finger protein 350 [Source:HGNC Symbol;Acc:HGNC:16656]
ENSG00000046647	193.799	1.15082	0.195608	1.24602e-09	8.35088e-09	54960	GEMIN8	gem nuclear organelle associated protein 8 [Source:HGNC Symbol;Acc:HGNC:26044]
ENSG00000164176	118.966	1.15023	0.275062	7.25746e-06	3.28771e-05	10085	EDIL3	EGF like repeats and discoidin domains 3 [Source:HGNC Symbol;Acc:HGNC:3173]
ENSG00000167619	53.6626	1.14895	0.429836	0.00195163	0.00614886	284339	TMEM145	transmembrane protein 145 [Source:HGNC Symbol;Acc:HGNC:26912]
ENSG00000095015	359.27	1.1486	0.135201	6.50574e-18	7.27353e-17	4214	MAP3K1	mitogen-activated protein kinase kinase kinase 1 [Source:HGNC Symbol;Acc:HGNC:6848]
ENSG00000130653	191.451	1.1468	0.192644	7.99705e-10	5.43799e-09	375775	PNPLA7	patatin like phospholipase domain containing 7 [Source:HGNC Symbol;Acc:HGNC:24768]
ENSG00000133460	196.351	1.14655	0.173113	1.13121e-11	8.92899e-11	66035	SLC2A11	solute carrier family 2 member 11 [Source:HGNC Symbol;Acc:HGNC:14239]
ENSG00000132669	264.965	1.14536	0.174873	1.89928e-11	1.4716e-10	54453	RIN2	Ras and Rab interactor 2 [Source:HGNC Symbol;Acc:HGNC:18750]
ENSG00000054654	473.24	1.14413	0.148533	4.49461e-15	4.39582e-14	23224	SYNE2	spectrin repeat containing nuclear envelope protein 2 [Source:HGNC Symbol;Acc:HGNC:17084]
ENSG00000112679	242.325	1.1441	0.191563	8.01142e-10	5.44611e-09	56940	DUSP22	dual specificity phosphatase 22 [Source:HGNC Symbol;Acc:HGNC:16077]
ENSG00000099219	343.171	1.14408	0.140694	1.35686e-16	1.41766e-15	79956	ERMP1	endoplasmic reticulum metallopeptidase 1 [Source:HGNC Symbol;Acc:HGNC:23703]
ENSG00000161955	45.4221	1.14367	0.348109	0.000287617	0.00104316	8741	TNFSF13	TNF superfamily member 13 [Source:HGNC Symbol;Acc:HGNC:11928]
ENSG00000064547	219.854	1.1435	0.187659	3.17056e-10	2.21532e-09	9170	LPAR2	lysophosphatidic acid receptor 2 [Source:HGNC Symbol;Acc:HGNC:3168]
ENSG00000119711	299.924	1.14299	0.140966	1.65804e-16	1.72187e-15	4329	ALDH6A1	aldehyde dehydrogenase 6 family member A1 [Source:HGNC Symbol;Acc:HGNC:7179]
ENSG00000141933	528.674	1.14271	0.117815	9.43951e-23	1.33964e-21	91978	TPGS1	tubulin polyglutamylase complex subunit 1 [Source:HGNC Symbol;Acc:HGNC:25058]
ENSG00000087074	2914.46	1.14209	0.283891	1.72137e-05	7.43895e-05	23645	PPP1R15A	protein phosphatase 1 regulatory subunit 15A [Source:HGNC Symbol;Acc:HGNC:14375]
ENSG00000162341	332.357	1.13924	0.151544	1.82253e-14	1.72361e-13	219931	TPCN2	two pore segment channel 2 [Source:HGNC Symbol;Acc:HGNC:20820]
ENSG00000102796	36.0511	1.13872	0.441538	0.00271586	0.00827403	79758	DHRS12	dehydrogenase/reductase 12 [Source:HGNC Symbol;Acc:HGNC:25832]
ENSG00000168970	270.379	1.13858	0.185757	2.86864e-10	2.01889e-09	8681	JMJD7-PLA2G4B	JMJD7-PLA2G4B readthrough [Source:HGNC Symbol;Acc:HGNC:34449]
ENSG00000166206	145.4	1.13824	0.24036	5.94499e-07	3.05567e-06	2562	GABRB3	gamma-aminobutyric acid type A receptor subunit beta3 [Source:HGNC Symbol;Acc:HGNC:4083]
ENSG00000197622	1796.8	1.13769	0.0773795	2.28943e-49	7.04424e-48	56882	CDC42SE1	CDC42 small effector 1 [Source:HGNC Symbol;Acc:HGNC:17719]
ENSG00000170296	2209.15	1.1375	0.0744751	4.09494e-53	1.38176e-51	11337	GABARAP	GABA type A receptor-associated protein [Source:HGNC Symbol;Acc:HGNC:4067]
ENSG00000049246	92.4357	1.13709	0.271561	7.88324e-06	3.55605e-05	8863	PER3	period circadian regulator 3 [Source:HGNC Symbol;Acc:HGNC:8847]
ENSG00000162496	2358.33	1.13171	0.0786194	1.77157e-47	5.2415e-46	9249	DHRS3	dehydrogenase/reductase 3 [Source:HGNC Symbol;Acc:HGNC:17693]
ENSG00000161328	128.051	1.13153	0.212433	3.01702e-08	1.77447e-07	115399	LRRC56	leucine rich repeat containing 56 [Source:HGNC Symbol;Acc:HGNC:25430]
ENSG00000182263	99.007	1.13138	0.273495	1.02177e-05	4.54124e-05	55137	FIGN	fidgetin, microtubule severing factor [Source:HGNC Symbol;Acc:HGNC:13285]
ENSG00000022267	172.533	1.12881	0.186768	4.56728e-10	3.15181e-09	2273	FHL1	four and a half LIM domains 1 [Source:HGNC Symbol;Acc:HGNC:3702]
ENSG00000145730	1399.34	1.128	0.0941842	1.66405e-33	3.51669e-32	5066	PAM	peptidylglycine alpha-amidating monooxygenase [Source:HGNC Symbol;Acc:HGNC:8596]
ENSG00000151690	145.294	1.12795	0.244491	1.26595e-06	6.27023e-06	54842	MFSD6	major facilitator superfamily domain containing 6 [Source:HGNC Symbol;Acc:HGNC:24711]
ENSG00000142089	3413.6	1.12695	0.0680285	3.59236e-62	1.50555e-60	10410	IFITM3	interferon induced transmembrane protein 3 [Source:HGNC Symbol;Acc:HGNC:5414]
ENSG00000168890	162.921	1.12657	0.215455	5.70246e-08	3.26118e-07	129303	TMEM150A	transmembrane protein 150A [Source:HGNC Symbol;Acc:HGNC:24677]
ENSG00000197892	710.408	1.12648	0.0999671	6.28894e-30	1.17558e-28	23303	KIF13B	kinesin family member 13B [Source:HGNC Symbol;Acc:HGNC:14405]
ENSG00000163378	380.647	1.12622	0.133467	1.04593e-17	1.15893e-16	285203	EOGT	EGF domain specific O-linked N-acetylglucosamine transferase [Source:HGNC Symbol;Acc:HGNC:28526]
ENSG00000083750	114.455	1.12581	0.265457	6.18198e-06	2.83152e-05	10325	RRAGB	Ras related GTP binding B [Source:HGNC Symbol;Acc:HGNC:19901]
ENSG00000114745	654.193	1.12527	0.108092	6.81424e-26	1.08804e-24	64689	GORASP1	golgi reassembly stacking protein 1 [Source:HGNC Symbol;Acc:HGNC:16769]
ENSG00000127419	407.102	1.12283	0.196898	3.51319e-09	2.26421e-08	84286	TMEM175	transmembrane protein 175 [Source:HGNC Symbol;Acc:HGNC:28709]
ENSG00000166750	1377.95	1.11955	0.0804065	1.64474e-44	4.57536e-43	162394	SLFN5	schlafen family member 5 [Source:HGNC Symbol;Acc:HGNC:28286]
ENSG00000115289	321.591	1.11897	0.150719	3.39614e-14	3.15307e-13	84759	PCGF1	polycomb group ring finger 1 [Source:HGNC Symbol;Acc:HGNC:17615]
ENSG00000100284	352.715	1.11824	0.132001	7.78014e-18	8.67663e-17	10043	TOM1	target of myb1 membrane trafficking protein [Source:HGNC Symbol;Acc:HGNC:11982]
ENSG00000166165	3345	1.11786	0.0708138	1.30463e-56	4.73866e-55	1152	CKB	creatine kinase B [Source:HGNC Symbol;Acc:HGNC:1991]
ENSG00000104691	196.116	1.11573	0.186774	8.32214e-10	5.65561e-09	7993	UBXN8	UBX domain protein 8 [Source:HGNC Symbol;Acc:HGNC:30307]
ENSG00000181035	338.316	1.11538	0.14154	9.78287e-16	9.86145e-15	284439	SLC25A42	solute carrier family 25 member 42 [Source:HGNC Symbol;Acc:HGNC:28380]
ENSG00000268996	66.7802	1.11515	0.291234	3.87249e-05	0.000159336	100289341	MAN1B1-DT	MAN1B1 divergent transcript [Source:HGNC Symbol;Acc:HGNC:48715]
ENSG00000138380	73.5556	1.11478	0.351099	0.000466982	0.00163939	79800	CARF	calcium responsive transcription factor [Source:HGNC Symbol;Acc:HGNC:14435]
ENSG00000082996	453.415	1.11369	0.119762	4.65223e-21	6.10584e-20	11342	RNF13	ring finger protein 13 [Source:HGNC Symbol;Acc:HGNC:10057]
ENSG00000143322	1712.4	1.11248	0.121208	1.44584e-20	1.84239e-19	27	ABL2	ABL proto-oncogene 2, non-receptor tyrosine kinase [Source:HGNC Symbol;Acc:HGNC:77]
ENSG00000204386	428.928	1.1119	0.122391	3.66224e-20	4.59333e-19	4758	NEU1	neuraminidase 1 [Source:HGNC Symbol;Acc:HGNC:7758]
ENSG00000066739	520.478	1.10935	0.19738	5.90807e-09	3.70611e-08	55102	ATG2B	autophagy related 2B [Source:HGNC Symbol;Acc:HGNC:20187]
ENSG00000174938	1366.96	1.10932	0.0863082	2.81173e-38	6.77545e-37	26470	SEZ6L2	seizure related 6 homolog like 2 [Source:HGNC Symbol;Acc:HGNC:30844]
ENSG00000169220	99.2	1.10925	0.246706	2.04944e-06	9.91562e-06	10636	RGS14	regulator of G protein signaling 14 [Source:HGNC Symbol;Acc:HGNC:9996]
ENSG00000254221	142.183	1.1092	0.208142	3.40197e-08	1.98935e-07	56104	PCDHGB1	protocadherin gamma subfamily B, 1 [Source:HGNC Symbol;Acc:HGNC:8708]
ENSG00000100605	2024.53	1.10915	0.0788066	1.86356e-45	5.27606e-44	3705	ITPK1	inositol-tetrakisphosphate 1-kinase [Source:HGNC Symbol;Acc:HGNC:6177]
ENSG00000012171	5424.69	1.10901	0.06646	5.3345e-63	2.27408e-61	7869	SEMA3B	semaphorin 3B [Source:HGNC Symbol;Acc:HGNC:10724]
ENSG00000119899	155.065	1.10883	0.195713	4.79777e-09	3.04381e-08	26503	SLC17A5	solute carrier family 17 member 5 [Source:HGNC Symbol;Acc:HGNC:10933]
ENSG00000188042	617.705	1.10873	0.113978	8.26279e-23	1.17638e-21	10123	ARL4C	ADP ribosylation factor like GTPase 4C [Source:HGNC Symbol;Acc:HGNC:698]
ENSG00000232442	64.4099	1.10841	0.297267	6.12172e-05	0.000244453	100505771	MHENCR	melanoma highly expressed competing endogenous lncRNA for miR-425 and miR-489 [Source:HGNC Symbol;Acc:HGNC:53110]
ENSG00000157873	128.425	1.10836	0.218652	1.33761e-07	7.34503e-07	8764	TNFRSF14	TNF receptor superfamily member 14 [Source:HGNC Symbol;Acc:HGNC:11912]
ENSG00000049239	2102.19	1.10822	0.0715988	1.67528e-54	5.81093e-53	9563	H6PD	hexose-6-phosphate dehydrogenase/glucose 1-dehydrogenase [Source:HGNC Symbol;Acc:HGNC:4795]
ENSG00000107679	565.902	1.10782	0.13416	4.42316e-17	4.7411e-16	59338	PLEKHA1	pleckstrin homology domain containing A1 [Source:HGNC Symbol;Acc:HGNC:14335]
ENSG00000176490	194.471	1.10778	0.207606	3.1301e-08	1.8371e-07	148252	DIRAS1	DIRAS family GTPase 1 [Source:HGNC Symbol;Acc:HGNC:19127]
ENSG00000163069	807.012	1.10771	0.119447	6.75974e-21	8.78923e-20	6443	SGCB	sarcoglycan beta [Source:HGNC Symbol;Acc:HGNC:10806]
ENSG00000107201	39.2116	1.10636	0.399595	0.00162965	0.00521559	23586	DDX58	DExD/H-box helicase 58 [Source:HGNC Symbol;Acc:HGNC:19102]
ENSG00000115738	324.028	1.1062	0.23023	4.98552e-07	2.58872e-06	3398	ID2	inhibitor of DNA binding 2 [Source:HGNC Symbol;Acc:HGNC:5361]
ENSG00000179104	941.112	1.10433	0.100491	1.50131e-28	2.67862e-27	160335	TMTC2	transmembrane O-mannosyltransferase targeting cadherins 2 [Source:HGNC Symbol;Acc:HGNC:25440]
ENSG00000130203	100.377	1.1031	0.257446	6.15406e-06	2.81931e-05	348	APOE	apolipoprotein E [Source:HGNC Symbol;Acc:HGNC:613]
ENSG00000196998	1338.65	1.10289	0.0793167	2.06588e-44	5.71134e-43	11152	WDR45	WD repeat domain 45 [Source:HGNC Symbol;Acc:HGNC:28912]
ENSG00000117616	582.982	1.10211	0.139291	8.01914e-16	8.09451e-15	57035	RSRP1	arginine and serine rich protein 1 [Source:HGNC Symbol;Acc:HGNC:25234]
ENSG00000145685	1158.43	1.10178	0.119831	9.22512e-21	1.1891e-19	10184	LHFPL2	LHFPL tetraspan subfamily member 2 [Source:HGNC Symbol;Acc:HGNC:6588]
ENSG00000156475	55.9188	1.09986	0.355552	0.000533388	0.00185473	5521	PPP2R2B	protein phosphatase 2 regulatory subunit Bbeta [Source:HGNC Symbol;Acc:HGNC:9305]
ENSG00000154114	385.326	1.09976	0.132329	3.52896e-17	3.81189e-16	219899	TBCEL	tubulin folding cofactor E like [Source:HGNC Symbol;Acc:HGNC:28115]
ENSG00000166946	513.755	1.09962	0.118264	5.37465e-21	7.02099e-20	23582	CCNDBP1	cyclin D1 binding protein 1 [Source:HGNC Symbol;Acc:HGNC:1587]
ENSG00000113140	21764.3	1.09891	0.0560994	1.88665e-86	1.21803e-84	6678	SPARC	secreted protein acidic and cysteine rich [Source:HGNC Symbol;Acc:HGNC:11219]
ENSG00000172037	3622.57	1.09844	0.111203	1.73387e-23	2.54978e-22	3913	LAMB2	laminin subunit beta 2 [Source:HGNC Symbol;Acc:HGNC:6487]
ENSG00000245060	97.1786	1.0983	0.24018	1.62539e-06	7.95008e-06	729678	LINC00847	long intergenic non-protein coding RNA 847 [Source:HGNC Symbol;Acc:HGNC:45050]
ENSG00000259431	272.071	1.09802	0.150641	1.06786e-13	9.61075e-13	79178	THTPA	thiamine triphosphatase [Source:HGNC Symbol;Acc:HGNC:18987]
ENSG00000185100	66.341	1.09589	0.311612	0.000127766	0.00048879	122622	ADSS1	adenylosuccinate synthase 1 [Source:HGNC Symbol;Acc:HGNC:20093]
ENSG00000139636	249.191	1.0954	0.172432	7.17355e-11	5.29728e-10	55716	LMBR1L	limb development membrane protein 1 like [Source:HGNC Symbol;Acc:HGNC:18268]
ENSG00000134013	2667.65	1.09535	0.0824124	8.66353e-41	2.21425e-39	4017	LOXL2	lysyl oxidase like 2 [Source:HGNC Symbol;Acc:HGNC:6666]
ENSG00000132824	2963.99	1.09364	0.0683165	3.99732e-58	1.51857e-56	10955	SERINC3	serine incorporator 3 [Source:HGNC Symbol;Acc:HGNC:11699]
ENSG00000159314	232.639	1.09346	0.19399	5.97683e-09	3.74714e-08	201176	ARHGAP27	Rho GTPase activating protein 27 [Source:HGNC Symbol;Acc:HGNC:31813]
ENSG00000116171	853.526	1.09336	0.109207	5.01569e-24	7.52455e-23	6342	SCP2	sterol carrier protein 2 [Source:HGNC Symbol;Acc:HGNC:10606]
ENSG00000275832	1382.39	1.09308	0.0969045	5.80834e-30	1.08666e-28	57636	ARHGAP23	Rho GTPase activating protein 23 [Source:HGNC Symbol;Acc:HGNC:29293]
ENSG00000159761	125.068	1.09286	0.209339	5.80585e-08	3.31691e-07	388284	C16orf86	chromosome 16 open reading frame 86 [Source:HGNC Symbol;Acc:HGNC:33755]
ENSG00000171298	2716.19	1.09258	0.0769139	2.71825e-46	7.88576e-45	2548	GAA	alpha glucosidase [Source:HGNC Symbol;Acc:HGNC:4065]
ENSG00000245556	118.78	1.0913	0.229889	7.13692e-07	3.63817e-06	728769	SCAMP1-AS1	SCAMP1 antisense RNA 1 [Source:HGNC Symbol;Acc:HGNC:50544]
ENSG00000135956	780.204	1.09118	0.097418	1.42389e-29	2.62433e-28	55654	TMEM127	transmembrane protein 127 [Source:HGNC Symbol;Acc:HGNC:26038]
ENSG00000275183	237.638	1.09113	0.168941	3.71592e-11	2.81759e-10	94059	LENG9	leukocyte receptor cluster member 9 [Source:HGNC Symbol;Acc:HGNC:16306]
ENSG00000111271	602.338	1.0907	0.112788	1.2824e-22	1.80824e-21	80724	ACAD10	acyl-CoA dehydrogenase family member 10 [Source:HGNC Symbol;Acc:HGNC:21597]
ENSG00000132635	955.769	1.09065	0.118322	1.08568e-20	1.39458e-19	64773	PCED1A	PC-esterase domain containing 1A [Source:HGNC Symbol;Acc:HGNC:16212]
ENSG00000006459	153.451	1.09064	0.222498	3.12338e-07	1.65489e-06	80853	KDM7A	lysine demethylase 7A [Source:HGNC Symbol;Acc:HGNC:22224]
ENSG00000198496	60.3227	1.09062	0.301422	9.40965e-05	0.000366829	10230	NBR2	neighbor of BRCA1 lncRNA 2 [Source:HGNC Symbol;Acc:HGNC:20691]
ENSG00000189157	44.6834	1.09048	0.403204	0.00203082	0.00637052	100129583	FAM47E	family with sequence similarity 47 member E [Source:HGNC Symbol;Acc:HGNC:34343]
ENSG00000054392	126.641	1.09	0.225786	4.52456e-07	2.36034e-06	55733	HHAT	hedgehog acyltransferase [Source:HGNC Symbol;Acc:HGNC:18270]
ENSG00000176978	1740.01	1.08903	0.074443	6.63302e-49	2.0214e-47	29952	DPP7	dipeptidyl peptidase 7 [Source:HGNC Symbol;Acc:HGNC:14892]
ENSG00000226752	336.582	1.08816	0.157408	1.7482e-12	1.4615e-11	253039	CUTALP	cutA divalent cation tolerance like, pseudogene [Source:HGNC Symbol;Acc:HGNC:27367]
ENSG00000154027	53.9903	1.08803	0.347913	0.000498433	0.00174377	26289	AK5	adenylate kinase 5 [Source:HGNC Symbol;Acc:HGNC:365]
ENSG00000011566	336.121	1.08699	0.145225	2.55615e-14	2.38909e-13	8491	MAP4K3	mitogen-activated protein kinase kinase kinase kinase 3 [Source:HGNC Symbol;Acc:HGNC:6865]
ENSG00000169306	277.642	1.08667	0.156511	1.26558e-12	1.06601e-11	11141	IL1RAPL1	interleukin 1 receptor accessory protein like 1 [Source:HGNC Symbol;Acc:HGNC:5996]
ENSG00000181513	163.853	1.08647	0.189033	3.22705e-09	2.08884e-08	79777	ACBD4	acyl-CoA binding domain containing 4 [Source:HGNC Symbol;Acc:HGNC:23337]
ENSG00000243646	300.917	1.08631	0.140978	4.5636e-15	4.45939e-14	3588	IL10RB	interleukin 10 receptor subunit beta [Source:HGNC Symbol;Acc:HGNC:5965]
ENSG00000153790	70.9191	1.08614	0.317243	0.000211376	0.000782259	136895	C7orf31	chromosome 7 open reading frame 31 [Source:HGNC Symbol;Acc:HGNC:21722]
ENSG00000186340	80.2344	1.08548	0.274809	2.62298e-05	0.00011051	7058	THBS2	thrombospondin 2 [Source:HGNC Symbol;Acc:HGNC:11786]
ENSG00000162032	596.537	1.08537	0.113264	3.20097e-22	4.44396e-21	90864	SPSB3	splA/ryanodine receptor domain and SOCS box containing 3 [Source:HGNC Symbol;Acc:HGNC:30629]
ENSG00000167701	49.5913	1.08509	0.345125	0.000499168	0.00174607	2875	GPT	glutamic--pyruvic transaminase [Source:HGNC Symbol;Acc:HGNC:4552]
ENSG00000170266	910.797	1.08488	0.108422	4.93417e-24	7.40722e-23	2720	GLB1	galactosidase beta 1 [Source:HGNC Symbol;Acc:HGNC:4298]
ENSG00000137845	2387.6	1.08417	0.0838043	1.08132e-38	2.62263e-37	102	ADAM10	ADAM metallopeptidase domain 10 [Source:HGNC Symbol;Acc:HGNC:188]
ENSG00000164008	73.131	1.08337	0.399133	0.00181972	0.00576988	79078	C1orf50	chromosome 1 open reading frame 50 [Source:HGNC Symbol;Acc:HGNC:28795]
ENSG00000213742	79.6567	1.0833	0.297775	8.0415e-05	0.000316977	102724826	ZNF337-AS1	ZNF337 antisense RNA 1 [Source:HGNC Symbol;Acc:HGNC:40759]
ENSG00000026508	10088.4	1.08272	0.0666508	8.74842e-60	3.48968e-58	960	CD44	CD44 molecule (Indian blood group) [Source:HGNC Symbol;Acc:HGNC:1681]
ENSG00000175348	342.965	1.08025	0.132403	1.15658e-16	1.21352e-15	56674	TMEM9B	TMEM9 domain family member B [Source:HGNC Symbol;Acc:HGNC:1168]
ENSG00000186715	64.17	1.0799	0.309278	0.000153498	0.000581454	11223	MST1L	macrophage stimulating 1 like [Source:HGNC Symbol;Acc:HGNC:7390]
ENSG00000139192	85.9176	1.07769	0.284827	4.73842e-05	0.000191786	55080	TAPBPL	TAP binding protein like [Source:HGNC Symbol;Acc:HGNC:30683]
ENSG00000116786	1830.52	1.07767	0.0704258	2.51416e-53	8.5093e-52	23207	PLEKHM2	pleckstrin homology and RUN domain containing M2 [Source:HGNC Symbol;Acc:HGNC:29131]
ENSG00000197647	36.3405	1.07688	0.422207	0.00325442	0.00977638	163059	ZNF433	zinc finger protein 433 [Source:HGNC Symbol;Acc:HGNC:20811]
ENSG00000176124	372.035	1.07463	0.189851	5.23781e-09	3.30982e-08	10301	DLEU1	deleted in lymphocytic leukemia 1 [Source:HGNC Symbol;Acc:HGNC:13747]
ENSG00000160716	33.8005	1.07457	0.41957	0.00303489	0.0091687	1141	CHRNB2	cholinergic receptor nicotinic beta 2 subunit [Source:HGNC Symbol;Acc:HGNC:1962]
ENSG00000186448	229.276	1.07306	0.169463	8.60172e-11	6.31849e-10	10168	ZNF197	zinc finger protein 197 [Source:HGNC Symbol;Acc:HGNC:12988]
ENSG00000103066	300.389	1.07136	0.146465	9.02532e-14	8.16887e-13	23659	PLA2G15	phospholipase A2 group XV [Source:HGNC Symbol;Acc:HGNC:17163]
ENSG00000184602	207.172	1.07105	0.186222	3.33409e-09	2.15376e-08	8303	SNN	stannin [Source:HGNC Symbol;Acc:HGNC:11149]
ENSG00000234745	3169.58	1.07065	0.0786088	1.14524e-42	3.07849e-41	3106	HLA-B	major histocompatibility complex, class I, B [Source:HGNC Symbol;Acc:HGNC:4932]
ENSG00000160190	61.3931	1.06959	0.307067	0.000156057	0.000590449	54020	SLC37A1	solute carrier family 37 member 1 [Source:HGNC Symbol;Acc:HGNC:11024]
ENSG00000185896	4683.47	1.06912	0.0594655	1.30704e-72	6.60558e-71	3916	LAMP1	lysosomal associated membrane protein 1 [Source:HGNC Symbol;Acc:HGNC:6499]
ENSG00000175197	138.322	1.06793	0.203662	5.54651e-08	3.17443e-07	1649	DDIT3	DNA damage inducible transcript 3 [Source:HGNC Symbol;Acc:HGNC:2726]
ENSG00000184481	340.623	1.06643	0.177776	7.03214e-10	4.79939e-09	4303	FOXO4	forkhead box O4 [Source:HGNC Symbol;Acc:HGNC:7139]
ENSG00000145743	519.727	1.06529	0.115957	1.52208e-20	1.93734e-19	64839	FBXL17	F-box and leucine rich repeat protein 17 [Source:HGNC Symbol;Acc:HGNC:13615]
ENSG00000260804	140.224	1.06463	0.206983	9.31997e-08	5.20344e-07	150967	LINC01963	long intergenic non-protein coding RNA 1963 [Source:HGNC Symbol;Acc:HGNC:25283]
ENSG00000135378	59.4989	1.06446	0.302897	0.000146509	0.000556962	79056	PRRG4	proline rich and Gla domain 4 [Source:HGNC Symbol;Acc:HGNC:30799]
ENSG00000160539	139.389	1.06437	0.212068	1.86261e-07	1.00914e-06	84814	PLPP7	phospholipid phosphatase 7 (inactive) [Source:HGNC Symbol;Acc:HGNC:28174]
ENSG00000072609	573.137	1.06383	0.10748	1.66185e-23	2.44871e-22	55743	CHFR	checkpoint with forkhead and ring finger domains [Source:HGNC Symbol;Acc:HGNC:20455]
ENSG00000122970	374.331	1.06319	0.151258	8.0991e-13	6.8921e-12	28981	IFT81	intraflagellar transport 81 [Source:HGNC Symbol;Acc:HGNC:14313]
ENSG00000198793	1855.85	1.06212	0.0732704	5.02393e-48	1.49633e-46	2475	MTOR	mechanistic target of rapamycin kinase [Source:HGNC Symbol;Acc:HGNC:3942]
ENSG00000111725	367.775	1.06165	0.182695	1.99432e-09	1.31413e-08	5564	PRKAB1	protein kinase AMP-activated non-catalytic subunit beta 1 [Source:HGNC Symbol;Acc:HGNC:9378]
ENSG00000114993	852.003	1.06159	0.0986786	1.98745e-27	3.37352e-26	6242	RTKN	rhotekin [Source:HGNC Symbol;Acc:HGNC:10466]
ENSG00000113732	628.491	1.06047	0.11948	2.70111e-19	3.22833e-18	8992	ATP6V0E1	ATPase H+ transporting V0 subunit e1 [Source:HGNC Symbol;Acc:HGNC:863]
ENSG00000215252	217.445	1.06028	0.187224	5.21852e-09	3.2995e-08	440270	GOLGA8B	golgin A8 family member B [Source:HGNC Symbol;Acc:HGNC:31973]
ENSG00000165943	423.846	1.05862	0.141523	2.55019e-14	2.38452e-13	64112	MOAP1	modulator of apoptosis 1 [Source:HGNC Symbol;Acc:HGNC:16658]
ENSG00000165861	325.46	1.05809	0.155349	3.46635e-12	2.8436e-11	53349	ZFYVE1	zinc finger FYVE-type containing 1 [Source:HGNC Symbol;Acc:HGNC:13180]
ENSG00000095587	35.918	1.05777	0.50551	0.0100921	0.0271712	7093	TLL2	tolloid like 2 [Source:HGNC Symbol;Acc:HGNC:11844]
ENSG00000118113	66.5352	1.05728	0.328296	0.000395859	0.0014036	4317	MMP8	matrix metallopeptidase 8 [Source:HGNC Symbol;Acc:HGNC:7175]
ENSG00000164366	183.739	1.05679	0.224084	7.89169e-07	3.99285e-06	133957	CCDC127	coiled-coil domain containing 127 [Source:HGNC Symbol;Acc:HGNC:30520]
ENSG00000128595	4520.16	1.05582	0.08481	5.45412e-36	1.23314e-34	813	CALU	calumenin [Source:HGNC Symbol;Acc:HGNC:1458]
ENSG00000284981	117.321	1.05427	0.269129	3.08857e-05	0.000128886	107983993	UPK3BL2	uroplakin 3B like 2 [Source:HGNC Symbol;Acc:HGNC:53444]
ENSG00000182362	96.2385	1.05288	0.251581	1.01486e-05	4.51322e-05	54059	YBEY	ybeY metalloendoribonuclease [Source:HGNC Symbol;Acc:HGNC:1299]
ENSG00000159445	1112.55	1.05267	0.0859277	6.79478e-35	1.48806e-33	117145	THEM4	thioesterase superfamily member 4 [Source:HGNC Symbol;Acc:HGNC:17947]
ENSG00000157388	157.221	1.05207	0.256838	1.35344e-05	5.92343e-05	776	CACNA1D	calcium voltage-gated channel subunit alpha1 D [Source:HGNC Symbol;Acc:HGNC:1391]
ENSG00000106993	341.34	1.05203	0.153168	2.11296e-12	1.75658e-11	55664	CDC37L1	cell division cycle 37 like 1 [Source:HGNC Symbol;Acc:HGNC:17179]
ENSG00000237149	68.1588	1.0518	0.285492	7.91913e-05	0.000312429	100131213	ZNF503-AS2	ZNF503 antisense RNA 2 [Source:HGNC Symbol;Acc:HGNC:23525]
ENSG00000171310	966.206	1.05073	0.112453	2.91822e-21	3.86867e-20	50515	CHST11	carbohydrate sulfotransferase 11 [Source:HGNC Symbol;Acc:HGNC:17422]
ENSG00000116406	1220.16	1.05029	0.0911829	4.25637e-31	8.28212e-30	80267	EDEM3	ER degradation enhancing alpha-mannosidase like protein 3 [Source:HGNC Symbol;Acc:HGNC:16787]
ENSG00000103024	778.325	1.04865	0.100291	4.97793e-26	8.01709e-25	4832	NME3	NME/NM23 nucleoside diphosphate kinase 3 [Source:HGNC Symbol;Acc:HGNC:7851]
ENSG00000036672	43.0464	1.04846	0.364141	0.00130932	0.00426909	9099	USP2	ubiquitin specific peptidase 2 [Source:HGNC Symbol;Acc:HGNC:12618]
ENSG00000163322	140.817	1.04827	0.23309	2.52755e-06	1.20616e-05	84142	ABRAXAS1	abraxas 1, BRCA1 A complex subunit [Source:HGNC Symbol;Acc:HGNC:25829]
ENSG00000047365	124.702	1.04766	0.269234	3.23447e-05	0.000134537	116984	ARAP2	ArfGAP with RhoGAP domain, ankyrin repeat and PH domain 2 [Source:HGNC Symbol;Acc:HGNC:16924]
ENSG00000249437	192.903	1.04653	0.186948	7.04765e-09	4.38647e-08	4671	NAIP	NLR family apoptosis inhibitory protein [Source:HGNC Symbol;Acc:HGNC:7634]
ENSG00000164292	1506.28	1.04605	0.0853819	6.07667e-35	1.33603e-33	22836	RHOBTB3	Rho related BTB domain containing 3 [Source:HGNC Symbol;Acc:HGNC:18757]
ENSG00000156011	289.328	1.04521	0.158965	1.71676e-11	1.33434e-10	23362	PSD3	pleckstrin and Sec7 domain containing 3 [Source:HGNC Symbol;Acc:HGNC:19093]
ENSG00000101347	494.56	1.04423	0.116745	1.46146e-19	1.76944e-18	25939	SAMHD1	SAM and HD domain containing deoxynucleoside triphosphate triphosphohydrolase 1 [Source:HGNC Symbol;Acc:HGNC:15925]
ENSG00000134590	1345.9	1.04363	0.0773096	6.04283e-42	1.5918e-40	8933	RTL8C	retrotransposon Gag like 8C [Source:HGNC Symbol;Acc:HGNC:2569]
ENSG00000223705	776.066	1.04259	0.127522	1.08708e-16	1.14166e-15	155400	NSUN5P1	NSUN5 pseudogene 1 [Source:HGNC Symbol;Acc:HGNC:19146]
ENSG00000165269	60.3648	1.04254	0.349447	0.000939278	0.00314096	364	AQP7	aquaporin 7 [Source:HGNC Symbol;Acc:HGNC:640]
ENSG00000184227	57.3364	1.04192	0.357236	0.00115097	0.00379377	641371	ACOT1	acyl-CoA thioesterase 1 [Source:HGNC Symbol;Acc:HGNC:33128]
ENSG00000080200	296.242	1.04128	0.163032	6.19391e-11	4.61969e-10	131544	CRYBG3	crystallin beta-gamma domain containing 3 [Source:HGNC Symbol;Acc:HGNC:34427]
ENSG00000171435	54.9016	1.04068	0.320095	0.000391006	0.00138804	283455	KSR2	kinase suppressor of ras 2 [Source:HGNC Symbol;Acc:HGNC:18610]
ENSG00000224914	227.747	1.0402	0.179569	2.44865e-09	1.6031e-08	439994	LINC00863	long intergenic non-protein coding RNA 863 [Source:HGNC Symbol;Acc:HGNC:45162]
ENSG00000213859	166.24	1.03777	0.195445	3.90568e-08	2.26728e-07	147040	KCTD11	potassium channel tetramerization domain containing 11 [Source:HGNC Symbol;Acc:HGNC:21302]
ENSG00000144843	104.89	1.03749	0.263372	2.71455e-05	0.000114238	141	ADPRH	ADP-ribosylarginine hydrolase [Source:HGNC Symbol;Acc:HGNC:269]
ENSG00000164107	75.7121	1.03585	0.272602	5.02152e-05	0.000202401	9464	HAND2	heart and neural crest derivatives expressed 2 [Source:HGNC Symbol;Acc:HGNC:4808]
ENSG00000182541	244.88	1.03555	0.168988	3.30997e-10	2.30912e-09	3985	LIMK2	LIM domain kinase 2 [Source:HGNC Symbol;Acc:HGNC:6614]
ENSG00000123684	1403.88	1.03376	0.0814879	2.42667e-37	5.66426e-36	9926	LPGAT1	lysophosphatidylglycerol acyltransferase 1 [Source:HGNC Symbol;Acc:HGNC:28985]
ENSG00000137710	1651.57	1.0336	0.108899	9.13442e-22	1.2419e-20	5962	RDX	radixin [Source:HGNC Symbol;Acc:HGNC:9944]
ENSG00000145348	119.541	1.03346	0.267814	4.06039e-05	0.000166302	93627	TBCK	TBC1 domain containing kinase [Source:HGNC Symbol;Acc:HGNC:28261]
ENSG00000172725	2668.97	1.03303	0.0846451	1.08489e-34	2.35971e-33	57175	CORO1B	coronin 1B [Source:HGNC Symbol;Acc:HGNC:2253]
ENSG00000196693	182.491	1.03298	0.222758	1.24974e-06	6.19406e-06	7582	ZNF33B	zinc finger protein 33B [Source:HGNC Symbol;Acc:HGNC:13097]
ENSG00000185475	913.979	1.03286	0.0933803	6.77921e-29	1.22026e-27	374395	TMEM179B	transmembrane protein 179B [Source:HGNC Symbol;Acc:HGNC:33744]
ENSG00000187017	306.192	1.03278	0.140781	7.91635e-14	7.20014e-13	83715	ESPN	espin [Source:HGNC Symbol;Acc:HGNC:13281]
ENSG00000253731	61.8692	1.03254	0.295896	0.000167737	0.000630794	56109	PCDHGA6	protocadherin gamma subfamily A, 6 [Source:HGNC Symbol;Acc:HGNC:8704]
ENSG00000175866	534.518	1.03206	0.110466	3.618e-21	4.77088e-20	10458	BAIAP2	BAR/IMD domain containing adaptor protein 2 [Source:HGNC Symbol;Acc:HGNC:947]
ENSG00000177106	240.099	1.03104	0.160636	5.16853e-11	3.88606e-10	64787	EPS8L2	EPS8 like 2 [Source:HGNC Symbol;Acc:HGNC:21296]
ENSG00000214562	57.6985	1.03068	0.333149	0.000681556	0.0023297	728130	NUTM2D	NUT family member 2D [Source:HGNC Symbol;Acc:HGNC:23447]
ENSG00000244694	108.112	1.02938	0.252187	1.46835e-05	6.40479e-05	442213	PTCHD4	patched domain containing 4 [Source:HGNC Symbol;Acc:HGNC:21345]
ENSG00000268916	399.499	1.02894	0.123319	2.75548e-17	2.98941e-16	389903	CSAG3	CSAG family member 3 [Source:HGNC Symbol;Acc:HGNC:26237]
ENSG00000120451	1345.88	1.02869	0.111439	1.00128e-20	1.2884e-19	399979	SNX19	sorting nexin 19 [Source:HGNC Symbol;Acc:HGNC:21532]
ENSG00000067082	1654.31	1.02802	0.495152	0.0111102	0.0296016	1316	KLF6	Kruppel like factor 6 [Source:HGNC Symbol;Acc:HGNC:2235]
ENSG00000197928	58.697	1.02762	0.347499	0.000991771	0.00330216	342926	ZNF677	zinc finger protein 677 [Source:HGNC Symbol;Acc:HGNC:28730]
ENSG00000221817	50.4115	1.0266	0.339596	0.000877773	0.00294941	101929145	PPP3CB-AS1	PPP3CB antisense RNA 1 (head to head) [Source:HGNC Symbol;Acc:HGNC:50750]
ENSG00000250120	185.66	1.02575	0.207357	2.50007e-07	1.33989e-06	56139	PCDHA10	protocadherin alpha 10 [Source:HGNC Symbol;Acc:HGNC:8664]
ENSG00000115556	58.5649	1.02569	0.308996	0.000310978	0.00112148	84812	PLCD4	phospholipase C delta 4 [Source:HGNC Symbol;Acc:HGNC:9062]
ENSG00000103150	267.318	1.02559	0.221783	1.36808e-06	6.7417e-06	23417	MLYCD	malonyl-CoA decarboxylase [Source:HGNC Symbol;Acc:HGNC:7150]
ENSG00000102580	1303.25	1.02422	0.0781992	1.33398e-39	3.30726e-38	5611	DNAJC3	DnaJ heat shock protein family (Hsp40) member C3 [Source:HGNC Symbol;Acc:HGNC:9439]
ENSG00000167657	1013.08	1.0236	0.0928277	1.1244e-28	2.01257e-27	1613	DAPK3	death associated protein kinase 3 [Source:HGNC Symbol;Acc:HGNC:2676]
ENSG00000167930	2625.57	1.02107	0.0767686	9.21622e-41	2.35014e-39	83986	FAM234A	family with sequence similarity 234 member A [Source:HGNC Symbol;Acc:HGNC:14163]
ENSG00000133943	216.746	1.01757	0.173902	1.77541e-09	1.17543e-08	80017	DGLUCY	D-glutamate cyclase [Source:HGNC Symbol;Acc:HGNC:20498]
ENSG00000129636	662.664	1.01754	0.10152	4.54843e-24	6.83733e-23	81533	ITFG1	integrin alpha FG-GAP repeat containing 1 [Source:HGNC Symbol;Acc:HGNC:30697]
ENSG00000121964	184.595	1.01713	0.228186	3.00558e-06	1.42273e-05	79712	GTDC1	glycosyltransferase like domain containing 1 [Source:HGNC Symbol;Acc:HGNC:20887]
ENSG00000148735	47.7483	1.01698	0.455944	0.00720376	0.020057	79949	PLEKHS1	pleckstrin homology domain containing S1 [Source:HGNC Symbol;Acc:HGNC:26285]
ENSG00000185201	572.958	1.0163	0.131597	3.84826e-15	3.77857e-14	10581	IFITM2	interferon induced transmembrane protein 2 [Source:HGNC Symbol;Acc:HGNC:5413]
ENSG00000001561	75.705	1.01587	0.271389	6.65027e-05	0.000264331	22875	ENPP4	ectonucleotide pyrophosphatase/phosphodiesterase 4 [Source:HGNC Symbol;Acc:HGNC:3359]
ENSG00000136826	1048.44	1.01562	0.488961	0.0114637	0.0304527	9314	KLF4	Kruppel like factor 4 [Source:HGNC Symbol;Acc:HGNC:6348]
ENSG00000096080	594.889	1.0149	0.119644	9.05891e-18	1.00625e-16	55168	MRPS18A	mitochondrial ribosomal protein S18A [Source:HGNC Symbol;Acc:HGNC:14515]
ENSG00000006715	651.805	1.01424	0.168467	6.48452e-10	4.4314e-09	27072	VPS41	VPS41 subunit of HOPS complex [Source:HGNC Symbol;Acc:HGNC:12713]
ENSG00000167740	367.928	1.01338	0.139949	1.65532e-13	1.47258e-12	124936	CYB5D2	cytochrome b5 domain containing 2 [Source:HGNC Symbol;Acc:HGNC:28471]
ENSG00000143622	444.463	1.01333	0.184375	1.51277e-08	9.16775e-08	6016	RIT1	Ras like without CAAX 1 [Source:HGNC Symbol;Acc:HGNC:10023]
ENSG00000127720	33.887	1.01305	0.4053	0.0039789	0.0117288	84190	METTL25	methyltransferase like 25 [Source:HGNC Symbol;Acc:HGNC:26228]
ENSG00000173482	269.316	1.01254	0.172229	1.57424e-09	1.04659e-08	5797	PTPRM	protein tyrosine phosphatase receptor type M [Source:HGNC Symbol;Acc:HGNC:9675]
ENSG00000112379	57.3998	1.0122	0.301345	0.000279869	0.00101687	57221	ARFGEF3	ARFGEF family member 3 [Source:HGNC Symbol;Acc:HGNC:21213]
ENSG00000162946	122.412	1.01197	0.22317	2.29539e-06	1.1022e-05	27185	DISC1	DISC1 scaffold protein [Source:HGNC Symbol;Acc:HGNC:2888]
ENSG00000011028	3127.05	1.01064	0.0615967	6.52561e-61	2.66488e-59	9902	MRC2	mannose receptor C type 2 [Source:HGNC Symbol;Acc:HGNC:16875]
ENSG00000042317	34.867	1.01027	0.409509	0.00445252	0.0129878	55812	SPATA7	spermatogenesis associated 7 [Source:HGNC Symbol;Acc:HGNC:20423]
ENSG00000140391	2309.8	1.00954	0.0805212	1.66889e-36	3.82748e-35	10099	TSPAN3	tetraspanin 3 [Source:HGNC Symbol;Acc:HGNC:17752]
ENSG00000198208	103.338	1.00824	0.244274	1.3283e-05	5.82365e-05	83694	RPS6KL1	ribosomal protein S6 kinase like 1 [Source:HGNC Symbol;Acc:HGNC:20222]
ENSG00000275342	190.509	1.00812	0.178066	5.81448e-09	3.65047e-08	157285	PRAG1	PEAK1 related, kinase-activating pseudokinase 1 [Source:HGNC Symbol;Acc:HGNC:25438]
ENSG00000164294	458.622	1.00714	0.151884	1.2797e-11	1.00478e-10	493869	GPX8	glutathione peroxidase 8 (putative) [Source:HGNC Symbol;Acc:HGNC:33100]
ENSG00000149577	909.611	1.00632	0.097586	2.15256e-25	3.38857e-24	51092	SIDT2	SID1 transmembrane family member 2 [Source:HGNC Symbol;Acc:HGNC:24272]
ENSG00000143469	136.11	1.00574	0.23981	1.05544e-05	4.6825e-05	255928	SYT14	synaptotagmin 14 [Source:HGNC Symbol;Acc:HGNC:23143]
ENSG00000164463	270.868	1.00435	0.223452	2.46472e-06	1.17794e-05	153222	CREBRF	CREB3 regulatory factor [Source:HGNC Symbol;Acc:HGNC:24050]
ENSG00000002746	60.3409	1.00358	0.351059	0.00132849	0.0043246	23072	HECW1	HECT, C2 and WW domain containing E3 ubiquitin protein ligase 1 [Source:HGNC Symbol;Acc:HGNC:22195]
ENSG00000225828	168.707	1.00308	0.211249	7.90316e-07	3.99685e-06	100128071	FAM229A	family with sequence similarity 229 member A [Source:HGNC Symbol;Acc:HGNC:44652]
ENSG00000139173	88.8548	1.00288	0.260589	4.24139e-05	0.000173175	84216	TMEM117	transmembrane protein 117 [Source:HGNC Symbol;Acc:HGNC:25308]
ENSG00000178401	476.084	1.00249	0.129444	3.37724e-15	3.32192e-14	79962	DNAJC22	DnaJ heat shock protein family (Hsp40) member C22 [Source:HGNC Symbol;Acc:HGNC:25802]
ENSG00000129675	387.636	1.00228	0.125285	4.8881e-16	4.9745e-15	9459	ARHGEF6	Rac/Cdc42 guanine nucleotide exchange factor 6 [Source:HGNC Symbol;Acc:HGNC:685]
ENSG00000182796	479.753	1.00134	0.138087	1.48787e-13	1.32731e-12	440104	TMEM198B	transmembrane protein 198B (pseudogene) [Source:HGNC Symbol;Acc:HGNC:43629]
ENSG00000160678	1243.62	1.0013	0.0841054	4.48306e-33	9.32427e-32	6271	S100A1	S100 calcium binding protein A1 [Source:HGNC Symbol;Acc:HGNC:10486]
ENSG00000158122	177.785	1.00121	0.194649	9.77431e-08	5.43943e-07	195827	PRXL2C	peroxiredoxin like 2C [Source:HGNC Symbol;Acc:HGNC:16881]
ENSG00000116138	400.806	1.00107	0.156876	6.76395e-11	5.01971e-10	23341	DNAJC16	DnaJ heat shock protein family (Hsp40) member C16 [Source:HGNC Symbol;Acc:HGNC:29157]
ENSG00000039319	605.033	1.00101	0.158447	1.01789e-10	7.42814e-10	9765	ZFYVE16	zinc finger FYVE-type containing 16 [Source:HGNC Symbol;Acc:HGNC:20756]
ENSG00000277147	104.487	0.999973	0.272119	8.90256e-05	0.000348235	57234	LINC00869	long intergenic non-protein coding RNA 869 [Source:HGNC Symbol;Acc:HGNC:29050]
ENSG00000120328	57.5976	0.999472	0.305707	0.000397075	0.00140724	56124	PCDHB12	protocadherin beta 12 [Source:HGNC Symbol;Acc:HGNC:8683]
ENSG00000180891	1418.61	0.999374	0.0972551	3.9305e-25	6.11843e-24	404093	CUEDC1	CUE domain containing 1 [Source:HGNC Symbol;Acc:HGNC:31350]
ENSG00000178878	44.3072	0.99889	0.488429	0.0129266	0.0339032	81575	APOLD1	apolipoprotein L domain containing 1 [Source:HGNC Symbol;Acc:HGNC:25268]
ENSG00000109265	306.159	0.997758	0.153861	3.53107e-11	2.68107e-10	57482	CRACD	capping protein inhibiting regulator of actin dynamics [Source:HGNC Symbol;Acc:HGNC:29219]
ENSG00000166275	222.066	0.997044	0.182388	1.86219e-08	1.11611e-07	119032	BORCS7	BLOC-1 related complex subunit 7 [Source:HGNC Symbol;Acc:HGNC:23516]
ENSG00000226091	54.3104	0.99616	0.34225	0.00125754	0.00411809	389634	LINC00937	long intergenic non-protein coding RNA 937 [Source:HGNC Symbol;Acc:HGNC:48629]
ENSG00000204348	217.206	0.995898	0.169562	1.63033e-09	1.08259e-08	1797	DXO	decapping exoribonuclease [Source:HGNC Symbol;Acc:HGNC:2992]
ENSG00000163629	589.222	0.995434	0.139854	4.22766e-13	3.67747e-12	5783	PTPN13	protein tyrosine phosphatase non-receptor type 13 [Source:HGNC Symbol;Acc:HGNC:9646]
ENSG00000160323	133.646	0.994794	0.214484	1.32112e-06	6.52467e-06	11093	ADAMTS13	ADAM metallopeptidase with thrombospondin type 1 motif 13 [Source:HGNC Symbol;Acc:HGNC:1366]
ENSG00000205707	114.627	0.993821	0.227412	5.01375e-06	2.31782e-05	144363	ETFRF1	electron transfer flavoprotein regulatory factor 1 [Source:HGNC Symbol;Acc:HGNC:27052]
ENSG00000127415	585.692	0.992981	0.158907	1.563e-10	1.12627e-09	3425	IDUA	alpha-L-iduronidase [Source:HGNC Symbol;Acc:HGNC:5391]
ENSG00000010810	803.407	0.991167	0.125672	1.19437e-15	1.20017e-14	2534	FYN	FYN proto-oncogene, Src family tyrosine kinase [Source:HGNC Symbol;Acc:HGNC:4037]
ENSG00000130956	322.163	0.990813	0.138647	3.57394e-13	3.1161e-12	22927	HABP4	hyaluronan binding protein 4 [Source:HGNC Symbol;Acc:HGNC:17062]
ENSG00000181751	454.359	0.990586	0.119818	5.6765e-17	6.06996e-16	90355	MACIR	macrophage immunometabolism regulator [Source:HGNC Symbol;Acc:HGNC:25052]
ENSG00000158296	102.226	0.990379	0.247358	2.32295e-05	9.8669e-05	64849	SLC13A3	solute carrier family 13 member 3 [Source:HGNC Symbol;Acc:HGNC:14430]
ENSG00000159792	704.092	0.990359	0.102629	1.99718e-22	2.79181e-21	5681	PSKH1	protein serine kinase H1 [Source:HGNC Symbol;Acc:HGNC:9529]
ENSG00000145246	216.897	0.99031	0.209152	8.12899e-07	4.10548e-06	57205	ATP10D	ATPase phospholipid transporting 10D (putative) [Source:HGNC Symbol;Acc:HGNC:13549]
ENSG00000125864	184.653	0.989894	0.173203	4.47859e-09	2.85292e-08	631	BFSP1	beaded filament structural protein 1 [Source:HGNC Symbol;Acc:HGNC:1040]
ENSG00000197479	72.8528	0.989352	0.287486	0.000220541	0.00081402	56125	PCDHB11	protocadherin beta 11 [Source:HGNC Symbol;Acc:HGNC:8682]
ENSG00000104154	129.498	0.987891	0.204511	5.20045e-07	2.69031e-06	7782	SLC30A4	solute carrier family 30 member 4 [Source:HGNC Symbol;Acc:HGNC:11015]
ENSG00000180257	42.8509	0.9877	0.462095	0.0102933	0.0276527	125893	ZNF816	zinc finger protein 816 [Source:HGNC Symbol;Acc:HGNC:26995]
ENSG00000143429	66.4397	0.986222	0.301884	0.000387996	0.00137835	645166	LSP1P4	LSP1 pseudogene 4 [Source:HGNC Symbol;Acc:HGNC:53915]
ENSG00000169231	793.377	0.985811	0.114468	3.26644e-18	3.72084e-17	7059	THBS3	thrombospondin 3 [Source:HGNC Symbol;Acc:HGNC:11787]
ENSG00000138448	1251.87	0.985573	0.0824089	2.42501e-33	5.09594e-32	3685	ITGAV	integrin subunit alpha V [Source:HGNC Symbol;Acc:HGNC:6150]
ENSG00000169760	152.679	0.985319	0.207869	7.87966e-07	3.98767e-06	22871	NLGN1	neuroligin 1 [Source:HGNC Symbol;Acc:HGNC:14291]
ENSG00000188549	1598.69	0.984883	0.115589	6.29089e-18	7.05451e-17	388115	CCDC9B	coiled-coil domain containing 9B [Source:HGNC Symbol;Acc:HGNC:33488]
ENSG00000117266	691.453	0.984841	0.104313	1.58537e-21	2.12696e-20	5129	CDK18	cyclin dependent kinase 18 [Source:HGNC Symbol;Acc:HGNC:8751]
ENSG00000247708	60.6348	0.983096	0.318232	0.000733826	0.00249449	100507266	STX18-AS1	STX18 antisense RNA 1 (head to head) [Source:HGNC Symbol;Acc:HGNC:48877]
ENSG00000118855	590.382	0.98221	0.106769	1.41616e-20	1.80663e-19	64747	MFSD1	major facilitator superfamily domain containing 1 [Source:HGNC Symbol;Acc:HGNC:25874]
ENSG00000167766	198.633	0.981433	0.175758	8.73119e-09	5.38926e-08	55769	ZNF83	zinc finger protein 83 [Source:HGNC Symbol;Acc:HGNC:13158]
ENSG00000242802	662.804	0.98042	0.116913	2.02576e-17	2.2117e-16	9907	AP5Z1	adaptor related protein complex 5 subunit zeta 1 [Source:HGNC Symbol;Acc:HGNC:22197]
ENSG00000174151	223.915	0.979464	0.185415	4.67159e-08	2.69231e-07	284613	CYB561D1	cytochrome b561 family member D1 [Source:HGNC Symbol;Acc:HGNC:26804]
ENSG00000121851	249.031	0.979356	0.166861	1.65306e-09	1.0967e-08	84265	POLR3GL	RNA polymerase III subunit GL [Source:HGNC Symbol;Acc:HGNC:28466]
ENSG00000072682	561.51	0.978975	0.117856	4.34247e-17	4.65685e-16	8974	P4HA2	prolyl 4-hydroxylase subunit alpha 2 [Source:HGNC Symbol;Acc:HGNC:8547]
ENSG00000181754	182.587	0.978875	0.185089	4.90809e-08	2.82351e-07	57463	AMIGO1	adhesion molecule with Ig like domain 1 [Source:HGNC Symbol;Acc:HGNC:20824]
ENSG00000121005	359.557	0.978869	0.154316	9.80004e-11	7.16574e-10	83690	CRISPLD1	cysteine rich secretory protein LCCL domain containing 1 [Source:HGNC Symbol;Acc:HGNC:18206]
ENSG00000154678	1218.36	0.978844	0.0858335	1.74433e-30	3.32181e-29	5137	PDE1C	phosphodiesterase 1C [Source:HGNC Symbol;Acc:HGNC:8776]
ENSG00000099250	983.226	0.977775	0.0981845	1.04615e-23	1.55275e-22	8829	NRP1	neuropilin 1 [Source:HGNC Symbol;Acc:HGNC:8004]
ENSG00000166415	344.907	0.977684	0.135299	2.15811e-13	1.9047e-12	256764	WDR72	WD repeat domain 72 [Source:HGNC Symbol;Acc:HGNC:26790]
ENSG00000107872	273.243	0.976829	0.159863	3.86621e-10	2.68292e-09	79176	FBXL15	F-box and leucine rich repeat protein 15 [Source:HGNC Symbol;Acc:HGNC:28155]
ENSG00000144847	42.9849	0.976708	0.366259	0.0026535	0.00810528	152404	IGSF11	immunoglobulin superfamily member 11 [Source:HGNC Symbol;Acc:HGNC:16669]
ENSG00000143786	67.0661	0.976372	0.286768	0.000256299	0.000936103	149111	CNIH3	cornichon family AMPA receptor auxiliary protein 3 [Source:HGNC Symbol;Acc:HGNC:26802]
ENSG00000165312	211.134	0.97632	0.297161	0.000373474	0.00132972	220213	OTUD1	OTU deubiquitinase 1 [Source:HGNC Symbol;Acc:HGNC:27346]
ENSG00000218510	186.833	0.975908	0.198175	3.19718e-07	1.69158e-06	29092	LINC00339	long intergenic non-protein coding RNA 339 [Source:HGNC Symbol;Acc:HGNC:25011]
ENSG00000181804	41.3234	0.975581	0.40286	0.00493381	0.0142779	285195	SLC9A9	solute carrier family 9 member A9 [Source:HGNC Symbol;Acc:HGNC:20653]
ENSG00000170275	5507.72	0.975364	0.0617703	1.50468e-56	5.44756e-55	10491	CRTAP	cartilage associated protein [Source:HGNC Symbol;Acc:HGNC:2379]
ENSG00000008294	1489.92	0.975193	0.0859468	3.16362e-30	5.95859e-29	9043	SPAG9	sperm associated antigen 9 [Source:HGNC Symbol;Acc:HGNC:14524]
ENSG00000130522	4567.53	0.975181	0.264013	8.75986e-05	0.000343114	3727	JUND	JunD proto-oncogene, AP-1 transcription factor subunit [Source:HGNC Symbol;Acc:HGNC:6206]
ENSG00000133142	541.836	0.974404	0.108209	9.22431e-20	1.13029e-18	79921	TCEAL4	transcription elongation factor A like 4 [Source:HGNC Symbol;Acc:HGNC:26121]
ENSG00000158615	2055.77	0.974257	0.290653	0.00030281	0.00109435	84919	PPP1R15B	protein phosphatase 1 regulatory subunit 15B [Source:HGNC Symbol;Acc:HGNC:14951]
ENSG00000161011	5462.4	0.973374	0.0565092	7.3632e-67	3.3774e-65	8878	SQSTM1	sequestosome 1 [Source:HGNC Symbol;Acc:HGNC:11280]
ENSG00000225614	565.613	0.973282	0.113111	2.93322e-18	3.34467e-17	84627	ZNF469	zinc finger protein 469 [Source:HGNC Symbol;Acc:HGNC:23216]
ENSG00000243753	73.3683	0.972567	0.306998	0.00057318	0.00198568	3139	HLA-L	major histocompatibility complex, class I, L (pseudogene) [Source:HGNC Symbol;Acc:HGNC:4970]
ENSG00000177663	361.678	0.972294	0.147123	1.57708e-11	1.23048e-10	23765	IL17RA	interleukin 17 receptor A [Source:HGNC Symbol;Acc:HGNC:5985]
ENSG00000070413	830.809	0.971245	0.0922782	2.80282e-26	4.56336e-25	9993	DGCR2	DiGeorge syndrome critical region gene 2 [Source:HGNC Symbol;Acc:HGNC:2845]
ENSG00000135414	2095.74	0.97012	0.0718032	5.78451e-42	1.52555e-40	10220	GDF11	growth differentiation factor 11 [Source:HGNC Symbol;Acc:HGNC:4216]
ENSG00000162729	583.457	0.969339	0.115418	1.88739e-17	2.06366e-16	93185	IGSF8	immunoglobulin superfamily member 8 [Source:HGNC Symbol;Acc:HGNC:17813]
ENSG00000162426	45.2252	0.96932	0.358098	0.00242044	0.00745761	50651	SLC45A1	solute carrier family 45 member 1 [Source:HGNC Symbol;Acc:HGNC:17939]
ENSG00000139998	207.748	0.967959	0.173835	1.094e-08	6.69894e-08	376267	RAB15	RAB15, member RAS oncogene family [Source:HGNC Symbol;Acc:HGNC:20150]
ENSG00000110218	300.331	0.967584	0.151248	6.8108e-11	5.05112e-10	24145	PANX1	pannexin 1 [Source:HGNC Symbol;Acc:HGNC:8599]
ENSG00000104763	429.91	0.967037	0.135163	3.54143e-13	3.09017e-12	427	ASAH1	N-acylsphingosine amidohydrolase 1 [Source:HGNC Symbol;Acc:HGNC:735]
ENSG00000165886	510.52	0.966168	0.120477	4.12525e-16	4.21931e-15	80019	UBTD1	ubiquitin domain containing 1 [Source:HGNC Symbol;Acc:HGNC:25683]
ENSG00000142102	381.129	0.965759	0.140594	2.45822e-12	2.03301e-11	80162	PGGHG	protein-glucosylgalactosylhydroxylysine glucosidase [Source:HGNC Symbol;Acc:HGNC:26210]
ENSG00000185499	178.245	0.964389	0.22418	6.52073e-06	2.9763e-05	4582	MUC1	mucin 1, cell surface associated [Source:HGNC Symbol;Acc:HGNC:7508]
ENSG00000171962	64.6368	0.962616	0.330415	0.00134207	0.00436249	83450	DRC3	dynein regulatory complex subunit 3 [Source:HGNC Symbol;Acc:HGNC:25384]
ENSG00000100938	668.112	0.961996	0.109696	7.78647e-19	9.1304e-18	51292	GMPR2	guanosine monophosphate reductase 2 [Source:HGNC Symbol;Acc:HGNC:4377]
ENSG00000148290	395.381	0.961412	0.12516	6.41185e-15	6.23814e-14	6834	SURF1	SURF1 cytochrome c oxidase assembly factor [Source:HGNC Symbol;Acc:HGNC:11474]
ENSG00000172890	446.389	0.961208	0.125717	8.21359e-15	7.93235e-14	55191	NADSYN1	NAD synthetase 1 [Source:HGNC Symbol;Acc:HGNC:29832]
ENSG00000168936	976.685	0.961104	0.0892026	1.94761e-27	3.30842e-26	92305	TMEM129	transmembrane protein 129, E3 ubiquitin ligase [Source:HGNC Symbol;Acc:HGNC:25137]
ENSG00000157593	1468.97	0.960772	0.0794502	4.85991e-34	1.03886e-32	347734	SLC35B2	solute carrier family 35 member B2 [Source:HGNC Symbol;Acc:HGNC:16872]
ENSG00000105767	2741.15	0.960549	0.0737738	3.95235e-39	9.69129e-38	199731	CADM4	cell adhesion molecule 4 [Source:HGNC Symbol;Acc:HGNC:30825]
ENSG00000162614	36.7211	0.960301	0.412953	0.00661722	0.0185861	91624	NEXN	nexilin F-actin binding protein [Source:HGNC Symbol;Acc:HGNC:29557]
ENSG00000213676	950.405	0.960213	0.105757	4.71842e-20	5.88828e-19	1388	ATF6B	activating transcription factor 6 beta [Source:HGNC Symbol;Acc:HGNC:2349]
ENSG00000052795	169.606	0.960003	0.206906	1.34119e-06	6.61943e-06	57600	FNIP2	folliculin interacting protein 2 [Source:HGNC Symbol;Acc:HGNC:29280]
ENSG00000185950	9037.82	0.959617	0.0750711	8.45734e-38	2.00979e-36	8660	IRS2	insulin receptor substrate 2 [Source:HGNC Symbol;Acc:HGNC:6126]
ENSG00000178904	678.905	0.959495	0.113434	1.02618e-17	1.13761e-16	147991	DPY19L3	dpy-19 like C-mannosyltransferase 3 [Source:HGNC Symbol;Acc:HGNC:27120]
ENSG00000196659	80.955	0.959271	0.266717	0.000127284	0.000487195	150737	TTC30B	tetratricopeptide repeat domain 30B [Source:HGNC Symbol;Acc:HGNC:26425]
ENSG00000166710	5027.27	0.958816	0.06056	8.22239e-57	3.00117e-55	567	B2M	beta-2-microglobulin [Source:HGNC Symbol;Acc:HGNC:914]
ENSG00000165507	58.8461	0.958215	0.301758	0.00057935	0.00200519	11067	DEPP1	DEPP1 autophagy regulator [Source:HGNC Symbol;Acc:HGNC:23355]
ENSG00000143545	3037.83	0.958126	0.0631245	2.23298e-52	7.38969e-51	5872	RAB13	RAB13, member RAS oncogene family [Source:HGNC Symbol;Acc:HGNC:9762]
ENSG00000197816	36.1898	0.957935	0.454072	0.0107285	0.0286667	100499483	CCDC180	coiled-coil domain containing 180 [Source:HGNC Symbol;Acc:HGNC:29303]
ENSG00000231789	52.711	0.956916	0.322233	0.00114862	0.0037877	101929074	PIK3CD-AS2	PIK3CD antisense RNA 2 [Source:HGNC Symbol;Acc:HGNC:51334]
ENSG00000121068	987.609	0.956778	0.11331	1.27641e-17	1.40941e-16	6909	TBX2	T-box transcription factor 2 [Source:HGNC Symbol;Acc:HGNC:11597]
ENSG00000166507	227.631	0.956129	0.198414	5.70428e-07	2.93735e-06	8509	NDST2	N-deacetylase and N-sulfotransferase 2 [Source:HGNC Symbol;Acc:HGNC:7681]
ENSG00000181264	210.899	0.955873	0.179502	4.45142e-08	2.57139e-07	219902	TLCD5	TLC domain containing 5 [Source:HGNC Symbol;Acc:HGNC:28280]
ENSG00000070269	154.772	0.955813	0.254385	6.144e-05	0.000245211	54916	TMEM260	transmembrane protein 260 [Source:HGNC Symbol;Acc:HGNC:20185]
ENSG00000131398	210.725	0.955519	0.166894	4.25328e-09	2.71845e-08	3748	KCNC3	potassium voltage-gated channel subfamily C member 3 [Source:HGNC Symbol;Acc:HGNC:6235]
ENSG00000142687	1552.75	0.954236	0.0923437	2.18288e-25	3.43389e-24	79932	KIAA0319L	KIAA0319 like [Source:HGNC Symbol;Acc:HGNC:30071]
ENSG00000101104	1297.91	0.953796	0.103975	1.93494e-20	2.45305e-19	80336	PABPC1L	poly(A) binding protein cytoplasmic 1 like [Source:HGNC Symbol;Acc:HGNC:15797]
ENSG00000135253	38.6879	0.953278	0.375699	0.00407393	0.0119852	375616	KCP	kielin cysteine rich BMP regulator [Source:HGNC Symbol;Acc:HGNC:17585]
ENSG00000188931	35.5748	0.952714	0.413713	0.00730792	0.0203268	257177	CFAP126	cilia and flagella associated protein 126 [Source:HGNC Symbol;Acc:HGNC:32325]
ENSG00000137364	242.36	0.951162	0.156519	5.00654e-10	3.44854e-09	7172	TPMT	thiopurine S-methyltransferase [Source:HGNC Symbol;Acc:HGNC:12014]
ENSG00000080947	81.3777	0.95082	0.343282	0.00194558	0.00613066	114819	CROCCP3	CROCC pseudogene 3 [Source:HGNC Symbol;Acc:HGNC:29405]
ENSG00000178188	1219.84	0.950778	0.0889504	5.224e-27	8.702e-26	25970	SH2B1	SH2B adaptor protein 1 [Source:HGNC Symbol;Acc:HGNC:30417]
ENSG00000117906	1586.43	0.949984	0.0812794	6.69761e-32	1.3406e-30	5955	RCN2	reticulocalbin 2 [Source:HGNC Symbol;Acc:HGNC:9935]
ENSG00000228223	327.798	0.949314	0.134855	8.0282e-13	6.83437e-12	493812	HCG11	HLA complex group 11 [Source:HGNC Symbol;Acc:HGNC:17707]
ENSG00000137207	1078.62	0.949267	0.104525	4.79034e-20	5.96802e-19	25844	YIPF3	Yip1 domain family member 3 [Source:HGNC Symbol;Acc:HGNC:21023]
ENSG00000186376	101.495	0.949248	0.247119	4.93715e-05	0.000199216	7626	ZNF75D	zinc finger protein 75D [Source:HGNC Symbol;Acc:HGNC:13145]
ENSG00000269556	270.198	0.948906	0.165157	3.95648e-09	2.53673e-08	84548	TMEM185A	transmembrane protein 185A [Source:HGNC Symbol;Acc:HGNC:17125]
ENSG00000186889	76.5524	0.948906	0.263033	0.000120808	0.000464237	200728	TMEM17	transmembrane protein 17 [Source:HGNC Symbol;Acc:HGNC:26623]
ENSG00000162194	194.182	0.94817	0.191393	2.76544e-07	1.47574e-06	79081	LBHD1	LBH domain containing 1 [Source:HGNC Symbol;Acc:HGNC:28351]
ENSG00000225206	41.7258	0.948151	0.352294	0.00266719	0.00814152	400765	MIR137HG	MIR137 host gene [Source:HGNC Symbol;Acc:HGNC:42871]
ENSG00000130702	4618.91	0.948107	0.0652083	2.90157e-48	8.7352e-47	3911	LAMA5	laminin subunit alpha 5 [Source:HGNC Symbol;Acc:HGNC:6485]
ENSG00000221978	3014.36	0.948004	0.0722855	1.19402e-39	2.96355e-38	81669	CCNL2	cyclin L2 [Source:HGNC Symbol;Acc:HGNC:20570]
ENSG00000170558	2038.15	0.947502	0.070808	3.75887e-41	9.707e-40	1000	CDH2	cadherin 2 [Source:HGNC Symbol;Acc:HGNC:1759]
ENSG00000241935	33.8015	0.946778	0.410162	0.00754274	0.0209356	112817	HOGA1	4-hydroxy-2-oxoglutarate aldolase 1 [Source:HGNC Symbol;Acc:HGNC:25155]
ENSG00000197496	68.6972	0.946313	0.330042	0.00159084	0.00509919	81031	SLC2A10	solute carrier family 2 member 10 [Source:HGNC Symbol;Acc:HGNC:13444]
ENSG00000160685	627.752	0.944864	0.130703	1.92301e-13	1.70461e-12	51043	ZBTB7B	zinc finger and BTB domain containing 7B [Source:HGNC Symbol;Acc:HGNC:18668]
ENSG00000139329	51.5894	0.944188	0.335822	0.00180825	0.00573434	4060	LUM	lumican [Source:HGNC Symbol;Acc:HGNC:6724]
ENSG00000104946	706.668	0.943304	0.0991077	7.53379e-22	1.0293e-20	79735	TBC1D17	TBC1 domain family member 17 [Source:HGNC Symbol;Acc:HGNC:25699]
ENSG00000116774	41.0262	0.943265	0.356488	0.00307679	0.00928697	56944	OLFML3	olfactomedin like 3 [Source:HGNC Symbol;Acc:HGNC:24956]
ENSG00000111897	1400.14	0.943093	0.0767849	4.94291e-35	1.08998e-33	57515	SERINC1	serine incorporator 1 [Source:HGNC Symbol;Acc:HGNC:13464]
ENSG00000196981	144.191	0.941889	0.206365	2.1662e-06	1.04353e-05	54554	WDR5B	WD repeat domain 5B [Source:HGNC Symbol;Acc:HGNC:17826]
ENSG00000197530	954.824	0.941784	0.0917117	3.8574e-25	6.00882e-24	142678	MIB2	MIB E3 ubiquitin protein ligase 2 [Source:HGNC Symbol;Acc:HGNC:30577]
ENSG00000182636	218.154	0.941377	0.176459	4.18231e-08	2.42158e-07	4692	NDN	necdin, MAGE family member [Source:HGNC Symbol;Acc:HGNC:7675]
ENSG00000092330	338.569	0.941035	0.158155	1.03581e-09	6.98611e-09	26277	TINF2	TERF1 interacting nuclear factor 2 [Source:HGNC Symbol;Acc:HGNC:11824]
ENSG00000257727	1325.36	0.940421	0.0896991	4.68976e-26	7.56389e-25	10330	CNPY2	canopy FGF signaling regulator 2 [Source:HGNC Symbol;Acc:HGNC:13529]
ENSG00000131626	1323.63	0.940298	0.0818925	7.5475e-31	1.44966e-29	8500	PPFIA1	PTPRF interacting protein alpha 1 [Source:HGNC Symbol;Acc:HGNC:9245]
ENSG00000162430	4547.05	0.939955	0.063543	7.22672e-50	2.25147e-48	57190	SELENON	selenoprotein N [Source:HGNC Symbol;Acc:HGNC:15999]
ENSG00000180921	181.389	0.939306	0.17906	6.39933e-08	3.63828e-07	286077	FAM83H	family with sequence similarity 83 member H [Source:HGNC Symbol;Acc:HGNC:24797]
ENSG00000187189	331.66	0.93901	0.14012	8.70809e-12	6.93975e-11	23270	TSPYL4	TSPY like 4 [Source:HGNC Symbol;Acc:HGNC:21559]
ENSG00000141012	383.399	0.938356	0.137454	3.4465e-12	2.82836e-11	2588	GALNS	galactosamine (N-acetyl)-6-sulfatase [Source:HGNC Symbol;Acc:HGNC:4122]
ENSG00000162994	49.2879	0.938272	0.345591	0.0024676	0.00758827	130162	CLHC1	clathrin heavy chain linker domain containing 1 [Source:HGNC Symbol;Acc:HGNC:26453]
ENSG00000179163	271.552	0.937875	0.149961	1.69501e-10	1.21785e-09	2517	FUCA1	alpha-L-fucosidase 1 [Source:HGNC Symbol;Acc:HGNC:4006]
ENSG00000139508	41.146	0.936466	0.357532	0.0033053	0.00991058	283537	SLC46A3	solute carrier family 46 member 3 [Source:HGNC Symbol;Acc:HGNC:27501]
ENSG00000107537	198.372	0.936444	0.172223	2.4054e-08	1.42638e-07	5264	PHYH	phytanoyl-CoA 2-hydroxylase [Source:HGNC Symbol;Acc:HGNC:8940]
ENSG00000129925	1675.75	0.936339	0.0823896	2.53664e-30	4.79793e-29	58986	PGAP6	post-glycosylphosphatidylinositol attachment to proteins 6 [Source:HGNC Symbol;Acc:HGNC:17205]
ENSG00000174652	345.818	0.936289	0.137481	4.22748e-12	3.43895e-11	10781	ZNF266	zinc finger protein 266 [Source:HGNC Symbol;Acc:HGNC:13059]
ENSG00000087301	76.3671	0.935785	0.303216	0.000763541	0.00258934	57544	TXNDC16	thioredoxin domain containing 16 [Source:HGNC Symbol;Acc:HGNC:19965]
ENSG00000146828	651.662	0.935649	0.0984827	9.06767e-22	1.23358e-20	56996	SLC12A9	solute carrier family 12 member 9 [Source:HGNC Symbol;Acc:HGNC:17435]
ENSG00000135315	70.7142	0.934933	0.325835	0.00158287	0.00507802	22832	CEP162	centrosomal protein 162 [Source:HGNC Symbol;Acc:HGNC:21107]
ENSG00000115998	97.3883	0.934517	0.280348	0.000357135	0.00127561	54980	C2orf42	chromosome 2 open reading frame 42 [Source:HGNC Symbol;Acc:HGNC:26056]
ENSG00000257923	1963.65	0.934378	0.0701314	8.02817e-41	2.05422e-39	1523	CUX1	cut like homeobox 1 [Source:HGNC Symbol;Acc:HGNC:2557]
ENSG00000157259	765.754	0.932011	0.097756	6.83204e-22	9.35136e-21	57798	GATAD1	GATA zinc finger domain containing 1 [Source:HGNC Symbol;Acc:HGNC:29941]
ENSG00000130958	403.667	0.930856	0.127899	1.53955e-13	1.37177e-12	11046	SLC35D2	solute carrier family 35 member D2 [Source:HGNC Symbol;Acc:HGNC:20799]
ENSG00000149591	84.0249	0.930717	0.284048	0.000434902	0.00153376	6876	TAGLN	transgelin [Source:HGNC Symbol;Acc:HGNC:11553]
ENSG00000130724	1747.61	0.929638	0.0803404	2.53801e-31	4.9819e-30	27243	CHMP2A	charged multivesicular body protein 2A [Source:HGNC Symbol;Acc:HGNC:30216]
ENSG00000240849	815.502	0.929595	0.106693	1.32578e-18	1.54086e-17	387521	PEDS1	plasmanylethanolamine desaturase 1 [Source:HGNC Symbol;Acc:HGNC:16735]
ENSG00000103174	301.24	0.929532	0.148322	1.52221e-10	1.09759e-09	51172	NAGPA	N-acetylglucosamine-1-phosphodiester alpha-N-acetylglucosaminidase [Source:HGNC Symbol;Acc:HGNC:17378]
ENSG00000181722	142.686	0.928675	0.336593	0.00211442	0.00660586	26137	ZBTB20	zinc finger and BTB domain containing 20 [Source:HGNC Symbol;Acc:HGNC:13503]
ENSG00000196663	454.625	0.927948	0.377786	0.00524524	0.0150893	9895	TECPR2	tectonin beta-propeller repeat containing 2 [Source:HGNC Symbol;Acc:HGNC:19957]
ENSG00000197302	133.899	0.927215	0.262274	0.000167636	0.00063052	124411	ZNF720	zinc finger protein 720 [Source:HGNC Symbol;Acc:HGNC:26987]
ENSG00000185813	779.782	0.926983	0.101633	3.53371e-20	4.43711e-19	5833	PCYT2	phosphate cytidylyltransferase 2, ethanolamine [Source:HGNC Symbol;Acc:HGNC:8756]
ENSG00000134313	862.847	0.926846	0.100604	1.43984e-20	1.83579e-19	57498	KIDINS220	kinase D interacting substrate 220 [Source:HGNC Symbol;Acc:HGNC:29508]
ENSG00000165494	373.128	0.926689	0.136322	4.74641e-12	3.84987e-11	51585	PCF11	PCF11 cleavage and polyadenylation factor subunit [Source:HGNC Symbol;Acc:HGNC:30097]
ENSG00000164187	232.096	0.926626	0.161985	4.61224e-09	2.93361e-08	92255	LMBRD2	LMBR1 domain containing 2 [Source:HGNC Symbol;Acc:HGNC:25287]
ENSG00000180879	1019.14	0.926523	0.0879964	2.93872e-26	4.78115e-25	6748	SSR4	signal sequence receptor subunit 4 [Source:HGNC Symbol;Acc:HGNC:11326]
ENSG00000165915	791.803	0.926337	0.106644	1.55026e-18	1.79428e-17	91252	SLC39A13	solute carrier family 39 member 13 [Source:HGNC Symbol;Acc:HGNC:20859]
ENSG00000099992	252.377	0.926334	0.152495	5.16701e-10	3.54922e-09	83874	TBC1D10A	TBC1 domain family member 10A [Source:HGNC Symbol;Acc:HGNC:23609]
ENSG00000160226	332.923	0.925876	0.138149	9.04064e-12	7.19451e-11	755	CFAP410	cilia and flagella associated protein 410 [Source:HGNC Symbol;Acc:HGNC:1260]
ENSG00000124067	986.796	0.925224	0.101842	4.79801e-20	5.97424e-19	6560	SLC12A4	solute carrier family 12 member 4 [Source:HGNC Symbol;Acc:HGNC:10913]
ENSG00000137558	117.08	0.924615	0.213073	6.06365e-06	2.78017e-05	51050	PI15	peptidase inhibitor 15 [Source:HGNC Symbol;Acc:HGNC:8946]
ENSG00000188811	148.251	0.924549	0.238082	4.32752e-05	0.000176402	387921	NHLRC3	NHL repeat containing 3 [Source:HGNC Symbol;Acc:HGNC:33751]
ENSG00000081665	195.088	0.924224	0.190598	5.04226e-07	2.61332e-06	440515	ZNF506	zinc finger protein 506 [Source:HGNC Symbol;Acc:HGNC:23780]
ENSG00000089639	578.424	0.923994	0.115063	4.16104e-16	4.25397e-15	51291	GMIP	GEM interacting protein [Source:HGNC Symbol;Acc:HGNC:24852]
ENSG00000213445	1316.8	0.92369	0.0946404	7.35089e-23	1.04722e-21	6494	SIPA1	signal-induced proliferation-associated 1 [Source:HGNC Symbol;Acc:HGNC:10885]
ENSG00000225190	552.324	0.923227	0.13877	1.16493e-11	9.17891e-11	9842	PLEKHM1	pleckstrin homology and RUN domain containing M1 [Source:HGNC Symbol;Acc:HGNC:29017]
ENSG00000068903	458.3	0.923092	0.125464	7.9009e-14	7.18901e-13	22933	SIRT2	sirtuin 2 [Source:HGNC Symbol;Acc:HGNC:10886]
ENSG00000124201	908.028	0.922675	0.109524	1.71036e-17	1.87468e-16	57169	ZNFX1	zinc finger NFX1-type containing 1 [Source:HGNC Symbol;Acc:HGNC:29271]
ENSG00000011677	196.097	0.921793	0.171384	3.33638e-08	1.95253e-07	2556	GABRA3	gamma-aminobutyric acid type A receptor subunit alpha3 [Source:HGNC Symbol;Acc:HGNC:4077]
ENSG00000109586	370.149	0.921786	0.140567	2.43869e-11	1.87588e-10	51809	GALNT7	polypeptide N-acetylgalactosaminyltransferase 7 [Source:HGNC Symbol;Acc:HGNC:4129]
ENSG00000126709	264.886	0.921543	0.168244	1.93452e-08	1.15822e-07	2537	IFI6	interferon alpha inducible protein 6 [Source:HGNC Symbol;Acc:HGNC:4054]
ENSG00000090975	721.164	0.920284	0.10328	2.25726e-19	2.70363e-18	57605	PITPNM2	phosphatidylinositol transfer protein membrane associated 2 [Source:HGNC Symbol;Acc:HGNC:21044]
ENSG00000164877	564.459	0.920097	0.170623	2.8184e-08	1.66158e-07	79778	MICALL2	MICAL like 2 [Source:HGNC Symbol;Acc:HGNC:29672]
ENSG00000185634	234.107	0.920059	0.192337	7.6582e-07	3.88462e-06	399694	SHC4	SHC adaptor protein 4 [Source:HGNC Symbol;Acc:HGNC:16743]
ENSG00000128596	202.614	0.919728	0.173901	5.47672e-08	3.1369e-07	64753	CCDC136	coiled-coil domain containing 136 [Source:HGNC Symbol;Acc:HGNC:22225]
ENSG00000265666	103.534	0.918897	0.256729	0.000138624	0.000528426	101929693	RARA-AS1	RARA antisense RNA 1 [Source:HGNC Symbol;Acc:HGNC:49577]
ENSG00000178980	918.072	0.9183	0.0919902	7.76536e-24	1.15873e-22	6415	SELENOW	selenoprotein W [Source:HGNC Symbol;Acc:HGNC:10752]
ENSG00000175482	539.779	0.918282	0.118464	3.83722e-15	3.76939e-14	57804	POLD4	DNA polymerase delta 4, accessory subunit [Source:HGNC Symbol;Acc:HGNC:14106]
ENSG00000132185	495.565	0.918102	0.136376	7.4127e-12	5.93281e-11	84824	FCRLA	Fc receptor like A [Source:HGNC Symbol;Acc:HGNC:18504]
ENSG00000179532	462.741	0.917904	0.183224	2.35924e-07	1.26776e-06	144132	DNHD1	dynein heavy chain domain 1 [Source:HGNC Symbol;Acc:HGNC:26532]
ENSG00000250510	65.4157	0.917158	0.324051	0.00174363	0.00554358	27239	GPR162	G protein-coupled receptor 162 [Source:HGNC Symbol;Acc:HGNC:16693]
ENSG00000204387	852.047	0.916584	0.106998	4.82174e-18	5.43706e-17	50854	SNHG32	small nucleolar RNA host gene 32 [Source:HGNC Symbol;Acc:HGNC:19078]
ENSG00000101844	99.1908	0.916525	0.256687	0.000149483	0.000567497	115201	ATG4A	autophagy related 4A cysteine peptidase [Source:HGNC Symbol;Acc:HGNC:16489]
ENSG00000100246	126.164	0.916268	0.207542	4.38328e-06	2.03647e-05	10126	DNAL4	dynein axonemal light chain 4 [Source:HGNC Symbol;Acc:HGNC:2955]
ENSG00000107551	78.4416	0.915835	0.299393	0.000895371	0.00300354	83937	RASSF4	Ras association domain family member 4 [Source:HGNC Symbol;Acc:HGNC:20793]
ENSG00000121236	80.2007	0.91574	0.268046	0.000267154	0.000973363	117854	TRIM6	tripartite motif containing 6 [Source:HGNC Symbol;Acc:HGNC:16277]
ENSG00000196914	2228.96	0.915565	0.0668272	4.65178e-43	1.25801e-41	23365	ARHGEF12	Rho guanine nucleotide exchange factor 12 [Source:HGNC Symbol;Acc:HGNC:14193]
ENSG00000112773	322.344	0.915504	0.148432	2.87944e-10	2.02586e-09	55603	TENT5A	terminal nucleotidyltransferase 5A [Source:HGNC Symbol;Acc:HGNC:18345]
ENSG00000168490	64.8009	0.915409	0.31366	0.00142885	0.00462104	9796	PHYHIP	phytanoyl-CoA 2-hydroxylase interacting protein [Source:HGNC Symbol;Acc:HGNC:16865]
ENSG00000044090	1180.06	0.915108	0.0847868	1.60928e-27	2.74622e-26	9820	CUL7	cullin 7 [Source:HGNC Symbol;Acc:HGNC:21024]
ENSG00000167272	355.645	0.915013	0.134628	4.86773e-12	3.94684e-11	51367	POP5	POP5 homolog, ribonuclease P/MRP subunit [Source:HGNC Symbol;Acc:HGNC:17689]
ENSG00000251322	115.554	0.914946	0.229798	2.86706e-05	0.000120203	85358	SHANK3	SH3 and multiple ankyrin repeat domains 3 [Source:HGNC Symbol;Acc:HGNC:14294]
ENSG00000169964	152.593	0.913745	0.19336	9.96757e-07	4.99676e-06	131616	TMEM42	transmembrane protein 42 [Source:HGNC Symbol;Acc:HGNC:28444]
ENSG00000184584	730.686	0.913253	0.113938	4.53647e-16	4.62509e-15	340061	STING1	stimulator of interferon response cGAMP interactor 1 [Source:HGNC Symbol;Acc:HGNC:27962]
ENSG00000164088	363.535	0.9131	0.140809	3.88579e-11	2.9404e-10	132160	PPM1M	protein phosphatase, Mg2+/Mn2+ dependent 1M [Source:HGNC Symbol;Acc:HGNC:26506]
ENSG00000125434	151.144	0.912634	0.190895	7.47159e-07	3.79405e-06	399512	SLC25A35	solute carrier family 25 member 35 [Source:HGNC Symbol;Acc:HGNC:31921]
ENSG00000235919	49.2267	0.912536	0.334905	0.00266373	0.00813318	645676	ASH1L-AS1	ASH1L antisense RNA 1 [Source:HGNC Symbol;Acc:HGNC:44146]
ENSG00000182621	295.292	0.912386	0.182709	2.57236e-07	1.37764e-06	23236	PLCB1	phospholipase C beta 1 [Source:HGNC Symbol;Acc:HGNC:15917]
ENSG00000126062	1046.31	0.912015	0.0851455	4.04294e-27	6.76995e-26	11070	TMEM115	transmembrane protein 115 [Source:HGNC Symbol;Acc:HGNC:30055]
ENSG00000136531	63.1279	0.911717	0.308362	0.00129876	0.00423652	6326	SCN2A	sodium voltage-gated channel alpha subunit 2 [Source:HGNC Symbol;Acc:HGNC:10588]
ENSG00000235194	61.9013	0.910948	0.320574	0.00183968	0.00582491	90673	PPP1R3E	protein phosphatase 1 regulatory subunit 3E [Source:HGNC Symbol;Acc:HGNC:14943]
ENSG00000117151	168.797	0.910482	0.188664	6.24455e-07	3.20374e-06	1486	CTBS	chitobiase [Source:HGNC Symbol;Acc:HGNC:2496]
ENSG00000163710	169.089	0.910197	0.190485	7.89902e-07	3.99566e-06	26577	PCOLCE2	procollagen C-endopeptidase enhancer 2 [Source:HGNC Symbol;Acc:HGNC:8739]
ENSG00000196683	1181.49	0.909833	0.0841186	1.295e-27	2.22009e-26	54543	TOMM7	translocase of outer mitochondrial membrane 7 [Source:HGNC Symbol;Acc:HGNC:21648]
ENSG00000118804	90.7372	0.909022	0.249256	0.000111696	0.000431	8987	STBD1	starch binding domain 1 [Source:HGNC Symbol;Acc:HGNC:24854]
ENSG00000159403	251.381	0.908433	0.198631	1.93318e-06	9.37955e-06	715	C1R	complement C1r [Source:HGNC Symbol;Acc:HGNC:1246]
ENSG00000204965	160.034	0.908173	0.188025	5.85743e-07	3.01205e-06	56143	PCDHA5	protocadherin alpha 5 [Source:HGNC Symbol;Acc:HGNC:8671]
ENSG00000184154	74.2309	0.908013	0.356374	0.00422659	0.0123935	220074	LRTOMT	leucine rich transmembrane and O-methyltransferase domain containing [Source:HGNC Symbol;Acc:HGNC:25033]
ENSG00000117640	866.8	0.907336	0.0914859	1.56969e-23	2.31596e-22	56181	MTFR1L	mitochondrial fission regulator 1 like [Source:HGNC Symbol;Acc:HGNC:28836]
ENSG00000111224	87.1427	0.907325	0.270728	0.000322362	0.00115882	57097	PARP11	poly(ADP-ribose) polymerase family member 11 [Source:HGNC Symbol;Acc:HGNC:1186]
ENSG00000213626	54.3213	0.907146	0.3105	0.00142766	0.00461787	81606	LBH	LBH regulator of WNT signaling pathway [Source:HGNC Symbol;Acc:HGNC:29532]
ENSG00000224470	590.829	0.906763	0.107799	1.84321e-17	2.01634e-16	342371	ATXN1L	ataxin 1 like [Source:HGNC Symbol;Acc:HGNC:33279]
ENSG00000133704	1406.79	0.906703	0.0866621	5.82871e-26	9.34016e-25	10526	IPO8	importin 8 [Source:HGNC Symbol;Acc:HGNC:9853]
ENSG00000115561	1105.42	0.90663	0.102916	5.99091e-19	7.05456e-18	51652	CHMP3	charged multivesicular body protein 3 [Source:HGNC Symbol;Acc:HGNC:29865]
ENSG00000181284	174.079	0.906143	0.186494	5.38402e-07	2.7782e-06	284114	TMEM102	transmembrane protein 102 [Source:HGNC Symbol;Acc:HGNC:26722]
ENSG00000008516	48.2043	0.905515	0.332663	0.00265594	0.00811052	64386	MMP25	matrix metallopeptidase 25 [Source:HGNC Symbol;Acc:HGNC:14246]
ENSG00000073464	174.282	0.90545	0.252707	0.000139123	0.000530238	1183	CLCN4	chloride voltage-gated channel 4 [Source:HGNC Symbol;Acc:HGNC:2022]
ENSG00000257315	877.292	0.904758	0.15226	1.22607e-09	8.22215e-09	100381270	ZBED6	zinc finger BED-type containing 6 [Source:HGNC Symbol;Acc:HGNC:33273]
ENSG00000162734	2352.67	0.904354	0.0845028	4.47592e-27	7.47816e-26	8682	PEA15	proliferation and apoptosis adaptor protein 15 [Source:HGNC Symbol;Acc:HGNC:8822]
ENSG00000273213	206.616	0.903765	0.169636	4.28951e-08	2.48159e-07	440686	H3-2	H3.2 histone (putative) [Source:HGNC Symbol;Acc:HGNC:32060]
ENSG00000142892	408.07	0.903025	0.171092	5.82866e-08	3.32909e-07	10026	PIGK	phosphatidylinositol glycan anchor biosynthesis class K [Source:HGNC Symbol;Acc:HGNC:8965]
ENSG00000139044	233.953	0.90282	0.159164	6.11151e-09	3.82835e-08	283358	B4GALNT3	beta-1,4-N-acetyl-galactosaminyltransferase 3 [Source:HGNC Symbol;Acc:HGNC:24137]
ENSG00000117758	429.611	0.900737	0.125342	3.12846e-13	2.73731e-12	23673	STX12	syntaxin 12 [Source:HGNC Symbol;Acc:HGNC:11430]
ENSG00000237187	71.0224	0.900229	0.305026	0.0012985	0.00423652	441094	NR2F1-AS1	NR2F1 antisense RNA 1 [Source:HGNC Symbol;Acc:HGNC:48622]
ENSG00000065361	8396.31	0.900016	0.0640053	3.08517e-45	8.69062e-44	2065	ERBB3	erb-b2 receptor tyrosine kinase 3 [Source:HGNC Symbol;Acc:HGNC:3431]
ENSG00000150907	263.545	0.899862	0.166608	2.97499e-08	1.75067e-07	2308	FOXO1	forkhead box O1 [Source:HGNC Symbol;Acc:HGNC:3819]
ENSG00000166912	366.532	0.89922	0.13173	4.17116e-12	3.39932e-11	54893	MTMR10	myotubularin related protein 10 [Source:HGNC Symbol;Acc:HGNC:25999]
ENSG00000121310	321.862	0.899184	0.14135	9.2839e-11	6.80616e-10	55268	ECHDC2	enoyl-CoA hydratase domain containing 2 [Source:HGNC Symbol;Acc:HGNC:23408]
ENSG00000213462	83.7624	0.899076	0.326481	0.00226984	0.00704414	2086	ERV3-1	endogenous retrovirus group 3 member 1, envelope [Source:HGNC Symbol;Acc:HGNC:3454]
ENSG00000109083	363.249	0.898965	0.13641	1.97306e-11	1.52559e-10	90410	IFT20	intraflagellar transport 20 [Source:HGNC Symbol;Acc:HGNC:30989]
ENSG00000178764	69.8668	0.897257	0.283966	0.000664436	0.00227431	22882	ZHX2	zinc fingers and homeoboxes 2 [Source:HGNC Symbol;Acc:HGNC:18513]
ENSG00000142327	818.855	0.896874	0.121527	7.32034e-14	6.66619e-13	57140	RNPEPL1	arginyl aminopeptidase like 1 [Source:HGNC Symbol;Acc:HGNC:10079]
ENSG00000163683	296.831	0.89677	0.160365	1.05568e-08	6.47674e-08	201895	SMIM14	small integral membrane protein 14 [Source:HGNC Symbol;Acc:HGNC:27321]
ENSG00000111077	2173.81	0.89586	0.0838403	5.58973e-27	9.30428e-26	23371	TNS2	tensin 2 [Source:HGNC Symbol;Acc:HGNC:19737]
ENSG00000160094	483.119	0.893243	0.117372	1.18905e-14	1.13751e-13	149076	ZNF362	zinc finger protein 362 [Source:HGNC Symbol;Acc:HGNC:18079]
ENSG00000151498	346.506	0.892521	0.134209	1.34515e-11	1.05395e-10	27034	ACAD8	acyl-CoA dehydrogenase family member 8 [Source:HGNC Symbol;Acc:HGNC:87]
ENSG00000112852	420.066	0.892229	0.136548	2.85223e-11	2.18121e-10	56133	PCDHB2	protocadherin beta 2 [Source:HGNC Symbol;Acc:HGNC:8687]
ENSG00000197702	870.387	0.892197	0.103911	3.74926e-18	4.25564e-17	55742	PARVA	parvin alpha [Source:HGNC Symbol;Acc:HGNC:14652]
ENSG00000140563	78.5724	0.890457	0.30889	0.00157871	0.00506683	55784	MCTP2	multiple C2 and transmembrane domain containing 2 [Source:HGNC Symbol;Acc:HGNC:25636]
ENSG00000248487	132.65	0.890203	0.20459	6.20051e-06	2.83942e-05	25864	ABHD14A	abhydrolase domain containing 14A [Source:HGNC Symbol;Acc:HGNC:24538]
ENSG00000113369	391.545	0.890067	0.135955	2.77021e-11	2.12139e-10	57561	ARRDC3	arrestin domain containing 3 [Source:HGNC Symbol;Acc:HGNC:29263]
ENSG00000170348	1813.72	0.890055	0.0843739	2.50493e-26	4.09029e-25	10972	TMED10	transmembrane p24 trafficking protein 10 [Source:HGNC Symbol;Acc:HGNC:16998]
ENSG00000181444	34.8558	0.88892	0.41565	0.0121432	0.0320671	168544	ZNF467	zinc finger protein 467 [Source:HGNC Symbol;Acc:HGNC:23154]
ENSG00000021826	305.298	0.888517	0.142404	2.01429e-10	1.43801e-09	1373	CPS1	carbamoyl-phosphate synthase 1 [Source:HGNC Symbol;Acc:HGNC:2323]
ENSG00000171867	4089.42	0.888455	0.0613822	8.44566e-48	2.50876e-46	5621	PRNP	prion protein [Source:HGNC Symbol;Acc:HGNC:9449]
ENSG00000102786	485.233	0.887455	0.126243	9.53799e-13	8.08882e-12	26512	INTS6	integrator complex subunit 6 [Source:HGNC Symbol;Acc:HGNC:14879]
ENSG00000164331	136.494	0.886862	0.225122	3.68939e-05	0.000152251	57763	ANKRA2	ankyrin repeat family A member 2 [Source:HGNC Symbol;Acc:HGNC:13208]
ENSG00000155254	1927.76	0.886734	0.0728374	2.0864e-34	4.49431e-33	83742	MARVELD1	MARVEL domain containing 1 [Source:HGNC Symbol;Acc:HGNC:28674]
ENSG00000102024	863.211	0.886516	0.0946506	3.73561e-21	4.92017e-20	5358	PLS3	plastin 3 [Source:HGNC Symbol;Acc:HGNC:9091]
ENSG00000105404	826.288	0.883104	0.0969458	4.03585e-20	5.05058e-19	10567	RABAC1	Rab acceptor 1 [Source:HGNC Symbol;Acc:HGNC:9794]
ENSG00000132357	110.535	0.882231	0.219148	2.56504e-05	0.000108232	84674	CARD6	caspase recruitment domain family member 6 [Source:HGNC Symbol;Acc:HGNC:16394]
ENSG00000116191	579.516	0.881729	0.154913	5.94992e-09	3.73131e-08	55103	RALGPS2	Ral GEF with PH domain and SH3 binding motif 2 [Source:HGNC Symbol;Acc:HGNC:30279]
ENSG00000075399	361.487	0.881578	0.135056	3.0784e-11	2.34774e-10	9605	VPS9D1	VPS9 domain containing 1 [Source:HGNC Symbol;Acc:HGNC:13526]
ENSG00000140526	1534.07	0.878993	0.0859162	7.01104e-25	1.08233e-23	11057	ABHD2	abhydrolase domain containing 2, acylglycerol lipase [Source:HGNC Symbol;Acc:HGNC:18717]
ENSG00000149600	314.683	0.878858	0.147411	1.12721e-09	7.57968e-09	149951	COMMD7	COMM domain containing 7 [Source:HGNC Symbol;Acc:HGNC:16223]
ENSG00000185507	99.9787	0.878053	0.238201	0.0001031	0.000399764	3665	IRF7	interferon regulatory factor 7 [Source:HGNC Symbol;Acc:HGNC:6122]
ENSG00000135636	135.506	0.877985	0.203714	7.15136e-06	3.2436e-05	8291	DYSF	dysferlin [Source:HGNC Symbol;Acc:HGNC:3097]
ENSG00000108679	9494.42	0.877509	0.057045	1.1227e-53	3.81137e-52	3959	LGALS3BP	galectin 3 binding protein [Source:HGNC Symbol;Acc:HGNC:6564]
ENSG00000023318	719.378	0.877364	0.105382	4.03423e-17	4.34088e-16	23071	ERP44	endoplasmic reticulum protein 44 [Source:HGNC Symbol;Acc:HGNC:18311]
ENSG00000109854	382.025	0.876287	0.132189	1.5119e-11	1.1817e-10	10553	HTATIP2	HIV-1 Tat interactive protein 2 [Source:HGNC Symbol;Acc:HGNC:16637]
ENSG00000149809	246.134	0.87588	0.158613	1.56861e-08	9.49067e-08	7108	TM7SF2	transmembrane 7 superfamily member 2 [Source:HGNC Symbol;Acc:HGNC:11863]
ENSG00000120129	746.579	0.875871	0.154344	6.39159e-09	3.9926e-08	1843	DUSP1	dual specificity phosphatase 1 [Source:HGNC Symbol;Acc:HGNC:3064]
ENSG00000177239	1213.94	0.875525	0.0827936	1.90717e-26	3.12793e-25	11253	MAN1B1	mannosidase alpha class 1B member 1 [Source:HGNC Symbol;Acc:HGNC:6823]
ENSG00000148411	1386.86	0.873267	0.0746047	5.73444e-32	1.15194e-30	138151	NACC2	NACC family member 2 [Source:HGNC Symbol;Acc:HGNC:23846]
ENSG00000155366	2773.99	0.872141	0.0626033	2.00252e-44	5.54305e-43	389	RHOC	ras homolog family member C [Source:HGNC Symbol;Acc:HGNC:669]
ENSG00000153936	585.956	0.871064	0.106612	1.47873e-16	1.53923e-15	9653	HS2ST1	heparan sulfate 2-O-sulfotransferase 1 [Source:HGNC Symbol;Acc:HGNC:5193]
ENSG00000220205	395.924	0.870791	0.146925	1.42677e-09	9.51377e-09	6844	VAMP2	vesicle associated membrane protein 2 [Source:HGNC Symbol;Acc:HGNC:12643]
ENSG00000164949	76.1732	0.870782	0.323501	0.00295873	0.00895195	2669	GEM	GTP binding protein overexpressed in skeletal muscle [Source:HGNC Symbol;Acc:HGNC:4234]
ENSG00000174483	400.244	0.870124	0.131321	1.68859e-11	1.31382e-10	582	BBS1	Bardet-Biedl syndrome 1 [Source:HGNC Symbol;Acc:HGNC:966]
ENSG00000100364	967.209	0.869867	0.100128	1.64075e-18	1.89412e-17	23313	KIAA0930	KIAA0930 [Source:HGNC Symbol;Acc:HGNC:1314]
ENSG00000185033	637.615	0.869528	0.139614	2.15878e-10	1.53722e-09	10509	SEMA4B	semaphorin 4B [Source:HGNC Symbol;Acc:HGNC:10730]
ENSG00000167302	414.61	0.869339	0.125746	2.3285e-12	1.9293e-11	146705	TEPSIN	TEPSIN adaptor related protein complex 4 accessory protein [Source:HGNC Symbol;Acc:HGNC:26458]
ENSG00000087884	53.5186	0.869336	0.323272	0.00297578	0.00900107	28971	AAMDC	adipogenesis associated Mth938 domain containing [Source:HGNC Symbol;Acc:HGNC:30205]
ENSG00000080815	474.211	0.869218	0.115425	2.49321e-14	2.33417e-13	5663	PSEN1	presenilin 1 [Source:HGNC Symbol;Acc:HGNC:9508]
ENSG00000197915	37.1199	0.86872	0.410447	0.0136809	0.0356141	388697	HRNR	hornerin [Source:HGNC Symbol;Acc:HGNC:20846]
ENSG00000131669	261.101	0.868655	0.161703	3.83111e-08	2.22747e-07	4814	NINJ1	ninjurin 1 [Source:HGNC Symbol;Acc:HGNC:7824]
ENSG00000174721	41.3533	0.867456	0.365469	0.00741887	0.0206148	143282	FGFBP3	fibroblast growth factor binding protein 3 [Source:HGNC Symbol;Acc:HGNC:23428]
ENSG00000126458	434.644	0.866767	0.119604	2.04621e-13	1.81166e-12	6237	RRAS	RAS related [Source:HGNC Symbol;Acc:HGNC:10447]
ENSG00000167578	345.178	0.866639	0.148717	2.6322e-09	1.71773e-08	53916	RAB4B	RAB4B, member RAS oncogene family [Source:HGNC Symbol;Acc:HGNC:9782]
ENSG00000167992	47.6841	0.866316	0.346504	0.00525439	0.0151136	220001	VWCE	von Willebrand factor C and EGF domains [Source:HGNC Symbol;Acc:HGNC:26487]
ENSG00000171017	190.035	0.866151	0.230399	7.75457e-05	0.000306099	80131	LRRC8E	leucine rich repeat containing 8 VRAC subunit E [Source:HGNC Symbol;Acc:HGNC:26272]
ENSG00000138061	91.7285	0.866097	0.269542	0.000559953	0.00194227	1545	CYP1B1	cytochrome P450 family 1 subfamily B member 1 [Source:HGNC Symbol;Acc:HGNC:2597]
ENSG00000204439	247.415	0.865605	0.156858	1.60118e-08	9.67467e-08	57827	C6orf47	chromosome 6 open reading frame 47 [Source:HGNC Symbol;Acc:HGNC:19076]
ENSG00000256294	54.9479	0.864958	0.328337	0.00359984	0.0107118	7768	ZNF225	zinc finger protein 225 [Source:HGNC Symbol;Acc:HGNC:13018]
ENSG00000196954	314.016	0.864588	0.144876	1.1672e-09	7.83679e-09	837	CASP4	caspase 4 [Source:HGNC Symbol;Acc:HGNC:1505]
ENSG00000152894	518.521	0.863972	0.123102	1.11807e-12	9.44249e-12	5796	PTPRK	protein tyrosine phosphatase receptor type K [Source:HGNC Symbol;Acc:HGNC:9674]
ENSG00000114395	338.68	0.86254	0.13403	5.93108e-11	4.43254e-10	11068	CYB561D2	cytochrome b561 family member D2 [Source:HGNC Symbol;Acc:HGNC:30253]
ENSG00000104325	333.07	0.862009	0.134337	6.64358e-11	4.93693e-10	1666	DECR1	2,4-dienoyl-CoA reductase 1 [Source:HGNC Symbol;Acc:HGNC:2753]
ENSG00000139625	941.444	0.861841	0.0991504	1.69956e-18	1.95998e-17	7786	MAP3K12	mitogen-activated protein kinase kinase kinase 12 [Source:HGNC Symbol;Acc:HGNC:6851]
ENSG00000173559	109.957	0.861601	0.254261	0.000319442	0.00114999	64859	NABP1	nucleic acid binding protein 1 [Source:HGNC Symbol;Acc:HGNC:26232]
ENSG00000254999	1038.23	0.86158	0.0933306	1.35429e-20	1.73167e-19	55845	BRK1	BRICK1 subunit of SCAR/WAVE actin nucleating complex [Source:HGNC Symbol;Acc:HGNC:23057]
ENSG00000276600	274.62	0.86093	0.151105	6.01588e-09	3.77056e-08	338382	RAB7B	RAB7B, member RAS oncogene family [Source:HGNC Symbol;Acc:HGNC:30513]
ENSG00000188321	125.014	0.86069	0.218125	3.60854e-05	0.00014908	84527	ZNF559	zinc finger protein 559 [Source:HGNC Symbol;Acc:HGNC:28197]
ENSG00000157978	563.32	0.860389	0.113803	1.969e-14	1.85741e-13	26119	LDLRAP1	low density lipoprotein receptor adaptor protein 1 [Source:HGNC Symbol;Acc:HGNC:18640]
ENSG00000215440	719.255	0.860221	0.112754	1.13999e-14	1.09292e-13	79716	NPEPL1	aminopeptidase like 1 [Source:HGNC Symbol;Acc:HGNC:16244]
ENSG00000285533	55.583	0.859646	0.313258	0.00271272	0.00826583	105369347	RELA-DT	RELA divergent transcript [Source:HGNC Symbol;Acc:HGNC:54185]
ENSG00000171914	287.652	0.859495	0.163876	6.85012e-08	3.88174e-07	83660	TLN2	talin 2 [Source:HGNC Symbol;Acc:HGNC:15447]
ENSG00000149932	474.62	0.858905	0.115807	5.74584e-14	5.26027e-13	124446	TMEM219	transmembrane protein 219 [Source:HGNC Symbol;Acc:HGNC:25201]
ENSG00000009724	36.457	0.858506	0.412437	0.0152794	0.0392764	10747	MASP2	mannan binding lectin serine peptidase 2 [Source:HGNC Symbol;Acc:HGNC:6902]
ENSG00000187626	46.4399	0.857919	0.347657	0.00587958	0.0167233	387032	ZKSCAN4	zinc finger with KRAB and SCAN domains 4 [Source:HGNC Symbol;Acc:HGNC:13854]
ENSG00000198933	333.728	0.857852	0.152385	8.43854e-09	5.21728e-08	9755	TBKBP1	TBK1 binding protein 1 [Source:HGNC Symbol;Acc:HGNC:30140]
ENSG00000198663	935.471	0.856619	0.106962	5.93341e-16	6.01636e-15	221477	C6orf89	chromosome 6 open reading frame 89 [Source:HGNC Symbol;Acc:HGNC:21114]
ENSG00000127125	339.349	0.855909	0.159716	4.14242e-08	2.40035e-07	79717	PPCS	phosphopantothenoylcysteine synthetase [Source:HGNC Symbol;Acc:HGNC:25686]
ENSG00000175745	221.537	0.855808	0.17008	2.3393e-07	1.25765e-06	7025	NR2F1	nuclear receptor subfamily 2 group F member 1 [Source:HGNC Symbol;Acc:HGNC:7975]
ENSG00000249196	48.2414	0.854931	0.327009	0.00386945	0.0114454	283352	TMEM132D-AS1	TMEM132D antisense RNA 1 [Source:HGNC Symbol;Acc:HGNC:27466]
ENSG00000100926	859.517	0.854909	0.09564	1.90931e-19	2.29921e-18	10548	TM9SF1	transmembrane 9 superfamily member 1 [Source:HGNC Symbol;Acc:HGNC:11864]
ENSG00000048392	505.277	0.854872	0.133144	6.91824e-11	5.1206e-10	50484	RRM2B	ribonucleotide reductase regulatory TP53 inducible subunit M2B [Source:HGNC Symbol;Acc:HGNC:17296]
ENSG00000160602	77.0306	0.854597	0.333386	0.00447805	0.0130588	284086	NEK8	NIMA related kinase 8 [Source:HGNC Symbol;Acc:HGNC:13387]
ENSG00000103254	816.318	0.854205	0.0943188	6.98034e-20	8.6195e-19	65990	ANTKMT	adenine nucleotide translocase lysine methyltransferase [Source:HGNC Symbol;Acc:HGNC:14152]
ENSG00000116514	604.078	0.853942	0.144428	1.63696e-09	1.08635e-08	127544	RNF19B	ring finger protein 19B [Source:HGNC Symbol;Acc:HGNC:26886]
ENSG00000139926	1264.01	0.852854	0.107752	1.22323e-15	1.22807e-14	122786	FRMD6	FERM domain containing 6 [Source:HGNC Symbol;Acc:HGNC:19839]
ENSG00000090989	491.456	0.852432	0.120323	6.89738e-13	5.91e-12	55763	EXOC1	exocyst complex component 1 [Source:HGNC Symbol;Acc:HGNC:30380]
ENSG00000133624	97.0873	0.851345	0.370183	0.00886234	0.0241895	79970	ZNF767P	zinc finger family member 767, pseudogene [Source:HGNC Symbol;Acc:HGNC:21884]
ENSG00000163697	355.836	0.850546	0.137272	2.71952e-10	1.91757e-09	323	APBB2	amyloid beta precursor protein binding family B member 2 [Source:HGNC Symbol;Acc:HGNC:582]
ENSG00000103710	98.8355	0.850076	0.240303	0.000181912	0.000679524	51285	RASL12	RAS like family 12 [Source:HGNC Symbol;Acc:HGNC:30289]
ENSG00000169330	39.2674	0.850061	0.367271	0.00868736	0.0237438	23251	MINAR1	membrane integral NOTCH2 associated receptor 1 [Source:HGNC Symbol;Acc:HGNC:29172]
ENSG00000178149	757.196	0.849285	0.102502	5.81404e-17	6.20813e-16	55152	DALRD3	DALR anticodon binding domain containing 3 [Source:HGNC Symbol;Acc:HGNC:25536]
ENSG00000128590	193.638	0.849073	0.276544	0.000946824	0.00316477	4189	DNAJB9	DnaJ heat shock protein family (Hsp40) member B9 [Source:HGNC Symbol;Acc:HGNC:6968]
ENSG00000054282	363.797	0.848917	0.171647	3.53482e-07	1.86272e-06	10806	SDCCAG8	SHH signaling and ciliogenesis regulator SDCCAG8 [Source:HGNC Symbol;Acc:HGNC:10671]
ENSG00000119242	220.345	0.84834	0.161138	7.05005e-08	3.98593e-07	80212	CCDC92	coiled-coil domain containing 92 [Source:HGNC Symbol;Acc:HGNC:29563]
ENSG00000181315	154.911	0.847712	0.240522	0.000201802	0.000748814	79692	ZNF322	zinc finger protein 322 [Source:HGNC Symbol;Acc:HGNC:23640]
ENSG00000140939	286.18	0.847107	0.149011	6.19481e-09	3.87727e-08	8996	NOL3	nucleolar protein 3 [Source:HGNC Symbol;Acc:HGNC:7869]
ENSG00000104805	4134.14	0.846786	0.060976	3.65925e-44	1.00542e-42	4924	NUCB1	nucleobindin 1 [Source:HGNC Symbol;Acc:HGNC:8043]
ENSG00000163754	588.105	0.846543	0.107993	2.15697e-15	2.14195e-14	2992	GYG1	glycogenin 1 [Source:HGNC Symbol;Acc:HGNC:4699]
ENSG00000178385	222.563	0.84586	0.162125	8.98562e-08	5.0306e-07	389072	PLEKHM3	pleckstrin homology domain containing M3 [Source:HGNC Symbol;Acc:HGNC:34006]
ENSG00000106404	203.444	0.84439	0.167133	2.19217e-07	1.18196e-06	24146	CLDN15	claudin 15 [Source:HGNC Symbol;Acc:HGNC:2036]
ENSG00000158560	54.1294	0.842855	0.327608	0.00465051	0.0135208	1780	DYNC1I1	dynein cytoplasmic 1 intermediate chain 1 [Source:HGNC Symbol;Acc:HGNC:2963]
ENSG00000072778	7203.57	0.842304	0.0548669	1.70545e-53	5.78095e-52	37	ACADVL	acyl-CoA dehydrogenase very long chain [Source:HGNC Symbol;Acc:HGNC:92]
ENSG00000258643	112.731	0.842008	0.335214	0.00525796	0.015122	100529063	BCL2L2-PABPN1	BCL2L2-PABPN1 readthrough [Source:HGNC Symbol;Acc:HGNC:42959]
ENSG00000071537	896.491	0.842007	0.119199	8.01051e-13	6.82192e-12	6400	SEL1L	SEL1L adaptor subunit of ERAD E3 ubiquitin ligase [Source:HGNC Symbol;Acc:HGNC:10717]
ENSG00000158109	441.521	0.841726	0.125335	9.0588e-12	7.20639e-11	127262	TPRG1L	tumor protein p63 regulated 1 like [Source:HGNC Symbol;Acc:HGNC:27007]
ENSG00000151176	961.763	0.840803	0.091701	2.42596e-20	3.06337e-19	196463	PLBD2	phospholipase B domain containing 2 [Source:HGNC Symbol;Acc:HGNC:27283]
ENSG00000095066	307.267	0.840188	0.146999	5.44109e-09	3.42761e-08	29911	HOOK2	hook microtubule tethering protein 2 [Source:HGNC Symbol;Acc:HGNC:19885]
ENSG00000117305	215.828	0.840034	0.168549	3.16751e-07	1.67747e-06	3155	HMGCL	3-hydroxy-3-methylglutaryl-CoA lyase [Source:HGNC Symbol;Acc:HGNC:5005]
ENSG00000159214	102.915	0.839775	0.234913	0.00016823	0.000632327	149473	CCDC24	coiled-coil domain containing 24 [Source:HGNC Symbol;Acc:HGNC:28688]
ENSG00000185189	325.777	0.839268	0.150711	1.30232e-08	7.93976e-08	340371	NRBP2	nuclear receptor binding protein 2 [Source:HGNC Symbol;Acc:HGNC:19339]
ENSG00000100360	86.1569	0.837557	0.251736	0.000410203	0.00145101	11020	IFT27	intraflagellar transport 27 [Source:HGNC Symbol;Acc:HGNC:18626]
ENSG00000169193	95.0583	0.83753	0.239433	0.000222073	0.000818973	90693	CCDC126	coiled-coil domain containing 126 [Source:HGNC Symbol;Acc:HGNC:22398]
ENSG00000171443	107.677	0.837466	0.226214	9.9542e-05	0.000386708	147807	ZNF524	zinc finger protein 524 [Source:HGNC Symbol;Acc:HGNC:28322]
ENSG00000247572	113.714	0.837455	0.23312	0.000156948	0.000593415	100131067	CKMT2-AS1	CKMT2 antisense RNA 1 [Source:HGNC Symbol;Acc:HGNC:48997]
ENSG00000130517	782.918	0.836523	0.143867	2.84511e-09	1.85127e-08	54858	PGPEP1	pyroglutamyl-peptidase I [Source:HGNC Symbol;Acc:HGNC:13568]
ENSG00000178537	245.769	0.836475	0.162135	1.24302e-07	6.84578e-07	788	SLC25A20	solute carrier family 25 member 20 [Source:HGNC Symbol;Acc:HGNC:1421]
ENSG00000159658	990.823	0.836412	0.0896332	4.96987e-21	6.50364e-20	9813	EFCAB14	EF-hand calcium binding domain 14 [Source:HGNC Symbol;Acc:HGNC:29051]
ENSG00000103145	990.283	0.835674	0.0907669	1.63521e-20	2.07896e-19	54985	HCFC1R1	host cell factor C1 regulator 1 [Source:HGNC Symbol;Acc:HGNC:21198]
ENSG00000105855	1557.58	0.835671	0.0901462	9.79865e-21	1.26157e-19	3696	ITGB8	integrin subunit beta 8 [Source:HGNC Symbol;Acc:HGNC:6163]
ENSG00000134343	48.4576	0.833844	0.35478	0.00840911	0.0230595	63982	ANO3	anoctamin 3 [Source:HGNC Symbol;Acc:HGNC:14004]
ENSG00000024862	184.437	0.833581	0.181434	2.12497e-06	1.02433e-05	25901	CCDC28A	coiled-coil domain containing 28A [Source:HGNC Symbol;Acc:HGNC:21098]
ENSG00000164048	213.046	0.833568	0.167164	3.09777e-07	1.64366e-06	51385	ZNF589	zinc finger protein 589 [Source:HGNC Symbol;Acc:HGNC:16747]
ENSG00000104369	293.846	0.833241	0.16818	3.58966e-07	1.89118e-06	56704	JPH1	junctophilin 1 [Source:HGNC Symbol;Acc:HGNC:14201]
ENSG00000132386	291.279	0.832128	0.143921	3.75681e-09	2.41287e-08	5176	SERPINF1	serpin family F member 1 [Source:HGNC Symbol;Acc:HGNC:8824]
ENSG00000172382	40.2243	0.831518	0.381811	0.0123206	0.0324971	83886	PRSS27	serine protease 27 [Source:HGNC Symbol;Acc:HGNC:15475]
ENSG00000198162	1053.5	0.830988	0.141683	3.26618e-09	2.11294e-08	10905	MAN1A2	mannosidase alpha class 1A member 2 [Source:HGNC Symbol;Acc:HGNC:6822]
ENSG00000248671	44.9727	0.830884	0.336716	0.00607412	0.0172114	285407	ALG1L9P	ALG1 like 9, pseudogene [Source:NCBI gene (formerly Entrezgene);Acc:285407]
ENSG00000165983	158.967	0.830434	0.185697	3.79241e-06	1.77674e-05	9317	PTER	phosphotriesterase related [Source:HGNC Symbol;Acc:HGNC:9590]
ENSG00000178860	173.33	0.830332	0.191594	7.23146e-06	3.27859e-05	9242	MSC	musculin [Source:HGNC Symbol;Acc:HGNC:7321]
ENSG00000140945	1258.25	0.829901	0.0851965	1.08634e-22	1.53781e-21	1012	CDH13	cadherin 13 [Source:HGNC Symbol;Acc:HGNC:1753]
ENSG00000262664	617.808	0.829648	0.1185	1.32479e-12	1.1142e-11	124641	OVCA2	OVCA2 serine hydrolase domain containing [Source:HGNC Symbol;Acc:HGNC:24203]
ENSG00000164300	195.525	0.829573	0.173142	8.31239e-07	4.19242e-06	256987	SERINC5	serine incorporator 5 [Source:HGNC Symbol;Acc:HGNC:18825]
ENSG00000257621	355.017	0.829168	0.142804	3.21253e-09	2.08004e-08	379025	PSMA3-AS1	PSMA3 antisense RNA 1 [Source:HGNC Symbol;Acc:HGNC:26445]
ENSG00000099957	72.4536	0.828836	0.297142	0.00237555	0.00733449	9127	P2RX6	purinergic receptor P2X 6 [Source:HGNC Symbol;Acc:HGNC:8538]
ENSG00000155957	604.837	0.828761	0.16028	1.10477e-07	6.10848e-07	51643	TMBIM4	transmembrane BAX inhibitor motif containing 4 [Source:HGNC Symbol;Acc:HGNC:24257]
ENSG00000110455	264.72	0.82768	0.209641	3.64657e-05	0.000150568	84680	ACCS	1-aminocyclopropane-1-carboxylate synthase homolog (inactive) [Source:HGNC Symbol;Acc:HGNC:23989]
ENSG00000116711	94.6611	0.827624	0.242397	0.000313733	0.00113035	5321	PLA2G4A	phospholipase A2 group IVA [Source:HGNC Symbol;Acc:HGNC:9035]
ENSG00000110171	164.941	0.827618	0.201768	1.96927e-05	8.4449e-05	10612	TRIM3	tripartite motif containing 3 [Source:HGNC Symbol;Acc:HGNC:10064]
ENSG00000176809	58.9391	0.827545	0.314842	0.00391427	0.0115657	374819	LRRC37A3	leucine rich repeat containing 37 member A3 [Source:HGNC Symbol;Acc:HGNC:32427]
ENSG00000165410	444.643	0.827293	0.119042	1.81724e-12	1.51638e-11	1073	CFL2	cofilin 2 [Source:HGNC Symbol;Acc:HGNC:1875]
ENSG00000107521	911.586	0.827274	0.0874826	1.57934e-21	2.12015e-20	3257	HPS1	HPS1 biogenesis of lysosomal organelles complex 3 subunit 1 [Source:HGNC Symbol;Acc:HGNC:5163]
ENSG00000135677	1733.03	0.82638	0.0721713	1.2462e-30	2.38133e-29	2799	GNS	glucosamine (N-acetyl)-6-sulfatase [Source:HGNC Symbol;Acc:HGNC:4422]
ENSG00000102158	725.722	0.826018	0.110609	4.25857e-14	3.93091e-13	84061	MAGT1	magnesium transporter 1 [Source:HGNC Symbol;Acc:HGNC:28880]
ENSG00000186088	77.8601	0.825712	0.275538	0.00127809	0.00417702	54103	GSAP	gamma-secretase activating protein [Source:HGNC Symbol;Acc:HGNC:28042]
ENSG00000070540	345.458	0.825573	0.14114	2.42041e-09	1.58555e-08	55062	WIPI1	WD repeat domain, phosphoinositide interacting 1 [Source:HGNC Symbol;Acc:HGNC:25471]
ENSG00000119514	64.3107	0.82535	0.286864	0.0019023	0.00600617	79695	GALNT12	polypeptide N-acetylgalactosaminyltransferase 12 [Source:HGNC Symbol;Acc:HGNC:19877]
ENSG00000266714	140.233	0.824833	0.264755	0.000801324	0.00271171	80022	MYO15B	myosin XVB [Source:HGNC Symbol;Acc:HGNC:14083]
ENSG00000163590	77.1204	0.824764	0.311164	0.00363903	0.010814	151742	PPM1L	protein phosphatase, Mg2+/Mn2+ dependent 1L [Source:HGNC Symbol;Acc:HGNC:16381]
ENSG00000060971	502.415	0.824552	0.111994	9.54918e-14	8.63252e-13	30	ACAA1	acetyl-CoA acyltransferase 1 [Source:HGNC Symbol;Acc:HGNC:82]
ENSG00000161835	170.37	0.824463	0.184014	3.54207e-06	1.66224e-05	160622	TAMALIN	trafficking regulator and scaffold protein tamalin [Source:HGNC Symbol;Acc:HGNC:18707]
ENSG00000213398	63.4213	0.824274	0.306234	0.00327126	0.00982169	3931	LCAT	lecithin-cholesterol acyltransferase [Source:HGNC Symbol;Acc:HGNC:6522]
ENSG00000019549	126.575	0.822802	0.293835	0.00232973	0.00720995	6591	SNAI2	snail family transcriptional repressor 2 [Source:HGNC Symbol;Acc:HGNC:11094]
ENSG00000179833	1060.83	0.822355	0.112276	1.2125e-13	1.08599e-12	9792	SERTAD2	SERTA domain containing 2 [Source:HGNC Symbol;Acc:HGNC:30784]
ENSG00000130649	89.8633	0.821841	0.253999	0.000575211	0.0019921	1571	CYP2E1	cytochrome P450 family 2 subfamily E member 1 [Source:HGNC Symbol;Acc:HGNC:2631]
ENSG00000163870	546.621	0.821372	0.121151	6.00546e-12	4.83597e-11	131601	TPRA1	transmembrane protein adipocyte associated 1 [Source:HGNC Symbol;Acc:HGNC:30413]
ENSG00000082438	117.337	0.821231	0.217941	8.00349e-05	0.000315591	22837	COBLL1	cordon-bleu WH2 repeat protein like 1 [Source:HGNC Symbol;Acc:HGNC:23571]
ENSG00000186594	194.789	0.821087	0.219508	8.90465e-05	0.000348235	84981	MIR22HG	MIR22 host gene [Source:HGNC Symbol;Acc:HGNC:28219]
ENSG00000080561	51.1588	0.819904	0.401958	0.0166865	0.042415	11043	MID2	midline 2 [Source:HGNC Symbol;Acc:HGNC:7096]
ENSG00000109572	1055.32	0.818587	0.0906239	8.86328e-20	1.08687e-18	1182	CLCN3	chloride voltage-gated channel 3 [Source:HGNC Symbol;Acc:HGNC:2021]
ENSG00000206149	313.487	0.818529	0.150389	2.8042e-08	1.65365e-07	440248	HERC2P9	hect domain and RLD 2 pseudogene 9 [Source:HGNC Symbol;Acc:HGNC:30495]
ENSG00000013441	281.532	0.818467	0.218614	8.71167e-05	0.000341286	1195	CLK1	CDC like kinase 1 [Source:HGNC Symbol;Acc:HGNC:2068]
ENSG00000119673	284.824	0.818467	0.14116	3.41923e-09	2.20748e-08	10965	ACOT2	acyl-CoA thioesterase 2 [Source:HGNC Symbol;Acc:HGNC:18431]
ENSG00000213366	114.114	0.818127	0.250196	0.000532477	0.00185243	2946	GSTM2	glutathione S-transferase mu 2 [Source:HGNC Symbol;Acc:HGNC:4634]
ENSG00000196456	114.935	0.817357	0.23793	0.000288055	0.00104427	285971	ZNF775	zinc finger protein 775 [Source:HGNC Symbol;Acc:HGNC:28501]
ENSG00000285967	278.929	0.8173	0.144775	8.43275e-09	5.21514e-08	646719	NIPBL-DT	NIPBL divergent transcript [Source:HGNC Symbol;Acc:HGNC:51293]
ENSG00000185339	94.6701	0.817158	0.251741	0.000583662	0.00201856	6948	TCN2	transcobalamin 2 [Source:HGNC Symbol;Acc:HGNC:11653]
ENSG00000113161	1507.71	0.817092	0.12295	1.5461e-11	1.20674e-10	3156	HMGCR	3-hydroxy-3-methylglutaryl-CoA reductase [Source:HGNC Symbol;Acc:HGNC:5006]
ENSG00000121410	142	0.816927	0.20369	3.09995e-05	0.000129312	1	A1BG	alpha-1-B glycoprotein [Source:HGNC Symbol;Acc:HGNC:5]
ENSG00000196428	776.803	0.81513	0.12995	1.90525e-10	1.36409e-09	9819	TSC22D2	TSC22 domain family member 2 [Source:HGNC Symbol;Acc:HGNC:29095]
ENSG00000174165	481.719	0.814133	0.113206	3.31226e-13	2.89246e-12	254359	ZDHHC24	zinc finger DHHC-type containing 24 [Source:HGNC Symbol;Acc:HGNC:27387]
ENSG00000173209	586.181	0.81405	0.124993	3.96556e-11	2.99772e-10	130872	AHSA2P	activator of HSP90 ATPase homolog 2, pseudogene [Source:HGNC Symbol;Acc:HGNC:20437]
ENSG00000171044	60.79	0.813659	0.314024	0.00430903	0.0126121	286046	XKR6	XK related 6 [Source:HGNC Symbol;Acc:HGNC:27806]
ENSG00000141504	362.894	0.813654	0.13301	5.0366e-10	3.46711e-09	112483	SAT2	spermidine/spermine N1-acetyltransferase family member 2 [Source:HGNC Symbol;Acc:HGNC:23160]
ENSG00000102870	516.75	0.8126	0.138052	2.07032e-09	1.3614e-08	23361	ZNF629	zinc finger protein 629 [Source:HGNC Symbol;Acc:HGNC:29008]
ENSG00000164050	1252.41	0.812475	0.129885	1.97546e-10	1.41074e-09	5364	PLXNB1	plexin B1 [Source:HGNC Symbol;Acc:HGNC:9103]
ENSG00000161671	799.152	0.812204	0.093245	1.6327e-18	1.8858e-17	284361	EMC10	ER membrane protein complex subunit 10 [Source:HGNC Symbol;Acc:HGNC:27609]
ENSG00000164751	299.487	0.812186	0.141049	4.39588e-09	2.80638e-08	5828	PEX2	peroxisomal biogenesis factor 2 [Source:HGNC Symbol;Acc:HGNC:9717]
ENSG00000283154	427.221	0.812081	0.15542	9.07487e-08	5.07929e-07	100505385	IQCJ-SCHIP1	IQCJ-SCHIP1 readthrough [Source:HGNC Symbol;Acc:HGNC:38842]
ENSG00000180425	126.988	0.811163	0.25002	0.000582713	0.0020159	54494	C11orf71	chromosome 11 open reading frame 71 [Source:HGNC Symbol;Acc:HGNC:25937]
ENSG00000159388	143.073	0.810026	0.206008	4.25313e-05	0.000173623	7832	BTG2	BTG anti-proliferation factor 2 [Source:HGNC Symbol;Acc:HGNC:1131]
ENSG00000103253	849.547	0.809702	0.108964	5.61547e-14	5.14936e-13	84264	HAGHL	hydroxyacylglutathione hydrolase like [Source:HGNC Symbol;Acc:HGNC:14177]
ENSG00000116001	610.027	0.809503	0.146424	1.67495e-08	1.00985e-07	7072	TIA1	TIA1 cytotoxic granule associated RNA binding protein [Source:HGNC Symbol;Acc:HGNC:11802]
ENSG00000239282	46.5362	0.809417	0.404758	0.0193283	0.0484139	652968	CASTOR1	cytosolic arginine sensor for mTORC1 subunit 1 [Source:HGNC Symbol;Acc:HGNC:34423]
ENSG00000175265	1828.66	0.808768	0.106797	1.90887e-14	1.80222e-13	23015	GOLGA8A	golgin A8 family member A [Source:HGNC Symbol;Acc:HGNC:31972]
ENSG00000055609	1535.04	0.808175	0.11027	1.2223e-13	1.09346e-12	58508	KMT2C	lysine methyltransferase 2C [Source:HGNC Symbol;Acc:HGNC:13726]
ENSG00000115459	129.039	0.808014	0.23554	0.000278752	0.00101331	84173	ELMOD3	ELMO domain containing 3 [Source:HGNC Symbol;Acc:HGNC:26158]
ENSG00000126561	473.655	0.807743	0.128345	1.65862e-10	1.19209e-09	6776	STAT5A	signal transducer and activator of transcription 5A [Source:HGNC Symbol;Acc:HGNC:11366]
ENSG00000121680	529.475	0.807701	0.123019	2.77194e-11	2.12199e-10	9409	PEX16	peroxisomal biogenesis factor 16 [Source:HGNC Symbol;Acc:HGNC:8857]
ENSG00000040633	901.182	0.807124	0.135024	1.14433e-09	7.69018e-09	79142	PHF23	PHD finger protein 23 [Source:HGNC Symbol;Acc:HGNC:28428]
ENSG00000103042	314.505	0.806441	0.170041	1.07401e-06	5.36235e-06	55238	SLC38A7	solute carrier family 38 member 7 [Source:HGNC Symbol;Acc:HGNC:25582]
ENSG00000109270	250.955	0.805459	0.160119	2.41334e-07	1.29465e-06	8649	LAMTOR3	late endosomal/lysosomal adaptor, MAPK and MTOR activator 3 [Source:HGNC Symbol;Acc:HGNC:15606]
ENSG00000263069	42.0575	0.804527	0.396758	0.0183768	0.0462379	100294362	RNF213-AS1	RNF213 antisense RNA 1 [Source:HGNC Symbol;Acc:HGNC:54402]
ENSG00000099999	295.007	0.804376	0.142456	8.64917e-09	5.34306e-08	200312	RNF215	ring finger protein 215 [Source:HGNC Symbol;Acc:HGNC:33434]
ENSG00000150977	367.365	0.803673	0.136454	1.97816e-09	1.30387e-08	196383	RILPL2	Rab interacting lysosomal protein like 2 [Source:HGNC Symbol;Acc:HGNC:28787]
ENSG00000003249	638.953	0.803213	0.104253	6.9866e-15	6.77079e-14	79007	DBNDD1	dysbindin domain containing 1 [Source:HGNC Symbol;Acc:HGNC:28455]
ENSG00000233621	45.7012	0.802758	0.345208	0.00935353	0.0253844	728431	LINC01137	long intergenic non-protein coding RNA 1137 [Source:HGNC Symbol;Acc:HGNC:49453]
ENSG00000126581	1025.32	0.801956	0.0881538	5.16526e-20	6.42436e-19	8678	BECN1	beclin 1 [Source:HGNC Symbol;Acc:HGNC:1034]
ENSG00000171603	4002.49	0.801598	0.063113	3.23407e-37	7.51746e-36	22883	CLSTN1	calsyntenin 1 [Source:HGNC Symbol;Acc:HGNC:17447]
ENSG00000164168	332.686	0.801509	0.161207	3.20037e-07	1.69287e-06	55751	TMEM184C	transmembrane protein 184C [Source:HGNC Symbol;Acc:HGNC:25587]
ENSG00000197324	1860.56	0.801384	0.0743118	2.24815e-27	3.81025e-26	26020	LRP10	LDL receptor related protein 10 [Source:HGNC Symbol;Acc:HGNC:14553]
ENSG00000171222	1507.88	0.800318	0.0850916	2.86574e-21	3.80361e-20	51282	SCAND1	SCAN domain containing 1 [Source:HGNC Symbol;Acc:HGNC:10566]
ENSG00000136888	687.403	0.799655	0.0977501	1.50176e-16	1.56248e-15	9550	ATP6V1G1	ATPase H+ transporting V1 subunit G1 [Source:HGNC Symbol;Acc:HGNC:864]
ENSG00000167074	166.781	0.799034	0.184277	7.47168e-06	3.38133e-05	7008	TEF	TEF transcription factor, PAR bZIP family member [Source:HGNC Symbol;Acc:HGNC:11722]
ENSG00000187954	781.98	0.798847	0.106344	3.1234e-14	2.9071e-13	50626	CYHR1	cysteine and histidine rich 1 [Source:HGNC Symbol;Acc:HGNC:17806]
ENSG00000133619	289.578	0.798428	0.17033	1.42458e-06	7.01084e-06	84626	KRBA1	KRAB-A domain containing 1 [Source:HGNC Symbol;Acc:HGNC:22228]
ENSG00000181433	198.332	0.798226	0.167277	9.78709e-07	4.90959e-06	55511	SAGE1	sarcoma antigen 1 [Source:HGNC Symbol;Acc:HGNC:30369]
ENSG00000069702	79.3838	0.796787	0.260189	0.00112032	0.00370148	7049	TGFBR3	transforming growth factor beta receptor 3 [Source:HGNC Symbol;Acc:HGNC:11774]
ENSG00000181218	213.246	0.796773	0.168299	1.15389e-06	5.74704e-06	92815	H2AW	H2A.W histone [Source:HGNC Symbol;Acc:HGNC:20507]
ENSG00000174227	710.326	0.795987	0.106187	3.38773e-14	3.14657e-13	54872	PIGG	phosphatidylinositol glycan anchor biosynthesis class G [Source:HGNC Symbol;Acc:HGNC:25985]
ENSG00000143013	490.366	0.795556	0.132774	1.0754e-09	7.24438e-09	8543	LMO4	LIM domain only 4 [Source:HGNC Symbol;Acc:HGNC:6644]
ENSG00000154153	261.952	0.794826	0.154514	1.45429e-07	7.96026e-07	54463	RETREG1	reticulophagy regulator 1 [Source:HGNC Symbol;Acc:HGNC:25964]
ENSG00000136490	453.95	0.794554	0.123503	6.69619e-11	4.97272e-10	80774	LIMD2	LIM domain containing 2 [Source:HGNC Symbol;Acc:HGNC:28142]
ENSG00000124006	3288.26	0.793819	0.0613559	1.43629e-38	3.4798e-37	23363	OBSL1	obscurin like cytoskeletal adaptor 1 [Source:HGNC Symbol;Acc:HGNC:29092]
ENSG00000091947	477.316	0.793615	0.115232	3.07312e-12	2.52829e-11	84336	TMEM101	transmembrane protein 101 [Source:HGNC Symbol;Acc:HGNC:28653]
ENSG00000204963	210.432	0.793494	0.16639	9.55862e-07	4.79821e-06	56141	PCDHA7	protocadherin alpha 7 [Source:HGNC Symbol;Acc:HGNC:8673]
ENSG00000251201	61.535	0.792814	0.301811	0.0041818	0.0122718	100302736	TMED7-TICAM2	TMED7-TICAM2 readthrough [Source:HGNC Symbol;Acc:HGNC:33945]
ENSG00000074621	273.927	0.792611	0.154278	1.5128e-07	8.27242e-07	9187	SLC24A1	solute carrier family 24 member 1 [Source:HGNC Symbol;Acc:HGNC:10975]
ENSG00000138111	151.789	0.791959	0.238781	0.000446577	0.00157221	79847	MFSD13A	major facilitator superfamily domain containing 13A [Source:HGNC Symbol;Acc:HGNC:26196]
ENSG00000132205	353.791	0.791139	0.142752	1.63391e-08	9.86706e-08	84034	EMILIN2	elastin microfibril interfacer 2 [Source:HGNC Symbol;Acc:HGNC:19881]
ENSG00000118961	204.114	0.790841	0.189478	1.50084e-05	6.53395e-05	60526	LDAH	lipid droplet associated hydrolase [Source:HGNC Symbol;Acc:HGNC:26145]
ENSG00000115170	266.789	0.790838	0.154256	1.53496e-07	8.3854e-07	90	ACVR1	activin A receptor type 1 [Source:HGNC Symbol;Acc:HGNC:171]
ENSG00000204525	3268.5	0.790637	0.0754688	5.97365e-26	9.56554e-25	3107	HLA-C	major histocompatibility complex, class I, C [Source:HGNC Symbol;Acc:HGNC:4933]
ENSG00000137628	76.0548	0.790303	0.271213	0.00178996	0.00568038	55601	DDX60	DExD/H-box helicase 60 [Source:HGNC Symbol;Acc:HGNC:25942]
ENSG00000108771	103.92	0.78982	0.24561	0.000653881	0.00224127	79132	DHX58	DExH-box helicase 58 [Source:HGNC Symbol;Acc:HGNC:29517]
ENSG00000005206	1024.98	0.789423	0.0992902	9.36913e-16	9.44865e-15	56928	SPPL2B	signal peptide peptidase like 2B [Source:HGNC Symbol;Acc:HGNC:30627]
ENSG00000267254	72.9652	0.789227	0.273536	0.00193196	0.00609379	284408	ZNF790-AS1	ZNF790 antisense RNA 1 [Source:HGNC Symbol;Acc:HGNC:27617]
ENSG00000215039	180.32	0.789077	0.224042	0.000219626	0.000811044	678655	CD27-AS1	CD27 antisense RNA 1 [Source:HGNC Symbol;Acc:HGNC:43896]
ENSG00000267080	116.167	0.7884	0.247396	0.000739146	0.00251195	339201	ASB16-AS1	ASB16 antisense RNA 1 [Source:HGNC Symbol;Acc:HGNC:25442]
ENSG00000140396	463.103	0.787877	0.175367	3.52915e-06	1.65687e-05	10499	NCOA2	nuclear receptor coactivator 2 [Source:HGNC Symbol;Acc:HGNC:7669]
ENSG00000145687	240.747	0.787854	0.156911	2.71565e-07	1.45125e-06	23635	SSBP2	single stranded DNA binding protein 2 [Source:HGNC Symbol;Acc:HGNC:15831]
ENSG00000180447	182.992	0.787794	0.173978	3.09337e-06	1.46088e-05	2619	GAS1	growth arrest specific 1 [Source:HGNC Symbol;Acc:HGNC:4165]
ENSG00000074527	231.1	0.787576	0.163784	8.29853e-07	4.18637e-06	59277	NTN4	netrin 4 [Source:HGNC Symbol;Acc:HGNC:13658]
ENSG00000130363	183.607	0.787343	0.190874	2.01259e-05	8.6224e-05	83861	RSPH3	radial spoke head 3 [Source:HGNC Symbol;Acc:HGNC:21054]
ENSG00000181004	42.4266	0.787244	0.381999	0.0184148	0.0463075	166379	BBS12	Bardet-Biedl syndrome 12 [Source:HGNC Symbol;Acc:HGNC:26648]
ENSG00000118518	170.635	0.786832	0.208905	8.24789e-05	0.000324369	81847	RNF146	ring finger protein 146 [Source:HGNC Symbol;Acc:HGNC:21336]
ENSG00000182551	1072.47	0.786758	0.0860931	3.40491e-20	4.28259e-19	55256	ADI1	acireductone dioxygenase 1 [Source:HGNC Symbol;Acc:HGNC:30576]
ENSG00000153814	103.669	0.786281	0.23113	0.000350867	0.00125483	221895	JAZF1	JAZF zinc finger 1 [Source:HGNC Symbol;Acc:HGNC:28917]
ENSG00000140941	1113.75	0.786206	0.0955992	1.0176e-16	1.0702e-15	81631	MAP1LC3B	microtubule associated protein 1 light chain 3 beta [Source:HGNC Symbol;Acc:HGNC:13352]
ENSG00000212747	282.964	0.78604	0.145716	3.8227e-08	2.22373e-07	441518	RTL8B	retrotransposon Gag like 8B [Source:HGNC Symbol;Acc:HGNC:33156]
ENSG00000106460	539.828	0.785977	0.204512	6.17501e-05	0.000246309	54664	TMEM106B	transmembrane protein 106B [Source:HGNC Symbol;Acc:HGNC:22407]
ENSG00000204969	74.6565	0.785954	0.274244	0.00208102	0.00651152	56146	PCDHA2	protocadherin alpha 2 [Source:HGNC Symbol;Acc:HGNC:8668]
ENSG00000061987	654.965	0.785729	0.101947	6.98206e-15	6.76932e-14	23041	MON2	MON2 homolog, regulator of endosome-to-Golgi trafficking [Source:HGNC Symbol;Acc:HGNC:29177]
ENSG00000108797	922.453	0.785026	0.101134	4.67267e-15	4.56198e-14	8506	CNTNAP1	contactin associated protein 1 [Source:HGNC Symbol;Acc:HGNC:8011]
ENSG00000106992	678.366	0.784484	0.122818	9.4817e-11	6.94206e-10	203	AK1	adenylate kinase 1 [Source:HGNC Symbol;Acc:HGNC:361]
ENSG00000130283	558.915	0.784129	0.104716	3.71678e-14	3.44361e-13	2657	GDF1	growth differentiation factor 1 [Source:HGNC Symbol;Acc:HGNC:4214]
ENSG00000124208	464.899	0.783951	0.168335	1.67242e-06	8.16759e-06	387522	PEDS1-UBE2V1	PEDS1-UBE2V1 readthrough [Source:HGNC Symbol;Acc:HGNC:33521]
ENSG00000173264	867.8	0.783656	0.109158	3.92861e-13	3.42134e-12	56834	GPR137	G protein-coupled receptor 137 [Source:HGNC Symbol;Acc:HGNC:24300]
ENSG00000153956	216.638	0.783342	0.18282	9.47459e-06	4.23371e-05	781	CACNA2D1	calcium voltage-gated channel auxiliary subunit alpha2delta 1 [Source:HGNC Symbol;Acc:HGNC:1399]
ENSG00000196458	230.392	0.782797	0.195602	3.15802e-05	0.000131563	100289635	ZNF605	zinc finger protein 605 [Source:HGNC Symbol;Acc:HGNC:28068]
ENSG00000235531	70.9639	0.781441	0.29114	0.0034545	0.0103164	100132891	MSC-AS1	MSC antisense RNA 1 [Source:HGNC Symbol;Acc:HGNC:48724]
ENSG00000161048	135.42	0.781414	0.240201	0.000570306	0.00197651	222236	NAPEPLD	N-acyl phosphatidylethanolamine phospholipase D [Source:HGNC Symbol;Acc:HGNC:21683]
ENSG00000170899	134.626	0.780875	0.202168	5.73704e-05	0.000230038	2941	GSTA4	glutathione S-transferase alpha 4 [Source:HGNC Symbol;Acc:HGNC:4629]
ENSG00000198482	50.4053	0.780639	0.324058	0.00763424	0.021158	388558	ZNF808	zinc finger protein 808 [Source:HGNC Symbol;Acc:HGNC:33230]
ENSG00000198718	176.582	0.780266	0.267626	0.00171156	0.0054486	23116	TOGARAM1	TOG array regulator of axonemal microtubules 1 [Source:HGNC Symbol;Acc:HGNC:19959]
ENSG00000158828	649.58	0.780248	0.0999773	3.26907e-15	3.21977e-14	65018	PINK1	PTEN induced kinase 1 [Source:HGNC Symbol;Acc:HGNC:14581]
ENSG00000140545	782.602	0.779751	0.103581	2.82394e-14	2.63167e-13	4240	MFGE8	milk fat globule EGF and factor V/VIII domain containing [Source:HGNC Symbol;Acc:HGNC:7036]
ENSG00000149541	1288.97	0.779704	0.0815356	6.2015e-22	8.50916e-21	26229	B3GAT3	beta-1,3-glucuronyltransferase 3 [Source:HGNC Symbol;Acc:HGNC:923]
ENSG00000267368	241.49	0.779374	0.161243	7.06759e-07	3.60612e-06	100134938	UPK3BL1	uroplakin 3B like 1 [Source:HGNC Symbol;Acc:HGNC:37278]
ENSG00000100151	343.083	0.77928	0.139923	1.38553e-08	8.41944e-08	9463	PICK1	protein interacting with PRKCA 1 [Source:HGNC Symbol;Acc:HGNC:9394]
ENSG00000152217	99.6435	0.779247	0.254044	0.00108202	0.00358235	26040	SETBP1	SET binding protein 1 [Source:HGNC Symbol;Acc:HGNC:15573]
ENSG00000065600	272.464	0.778349	0.156841	3.78603e-07	1.98947e-06	55248	PACC1	proton activated chloride channel 1 [Source:HGNC Symbol;Acc:HGNC:25593]
ENSG00000278535	477.331	0.777072	0.135189	4.69519e-09	2.98382e-08	79154	DHRS11	dehydrogenase/reductase 11 [Source:HGNC Symbol;Acc:HGNC:28639]
ENSG00000104497	107.791	0.776893	0.242053	0.000675019	0.00230877	64089	SNX16	sorting nexin 16 [Source:HGNC Symbol;Acc:HGNC:14980]
ENSG00000103152	1759.73	0.776586	0.0950341	1.74668e-16	1.81224e-15	4350	MPG	N-methylpurine DNA glycosylase [Source:HGNC Symbol;Acc:HGNC:7211]
ENSG00000251664	58.0055	0.776556	0.307878	0.00589566	0.0167639	56137	PCDHA12	protocadherin alpha 12 [Source:HGNC Symbol;Acc:HGNC:8666]
ENSG00000196743	313.095	0.776546	0.145861	5.75845e-08	3.29151e-07	2760	GM2A	GM2 ganglioside activator [Source:HGNC Symbol;Acc:HGNC:4367]
ENSG00000135722	152.273	0.775585	0.200605	5.9756e-05	0.000239045	55336	FBXL8	F-box and leucine rich repeat protein 8 [Source:HGNC Symbol;Acc:HGNC:17875]
ENSG00000128699	240.918	0.774199	0.185992	1.62589e-05	7.04952e-05	94101	ORMDL1	ORMDL sphingolipid biosynthesis regulator 1 [Source:HGNC Symbol;Acc:HGNC:16036]
ENSG00000011132	196.437	0.774091	0.217114	0.000180559	0.000675035	9546	APBA3	amyloid beta precursor protein binding family A member 3 [Source:HGNC Symbol;Acc:HGNC:580]
ENSG00000134575	612.895	0.773458	0.13786	1.03328e-08	6.34628e-08	53	ACP2	acid phosphatase 2, lysosomal [Source:HGNC Symbol;Acc:HGNC:123]
ENSG00000143458	181.088	0.771953	0.18496	1.60714e-05	6.97227e-05	126626	GABPB2	GA binding protein transcription factor subunit beta 2 [Source:HGNC Symbol;Acc:HGNC:28441]
ENSG00000103249	2019.88	0.771947	0.0739686	9.05642e-26	1.44296e-24	1186	CLCN7	chloride voltage-gated channel 7 [Source:HGNC Symbol;Acc:HGNC:2025]
ENSG00000171824	1255.26	0.771749	0.0815853	1.66663e-21	2.23465e-20	5394	EXOSC10	exosome component 10 [Source:HGNC Symbol;Acc:HGNC:9138]
ENSG00000100288	225.534	0.771533	0.175418	5.59087e-06	2.57132e-05	1120	CHKB	choline kinase beta [Source:HGNC Symbol;Acc:HGNC:1938]
ENSG00000126368	398.528	0.771146	0.181698	1.16088e-05	5.12179e-05	9572	NR1D1	nuclear receptor subfamily 1 group D member 1 [Source:HGNC Symbol;Acc:HGNC:7962]
ENSG00000131711	589.909	0.770674	0.13356	4.42804e-09	2.82368e-08	4131	MAP1B	microtubule associated protein 1B [Source:HGNC Symbol;Acc:HGNC:6836]
ENSG00000176410	246.791	0.770304	0.160491	8.73999e-07	4.40212e-06	84277	DNAJC30	DnaJ heat shock protein family (Hsp40) member C30 [Source:HGNC Symbol;Acc:HGNC:16410]
ENSG00000167632	589.59	0.770201	0.132163	3.13711e-09	2.03357e-08	83696	TRAPPC9	trafficking protein particle complex 9 [Source:HGNC Symbol;Acc:HGNC:30832]
ENSG00000269386	37.3003	0.769173	0.36864	0.0177822	0.0449039	100507567	RAB11B-AS1	RAB11B antisense RNA 1 [Source:HGNC Symbol;Acc:HGNC:44178]
ENSG00000010319	70.7502	0.768177	0.292414	0.00441928	0.0128992	56920	SEMA3G	semaphorin 3G [Source:HGNC Symbol;Acc:HGNC:30400]
ENSG00000108784	842.537	0.767242	0.101726	2.40646e-14	2.25674e-13	4669	NAGLU	N-acetyl-alpha-glucosaminidase [Source:HGNC Symbol;Acc:HGNC:7632]
ENSG00000085733	4868.73	0.766667	0.0644667	7.12444e-33	1.46813e-31	2017	CTTN	cortactin [Source:HGNC Symbol;Acc:HGNC:3338]
ENSG00000186591	1749.94	0.766622	0.0763776	6.02317e-24	9.01176e-23	7328	UBE2H	ubiquitin conjugating enzyme E2 H [Source:HGNC Symbol;Acc:HGNC:12484]
ENSG00000105875	276.645	0.766557	0.163007	1.35166e-06	6.66667e-06	29062	WDR91	WD repeat domain 91 [Source:HGNC Symbol;Acc:HGNC:24997]
ENSG00000109814	476.929	0.766531	0.162009	1.22791e-06	6.09128e-06	7358	UGDH	UDP-glucose 6-dehydrogenase [Source:HGNC Symbol;Acc:HGNC:12525]
ENSG00000140848	278.721	0.766512	0.158395	7.06308e-07	3.60464e-06	221184	CPNE2	copine 2 [Source:HGNC Symbol;Acc:HGNC:2315]
ENSG00000109016	178.811	0.765495	0.190828	3.11968e-05	0.000130038	25979	DHRS7B	dehydrogenase/reductase 7B [Source:HGNC Symbol;Acc:HGNC:24547]
ENSG00000166086	1114.17	0.765258	0.154728	4.07451e-07	2.13403e-06	83700	JAM3	junctional adhesion molecule 3 [Source:HGNC Symbol;Acc:HGNC:15532]
ENSG00000090097	2805.16	0.764798	0.0634736	1.05082e-33	2.23554e-32	57060	PCBP4	poly(rC) binding protein 4 [Source:HGNC Symbol;Acc:HGNC:8652]
ENSG00000142173	2026.95	0.764218	0.0753108	1.90103e-24	2.90459e-23	1292	COL6A2	collagen type VI alpha 2 chain [Source:HGNC Symbol;Acc:HGNC:2212]
ENSG00000131187	147.871	0.764031	0.243338	0.000877006	0.00294728	2161	F12	coagulation factor XII [Source:HGNC Symbol;Acc:HGNC:3530]
ENSG00000101384	381.147	0.763933	0.180619	1.22738e-05	5.39813e-05	182	JAG1	jagged canonical Notch ligand 1 [Source:HGNC Symbol;Acc:HGNC:6188]
ENSG00000149557	445.792	0.763086	0.132739	5.22609e-09	3.30335e-08	9638	FEZ1	fasciculation and elongation protein zeta 1 [Source:HGNC Symbol;Acc:HGNC:3659]
ENSG00000113580	803.3	0.762945	0.0989984	7.10447e-15	6.87309e-14	2908	NR3C1	nuclear receptor subfamily 3 group C member 1 [Source:HGNC Symbol;Acc:HGNC:7978]
ENSG00000168701	438.188	0.762829	0.125009	6.06892e-10	4.15597e-09	29100	TMEM208	transmembrane protein 208 [Source:HGNC Symbol;Acc:HGNC:25015]
ENSG00000135916	3132.46	0.762357	0.0676294	9.81324e-30	1.81915e-28	81618	ITM2C	integral membrane protein 2C [Source:HGNC Symbol;Acc:HGNC:6175]
ENSG00000160055	119.165	0.762212	0.22124	0.000297208	0.00107462	56063	TMEM234	transmembrane protein 234 [Source:HGNC Symbol;Acc:HGNC:28837]
ENSG00000205808	295.072	0.761042	0.148779	1.7193e-07	9.35127e-07	403313	PLPP6	phospholipid phosphatase 6 [Source:HGNC Symbol;Acc:HGNC:23682]
ENSG00000198624	92.2136	0.761029	0.26204	0.00196092	0.00617467	26112	CCDC69	coiled-coil domain containing 69 [Source:HGNC Symbol;Acc:HGNC:24487]
ENSG00000196975	574.864	0.760903	0.130725	3.19849e-09	2.07155e-08	307	ANXA4	annexin A4 [Source:HGNC Symbol;Acc:HGNC:542]
ENSG00000088035	166.698	0.760802	0.185338	2.21694e-05	9.44173e-05	29929	ALG6	ALG6 alpha-1,3-glucosyltransferase [Source:HGNC Symbol;Acc:HGNC:23157]
ENSG00000174282	1032.65	0.760575	0.0844316	1.18494e-19	1.44011e-18	57659	ZBTB4	zinc finger and BTB domain containing 4 [Source:HGNC Symbol;Acc:HGNC:23847]
ENSG00000144566	678.066	0.760062	0.116031	3.17023e-11	2.41448e-10	5868	RAB5A	RAB5A, member RAS oncogene family [Source:HGNC Symbol;Acc:HGNC:9783]
ENSG00000120725	430.767	0.759806	0.130828	3.64934e-09	2.3452e-08	64374	SIL1	SIL1 nucleotide exchange factor [Source:HGNC Symbol;Acc:HGNC:24624]
ENSG00000137968	56.4372	0.759743	0.320103	0.00874537	0.0238936	204962	SLC44A5	solute carrier family 44 member 5 [Source:HGNC Symbol;Acc:HGNC:28524]
ENSG00000113716	1308.78	0.759699	0.100554	2.43214e-14	2.27987e-13	22993	HMGXB3	HMG-box containing 3 [Source:HGNC Symbol;Acc:HGNC:28982]
ENSG00000204946	413.266	0.75969	0.130768	3.49551e-09	2.25412e-08	100289678	ZNF783	zinc finger family member 783 [Source:HGNC Symbol;Acc:HGNC:27222]
ENSG00000109654	1417.67	0.759609	0.0875705	2.36073e-18	2.70035e-17	23321	TRIM2	tripartite motif containing 2 [Source:HGNC Symbol;Acc:HGNC:15974]
ENSG00000182963	757.463	0.759307	0.140081	3.16041e-08	1.8544e-07	10052	GJC1	gap junction protein gamma 1 [Source:HGNC Symbol;Acc:HGNC:4280]
ENSG00000128524	1093.09	0.758974	0.0895475	1.32913e-17	1.46473e-16	9296	ATP6V1F	ATPase H+ transporting V1 subunit F [Source:HGNC Symbol;Acc:HGNC:16832]
ENSG00000104361	154.217	0.758828	0.277427	0.00306405	0.0092518	79815	NIPAL2	NIPA like domain containing 2 [Source:HGNC Symbol;Acc:HGNC:25854]
ENSG00000183486	879.114	0.758048	0.097355	3.98026e-15	3.90475e-14	4600	MX2	MX dynamin like GTPase 2 [Source:HGNC Symbol;Acc:HGNC:7533]
ENSG00000187531	382.515	0.757912	0.124176	5.79564e-10	3.97004e-09	51547	SIRT7	sirtuin 7 [Source:HGNC Symbol;Acc:HGNC:14935]
ENSG00000256628	163.699	0.756774	0.184715	2.34708e-05	9.96181e-05	100009676	ZBTB11-AS1	ZBTB11 antisense RNA 1 [Source:HGNC Symbol;Acc:HGNC:48573]
ENSG00000148450	89.7167	0.756454	0.259068	0.00185774	0.0058771	22921	MSRB2	methionine sulfoxide reductase B2 [Source:HGNC Symbol;Acc:HGNC:17061]
ENSG00000187609	116.979	0.756238	0.225934	0.000442355	0.00155857	54932	EXD3	exonuclease 3'-5' domain containing 3 [Source:HGNC Symbol;Acc:HGNC:26023]
ENSG00000152291	3708.73	0.756065	0.0613505	4.09177e-35	9.06765e-34	10618	TGOLN2	trans-golgi network protein 2 [Source:HGNC Symbol;Acc:HGNC:15450]
ENSG00000102981	59.6486	0.755397	0.298486	0.00587018	0.0167	50855	PARD6A	par-6 family cell polarity regulator alpha [Source:HGNC Symbol;Acc:HGNC:15943]
ENSG00000132581	407.691	0.755257	0.141074	4.7565e-08	2.74054e-07	6388	SDF2	stromal cell derived factor 2 [Source:HGNC Symbol;Acc:HGNC:10675]
ENSG00000148288	282.576	0.755022	0.143068	7.28055e-08	4.11208e-07	26301	GBGT1	globoside alpha-1,3-N-acetylgalactosaminyltransferase 1 (FORS blood group) [Source:HGNC Symbol;Acc:HGNC:20460]
ENSG00000088298	460.56	0.754901	0.131164	4.7411e-09	3.01128e-08	55741	EDEM2	ER degradation enhancing alpha-mannosidase like protein 2 [Source:HGNC Symbol;Acc:HGNC:15877]
ENSG00000267169	48.4626	0.754729	0.357298	0.0165329	0.0420821	100507373	ADGRL1-AS1	ADGRL1 antisense RNA 1 [Source:HGNC Symbol;Acc:HGNC:55309]
ENSG00000170915	193.014	0.7544	0.185567	2.60345e-05	0.000109707	85315	PAQR8	progestin and adipoQ receptor family member 8 [Source:HGNC Symbol;Acc:HGNC:15708]
ENSG00000243701	42.9234	0.754176	0.355407	0.0168868	0.0428899	344595	DUBR	DPPA2 upstream binding RNA [Source:HGNC Symbol;Acc:HGNC:48569]
ENSG00000169359	498.322	0.754102	0.13324	8.77176e-09	5.41281e-08	9197	SLC33A1	solute carrier family 33 member 1 [Source:HGNC Symbol;Acc:HGNC:95]
ENSG00000095397	394.149	0.753882	0.188847	3.46949e-05	0.000143628	25861	WHRN	whirlin [Source:HGNC Symbol;Acc:HGNC:16361]
ENSG00000117408	755.074	0.753806	0.131619	5.64924e-09	3.55072e-08	9670	IPO13	importin 13 [Source:HGNC Symbol;Acc:HGNC:16853]
ENSG00000243943	192.295	0.753529	0.207732	0.00015609	0.000590472	84450	ZNF512	zinc finger protein 512 [Source:HGNC Symbol;Acc:HGNC:29380]
ENSG00000153558	51.5824	0.753119	0.33578	0.0121226	0.0320218	25827	FBXL2	F-box and leucine rich repeat protein 2 [Source:HGNC Symbol;Acc:HGNC:13598]
ENSG00000125304	2164.35	0.753076	0.0700839	3.61052e-27	6.07775e-26	9375	TM9SF2	transmembrane 9 superfamily member 2 [Source:HGNC Symbol;Acc:HGNC:11865]
ENSG00000258289	320.928	0.752973	0.145931	1.39264e-07	7.63595e-07	91612	CHURC1	churchill domain containing 1 [Source:HGNC Symbol;Acc:HGNC:20099]
ENSG00000004399	1497.65	0.752896	0.0938559	6.03376e-16	6.11534e-15	23129	PLXND1	plexin D1 [Source:HGNC Symbol;Acc:HGNC:9107]
ENSG00000159882	42.7011	0.75289	0.360444	0.0179873	0.0453858	7773	ZNF230	zinc finger protein 230 [Source:HGNC Symbol;Acc:HGNC:13024]
ENSG00000164442	979.878	0.752212	0.101861	8.78241e-14	7.96514e-13	10370	CITED2	Cbp/p300 interacting transactivator with Glu/Asp rich carboxy-terminal domain 2 [Source:HGNC Symbol;Acc:HGNC:1987]
ENSG00000136451	1478.65	0.752174	0.07978	2.41937e-21	3.22265e-20	7716	VEZF1	vascular endothelial zinc finger 1 [Source:HGNC Symbol;Acc:HGNC:12949]
ENSG00000143222	1169.18	0.751649	0.0973751	6.61683e-15	6.43197e-14	51506	UFC1	ubiquitin-fold modifier conjugating enzyme 1 [Source:HGNC Symbol;Acc:HGNC:26941]
ENSG00000117614	832.765	0.751136	0.114782	3.39294e-11	2.5797e-10	25949	SYF2	SYF2 pre-mRNA splicing factor [Source:HGNC Symbol;Acc:HGNC:19824]
ENSG00000132254	1058.39	0.751106	0.0926493	3.08463e-16	3.17532e-15	23647	ARFIP2	ADP ribosylation factor interacting protein 2 [Source:HGNC Symbol;Acc:HGNC:17160]
ENSG00000178567	429.193	0.750913	0.128602	2.86374e-09	1.86176e-08	9852	EPM2AIP1	EPM2A interacting protein 1 [Source:HGNC Symbol;Acc:HGNC:19735]
ENSG00000159842	2481.3	0.750832	0.0732455	6.53473e-25	1.01019e-23	29	ABR	ABR activator of RhoGEF and GTPase [Source:HGNC Symbol;Acc:HGNC:81]
ENSG00000107954	55.7527	0.750381	0.342251	0.0136003	0.0354332	9148	NEURL1	neuralized E3 ubiquitin protein ligase 1 [Source:HGNC Symbol;Acc:HGNC:7761]
ENSG00000236609	202.799	0.750258	0.175465	1.09938e-05	4.86683e-05	54753	ZNF853	zinc finger protein 853 [Source:HGNC Symbol;Acc:HGNC:21767]
ENSG00000123836	280.809	0.750049	0.16154	1.87148e-06	9.09006e-06	5208	PFKFB2	6-phosphofructo-2-kinase/fructose-2,6-biphosphatase 2 [Source:HGNC Symbol;Acc:HGNC:8873]
ENSG00000162413	2800.37	0.749081	0.104962	5.35334e-13	4.62246e-12	9903	KLHL21	kelch like family member 21 [Source:HGNC Symbol;Acc:HGNC:29041]
ENSG00000134775	126.715	0.748412	0.214401	0.000266532	0.000971256	80206	FHOD3	formin homology 2 domain containing 3 [Source:HGNC Symbol;Acc:HGNC:26178]
ENSG00000137414	398.852	0.748237	0.127565	2.48478e-09	1.62581e-08	51439	FAM8A1	family with sequence similarity 8 member A1 [Source:HGNC Symbol;Acc:HGNC:16372]
ENSG00000182568	334.049	0.747894	0.149437	3.00547e-07	1.59658e-06	6304	SATB1	SATB homeobox 1 [Source:HGNC Symbol;Acc:HGNC:10541]
ENSG00000130589	966.942	0.747783	0.128835	3.57594e-09	2.30134e-08	85441	HELZ2	helicase with zinc finger 2 [Source:HGNC Symbol;Acc:HGNC:30021]
ENSG00000019485	143.788	0.747434	0.229771	0.000590506	0.00204001	56981	PRDM11	PR/SET domain 11 [Source:HGNC Symbol;Acc:HGNC:13996]
ENSG00000144040	276.883	0.747239	0.161772	2.22444e-06	1.06974e-05	94097	SFXN5	sideroflexin 5 [Source:HGNC Symbol;Acc:HGNC:16073]
ENSG00000168874	273.676	0.746996	0.175278	1.12002e-05	4.95622e-05	84913	ATOH8	atonal bHLH transcription factor 8 [Source:HGNC Symbol;Acc:HGNC:24126]
ENSG00000198816	1073.89	0.746889	0.0868889	4.92766e-18	5.55088e-17	140467	ZNF358	zinc finger protein 358 [Source:HGNC Symbol;Acc:HGNC:16838]
ENSG00000105559	1189.61	0.746047	0.0913137	1.82552e-16	1.89227e-15	57664	PLEKHA4	pleckstrin homology domain containing A4 [Source:HGNC Symbol;Acc:HGNC:14339]
ENSG00000158006	225.451	0.745239	0.254532	0.00176231	0.00559899	5051	PAFAH2	platelet activating factor acetylhydrolase 2 [Source:HGNC Symbol;Acc:HGNC:8579]
ENSG00000020129	1829.51	0.745178	0.0739806	4.25207e-24	6.4091e-23	23154	NCDN	neurochondrin [Source:HGNC Symbol;Acc:HGNC:17597]
ENSG00000078687	407.448	0.744769	0.146028	1.83537e-07	9.9535e-07	57690	TNRC6C	trinucleotide repeat containing adaptor 6C [Source:HGNC Symbol;Acc:HGNC:29318]
ENSG00000147642	62.3954	0.744717	0.340131	0.0140476	0.0364709	55638	SYBU	syntabulin [Source:HGNC Symbol;Acc:HGNC:26011]
ENSG00000137266	51.1079	0.744669	0.327138	0.0116956	0.0310103	63027	SLC22A23	solute carrier family 22 member 23 [Source:HGNC Symbol;Acc:HGNC:21106]
ENSG00000196588	334.583	0.744618	0.1562	1.04603e-06	5.23085e-06	57591	MRTFA	myocardin related transcription factor A [Source:HGNC Symbol;Acc:HGNC:14334]
ENSG00000105329	2092.59	0.744606	0.0753093	2.7548e-23	4.01413e-22	7040	TGFB1	transforming growth factor beta 1 [Source:HGNC Symbol;Acc:HGNC:11766]
ENSG00000104343	274.344	0.74444	0.170334	6.94449e-06	3.15617e-05	55284	UBE2W	ubiquitin conjugating enzyme E2 W [Source:HGNC Symbol;Acc:HGNC:25616]
ENSG00000171155	200.433	0.744187	0.16303	2.79962e-06	1.32918e-05	29071	C1GALT1C1	C1GALT1 specific chaperone 1 [Source:HGNC Symbol;Acc:HGNC:24338]
ENSG00000183283	1569.93	0.744142	0.0790912	3.07366e-21	4.06991e-20	9802	DAZAP2	DAZ associated protein 2 [Source:HGNC Symbol;Acc:HGNC:2684]
ENSG00000117242	136.638	0.743911	0.198184	9.4554e-05	0.000368419	100861548	PINK1-AS	PINK1 antisense RNA [Source:HGNC Symbol;Acc:HGNC:38872]
ENSG00000154447	206.239	0.743797	0.17717	1.48169e-05	6.4538e-05	57630	SH3RF1	SH3 domain containing ring finger 1 [Source:HGNC Symbol;Acc:HGNC:17650]
ENSG00000166337	1330.77	0.743076	0.0906808	1.45358e-16	1.51446e-15	6881	TAF10	TATA-box binding protein associated factor 10 [Source:HGNC Symbol;Acc:HGNC:11543]
ENSG00000160469	556.736	0.742855	0.143838	1.33908e-07	7.35129e-07	84446	BRSK1	BR serine/threonine kinase 1 [Source:HGNC Symbol;Acc:HGNC:18994]
ENSG00000166974	590.626	0.742112	0.112004	1.9064e-11	1.4766e-10	10982	MAPRE2	microtubule associated protein RP/EB family member 2 [Source:HGNC Symbol;Acc:HGNC:6891]
ENSG00000115548	718.193	0.741982	0.149126	3.65012e-07	1.92122e-06	55818	KDM3A	lysine demethylase 3A [Source:HGNC Symbol;Acc:HGNC:20815]
ENSG00000113712	3381.58	0.741119	0.0603159	6.28792e-35	1.38112e-33	1452	CSNK1A1	casein kinase 1 alpha 1 [Source:HGNC Symbol;Acc:HGNC:2451]
ENSG00000257267	155.212	0.741079	0.193335	6.84142e-05	0.000271542	10778	ZNF271P	zinc finger protein 271, pseudogene [Source:HGNC Symbol;Acc:HGNC:13065]
ENSG00000155816	266.381	0.740607	0.183721	3.02812e-05	0.000126576	56776	FMN2	formin 2 [Source:HGNC Symbol;Acc:HGNC:14074]
ENSG00000143543	1235.68	0.740589	0.0913395	2.99529e-16	3.0862e-15	10899	JTB	jumping translocation breakpoint [Source:HGNC Symbol;Acc:HGNC:6201]
ENSG00000115129	471.816	0.739923	0.121445	6.46648e-10	4.42279e-09	9540	TP53I3	tumor protein p53 inducible protein 3 [Source:HGNC Symbol;Acc:HGNC:19373]
ENSG00000162434	1104.29	0.739875	0.0852274	2.18833e-18	2.50682e-17	3716	JAK1	Janus kinase 1 [Source:HGNC Symbol;Acc:HGNC:6190]
ENSG00000167535	384.323	0.739529	0.137131	3.91376e-08	2.27138e-07	784	CACNB3	calcium voltage-gated channel auxiliary subunit beta 3 [Source:HGNC Symbol;Acc:HGNC:1403]
ENSG00000104883	48.4695	0.739058	0.334304	0.0138431	0.0359859	92960	PEX11G	peroxisomal biogenesis factor 11 gamma [Source:HGNC Symbol;Acc:HGNC:20208]
ENSG00000106049	663.135	0.738272	0.104483	9.13913e-13	7.7594e-12	11112	HIBADH	3-hydroxyisobutyrate dehydrogenase [Source:HGNC Symbol;Acc:HGNC:4907]
ENSG00000166169	544.439	0.737018	0.127385	3.89518e-09	2.49887e-08	27343	POLL	DNA polymerase lambda [Source:HGNC Symbol;Acc:HGNC:9184]
ENSG00000154144	464.614	0.735035	0.134414	2.59472e-08	1.53539e-07	84897	TBRG1	transforming growth factor beta regulator 1 [Source:HGNC Symbol;Acc:HGNC:29551]
ENSG00000171425	395.219	0.734608	0.135317	3.16846e-08	1.85864e-07	51545	ZNF581	zinc finger protein 581 [Source:HGNC Symbol;Acc:HGNC:25017]
ENSG00000154222	1111.25	0.734496	0.105992	2.44587e-12	2.02355e-11	200014	CC2D1B	coiled-coil and C2 domain containing 1B [Source:HGNC Symbol;Acc:HGNC:29386]
ENSG00000136144	373.433	0.733704	0.137712	5.42933e-08	3.11055e-07	55213	RCBTB1	RCC1 and BTB domain containing protein 1 [Source:HGNC Symbol;Acc:HGNC:18243]
ENSG00000171862	1082.04	0.73351	0.0884632	6.4072e-17	6.81867e-16	5728	PTEN	phosphatase and tensin homolog [Source:HGNC Symbol;Acc:HGNC:9588]
ENSG00000136213	545.496	0.733294	0.126705	4.11097e-09	2.6305e-08	55501	CHST12	carbohydrate sulfotransferase 12 [Source:HGNC Symbol;Acc:HGNC:17423]
ENSG00000169228	489.602	0.733241	0.111153	2.47465e-11	1.90027e-10	53917	RAB24	RAB24, member RAS oncogene family [Source:HGNC Symbol;Acc:HGNC:9765]
ENSG00000101439	1591.73	0.73291	0.0788005	8.18558e-21	1.05816e-19	1471	CST3	cystatin C [Source:HGNC Symbol;Acc:HGNC:2475]
ENSG00000179403	263.52	0.732749	0.15272	8.98237e-07	4.5191e-06	64856	VWA1	von Willebrand factor A domain containing 1 [Source:HGNC Symbol;Acc:HGNC:30910]
ENSG00000179941	174.018	0.731617	0.181265	3.09419e-05	0.000129096	79738	BBS10	Bardet-Biedl syndrome 10 [Source:HGNC Symbol;Acc:HGNC:26291]
ENSG00000150471	131.651	0.731616	0.226433	0.000689579	0.0023546	23284	ADGRL3	adhesion G protein-coupled receptor L3 [Source:HGNC Symbol;Acc:HGNC:20974]
ENSG00000132716	1329.05	0.731244	0.0975718	4.04892e-14	3.74357e-13	50717	DCAF8	DDB1 and CUL4 associated factor 8 [Source:HGNC Symbol;Acc:HGNC:24891]
ENSG00000179698	56.2066	0.730377	0.305289	0.00877874	0.0239789	340390	WDR97	WD repeat domain 97 [Source:HGNC Symbol;Acc:HGNC:26959]
ENSG00000187098	468.34	0.729991	0.141512	1.40866e-07	7.71809e-07	4286	MITF	melanocyte inducing transcription factor [Source:HGNC Symbol;Acc:HGNC:7105]
ENSG00000114626	385.116	0.72953	0.12624	4.47901e-09	2.85292e-08	80325	ABTB1	ankyrin repeat and BTB domain containing 1 [Source:HGNC Symbol;Acc:HGNC:18275]
ENSG00000123411	170.12	0.72945	0.184413	4.39528e-05	0.000178903	64375	IKZF4	IKAROS family zinc finger 4 [Source:HGNC Symbol;Acc:HGNC:13179]
ENSG00000100417	224.585	0.728854	0.16128	3.53932e-06	1.6613e-05	5372	PMM1	phosphomannomutase 1 [Source:HGNC Symbol;Acc:HGNC:9114]
ENSG00000140400	1624.34	0.728365	0.0996715	1.62047e-13	1.44215e-12	4123	MAN2C1	mannosidase alpha class 2C member 1 [Source:HGNC Symbol;Acc:HGNC:6827]
ENSG00000116157	65.022	0.72805	0.292822	0.00689849	0.0192937	2882	GPX7	glutathione peroxidase 7 [Source:HGNC Symbol;Acc:HGNC:4559]
ENSG00000166548	291.393	0.72784	0.185396	4.77659e-05	0.000193156	7084	TK2	thymidine kinase 2 [Source:HGNC Symbol;Acc:HGNC:11831]
ENSG00000172458	120.378	0.72731	0.20622	0.000236607	0.000868299	53342	IL17D	interleukin 17D [Source:HGNC Symbol;Acc:HGNC:5984]
ENSG00000204970	97.8252	0.727252	0.260611	0.00290579	0.00880965	56147	PCDHA1	protocadherin alpha 1 [Source:HGNC Symbol;Acc:HGNC:8663]
ENSG00000131558	820.972	0.727117	0.104113	1.75526e-12	1.46685e-11	60412	EXOC4	exocyst complex component 4 [Source:HGNC Symbol;Acc:HGNC:30389]
ENSG00000247400	49.9771	0.727005	0.348579	0.0191336	0.0479586	100289274	DNAJC3-DT	DNAJC3 divergent transcript [Source:HGNC Symbol;Acc:HGNC:39808]
ENSG00000173992	289.868	0.726543	0.151649	9.66921e-07	4.85155e-06	9973	CCS	copper chaperone for superoxide dismutase [Source:HGNC Symbol;Acc:HGNC:1613]
ENSG00000119878	370.558	0.726084	0.131294	1.89236e-08	1.13389e-07	9419	CRIPT	CXXC repeat containing interactor of PDZ3 domain [Source:HGNC Symbol;Acc:HGNC:14312]
ENSG00000091136	11205.6	0.72552	0.0486928	2.16935e-50	6.88337e-49	3912	LAMB1	laminin subunit beta 1 [Source:HGNC Symbol;Acc:HGNC:6486]
ENSG00000215717	252.772	0.725417	0.151593	9.53578e-07	4.78782e-06	56900	TMEM167B	transmembrane protein 167B [Source:HGNC Symbol;Acc:HGNC:30187]
ENSG00000211445	141.947	0.72505	0.206573	0.000245684	0.000899393	2878	GPX3	glutathione peroxidase 3 [Source:HGNC Symbol;Acc:HGNC:4555]
ENSG00000171604	884.015	0.725036	0.111586	4.71336e-11	3.5498e-10	51523	CXXC5	CXXC finger protein 5 [Source:HGNC Symbol;Acc:HGNC:26943]
ENSG00000103199	220.919	0.724165	0.178694	2.88001e-05	0.000120724	26048	ZNF500	zinc finger protein 500 [Source:HGNC Symbol;Acc:HGNC:23716]
ENSG00000158792	281.566	0.723845	0.146443	4.3589e-07	2.27657e-06	124044	SPATA2L	spermatogenesis associated 2 like [Source:HGNC Symbol;Acc:HGNC:28393]
ENSG00000215769	83.1555	0.723567	0.277938	0.00502583	0.014516	109286553	ARHGAP27P1-BPTFP1-KPNA2P3	ARHGAP27P1-BPTFP1-KPNA2P3 readthrough, transcribed pseudogene [Source:HGNC Symbol;Acc:HGNC:52873]
ENSG00000102359	204.91	0.722632	0.19173	8.94841e-05	0.000349886	27286	SRPX2	sushi repeat containing protein X-linked 2 [Source:HGNC Symbol;Acc:HGNC:30668]
ENSG00000223768	338	0.72214	0.155741	2.04366e-06	9.88977e-06	642852	LINC00205	long intergenic non-protein coding RNA 205 [Source:HGNC Symbol;Acc:HGNC:16420]
ENSG00000182648	55.4608	0.721976	0.324351	0.0136505	0.0355474	100506380	LINC01006	long intergenic non-protein coding RNA 1006 [Source:HGNC Symbol;Acc:HGNC:48971]
ENSG00000197858	3086.42	0.721747	0.071373	2.95928e-24	4.49079e-23	8733	GPAA1	glycosylphosphatidylinositol anchor attachment 1 [Source:HGNC Symbol;Acc:HGNC:4446]
ENSG00000262246	747.38	0.721694	0.130188	1.66231e-08	1.00277e-07	79585	CORO7	coronin 7 [Source:HGNC Symbol;Acc:HGNC:26161]
ENSG00000074590	137.951	0.721671	0.222856	0.000687852	0.00234906	9891	NUAK1	NUAK family kinase 1 [Source:HGNC Symbol;Acc:HGNC:14311]
ENSG00000175727	1436.42	0.721419	0.0780258	1.38515e-20	1.7691e-19	22877	MLXIP	MLX interacting protein [Source:HGNC Symbol;Acc:HGNC:17055]
ENSG00000079432	2552.1	0.719877	0.0707881	1.63096e-24	2.49538e-23	23152	CIC	capicua transcriptional repressor [Source:HGNC Symbol;Acc:HGNC:14214]
ENSG00000104093	456.302	0.719699	0.1531	1.49652e-06	7.34386e-06	23312	DMXL2	Dmx like 2 [Source:HGNC Symbol;Acc:HGNC:2938]
ENSG00000161013	3048.15	0.719395	0.0660827	7.93208e-28	1.37248e-26	11282	MGAT4B	alpha-1,3-mannosyl-glycoprotein 4-beta-N-acetylglucosaminyltransferase B [Source:HGNC Symbol;Acc:HGNC:7048]
ENSG00000197841	78.9643	0.71922	0.305204	0.0097942	0.0264646	339318	ZNF181	zinc finger protein 181 [Source:HGNC Symbol;Acc:HGNC:12971]
ENSG00000196268	110.482	0.719014	0.28067	0.00561205	0.0160371	284443	ZNF493	zinc finger protein 493 [Source:HGNC Symbol;Acc:HGNC:23708]
ENSG00000065371	53.8985	0.718934	0.307756	0.0104866	0.0281177	54763	ROPN1	rhophilin associated tail protein 1 [Source:HGNC Symbol;Acc:HGNC:17692]
ENSG00000176472	48.5422	0.718722	0.323963	0.0138542	0.0360065	284346	ZNF575	zinc finger protein 575 [Source:HGNC Symbol;Acc:HGNC:27606]
ENSG00000124104	516.168	0.718473	0.131808	2.87248e-08	1.69257e-07	90203	SNX21	sorting nexin family member 21 [Source:HGNC Symbol;Acc:HGNC:16154]
ENSG00000132406	198.261	0.718424	0.175067	2.31628e-05	9.84137e-05	85013	TMEM128	transmembrane protein 128 [Source:HGNC Symbol;Acc:HGNC:28201]
ENSG00000140961	72.5309	0.718336	0.270736	0.00440841	0.0128692	29948	OSGIN1	oxidative stress induced growth inhibitor 1 [Source:HGNC Symbol;Acc:HGNC:30093]
ENSG00000121067	696.145	0.717757	0.170276	1.47442e-05	6.42519e-05	8405	SPOP	speckle type BTB/POZ protein [Source:HGNC Symbol;Acc:HGNC:11254]
ENSG00000198804	61844.9	0.717725	0.0668007	3.98293e-27	6.67447e-26	4512	MT-CO1	mitochondrially encoded cytochrome c oxidase I [Source:HGNC Symbol;Acc:HGNC:7419]
ENSG00000151229	272.622	0.716755	0.145526	4.99253e-07	2.59175e-06	114134	SLC2A13	solute carrier family 2 member 13 [Source:HGNC Symbol;Acc:HGNC:15956]
ENSG00000204227	632.897	0.715664	0.104785	5.1206e-12	4.13985e-11	6015	RING1	ring finger protein 1 [Source:HGNC Symbol;Acc:HGNC:10018]
ENSG00000228526	60.8079	0.715431	0.289885	0.00733538	0.0203955	106614088	MIR34AHG	MIR34A host gene [Source:HGNC Symbol;Acc:HGNC:51913]
ENSG00000102048	262.318	0.714751	0.154055	2.05718e-06	9.94658e-06	140462	ASB9	ankyrin repeat and SOCS box containing 9 [Source:HGNC Symbol;Acc:HGNC:17184]
ENSG00000133059	466.095	0.714452	0.116427	5.04748e-10	3.47139e-09	25778	DSTYK	dual serine/threonine and tyrosine protein kinase [Source:HGNC Symbol;Acc:HGNC:29043]
ENSG00000169871	969.865	0.714183	0.115076	3.14461e-10	2.19926e-09	81844	TRIM56	tripartite motif containing 56 [Source:HGNC Symbol;Acc:HGNC:19028]
ENSG00000163596	56.4328	0.714017	0.322649	0.0140798	0.0365289	130026	ICA1L	islet cell autoantigen 1 like [Source:HGNC Symbol;Acc:HGNC:14442]
ENSG00000184381	215.778	0.714013	0.173521	2.24042e-05	9.53265e-05	8398	PLA2G6	phospholipase A2 group VI [Source:HGNC Symbol;Acc:HGNC:9039]
ENSG00000112473	1701.45	0.713973	0.0730168	8.47372e-23	1.20488e-21	7922	SLC39A7	solute carrier family 39 member 7 [Source:HGNC Symbol;Acc:HGNC:4927]
ENSG00000131797	87.6884	0.713718	0.284416	0.0067785	0.0190033	100132341	CLUHP3	clustered mitochondria homolog pseudogene 3 [Source:HGNC Symbol;Acc:HGNC:28447]
ENSG00000143303	431.136	0.713167	0.14383	3.99521e-07	2.09505e-06	51093	RRNAD1	ribosomal RNA adenine dimethylase domain containing 1 [Source:HGNC Symbol;Acc:HGNC:24273]
ENSG00000156535	2525.11	0.71316	0.066505	4.77599e-27	7.96164e-26	135228	CD109	CD109 molecule [Source:HGNC Symbol;Acc:HGNC:21685]
ENSG00000260001	98.1043	0.712893	0.306197	0.0103351	0.0277481	100507588	TGFBR3L	transforming growth factor beta receptor 3 like [Source:HGNC Symbol;Acc:HGNC:44152]
ENSG00000197448	876.955	0.712635	0.0914058	3.77892e-15	3.71375e-14	373156	GSTK1	glutathione S-transferase kappa 1 [Source:HGNC Symbol;Acc:HGNC:16906]
ENSG00000109066	417.144	0.712125	0.125749	8.62117e-09	5.32724e-08	54868	TMEM104	transmembrane protein 104 [Source:HGNC Symbol;Acc:HGNC:25984]
ENSG00000139722	1431.42	0.712001	0.0833886	8.17111e-18	9.10355e-17	79720	VPS37B	VPS37B subunit of ESCRT-I [Source:HGNC Symbol;Acc:HGNC:25754]
ENSG00000111275	389.218	0.711386	0.129216	2.22245e-08	1.32316e-07	217	ALDH2	aldehyde dehydrogenase 2 family member [Source:HGNC Symbol;Acc:HGNC:404]
ENSG00000244486	313.301	0.711262	0.141284	2.88843e-07	1.53733e-06	91179	SCARF2	scavenger receptor class F member 2 [Source:HGNC Symbol;Acc:HGNC:19869]
ENSG00000162738	237.168	0.711205	0.190041	9.99166e-05	0.000388095	57216	VANGL2	VANGL planar cell polarity protein 2 [Source:HGNC Symbol;Acc:HGNC:15511]
ENSG00000170222	100.887	0.710796	0.244344	0.00206375	0.00646111	56985	ADPRM	ADP-ribose/CDP-alcohol diphosphatase, manganese dependent [Source:HGNC Symbol;Acc:HGNC:30925]
ENSG00000050820	1222	0.710375	0.106631	1.58687e-11	1.23769e-10	9564	BCAR1	BCAR1 scaffold protein, Cas family member [Source:HGNC Symbol;Acc:HGNC:971]
ENSG00000125991	2637.63	0.710146	0.0660571	3.80806e-27	6.40064e-26	51614	ERGIC3	ERGIC and golgi 3 [Source:HGNC Symbol;Acc:HGNC:15927]
ENSG00000079691	147.61	0.710036	0.190418	0.000110292	0.000425877	55604	CARMIL1	capping protein regulator and myosin 1 linker 1 [Source:HGNC Symbol;Acc:HGNC:21581]
ENSG00000172661	364.35	0.709914	0.128345	1.91754e-08	1.14836e-07	253725	WASHC2C	WASH complex subunit 2C [Source:HGNC Symbol;Acc:HGNC:23414]
ENSG00000165272	116.172	0.70945	0.220904	0.000768799	0.00260638	360	AQP3	aquaporin 3 (Gill blood group) [Source:HGNC Symbol;Acc:HGNC:636]
ENSG00000143862	440.425	0.709315	0.152684	2.05538e-06	9.94005e-06	127829	ARL8A	ADP ribosylation factor like GTPase 8A [Source:HGNC Symbol;Acc:HGNC:25192]
ENSG00000167280	494.783	0.709113	0.144061	5.03135e-07	2.60827e-06	64772	ENGASE	endo-beta-N-acetylglucosaminidase [Source:HGNC Symbol;Acc:HGNC:24622]
ENSG00000124587	658.019	0.708664	0.102726	3.19674e-12	2.62822e-11	5190	PEX6	peroxisomal biogenesis factor 6 [Source:HGNC Symbol;Acc:HGNC:8859]
ENSG00000084710	68.4491	0.708313	0.274404	0.00543744	0.015602	22979	EFR3B	EFR3 homolog B [Source:HGNC Symbol;Acc:HGNC:29155]
ENSG00000213903	208.365	0.707978	0.258839	0.00337355	0.010099	1241	LTB4R	leukotriene B4 receptor [Source:HGNC Symbol;Acc:HGNC:6713]
ENSG00000004975	1096.65	0.707097	0.0863966	1.65327e-16	1.71771e-15	1856	DVL2	dishevelled segment polarity protein 2 [Source:HGNC Symbol;Acc:HGNC:3086]
ENSG00000087077	1297.21	0.706838	0.0806556	1.10994e-18	1.29337e-17	7205	TRIP6	thyroid hormone receptor interactor 6 [Source:HGNC Symbol;Acc:HGNC:12311]
ENSG00000113621	574.032	0.706821	0.114795	4.34818e-10	3.00525e-09	79770	TXNDC15	thioredoxin domain containing 15 [Source:HGNC Symbol;Acc:HGNC:20652]
ENSG00000134780	241.798	0.706733	0.162175	7.63247e-06	3.4492e-05	747	DAGLA	diacylglycerol lipase alpha [Source:HGNC Symbol;Acc:HGNC:1165]
ENSG00000132429	376.225	0.706664	0.13258	5.97052e-08	3.40489e-07	64208	POPDC3	popeye domain containing 3 [Source:HGNC Symbol;Acc:HGNC:17649]
ENSG00000259330	427.168	0.706371	0.12378	7.03299e-09	4.37857e-08	100505573	INAFM2	InaF motif containing 2 [Source:HGNC Symbol;Acc:HGNC:35165]
ENSG00000088888	2448.91	0.705663	0.0732975	3.77452e-22	5.23372e-21	57506	MAVS	mitochondrial antiviral signaling protein [Source:HGNC Symbol;Acc:HGNC:29233]
ENSG00000067955	1305.88	0.705176	0.0874709	4.49533e-16	4.58733e-15	865	CBFB	core-binding factor subunit beta [Source:HGNC Symbol;Acc:HGNC:1539]
ENSG00000036054	422.658	0.70514	0.153217	2.38769e-06	1.14308e-05	55773	TBC1D23	TBC1 domain family member 23 [Source:HGNC Symbol;Acc:HGNC:25622]
ENSG00000251562	8291.19	0.704859	0.20962	0.00043444	0.00153237	378938	MALAT1	metastasis associated lung adenocarcinoma transcript 1 [Source:HGNC Symbol;Acc:HGNC:29665]
ENSG00000182919	224.113	0.704464	0.206094	0.000367724	0.00131061	28970	C11orf54	chromosome 11 open reading frame 54 [Source:HGNC Symbol;Acc:HGNC:30204]
ENSG00000215472	227.484	0.703832	0.16353	1.01866e-05	4.52832e-05	100526842	RPL17-C18orf32	RPL17-C18orf32 readthrough [Source:HGNC Symbol;Acc:HGNC:44661]
ENSG00000068912	1091.76	0.703466	0.0870384	3.90461e-16	3.99548e-15	27248	ERLEC1	endoplasmic reticulum lectin 1 [Source:HGNC Symbol;Acc:HGNC:25222]
ENSG00000187860	82.3311	0.703258	0.269706	0.00510969	0.0147411	550631	CCDC157	coiled-coil domain containing 157 [Source:HGNC Symbol;Acc:HGNC:33854]
ENSG00000138193	338.102	0.70265	0.160549	7.2633e-06	3.28969e-05	51196	PLCE1	phospholipase C epsilon 1 [Source:HGNC Symbol;Acc:HGNC:17175]
ENSG00000173083	76.7962	0.70221	0.313352	0.013475	0.0351445	10855	HPSE	heparanase [Source:HGNC Symbol;Acc:HGNC:5164]
ENSG00000174292	77.2932	0.701199	0.263219	0.00437462	0.0127822	8711	TNK1	tyrosine kinase non receptor 1 [Source:HGNC Symbol;Acc:HGNC:11940]
ENSG00000131435	1316.77	0.701043	0.097145	3.28927e-13	2.87351e-12	8572	PDLIM4	PDZ and LIM domain 4 [Source:HGNC Symbol;Acc:HGNC:16501]
ENSG00000160584	607.688	0.700978	0.121739	4.97368e-09	3.15004e-08	23387	SIK3	SIK family kinase 3 [Source:HGNC Symbol;Acc:HGNC:29165]
ENSG00000007384	2070.9	0.700736	0.0786678	3.216e-19	3.82937e-18	64285	RHBDF1	rhomboid 5 homolog 1 [Source:HGNC Symbol;Acc:HGNC:20561]
ENSG00000132535	717.431	0.700432	0.0986355	7.48505e-13	6.39881e-12	1742	DLG4	discs large MAGUK scaffold protein 4 [Source:HGNC Symbol;Acc:HGNC:2903]
ENSG00000184988	61.146	0.700208	0.299291	0.0106436	0.0284773	113277	TMEM106A	transmembrane protein 106A [Source:HGNC Symbol;Acc:HGNC:28288]
ENSG00000164296	87.6927	0.699905	0.273818	0.00590956	0.0167906	81789	TIGD6	tigger transposable element derived 6 [Source:HGNC Symbol;Acc:HGNC:18332]
ENSG00000153993	73.7564	0.699832	0.267804	0.00513747	0.0148014	223117	SEMA3D	semaphorin 3D [Source:HGNC Symbol;Acc:HGNC:10726]
ENSG00000079435	69.398	0.699693	0.297432	0.0101267	0.0272541	3991	LIPE	lipase E, hormone sensitive type [Source:HGNC Symbol;Acc:HGNC:6621]
ENSG00000204852	365.165	0.699383	0.127732	2.64888e-08	1.56661e-07	79600	TCTN1	tectonic family member 1 [Source:HGNC Symbol;Acc:HGNC:26113]
ENSG00000100201	3458.77	0.699347	0.0636476	2.75433e-28	4.85605e-27	10521	DDX17	DEAD-box helicase 17 [Source:HGNC Symbol;Acc:HGNC:2740]
ENSG00000122912	157.284	0.698378	0.217045	0.000740889	0.00251749	8034	SLC25A16	solute carrier family 25 member 16 [Source:HGNC Symbol;Acc:HGNC:10986]
ENSG00000112715	695.271	0.698269	0.101019	2.8115e-12	2.31746e-11	7422	VEGFA	vascular endothelial growth factor A [Source:HGNC Symbol;Acc:HGNC:12680]
ENSG00000235106	534.729	0.697999	0.111571	2.33972e-10	1.66236e-09	266655	BRD3OS	BRD3 opposite strand [Source:HGNC Symbol;Acc:HGNC:24742]
ENSG00000008300	803.767	0.697548	0.105898	2.68565e-11	2.05804e-10	1951	CELSR3	cadherin EGF LAG seven-pass G-type receptor 3 [Source:HGNC Symbol;Acc:HGNC:3230]
ENSG00000153162	111.606	0.697331	0.218452	0.000821294	0.00277508	654	BMP6	bone morphogenetic protein 6 [Source:HGNC Symbol;Acc:HGNC:1073]
ENSG00000181458	246.544	0.697046	0.170495	2.49837e-05	0.000105658	55076	TMEM45A	transmembrane protein 45A [Source:HGNC Symbol;Acc:HGNC:25480]
ENSG00000168610	1996.03	0.69679	0.0686516	1.952e-24	2.98043e-23	6774	STAT3	signal transducer and activator of transcription 3 [Source:HGNC Symbol;Acc:HGNC:11364]
ENSG00000099337	75.4462	0.696414	0.333866	0.0193422	0.0484433	9424	KCNK6	potassium two pore domain channel subfamily K member 6 [Source:HGNC Symbol;Acc:HGNC:6281]
ENSG00000101782	619.177	0.696209	0.131413	7.04907e-08	3.98593e-07	8780	RIOK3	RIO kinase 3 [Source:HGNC Symbol;Acc:HGNC:11451]
ENSG00000157191	803.894	0.695105	0.10549	2.76936e-11	2.12139e-10	55707	NECAP2	NECAP endocytosis associated 2 [Source:HGNC Symbol;Acc:HGNC:25528]
ENSG00000133195	299.008	0.695074	0.172986	3.39086e-05	0.000140607	201266	SLC39A11	solute carrier family 39 member 11 [Source:HGNC Symbol;Acc:HGNC:14463]
ENSG00000266412	1357.75	0.694916	0.0770483	1.19463e-19	1.45109e-18	8031	NCOA4	nuclear receptor coactivator 4 [Source:HGNC Symbol;Acc:HGNC:7671]
ENSG00000135090	414.973	0.694777	0.121614	6.85709e-09	4.27382e-08	51347	TAOK3	TAO kinase 3 [Source:HGNC Symbol;Acc:HGNC:18133]
ENSG00000115275	1784.69	0.694728	0.0793612	1.24303e-18	1.44618e-17	7841	MOGS	mannosyl-oligosaccharide glucosidase [Source:HGNC Symbol;Acc:HGNC:24862]
ENSG00000151729	790.767	0.694476	0.0941513	1.01357e-13	9.14424e-13	291	SLC25A4	solute carrier family 25 member 4 [Source:HGNC Symbol;Acc:HGNC:10990]
ENSG00000260423	187.081	0.694349	0.192453	0.000180788	0.000675778	101930452	LINC02367	long intergenic non-protein coding RNA 2367 [Source:HGNC Symbol;Acc:HGNC:53290]
ENSG00000137100	668.409	0.694167	0.111767	3.23347e-10	2.25857e-09	11258	DCTN3	dynactin subunit 3 [Source:HGNC Symbol;Acc:HGNC:2713]
ENSG00000157107	223.886	0.694077	0.183961	9.60472e-05	0.000373716	115548	FCHO2	FCH and mu domain containing endocytic adaptor 2 [Source:HGNC Symbol;Acc:HGNC:25180]
ENSG00000148842	401.347	0.69347	0.131247	7.5358e-08	4.25303e-07	54805	CNNM2	cyclin and CBS domain divalent metal cation transport mediator 2 [Source:HGNC Symbol;Acc:HGNC:103]
ENSG00000165275	146.361	0.693378	0.201566	0.000348581	0.00124725	158234	TRMT10B	tRNA methyltransferase 10B [Source:HGNC Symbol;Acc:HGNC:26454]
ENSG00000164099	326.72	0.693365	0.190572	0.000160031	0.000604052	8492	PRSS12	serine protease 12 [Source:HGNC Symbol;Acc:HGNC:9477]
ENSG00000283196	120.723	0.693363	0.222912	0.00111181	0.00367554	107985911	LSP1P5	LSP1 pseudogene 5 [Source:NCBI gene (formerly Entrezgene);Acc:645166]
ENSG00000141540	135.143	0.693242	0.252007	0.00322591	0.00969366	94015	TTYH2	tweety family member 2 [Source:HGNC Symbol;Acc:HGNC:13877]
ENSG00000245680	135.766	0.693184	0.219852	0.000902604	0.00302511	92285	ZNF585B	zinc finger protein 585B [Source:HGNC Symbol;Acc:HGNC:30948]
ENSG00000173214	155.884	0.692873	0.2138	0.000691467	0.00236069	91749	MFSD4B	major facilitator superfamily domain containing 4B [Source:HGNC Symbol;Acc:HGNC:21053]
ENSG00000078808	2520.31	0.692608	0.0682571	2.19001e-24	3.337e-23	51150	SDF4	stromal cell derived factor 4 [Source:HGNC Symbol;Acc:HGNC:24188]
ENSG00000140319	2428.22	0.692314	0.0708747	9.45991e-23	1.34169e-21	6727	SRP14	signal recognition particle 14 [Source:HGNC Symbol;Acc:HGNC:11299]
ENSG00000196544	153.536	0.692139	0.185589	0.000115555	0.000444662	54785	BORCS6	BLOC-1 related complex subunit 6 [Source:HGNC Symbol;Acc:HGNC:25939]
ENSG00000188171	70.5289	0.692042	0.304541	0.0129358	0.0339195	199777	ZNF626	zinc finger protein 626 [Source:HGNC Symbol;Acc:HGNC:30461]
ENSG00000115464	2528.2	0.691739	0.0674306	6.88394e-25	1.06344e-23	9736	USP34	ubiquitin specific peptidase 34 [Source:HGNC Symbol;Acc:HGNC:20066]
ENSG00000184371	215.823	0.691715	0.189436	0.000154504	0.000584967	1435	CSF1	colony stimulating factor 1 [Source:HGNC Symbol;Acc:HGNC:2432]
ENSG00000167380	212.965	0.691282	0.179583	6.71902e-05	0.000266873	7769	ZNF226	zinc finger protein 226 [Source:HGNC Symbol;Acc:HGNC:13019]
ENSG00000163623	171.662	0.69096	0.184179	0.000105971	0.000410186	4825	NKX6-1	NK6 homeobox 1 [Source:HGNC Symbol;Acc:HGNC:7839]
ENSG00000100211	125.599	0.690658	0.214595	0.000758645	0.00257352	25776	CBY1	chibby family member 1, beta catenin antagonist [Source:HGNC Symbol;Acc:HGNC:1307]
ENSG00000103269	130.397	0.690355	0.231011	0.0016156	0.00517484	9028	RHBDL1	rhomboid like 1 [Source:HGNC Symbol;Acc:HGNC:10007]
ENSG00000185880	114.203	0.690061	0.242614	0.00249588	0.00766327	140691	TRIM69	tripartite motif containing 69 [Source:HGNC Symbol;Acc:HGNC:17857]
ENSG00000090674	389.068	0.68991	0.151883	3.38999e-06	1.59389e-05	57192	MCOLN1	mucolipin TRP cation channel 1 [Source:HGNC Symbol;Acc:HGNC:13356]
ENSG00000172260	511.242	0.689827	0.117115	2.34513e-09	1.53668e-08	257194	NEGR1	neuronal growth regulator 1 [Source:HGNC Symbol;Acc:HGNC:17302]
ENSG00000154803	310.535	0.688975	0.181431	8.57438e-05	0.000336439	201163	FLCN	folliculin [Source:HGNC Symbol;Acc:HGNC:27310]
ENSG00000159733	152.021	0.686077	0.200519	0.000371616	0.00132374	57732	ZFYVE28	zinc finger FYVE-type containing 28 [Source:HGNC Symbol;Acc:HGNC:29334]
ENSG00000168000	551.615	0.685716	0.110428	3.27871e-10	2.28874e-09	26580	BSCL2	BSCL2 lipid droplet biogenesis associated, seipin [Source:HGNC Symbol;Acc:HGNC:15832]
ENSG00000162236	451.65	0.685419	0.122362	1.34219e-08	8.17388e-08	6811	STX5	syntaxin 5 [Source:HGNC Symbol;Acc:HGNC:11440]
ENSG00000112697	1775.63	0.684933	0.0779538	9.5369e-19	1.11595e-17	55754	TMEM30A	transmembrane protein 30A [Source:HGNC Symbol;Acc:HGNC:16667]
ENSG00000131374	1070.86	0.684911	0.0930809	1.18294e-13	1.05995e-12	9779	TBC1D5	TBC1 domain family member 5 [Source:HGNC Symbol;Acc:HGNC:19166]
ENSG00000083097	126.136	0.684518	0.221484	0.00117764	0.00387311	23033	DOP1A	DOP1 leucine zipper like protein A [Source:HGNC Symbol;Acc:HGNC:21194]
ENSG00000151612	613.6	0.684403	0.145594	1.54549e-06	7.57417e-06	152485	ZNF827	zinc finger protein 827 [Source:HGNC Symbol;Acc:HGNC:27193]
ENSG00000104368	2075.11	0.684007	0.0719649	1.21688e-21	1.64444e-20	5327	PLAT	plasminogen activator, tissue type [Source:HGNC Symbol;Acc:HGNC:9051]
ENSG00000204843	3117.58	0.683568	0.0631501	1.65625e-27	2.82422e-26	1639	DCTN1	dynactin subunit 1 [Source:HGNC Symbol;Acc:HGNC:2711]
ENSG00000119632	277.112	0.683517	0.147306	2.06932e-06	1.0001e-05	83982	IFI27L2	interferon alpha inducible protein 27 like 2 [Source:HGNC Symbol;Acc:HGNC:19753]
ENSG00000198169	293.151	0.682284	0.15349	5.2515e-06	2.42172e-05	90987	ZNF251	zinc finger protein 251 [Source:HGNC Symbol;Acc:HGNC:13045]
ENSG00000152439	105.208	0.682224	0.231857	0.00196444	0.00618312	374928	ZNF773	zinc finger protein 773 [Source:HGNC Symbol;Acc:HGNC:30487]
ENSG00000213463	572.198	0.681915	0.118387	5.27327e-09	3.33129e-08	55333	SYNJ2BP	synaptojanin 2 binding protein [Source:HGNC Symbol;Acc:HGNC:18955]
ENSG00000263753	370.815	0.681694	0.163857	1.90459e-05	8.18169e-05	339290	LINC00667	long intergenic non-protein coding RNA 667 [Source:HGNC Symbol;Acc:HGNC:27906]
ENSG00000021300	211.833	0.681637	0.184603	0.000137983	0.000526075	58473	PLEKHB1	pleckstrin homology domain containing B1 [Source:HGNC Symbol;Acc:HGNC:19079]
ENSG00000099940	405.986	0.681366	0.151828	4.32995e-06	2.01421e-05	9342	SNAP29	synaptosome associated protein 29 [Source:HGNC Symbol;Acc:HGNC:11133]
ENSG00000271122	189.819	0.681103	0.180313	9.45888e-05	0.00036849	101930085	HERPUD2-AS1	HERPUD2 antisense RNA 1 [Source:HGNC Symbol;Acc:HGNC:55258]
ENSG00000144746	1058.58	0.680876	0.0855723	1.13361e-15	1.13963e-14	10550	ARL6IP5	ADP ribosylation factor like GTPase 6 interacting protein 5 [Source:HGNC Symbol;Acc:HGNC:16937]
ENSG00000178700	190.478	0.680833	0.169717	3.61165e-05	0.000149181	200895	DHFR2	dihydrofolate reductase 2 [Source:HGNC Symbol;Acc:HGNC:27309]
ENSG00000160961	201.301	0.6806	0.191031	0.000211716	0.000783388	84449	ZNF333	zinc finger protein 333 [Source:HGNC Symbol;Acc:HGNC:15624]
ENSG00000117643	130.712	0.680421	0.21968	0.00118334	0.00389069	57134	MAN1C1	mannosidase alpha class 1C member 1 [Source:HGNC Symbol;Acc:HGNC:19080]
ENSG00000167220	273.936	0.680281	0.153721	5.8559e-06	2.68878e-05	84064	HDHD2	haloacid dehalogenase like hydrolase domain containing 2 [Source:HGNC Symbol;Acc:HGNC:25364]
ENSG00000100239	783.491	0.680147	0.119436	7.62161e-09	4.73184e-08	9701	PPP6R2	protein phosphatase 6 regulatory subunit 2 [Source:HGNC Symbol;Acc:HGNC:19253]
ENSG00000126243	338.452	0.679809	0.157596	9.63359e-06	4.29789e-05	79414	LRFN3	leucine rich repeat and fibronectin type III domain containing 3 [Source:HGNC Symbol;Acc:HGNC:28370]
ENSG00000140199	386.826	0.679369	0.145886	2.02476e-06	9.80469e-06	9990	SLC12A6	solute carrier family 12 member 6 [Source:HGNC Symbol;Acc:HGNC:10914]
ENSG00000099910	134.23	0.678939	0.239702	0.00279093	0.00848792	84861	KLHL22	kelch like family member 22 [Source:HGNC Symbol;Acc:HGNC:25888]
ENSG00000113240	113.062	0.678333	0.240455	0.00289255	0.0087707	57396	CLK4	CDC like kinase 4 [Source:HGNC Symbol;Acc:HGNC:13659]
ENSG00000196968	243.773	0.678282	0.162327	1.76887e-05	7.63388e-05	170384	FUT11	fucosyltransferase 11 [Source:HGNC Symbol;Acc:HGNC:19233]
ENSG00000113812	358.485	0.678074	0.146091	2.06877e-06	1.00005e-05	93973	ACTR8	actin related protein 8 [Source:HGNC Symbol;Acc:HGNC:14672]
ENSG00000053770	204.692	0.678023	0.177764	8.32754e-05	0.000327328	55745	AP5M1	adaptor related protein complex 5 subunit mu 1 [Source:HGNC Symbol;Acc:HGNC:20192]
ENSG00000171462	110.188	0.676894	0.227069	0.00167877	0.00535261	65989	DLK2	delta like non-canonical Notch ligand 2 [Source:HGNC Symbol;Acc:HGNC:21113]
ENSG00000214114	289.25	0.676667	0.190129	0.000216718	0.000800569	26292	MYCBP	MYC binding protein [Source:HGNC Symbol;Acc:HGNC:7554]
ENSG00000164039	168.408	0.676647	0.185623	0.000163109	0.000614837	56898	BDH2	3-hydroxybutyrate dehydrogenase 2 [Source:HGNC Symbol;Acc:HGNC:32389]
ENSG00000068028	173.328	0.676477	0.174927	6.71456e-05	0.000266743	11186	RASSF1	Ras association domain family member 1 [Source:HGNC Symbol;Acc:HGNC:9882]
ENSG00000121671	98.6231	0.676457	0.300079	0.0133214	0.0347916	1408	CRY2	cryptochrome circadian regulator 2 [Source:HGNC Symbol;Acc:HGNC:2385]
ENSG00000140948	714.005	0.676264	0.105553	9.36932e-11	6.86203e-10	23174	ZCCHC14	zinc finger CCHC-type containing 14 [Source:HGNC Symbol;Acc:HGNC:24134]
ENSG00000185666	74.0257	0.674948	0.283116	0.00976895	0.0264123	8224	SYN3	synapsin III [Source:HGNC Symbol;Acc:HGNC:11496]
ENSG00000105856	574.521	0.674623	0.16884	3.76405e-05	0.000155246	26959	HBP1	HMG-box transcription factor 1 [Source:HGNC Symbol;Acc:HGNC:23200]
ENSG00000132294	481.657	0.674012	0.127474	7.84737e-08	4.41882e-07	23167	EFR3A	EFR3 homolog A [Source:HGNC Symbol;Acc:HGNC:28970]
ENSG00000141741	572.233	0.673779	0.111374	9.14101e-10	6.18951e-09	84299	MIEN1	migration and invasion enhancer 1 [Source:HGNC Symbol;Acc:HGNC:28230]
ENSG00000101608	1038.89	0.672313	0.0890441	2.8177e-14	2.62695e-13	10627	MYL12A	myosin light chain 12A [Source:HGNC Symbol;Acc:HGNC:16701]
ENSG00000160326	175.539	0.671983	0.214153	0.00100858	0.00335145	11182	SLC2A6	solute carrier family 2 member 6 [Source:HGNC Symbol;Acc:HGNC:11011]
ENSG00000182612	48.2919	0.671831	0.318375	0.020005	0.0499076	83882	TSPAN10	tetraspanin 10 [Source:HGNC Symbol;Acc:HGNC:29942]
ENSG00000119844	458.421	0.671544	0.119348	1.15958e-08	7.08692e-08	54812	AFTPH	aftiphilin [Source:HGNC Symbol;Acc:HGNC:25951]
ENSG00000183722	70.3501	0.671419	0.286736	0.01095	0.0292026	10186	LHFPL6	LHFPL tetraspan subfamily member 6 [Source:HGNC Symbol;Acc:HGNC:6586]
ENSG00000168461	235.138	0.671226	0.156732	1.13892e-05	5.03287e-05	11031	RAB31	RAB31, member RAS oncogene family [Source:HGNC Symbol;Acc:HGNC:9771]
ENSG00000203999	85.791	0.671135	0.246311	0.00387861	0.0114674	284751	LINC01270	long intergenic non-protein coding RNA 1270 [Source:HGNC Symbol;Acc:HGNC:27658]
ENSG00000132376	708.199	0.671033	0.0961861	1.91678e-12	1.59825e-11	51763	INPP5K	inositol polyphosphate-5-phosphatase K [Source:HGNC Symbol;Acc:HGNC:33882]
ENSG00000151240	479.013	0.670083	0.120939	1.85886e-08	1.11442e-07	22982	DIP2C	disco interacting protein 2 homolog C [Source:HGNC Symbol;Acc:HGNC:29150]
ENSG00000197063	1159.02	0.669997	0.0944158	7.94402e-13	6.77045e-12	4097	MAFG	MAF bZIP transcription factor G [Source:HGNC Symbol;Acc:HGNC:6781]
ENSG00000132670	1125.37	0.669884	0.100319	1.59326e-11	1.24181e-10	5786	PTPRA	protein tyrosine phosphatase receptor type A [Source:HGNC Symbol;Acc:HGNC:9664]
ENSG00000228315	101.085	0.669739	0.314322	0.0185725	0.0466726	91316	GUSBP11	GUSB pseudogene 11 [Source:HGNC Symbol;Acc:HGNC:42325]
ENSG00000213995	812.447	0.66969	0.101361	2.56125e-11	1.96474e-10	55739	NAXD	NAD(P)HX dehydratase [Source:HGNC Symbol;Acc:HGNC:25576]
ENSG00000105443	1181.26	0.668767	0.0996451	1.19032e-11	9.36907e-11	9266	CYTH2	cytohesin 2 [Source:HGNC Symbol;Acc:HGNC:9502]
ENSG00000128694	102.576	0.668569	0.257167	0.00538802	0.0154681	64172	OSGEPL1	O-sialoglycoprotein endopeptidase like 1 [Source:HGNC Symbol;Acc:HGNC:23075]
ENSG00000141542	112.987	0.668522	0.229742	0.00219978	0.00684477	10966	RAB40B	RAB40B, member RAS oncogene family [Source:HGNC Symbol;Acc:HGNC:18284]
ENSG00000122591	498.357	0.668322	0.135872	5.27404e-07	2.72649e-06	84668	FAM126A	family with sequence similarity 126 member A [Source:HGNC Symbol;Acc:HGNC:24587]
ENSG00000153896	71.2514	0.668141	0.282211	0.0102025	0.0274352	148103	ZNF599	zinc finger protein 599 [Source:HGNC Symbol;Acc:HGNC:26408]
ENSG00000144642	390.462	0.667514	0.1427	1.77792e-06	8.65822e-06	27303	RBMS3	RNA binding motif single stranded interacting protein 3 [Source:HGNC Symbol;Acc:HGNC:13427]
ENSG00000225855	58.8494	0.667495	0.313045	0.0192131	0.0481363	284618	RUSC1-AS1	RUSC1 antisense RNA 1 [Source:HGNC Symbol;Acc:HGNC:26680]
ENSG00000162004	234.657	0.667319	0.162637	2.57064e-05	0.000108447	124093	CCDC78	coiled-coil domain containing 78 [Source:HGNC Symbol;Acc:HGNC:14153]
ENSG00000105426	4354.9	0.667303	0.0569518	6.82906e-32	1.36447e-30	5802	PTPRS	protein tyrosine phosphatase receptor type S [Source:HGNC Symbol;Acc:HGNC:9681]
ENSG00000146826	550.91	0.667061	0.115147	4.34831e-09	2.77681e-08	55262	TRAPPC14	trafficking protein particle complex 14 [Source:HGNC Symbol;Acc:HGNC:25604]
ENSG00000125734	722.428	0.665932	0.102347	4.89541e-11	3.68194e-10	56927	GPR108	G protein-coupled receptor 108 [Source:HGNC Symbol;Acc:HGNC:17829]
ENSG00000135862	8865.81	0.665931	0.0707706	3.28615e-21	4.33841e-20	3915	LAMC1	laminin subunit gamma 1 [Source:HGNC Symbol;Acc:HGNC:6492]
ENSG00000100554	395.249	0.665566	0.140241	1.25366e-06	6.21074e-06	51382	ATP6V1D	ATPase H+ transporting V1 subunit D [Source:HGNC Symbol;Acc:HGNC:13527]
ENSG00000226137	284.888	0.665524	0.144007	2.43721e-06	1.16529e-05	440465	BAIAP2-DT	BAIAP2 divergent transcript [Source:HGNC Symbol;Acc:HGNC:44342]
ENSG00000088854	174.785	0.664799	0.18105	0.000147377	0.000559977	25943	C20orf194	chromosome 20 open reading frame 194 [Source:HGNC Symbol;Acc:HGNC:17721]
ENSG00000181418	88.0124	0.664056	0.252618	0.00504054	0.0145566	23109	DDN	dendrin [Source:HGNC Symbol;Acc:HGNC:24458]
ENSG00000163320	1196.57	0.663392	0.100479	2.49224e-11	1.91246e-10	8545	CGGBP1	CGG triplet repeat binding protein 1 [Source:HGNC Symbol;Acc:HGNC:1888]
ENSG00000136802	1512.58	0.662248	0.0814621	2.72144e-16	2.80662e-15	56262	LRRC8A	leucine rich repeat containing 8 VRAC subunit A [Source:HGNC Symbol;Acc:HGNC:19027]
ENSG00000184164	465.148	0.661645	0.11432	4.47863e-09	2.85292e-08	79174	CRELD2	cysteine rich with EGF like domains 2 [Source:HGNC Symbol;Acc:HGNC:28150]
ENSG00000189339	1836.04	0.660078	0.0736181	1.99032e-19	2.39417e-18	728661	SLC35E2B	solute carrier family 35 member E2B [Source:HGNC Symbol;Acc:HGNC:33941]
ENSG00000165675	196.408	0.659986	0.174354	9.7209e-05	0.000378039	10495	ENOX2	ecto-NOX disulfide-thiol exchanger 2 [Source:HGNC Symbol;Acc:HGNC:2259]
ENSG00000148218	635.787	0.658939	0.111245	1.97212e-09	1.30066e-08	210	ALAD	aminolevulinate dehydratase [Source:HGNC Symbol;Acc:HGNC:395]
ENSG00000168101	438.344	0.658862	0.120673	3.1253e-08	1.83477e-07	84309	NUDT16L1	nudix hydrolase 16 like 1 [Source:HGNC Symbol;Acc:HGNC:28154]
ENSG00000179218	14021	0.658519	0.0525147	2.82187e-36	6.43214e-35	811	CALR	calreticulin [Source:HGNC Symbol;Acc:HGNC:1455]
ENSG00000166557	827.448	0.658411	0.0938852	1.52301e-12	1.27754e-11	23423	TMED3	transmembrane p24 trafficking protein 3 [Source:HGNC Symbol;Acc:HGNC:28889]
ENSG00000176973	938.213	0.657322	0.09077	2.77015e-13	2.43046e-12	23625	FAM89B	family with sequence similarity 89 member B [Source:HGNC Symbol;Acc:HGNC:16708]
ENSG00000236088	147.277	0.657277	0.220775	0.00183015	0.00579803	100874058	COX10-AS1	COX10 antisense RNA 1 [Source:HGNC Symbol;Acc:HGNC:38873]
ENSG00000213930	313.472	0.656554	0.148992	6.90879e-06	3.14187e-05	2592	GALT	galactose-1-phosphate uridylyltransferase [Source:HGNC Symbol;Acc:HGNC:4135]
ENSG00000106012	510.617	0.656194	0.111901	2.98558e-09	1.93985e-08	23288	IQCE	IQ motif containing E [Source:HGNC Symbol;Acc:HGNC:29171]
ENSG00000154237	442.986	0.656004	0.163502	3.8325e-05	0.000157836	79705	LRRK1	leucine rich repeat kinase 1 [Source:HGNC Symbol;Acc:HGNC:18608]
ENSG00000101745	310.936	0.655655	0.153853	1.30695e-05	5.73568e-05	23253	ANKRD12	ankyrin repeat domain 12 [Source:HGNC Symbol;Acc:HGNC:29135]
ENSG00000105472	121.014	0.655474	0.211617	0.0012089	0.00396832	6320	CLEC11A	C-type lectin domain containing 11A [Source:HGNC Symbol;Acc:HGNC:10576]
ENSG00000124164	1043.91	0.65491	0.10156	7.42141e-11	5.47669e-10	9217	VAPB	VAMP associated protein B and C [Source:HGNC Symbol;Acc:HGNC:12649]
ENSG00000198185	60.2509	0.65468	0.291294	0.0144826	0.0374696	55713	ZNF334	zinc finger protein 334 [Source:HGNC Symbol;Acc:HGNC:15806]
ENSG00000152443	190.956	0.654568	0.208717	0.00104962	0.00347972	284309	ZNF776	zinc finger protein 776 [Source:HGNC Symbol;Acc:HGNC:26765]
ENSG00000143344	174.354	0.654035	0.186234	0.000283027	0.00102767	23179	RGL1	ral guanine nucleotide dissociation stimulator like 1 [Source:HGNC Symbol;Acc:HGNC:30281]
[truncated: 4,409 more rows]
