# Supplementary material for: A Network of MicroRNAs and mRNAs Involved in Melanosome Maturation and Trafficking Defines the Lower Response of Pigmentable Melanoma Cells to Targeted Therapy
Source: Cancers (Basel). 2023 Jan 31;15(3):894. doi: 10.3390/cancers15030894 (PMC9913661; doi:10.3390/cancers15030894)
Supplement: Supplementary file 1 [file cancers-15-00894-s001.zip › Supplementary Table S5-List of the 26 DE RNAs excluded from further analyses because they are not present in the HGNC database.xlsx]

## Sheet: excluded
genename	baseMean.mel501	log2FoldChange.mel501	lfcSE.mel501	stat.mel501	pvalue.mel501	padj.mel501	baseMean.SKmel5	log2FoldChange.SKmel5	lfcSE.SKmel5	stat.SKmel5	pvalue.SKmel5	padj.SKmel5	concordant	mean.log2FC	sd.log2FC
LOC100505912	1488.49	1.80455	0.110023	16.4016	1.86411e-60	1.47519e-58	153.76	3.17368	0.21491	14.7675	2.3739e-49	1.45149e-47	TRUE	2.48911	0.968116
LOC100506688	1510.19	1.62778	0.118683	geni comuni concordi mel501 SKmel5 e non presenti o discordi DE A375 assenti in HGNC	8.21621e-43	3.31168e-41	561.858	1.65981	0.0989439	16.7753	3.70046e-63	3.31263e-61	TRUE	1.64379	0.0226525
LOC100128288	102.994	1.7971	0.259006	6.93845	3.96422e-12	2.70882e-11	80.3703	1.33492	0.21491	6.21155	5.24641e-10	3.5405e-09	TRUE	1.56601	0.326806
LOC100130370	1235.5	1.3458	0.102068	13.1853	1.06612e-39	3.85512e-38	1763.05	1.23548	0.0756992	16.321	7.00102e-60	5.72917e-58	TRUE	1.29064	0.0780045
LOC728743	456.411	1.67561	0.128069	13.0836	4.08674e-39	1.44325e-37	123.064	0.900594	0.176254	5.10964	3.22774e-07	1.57908e-06	TRUE	1.2881	0.548015
LOC100419583	1268.78	1.61036	0.0957329	16.8214	1.7006e-63	1.46883e-61	754.566	0.834678	0.0913006	9.14209	6.12593e-20	9.52576e-19	TRUE	1.22252	0.548491
LOC100507577	795.232	0.704698	0.145732	4.83556	1.32771e-06	5.06647e-06	468.754	1.6494	0.116299	14.1823	1.17859e-45	6.45158e-44	TRUE	1.17705	0.668003
LOC100506746	68.0383	0.936474	0.256132	3.65622	0.00025596	0.000703936	44.5605	1.28657	0.263748	4.87803	1.0715e-06	4.89746e-06	TRUE	1.11152	0.247557
LOC171391	63.0899	1.11623	0.247897	4.5028	6.70635e-06	2.32066e-05	64.7793	1.04483	0.22915	4.55959	5.12543e-06	2.11856e-05	TRUE	1.08053	0.0504895
LOC100288152	83.9253	0.683178	0.247579	2.75943	0.00579015	0.0124617	363.974	1.19801	0.126228	9.49089	2.29072e-21	3.87033e-20	TRUE	0.940595	0.364043
LOC642361	101.7	1.0636	0.233912	4.54704	5.44066e-06	1.90713e-05	69.9035	0.687166	0.2134	3.22008	0.00128156	0.00352389	TRUE	0.875385	0.266182
LOC101927204	75.437	0.817174	0.270054	3.02596	0.00247846	0.00573075	118.645	0.71636	0.172656	4.14905	3.33852e-05	0.000121696	TRUE	0.766767	0.0712863
LOC102724814	137.177	0.815346	0.220262	3.70171	0.000214153	0.000596667	142.662	0.716828	0.165404	4.3338	1.46557e-05	5.68103e-05	TRUE	0.766087	0.0696622
LOC101927151	551.115	0.889584	0.125415	7.09313	1.31109e-12	9.44137e-12	285.842	0.62213	0.120944	5.14394	2.69031e-07	1.33103e-06	TRUE	0.755857	0.189119
PKI55	223.745	0.972501	0.246853	3.9396	8.16182e-05	0.000241846	114.582	0.435616	0.174759	2.49266	0.0126789	0.0277616	TRUE	0.704058	0.379635
LOC642852	1082.03	0.654079	0.113329	5.7715	7.85675e-09	3.95191e-08	557.683	0.454286	0.101553	4.4734	7.69868e-06	3.10457e-05	TRUE	0.554183	0.141275
LOC103611081	264.786	0.652818	0.147337	4.43078	9.38925e-06	3.19205e-05	131.921	0.450646	0.176955	2.54668	0.0108754	0.0242186	TRUE	0.551732	0.142957
LOC101927021	184.618	0.56533	0.15852	3.5663	0.000362061	0.00096825	203.097	0.504189	0.138437	3.64201	0.000270518	0.000848799	TRUE	0.53476	0.0432329
LOC389834	282.249	0.484235	0.141961	3.41104	0.000647151	0.0016596	103.299	0.479455	0.191336	2.50583	0.0122164	0.0268908	TRUE	0.481845	0.0033806
LOC220729	955.596	0.47921	0.119456	4.0116	6.03099e-05	0.000182135	664.709	0.448216	0.090137	4.9726	6.60602e-07	3.10704e-06	TRUE	0.463713	0.0219164
LOC90768	414.486	-0.615493	0.12848	-4.79057	1.66312e-06	6.25169e-06	175.253	-0.573144	0.149427	-3.83561	0.000125255	0.000419232	TRUE	-0.594318	0.0299455
LOC101927045	156.529	-0.713303	0.19384	-3.67984	0.000233376	0.000647124	84.0507	-0.532303	0.195189	-2.72711	0.00638924	0.0150691	TRUE	-0.622803	0.127986
FLJ46906	392.914	-1.04197	0.160036	-6.51087	7.47146e-11	4.54451e-10	663.888	-0.607143	0.107325	-5.65706	1.53986e-08	8.90132e-08	TRUE	-0.824558	0.307472
LINCR-0002	1353.79	-1.01637	0.102736	-9.89308	4.46102e-23	7.0311e-22	167.497	-0.721785	0.154516	-4.67125	2.99376e-06	1.2843e-05	TRUE	-0.869078	0.208304
RNU86	63.1461	-1.38806	0.273919	-5.06741	4.03257e-07	1.64558e-06	47.0329	-0.930531	0.248641	-3.74247	0.00018222	0.000590501	TRUE	-1.1593	0.323523
LOC152225	397.145	-3.62719	0.174646	-20.7688	8.29377e-96	1.62806e-93	68.3161	-1.58341	0.23011	-6.88112	5.93843e-12	4.86699e-11	TRUE	-2.6053	1.44517
