# Supplementary material for: A Network of MicroRNAs and mRNAs Involved in Melanosome Maturation and Trafficking Defines the Lower Response of Pigmentable Melanoma Cells to Targeted Therapy
Source: Cancers (Basel). 2023 Jan 31;15(3):894. doi: 10.3390/cancers15030894 (PMC9913661; doi:10.3390/cancers15030894)
Supplement: Supplementary file 1 [file cancers-15-00894-s001.zip › Supplementary Table S6-List of the 1275 DEmRNAs.xlsx]

## Sheet: 1275 DE mRNAs
entrez_id	ensembl_gene_id	genename	baseMean.mel501	log2FoldChange.mel501	lfcSE.mel501	stat.mel501	pvalue.mel501	padj.mel501	baseMean.SKmel5	log2FoldChange.SKmel5	lfcSE.SKmel5	stat.SKmel5	pvalue.SKmel5	padj.SKmel5	mean.log2FC	sd.log2FC
146723	ENSG00000182352	C17orf77	357.514	6.32442	0.306915	20.6064	2.40527e-94	4.66098e-92	2186.36	3.38425	0.21619	15.6541	3.11612e-55	2.25404e-53	4.85434	2.07901
125206	ENSG00000154025	SLC5A10	127.449	4.58903	0.295876	15.51	2.9694e-54	1.79018e-52	33.5348	3.60496	0.358733	10.0491	9.26836e-24	1.82918e-22	4.09699	0.695848
3769	ENSG00000115474	KCNJ13	101.066	3.81202	0.287981	13.237	5.3622e-40	1.96246e-38	160.206	4.09385	0.230953	17.7259	2.64584e-70	2.76585e-68	3.95294	0.199284
443	ENSG00000108381	ASPA	241.252	4.19311	0.217586	19.271	9.40124e-83	1.5117e-80	105.676	2.78621	0.221416	12.5836	2.59867e-36	9.41974e-35	3.48966	0.994828
114794	ENSG00000166897	ELFN2	97.6442	4.19195	0.322672	12.9914	1.36987e-38	4.74897e-37	81.6275	2.12921	0.232894	9.14238	6.10905e-20	9.50864e-19	3.16058	1.45858
65061	ENSG00000138395	CDK15	511.656	3.33606	0.134053	24.8861	1.0533e-136	3.70248e-134	35.5733	2.96511	0.327756	9.04668	1.47384e-19	2.22559e-18	3.15058	0.262301
547	ENSG00000130294	KIF1A	494.87	3.73189	0.174174	21.4263	7.59944e-102	1.6892e-99	44.2136	2.48048	0.306945	8.08119	6.41392e-16	7.4605e-15	3.10619	0.884882
478	ENSG00000105409	ATP1A3	2997.17	4.85143	0.157824	30.7395	1.687e-207	1.27495e-204	852.476	1.33537	0.099341	13.4423	3.41603e-41	1.55477e-39	3.0934	2.48623
6545	ENSG00000099960	SLC7A4	199.266	4.09451	0.223326	18.3342	4.41499e-75	5.65531e-73	76.7246	2.08573	0.236048	8.83605	9.91664e-19	1.41164e-17	3.09012	1.42042
90523	ENSG00000146147	MLIP	163.16	4.11843	0.244166	16.8673	7.8275e-64	6.95957e-62	299.72	1.59613	0.127038	12.5642	3.32215e-36	1.19619e-34	2.85728	1.78354
8334	ENSG00000180573	HIST1H2AC	196.415	3.56163	0.216567	16.4459	8.97911e-61	7.21911e-59	266.473	2.06709	0.158089	13.0754	4.55047e-39	1.89055e-37	2.81436	1.0568
63827	ENSG00000132692	BCAN	9244.47	3.42348	0.092566	36.9842	2.05539e-294	3.45191e-294	7470.29	2.19122	0.0908589	24.1167	1.66981e-128	5.41118e-126	2.80735	0.871339
2494	ENSG00000116833	NR5A2	163.578	4.99538	0.290884	17.1731	4.22322e-66	4.01472e-64	81.5229	0.535832	0.203443	2.63382	0.00844307	0.019317	2.76561	3.15338
30818	ENSG00000115041	KCNIP3	1085.69	3.40185	0.135645	25.0792	8.39413e-139	3.02089e-136	919.884	2.07577	0.104853	19.7969	3.16451e-87	4.74764e-85	2.73881	0.937679
4888	ENSG00000226306	NPY6R	94.1435	3.55386	0.301476	11.7882	4.48925e-32	1.15794e-30	358.454	1.63897	0.122335	13.3974	6.26389e-41	2.79597e-39	2.59642	1.35403
6620	ENSG00000074317	SNCB	700.558	2.06747	0.142652	14.4931	1.33954e-47	6.22987e-46	121.38	2.84921	0.204366	13.9417	3.53442e-44	1.82965e-42	2.45834	0.55277
8365	ENSG00000158406	HIST1H4H	40.9946	2.9226	0.341138	8.56719	1.06038e-17	1.1564e-16	53.2455	1.90755	0.283572	6.72687	1.73356e-11	1.36149e-10	2.41507	0.717748
3479	ENSG00000017427	IGF1	405.639	2.11376	0.204744	10.3239	5.49258e-25	9.7786e-24	121.033	2.63123	0.337162	7.80403	5.99588e-15	6.39995e-14	2.37249	0.3659
100130275	ENSG00000229950	TFAP2A-AS1	802.682	2.80564	0.133699	20.9847	9.04445e-98	1.95295e-95	202.697	1.82475	0.149611	12.1966	3.23934e-34	1.08444e-32	2.31519	0.693597
57644	ENSG00000078814	MYH7B	448.451	2.73132	0.505107	5.40742	6.39406e-08	2.87638e-07	61.9763	1.83332	0.256928	7.13555	9.64041e-13	8.49394e-12	2.28232	0.634981
203190	ENSG00000168481	LGI3	313.821	3.5141	0.187649	18.727	2.98283e-78	4.13628e-76	4936.2	1.02571	0.205715	4.98607	6.16187e-07	2.91166e-06	2.26991	1.75956
1005	ENSG00000081138	CDH7	593.28	2.57404	0.136222	18.8959	1.23341e-79	1.7926e-77	198.873	1.94618	0.155777	12.4933	8.11814e-36	2.89732e-34	2.26011	0.443966
30819	ENSG00000120049	KCNIP2	370.956	2.69647	0.207686	12.9834	1.52029e-38	5.23443e-37	257.096	1.82119	0.140625	12.9507	2.32802e-38	9.33684e-37	2.25883	0.61891
197257	ENSG00000166816	LDHD	43.4249	2.88282	0.343458	8.39351	4.71838e-17	4.85158e-16	101.276	1.63024	0.192946	8.44921	2.93291e-17	3.75371e-16	2.25653	0.88571
7306	ENSG00000107165	TYRP1	262663	1.48943	0.0813671	18.305	7.54295e-75	9.42245e-73	79848.8	2.94857	0.214962	13.7167	8.06804e-43	3.93754e-41	2.219	1.03177
3732	ENSG00000085117	CD82	32.8319	2.96938	0.385644	7.69982	1.3626e-14	1.16623e-13	367.287	1.46736	0.148285	9.89559	4.35045e-23	8.25414e-22	2.21837	1.06209
11105	ENSG00000126856	PRDM7	4004.79	1.91303	0.352217	5.43141	5.5911e-08	2.5325e-07	554.254	2.51924	0.131594	19.144	1.08547e-81	1.50324e-79	2.21614	0.428655
127495	ENSG00000122477	LRRC39	350.567	1.97444	0.374731	5.26896	1.37201e-07	5.91328e-07	147.188	2.41859	0.180501	13.3993	6.10273e-41	2.73156e-39	2.19652	0.31406
79630	ENSG00000118292	C1orf54	86.8098	2.81346	0.258388	10.8885	1.30749e-27	2.69982e-26	42.4818	1.55222	0.268014	5.79155	6.97404e-09	4.19832e-08	2.18284	0.891831
144165	ENSG00000139174	PRICKLE1	98.1424	3.02347	0.266526	11.344	7.94098e-30	1.85228e-28	141.51	1.12144	0.172377	6.50574	7.73098e-11	5.66554e-10	2.07246	1.34494
4948	ENSG00000104044	OCA2	3663.13	2.84786	0.0857076	33.2276	4.30453e-242	4.33753e-239	9884.75	1.29322	0.0746906	17.3144	3.66436e-67	3.5984e-65	2.07054	1.09929
137872	ENSG00000147576	ADHFE1	38.4903	1.41152	0.363305	3.88521	0.000102242	0.000298916	92.2173	2.72638	0.228251	11.9447	6.92117e-33	2.15247e-31	2.06895	0.92975
113791	ENSG00000100100	PIK3IP1	48.516	1.36691	0.325821	4.19528	2.72538e-05	8.65956e-05	73.5211	2.76883	0.251692	11.0009	3.7833e-28	9.56331e-27	2.06787	0.991311
23551	ENSG00000100302	RASD2	235.189	2.428	0.206804	11.7406	7.89424e-32	2.00204e-30	54.9406	1.70236	0.268047	6.35098	2.13941e-10	1.5039e-09	2.06518	0.513106
10324	ENSG00000239474	KLHL41	62.2853	2.32049	0.299897	7.7376	1.01308e-14	8.75509e-14	187.057	1.79663	0.154756	11.6095	3.688e-31	1.0767e-29	2.05856	0.37042
54845	ENSG00000104413	ESRP1	765.402	2.29195	0.137705	16.6439	3.35193e-62	2.79914e-60	1143.72	1.82168	0.0874057	20.8417	1.81269e-96	3.53868e-94	2.05681	0.332524
3702	ENSG00000113263	ITK	48.8516	2.94806	0.351915	8.37718	5.42088e-17	5.54374e-16	240.072	1.14903	0.143663	7.99811	1.26339e-15	1.42554e-14	2.04854	1.27211
6331	ENSG00000183873	SCN5A	37.3372	2.37832	0.337525	7.04636	1.8366e-12	1.29964e-11	88.6218	1.64117	0.2049	8.00962	1.15068e-15	1.30472e-14	2.00975	0.521243
54550	ENSG00000103154	NECAB2	56.6211	2.31329	0.312816	7.39504	1.41368e-13	1.10257e-12	60.5141	1.69466	0.263134	6.44029	1.19245e-10	8.57577e-10	2.00397	0.437436
125704	ENSG00000187773	FAM69C	61.1757	1.99071	0.280724	7.09137	1.32795e-12	9.55807e-12	470.957	1.96096	0.121633	16.1219	1.79157e-58	1.40917e-56	1.97583	0.0210426
7145	ENSG00000079308	TNS1	204.719	0.992499	0.165094	6.01172	1.83565e-09	9.83546e-09	1021.76	2.92638	0.120352	24.3151	1.3559e-130	4.88215e-128	1.95944	1.36746
1501	ENSG00000169862	CTNND2	1027.3	1.99086	0.118203	16.8427	1.18674e-63	1.03685e-61	253.597	1.84851	0.137576	13.4362	3.70947e-41	1.6836e-39	1.91968	0.100661
3017	ENSG00000158373	HIST1H2BD	379.174	2.35666	0.154196	15.2835	9.84585e-53	5.49151e-51	450.859	1.43486	0.121654	11.7945	4.16537e-32	1.25449e-30	1.89576	0.651816
102724774	ENSG00000225328	LINC01594	59.3982	1.85555	0.272016	6.82149	9.00996e-12	5.97305e-11	60.3589	1.89355	0.246904	7.66917	1.73106e-14	1.77634e-13	1.87455	0.026867
695	ENSG00000010671	BTK	260.425	1.10078	0.138624	7.9408	2.00886e-15	1.83136e-14	136.3	2.64319	0.21031	12.5681	3.16385e-36	1.14173e-34	1.87198	1.09064
2696	ENSG00000010310	GIPR	50.339	1.69261	0.302008	5.6045	2.08861e-08	9.9966e-08	94.9579	2.02876	0.20594	9.85125	6.76996e-23	1.27255e-21	1.86068	0.2377
10129	ENSG00000073910	FRY	339.882	1.85741	0.189336	9.81013	1.01835e-22	1.57547e-21	108.632	1.82916	0.205537	8.89943	5.61343e-19	8.16976e-18	1.84329	0.0199784
57586	ENSG00000019505	SYT13	194.685	2.85674	0.223963	12.7554	2.90902e-37	9.47627e-36	561.63	0.829128	0.0967642	8.56854	1.04806e-17	1.38513e-16	1.84293	1.43373
8140	ENSG00000103257	SLC7A5	48454.1	1.75947	0.0987227	17.8223	4.74391e-71	5.3913e-69	26783.7	1.89335	0.0731176	25.8946	7.65643e-148	3.26466e-145	1.82641	0.0946724
203238	ENSG00000164989	CCDC171	1610.07	2.08564	0.126091	16.5407	1.86763e-61	1.5259e-59	909.623	1.50845	0.0909983	16.5767	1.02694e-61	8.8508e-60	1.79705	0.408132
729234	ENSG00000231584	FAHD2CP	123.029	1.75387	0.267263	6.56234	5.29704e-11	3.26262e-10	131.9	1.83677	0.181884	10.0986	5.60641e-24	1.12288e-22	1.79532	0.0586188
79674	ENSG00000197415	VEPH1	12056.8	2.03965	0.097362	20.9491	1.91113e-97	3.95709e-95	2000.43	1.46564	0.108387	13.5223	1.15477e-41	5.39212e-40	1.75264	0.405886
344148	ENSG00000176771	NCKAP5	204.116	2.50244	0.172204	14.5318	7.61893e-48	3.5764e-46	175.76	0.963098	0.166647	5.77928	7.50223e-09	4.50384e-08	1.73277	1.08848
10815	ENSG00000168993	CPLX1	388.828	2.13282	0.187251	11.3902	4.67942e-30	1.10861e-28	136.355	1.28719	0.178637	7.20563	5.77751e-13	5.21231e-12	1.71	0.597952
81544	ENSG00000158555	GDPD5	1891.96	1.85179	0.111669	16.5828	9.27421e-62	7.66009e-60	5881.64	1.54044	0.0836708	18.4107	1.07796e-75	1.28428e-73	1.69611	0.220155
55193	ENSG00000163939	PBRM1	31492.2	2.62535	0.100086	26.2308	1.18383e-151	4.97043e-149	5957.65	0.698805	0.0779414	8.96577	3.08126e-19	4.58033e-18	1.66208	1.36227
79925	ENSG00000152582	SPEF2	1744.02	2.32941	0.115089	20.2401	4.34571e-91	8.10931e-89	204.292	0.985338	0.146797	6.71224	1.91654e-11	1.49728e-10	1.65737	0.950403
101928578	ENSG00000232160	RAP2C-AS1	57.8683	1.70981	0.303753	5.62896	1.81302e-08	8.74684e-08	64.3281	1.57801	0.241699	6.52882	6.62901e-11	4.88893e-10	1.64391	0.0931979
6096	ENSG00000198963	RORB	2647.1	1.83969	0.0965943	19.0455	7.15377e-81	1.0498e-78	58.1186	1.41356	0.249005	5.67683	1.37213e-08	7.97724e-08	1.62662	0.301321
11156	ENSG00000184489	PTP4A3	139.076	1.77012	0.213434	8.29353	1.09932e-16	1.10114e-15	204.832	1.45227	0.14239	10.1992	1.99874e-24	4.07367e-23	1.6112	0.224757
22998	ENSG00000064042	LIMCH1	2112.09	2.44526	0.0964956	25.3406	1.14062e-141	4.31011e-139	2302.59	0.741037	0.0760514	9.7439	1.95889e-22	3.58238e-21	1.59315	1.20507
84698	ENSG00000180881	CAPS2	133.296	1.38277	0.196591	7.03376	2.01036e-12	1.41596e-11	134.952	1.7937	0.196671	9.12029	7.49223e-20	1.15616e-18	1.58823	0.290569
2052	ENSG00000143819	EPHX1	1153.31	2.17797	0.104721	20.7978	4.53449e-96	9.01827e-94	2027.82	0.98034	0.0927033	10.575	3.89056e-26	9.03133e-25	1.57915	0.846853
104355288	ENSG00000228262	LINC01320	60.0567	1.52958	0.345993	4.42084	9.83189e-06	3.33353e-05	50.8107	1.62828	0.257607	6.32078	2.60239e-10	1.81128e-09	1.57893	0.0697896
340273	ENSG00000004846	ABCB5	3091.39	1.59707	0.100585	15.8778	9.02703e-57	6.06416e-55	1889.42	1.55701	0.0982195	15.8524	1.35331e-56	1.00586e-54	1.57704	0.0283266
9886	ENSG00000072422	RHOBTB1	2758.96	1.621	0.0991011	16.357	3.87837e-60	3.00623e-58	2270.75	1.53113	0.0886354	17.2744	7.32803e-67	7.10995e-65	1.57606	0.0635472
9185	ENSG00000169891	REPS2	393.209	0.945243	0.150114	6.29683	3.038e-10	1.75533e-09	148.107	2.1893	0.178602	12.258	1.52275e-34	5.19436e-33	1.56727	0.879683
55808	ENSG00000070526	ST6GALNAC1	443.938	1.63246	0.185226	8.81333	1.21478e-18	1.4278e-17	151.364	1.5019	0.16685	9.00147	2.22721e-19	3.34764e-18	1.56718	0.0923222
26074	ENSG00000089101	CFAP61	5646.64	1.63093	0.140554	11.6035	3.95361e-31	9.79652e-30	1713.77	1.50159	0.103097	14.5648	4.70017e-48	2.76934e-46	1.56626	0.0914548
100287569	ENSG00000196668	LINC00173	59.401	1.59288	0.331752	4.80142	1.57544e-06	5.93685e-06	38.0513	1.53827	0.277657	5.54019	3.02146e-08	1.6841e-07	1.56558	0.0386147
64122	ENSG00000167363	FN3K	1940.35	2.15943	0.130713	16.5204	2.61708e-61	2.12673e-59	149.965	0.952698	0.157127	6.06325	1.33396e-09	8.61808e-09	1.55607	0.853291
285830	ENSG00000214922	HLA-F-AS1	326.383	1.71415	0.183135	9.36004	7.97071e-21	1.11864e-19	590.085	1.39181	0.0983337	14.154	1.76495e-45	9.53247e-44	1.55298	0.227926
9053	ENSG00000135525	MAP7	224.14	2.50421	0.186156	13.4522	2.9875e-41	1.13458e-39	1714.55	0.597322	0.0774259	7.71476	1.21208e-14	1.26217e-13	1.55077	1.34838
349075	ENSG00000178665	ZNF713	151.032	1.64252	0.206033	7.97214	1.55954e-15	1.4391e-14	97.1826	1.4514	0.199057	7.29138	3.0679e-13	2.83566e-12	1.54696	0.135142
4308	ENSG00000134160	TRPM1	18144.2	1.27429	0.119305	10.6809	1.25007e-26	2.45387e-25	8421.43	1.80594	0.0806245	22.3994	3.98656e-111	1.02531e-108	1.54012	0.375932
54149	ENSG00000154642	C21orf91	6214.68	1.67302	0.108848	15.3703	2.59075e-53	1.48331e-51	5120.92	1.38527	0.0873621	15.8567	1.2637e-56	9.43581e-55	1.52915	0.20347
57604	ENSG00000250305	KIAA1456	1010.06	1.43197	0.122035	11.7342	8.51776e-32	2.15655e-30	759.369	1.59326	0.104565	15.237	2.00912e-52	1.32873e-50	1.51262	0.114047
55793	ENSG00000143409	FAM63A	1143.43	1.78532	0.119046	14.9969	7.69427e-51	3.95574e-49	1341.41	1.23106	0.0910042	13.5275	1.07558e-41	5.03687e-40	1.50819	0.391921
27123	ENSG00000155011	DKK2	493.096	2.25472	0.128212	17.5858	3.16397e-69	3.32107e-67	75.461	0.759223	0.241353	3.1457	0.00165691	0.00447076	1.50697	1.05747
1368	ENSG00000135678	CPM	101.884	0.917377	0.234329	3.9149	9.04409e-05	0.000266059	3014.46	2.09225	0.0715388	29.2463	5.00077e-188	4.50153e-185	1.50481	0.83076
122622	ENSG00000185100	ADSSL1	69.2007	2.56004	0.285865	8.9554	3.38496e-19	4.1529e-18	132.752	0.436619	0.173499	2.51656	0.0118507	0.0261783	1.49833	1.50148
51421	ENSG00000114019	AMOTL2	144.976	1.85809	0.218767	8.49344	2.00604e-17	2.12483e-16	558.73	1.13747	0.100802	11.2842	1.57091e-29	4.26355e-28	1.49778	0.509551
221264	ENSG00000155085	AK9	297.353	1.42673	0.148492	9.60815	7.38637e-22	1.08922e-20	121.231	1.54631	0.183172	8.4418	3.12493e-17	3.99001e-16	1.48652	0.0845498
151295	ENSG00000213901	SLC23A3	56.9614	1.34517	0.266236	5.05254	4.35976e-07	1.77287e-06	44.7837	1.6187	0.272335	5.94377	2.7854e-09	1.74726e-08	1.48193	0.193413
4967	ENSG00000105953	OGDH	10520.2	1.85483	0.101322	18.3063	7.3673e-75	9.27973e-73	9775.62	1.07173	0.0667961	16.0448	6.21814e-58	4.8207e-56	1.46328	0.553739
129880	ENSG00000163093	BBS5	1211.5	1.82205	0.120764	15.0876	1.95322e-51	1.03589e-49	1337.41	1.10385	0.0933977	11.8188	3.12201e-32	9.47303e-31	1.46295	0.507844
23130	ENSG00000110046	ATG2A	2192.63	1.98454	0.114985	17.2591	9.56671e-67	9.26928e-65	942.689	0.935999	0.0976963	9.5807	9.63874e-22	1.68475e-20	1.46027	0.741431
27013	ENSG00000115649	CNPPD1	1888.87	1.46663	0.0927469	15.8133	2.52029e-56	1.65627e-54	1302.76	1.44563	0.0830452	17.4078	7.19797e-68	7.15514e-66	1.45613	0.0148477
112399	ENSG00000129521	EGLN3	85.7507	0.969997	0.221645	4.37636	1.20677e-05	4.03279e-05	81.1882	1.93526	0.216911	8.92194	4.5817e-19	6.72439e-18	1.45263	0.682547
23263	ENSG00000126217	MCF2L	2654.73	0.961173	0.0808985	11.8812	1.4818e-32	3.9225e-31	1336.48	1.94039	0.0851128	22.7979	4.81096e-115	1.2779e-112	1.45078	0.692413
2060	ENSG00000085832	EPS15	11590	1.42437	0.0875915	16.2614	1.85306e-59	1.39348e-57	7052.75	1.4759	0.0715072	20.6399	1.20284e-94	2.21473e-92	1.45013	0.0364429
8347	ENSG00000180596	HIST1H2BC	36.8031	1.48091	0.339458	4.36258	1.2854e-05	4.28042e-05	107.676	1.41506	0.188803	7.49488	6.63586e-14	6.46936e-13	1.44798	0.046566
266812	ENSG00000177432	NAP1L5	2378.07	1.5479	0.0805929	19.2065	3.26758e-82	5.14474e-80	303.413	1.34511	0.127706	10.5329	6.09386e-26	1.37903e-24	1.44651	0.143395
79092	ENSG00000141527	CARD14	170.28	0.883231	0.187156	4.71923	2.3674e-06	8.72762e-06	949.746	1.98329	0.0926746	21.4005	1.32071e-101	2.93142e-99	1.43326	0.777857
84279	ENSG00000135617	PRADC1	497.438	1.54432	0.142146	10.8644	1.70366e-27	3.494e-26	578.187	1.32073	0.107994	12.2296	2.16019e-34	7.3225e-33	1.43253	0.158108
10659	ENSG00000048740	CELF2	4782.47	0.470093	0.0818279	5.7449	9.19764e-09	4.57913e-08	3651.79	2.39431	0.0891316	26.8627	6.00179e-159	2.77848e-156	1.4322	1.36063
222166	ENSG00000180354	MTURN	11935	1.42565	0.0907292	15.7132	1.22839e-55	7.8342e-54	11343.2	1.43458	0.0771771	18.5882	4.00724e-77	4.95644e-75	1.43011	0.00631724
57556	ENSG00000092421	SEMA6A	12370.4	0.948647	0.0946328	10.0245	1.18952e-23	1.93955e-22	11817.8	1.89088	0.154753	12.2187	2.47073e-34	8.34025e-33	1.41976	0.66626
128853	ENSG00000149599	DUSP15	91.9149	1.57264	0.216797	7.25396	4.0475e-13	3.04975e-12	143.746	1.26207	0.178867	7.0559	1.71489e-12	1.4733e-11	1.41735	0.219606
136259	ENSG00000266265	KLF14	35.3057	1.84331	0.329673	5.59135	2.25311e-08	1.07432e-07	73.3229	0.967337	0.211608	4.57137	4.84541e-06	2.01102e-05	1.40533	0.61941
10404	ENSG00000104324	CPQ	943.954	1.4389	0.108952	13.2068	8.01253e-40	2.91128e-38	653.42	1.35467	0.112747	12.0151	2.95846e-33	9.30793e-32	1.39679	0.0595621
79365	ENSG00000123095	BHLHE41	13448.4	1.06299	0.0706427	15.0474	3.58858e-51	1.88995e-49	1933.41	1.69115	0.0922609	18.3301	4.76141e-75	5.63133e-73	1.37707	0.444176
3662	ENSG00000137265	IRF4	1832.01	1.63379	0.142345	11.4777	1.70795e-30	4.09772e-29	5648.12	1.1134	0.0585937	19.002	1.64097e-80	2.16168e-78	1.3736	0.367975
9306	ENSG00000170677	SOCS6	5164.68	1.72229	0.107301	16.051	5.62622e-58	4.12817e-56	2232.79	1.02072	0.0956849	10.6675	1.44444e-26	3.41669e-25	1.37151	0.496088
25809	ENSG00000100271	TTLL1	189.713	1.68424	0.166137	10.1377	3.76021e-24	6.35744e-23	136.913	1.0557	0.167395	6.30667	2.85106e-10	1.97502e-09	1.36997	0.44444
3037	ENSG00000170961	HAS2	7637.61	1.49113	0.107441	13.8786	8.5353e-44	3.53455e-42	4688.95	1.24771	0.0815356	15.3026	7.34067e-53	4.95587e-51	1.36942	0.172123
83547	ENSG00000167705	RILP	109.195	1.83252	0.212871	8.60858	7.39692e-18	8.17284e-17	136.4	0.888595	0.182908	4.85815	1.18489e-06	5.38231e-06	1.36056	0.667452
10891	ENSG00000109819	PPARGC1A	24876	1.42483	0.0973795	14.6317	1.76206e-48	8.48204e-47	15875.8	1.28892	0.069411	18.5694	5.67879e-77	6.97071e-75	1.35688	0.096101
8503	ENSG00000117461	PIK3R3	920.303	1.55319	0.108989	14.2508	4.42865e-46	1.98632e-44	2564.08	1.15208	0.0886811	12.9912	1.37176e-38	5.52902e-37	1.35264	0.283631
10133	ENSG00000123240	OPTN	898.771	1.54668	0.139195	11.1116	1.10122e-28	2.39841e-27	2045.66	1.14825	0.0828051	13.8669	1.00565e-43	5.1565e-42	1.34746	0.281733
83648	ENSG00000154319	FAM167A	646.476	1.87695	0.164202	11.4307	2.9362e-30	7.01116e-29	78.2901	0.807552	0.217558	3.71188	0.000205723	0.00066098	1.34225	0.756177
4137	ENSG00000186868	MAPT	557.304	1.1813	0.142969	8.26264	1.42484e-16	1.41594e-15	895.747	1.50001	0.0882792	16.9916	9.4769e-65	8.62664e-63	1.34065	0.225356
441027	ENSG00000249242	TMEM150C	101.195	1.64704	0.299955	5.49098	3.99714e-08	1.84987e-07	253.596	1.033	0.137842	7.49413	6.67382e-14	6.49465e-13	1.34002	0.434193
645811	ENSG00000197599	CCDC154	158.246	0.749849	0.19422	3.86081	0.000113011	0.000327484	72.1614	1.92346	0.226602	8.48826	2.09748e-17	2.71233e-16	1.33665	0.829869
115704	ENSG00000142459	EVI5L	347.601	1.82297	0.185831	9.80982	1.0215e-22	1.57872e-21	502.002	0.850145	0.0992038	8.56968	1.03772e-17	1.3737e-16	1.33656	0.687891
80221	ENSG00000167107	ACSF2	1249.26	1.86608	0.151031	12.3556	4.54472e-35	1.3549e-33	369.595	0.802012	0.112055	7.15732	8.22719e-13	7.32446e-12	1.33405	0.752411
23105	ENSG00000053108	FSTL4	163.164	1.56941	0.194212	8.08091	6.42849e-16	6.10343e-15	65.5916	1.09021	0.236845	4.60304	4.16372e-06	1.74553e-05	1.32981	0.338849
79083	ENSG00000115648	MLPH	8048.19	1.07671	0.116672	9.22848	2.74503e-20	3.64597e-19	3479.49	1.56837	0.0968139	16.1998	5.05848e-59	4.05755e-57	1.32254	0.347655
167555	ENSG00000152380	FAM151B	70.4247	1.33343	0.283053	4.71089	2.46632e-06	9.08124e-06	102.906	1.30532	0.190646	6.8468	7.55189e-12	6.11816e-11	1.31938	0.0198817
7423	ENSG00000173511	VEGFB	2437.91	1.41498	0.101641	13.9213	4.70006e-44	1.97887e-42	2073.12	1.21296	0.08065	15.0398	4.02755e-51	2.59993e-49	1.31397	0.142849
145773	ENSG00000157470	FAM81A	1996.58	1.50103	0.0941849	15.937	3.50718e-57	2.40959e-55	1197.85	1.10975	0.0771649	14.3816	6.7546e-47	3.84017e-45	1.30539	0.276672
50	ENSG00000100412	ACO2	10563.4	1.79694	0.077727	23.1186	3.01266e-118	8.75699e-116	8280.28	0.806305	0.0641373	12.5715	3.02771e-36	1.09504e-34	1.30162	0.700483
8933	ENSG00000134590	FAM127A	1897.46	1.7807	0.0958384	18.5802	4.64592e-77	6.21443e-75	1798.78	0.81844	0.0829784	9.8633	6.00435e-23	1.13522e-21	1.29957	0.68042
220108	ENSG00000150510	FAM124A	1721.47	1.17833	0.0835102	14.11	3.29439e-45	1.43501e-43	783.193	1.42017	0.0968567	14.6626	1.11919e-48	6.69159e-47	1.29925	0.171006
390595	ENSG00000246922	UBAP1L	978.352	1.70345	0.13544	12.5772	2.81722e-36	8.81621e-35	1471.52	0.881753	0.0772998	11.4069	3.86139e-30	1.07134e-28	1.2926	0.581031
10634	ENSG00000185340	GAS2L1	1067.6	1.93304	0.114631	16.8631	8.40123e-64	7.426e-62	862.179	0.650864	0.0901704	7.21816	5.26961e-13	4.7727e-12	1.29195	0.906636
3176	ENSG00000150540	HNMT	732.371	1.26873	0.127424	9.95673	2.35684e-23	3.78171e-22	149.958	1.30659	0.165903	7.87563	3.39039e-15	3.71179e-14	1.28766	0.0267716
622	ENSG00000161267	BDH1	928.379	1.38342	0.0969658	14.2671	3.50746e-46	1.57783e-44	294.884	1.17642	0.129219	9.10404	8.70313e-20	1.33539e-18	1.27992	0.146376
5091	ENSG00000173599	PC	1118.37	1.51068	0.0989915	15.2607	1.39797e-52	7.74005e-51	918.7	1.04857	0.0881244	11.8987	1.20179e-32	3.71615e-31	1.27962	0.32676
65078	ENSG00000040608	RTN4R	505.087	1.66517	0.148668	11.2006	4.05108e-29	9.07141e-28	195.237	0.889561	0.150575	5.90777	3.46771e-09	2.15442e-08	1.27736	0.548435
10768	ENSG00000168710	AHCYL1	35065.1	1.82929	0.0953971	19.1755	5.92728e-82	9.23617e-80	6794.34	0.723219	0.0566062	12.7763	2.22379e-37	8.49814e-36	1.27625	0.78211
283687	ENSG00000259642	ST20-AS1	239.337	1.64647	0.168401	9.77709	1.41216e-22	2.16919e-21	125.854	0.900969	0.177537	5.07482	3.87862e-07	1.88103e-06	1.27372	0.527147
84676	ENSG00000158022	TRIM63	3940	1.22044	0.0838216	14.5599	5.05014e-48	2.4004e-46	3208.71	1.32624	0.0969598	13.6782	1.37006e-42	6.64641e-41	1.27334	0.0748119
2805	ENSG00000120053	GOT1	8771.12	1.72471	0.105496	16.3485	4.45636e-60	3.43662e-58	3458.45	0.811111	0.0623478	13.0095	1.08103e-38	4.37897e-37	1.26791	0.646013
90668	ENSG00000186648	LRRC16B	165.588	1.39435	0.192966	7.22586	4.97928e-13	3.72767e-12	78.1913	1.13998	0.211707	5.3847	7.25643e-08	3.88424e-07	1.26716	0.179863
100499467		LINC00673	458.112	1.80387	0.144449	12.488	8.68322e-36	2.68948e-34	1434.96	0.709554	0.0805732	8.80632	1.29321e-18	1.81891e-17	1.25671	0.773799
222183	ENSG00000177679	SRRM3	319.731	1.81095	0.189396	9.56169	1.15849e-21	1.68533e-20	863.634	0.678764	0.0833159	8.14686	3.73481e-16	4.41716e-15	1.24486	0.800575
9679	ENSG00000189319	FAM53B	4759.11	1.23284	0.110935	11.1132	1.08236e-28	2.36074e-27	5786.92	1.22831	0.0615859	19.9446	1.66905e-88	2.65133e-86	1.23057	0.00320327
3899	ENSG00000144218	AFF3	1997	1.65744	0.0938872	17.6535	9.56264e-70	1.0251e-67	692.83	0.802412	0.0908163	8.83555	9.96057e-19	1.41571e-17	1.22992	0.604595
100506686	ENSG00000259673	IQCH-AS1	78.4404	1.10396	0.234454	4.70864	2.49371e-06	9.17313e-06	35.6155	1.35428	0.284532	4.75966	1.93916e-06	8.56603e-06	1.22912	0.177
255488	ENSG00000137393	RNF144B	2461.48	1.03961	0.0967633	10.7439	6.33294e-27	1.2562e-25	793.331	1.40858	0.101427	13.8876	7.53286e-44	3.8871e-42	1.2241	0.260898
89953	ENSG00000137171	KLC4	652.141	1.30274	0.154275	8.4443	3.05863e-17	3.19055e-16	304.672	1.14483	0.122117	9.37485	6.92732e-21	1.13149e-19	1.22379	0.111664
9649	ENSG00000136828	RALGPS1	177.388	1.70016	0.178782	9.50969	1.91235e-21	2.75813e-20	147.839	0.746159	0.156421	4.77018	1.84059e-06	8.15283e-06	1.22316	0.67458
57458	ENSG00000057704	TMCC3	490.095	0.959384	0.157266	6.1004	1.05806e-09	5.79652e-09	705.575	1.48601	0.113985	13.0369	7.54585e-39	3.11901e-37	1.2227	0.37238
23373	ENSG00000105662	CRTC1	681.97	1.3987	0.13512	10.3515	4.11954e-25	7.42156e-24	613.097	1.03206	0.0987149	10.455	1.39001e-25	3.05595e-24	1.21538	0.259249
51660	ENSG00000060762	MPC1	1677.35	1.35629	0.0893715	15.1759	5.11051e-52	2.78864e-50	814.39	1.05966	0.0932271	11.3664	6.14761e-30	1.6883e-28	1.20797	0.209752
22996	ENSG00000085831	TTC39A	6484.33	1.2218	0.0958192	12.7511	3.07233e-37	9.98671e-36	60.6368	1.19383	0.241331	4.94684	7.54283e-07	3.52209e-06	1.20782	0.0197822
440993		LINC00969	116.297	0.960849	0.191069	5.02881	4.93539e-07	1.99208e-06	53.3264	1.45137	0.251329	5.7748	7.70444e-09	4.61497e-08	1.20611	0.346853
9358	ENSG00000198542	ITGBL1	81.7404	0.859219	0.264143	3.25286	0.00114252	0.00279798	304.924	1.55033	0.14128	10.9735	5.12667e-28	1.28587e-26	1.20478	0.488692
6444	ENSG00000170624	SGCD	1003.89	1.28011	0.0985514	12.9893	1.40793e-38	4.86975e-37	1957.01	1.1255	0.086359	13.0328	7.96207e-39	3.27435e-37	1.2028	0.109325
2591	ENSG00000115339	GALNT3	6313.58	1.03787	0.139026	7.46528	8.31245e-14	6.65833e-13	4741.45	1.36377	0.0881537	15.4704	5.49825e-54	3.82352e-52	1.20082	0.230447
7982	ENSG00000004866	ST7	4126.18	1.42296	0.093463	15.2249	2.41749e-52	1.33359e-50	5744.63	0.965259	0.0813197	11.8699	1.696e-32	5.21447e-31	1.19411	0.323647
2259	ENSG00000102466	FGF14	171.426	1.2737	0.179782	7.08472	1.3933e-12	1.00141e-11	1120.13	1.10978	0.092072	12.0534	1.86122e-33	5.90163e-32	1.19174	0.115911
4155	ENSG00000197971	MBP	16185.3	1.90071	0.0765902	24.8166	5.93708e-136	1.9942e-133	4335.57	0.470121	0.0725912	6.47628	9.40104e-11	6.82766e-10	1.18541	1.01158
126070	ENSG00000171295	ZNF440	883.882	1.06346	0.100384	10.5939	3.18002e-26	6.10749e-25	1034.13	1.30322	0.0960633	13.5663	6.34375e-42	3.0074e-40	1.18334	0.169538
10981	ENSG00000118508	RAB32	4829.41	1.54795	0.0820876	18.8573	2.55819e-79	3.68258e-77	1613.68	0.800248	0.0789624	10.1345	3.88214e-24	7.83341e-23	1.1741	0.528707
84074	ENSG00000129646	QRICH2	35.7658	1.14749	0.321711	3.56683	0.000361329	0.000966636	234.827	1.19837	0.131701	9.09921	9.0994e-20	1.39487e-18	1.17293	0.0359821
130540	ENSG00000155749	ALS2CR12	114.161	0.548642	0.197172	2.78256	0.0053932	0.0116805	137.677	1.79622	0.188281	9.54008	1.42727e-21	2.46022e-20	1.17243	0.882168
6821	ENSG00000139531	SUOX	1499.46	1.71749	0.149223	11.5095	1.18114e-30	2.86565e-29	796.985	0.624757	0.0865279	7.22029	5.18755e-13	4.70627e-12	1.17112	0.77268
79974	ENSG00000106034	CPED1	575.528	0.885048	0.148632	5.95462	2.60681e-09	1.37337e-08	427.349	1.43622	0.127763	11.2413	2.5561e-29	6.8457e-28	1.16063	0.389735
145407	ENSG00000139971	C14orf37	258.436	1.2956	0.397807	3.25685	0.00112657	0.00276476	248.712	1.02509	0.131726	7.78195	7.14136e-15	7.58266e-14	1.16034	0.19128
7957	ENSG00000112425	EPM2A	628.474	1.10461	0.11367	9.71772	2.53389e-22	3.86086e-21	376.268	1.21527	0.112684	10.7847	4.06429e-27	9.79966e-26	1.15994	0.0782424
5873	ENSG00000069974	RAB27A	15143.7	1.1299	0.0852033	13.2613	3.88298e-40	1.43149e-38	5597.88	1.18819	0.0889372	13.3599	1.03765e-40	4.61898e-39	1.15905	0.0412134
11092	ENSG00000165698	C9orf9	48.9311	1.30392	0.282391	4.61741	3.88563e-06	1.39438e-05	50.2023	1.01187	0.248056	4.07918	4.51951e-05	0.000161619	1.15789	0.20651
55753	ENSG00000197444	OGDHL	130.625	1.6676	0.209227	7.97028	1.58316e-15	1.46001e-14	1354.51	0.642353	0.0768011	8.36385	6.07042e-17	7.58943e-16	1.15498	0.72496
8514	ENSG00000069424	KCNAB2	14635.2	1.18346	0.120947	9.78498	1.30618e-22	2.00844e-21	8875.07	1.12125	0.0604407	18.5513	7.95673e-77	9.69345e-75	1.15236	0.0439858
7067	ENSG00000126351	THRA	1670.88	1.46671	0.0916045	16.0114	1.06454e-57	7.62581e-56	890.17	0.830715	0.0926749	8.96375	3.13818e-19	4.66068e-18	1.14871	0.449718
2738	ENSG00000250571	GLI4	383.348	1.40689	0.165946	8.47796	2.29174e-17	2.41618e-16	309.173	0.885726	0.144186	6.14295	8.10042e-10	5.34627e-09	1.14631	0.368517
400954	ENSG00000214595	EML6	136.493	1.29307	0.191024	6.76916	1.29535e-11	8.41754e-11	215.4	0.995508	0.138363	7.19488	6.25148e-13	5.62425e-12	1.14429	0.210407
2110	ENSG00000171503	ETFDH	1351.74	1.54804	0.0973135	15.9078	5.59736e-57	3.7939e-55	1049.4	0.733258	0.0827327	8.86298	7.79013e-19	1.12399e-17	1.14065	0.576138
282997	ENSG00000203497	PDCD4-AS1	67.7002	1.20806	0.295095	4.09378	4.24396e-05	0.000131127	102.864	1.06424	0.193513	5.49958	3.80697e-08	2.09882e-07	1.13615	0.101693
9145	ENSG00000100321	SYNGR1	237.116	1.85388	0.177472	10.446	1.52759e-25	2.80895e-24	786.965	0.41335	0.0865278	4.77707	1.77866e-06	7.90014e-06	1.13361	1.01861
6520	ENSG00000168003	SLC3A2	6990.44	1.24412	0.0778014	15.9909	1.47761e-57	1.0388e-55	4497.23	1.02256	0.0799928	12.7832	2.03643e-37	7.83758e-36	1.13334	0.156666
4987	ENSG00000125510	OPRL1	38.619	1.38595	0.344295	4.02548	5.68596e-05	0.000172361	128.186	0.872446	0.1777	4.90967	9.12321e-07	4.21389e-06	1.1292	0.363105
6490	ENSG00000185664	PMEL	155867	1.04278	0.0905655	11.5141	1.12055e-30	2.72301e-29	134536	1.21149	0.0820186	14.7709	2.2555e-49	1.38431e-47	1.12713	0.119299
9881	ENSG00000168016	TRANK1	167.002	1.60467	0.188749	8.50163	1.86946e-17	1.98712e-16	1043.15	0.648707	0.0839844	7.72413	1.12618e-14	1.17498e-13	1.12669	0.67597
29988	ENSG00000136856	SLC2A8	68.9783	1.256	0.24548	5.11653	3.11209e-07	1.28495e-06	121.355	0.983869	0.176591	5.57145	2.52624e-08	1.42474e-07	1.11994	0.192429
100885776	ENSG00000249348	UGDH-AS1	40.1982	0.988864	0.315739	3.1319	0.00173678	0.00413603	32.1768	1.23835	0.294068	4.21109	2.54143e-05	9.47074e-05	1.11361	0.176411
487	ENSG00000196296	ATP2A1	181.824	1.23885	0.185099	6.69288	2.18816e-11	1.40382e-10	66.1815	0.984568	0.220411	4.46697	7.93343e-06	3.19367e-05	1.11171	0.179803
10003	ENSG00000077616	NAALAD2	283.784	0.524627	0.179699	2.91947	0.00350625	0.00787592	230.748	1.69731	0.152158	11.1549	6.77812e-29	1.75721e-27	1.11097	0.829211
80765	ENSG00000172345	STARD5	134.169	1.26378	0.210837	5.99413	2.04576e-09	1.09033e-08	91.1615	0.952203	0.199957	4.76203	1.91656e-06	8.47082e-06	1.10799	0.22032
999	ENSG00000039068	CDH1	51.3985	0.754085	0.292318	2.57967	0.00988942	0.0202848	3111.15	1.45445	0.083845	17.3468	2.08385e-67	2.05882e-65	1.10427	0.49523
337876	ENSG00000198108	CHSY3	836.299	1.59605	0.124421	12.8278	1.1457e-37	3.83124e-36	182.75	0.609347	0.150098	4.05967	4.91425e-05	0.000174503	1.1027	0.697702
101410538	ENSG00000126005	MMP24-AS1	1136.01	1.39386	0.135585	10.2804	8.63759e-25	1.51987e-23	918.947	0.804003	0.100121	8.0303	9.72362e-16	1.11265e-14	1.09893	0.417095
6812	ENSG00000136854	STXBP1	33592.5	1.26998	0.0809162	15.695	1.63719e-55	1.0354e-53	8823.04	0.900832	0.0719984	12.5118	6.43289e-36	2.30093e-34	1.0854	0.261025
51533	ENSG00000010318	PHF7	451.586	1.28813	0.148982	8.64622	5.32354e-18	5.96095e-17	278.27	0.88262	0.141852	6.22213	4.90449e-10	3.32222e-09	1.08538	0.28674
23632	ENSG00000118298	CA14	1469.6	0.77449	0.104127	7.43796	1.02254e-13	8.092e-13	1278.02	1.39572	0.101063	13.8104	2.20598e-43	1.1135e-41	1.0851	0.439276
155185	ENSG00000174945	AMZ1	171.144	1.28132	0.173161	7.39959	1.36603e-13	1.06595e-12	321.845	0.884265	0.144084	6.13714	8.40195e-10	5.54077e-09	1.08279	0.280762
254778	ENSG00000169085	C8orf46	175.726	0.947519	0.178039	5.32199	1.02638e-07	4.50588e-07	283.337	1.21631	0.128014	9.5014	2.07078e-21	3.52076e-20	1.08192	0.190064
113452	ENSG00000121900	TMEM54	286.044	1.72502	0.144735	11.9185	9.48394e-33	2.54618e-31	459.085	0.43805	0.107872	4.06084	4.88973e-05	0.00017367	1.08154	0.910028
745	ENSG00000124920	MYRF	209.46	1.66603	0.215006	7.74874	9.28099e-15	8.05294e-14	381.308	0.495542	0.111145	4.45851	8.25295e-06	3.31489e-05	1.08079	0.827659
55117	ENSG00000072041	SLC6A15	15105.5	0.831029	0.0835044	9.95193	2.4735e-23	3.96468e-22	5064.07	1.32983	0.0823316	16.1521	1.09795e-58	8.67812e-57	1.08043	0.352703
36	ENSG00000196177	ACADSB	1796.74	1.44166	0.105367	13.6822	1.29671e-42	5.17142e-41	1517.28	0.713054	0.084689	8.41968	3.77518e-17	4.77885e-16	1.07736	0.515202
11257	ENSG00000182165	TP53TG1	66.8624	0.91413	0.262524	3.48209	0.000497524	0.00129813	79.8466	1.23795	0.209825	5.89991	3.63694e-09	2.2561e-08	1.07604	0.228976
56884	ENSG00000168843	FSTL5	3747.42	1.68398	0.0851923	19.7668	5.74844e-87	9.98708e-85	2480.83	0.467823	0.0763132	6.13031	8.77084e-10	5.7723e-09	1.0759	0.859954
90525	ENSG00000138606	SHF	220.929	1.46169	0.183816	7.95191	1.83652e-15	1.68135e-14	73.6357	0.688426	0.22179	3.10396	0.00190949	0.0050812	1.07506	0.54678
1657	ENSG00000172869	DMXL1	3828.65	1.45296	0.0800279	18.1557	1.1581e-73	1.40038e-71	3913.56	0.695338	0.0811453	8.56905	1.04347e-17	1.38019e-16	1.07415	0.53572
11167	ENSG00000163430	FSTL1	3403.34	0.747795	0.113996	6.55984	5.38654e-11	3.311e-10	6385.48	1.3987	0.0867889	16.1161	1.96491e-58	1.53804e-56	1.07325	0.460261
83636	ENSG00000131943	C19orf12	1223.79	1.22163	0.113349	10.7776	4.39199e-27	8.80436e-26	1175.82	0.923978	0.0834785	11.0685	1.78452e-28	4.5463e-27	1.0728	0.210469
3419	ENSG00000166411	IDH3A	9842.5	1.5728	0.102052	15.4118	1.36396e-53	7.95996e-52	7996.66	0.556967	0.0640223	8.69958	3.33103e-18	4.55082e-17	1.06489	0.718304
152302	ENSG00000186162	CIDECP	201.578	1.49386	0.168859	8.84679	9.00691e-19	1.07281e-17	162.112	0.634652	0.151947	4.1768	2.9564e-05	0.00010882	1.06426	0.607553
643224	ENSG00000159247	TUBBP5	50.2812	1.37106	0.311141	4.40657	1.05022e-05	3.54491e-05	93.2398	0.752925	0.191815	3.92527	8.66326e-05	0.000297522	1.06199	0.437088
26750	ENSG00000136643	RPS6KC1	4380.14	1.08269	0.0785685	13.7802	3.35548e-43	1.36339e-41	2929.11	1.02623	0.0674788	15.2082	3.12085e-52	2.04725e-50	1.05446	0.0399203
9194	ENSG00000118596	SLC16A7	5332.56	0.908028	0.0914508	9.92914	3.1092e-23	4.95733e-22	3587.25	1.19818	0.0972206	12.3243	6.70119e-35	2.31513e-33	1.0531	0.205166
3131	ENSG00000108924	HLF	49.7405	0.979748	0.277388	3.53205	0.000412344	0.00109228	67.2436	1.12384	0.225301	4.98817	6.09534e-07	2.88527e-06	1.05179	0.101887
171425	ENSG00000125246	CLYBL	291.69	0.920724	0.184768	4.98315	6.25584e-07	2.489e-06	226.886	1.17688	0.139724	8.42293	3.67172e-17	4.6588e-16	1.0488	0.181131
5869	ENSG00000111540	RAB5B	7010.36	1.26271	0.0869332	14.5251	8.40608e-48	3.93368e-46	10980.5	0.831273	0.065886	12.6168	1.70518e-36	6.20877e-35	1.04699	0.305072
619207	ENSG00000214279	SCART1	96.0326	0.623509	0.277975	2.24304	0.0248942	0.0463732	81.2877	1.46901	0.211843	6.93446	4.07772e-12	3.39175e-11	1.04626	0.597862
100132707	ENSG00000214106	PAXIP1-AS2	153.802	1.23654	0.18162	6.80841	9.86834e-12	6.51354e-11	281.654	0.855397	0.12529	6.82734	8.65039e-12	6.99412e-11	1.04597	0.269512
84256	ENSG00000059122	FLYWCH1	1624.67	1.15716	0.0876725	13.1987	8.93086e-40	3.23717e-38	1589.1	0.922243	0.0799155	11.5402	8.2703e-31	2.38017e-29	1.0397	0.166111
27314	ENSG00000137502	RAB30	1029.39	1.46831	0.09566	15.3493	3.58274e-53	2.04351e-51	495.13	0.59738	0.129405	4.61637	3.90502e-06	1.64859e-05	1.03285	0.615841
23580	ENSG00000179604	CDC42EP4	600.313	0.855186	0.133481	6.4068	1.48609e-10	8.82254e-10	949.062	1.20931	0.0874583	13.8273	1.7456e-43	8.92238e-42	1.03225	0.250403
10493	ENSG00000108828	VAT1	18975.9	1.34809	0.0778877	17.3081	4.08776e-67	4.03833e-65	17611.6	0.707749	0.0702896	10.069	7.57133e-24	1.50341e-22	1.02792	0.452788
26009	ENSG00000036549	ZZZ3	4785.1	1.16352	0.112713	10.3228	5.55555e-25	9.87908e-24	3401.03	0.89127	0.0838239	10.6326	2.10062e-26	4.91144e-25	1.0274	0.19251
6819	ENSG00000198203	SULT1C2	216.282	0.834578	0.196572	4.24566	2.17948e-05	7.02256e-05	313.616	1.21007	0.120649	10.0296	1.12928e-23	2.20721e-22	1.02232	0.26551
3032	ENSG00000138029	HADHB	6692.11	1.26201	0.0735329	17.1626	5.0621e-66	4.7821e-64	5435.69	0.780967	0.0659605	11.8399	2.42683e-32	7.39135e-31	1.02149	0.340151
65065	ENSG00000144426	NBEAL1	1467.48	1.18456	0.132222	8.95885	3.2807e-19	4.02825e-18	825.151	0.853549	0.108286	7.88233	3.21319e-15	3.52494e-14	1.01905	0.234061
2889	ENSG00000107263	RAPGEF1	3181.27	0.991262	0.0843809	11.7475	7.27624e-32	1.85778e-30	4700.24	1.04306	0.0644007	16.1965	5.34058e-59	4.24183e-57	1.01716	0.0366295
375287	ENSG00000184898	RBM43	127.375	1.19617	0.211308	5.6608	1.50665e-08	7.33667e-08	541.724	0.833594	0.106967	7.79303	6.54224e-15	6.96478e-14	1.01488	0.256383
6450	ENSG00000185437	SH3BGR	137.866	1.18629	0.182969	6.48359	8.95678e-11	5.40446e-10	90.9298	0.842782	0.197797	4.26084	2.03657e-05	7.71173e-05	1.01454	0.242899
145483	ENSG00000156050	FAM161B	89.7646	1.16242	0.213504	5.44447	5.19602e-08	2.36417e-07	98.7685	0.863362	0.186675	4.62496	3.74679e-06	1.58593e-05	1.01289	0.211464
2012	ENSG00000134531	EMP1	6637.58	1.46377	0.117397	12.4685	1.10827e-35	3.40476e-34	984.291	0.561708	0.104617	5.36919	7.90906e-08	4.21548e-07	1.01274	0.637851
79137	ENSG00000144567	FAM134A	3374.04	1.19013	0.0761419	15.6304	4.52084e-55	2.78908e-53	3403.82	0.834118	0.0658343	12.67	8.67485e-37	3.22382e-35	1.01212	0.251736
4835	ENSG00000124588	NQO2	1331.11	1.53118	0.101045	15.1535	7.18488e-52	3.87855e-50	1023.69	0.491595	0.0780611	6.29757	3.02353e-10	2.08735e-09	1.01139	0.735099
51171	ENSG00000087076	HSD17B14	430.659	1.36121	0.13763	9.89036	4.58373e-23	7.21699e-22	1425.24	0.658471	0.0738417	8.91734	4.77622e-19	6.9972e-18	1.00984	0.496911
58528	ENSG00000025039	RRAGD	4393.16	1.2596	0.0780835	16.1314	1.53414e-58	1.13669e-56	4134.44	0.757204	0.0626832	12.0799	1.34963e-33	4.32173e-32	1.0084	0.355247
25874	ENSG00000143158	MPC2	1741.46	1.60295	0.101734	15.7563	6.21703e-56	4.03306e-54	1044.67	0.408448	0.0925667	4.41247	1.02198e-05	4.05787e-05	1.0057	0.844643
79961	ENSG00000162777	DENND2D	3195.67	0.504401	0.123268	4.09191	4.2784e-05	0.000132136	78.5464	1.50358	0.240419	6.25399	4.00106e-10	2.7308e-09	1.00399	0.706525
25934	ENSG00000136783	NIPSNAP3A	349.583	1.13479	0.139144	8.15552	3.47686e-16	3.35586e-15	382.567	0.873062	0.120349	7.25444	4.03337e-13	3.68391e-12	1.00393	0.185072
140733	ENSG00000172264	MACROD2	115.491	0.969969	0.217519	4.45925	8.22481e-06	2.81263e-05	47.7424	1.03459	0.254123	4.07122	4.67678e-05	0.000166912	1.00228	0.0456955
100128782	ENSG00000175611	LINC00476	429.519	0.940104	0.133197	7.05799	1.68932e-12	1.20274e-11	42.6403	1.05709	0.283666	3.72653	0.000194134	0.000625979	0.998597	0.0827211
55313	ENSG00000103381	CPPED1	1872.39	1.52649	0.0953433	16.0104	1.08061e-57	7.70442e-56	1124.76	0.469503	0.085046	5.52058	3.37887e-08	1.873e-07	0.997995	0.7474
5864	ENSG00000105649	RAB3A	2007.4	1.56205	0.125509	12.4457	1.47627e-35	4.48069e-34	540.161	0.433607	0.118077	3.67225	0.000240421	0.000762637	0.997828	0.797928
11247	ENSG00000182379	NXPH4	379.25	1.54253	0.171054	9.01778	1.91937e-19	2.40758e-18	345.03	0.450412	0.11332	3.9747	7.04674e-05	0.000244965	0.99647	0.772243
55902	ENSG00000131069	ACSS2	1266.42	1.53411	0.126991	12.0805	1.33974e-33	3.77099e-32	1768.64	0.455793	0.0980007	4.65092	3.3046e-06	1.40758e-05	0.99495	0.762483
93953	ENSG00000147174	ACRC	36.7608	0.796438	0.349826	2.27667	0.022806	0.0428427	44.0731	1.19026	0.270856	4.39444	1.11058e-05	4.39646e-05	0.99335	0.278475
118	ENSG00000087274	ADD1	7529.58	1.14845	0.0832943	13.7878	3.01627e-43	1.23219e-41	8470.94	0.827405	0.064765	12.7755	2.24718e-37	8.56729e-36	0.987927	0.227013
286495	ENSG00000215105	TTC3P1	117.083	1.14539	0.191778	5.97249	2.33663e-09	1.23663e-08	42.4646	0.827046	0.259168	3.19116	0.00141702	0.00386531	0.986219	0.225105
6508	ENSG00000114923	SLC4A3	104.708	1.5099	0.273818	5.51424	3.50284e-08	1.63412e-07	542.605	0.460982	0.105082	4.38689	1.14984e-05	4.54299e-05	0.985439	0.741695
108	ENSG00000078295	ADCY2	2579.96	0.963929	0.0937003	10.2874	8.03489e-25	1.41878e-23	6195.56	1.00298	0.0643282	15.5917	8.29593e-55	5.97418e-53	0.983456	0.0276154
284207	ENSG00000176845	METRNL	1315.96	1.24029	0.114393	10.8424	2.16662e-27	4.4195e-26	536.682	0.723897	0.101447	7.13571	9.62876e-13	8.48829e-12	0.982095	0.365147
85455	ENSG00000140323	DISP2	141.342	1.50194	0.186488	8.0538	8.02594e-16	7.57254e-15	147.344	0.454702	0.161089	2.82267	0.00476256	0.0116059	0.97832	0.740508
57482	ENSG00000109265	KIAA1211	3392.47	0.928864	0.0993205	9.35219	8.58539e-21	1.20156e-19	2262.64	1.02684	0.0643208	15.9644	2.2629e-57	1.73771e-55	0.977853	0.0692808
2104	ENSG00000196482	ESRRG	88.8874	0.834761	0.235249	3.54841	0.00038756	0.00103224	53.856	1.11832	0.248594	4.4986	6.84036e-06	2.7792e-05	0.976542	0.200508
2868	ENSG00000125388	GRK4	32.7359	1.18153	0.342476	3.44997	0.000560657	0.00145084	34.2232	0.77142	0.28139	2.74146	0.00611667	0.0144917	0.976476	0.289993
57594	ENSG00000215271	HOMEZ	424.534	1.27308	0.132104	9.63697	5.58096e-22	8.31096e-21	391.308	0.679354	0.119385	5.69045	1.26704e-08	7.3875e-08	0.976217	0.419827
7220	ENSG00000144935	TRPC1	476.246	1.13049	0.150168	7.52812	5.14747e-14	4.20562e-13	634.59	0.821948	0.106904	7.68869	1.48654e-14	1.53613e-13	0.976217	0.21817
54884	ENSG00000042445	RETSAT	2437.28	1.22857	0.0903602	13.5964	4.20621e-42	1.66432e-40	3538.09	0.720897	0.0868877	8.29688	1.06877e-16	1.32092e-15	0.974735	0.358981
441733	ENSG00000259205	PRKXP1	678.794	0.428754	0.14201	3.01917	0.00253468	0.00584821	90.6765	1.51314	0.211915	7.14033	9.31062e-13	8.23471e-12	0.970947	0.766777
823	ENSG00000014216	CAPN1	3161.69	1.47043	0.0887345	16.5711	1.12661e-61	9.25477e-60	2972.52	0.466916	0.0696469	6.70405	2.02728e-11	1.57847e-10	0.968674	0.709593
10087	ENSG00000113163	COL4A3BP	3006.33	1.2055	0.0895888	13.4559	2.84382e-41	1.08273e-39	3070.43	0.73181	0.0877298	8.34163	7.32725e-17	9.13257e-16	0.968653	0.334946
83988	ENSG00000104490	NCALD	3082.82	0.903525	0.0835428	10.8151	2.91934e-27	5.90707e-26	2589.66	1.03331	0.092385	11.1849	4.83695e-29	1.26408e-27	0.968419	0.0917737
400644	ENSG00000266554	LINC01443	1108.49	1.18242	0.122366	9.66296	4.33166e-22	6.48248e-21	37.1774	0.748084	0.274847	2.72182	0.00649234	0.0152967	0.96525	0.30712
755	ENSG00000160226	C21orf2	108.431	1.03034	0.202269	5.09391	3.50746e-07	1.44063e-06	106.654	0.890943	0.206362	4.31738	1.57891e-05	6.09119e-05	0.960641	0.0985685
26232	ENSG00000116661	FBXO2	94.9047	1.32721	0.26935	4.92745	8.33087e-07	3.26728e-06	50.4216	0.593293	0.24016	2.47041	0.0134959	0.0293876	0.96025	0.518956
23077	ENSG00000005810	MYCBP2	8974.55	1.1514	0.110132	10.4546	1.39514e-25	2.56852e-24	8030.65	0.768096	0.0912027	8.42185	3.70583e-17	4.6984e-16	0.959746	0.271035
4644	ENSG00000197535	MYO5A	15122.5	1.12929	0.0737604	15.3102	6.53476e-53	3.67185e-51	19040.6	0.782531	0.0776009	10.084	6.49978e-24	1.29381e-22	0.955909	0.245194
1291	ENSG00000142156	COL6A1	654.178	1.14737	0.165076	6.95058	3.63788e-12	2.49599e-11	899.581	0.76133	0.086073	8.84517	9.1393e-19	1.30586e-17	0.954351	0.272973
100128750	ENSG00000254109	RBPMS-AS1	32.5693	0.769409	0.343142	2.24224	0.0249456	0.0464407	52.7288	1.1388	0.246208	4.62537	3.73933e-06	1.58318e-05	0.954105	0.261201
317749	ENSG00000187630	DHRS4L2	43.231	1.33303	0.29223	4.56158	5.07708e-06	1.78798e-05	45.253	0.573818	0.248738	2.30692	0.0210593	0.0435845	0.953424	0.536844
2997	ENSG00000104812	GYS1	5753.1	1.30845	0.0780992	16.7537	5.32181e-63	4.51906e-61	2979.73	0.598006	0.0762137	7.84644	4.28029e-15	4.63903e-14	0.953228	0.502359
7556	ENSG00000256223	ZNF10	177.185	0.93801	0.205161	4.57206	4.82949e-06	1.70635e-05	311.667	0.964886	0.125789	7.67068	1.71092e-14	1.7579e-13	0.951448	0.0190043
6648	ENSG00000112096	SOD2	4289.66	1.32157	0.0901358	14.662	1.12932e-48	5.47103e-47	2703.26	0.575874	0.0718866	8.01087	1.13899e-15	1.29238e-14	0.948722	0.527287
159091	ENSG00000156500	FAM122C	109.772	0.531805	0.209876	2.5339	0.0112801	0.0228336	139.344	1.36471	0.178971	7.62531	2.43443e-14	2.4607e-13	0.948258	0.588954
122953	ENSG00000140044	JDP2	58.161	1.11276	0.299901	3.71043	0.000206909	0.000578084	105.121	0.783688	0.185203	4.23151	2.32132e-05	8.70054e-05	0.948224	0.23269
80095	ENSG00000166704	ZNF606	87.2541	0.743287	0.257815	2.88303	0.00393872	0.00874725	35.8821	1.14101	0.284148	4.01553	5.93121e-05	0.000208286	0.942147	0.28123
3373	ENSG00000114378	HYAL1	43.168	1.04087	0.28955	3.59481	0.000324633	0.000876218	83.9778	0.839862	0.204379	4.10934	3.96784e-05	0.000143091	0.940368	0.142138
166614	ENSG00000170390	DCLK2	344.069	0.760123	0.142426	5.33696	9.4516e-08	4.16626e-07	131.313	1.12061	0.171595	6.53055	6.55298e-11	4.84168e-10	0.940366	0.254902
56977	ENSG00000173320	STOX2	886.374	0.930191	0.119949	7.75491	8.84055e-15	7.6796e-14	175.287	0.950337	0.161317	5.89111	3.83621e-09	2.37335e-08	0.940264	0.0142456
178	ENSG00000162688	AGL	5188.24	1.35189	0.0951114	14.2138	7.52273e-46	3.36408e-44	1701.23	0.526217	0.0752051	6.9971	2.61322e-12	2.20877e-11	0.939056	0.583842
754	ENSG00000183255	PTTG1IP	29914.8	0.841253	0.0809624	10.3907	2.73426e-25	4.97332e-24	25100.6	1.0315	0.0739336	13.9517	3.07171e-44	1.59522e-42	0.936376	0.134524
138050	ENSG00000165102	HGSNAT	1573.8	1.29155	0.113979	11.3315	9.16561e-30	2.12808e-28	1737.12	0.577313	0.0732557	7.88079	3.25306e-15	3.56626e-14	0.934432	0.505041
100329109	ENSG00000237580	GCSHP3	406.841	1.22069	0.14363	8.49883	1.91516e-17	2.03284e-16	131.326	0.647885	0.177034	3.65966	0.000252549	0.000797827	0.934287	0.405034
401431	ENSG00000204934	ATP6V0E2-AS1	158.854	1.28772	0.186584	6.90154	5.14428e-12	3.48212e-11	69.2858	0.579452	0.212492	2.72693	0.00639257	0.0150748	0.933585	0.500821
9454	ENSG00000051128	HOMER3	460.013	1.17082	0.18451	6.34556	2.21623e-10	1.29687e-09	566.545	0.694106	0.0971691	7.14329	9.11251e-13	8.0639e-12	0.932462	0.337086
79085	ENSG00000125648	SLC25A23	5362.47	0.938034	0.0803752	11.6707	1.79938e-31	4.50291e-30	4946.64	0.924308	0.0772137	11.9708	5.05538e-33	1.58438e-31	0.931171	0.00970581
101927279	ENSG00000231993	EP300-AS1	68.0741	0.776458	0.248729	3.1217	0.00179808	0.00426925	119.553	1.08393	0.179948	6.0236	1.70575e-09	1.08984e-08	0.930195	0.217418
285513	ENSG00000185477	GPRIN3	1075.28	0.703449	0.136701	5.14588	2.66273e-07	1.10965e-06	183.48	1.1516	0.148217	7.76969	7.86802e-15	8.30525e-14	0.927524	0.31689
957	ENSG00000187097	ENTPD5	512.283	1.24879	0.131785	9.47596	2.64306e-21	3.79752e-20	531.144	0.600623	0.0969591	6.1946	5.84315e-10	3.92686e-09	0.924706	0.458322
8658	ENSG00000173273	TNKS	4344.01	0.890152	0.0997829	8.92089	4.6254e-19	5.64268e-18	3430.24	0.95629	0.0694336	13.7727	3.719e-43	1.85412e-41	0.923221	0.0467665
541468	ENSG00000171357	LURAP1	366.5	0.964343	0.160728	5.99986	1.9749e-09	1.0533e-08	185.641	0.877061	0.161733	5.42288	5.86467e-08	3.17492e-07	0.920702	0.0617174
388115	ENSG00000188549	C15orf52	1738.25	0.795567	0.155867	5.10415	3.3228e-07	1.36701e-06	1098.5	1.04356	0.0826804	12.6216	1.60597e-36	5.86819e-35	0.919561	0.175355
659	ENSG00000204217	BMPR2	6899.67	0.57845	0.0889648	6.502	7.92575e-11	4.79959e-10	4244.91	1.25994	0.0889038	14.1719	1.36668e-45	7.40613e-44	0.919194	0.481886
256281	ENSG00000183828	NUDT14	171.544	1.05645	0.189166	5.58477	2.34016e-08	1.11336e-07	266.796	0.768667	0.12359	6.21949	4.98782e-10	3.37725e-09	0.912557	0.203492
84280	ENSG00000148925	BTBD10	6942.42	1.06327	0.0974656	10.9092	1.04161e-27	2.16264e-26	3001.28	0.761675	0.0724555	10.5123	7.58111e-26	1.69664e-24	0.912474	0.213262
4047	ENSG00000160285	LSS	3340.88	0.613087	0.0829911	7.38738	1.49754e-13	1.16617e-12	3896.38	1.20644	0.0815333	14.7969	1.53347e-49	9.51984e-48	0.909764	0.419565
11264	ENSG00000101417	PXMP4	109.552	1.15158	0.210259	5.47695	4.32709e-08	1.99524e-07	751.159	0.666781	0.0911407	7.31595	2.55563e-13	2.37573e-12	0.90918	0.342804
8925	ENSG00000103657	HERC1	9674.31	1.03516	0.102542	10.095	5.81397e-24	9.71029e-23	6276.78	0.781208	0.0638865	12.2281	2.20135e-34	7.44646e-33	0.908183	0.179569
203414	ENSG00000196741	LINC01560	54.0997	0.834557	0.275098	3.03367	0.00241597	0.00560169	55.3204	0.980875	0.236625	4.14527	3.39411e-05	0.000123584	0.907716	0.103462
23233	ENSG00000144036	EXOC6B	961.925	1.24948	0.0981281	12.7332	3.86626e-37	1.25405e-35	893.193	0.564891	0.0936807	6.02996	1.63999e-09	1.05156e-08	0.907188	0.484081
7259	ENSG00000189241	TSPYL1	3049.3	1.34198	0.0821681	16.3321	5.83475e-60	4.47676e-58	1460.23	0.460859	0.0767042	6.00827	1.87517e-09	1.19197e-08	0.901419	0.623045
11237	ENSG00000101236	RNF24	933.452	0.83373	0.120963	6.89245	5.48409e-12	3.70054e-11	660.408	0.966339	0.0968145	9.98134	1.8397e-23	3.56137e-22	0.900034	0.0937686
518	ENSG00000154518	ATP5G3	5155.05	1.29021	0.083186	15.5099	2.97277e-54	1.79018e-52	4376.66	0.509441	0.0626666	8.12939	4.31453e-16	5.07318e-15	0.899825	0.552086
51011	ENSG00000115042	FAHD2A	813.811	0.729872	0.129759	5.62485	1.85668e-08	8.93747e-08	499.806	1.06969	0.117867	9.07537	1.13296e-19	1.72532e-18	0.899779	0.240284
5037	ENSG00000089220	PEBP1	11144.9	0.895876	0.0741923	12.075	1.43086e-33	4.01251e-32	18518.6	0.901711	0.0821218	10.9802	4.76069e-28	1.20152e-26	0.898793	0.00412588
80150	ENSG00000162174	ASRGL1	616.279	0.992848	0.110013	9.02481	1.80008e-19	2.26546e-18	232.53	0.804214	0.140194	5.73645	9.66798e-09	5.73811e-08	0.898531	0.133384
65250	ENSG00000197603	C5orf42	2560.61	0.987633	0.0982292	10.0544	8.78819e-24	1.45053e-22	2277.66	0.808284	0.100926	8.00867	1.15959e-15	1.3139e-14	0.897958	0.126819
5160	ENSG00000131828	PDHA1	8800.22	1.24453	0.0792463	15.7045	1.40827e-55	8.94371e-54	7411.26	0.549881	0.062891	8.74339	2.26211e-18	3.14618e-17	0.897203	0.491188
7586	ENSG00000106261	ZKSCAN1	6649.81	0.968929	0.136898	7.07775	1.46514e-12	1.05155e-11	7233.19	0.824761	0.0748014	11.026	2.86274e-28	7.25899e-27	0.896845	0.101942
858	ENSG00000105971	CAV2	1293.03	1.07272	0.0964398	11.1233	9.66835e-29	2.121e-27	1343.62	0.719043	0.087292	8.23721	1.76267e-16	2.14257e-15	0.895883	0.25009
146167	ENSG00000166558	SLC38A8	39.0627	1.13291	0.319582	3.54498	0.000392636	0.00104392	57.8531	0.657005	0.232956	2.82029	0.00479799	0.0116694	0.894959	0.336518
283927	ENSG00000140876	NUDT7	32.2402	1.04421	0.329377	3.17025	0.00152309	0.00366205	58.1624	0.744348	0.249737	2.98053	0.00287748	0.00735507	0.894277	0.212032
5147	ENSG00000156973	PDE6D	1221.19	0.857285	0.0916203	9.35693	8.20834e-21	1.15092e-19	966.976	0.930612	0.0946822	9.8288	8.46239e-23	1.57968e-21	0.893949	0.0518501
84327	ENSG00000132846	ZBED3	117.501	1.1047	0.208476	5.29893	1.16482e-07	5.07239e-07	58.9376	0.667399	0.226324	2.94887	0.0031894	0.0080734	0.886051	0.309221
51151	ENSG00000164175	SLC45A2	17950.8	0.699178	0.0866023	8.07344	6.83459e-16	6.48085e-15	6831.74	1.07274	0.0955301	11.2293	2.92757e-29	7.80188e-28	0.885958	0.264146
101927612	ENSG00000245149	RNF139-AS1	42.4726	0.833517	0.328426	2.53791	0.0111515	0.0225976	45.1445	0.937406	0.257305	3.64318	0.000269292	0.0008461	0.885462	0.0734612
54954	ENSG00000184083	FAM120C	448.726	0.906184	0.127021	7.13412	9.7408e-13	7.11611e-12	559.87	0.862063	0.103539	8.326	8.36229e-17	1.03907e-15	0.884124	0.0311982
64506	ENSG00000214575	CPEB1	762.736	1.13101	0.100555	11.2477	2.37696e-29	5.39455e-28	536.563	0.635043	0.100855	6.29662	3.04208e-10	2.09837e-09	0.883026	0.3507
114876	ENSG00000141447	OSBPL1A	4634.91	0.957481	0.0840708	11.389	4.74505e-30	1.1224e-28	4026.52	0.802093	0.06428	12.4781	9.82949e-36	3.4927e-34	0.879787	0.109876
138311	ENSG00000165716	FAM69B	5069.12	0.914838	0.110563	8.27438	1.29129e-16	1.29001e-15	937.832	0.843035	0.0812612	10.3744	3.24281e-25	6.98714e-24	0.878936	0.0507721
2752	ENSG00000135821	GLUL	23333.6	0.896984	0.0754841	11.8831	1.4493e-32	3.84995e-31	4343.34	0.855909	0.0771395	11.0956	1.31788e-28	3.37872e-27	0.876446	0.0290445
64081	ENSG00000108187	PBLD	215.837	1.07432	0.1513	7.10058	1.24236e-12	8.98915e-12	73.5391	0.670594	0.213256	3.14454	0.00166346	0.00448545	0.872456	0.285476
9935	ENSG00000204103	MAFB	261.624	0.543833	0.183578	2.96242	0.00305235	0.0069357	168.702	1.19848	0.160446	7.46966	8.04027e-14	7.76842e-13	0.871155	0.462903
55260	ENSG00000161558	TMEM143	328.281	0.897604	0.148552	6.04235	1.51884e-09	8.22252e-09	190.076	0.84234	0.152276	5.53166	3.17205e-08	1.76318e-07	0.869972	0.0390774
64900	ENSG00000132793	LPIN3	933.206	0.794122	0.158477	5.01095	5.41624e-07	2.17383e-06	1599.24	0.943742	0.0773607	12.1992	3.13755e-34	1.05472e-32	0.868932	0.105797
222696	ENSG00000187987	ZSCAN23	152.163	0.632221	0.201088	3.144	0.00166653	0.00397815	111.314	1.10226	0.176969	6.22857	4.70718e-10	3.1939e-09	0.867242	0.332369
200420	ENSG00000163016	ALMS1P	200.268	0.738075	0.174904	4.2199	2.44413e-05	7.81202e-05	236.401	0.994833	0.149854	6.63867	3.16524e-11	2.41234e-10	0.866454	0.181556
10263	ENSG00000167797	CDK2AP2	720.415	0.672249	0.125534	5.35511	8.55029e-08	3.79107e-07	502.177	1.05861	0.10609	9.97843	1.89446e-23	3.66301e-22	0.86543	0.273198
6867	ENSG00000147526	TACC1	11469.5	0.85393	0.0801258	10.6574	1.61093e-26	3.12971e-25	12158.3	0.873366	0.0776208	11.2517	2.27156e-29	6.13434e-28	0.863648	0.0137439
81889	ENSG00000180185	FAHD1	1327.64	0.956397	0.101154	9.45486	3.23446e-21	4.62087e-20	1400.6	0.770196	0.0772648	9.96826	2.09878e-23	4.05322e-22	0.863297	0.131664
2241	ENSG00000151422	FER	1892.26	1.0276	0.0951811	10.7962	3.5858e-27	7.20737e-26	1811.12	0.696374	0.0892732	7.80049	6.1669e-15	6.57383e-14	0.861986	0.23421
25932	ENSG00000169504	CLIC4	11277.7	0.752134	0.0971994	7.73806	1.00946e-14	8.73027e-14	7132.69	0.971341	0.0674837	14.3937	5.66648e-47	3.24431e-45	0.861738	0.155003
79633	ENSG00000196159	FAT4	298.996	0.765168	0.165879	4.61281	3.97255e-06	1.42321e-05	67.5168	0.956903	0.240765	3.97443	7.05493e-05	0.000245198	0.861035	0.135577
260425	ENSG00000081026	MAGI3	1327.99	0.783586	0.103669	7.55853	4.0764e-14	3.35593e-13	565.581	0.936024	0.106988	8.74883	2.15571e-18	3.00076e-17	0.859805	0.10779
23510	ENSG00000180901	KCTD2	1228.76	1.10095	0.0968162	11.3715	5.79697e-30	1.36269e-28	1352.13	0.616092	0.0849209	7.25489	4.01979e-13	3.67358e-12	0.85852	0.342845
79940	ENSG00000233237	LINC00472	166.594	0.662571	0.202756	3.26782	0.0010838	0.00266584	265.532	1.05236	0.154743	6.80068	1.04127e-11	8.36472e-11	0.857464	0.275621
5909	ENSG00000076864	RAP1GAP	967.418	1.00057	0.120985	8.27019	1.3375e-16	1.33441e-15	182.808	0.71398	0.146768	4.86469	1.14637e-06	5.21904e-06	0.857274	0.202648
28996	ENSG00000064393	HIPK2	15914.9	0.579029	0.116698	4.96176	6.98574e-07	2.76775e-06	13792.3	1.12795	0.0855776	13.1805	1.13684e-39	4.80944e-38	0.853491	0.388148
5213	ENSG00000152556	PFKM	6139.97	1.23846	0.0885109	13.9922	1.7399e-44	7.42897e-43	5680.6	0.46815	0.062974	7.43401	1.05352e-13	1.01007e-12	0.853305	0.544692
400027		LINC00938	250.823	0.703267	0.149274	4.71126	2.46191e-06	9.06939e-06	280.161	1.0025	0.13051	7.68146	1.57285e-14	1.61912e-13	0.852886	0.211593
83986	ENSG00000167930	ITFG3	2101.02	1.17514	0.0942435	12.4692	1.09968e-35	3.38527e-34	1525.73	0.53058	0.0751232	7.06279	1.63187e-12	1.40645e-11	0.852859	0.455771
161357	ENSG00000139915	MDGA2	1250.48	0.878781	0.107558	8.17033	3.0756e-16	2.99148e-15	1184.78	0.815767	0.0885193	9.2157	3.09252e-20	4.88859e-19	0.847274	0.0445572
64121	ENSG00000116954	RRAGC	3261.95	1.00208	0.0843394	11.8815	1.47741e-32	3.91773e-31	2152.34	0.683981	0.071839	9.52103	1.71479e-21	2.92471e-20	0.843029	0.224928
100505783	ENSG00000223891	OSER1-AS1	94.0486	0.577154	0.214885	2.68588	0.00723395	0.0152562	93.325	1.10828	0.213172	5.19899	2.0037e-07	1.0092e-06	0.842716	0.375562
55356	ENSG00000163393	SLC22A15	86.6471	0.83324	0.236066	3.52969	0.000416043	0.00110073	83.7103	0.850164	0.206424	4.11853	3.81298e-05	0.000137783	0.841702	0.0119667
55577	ENSG00000124357	NAGK	754.157	0.942791	0.118522	7.95456	1.79773e-15	1.64783e-14	1161.19	0.738881	0.0852922	8.66294	4.59759e-18	6.22345e-17	0.840836	0.144186
54472	ENSG00000078902	TOLLIP	1926.87	1.06187	0.0998152	10.6384	1.97531e-26	3.83271e-25	2099.98	0.616519	0.0783215	7.87164	3.50028e-15	3.82692e-14	0.839195	0.314913
9517	ENSG00000100596	SPTLC2	2146.45	1.00544	0.0951958	10.5618	4.47969e-26	8.48502e-25	2038.51	0.668593	0.0767149	8.7153	2.89998e-18	3.98883e-17	0.837016	0.238186
83938	ENSG00000148655	C10orf11	94.8637	0.661833	0.215179	3.07573	0.00209989	0.0049232	148.1	1.01198	0.159716	6.33614	2.35593e-10	1.64539e-09	0.836908	0.247593
144363	ENSG00000205707	LYRM5	571.574	1.00267	0.111579	8.98619	2.55953e-19	3.1659e-18	396.956	0.668894	0.117572	5.68924	1.27607e-08	7.43746e-08	0.835783	0.236017
84466	ENSG00000145794	MEGF10	580.369	0.71114	0.155996	4.55872	5.14662e-06	1.81078e-05	1178.04	0.951491	0.0867916	10.9629	5.76017e-28	1.43809e-26	0.831315	0.169953
92999	ENSG00000114853	ZBTB47	584.459	0.62414	0.131136	4.7595	1.94075e-06	7.22169e-06	95.6349	1.03465	0.193864	5.33697	9.45128e-08	4.97367e-07	0.829394	0.290273
4259	ENSG00000143198	MGST3	1862.88	1.03625	0.0907475	11.419	3.35996e-30	7.9852e-29	1605.54	0.621254	0.0767239	8.09726	5.62103e-16	6.57125e-15	0.828751	0.293445
5165	ENSG00000067992	PDK3	2201.31	0.854009	0.115175	7.41491	1.21705e-13	9.56614e-13	2771.94	0.792978	0.0776938	10.2065	1.85517e-24	3.7858e-23	0.823493	0.0431555
3717	ENSG00000096968	JAK2	1021.17	1.02183	0.0988384	10.3384	4.72514e-25	8.45213e-24	1360.6	0.622028	0.186038	3.34355	0.000827149	0.00236222	0.821928	0.282701
54629	ENSG00000128923	FAM63B	3598.9	0.948059	0.0929067	10.2044	1.89441e-24	3.25386e-23	864.645	0.688437	0.124314	5.53791	3.0611e-08	1.70502e-07	0.818248	0.183581
4233	ENSG00000105976	MET	29304.3	0.643866	0.0899971	7.1543	8.41003e-13	6.18577e-12	40782.3	0.990228	0.0717155	13.8077	2.28929e-43	1.15197e-41	0.817047	0.244915
4084	ENSG00000059728	MXD1	301.781	0.916301	0.174141	5.26185	1.42616e-07	6.14319e-07	229.094	0.715404	0.133581	5.35558	8.52846e-08	4.52923e-07	0.815852	0.142056
115196	ENSG00000172006	ZNF554	110.151	0.70348	0.194554	3.61587	0.000299345	0.000812171	43.0121	0.926127	0.276398	3.3507	0.000806083	0.00230759	0.814804	0.157435
34	ENSG00000117054	ACADM	5644.02	0.952479	0.10437	9.12596	7.11053e-20	9.20957e-19	5143.82	0.67501	0.0743673	9.07671	1.11908e-19	1.70738e-18	0.813744	0.1962
1337	ENSG00000111775	COX6A1	1193.87	0.991455	0.101434	9.77441	1.44996e-22	2.22499e-21	1165.99	0.635836	0.0789742	8.05118	8.19983e-16	9.4631e-15	0.813645	0.251461
347735	ENSG00000168528	SERINC2	385.551	0.922646	0.172214	5.35756	8.43514e-08	3.74221e-07	614.786	0.702838	0.108282	6.49081	8.53785e-11	6.23148e-10	0.812742	0.155428
80207	ENSG00000125741	OPA3	1545.28	1.14867	0.0852854	13.4686	2.39395e-41	9.20725e-40	1597.9	0.473898	0.0754163	6.28376	3.30475e-10	2.27086e-09	0.811286	0.477139
10439	ENSG00000130558	OLFM1	94.9965	1.10156	0.226179	4.87031	1.11426e-06	4.29535e-06	1321.72	0.516252	0.0796572	6.48091	9.11681e-11	6.63015e-10	0.808907	0.413877
9240	ENSG00000176903	PNMA1	1543.04	1.05402	0.112854	9.33975	9.65642e-21	1.34522e-19	1232.61	0.555559	0.0785276	7.0747	1.49776e-12	1.29637e-11	0.804792	0.352469
29965	ENSG00000089486	CDIP1	2465.26	0.986854	0.0830784	11.8786	1.52945e-32	4.04156e-31	348.363	0.621807	0.11751	5.29151	1.21313e-07	6.29807e-07	0.80433	0.258127
140885	ENSG00000198053	SIRPA	17419.9	1.13539	0.0912441	12.4434	1.51887e-35	4.59155e-34	13918.5	0.472382	0.0640211	7.37853	1.60052e-13	1.51479e-12	0.803884	0.468816
10481	ENSG00000159184	HOXB13	177.93	1.08168	0.176882	6.11527	9.63936e-10	5.30007e-09	212.253	0.509108	0.142203	3.58014	0.000343409	0.00105845	0.795396	0.404873
51161	ENSG00000088543	C3orf18	177.877	0.932202	0.197874	4.71109	2.46392e-06	9.07459e-06	244.448	0.658351	0.129621	5.07903	3.79358e-07	1.84199e-06	0.795277	0.193642
83606	ENSG00000138867	GUCD1	3001.97	1.1073	0.0796724	13.8982	6.49844e-44	2.69846e-42	3243.95	0.475276	0.0661881	7.18068	6.93659e-13	6.21302e-12	0.791288	0.446909
8659	ENSG00000159423	ALDH4A1	507.271	0.900342	0.122852	7.32865	2.32478e-13	1.78461e-12	273.022	0.677044	0.125261	5.40507	6.47842e-08	3.48969e-07	0.788693	0.157896
7381	ENSG00000156467	UQCRB	11326.3	0.91818	0.107128	8.57088	1.02694e-17	1.12154e-16	13443.8	0.658766	0.0780907	8.4359	3.28652e-17	4.17986e-16	0.788473	0.183434
10039	ENSG00000041880	PARP3	625.987	1.00352	0.11462	8.75519	2.0376e-18	2.35821e-17	423.127	0.57212	0.104511	5.47425	4.3938e-08	2.4076e-07	0.787818	0.305043
89795	ENSG00000067798	NAV3	327.609	1.03939	0.135661	7.66165	1.83554e-14	1.55692e-13	1742.26	0.527645	0.075466	6.99183	2.7133e-12	2.29096e-11	0.783517	0.361857
55328	ENSG00000184719	RNLS	2174.83	0.408173	0.109754	3.71898	0.000200026	0.000559888	1278.04	1.1571	0.0780315	14.8286	9.57077e-50	5.98746e-48	0.782636	0.529571
10397	ENSG00000104419	NDRG1	225.396	0.968703	0.177964	5.44324	5.23188e-08	2.37834e-07	276.121	0.588591	0.125868	4.67624	2.92178e-06	1.25808e-05	0.778647	0.268779
6926	ENSG00000135111	TBX3	4120.57	1.07291	0.103639	10.3524	4.08257e-25	7.36373e-24	404.244	0.482716	0.110364	4.37387	1.22065e-05	4.80285e-05	0.777811	0.417327
100506115	ENSG00000224397	LINC01272	242.11	0.434763	0.153397	2.83423	0.00459357	0.0100889	788.581	1.11881	0.0971755	11.5133	1.13126e-30	3.23848e-29	0.776784	0.483691
56895	ENSG00000026652	AGPAT4	595.038	0.574041	0.147592	3.88937	0.000100503	0.000294173	149.371	0.976588	0.164272	5.94496	2.76521e-09	1.73527e-08	0.775314	0.284644
4935	ENSG00000101850	GPR143	2898.76	0.612633	0.0795984	7.69654	1.39798e-14	1.19516e-13	2212.78	0.937779	0.0734759	12.7631	2.63556e-37	9.97758e-36	0.775206	0.229913
100272147	ENSG00000182712	CMC4	76.0018	0.687522	0.229805	2.99176	0.00277374	0.00635229	92.5405	0.86049	0.195868	4.39322	1.11686e-05	4.41916e-05	0.774006	0.122307
195827	ENSG00000158122	AAED1	358.444	1.03501	0.126038	8.21188	2.17748e-16	2.13997e-15	388.323	0.512461	0.105617	4.85205	1.22189e-06	5.53798e-06	0.773736	0.3695
79955	ENSG00000186862	PDZD7	54.6753	0.746117	0.278932	2.67491	0.00747489	0.0157074	57.7876	0.800442	0.246644	3.24533	0.00117315	0.00324876	0.77328	0.0384132
10994	ENSG00000105135	ILVBL	1816.22	0.817412	0.0918807	8.89645	5.76591e-19	6.98332e-18	980.648	0.728761	0.0929909	7.83691	4.61779e-15	4.9948e-14	0.773087	0.0626858
23033	ENSG00000083097	DOPEY1	673.471	0.660851	0.108325	6.10062	1.0566e-09	5.79063e-09	545.917	0.881143	0.103074	8.54861	1.24579e-17	1.63843e-16	0.770997	0.15577
3956	ENSG00000100097	LGALS1	258.229	1.02963	0.169375	6.07899	1.20945e-09	6.59243e-09	2184.09	0.509007	0.171487	2.9682	0.00299547	0.00763214	0.769318	0.368136
6919	ENSG00000171703	TCEA2	63.4756	0.920006	0.263219	3.49521	0.000473685	0.00124	87.8123	0.618335	0.194975	3.17135	0.00151731	0.00412017	0.76917	0.213314
1318	ENSG00000136867	SLC31A2	265.408	1.092	0.141535	7.71543	1.20574e-14	1.03491e-13	196.544	0.443714	0.14284	3.10636	0.00189405	0.00504261	0.767859	0.458411
200895	ENSG00000178700	DHFRL1	941.384	0.843348	0.105297	8.0092	1.1546e-15	1.07594e-14	813.586	0.68837	0.092087	7.47521	7.70801e-14	7.46967e-13	0.765859	0.109586
197187	ENSG00000260630	SNAI3-AS1	61.6369	0.614851	0.260226	2.36276	0.0181396	0.0349054	145.998	0.916811	0.159652	5.74255	9.32614e-09	5.54945e-08	0.765831	0.213517
1431	ENSG00000062485	CS	11701.4	1.00655	0.0735037	13.6939	1.1036e-42	4.41295e-41	11847.2	0.524814	0.0631376	8.31224	9.39128e-17	1.16603e-15	0.765685	0.340642
4685	ENSG00000154654	NCAM2	1836.91	0.619496	0.145473	4.25851	2.05797e-05	6.6523e-05	380.019	0.910157	0.113468	8.02129	1.04644e-15	1.19321e-14	0.764827	0.205529
1759	ENSG00000106976	DNM1	262.189	0.737672	0.20079	3.67385	0.000238928	0.000661306	111.007	0.79182	0.187338	4.2267	2.37143e-05	8.87397e-05	0.764746	0.0382885
400566	ENSG00000187624	C17orf97	109.726	0.676884	0.202673	3.33978	0.000838458	0.00210485	177.38	0.850075	0.159988	5.31338	1.07613e-07	5.62466e-07	0.76348	0.122465
10382	ENSG00000104833	TUBB4A	28155	0.998404	0.132912	7.51175	5.83423e-14	4.75131e-13	13967.4	0.527846	0.077322	6.8266	8.69482e-12	7.02654e-11	0.763125	0.332735
5236	ENSG00000079739	PGM1	4175.44	1.07574	0.0801686	13.4185	4.71336e-41	1.78552e-39	3244.2	0.449943	0.0613496	7.33407	2.2326e-13	2.08741e-12	0.762842	0.442506
100507321	ENSG00000260565	ERVK13-1	498.556	0.61479	0.121914	5.04282	4.58719e-07	1.86035e-06	377.191	0.908574	0.119574	7.59845	2.99699e-14	3.00311e-13	0.761682	0.207736
100134229	ENSG00000260231	JHDM1D-AS1	121.449	0.809732	0.241298	3.35573	0.000791546	0.00199937	144.934	0.711862	0.166492	4.27565	1.90578e-05	7.25207e-05	0.760797	0.0692044
79739	ENSG00000137941	TTLL7	2367.18	0.704487	0.117257	6.00804	1.87778e-09	1.00541e-08	1266.42	0.816349	0.0878227	9.29543	1.46612e-20	2.35436e-19	0.760418	0.0790984
162993	ENSG00000196605	ZNF846	72.1974	0.841104	0.243038	3.46079	0.000538595	0.00139757	59.4615	0.679163	0.231417	2.93481	0.00333755	0.00840901	0.760133	0.11451
10809	ENSG00000214530	STARD10	923.355	0.656842	0.119112	5.51448	3.49817e-08	1.63244e-07	1141.48	0.86259	0.0772836	11.1614	6.30207e-29	1.63642e-27	0.759716	0.145486
9139	ENSG00000078699	CBFA2T2	1834.58	0.759299	0.101309	7.4949	6.6348e-14	5.36284e-13	1525.68	0.758344	0.0738109	10.2742	9.21497e-25	1.92658e-23	0.758822	0.000674836
60558	ENSG00000151806	GUF1	3886.06	1.0428	0.0976769	10.676	1.31786e-26	2.5769e-25	2915.05	0.474286	0.0719606	6.59092	4.3711e-11	3.27742e-10	0.758544	0.402001
4190	ENSG00000014641	MDH1	15052.8	1.08057	0.0765595	14.1142	3.10603e-45	1.35687e-43	8240.7	0.435786	0.0594508	7.3302	2.29809e-13	2.14492e-12	0.75818	0.455934
10916	ENSG00000102316	MAGED2	2590.26	1.08544	0.0906867	11.9691	5.15634e-33	1.40198e-31	2411.17	0.426705	0.0656029	6.50435	7.80287e-11	5.71564e-10	0.756073	0.465797
84105	ENSG00000132570	PCBD2	73.2835	0.976578	0.249447	3.91498	9.04132e-05	0.000266059	98.9548	0.531785	0.183403	2.89955	0.00373702	0.00931409	0.754181	0.314516
199745	ENSG00000161277	THAP8	46.7516	0.802261	0.294119	2.72767	0.0063783	0.0135939	147.299	0.700907	0.158304	4.42761	9.5283e-06	3.79423e-05	0.751584	0.0716684
286262	ENSG00000176058	TPRN	782.684	1.0741	0.102721	10.4566	1.36716e-25	2.52007e-24	383.836	0.427592	0.111514	3.83443	0.000125856	0.000420897	0.750848	0.457153
84162	ENSG00000138688	KIAA1109	2930.55	0.762317	0.124952	6.10089	1.05478e-09	5.78274e-09	3172.8	0.738518	0.0939177	7.86346	3.73674e-15	4.06898e-14	0.750417	0.0168282
137964	ENSG00000158669	GPAT4	11676.7	0.671144	0.0968262	6.93143	4.16601e-12	2.83901e-11	22012.5	0.826861	0.0622841	13.2756	3.20538e-40	1.39241e-38	0.749003	0.110108
728609	ENSG00000185986	SDHAP3	222.873	0.660695	0.155244	4.25585	2.08258e-05	6.72756e-05	169.681	0.83303	0.147426	5.65048	1.60002e-08	9.2359e-08	0.746863	0.121859
3628	ENSG00000151689	INPP1	733.831	0.875988	0.103902	8.43089	3.4306e-17	3.56382e-16	345.605	0.616215	0.118078	5.2187	1.80181e-07	9.13763e-07	0.746102	0.183687
50640	ENSG00000135241	PNPLA8	1717.68	0.909888	0.0917038	9.92204	3.33874e-23	5.30095e-22	2421.99	0.579937	0.0673086	8.61609	6.9278e-18	9.26164e-17	0.744913	0.233311
29088	ENSG00000137547	MRPL15	2591.24	0.988954	0.107564	9.19412	3.7807e-20	4.97347e-19	3127	0.494843	0.0605273	8.17553	2.94559e-16	3.53537e-15	0.741898	0.349389
400410	ENSG00000180953	ST20	353.348	0.792903	0.159975	4.95643	7.18002e-07	2.84174e-06	234.438	0.689364	0.134213	5.13636	2.80107e-07	1.38371e-06	0.741134	0.0732133
26030	ENSG00000126822	PLEKHG3	2156.99	0.663136	0.0859816	7.71253	1.23348e-14	1.05812e-13	1507.28	0.818772	0.0870425	9.40657	5.12578e-21	8.42323e-20	0.740954	0.110051
1351	ENSG00000176340	COX8A	3016.83	0.896122	0.0866561	10.3411	4.59104e-25	8.22198e-24	2166.76	0.583867	0.0829823	7.03604	1.97782e-12	1.68929e-11	0.739994	0.220798
57683	ENSG00000204186	ZDBF2	1479.53	1.053	0.101789	10.3449	4.41158e-25	7.92877e-24	1069.49	0.426498	0.0978956	4.35666	1.32062e-05	5.17111e-05	0.739748	0.443002
160518	ENSG00000170456	DENND5B	1646.12	0.871954	0.0855005	10.1982	2.01914e-24	3.46416e-23	1716.05	0.60592	0.0710924	8.52299	1.55487e-17	2.03174e-16	0.738937	0.188114
219902	ENSG00000181264	TMEM136	335.631	0.980235	0.14786	6.6295	3.36829e-11	2.11603e-10	264.42	0.496388	0.123192	4.02938	5.59248e-05	0.000197289	0.738311	0.342131
8495	ENSG00000166387	PPFIBP2	509.912	0.676757	0.129645	5.2201	1.78828e-07	7.60761e-07	1293.02	0.794054	0.0824003	9.63654	5.60428e-22	9.96775e-21	0.735406	0.0829414
51277	ENSG00000115137	DNAJC27	324.508	0.625451	0.196787	3.17832	0.00148132	0.00356815	335.995	0.842647	0.119827	7.03221	2.03286e-12	1.73269e-11	0.734049	0.153581
66008	ENSG00000115993	TRAK2	12637.3	0.704397	0.0761809	9.24638	2.32234e-20	3.10639e-19	8674.75	0.761745	0.0721422	10.5589	4.61887e-26	1.06005e-24	0.733071	0.040551
84317	ENSG00000136710	CCDC115	511.534	0.917844	0.122461	7.495	6.62999e-14	5.36181e-13	540.381	0.547066	0.0981882	5.5716	2.52407e-08	1.42401e-07	0.732455	0.26218
64288	ENSG00000235109	ZSCAN31	73.7222	0.682311	0.228298	2.98868	0.00280183	0.00640885	74.6228	0.782456	0.213005	3.67342	0.000239324	0.000759453	0.732383	0.0708127
56922	ENSG00000078070	MCCC1	1955.94	0.86522	0.0979001	8.83779	9.76337e-19	1.15835e-17	1214.27	0.598621	0.0769535	7.77901	7.30956e-15	7.74097e-14	0.731921	0.188514
4594	ENSG00000146085	MUT	3737.73	0.714193	0.0821559	8.69314	3.52556e-18	4.02484e-17	1611.61	0.739036	0.0776063	9.52288	1.68443e-21	2.87899e-20	0.726614	0.0175666
6000	ENSG00000182901	RGS7	417.433	0.817054	0.136121	6.00242	1.94403e-09	1.03757e-08	47.9747	0.635941	0.259387	2.45171	0.0142179	0.0307656	0.726498	0.128067
26039	ENSG00000184402	SS18L1	6561.36	0.55533	0.130042	4.2704	1.95122e-05	6.32753e-05	2400.06	0.896918	0.0868145	10.3314	5.0797e-25	1.08298e-23	0.726124	0.241539
100507419	ENSG00000261971	MMP25-AS1	49.4705	0.661305	0.279967	2.36209	0.0181724	0.0349594	65.3159	0.786754	0.230434	3.41423	0.000639632	0.00186704	0.724029	0.0887056
23412	ENSG00000148444	COMMD3	164.28	0.55554	0.175192	3.17104	0.00151892	0.00365349	189.112	0.886363	0.151729	5.84175	5.16559e-09	3.16439e-08	0.720952	0.233927
4700	ENSG00000184983	NDUFA6	2979.21	0.992916	0.0859572	11.5513	7.27308e-31	1.78462e-29	2296.89	0.445576	0.0646603	6.89102	5.53933e-12	4.55603e-11	0.719246	0.387028
5465	ENSG00000186951	PPARA	2961.8	0.867195	0.150276	5.77069	7.89486e-09	3.96712e-08	1211.28	0.570188	0.0879583	6.48248	9.0229e-11	6.5648e-10	0.718691	0.210016
10013	ENSG00000094631	HDAC6	766.84	0.791677	0.138849	5.7017	1.18616e-08	5.84953e-08	1005.41	0.645652	0.0820765	7.86647	3.64783e-15	3.97751e-14	0.718665	0.103255
256051	ENSG00000121406	ZNF549	743.226	0.982549	0.109206	8.99723	2.31492e-19	2.87275e-18	496.064	0.453105	0.104985	4.31589	1.58959e-05	6.12802e-05	0.717827	0.374373
64975	ENSG00000182154	MRPL41	440.088	1.0276	0.13953	7.36473	1.7751e-13	1.37452e-12	494.412	0.407714	0.112681	3.6183	0.000296548	0.000923862	0.717658	0.438327
23274	ENSG00000038532	CLEC16A	3110.16	0.963355	0.0819993	11.7483	7.20335e-32	1.84228e-30	1805.77	0.471718	0.0704874	6.69223	2.19794e-11	1.70073e-10	0.717536	0.34764
23408	ENSG00000124523	SIRT5	723.433	0.675574	0.107137	6.30567	2.86943e-10	1.66238e-09	593.599	0.756866	0.101292	7.47213	7.89084e-14	7.63315e-13	0.71622	0.0574821
412	ENSG00000101846	STS	83.745	0.737315	0.226701	3.25237	0.00114445	0.00280136	1416.38	0.693699	0.1012	6.85471	7.14584e-12	5.81537e-11	0.715507	0.0308415
203523	ENSG00000173275	ZNF449	532.815	0.622957	0.11055	5.63508	1.7498e-08	8.45531e-08	1070.79	0.804826	0.207216	3.884	0.000102753	0.000349183	0.713892	0.128601
374291	ENSG00000115286	NDUFS7	1105.33	0.92992	0.115814	8.02942	9.79378e-16	9.17749e-15	713.077	0.497094	0.0986972	5.03655	4.73989e-07	2.27355e-06	0.713507	0.306054
27241	ENSG00000122507	BBS9	539.692	0.562629	0.112195	5.01476	5.3101e-07	2.1335e-06	828.604	0.862709	0.0887677	9.71873	2.50901e-22	4.56269e-21	0.712669	0.212188
7289	ENSG00000078246	TULP3	1455.17	0.537901	0.0880696	6.10768	1.01087e-09	5.55207e-09	1421.55	0.886918	0.0985778	8.99714	2.31683e-19	3.47267e-18	0.71241	0.246792
399687	ENSG00000196535	MYO18A	3561.36	0.875649	0.0870206	10.0626	8.08753e-24	1.34038e-22	3932.7	0.54781	0.0603251	9.08097	1.07613e-19	1.64496e-18	0.71173	0.231817
91663	ENSG00000179820	MYADM	49.7589	0.808304	0.274959	2.93972	0.00328506	0.00741703	1617.06	0.6146	0.105625	5.81873	5.92979e-09	3.60662e-08	0.711452	0.136969
64762	ENSG00000141441	GAREM	839.921	0.646226	0.0965834	6.69086	2.21861e-11	1.41974e-10	1335.55	0.775932	0.0867226	8.94728	3.64336e-19	5.37155e-18	0.711079	0.0917157
388566	ENSG00000197016	ZNF470	258.486	0.850025	0.140889	6.03328	1.60667e-09	8.67315e-09	534.188	0.569615	0.108509	5.24949	1.52519e-07	7.80562e-07	0.70982	0.198279
285033	ENSG00000204685	STARD7-AS1	149.148	0.902359	0.172114	5.24279	1.58166e-07	6.77822e-07	67.8263	0.514507	0.224201	2.29485	0.0217419	0.0447913	0.708433	0.274252
79685	ENSG00000164576	SAP30L	410.404	0.909361	0.122581	7.41843	1.18515e-13	9.33e-13	598.815	0.505644	0.0925138	5.4656	4.61347e-08	2.5237e-07	0.707502	0.285471
161	ENSG00000183020	AP2A2	2293.25	0.917143	0.0809769	11.326	9.75852e-30	2.25881e-28	2268.7	0.493255	0.0731137	6.74642	1.51543e-11	1.19661e-10	0.705199	0.299734
57514	ENSG00000031081	ARHGAP31	3128.48	0.679217	0.0945766	7.18166	6.88705e-13	5.10283e-12	3744.9	0.731151	0.069302	10.5502	5.06794e-26	1.15819e-24	0.705184	0.036723
2800	ENSG00000136935	GOLGA1	1540.12	0.892447	0.0889671	10.0312	1.11152e-23	1.81825e-22	2276.82	0.514893	0.0696277	7.39495	1.4146e-13	1.3459e-12	0.70367	0.266971
1244	ENSG00000023839	ABCC2	8930.77	0.599739	0.0722295	8.30325	1.01305e-16	1.02013e-15	7966.32	0.806359	0.0638537	12.6282	1.4756e-36	5.42158e-35	0.703049	0.146103
84752	ENSG00000237172	B3GNT9	38.0734	0.803156	0.337132	2.38232	0.017204	0.0333511	66.5767	0.602693	0.221827	2.71695	0.00658872	0.0155032	0.702925	0.141749
253943	ENSG00000185728	YTHDF3	7386.65	0.882771	0.10116	8.72646	2.62761e-18	3.02485e-17	7880.63	0.522878	0.0778162	6.7194	1.82477e-11	1.42766e-10	0.702825	0.254483
1738	ENSG00000091140	DLD	8590.76	0.972741	0.110862	8.77438	1.71854e-18	2.00121e-17	11097.4	0.430924	0.0652058	6.60868	3.87766e-11	2.92776e-10	0.701832	0.383122
38	ENSG00000075239	ACAT1	8078.6	0.823244	0.0952656	8.64157	5.54443e-18	6.19394e-17	4763.95	0.578736	0.0772358	7.49311	6.72609e-14	6.53766e-13	0.70099	0.172893
57194	ENSG00000206190	ATP10A	3373.91	0.915694	0.0992426	9.22682	2.78796e-20	3.69973e-19	346.234	0.484829	0.114661	4.22837	2.35395e-05	8.81264e-05	0.700261	0.304667
6319	ENSG00000099194	SCD	48067.1	0.672354	0.087921	7.64725	2.05325e-14	1.73476e-13	108494	0.727003	0.0673915	10.7878	3.9323e-27	9.49553e-26	0.699679	0.038643
196951	ENSG00000166262	FAM227B	60.4081	0.591696	0.243588	2.42908	0.015137	0.0297099	34.6438	0.807441	0.287045	2.81295	0.00490898	0.011909	0.699569	0.152555
131408	ENSG00000175182	FAM131A	862.675	0.796817	0.133199	5.98216	2.20198e-09	1.17029e-08	259.399	0.602061	0.127798	4.71102	2.46483e-06	1.07244e-05	0.699439	0.137714
50617	ENSG00000105929	ATP6V0A4	942.078	0.94301	0.121521	7.76006	8.48914e-15	7.38707e-14	4152.61	0.455544	0.0784179	5.80919	6.27759e-09	3.7982e-08	0.699277	0.34469
5453	ENSG00000185668	POU3F1	836.313	0.48095	0.118163	4.07022	4.69688e-05	0.000144208	201.434	0.915551	0.138846	6.594	4.28144e-11	3.21614e-10	0.69825	0.307309
3728	ENSG00000173801	JUP	199.509	0.541414	0.191311	2.83002	0.00465455	0.010208	122.054	0.854325	0.186258	4.58679	4.50117e-06	1.87728e-05	0.697869	0.221262
5298	ENSG00000143393	PI4KB	4609.02	0.979092	0.0813228	12.0396	2.2007e-33	6.1372e-32	4364.02	0.416438	0.059813	6.96233	3.34697e-12	2.80844e-11	0.697765	0.397857
3157	ENSG00000112972	HMGCS1	7563.42	0.41109	0.142275	2.8894	0.00385977	0.00858999	7314.76	0.983304	0.0949194	10.3594	3.79489e-25	8.14419e-24	0.697197	0.404617
84614	ENSG00000185278	ZBTB37	269.522	0.701706	0.140297	5.00157	5.68665e-07	2.27331e-06	208.883	0.692264	0.145079	4.77163	1.82739e-06	8.0988e-06	0.696985	0.00667665
80031	ENSG00000137872	SEMA6D	6771.41	0.741903	0.0905062	8.19727	2.45917e-16	2.41052e-15	1044.2	0.64883	0.0981939	6.60764	3.90501e-11	2.94567e-10	0.695366	0.065813
54796	ENSG00000173068	BNC2	3384.45	0.685355	0.0804624	8.51771	1.62739e-17	1.74084e-16	2728.61	0.702659	0.0936338	7.50433	6.17425e-14	6.03925e-13	0.694007	0.0122357
1783	ENSG00000135720	DYNC1LI2	9624.36	0.697526	0.0888086	7.85426	4.02125e-15	3.58169e-14	12854.8	0.69007	0.0740621	9.31746	1.19164e-20	1.9212e-19	0.693798	0.00527225
55066	ENSG00000090857	PDPR	1746.1	0.776141	0.109283	7.10214	1.22837e-12	8.89642e-12	2311.07	0.610471	0.0767115	7.95801	1.74829e-15	1.95632e-14	0.693306	0.117146
83862	ENSG00000189077	TMEM120A	467.326	0.867958	0.131794	6.58574	4.52634e-11	2.80852e-10	1173.58	0.512859	0.0761981	6.73061	1.68957e-11	1.32894e-10	0.690409	0.251093
80317	ENSG00000189298	ZKSCAN3	482.573	0.942422	0.141872	6.64278	3.0782e-11	1.94186e-10	309.521	0.437948	0.135618	3.22928	0.00124103	0.00341862	0.690185	0.356718
221491	ENSG00000186577	C6orf1	559.144	0.768246	0.137735	5.5777	2.43724e-08	1.15809e-07	610.337	0.607432	0.104765	5.79805	6.70906e-09	4.04868e-08	0.687839	0.113713
1652	ENSG00000099977	DDT	1329.27	0.791352	0.155395	5.09252	3.53342e-07	1.4509e-06	1030.08	0.58323	0.116694	4.99795	5.79429e-07	2.74839e-06	0.687291	0.147165
57017	ENSG00000088682	COQ9	2582.5	0.94202	0.0835468	11.2754	1.73654e-29	3.96492e-28	2023.61	0.432092	0.0662852	6.51868	7.0928e-11	5.21673e-10	0.687056	0.360574
57617	ENSG00000104142	VPS18	3320	0.905477	0.0763759	11.8555	2.01443e-32	5.28614e-31	2861.73	0.467464	0.0684389	6.83038	8.46907e-12	6.85094e-11	0.68647	0.309722
64981	ENSG00000130312	MRPL34	2370.23	0.736726	0.112296	6.5606	5.3593e-11	3.29828e-10	1310.84	0.634975	0.104227	6.09222	1.11359e-09	7.25803e-09	0.68585	0.0719492
81856	ENSG00000213020	ZNF611	454.879	0.871032	0.121306	7.18043	6.94949e-13	5.14657e-12	467.673	0.500432	0.108899	4.59535	4.32014e-06	1.80602e-05	0.685732	0.262054
84503	ENSG00000189164	ZNF527	190.393	0.952392	0.160257	5.94292	2.79993e-09	1.4705e-08	232.164	0.417787	0.134029	3.11714	0.00182615	0.00487785	0.685089	0.378023
23641	ENSG00000182195	LDOC1	48.3795	0.939638	0.282606	3.3249	0.000884496	0.00220868	672.407	0.4294	0.103458	4.15048	3.31782e-05	0.000121024	0.684519	0.360793
5607	ENSG00000137764	MAP2K5	1868.52	0.838677	0.110426	7.59489	3.08044e-14	2.5611e-13	747.402	0.528742	0.0845911	6.25057	4.08953e-10	2.78883e-09	0.68371	0.219157
4697	ENSG00000189043	NDUFA4	2991.56	0.889812	0.105492	8.43488	3.31554e-17	3.44665e-16	4020.46	0.472541	0.0608288	7.76837	7.95026e-15	8.38114e-14	0.681177	0.295055
23241	ENSG00000179364	PACS2	1470.76	0.682456	0.0986065	6.921	4.48457e-12	3.04922e-11	1489.43	0.677071	0.0820766	8.24926	1.59375e-16	1.94748e-15	0.679763	0.00380734
8802	ENSG00000163541	SUCLG1	4810.35	0.853437	0.0811346	10.5188	7.07787e-26	1.32403e-24	5438.27	0.50597	0.057114	8.85894	8.07775e-19	1.16238e-17	0.679704	0.245696
7286	ENSG00000143367	TUFT1	380.216	0.917098	0.133999	6.84408	7.69677e-12	5.14082e-11	243.693	0.442202	0.129172	3.42334	0.000618558	0.00181075	0.67965	0.335803
11078	ENSG00000100106	TRIOBP	1254.28	0.694823	0.0991181	7.01005	2.38231e-12	1.66938e-11	884.981	0.661368	0.0933472	7.08504	1.39006e-12	1.21092e-11	0.678096	0.0236561
80728	ENSG00000147799	ARHGAP39	307.955	0.926297	0.154966	5.97742	2.26699e-09	1.20272e-08	542.061	0.427671	0.113576	3.76549	0.000166224	0.000542763	0.676984	0.352582
5308	ENSG00000164093	PITX2	131.498	0.890535	0.184175	4.83526	1.3297e-06	5.07281e-06	148.001	0.461262	0.173788	2.65417	0.00795039	0.0183322	0.675899	0.303542
51019	ENSG00000120860	CCDC53	1160.56	0.644855	0.111519	5.78247	7.36096e-09	3.71117e-08	926.05	0.705576	0.096085	7.34325	2.08474e-13	1.95594e-12	0.675216	0.0429362
54187	ENSG00000095380	NANS	9470.1	0.770301	0.0779505	9.88193	4.98652e-23	7.83485e-22	2783.04	0.573968	0.0799902	7.17548	7.20555e-13	6.44325e-12	0.672134	0.138829
54498	ENSG00000088826	SMOX	475.204	0.40778	0.119379	3.41584	0.000635867	0.00163205	321.62	0.935578	0.116097	8.05858	7.71866e-16	8.93324e-15	0.671679	0.37321
6666	ENSG00000177732	SOX12	2524.71	0.780935	0.110909	7.0412	1.90594e-12	1.34493e-11	1505.98	0.56238	0.0792649	7.09494	1.2941e-12	1.13097e-11	0.671658	0.154542
81617	ENSG00000102547	CAB39L	988.732	0.608901	0.110491	5.51088	3.57048e-08	1.66362e-07	800.386	0.731508	0.0898478	8.14164	3.89974e-16	4.60215e-15	0.670204	0.0866961
55672	ENSG00000219481	NBPF1	803	0.561866	0.104788	5.36194	8.2332e-08	3.65799e-07	326.779	0.774089	0.122066	6.34157	2.27431e-10	1.59182e-09	0.667978	0.150064
4185	ENSG00000073670	ADAM11	233.815	0.586357	0.195003	3.00691	0.0026392	0.00606623	1190.14	0.746886	0.103371	7.2253	5.00013e-13	4.54131e-12	0.666621	0.113511
22900	ENSG00000105483	CARD8	623.392	0.845864	0.103865	8.14388	3.82821e-16	3.68556e-15	632.561	0.485672	0.0964557	5.03518	4.7741e-07	2.28928e-06	0.665768	0.254695
10476	ENSG00000167863	ATP5H	2378.43	0.876739	0.0903432	9.70455	2.88357e-22	4.38042e-21	3479.52	0.454107	0.0615755	7.3748	1.64591e-13	1.55412e-12	0.665423	0.298846
29796	ENSG00000184076	UQCR10	3250.76	0.802303	0.115165	6.96656	3.24788e-12	2.24163e-11	1993.19	0.526353	0.069206	7.6056	2.83595e-14	2.84526e-13	0.664328	0.195126
55217	ENSG00000185973	TMLHE	317.586	0.867961	0.142136	6.10657	1.01795e-09	5.58894e-09	465.449	0.460681	0.0996504	4.62298	3.78273e-06	1.59989e-05	0.664321	0.28799
79618	ENSG00000147421	HMBOX1	606.382	0.917692	0.120477	7.61713	2.59372e-14	2.17077e-13	449.205	0.410593	0.112911	3.63643	0.000276446	0.000865557	0.664142	0.358573
4703	ENSG00000183091	NEB	75.1414	0.604723	0.243063	2.48792	0.0128491	0.0256389	140.85	0.717477	0.16862	4.255	2.09052e-05	7.89757e-05	0.6611	0.0797288
22849	ENSG00000107864	CPEB3	209.976	0.804963	0.156613	5.13982	2.75009e-07	1.14259e-06	170.288	0.517014	0.149115	3.46723	0.00052585	0.00155965	0.660989	0.20361
51099	ENSG00000011198	ABHD5	606.84	0.792455	0.126171	6.28079	3.36864e-10	1.93822e-09	759.379	0.528652	0.0876708	6.02997	1.63993e-09	1.05156e-08	0.660553	0.186537
9766	ENSG00000100647	SUSD6	660.228	0.770909	0.111918	6.88816	5.65171e-12	3.81024e-11	505.946	0.548682	0.110307	4.97413	6.55406e-07	3.08528e-06	0.659795	0.157138
10497	ENSG00000198722	UNC13B	1633.93	0.877029	0.10651	8.23423	1.8071e-16	1.7806e-15	1340.92	0.440253	0.0766698	5.74219	9.34612e-09	5.55929e-08	0.658641	0.308848
100128640	ENSG00000229589	ACVR2B-AS1	88.9631	0.658927	0.27459	2.39967	0.0164096	0.0319711	45.8631	0.655096	0.259737	2.52216	0.0116638	0.0258287	0.657012	0.00270901
10825	ENSG00000162139	NEU3	1026.63	0.793283	0.102184	7.76326	8.27721e-15	7.21511e-14	1720.49	0.52037	0.0810135	6.42325	1.33395e-10	9.55525e-10	0.656826	0.192979
10513	ENSG00000062725	APPBP2	2189.4	0.848321	0.0798816	10.6197	2.41251e-26	4.65116e-25	3301.17	0.464658	0.0672911	6.90519	5.01357e-12	4.1362e-11	0.656489	0.271291
166	ENSG00000104964	AES	4218.65	0.813168	0.0955249	8.51263	1.70033e-17	1.81244e-16	4035.99	0.49897	0.0660011	7.56003	4.02975e-14	3.99108e-13	0.656069	0.222172
4723	ENSG00000167792	NDUFV1	5729.2	0.869031	0.100709	8.62911	6.18309e-18	6.87187e-17	3164.99	0.442368	0.063373	6.98039	2.94362e-12	2.47897e-11	0.6557	0.301696
283219	ENSG00000188997	KCTD21	426.63	0.868756	0.134049	6.48091	9.11726e-11	5.4991e-10	256.069	0.442341	0.130149	3.39873	0.000676986	0.00196722	0.655548	0.301521
9414	ENSG00000119139	TJP2	1257.52	0.761195	0.106895	7.12097	1.07166e-12	7.79884e-12	2069.69	0.548825	0.0869639	6.31095	2.77326e-10	1.9236e-09	0.65501	0.150168
163486	ENSG00000213047	DENND1B	355.68	0.618718	0.1298	4.76669	1.87273e-06	6.9875e-06	487.098	0.690577	0.107999	6.39427	1.61312e-10	1.14789e-09	0.654648	0.0508126
55785	ENSG00000180263	FGD6	545.132	0.61212	0.117611	5.20459	1.94424e-07	8.22709e-07	351.608	0.690762	0.119163	5.79677	6.76033e-09	4.07657e-08	0.651441	0.0556086
6548	ENSG00000090020	SLC9A1	1930.78	0.774753	0.0839921	9.22412	2.85893e-20	3.79059e-19	1054.69	0.527882	0.0860555	6.1342	8.55873e-10	5.63957e-09	0.651317	0.174564
23710	ENSG00000139112	GABARAPL1	1188.56	0.806006	0.12984	6.20768	5.37735e-10	3.04073e-09	2086.49	0.494071	0.0783205	6.30832	2.82077e-10	1.95487e-09	0.650039	0.220572
10005	ENSG00000101473	ACOT8	490.823	0.883071	0.127145	6.94538	3.77443e-12	2.58381e-11	356.492	0.41597	0.112572	3.69516	0.000219744	0.000702549	0.649521	0.33029
100190939	ENSG00000170919	TPT1-AS1	135.988	0.795855	0.180107	4.41878	9.9259e-06	3.36315e-05	106.869	0.501947	0.18679	2.68723	0.00720471	0.0168017	0.648901	0.207824
9452	ENSG00000078596	ITM2A	637.99	0.714344	0.142551	5.01115	5.41065e-07	2.17216e-06	619.365	0.581263	0.0932866	6.23094	4.63657e-10	3.15127e-09	0.647803	0.0941027
7384	ENSG00000010256	UQCRC1	8047.32	0.890448	0.0965702	9.22073	2.95075e-20	3.90206e-19	6236.84	0.404446	0.0807389	5.00931	5.46245e-07	2.60088e-06	0.647447	0.343655
3321	ENSG00000143061	IGSF3	11563.5	0.687299	0.100497	6.83901	7.97443e-12	5.31219e-11	3138.46	0.604024	0.0654334	9.23112	2.67813e-20	4.25013e-19	0.645661	0.0588843
57337	ENSG00000138468	SENP7	1329.29	0.496894	0.101314	4.90448	9.36739e-07	3.65012e-06	1234.73	0.792832	0.0896083	8.84775	8.93029e-19	1.27794e-17	0.644863	0.20926
84902	ENSG00000121289	CEP89	369.592	0.545097	0.125262	4.35165	1.35114e-05	4.4855e-05	301.69	0.742796	0.117792	6.30599	2.86364e-10	1.98204e-09	0.643946	0.139794
222255	ENSG00000146776	ATXN7L1	536.503	0.729218	0.1218	5.98703	2.13701e-09	1.13776e-08	470.843	0.558626	0.114337	4.8858	1.03012e-06	4.72033e-06	0.643922	0.120627
23304	ENSG00000024048	UBR2	3344.1	0.763534	0.0773746	9.86801	5.72872e-23	8.9452e-22	2292.03	0.524174	0.0765325	6.84904	7.43489e-12	6.03847e-11	0.643854	0.169253
7402	ENSG00000152818	UTRN	3718.42	0.524156	0.106281	4.93179	8.14802e-07	3.19806e-06	2888.31	0.756548	0.085159	8.88394	6.45351e-19	9.34462e-18	0.640352	0.164326
163050	ENSG00000249709	ZNF564	349.253	0.699643	0.128598	5.44053	5.31228e-08	2.41129e-07	307.128	0.579856	0.118221	4.90486	9.34955e-07	4.31106e-06	0.639749	0.0847019
10116	ENSG00000169018	FEM1B	12225.6	0.589947	0.0787515	7.49125	6.82214e-14	5.50249e-13	5712.47	0.689326	0.0841826	8.18846	2.64586e-16	3.18505e-15	0.639636	0.0702715
8717	ENSG00000102871	TRADD	82.267	0.848262	0.243534	3.48314	0.000495578	0.00129395	122.115	0.428539	0.173396	2.47144	0.0134569	0.0293145	0.6384	0.296789
1327	ENSG00000131143	COX4I1	7642.13	0.833027	0.0814526	10.2271	1.49875e-24	2.59789e-23	5255.18	0.44352	0.0604764	7.33377	2.23775e-13	2.09102e-12	0.638273	0.275423
125058	ENSG00000167291	TBC1D16	28780.6	0.728811	0.106828	6.82229	8.96029e-12	5.94534e-11	70939.2	0.544498	0.0612559	8.8889	6.17181e-19	8.94471e-18	0.636654	0.130329
10449	ENSG00000167315	ACAA2	2051.24	0.834884	0.0817521	10.2124	1.7452e-24	3.01127e-23	1483.23	0.436445	0.0708321	6.16169	7.19735e-10	4.78533e-09	0.635664	0.281739
84274	ENSG00000110871	COQ5	900.863	0.696659	0.106752	6.52594	6.75752e-11	4.12441e-10	715.69	0.569695	0.0897833	6.34522	2.22103e-10	1.55722e-09	0.633177	0.0897769
100288198	ENSG00000270362	HMGN3-AS1	93.0163	0.592494	0.206638	2.86731	0.00413983	0.00915487	101.283	0.673296	0.182733	3.68459	0.000229074	0.000729642	0.632895	0.0571355
79731	ENSG00000137513	NARS2	4506.51	0.72896	0.0786912	9.26355	1.97753e-20	2.6664e-19	2064.58	0.536502	0.0845353	6.34649	2.2028e-10	1.54578e-09	0.632731	0.136088
4698	ENSG00000128609	NDUFA5	3825.19	0.770909	0.100703	7.65531	1.92851e-14	1.6312e-13	3912.84	0.493962	0.0746625	6.61593	3.69216e-11	2.79683e-10	0.632436	0.195831
122416	ENSG00000156381	ANKRD9	384.177	0.620037	0.186729	3.32052	0.000898507	0.00224034	250.816	0.644125	0.165272	3.89736	9.72478e-05	0.000331518	0.632081	0.0170327
192286	ENSG00000146066	HIGD2A	1118.36	0.727989	0.103297	7.04752	1.82132e-12	1.29124e-11	1085.05	0.533461	0.0863768	6.17597	6.57568e-10	4.3828e-09	0.630725	0.137552
83852	ENSG00000136169	SETDB2	3361.2	0.486635	0.0849891	5.72585	1.02918e-08	5.10369e-08	2784.42	0.770773	0.0718671	10.725	7.77052e-27	1.85702e-25	0.628704	0.200916
26160	ENSG00000138002	IFT172	1735.32	0.425845	0.117099	3.63663	0.000276228	0.000754462	1965.3	0.830084	0.066779	12.4303	1.78939e-35	6.30292e-34	0.627965	0.28584
9811	ENSG00000134030	CTIF	738.323	0.740522	0.113684	6.51388	7.32333e-11	4.45979e-10	599.254	0.512254	0.0944402	5.42411	5.82437e-08	3.15416e-07	0.626388	0.16141
400451	ENSG00000185442	FAM174B	1588.85	0.847029	0.0933284	9.0758	1.1285e-19	1.44798e-18	542.235	0.405368	0.095474	4.24585	2.17768e-05	8.20007e-05	0.626199	0.312302
348262	ENSG00000225663	FAM195B	844.712	0.618064	0.118981	5.19466	2.05097e-07	8.65692e-07	1218.75	0.633715	0.0872173	7.26594	3.70464e-13	3.39515e-12	0.625889	0.0110673
51004	ENSG00000119723	COQ6	340.695	0.807653	0.130308	6.19804	5.71722e-10	3.22327e-09	456.219	0.442744	0.101391	4.36671	1.26134e-05	4.95213e-05	0.625198	0.25803
284131	ENSG00000173818	ENDOV	176.134	0.833613	0.193398	4.31035	1.63e-05	5.35364e-05	143.963	0.41445	0.175933	2.35572	0.0184867	0.0389417	0.624032	0.296393
55683	ENSG00000114982	KANSL3	4630.1	0.659434	0.0917359	7.1884	6.5556e-13	4.8644e-12	2886.62	0.588267	0.0669299	8.7893	1.50492e-18	2.11485e-17	0.623851	0.0503228
6389	ENSG00000073578	SDHA	7420.32	0.830489	0.0792262	10.4825	1.0395e-25	1.92313e-24	6382.47	0.414015	0.0569124	7.2746	3.47449e-13	3.19507e-12	0.622252	0.294491
10927	ENSG00000106723	SPIN1	2594.2	0.698426	0.0989593	7.05771	1.69268e-12	1.20399e-11	3052	0.54165	0.0709956	7.62934	2.35954e-14	2.38798e-13	0.620038	0.110858
22904	ENSG00000064932	SBNO2	3309.79	0.68431	0.0808136	8.46775	2.50172e-17	2.62262e-16	2464.01	0.553161	0.0731541	7.56158	3.98202e-14	3.94863e-13	0.618735	0.0927364
57404	ENSG00000119004	CYP20A1	647.723	0.727611	0.132827	5.47789	4.30422e-08	1.9859e-07	527.245	0.509711	0.10277	4.95973	7.05919e-07	3.30865e-06	0.618661	0.154079
90624	ENSG00000186687	LYRM7	2201.51	0.7102	0.0794662	8.93713	3.99417e-19	4.88445e-18	978.178	0.526079	0.0962214	5.46738	4.56735e-08	2.49932e-07	0.61814	0.130193
100289274	ENSG00000247400	DNAJC3-AS1	134.087	0.53418	0.192604	2.77346	0.00554629	0.0119794	143.748	0.701499	0.163075	4.30168	1.69506e-05	6.50062e-05	0.617839	0.118312
50862	ENSG00000110315	RNF141	1294.49	0.712997	0.101173	7.04727	1.82461e-12	1.29236e-11	1711.56	0.517135	0.0766341	6.74811	1.49781e-11	1.18385e-10	0.615066	0.138495
3029	ENSG00000063854	HAGH	672.281	0.676378	0.115287	5.8669	4.44028e-09	2.2867e-08	646.353	0.552632	0.100783	5.4834	4.17238e-08	2.29325e-07	0.614505	0.0875017
130617	ENSG00000158552	ZFAND2B	258.267	0.50055	0.143573	3.48638	0.000489611	0.00128014	224.142	0.722694	0.130955	5.51866	3.41585e-08	1.8922e-07	0.611622	0.15708
55847	ENSG00000122873	CISD1	2842.87	0.682103	0.10753	6.34336	2.24802e-10	1.31446e-09	1395.13	0.540937	0.0723296	7.47877	7.50208e-14	7.27446e-13	0.61152	0.0998198
55502	ENSG00000144485	HES6	3274.58	0.675132	0.132327	5.102	3.36086e-07	1.3823e-06	943.122	0.545498	0.0917458	5.94575	2.75186e-09	1.72756e-08	0.610315	0.0916652
64847	ENSG00000006282	SPATA20	2140.48	0.670674	0.0959218	6.99188	2.71231e-12	1.88924e-11	1730.04	0.548778	0.0819332	6.69787	2.11483e-11	1.63955e-10	0.609726	0.0861934
54470	ENSG00000198960	ARMCX6	215.448	0.723255	0.165145	4.37951	1.18946e-05	3.98198e-05	406.59	0.496111	0.108612	4.56773	4.93042e-06	2.04473e-05	0.609683	0.160615
11030	ENSG00000157110	RBPMS	834.38	0.51499	0.103699	4.96623	6.82675e-07	2.70546e-06	988.789	0.698644	0.0871639	8.01529	1.09876e-15	1.25199e-14	0.606817	0.129863
10939	ENSG00000141385	AFG3L2	7623.28	0.798121	0.0917506	8.69881	3.35393e-18	3.83759e-17	5589.79	0.415102	0.0605762	6.85255	7.25429e-12	5.89474e-11	0.606611	0.270835
140461	ENSG00000177981	ASB8	545.536	0.718829	0.110852	6.4846	8.89693e-11	5.37049e-10	606.223	0.493803	0.091905	5.37297	7.74519e-08	4.13766e-07	0.606316	0.159118
23125	ENSG00000108509	CAMTA2	821.368	0.807384	0.11297	7.14686	8.87841e-13	6.51759e-12	1400.68	0.404659	0.0769796	5.2567	1.46662e-07	7.52491e-07	0.606022	0.28477
400916	ENSG00000250479	CHCHD10	1034.87	0.675582	0.143016	4.72383	2.31447e-06	8.53873e-06	642.64	0.53483	0.112533	4.75264	2.00776e-06	8.84496e-06	0.605206	0.0995266
23116	ENSG00000198718	FAM179B	1225.88	0.665626	0.0919937	7.23556	4.63606e-13	3.47589e-12	1032.1	0.544443	0.093674	5.8121	6.1694e-09	3.74252e-08	0.605035	0.0856897
5305	ENSG00000150867	PIP4K2A	9389.95	0.667322	0.0740758	9.00863	2.08638e-19	2.60625e-18	7050.17	0.542404	0.0638087	8.50047	1.88832e-17	2.44576e-16	0.604863	0.0883303
7157	ENSG00000141510	TP53	920.924	0.708653	0.105259	6.73247	1.66809e-11	1.07794e-10	959.088	0.49924	0.0782393	6.38093	1.76011e-10	1.24646e-09	0.603947	0.148078
51185	ENSG00000113851	CRBN	1168.25	0.721408	0.106296	6.7868	1.14651e-11	7.51821e-11	817.784	0.484509	0.0858103	5.64628	1.63961e-08	9.45094e-08	0.602958	0.167513
79842	ENSG00000185670	ZBTB3	127.929	0.494267	0.197966	2.49673	0.0125345	0.0250774	106.842	0.711413	0.179964	3.95308	7.71529e-05	0.00026706	0.60284	0.153545
10922	ENSG00000164896	FASTK	1591.6	0.693951	0.106487	6.51678	7.18319e-11	4.37798e-10	1816.75	0.509628	0.0722889	7.04987	1.79082e-12	1.53447e-11	0.601789	0.130336
10577	ENSG00000119655	NPC2	1824.64	0.43342	0.0909798	4.76392	1.89871e-06	7.07917e-06	4108.91	0.768128	0.0730241	10.5188	7.07444e-26	1.58544e-24	0.600774	0.236674
670	ENSG00000137274	BPHL	421.446	0.612856	0.146358	4.18736	2.82216e-05	8.94088e-05	668.079	0.587266	0.0936824	6.26869	3.64096e-10	2.49448e-09	0.600061	0.0180947
4150	ENSG00000103495	MAZ	8251.82	0.517321	0.0721724	7.16785	7.61846e-13	5.61448e-12	5144.52	0.682632	0.0655768	10.4096	2.24047e-25	4.87934e-24	0.599976	0.116892
93058	ENSG00000135469	COQ10A	431.765	0.619305	0.160232	3.86504	0.000111071	0.00032242	458.637	0.579157	0.0991516	5.84112	5.18497e-09	3.17506e-08	0.599231	0.0283888
23176	ENSG00000164402	SEPT8	1785.57	0.597916	0.0997465	5.99436	2.04294e-09	1.08921e-08	1683.18	0.596516	0.0694534	8.58873	8.79385e-18	1.16888e-16	0.597216	0.000989522
9465	ENSG00000118507	AKAP7	608.003	0.551406	0.129896	4.24497	2.18621e-05	7.04126e-05	404.586	0.643015	0.112848	5.69805	1.21187e-08	7.08625e-08	0.59721	0.0647774
101241892	ENSG00000281183	NPTN-IT1	161.587	0.421012	0.170505	2.46921	0.0135413	0.0268957	137.85	0.772448	0.181215	4.2626	2.02064e-05	7.65679e-05	0.59673	0.248503
132321	ENSG00000151470	C4orf33	334.194	0.560686	0.13742	4.08009	4.50188e-05	0.000138784	359.494	0.626388	0.121166	5.16968	2.34498e-07	1.17054e-06	0.593537	0.0464589
64784	ENSG00000140577	CRTC3	3846.81	0.634522	0.0824921	7.69191	1.44958e-14	1.23578e-13	1626.59	0.552465	0.0780979	7.07401	1.50519e-12	1.30142e-11	0.593493	0.0580227
166815	ENSG00000180346	TIGD2	552.97	0.640956	0.118453	5.41106	6.26522e-08	2.82346e-07	362.664	0.541382	0.112629	4.80676	1.53395e-06	6.86782e-06	0.591169	0.0704095
114984	ENSG00000162076	FLYWCH2	371.624	0.733775	0.146154	5.02057	5.15191e-07	2.07325e-06	372.247	0.448434	0.119903	3.73996	0.000184048	0.000595592	0.591104	0.201766
440957	ENSG00000168273	SMIM4	541.05	0.43889	0.124656	3.52081	0.000430236	0.00113451	340.94	0.7419	0.134679	5.50867	3.61563e-08	1.99878e-07	0.590395	0.214261
55114	ENSG00000140750	ARHGAP17	3516.29	0.685828	0.0824789	8.31519	9.16031e-17	9.2367e-16	1870.58	0.493545	0.0881818	5.5969	2.18221e-08	1.23934e-07	0.589686	0.135965
84542	ENSG00000162929	KIAA1841	624.025	0.5629	0.102792	5.47608	4.34854e-08	2.00452e-07	565.245	0.615565	0.0981946	6.26883	3.63781e-10	2.49338e-09	0.589232	0.0372397
3315	ENSG00000106211	HSPB1	514.258	0.480377	0.167168	2.87363	0.0040579	0.00898553	4301.29	0.696222	0.165479	4.20732	2.58415e-05	9.61668e-05	0.5883	0.152626
220929	ENSG00000183621	ZNF438	428.23	0.627727	0.124944	5.02406	5.05915e-07	2.03917e-06	325.968	0.54886	0.119423	4.59592	4.30849e-06	1.80202e-05	0.588294	0.0557676
9741	ENSG00000068697	LAPTM4A	3697.9	0.660428	0.0797308	8.28323	1.19881e-16	1.19921e-15	4500.6	0.515812	0.0721189	7.15224	8.53755e-13	7.57579e-12	0.58812	0.102259
549	ENSG00000148090	AUH	509.234	0.706636	0.14243	4.96127	7.00338e-07	2.774e-06	453.392	0.468895	0.115123	4.073	4.64117e-05	0.00016575	0.587766	0.168108
5723	ENSG00000146733	PSPH	1567.05	0.692077	0.116767	5.92697	3.08575e-09	1.61611e-08	3069.32	0.48327	0.0665146	7.26562	3.71327e-13	3.40114e-12	0.587674	0.147649
439931	ENSG00000230513	THAP7-AS1	238.793	0.577702	0.151048	3.82462	0.000130974	0.000375863	71.4211	0.595136	0.211227	2.81752	0.00483966	0.0117567	0.586419	0.0123275
727764	ENSG00000274847	MAFIP	124.141	0.447171	0.193284	2.31355	0.0206925	0.0392627	141.996	0.723728	0.160308	4.51462	6.3431e-06	2.58754e-05	0.58545	0.195555
100652772	ENSG00000248092	NNT-AS1	1607.45	0.440928	0.102928	4.28387	1.83672e-05	5.97966e-05	921.145	0.729958	0.0869963	8.39068	4.83342e-17	6.07572e-16	0.585443	0.204375
84181	ENSG00000124177	CHD6	4792.05	0.594068	0.0981625	6.05188	1.43165e-09	7.76997e-09	4641.45	0.576759	0.0658419	8.75977	1.95653e-18	2.73054e-17	0.585413	0.0122388
10564	ENSG00000124198	ARFGEF2	8334.2	0.713725	0.0953898	7.48219	7.30932e-14	5.87974e-13	9722.95	0.45436	0.0591377	7.68308	1.55303e-14	1.60075e-13	0.584042	0.183399
57143	ENSG00000063761	ADCK1	211.789	0.477834	0.155405	3.07476	0.0021067	0.00493763	298.633	0.689993	0.119788	5.7601	8.40643e-09	5.02062e-08	0.583914	0.150019
324	ENSG00000134982	APC	5367.28	0.749432	0.0920673	8.14005	3.95128e-16	3.79439e-15	9075.45	0.418051	0.0673018	6.21159	5.24504e-10	3.5405e-09	0.583742	0.234322
7267	ENSG00000182670	TTC3	21301.6	0.628559	0.113141	5.55552	2.76792e-08	1.30823e-07	8627.04	0.537682	0.0677857	7.93209	2.15483e-15	2.39142e-14	0.583121	0.0642593
285381	ENSG00000154813	DPH3	2475.34	0.758315	0.111801	6.78273	1.17925e-11	7.71283e-11	1351.76	0.403926	0.0776227	5.20371	1.95347e-07	9.86356e-07	0.581121	0.250591
5193	ENSG00000108733	PEX12	420.987	0.63728	0.127346	5.00433	5.60555e-07	2.24326e-06	191.095	0.519534	0.156828	3.31275	0.00092382	0.00261416	0.578407	0.0832592
9600	ENSG00000110697	PITPNM1	1500.77	0.667864	0.10101	6.61189	3.79443e-11	2.37485e-10	739.791	0.488102	0.0928405	5.25743	1.46085e-07	7.50003e-07	0.577983	0.127111
57473	ENSG00000196700	ZNF512B	2010.31	0.470571	0.0836272	5.627	1.83369e-08	8.84372e-08	2174.22	0.685237	0.0723	9.47769	2.5998e-21	4.37886e-20	0.577904	0.151792
64743	ENSG00000101940	WDR13	1156.94	0.588688	0.0999255	5.89127	3.83244e-09	1.98381e-08	1428.26	0.566807	0.0735123	7.71037	1.25449e-14	1.30215e-13	0.577748	0.0154721
79639	ENSG00000126106	TMEM53	129.356	0.615051	0.192304	3.19833	0.00138227	0.00334396	234.574	0.540194	0.133655	4.04171	5.30624e-05	0.00018772	0.577622	0.0529316
51409	ENSG00000114735	HEMK1	779.029	0.501147	0.125863	3.9817	6.84254e-05	0.000204924	663.337	0.653666	0.0892483	7.32413	2.40462e-13	2.23926e-12	0.577406	0.107847
192670	ENSG00000134698	AGO4	2011.36	0.464526	0.133488	3.47991	0.000501574	0.00130802	1255.86	0.688385	0.0862068	7.98528	1.40207e-15	1.57653e-14	0.576455	0.158293
55929	ENSG00000178028	DMAP1	825.128	0.584635	0.104425	5.59863	2.16049e-08	1.03243e-07	400.74	0.561909	0.107359	5.2339	1.65969e-07	8.45126e-07	0.573272	0.0160694
4696	ENSG00000170906	NDUFA3	800.389	0.644647	0.132578	4.86239	1.15974e-06	4.46043e-06	633.302	0.499607	0.0970145	5.14981	2.60744e-07	1.2916e-06	0.572127	0.102559
29800	ENSG00000159714	ZDHHC1	122.116	0.635518	0.206331	3.08009	0.00206941	0.00486003	159.845	0.506897	0.158732	3.19342	0.00140598	0.00383908	0.571208	0.090949
11276	ENSG00000275066	SYNRG	2177.23	0.629658	0.0859018	7.32998	2.30191e-13	1.76795e-12	2261.38	0.51181	0.0681943	7.50517	6.13512e-14	6.00649e-13	0.570734	0.0833316
57610	ENSG00000141084	RANBP10	3619.84	0.419112	0.0954412	4.39131	1.1267e-05	3.78361e-05	1234.31	0.716333	0.0839434	8.53352	1.41962e-17	1.86101e-16	0.567722	0.210167
79725	ENSG00000168152	THAP9	258.133	0.617643	0.153736	4.01756	5.88032e-05	0.000177833	269.611	0.516953	0.124962	4.13689	3.52045e-05	0.000127983	0.567298	0.0711985
81928	ENSG00000149679	CABLES2	558.222	0.62644	0.106688	5.87171	4.31334e-09	2.22361e-08	601.698	0.507834	0.0956954	5.30678	1.1158e-07	5.82454e-07	0.567137	0.0838671
1349	ENSG00000131174	COX7B	4435.93	0.41535	0.117589	3.53222	0.000412094	0.00109181	4636.57	0.718401	0.0599248	11.9884	4.08845e-33	1.28382e-31	0.566876	0.214289
4695	ENSG00000131495	NDUFA2	300.924	0.689421	0.141599	4.86884	1.12256e-06	4.32401e-06	261.628	0.440789	0.127532	3.45631	0.000547624	0.00161889	0.565105	0.17581
4708	ENSG00000090266	NDUFB2	434.888	0.667515	0.139305	4.79174	1.65341e-06	6.21675e-06	698.94	0.462074	0.0954066	4.84321	1.27758e-06	5.77586e-06	0.564795	0.145269
11145	ENSG00000176485	PLA2G16	993.318	0.723801	0.107788	6.71506	1.87983e-11	1.21115e-10	186.523	0.403701	0.147926	2.72908	0.00635119	0.0149925	0.563751	0.226345
83549	ENSG00000130717	UCK1	3903.26	0.515068	0.0890087	5.78672	7.17737e-09	3.62344e-08	1947.4	0.61145	0.0702789	8.70033	3.30934e-18	4.525e-17	0.563259	0.0681518
79947	ENSG00000117682	DHDDS	2081.17	0.689601	0.0896739	7.69009	1.47034e-14	1.25277e-13	1422.99	0.433034	0.0707893	6.11722	9.52212e-10	6.24643e-09	0.561317	0.18142
143570	ENSG00000166435	XRRA1	1285.5	0.701102	0.0883105	7.93906	2.03722e-15	1.85386e-14	1376.28	0.416234	0.0726473	5.72951	1.00721e-08	5.95833e-08	0.558668	0.201432
6595	ENSG00000080503	SMARCA2	1598.02	0.659924	0.0835262	7.9008	2.77114e-15	2.50065e-14	2268.82	0.454849	0.0707004	6.43347	1.24723e-10	8.95786e-10	0.557386	0.14501
10422	ENSG00000130560	UBAC1	561.01	0.578161	0.1218	4.74679	2.06667e-06	7.67325e-06	1578.89	0.535597	0.0683568	7.83532	4.67658e-15	5.05501e-14	0.556879	0.0300972
353116	ENSG00000188026	RILPL1	1283.14	0.474525	0.108204	4.38547	1.15734e-05	3.88307e-05	501.029	0.638262	0.101873	6.26526	3.72193e-10	2.54565e-09	0.556394	0.115779
162972	ENSG00000251369	ZNF550	1070.71	0.629889	0.106345	5.92307	3.15981e-09	1.65261e-08	519.709	0.478302	0.113098	4.2291	2.34625e-05	8.78785e-05	0.554096	0.107188
2631	ENSG00000146729	GBAS	4263.02	0.69925	0.0745475	9.37993	6.60148e-21	9.29063e-20	5414.35	0.405807	0.0632181	6.41916	1.37029e-10	9.8069e-10	0.552529	0.207496
55762	ENSG00000167562	ZNF701	236.83	0.691157	0.165039	4.18783	2.8163e-05	8.9242e-05	389.892	0.411026	0.104315	3.94023	8.14033e-05	0.000280753	0.551091	0.198083
3275	ENSG00000160310	PRMT2	2861.58	0.585587	0.0833378	7.02667	2.11527e-12	1.48708e-11	3144.46	0.511029	0.0634139	8.05864	7.71502e-16	8.93324e-15	0.548308	0.0527199
79048	ENSG00000187742	SECISBP2	792.884	0.562664	0.103754	5.42305	5.85905e-08	2.6499e-07	1895.5	0.533292	0.0653251	8.16366	3.25032e-16	3.87527e-15	0.547978	0.0207694
57474	ENSG00000188033	ZNF490	400.299	0.484961	0.134112	3.6161	0.000299077	0.000811588	242.057	0.60967	0.127969	4.76419	1.89612e-06	8.38505e-06	0.547315	0.0881827
9641	ENSG00000263528	IKBKE	321.989	0.638516	0.133896	4.76876	1.85361e-06	6.92126e-06	301.589	0.453763	0.125511	3.61534	0.000299956	0.000933217	0.54614	0.13064
65267	ENSG00000196632	WNK3	359.64	0.604124	0.126259	4.78479	1.71169e-06	6.42309e-06	672.995	0.487668	0.0937038	5.20436	1.94669e-07	9.83238e-07	0.545896	0.0823471
808	ENSG00000160014	CALM3	6247.14	0.672056	0.0837257	8.02688	9.99849e-16	9.36352e-15	8689.44	0.417137	0.0669606	6.22958	4.67678e-10	3.17727e-09	0.544596	0.180255
286101	ENSG00000196922	ZNF252P	1206.13	0.595015	0.0926545	6.42187	1.34613e-10	8.03269e-10	1487.36	0.491776	0.0788757	6.23482	4.52303e-10	3.07798e-09	0.543395	0.073001
11236	ENSG00000170881	RNF139	1497.44	0.599995	0.0974588	6.15639	7.44204e-10	4.1401e-09	1512.69	0.472912	0.0827755	5.71319	1.10881e-08	6.52597e-08	0.536453	0.0898613
54521	ENSG00000131725	WDR44	929.088	0.615861	0.105549	5.83485	5.38401e-09	2.74911e-08	1091.02	0.456341	0.0808214	5.64629	1.63943e-08	9.45094e-08	0.536101	0.112798
286097	ENSG00000155970	MICU3	263.893	0.630021	0.13576	4.6407	3.47223e-06	1.25377e-05	207.932	0.442063	0.150422	2.93883	0.00329459	0.00831369	0.536042	0.132906
55552	ENSG00000197933	ZNF823	133.8	0.458939	0.185364	2.47588	0.013291	0.0264333	109.84	0.609305	0.189384	3.2173	0.00129403	0.00355377	0.534122	0.106325
1345	ENSG00000164919	COX6C	3017.6	0.604414	0.0904092	6.68532	2.30422e-11	1.47141e-10	5349.6	0.462622	0.0617283	7.49449	6.65552e-14	6.48074e-13	0.533518	0.100262
9399	ENSG00000067221	STOML1	149.662	0.657452	0.168773	3.89547	9.80083e-05	0.000287148	109.166	0.408195	0.176167	2.31709	0.0204986	0.0426131	0.532824	0.176251
6238	ENSG00000125844	RRBP1	4380.8	0.54655	0.0771893	7.08065	1.43481e-12	1.03027e-11	8071.57	0.518044	0.0540433	9.58572	9.18169e-22	1.6066e-20	0.532297	0.0201572
80344	ENSG00000100897	DCAF11	2043.94	0.644817	0.0999179	6.45347	1.09317e-10	6.55943e-10	1454.98	0.414207	0.0728513	5.68565	1.30319e-08	7.58734e-08	0.529512	0.163066
29978	ENSG00000188021	UBQLN2	1324.82	0.521171	0.0948921	5.49225	3.96847e-08	1.83773e-07	1254.7	0.535415	0.0767954	6.97197	3.12538e-12	2.62931e-11	0.528293	0.0100716
79864	ENSG00000109944	C11orf63	215.886	0.426701	0.181196	2.35491	0.018527	0.0355736	262.408	0.626827	0.122556	5.1146	3.14403e-07	1.54185e-06	0.526764	0.141511
23331	ENSG00000100154	TTC28	1645.4	0.508687	0.10224	4.9754	6.51116e-07	2.58618e-06	1621.52	0.539837	0.0736639	7.32838	2.32949e-13	2.17298e-12	0.524262	0.0220267
7299	ENSG00000077498	TYR	29693.7	0.426219	0.0901733	4.72666	2.28244e-06	8.42878e-06	19648.8	0.622254	0.0857372	7.25769	3.93749e-13	3.60243e-12	0.524236	0.138618
137994	ENSG00000165046	LETM2	143.532	0.492354	0.178249	2.76217	0.00574194	0.012372	91.9155	0.554435	0.198845	2.78828	0.00529885	0.0127404	0.523395	0.0438977
79654	ENSG00000126107	HECTD3	2897.07	0.616772	0.0815325	7.56474	3.88652e-14	3.20834e-13	2211.76	0.429815	0.0754162	5.69923	1.20347e-08	7.04472e-08	0.523293	0.132199
157	ENSG00000100077	ADRBK2	9740.99	0.503676	0.102645	4.90696	9.24989e-07	3.60805e-06	4717.61	0.542646	0.0738574	7.34722	2.0237e-13	1.90087e-12	0.523161	0.0275563
84936	ENSG00000166140	ZFYVE19	1126.29	0.515033	0.099905	5.15522	2.53328e-07	1.05892e-06	477.178	0.531127	0.0980539	5.41668	6.07152e-08	3.28032e-07	0.52308	0.0113804
22911	ENSG00000085433	WDR47	1315.01	0.597876	0.0881939	6.77911	1.20922e-11	7.89178e-11	620.34	0.448144	0.111566	4.01686	5.89775e-05	0.000207336	0.52301	0.105877
91608	ENSG00000270885	RASL10B	293.541	0.46131	0.138025	3.34221	0.000831141	0.00208752	84.766	0.583776	0.200473	2.91199	0.00359131	0.00898272	0.522543	0.0865965
29085	ENSG00000054148	PHPT1	404.254	0.63614	0.13296	4.78444	1.71461e-06	6.43243e-06	766.844	0.408372	0.0974569	4.19028	2.78606e-05	0.000103065	0.522256	0.161056
57502	ENSG00000146938	NLGN4X	823.105	0.568349	0.108306	5.24764	1.54061e-07	6.6098e-07	208.341	0.472148	0.14549	3.24524	0.00117353	0.00324926	0.520248	0.0680244
10160	ENSG00000152767	FARP1	6114.61	0.508416	0.0904962	5.61809	1.93078e-08	9.27349e-08	6857.72	0.531506	0.0599722	8.86254	7.82134e-19	1.12748e-17	0.519961	0.016327
130814	ENSG00000162976	PQLC3	188.31	0.616437	0.181432	3.39762	0.000679738	0.00173522	400.654	0.422977	0.108326	3.90465	9.43605e-05	0.000322014	0.519707	0.136797
85236	ENSG00000197903	HIST1H2BK	691.38	0.526485	0.111836	4.70767	2.5056e-06	9.21463e-06	1168.94	0.512862	0.0855826	5.9926	2.06516e-09	1.30915e-08	0.519674	0.00963319
26234	ENSG00000118564	FBXL5	1261.84	0.632698	0.0891119	7.10004	1.24718e-12	9.01601e-12	1487.1	0.405807	0.0789682	5.13886	2.76406e-07	1.36626e-06	0.519252	0.160436
9681	ENSG00000100150	DEPDC5	1376.95	0.526615	0.0881891	5.97143	2.35188e-09	1.24426e-08	820.929	0.511538	0.0865222	5.91222	3.37525e-09	2.09939e-08	0.519076	0.0106607
84869	ENSG00000145439	CBR4	2000.67	0.449619	0.117252	3.83465	0.000125746	0.000361683	1598.58	0.588045	0.0756149	7.77684	7.43565e-15	7.86935e-14	0.518832	0.0978818
51250	ENSG00000130349	C6orf203	784.519	0.447323	0.102329	4.37141	1.23449e-05	4.12086e-05	425.944	0.587881	0.103679	5.67022	1.42613e-08	8.27637e-08	0.517602	0.0993892
8916	ENSG00000138641	HERC3	1544.9	0.586153	0.104209	5.62479	1.85729e-08	8.93756e-08	1097.02	0.44022	0.0795905	5.53107	3.18286e-08	1.76798e-07	0.513186	0.10319
162967	ENSG00000182986	ZNF320	152.706	0.611027	0.183615	3.32777	0.000875452	0.00218682	728.308	0.412938	0.0883239	4.67527	2.93572e-06	1.26307e-05	0.511982	0.14007
283450	ENSG00000173064	HECTD4	1826.13	0.589928	0.102814	5.73784	9.58892e-09	4.77079e-08	2541.06	0.429451	0.0682116	6.29586	3.05695e-10	2.10773e-09	0.50969	0.113475
84859	ENSG00000186001	LRCH3	4628.01	0.494576	0.0826322	5.98527	2.16033e-09	1.14896e-08	2547.41	0.524005	0.0713997	7.33904	2.15138e-13	2.0138e-12	0.509291	0.0208093
54556	ENSG00000071243	ING3	840.381	0.447923	0.120871	3.7058	0.000210726	0.000587987	925.077	0.569048	0.0871119	6.53238	6.47347e-11	4.78511e-10	0.508485	0.0856483
54841	ENSG00000134897	BIVM	832.858	0.581783	0.113065	5.14558	2.66702e-07	1.11113e-06	375.211	0.426698	0.108144	3.94566	7.95816e-05	0.000274934	0.50424	0.109662
51	ENSG00000161533	ACOX1	1885.09	0.596237	0.0927872	6.42585	1.31136e-10	7.83759e-10	3006.25	0.407443	0.0762875	5.34088	9.24947e-08	4.88173e-07	0.50184	0.133498
84976	ENSG00000154309	DISP1	240.632	0.54642	0.148844	3.6711	0.000241507	0.000667346	101.359	0.45723	0.186297	2.45431	0.0141157	0.0305934	0.501825	0.0630671
9200	ENSG00000165996	HACD1	532.773	0.468312	0.141547	3.30853	0.000937867	0.00233194	168.619	0.532281	0.159573	3.33565	0.000850992	0.00242118	0.500296	0.0452328
55000	ENSG00000253352	TUG1	14895.4	0.545625	0.0877931	6.21489	5.136e-10	2.9097e-09	7265.47	0.454531	0.0738613	6.15384	7.56268e-10	5.01589e-09	0.500078	0.0644132
131870	ENSG00000198585	NUDT16	1489.16	0.482191	0.0889092	5.42341	5.84725e-08	2.64535e-07	1361.12	0.517686	0.0812347	6.37272	1.8571e-10	1.31228e-09	0.499938	0.0250985
114883	ENSG00000117859	OSBPL9	17720.5	0.533843	0.0812175	6.573	4.93114e-11	3.04968e-10	7578.63	0.462479	0.0635293	7.27977	3.34378e-13	3.08362e-12	0.498161	0.0504617
51160	ENSG00000160948	VPS28	439.173	0.479074	0.146033	3.28059	0.00103589	0.00255753	790.148	0.511102	0.084209	6.06945	1.2835e-09	8.31532e-09	0.495088	0.0226473
23164	ENSG00000133030	MPRIP	3110.62	0.562504	0.0868454	6.47707	9.35238e-11	5.63641e-10	4253.95	0.427626	0.0607974	7.03363	2.01234e-12	1.7161e-11	0.495065	0.0953727
8476	ENSG00000143776	CDC42BPA	2288.3	0.541523	0.081595	6.63671	3.20752e-11	2.01838e-10	4054.97	0.446981	0.0719792	6.20986	5.30324e-10	3.57142e-09	0.494252	0.0668517
4694	ENSG00000125356	NDUFA1	1239.39	0.516267	0.117536	4.39241	1.12102e-05	3.76622e-05	1206.48	0.47174	0.0860376	5.48296	4.18278e-08	2.29819e-07	0.494004	0.0314854
256471	ENSG00000164073	MFSD8	278.994	0.49307	0.139082	3.54517	0.000392357	0.00104336	345.085	0.494714	0.110753	4.46681	7.93938e-06	3.19527e-05	0.493892	0.00116219
8724	ENSG00000112335	SNX3	5858.58	0.533905	0.107452	4.96879	6.7373e-07	2.67141e-06	4041.27	0.45382	0.0643494	7.05243	1.75818e-12	1.50729e-11	0.493862	0.0566285
5579	ENSG00000166501	PRKCB	3600.35	0.538584	0.126283	4.26491	1.99985e-05	6.47552e-05	1292.92	0.447722	0.0789105	5.6738	1.39665e-08	8.11605e-08	0.493153	0.0642487
84552	ENSG00000178184	PARD6G	590.824	0.414045	0.12714	3.25661	0.0011275	0.00276613	628.693	0.5703	0.0976461	5.84048	5.20518e-09	3.18623e-08	0.492173	0.110489
8986	ENSG00000162302	RPS6KA4	1206.49	0.555114	0.104662	5.30385	1.13383e-07	4.95027e-07	1525.67	0.428385	0.0762078	5.62128	1.89551e-08	1.08297e-07	0.49175	0.0896109
138639	ENSG00000158079	PTPDC1	780.447	0.407422	0.10566	3.85597	0.00011527	0.000333455	959.147	0.576061	0.0930888	6.18829	6.082e-10	4.07167e-09	0.491741	0.119246
84836	ENSG00000114779	ABHD14B	2449.47	0.474584	0.100855	4.7056	2.53115e-06	9.3018e-06	1262.85	0.507319	0.0857176	5.91849	3.24902e-09	2.02476e-08	0.490952	0.0231471
11101	ENSG00000107669	ATE1	1962.54	0.407264	0.0909026	4.48023	7.45639e-06	2.56377e-05	1936.74	0.574241	0.0722635	7.94649	1.91865e-15	2.13956e-14	0.490753	0.118071
57648	ENSG00000162522	KIAA1522	2600.09	0.484054	0.139396	3.47252	0.000515601	0.00134182	1650.27	0.496519	0.0815761	6.08657	1.15353e-09	7.50628e-09	0.490286	0.00881446
54885	ENSG00000133138	TBC1D8B	238.977	0.501545	0.147109	3.40933	0.000651219	0.00166918	512.496	0.477215	0.115737	4.12328	3.7352e-05	0.000135243	0.48938	0.0172038
23229	ENSG00000131089	ARHGEF9	399.633	0.56389	0.1291	4.36787	1.25464e-05	4.18351e-05	392.983	0.414073	0.108387	3.82032	0.000133278	0.000442976	0.488981	0.105937
23523	ENSG00000099991	CABIN1	4296.92	0.548611	0.0799743	6.85984	6.89355e-12	4.61657e-11	3261.11	0.428663	0.0634782	6.75292	1.44903e-11	1.14754e-10	0.488637	0.084816
6709	ENSG00000197694	SPTAN1	12396.5	0.536613	0.0762653	7.03614	1.97639e-12	1.39269e-11	12970.9	0.439293	0.0553159	7.94153	1.9971e-15	2.22399e-14	0.487953	0.0688159
284802	ENSG00000149531	FRG1BP	363.544	0.565804	0.131649	4.29784	1.72471e-05	5.63896e-05	370.865	0.403912	0.110259	3.66332	0.000248971	0.000787751	0.484858	0.114475
3800	ENSG00000168280	KIF5C	241.807	0.542524	0.177951	3.04872	0.00229815	0.00534984	286.11	0.426722	0.129133	3.30452	0.000951377	0.00268492	0.484623	0.0818842
22949	ENSG00000106853	PTGR1	1733.57	0.473953	0.088346	5.36474	8.10677e-08	3.60394e-07	883.418	0.494741	0.0804588	6.149	7.79727e-10	5.16514e-09	0.484347	0.0146994
11158	ENSG00000079974	RABL2B	442.915	0.46279	0.126486	3.65883	0.000253371	0.000697325	264.266	0.505109	0.130877	3.85942	0.000113657	0.000383026	0.48395	0.0299236
54968	ENSG00000175606	TMEM70	368.661	0.509931	0.126809	4.02127	5.7886e-05	0.00017527	601.998	0.454812	0.0997497	4.55953	5.12686e-06	2.1186e-05	0.482371	0.0389751
6397	ENSG00000129657	SEC14L1	3324.61	0.467368	0.0833978	5.60408	2.09367e-08	1.00177e-07	6825.92	0.494393	0.0698044	7.08254	1.41531e-12	1.23027e-11	0.48088	0.0191096
55737	ENSG00000069329	VPS35	6988.03	0.445395	0.105919	4.20507	2.61007e-05	8.31426e-05	6497.25	0.513721	0.0673858	7.62358	2.46738e-14	2.49091e-13	0.479558	0.0483141
127396	ENSG00000117010	ZNF684	430.064	0.517533	0.122773	4.21538	2.49354e-05	7.95986e-05	133.43	0.43621	0.173649	2.51203	0.012004	0.0264735	0.476872	0.0575045
23264	ENSG00000100403	ZC3H7B	7815.99	0.475175	0.0836495	5.68054	1.34266e-08	6.58694e-08	9254.47	0.4774	0.0665076	7.17813	7.0669e-13	6.32275e-12	0.476288	0.00157376
56479	ENSG00000185760	KCNQ5	2733.23	0.402867	0.0788501	5.10928	3.23388e-07	1.33261e-06	2237.02	0.544049	0.0781527	6.96137	3.36988e-12	2.8262e-11	0.473458	0.099831
85440	ENSG00000116641	DOCK7	6978.88	0.420696	0.0818239	5.14148	2.72582e-07	1.13344e-06	6564.62	0.523147	0.0646894	8.08705	6.11274e-16	7.11528e-15	0.471921	0.0724435
57701	ENSG00000167566	NCKAP5L	4641.2	0.535647	0.0740869	7.22998	4.83074e-13	3.62006e-12	3945.97	0.405281	0.076211	5.31789	1.0498e-07	5.49593e-07	0.470464	0.0921823
9270	ENSG00000119185	ITGB1BP1	1992.87	0.529731	0.0890395	5.94939	2.69143e-09	1.41597e-08	2132.43	0.410944	0.0675649	6.08222	1.18532e-09	7.70694e-09	0.470338	0.0839946
5598	ENSG00000166484	MAPK7	497.277	0.498443	0.120899	4.12281	3.7428e-05	0.000116596	673.177	0.435068	0.0888806	4.89497	9.83194e-07	4.5232e-06	0.466756	0.0448132
135112	ENSG00000111912	NCOA7	1716.56	0.428833	0.103065	4.16082	3.17109e-05	9.96694e-05	2259.13	0.497618	0.0739241	6.73147	1.67956e-11	1.3217e-10	0.463226	0.0486387
26269	ENSG00000164117	FBXO8	349.868	0.474724	0.133286	3.56171	0.000368453	0.0009843	325.233	0.449623	0.113442	3.96346	7.38718e-05	0.00025647	0.462174	0.0177492
9925	ENSG00000168795	ZBTB5	722.687	0.450974	0.107497	4.19523	2.72592e-05	8.65956e-05	557.722	0.469775	0.0963268	4.87688	1.07776e-06	4.92193e-06	0.460374	0.0132938
5297	ENSG00000241973	PI4KA	3463.31	0.449571	0.0840751	5.34725	8.92991e-08	3.95475e-07	4201.22	0.462902	0.0635033	7.28943	3.1128e-13	2.87552e-12	0.456237	0.00942675
9204	ENSG00000163867	ZMYM6	1157.4	0.501634	0.0935772	5.36065	8.29248e-08	3.68108e-07	855.497	0.408035	0.105638	3.86257	0.000112202	0.000378594	0.454835	0.0661843
1515	ENSG00000136943	CTSV	1331.29	0.433649	0.0937154	4.6273	3.7046e-06	1.33417e-05	1106.91	0.474095	0.0805572	5.8852	3.9758e-09	2.45502e-08	0.453872	0.0285994
51230	ENSG00000025293	PHF20	2467.34	0.499646	0.0901168	5.54442	2.94927e-08	1.38786e-07	1832.65	0.405375	0.0741231	5.46894	4.5274e-08	2.47913e-07	0.45251	0.0666596
80167	ENSG00000164074	C4orf29	285.617	0.458984	0.136476	3.36312	0.000770678	0.00194959	240.328	0.444996	0.14205	3.13268	0.00173219	0.00465375	0.45199	0.00989121
5575	ENSG00000188191	PRKAR1B	1638.81	0.433069	0.132639	3.26503	0.00109452	0.00269093	449.877	0.46966	0.108097	4.34482	1.39392e-05	5.43577e-05	0.451365	0.0258738
51275	ENSG00000234608	MAPKAPK5-AS1	394.17	0.440525	0.120388	3.65922	0.000252985	0.000696389	276.373	0.458114	0.126872	3.61084	0.000305205	0.000947545	0.44932	0.0124376
148189	ENSG00000261824	LINC00662	197.551	0.486811	0.190143	2.56023	0.0104602	0.0213368	152.492	0.410778	0.158556	2.59075	0.00957662	0.0216627	0.448795	0.0537633
7566	ENSG00000154957	ZNF18	250.229	0.445363	0.151214	2.94525	0.00322693	0.00729838	329.867	0.451006	0.120351	3.74742	0.000178664	0.000579558	0.448185	0.00399011
91137	ENSG00000164209	SLC25A46	3101.3	0.411735	0.092148	4.4682	7.88817e-06	2.70301e-05	3140.44	0.483684	0.0675866	7.15651	8.27539e-13	7.36332e-12	0.44771	0.0508758
51136	ENSG00000189050	RNFT1	1057.36	0.41195	0.0956643	4.3062	1.6608e-05	5.44652e-05	1825.62	0.483278	0.0741651	6.51624	7.20906e-11	5.29743e-10	0.447614	0.0504362
5339	ENSG00000178209	PLEC	3694.07	0.480506	0.105558	4.55207	5.31202e-06	1.8642e-05	11248.4	0.410299	0.0802912	5.11014	3.21915e-07	1.57583e-06	0.445403	0.0496433
2297	ENSG00000251493	FOXD1	244.157	0.450902	0.159296	2.83059	0.00464616	0.0101911	138.568	0.429275	0.159108	2.69801	0.00697561	0.0163183	0.440089	0.0152925
1857	ENSG00000161202	DVL3	8107.38	0.433485	0.077953	5.56086	2.68455e-08	1.26962e-07	5186.31	0.443294	0.0660629	6.71018	1.94383e-11	1.51641e-10	0.43839	0.00693573
729082	ENSG00000247556	OIP5-AS1	1895.55	0.457147	0.086449	5.28805	1.23624e-07	5.36486e-07	947.984	0.419305	0.087116	4.81318	1.48549e-06	6.66928e-06	0.438226	0.0267584
6257	ENSG00000204231	RXRB	1344.69	0.433411	0.117189	3.69839	0.000216969	0.000603734	810.801	0.420597	0.0924491	4.54949	5.37756e-06	2.21712e-05	0.427004	0.00906121
51231	ENSG00000105053	VRK3	1095.76	0.444052	0.0970636	4.57486	4.76541e-06	1.68647e-05	757.251	0.407219	0.0852625	4.77606	1.78762e-06	7.93363e-06	0.425636	0.0260451
23741	ENSG00000255302	EID1	12791.5	0.408916	0.0786361	5.2001	1.9918e-07	8.42364e-07	6977.78	0.437792	0.0633808	6.90732	4.93888e-12	4.07873e-11	0.423354	0.0204183
5455	ENSG00000198914	POU3F3	870.476	0.415577	0.143972	2.88652	0.0038953	0.00865844	381.309	0.422388	0.107358	3.9344	8.34056e-05	0.00028717	0.418982	0.00481568
55848	ENSG00000107020	PLGRKT	504.372	0.416577	0.121661	3.42408	0.000616885	0.00158629	202.436	0.419081	0.137485	3.04821	0.00230212	0.00602216	0.417829	0.00177073
4628	ENSG00000133026	MYH10	21280.4	0.414017	0.0855249	4.8409	1.29252e-06	4.94095e-06	18091.1	0.40382	0.0635261	6.35676	2.06053e-10	1.4516e-09	0.408919	0.00721073
6143	ENSG00000108298	RPL19	19680.1	-0.402383	0.078046	-5.15572	2.52658e-07	1.0567e-06	14336.2	-0.402343	0.0647572	-6.21309	5.19511e-10	3.51027e-09	-0.402363	2.84896e-05
2961	ENSG00000197265	GTF2E2	1142.97	-0.423206	0.0975859	-4.33675	1.44603e-05	4.78896e-05	1378.04	-0.410199	0.0732666	-5.59873	2.15932e-08	1.22677e-07	-0.416703	0.00919687
51042	ENSG00000142684	ZNF593	410.94	-0.400658	0.165836	-2.41599	0.0156924	0.0306883	394.926	-0.43277	0.145526	-2.97383	0.00294109	0.00750937	-0.416714	0.0227063
6128	ENSG00000089009	RPL6	15174.5	-0.434107	0.0821146	-5.2866	1.24608e-07	5.40445e-07	8567.08	-0.403786	0.0598059	-6.75161	1.46209e-11	1.15675e-10	-0.418947	0.0214402
1495	ENSG00000044115	CTNNA1	9059.86	-0.412335	0.0787516	-5.23589	1.6419e-07	7.02044e-07	11282.8	-0.426846	0.0543608	-7.8521	4.09144e-15	4.43732e-14	-0.419591	0.010261
4170	ENSG00000143384	MCL1	6862.7	-0.40028	0.0939849	-4.25898	2.05363e-05	6.64112e-05	6253.7	-0.454134	0.0708581	-6.40907	1.46412e-10	1.04507e-09	-0.427207	0.0380809
23545	ENSG00000185344	ATP6V0A2	1355.69	-0.46303	0.104293	-4.43969	9.00889e-06	3.06964e-05	1706.08	-0.407354	0.0688472	-5.91678	3.28296e-09	2.04513e-08	-0.435192	0.0393689
83440	ENSG00000159322	ADPGK	1418.97	-0.419447	0.0898316	-4.66926	3.02292e-06	1.10153e-05	1421.41	-0.454374	0.0748824	-6.06783	1.29649e-09	8.38942e-09	-0.43691	0.0246972
8550	ENSG00000089022	MAPKAPK5	1079.39	-0.479616	0.103611	-4.629	3.67444e-06	1.32425e-05	1134	-0.403023	0.0785414	-5.13134	2.87681e-07	1.41896e-06	-0.441319	0.0541595
27042	ENSG00000117597	DIEXF	1374.21	-0.421328	0.108149	-3.8958	9.78741e-05	0.00028681	1424.23	-0.477105	0.0783617	-6.0885	1.13972e-09	7.42238e-09	-0.449217	0.0394405
4857	ENSG00000139910	NOVA1	225.108	-0.407178	0.15003	-2.71397	0.0066482	0.0141055	219.111	-0.493998	0.137367	-3.5962	0.000322899	0.00099865	-0.450588	0.0613907
10557	ENSG00000152464	RPP38	361.61	-0.481846	0.127538	-3.77807	0.000158051	0.000448122	313.956	-0.422957	0.114818	-3.68372	0.000229855	0.000731841	-0.452401	0.0416404
902	ENSG00000134480	CCNH	1819.01	-0.506976	0.0968743	-5.23334	1.66473e-07	7.106e-07	1394.11	-0.40384	0.0773253	-5.22261	1.76418e-07	8.95521e-07	-0.455408	0.0729286
6130	ENSG00000148303	RPL7A	18425	-0.50371	0.0721291	-6.98344	2.88033e-12	1.99982e-11	12994.7	-0.410272	0.0690293	-5.94345	2.79085e-09	1.75001e-08	-0.456991	0.0660704
7013	ENSG00000147601	TERF1	961.53	-0.4962	0.102908	-4.82176	1.42299e-06	5.39734e-06	1268.16	-0.42794	0.074658	-5.73201	9.92497e-09	5.87771e-08	-0.46207	0.0482669
26608	ENSG00000106638	TBL2	885.913	-0.400476	0.0977152	-4.0984	4.1601e-05	0.000128694	1534.2	-0.524647	0.0772219	-6.79402	1.09052e-11	8.74736e-11	-0.462562	0.087802
30011	ENSG00000147010	SH3KBP1	2099.98	-0.463059	0.0816805	-5.66915	1.43509e-08	7.01081e-08	3710.4	-0.468073	0.061952	-7.55541	4.17529e-14	4.12765e-13	-0.465566	0.0035457
144404	ENSG00000188735	TMEM120B	929.603	-0.441907	0.100305	-4.40563	1.05479e-05	3.55795e-05	1163.91	-0.489378	0.0786127	-6.22517	4.81029e-10	3.2625e-09	-0.465642	0.0335667
11146	ENSG00000174842	GLMN	766.417	-0.531061	0.126802	-4.18812	2.81276e-05	8.91485e-05	196.327	-0.401775	0.149368	-2.68983	0.00714884	0.0166786	-0.466418	0.0914192
3455	ENSG00000159110	IFNAR2	475.638	-0.520308	0.119241	-4.3635	1.27998e-05	4.26332e-05	570.842	-0.413377	0.0951003	-4.34675	1.38172e-05	5.39472e-05	-0.466842	0.0756118
84159	ENSG00000150347	ARID5B	1746.17	-0.430844	0.0974612	-4.42067	9.83967e-06	3.33543e-05	2053.21	-0.505335	0.0818267	-6.17567	6.58836e-10	4.38944e-09	-0.468089	0.0526731
133015	ENSG00000163138	PACRGL	463.531	-0.538035	0.12801	-4.20308	2.63307e-05	8.38046e-05	644.392	-0.407271	0.0882559	-4.61466	3.93745e-06	1.65969e-05	-0.472653	0.0924646
114049	ENSG00000071462	WBSCR22	2463.42	-0.476471	0.0929361	-5.12687	2.94606e-07	1.21999e-06	5363.31	-0.476947	0.0568536	-8.38905	4.90107e-17	6.1512e-16	-0.476709	0.000336874
151176	ENSG00000178752	FAM132B	709.36	-0.56275	0.140467	-4.00629	6.16795e-05	0.000185937	229.525	-0.400394	0.144016	-2.78021	0.00543244	0.0130325	-0.481572	0.114803
348180	ENSG00000174177	CTU2	271.207	-0.478765	0.141721	-3.37823	0.000729548	0.00185236	381.279	-0.486867	0.116633	-4.17434	2.98846e-05	0.000109875	-0.482816	0.00572889
79751	ENSG00000177542	SLC25A22	601.364	-0.486676	0.105982	-4.59207	4.38872e-06	1.56083e-05	1086.83	-0.481098	0.0815811	-5.89718	3.69763e-09	2.29287e-08	-0.483887	0.00394366
57222	ENSG00000113719	ERGIC1	3410.9	-0.450462	0.0791186	-5.6935	1.24461e-08	6.1278e-08	4048.17	-0.51743	0.068621	-7.5404	4.68534e-14	4.61219e-13	-0.483946	0.0473535
151636	ENSG00000163840	DTX3L	946.652	-0.552587	0.104156	-5.30538	1.12438e-07	4.91186e-07	2430.21	-0.426837	0.0681402	-6.2641	3.74992e-10	2.56263e-09	-0.489712	0.0889187
126382	ENSG00000184162	NR2C2AP	180.79	-0.548623	0.168909	-3.24804	0.00116205	0.00284166	223.394	-0.43305	0.136589	-3.17046	0.00152197	0.00413142	-0.490836	0.0817223
143279	ENSG00000165338	HECTD2	325.338	-0.410321	0.15305	-2.68097	0.00734095	0.0154646	582.401	-0.572195	0.100294	-5.70519	1.16212e-08	6.81497e-08	-0.491258	0.114462
55621	ENSG00000104907	TRMT1	1318.88	-0.581104	0.101516	-5.72423	1.03901e-08	5.15076e-08	965.196	-0.40149	0.0883549	-4.54406	5.5181e-06	2.27217e-05	-0.491297	0.127006
113878	ENSG00000091073	DTX2	427.699	-0.567507	0.125535	-4.5207	6.1636e-06	2.14562e-05	599.958	-0.416068	0.0943439	-4.41012	1.03314e-05	4.0969e-05	-0.491787	0.107084
26973	ENSG00000110172	CHORDC1	7928.26	-0.572629	0.141905	-4.0353	5.45324e-05	0.000165747	3901.58	-0.420697	0.082824	-5.07941	3.78617e-07	1.8395e-06	-0.496663	0.107432
116150	ENSG00000153989	NUS1	1897.15	-0.517741	0.103143	-5.01966	5.17633e-07	2.08196e-06	1283.32	-0.476319	0.0748299	-6.36536	1.94837e-10	1.37498e-09	-0.49703	0.0292902
51118	ENSG00000183520	UTP11L	4515.26	-0.516158	0.114107	-4.52347	6.08331e-06	2.1206e-05	1731.94	-0.47871	0.0709552	-6.74666	1.51291e-11	1.1952e-10	-0.497434	0.02648
6155	ENSG00000131469	RPL27	8786.25	-0.513555	0.0949153	-5.41067	6.27908e-08	2.82886e-07	6088.17	-0.486754	0.0698953	-6.96405	3.30633e-12	2.77721e-11	-0.500155	0.0189511
55353	ENSG00000104341	LAPTM4B	3815.81	-0.57528	0.0877801	-6.55365	5.61491e-11	3.44577e-10	7233.66	-0.427832	0.0660534	-6.47706	9.3526e-11	6.79552e-10	-0.501556	0.104261
2643	ENSG00000131979	GCH1	448.226	-0.493656	0.13731	-3.59521	0.000324135	0.000875032	262.557	-0.509863	0.131405	-3.8801	0.000104414	0.000354457	-0.50176	0.0114598
55686	ENSG00000118242	MREG	426.427	-0.530834	0.12511	-4.24294	2.20615e-05	7.09941e-05	2281.49	-0.473327	0.0679955	-6.96116	3.37488e-12	2.82893e-11	-0.50208	0.0406633
100093630	ENSG00000269893	SNHG8	346.053	-0.505383	0.157567	-3.20741	0.00133934	0.00324633	256.296	-0.499778	0.129583	-3.85682	0.000114874	0.000386804	-0.502581	0.0039635
65244	ENSG00000123352	SPATS2	1056.14	-0.511608	0.102263	-5.00286	5.64851e-07	2.25985e-06	2249.27	-0.493562	0.0730827	-6.75347	1.44354e-11	1.14375e-10	-0.502585	0.012761
1893	ENSG00000143369	ECM1	5934.61	-0.604136	0.106626	-5.66594	1.46221e-08	7.13404e-08	7557.45	-0.405602	0.0761518	-5.32623	1.00274e-07	5.25978e-07	-0.504869	0.140385
51121	ENSG00000037241	RPL26L1	384.241	-0.41916	0.130652	-3.20822	0.00133558	0.00323827	421.756	-0.591822	0.109595	-5.40008	6.66097e-08	3.58246e-07	-0.505491	0.12209
1725	ENSG00000095059	DHPS	1057.51	-0.507339	0.0969294	-5.23411	1.65782e-07	7.08051e-07	867.247	-0.504003	0.0882921	-5.70835	1.14075e-08	6.69693e-08	-0.505671	0.00235908
55093	ENSG00000156795	WDYHV1	220.831	-0.531691	0.151497	-3.50959	0.000448795	0.00117872	249.7	-0.483271	0.129204	-3.74038	0.000183744	0.000594726	-0.507481	0.0342381
9317	ENSG00000165983	PTER	1046.46	-0.529402	0.117323	-4.51234	6.41155e-06	2.22885e-05	615.375	-0.487091	0.0922426	-5.28054	1.28801e-07	6.66336e-07	-0.508246	0.0299184
55122	ENSG00000135334	AKIRIN2	843.102	-0.509674	0.146889	-3.4698	0.00052085	0.00135441	431.468	-0.510106	0.110742	-4.60623	4.10027e-06	1.7216e-05	-0.50989	0.000305343
3428	ENSG00000163565	IFI16	9563.9	-0.442613	0.103134	-4.29165	1.77351e-05	5.78851e-05	10132.7	-0.582296	0.0653534	-8.90997	5.10474e-19	7.46499e-18	-0.512455	0.0987711
3621	ENSG00000153487	ING1	871.057	-0.586384	0.122161	-4.80007	1.58608e-06	5.974e-06	696.657	-0.441466	0.0901077	-4.89932	9.61689e-07	4.43055e-06	-0.513925	0.102472
6560	ENSG00000124067	SLC12A4	376.221	-0.545729	0.13239	-4.12214	3.75362e-05	0.000116909	663.674	-0.482175	0.0987779	-4.8814	1.05334e-06	4.81988e-06	-0.513952	0.0449395
23136	ENSG00000082397	EPB41L3	2241.73	-0.43537	0.101517	-4.28863	1.79778e-05	5.86265e-05	4974.68	-0.60309	0.0640526	-9.41555	4.70599e-21	7.75699e-20	-0.51923	0.118597
117178	ENSG00000117155	SSX2IP	3973.94	-0.569954	0.104988	-5.42873	5.67578e-08	2.56854e-07	1019.7	-0.473946	0.0806615	-5.87574	4.20964e-09	2.59251e-08	-0.52195	0.0678877
5520	ENSG00000221914	PPP2R2A	2272.38	-0.612446	0.0904069	-6.77433	1.24982e-11	8.13214e-11	1989.82	-0.438212	0.0685986	-6.38806	1.68003e-10	1.19288e-09	-0.525329	0.123202
5351	ENSG00000083444	PLOD1	2952.1	-0.601111	0.0841004	-7.14754	8.83476e-13	6.4887e-12	3947.85	-0.451643	0.0628619	-7.18468	6.73649e-13	6.04382e-12	-0.526377	0.10569
3688	ENSG00000150093	ITGB1	10261	-0.602921	0.0967709	-6.2304	4.65249e-10	2.64171e-09	13209.7	-0.45386	0.0594073	-7.6398	2.17561e-14	2.20873e-13	-0.52839	0.105403
7264	ENSG00000104522	TSTA3	776.797	-0.64787	0.110819	-5.84619	5.02964e-09	2.57705e-08	939.926	-0.421232	0.0786177	-5.35798	8.41554e-08	4.47219e-07	-0.534551	0.160257
5912	ENSG00000181467	RAP2B	7665.16	-0.668254	0.0929425	-7.18997	6.48034e-13	4.81328e-12	5481.54	-0.401003	0.066959	-5.98878	2.11425e-09	1.33869e-08	-0.534628	0.188975
5283	ENSG00000100564	PIGH	501.075	-0.559372	0.121619	-4.59938	4.23747e-06	1.51024e-05	436.697	-0.519792	0.107551	-4.83298	1.34504e-06	6.06727e-06	-0.539582	0.0279878
388	ENSG00000143878	RHOB	1103.18	-0.457322	0.112564	-4.06278	4.84917e-05	0.000148431	760.707	-0.62318	0.0853895	-7.2981	2.91869e-13	2.70238e-12	-0.540251	0.11728
57821	ENSG00000117477	CCDC181	178.401	-0.519637	0.186512	-2.78608	0.00533505	0.0115695	107.854	-0.562601	0.189283	-2.97227	0.00295602	0.00754275	-0.541119	0.0303804
6161	ENSG00000144713	RPL32	7114.34	-0.623522	0.107375	-5.80696	6.36188e-09	3.22792e-08	5317.37	-0.467828	0.0746837	-6.26413	3.74924e-10	2.56263e-09	-0.545675	0.110092
65263	ENSG00000104524	PYCRL	221.539	-0.471324	0.15345	-3.07152	0.00212972	0.00498848	279.572	-0.623243	0.125017	-4.98528	6.18712e-07	2.92274e-06	-0.547284	0.107423
6164	ENSG00000109475	RPL34	2346.25	-0.632129	0.102827	-6.14747	7.87263e-10	4.36575e-09	1388.12	-0.466259	0.0875818	-5.32369	1.01682e-07	5.33015e-07	-0.549194	0.117288
1022	ENSG00000134058	CDK7	722.422	-0.551641	0.127541	-4.32519	1.52398e-05	5.03387e-05	743.903	-0.551135	0.0898572	-6.13346	8.59884e-10	5.6637e-09	-0.551388	0.000357189
6165	ENSG00000182899	RPL35A	12721.5	-0.540511	0.0983669	-5.49485	3.91051e-08	1.81255e-07	6060.9	-0.570014	0.0625523	-9.11259	8.04396e-20	1.23776e-18	-0.555262	0.0208617
6230	ENSG00000118181	RPS25	8846.29	-0.710404	0.101432	-7.00377	2.49158e-12	1.74192e-11	4686.22	-0.407498	0.0633016	-6.43741	1.21533e-10	8.7326e-10	-0.558951	0.214187
6133	ENSG00000163682	RPL9	4472.38	-0.644988	0.0823874	-7.82872	4.92862e-15	4.36671e-14	4720.57	-0.473468	0.0718428	-6.59034	4.38827e-11	3.28839e-10	-0.559228	0.121283
191	ENSG00000101444	AHCY	8812.95	-0.449163	0.0819616	-5.48017	4.24915e-08	1.96169e-07	9666.01	-0.671901	0.068642	-9.78847	1.26188e-22	2.33405e-21	-0.560532	0.157499
4791	ENSG00000077150	NFKB2	521.797	-0.436697	0.122258	-3.57194	0.000354344	0.000949294	530.63	-0.686398	0.0970201	-7.0748	1.49666e-12	1.29612e-11	-0.561547	0.176565
7035	ENSG00000003436	TFPI	151.922	-0.632516	0.178537	-3.54277	0.000395942	0.00105142	142.419	-0.492507	0.159083	-3.09591	0.00196212	0.00521185	-0.562512	0.0990014
9601	ENSG00000155660	PDIA4	8592	-0.680833	0.109765	-6.20267	5.55144e-10	3.13565e-09	16919.8	-0.448463	0.0534039	-8.39758	4.55786e-17	5.74717e-16	-0.564648	0.164311
79847	ENSG00000138111	TMEM180	239.005	-0.725993	0.150474	-4.82472	1.40203e-06	5.32319e-06	161.125	-0.403697	0.156777	-2.57497	0.0100249	0.0225728	-0.564845	0.227898
387066	ENSG00000203875	SNHG5	1508.93	-0.685714	0.100743	-6.80655	9.99643e-12	6.59232e-11	1034.07	-0.447477	0.0966388	-4.6304	3.64953e-06	1.54759e-05	-0.566595	0.168459
6201	ENSG00000171863	RPS7	8133.64	-0.630418	0.0968344	-6.51027	7.5016e-11	4.55918e-10	5402.85	-0.503344	0.0889439	-5.65911	1.52158e-08	8.79877e-08	-0.566881	0.0898553
10478	ENSG00000100372	SLC25A17	1001.24	-0.55847	0.102442	-5.45157	4.99283e-08	2.27652e-07	628.88	-0.578245	0.0971017	-5.95504	2.60001e-09	1.63667e-08	-0.568358	0.0139827
56172	ENSG00000154122	ANKH	1372.04	-0.427914	0.0908577	-4.70972	2.48058e-06	9.12707e-06	1205.75	-0.713584	0.0796707	-8.95667	3.34631e-19	4.96069e-18	-0.570749	0.201999
10000	ENSG00000117020	AKT3	2400.2	-0.710687	0.0952056	-7.46476	8.34521e-14	6.68103e-13	3223.31	-0.43115	0.0648749	-6.64587	3.01425e-11	2.30051e-10	-0.570919	0.197662
3646	ENSG00000104408	EIF3E	16637.6	-0.676519	0.0950565	-7.11702	1.10282e-12	8.01399e-12	14135.3	-0.466427	0.0566613	-8.23184	1.84362e-16	2.23762e-15	-0.571473	0.148558
865	ENSG00000067955	CBFB	2571.51	-0.610305	0.0988174	-6.17609	6.57086e-10	3.67847e-09	2003.93	-0.532695	0.0696334	-7.64999	2.0099e-14	2.04435e-13	-0.5715	0.0548791
221830	ENSG00000105849	TWISTNB	2471.37	-0.591207	0.123802	-4.77541	1.79341e-06	6.71307e-06	2718	-0.552052	0.0673057	-8.20216	2.36108e-16	2.84648e-15	-0.57163	0.0276873
6173	ENSG00000241343	RPL36A	172.577	-0.656213	0.193792	-3.38618	0.000708731	0.00180405	208.713	-0.487811	0.145424	-3.35441	0.000795331	0.00227963	-0.572012	0.119078
6152	ENSG00000114391	RPL24	14978.6	-0.668872	0.0981413	-6.81539	9.40062e-12	6.2184e-11	7843.61	-0.475417	0.0615322	-7.72631	1.1071e-14	1.15582e-13	-0.572144	0.136793
10848	ENSG00000104881	PPP1R13L	189.119	-0.43931	0.160963	-2.72927	0.00634753	0.0135417	89.9547	-0.705106	0.196472	-3.58884	0.000332157	0.00102488	-0.572208	0.187946
90025	ENSG00000118420	UBE3D	200.134	-0.449338	0.156391	-2.87318	0.00406366	0.00899695	92.8403	-0.69645	0.190236	-3.66099	0.000251247	0.000794131	-0.572894	0.174735
7043	ENSG00000119699	TGFB3	100.738	-0.570508	0.202494	-2.8174	0.00484144	0.0105871	193.82	-0.575567	0.156382	-3.68053	0.000232751	0.000740481	-0.573037	0.00357761
3998	ENSG00000074695	LMAN1	6733.71	-0.511483	0.101994	-5.01484	5.3079e-07	2.13318e-06	8253.54	-0.639282	0.0615722	-10.3826	2.97414e-25	6.42533e-24	-0.575383	0.0903677
56034	ENSG00000145431	PDGFC	208.55	-0.680086	0.186063	-3.65513	0.000257054	0.000706815	107.852	-0.470898	0.180285	-2.61197	0.00900228	0.0204722	-0.575492	0.147918
9818	ENSG00000139496	NUPL1	4205.55	-0.592677	0.110957	-5.34153	9.21671e-08	4.06865e-07	4077.72	-0.560944	0.0626937	-8.94738	3.64034e-19	5.37155e-18	-0.57681	0.022439
2135	ENSG00000162694	EXTL2	1281.8	-0.691696	0.0968136	-7.14461	9.02509e-13	6.61563e-12	566.99	-0.466844	0.0949387	-4.91732	8.77383e-07	4.06062e-06	-0.57927	0.158994
5793	ENSG00000144724	PTPRG	1095.06	-0.756014	0.103527	-7.30257	2.82314e-13	2.15514e-12	2678.04	-0.403087	0.0725345	-5.55717	2.74184e-08	1.53776e-07	-0.57955	0.249557
6125	ENSG00000122406	RPL5	32660.1	-0.711067	0.0715754	-9.93453	2.94574e-23	4.70664e-22	9080.07	-0.452612	0.0651247	-6.94993	3.65469e-12	3.05085e-11	-0.58184	0.182755
29841	ENSG00000134317	GRHL1	112.839	-0.570205	0.200902	-2.83822	0.00453659	0.00997389	134.266	-0.602332	0.170399	-3.53484	0.000408026	0.00123945	-0.586268	0.0227168
23240	ENSG00000121210	KIAA0922	813.846	-0.778794	0.116443	-6.68821	2.25924e-11	1.44452e-10	716.293	-0.400662	0.0912912	-4.38883	1.13963e-05	4.50486e-05	-0.589728	0.26738
441212	ENSG00000205763	RP9P	197.168	-0.717946	0.166443	-4.31346	1.6072e-05	5.28796e-05	177.572	-0.461984	0.15648	-2.95234	0.00315372	0.00799434	-0.589965	0.180993
6218	ENSG00000182774	RPS17	25954.3	-0.681793	0.0955518	-7.13532	9.65613e-13	7.06107e-12	13105	-0.503389	0.0649648	-7.74864	9.28828e-15	9.7536e-14	-0.592591	0.126151
80178	ENSG00000162062	C16orf59	293.609	-0.684388	0.151758	-4.50972	6.49129e-06	2.25295e-05	248.434	-0.502071	0.138496	-3.62515	0.000288789	0.000900564	-0.593229	0.128917
91010	ENSG00000161791	FMNL3	596.377	-0.756171	0.118814	-6.36435	1.9612e-10	1.15434e-09	855.062	-0.430723	0.0810752	-5.31264	1.08051e-07	5.64577e-07	-0.593447	0.230126
79140	ENSG00000160050	CCDC28B	177.064	-0.724966	0.199653	-3.63113	0.000282182	0.00076975	79.2791	-0.466817	0.206145	-2.26451	0.0235427	0.0479464	-0.595892	0.182539
64425	ENSG00000137054	POLR1E	941.107	-0.610233	0.119231	-5.1181	3.08635e-07	1.27549e-06	737.521	-0.58835	0.0940038	-6.25879	3.87983e-10	2.65029e-09	-0.599292	0.0154741
11072	ENSG00000276023	DUSP14	530.177	-0.441701	0.125279	-3.52574	0.000422304	0.00111593	919.505	-0.757393	0.0825952	-9.16995	4.73259e-20	7.42325e-19	-0.599547	0.223228
79929	ENSG00000180834	MAP6D1	235.215	-0.503332	0.154988	-3.24756	0.001164	0.00284597	145.33	-0.702882	0.158976	-4.4213	9.81085e-06	3.90099e-05	-0.603107	0.141103
4783	ENSG00000165030	NFIL3	585.842	-0.746163	0.108421	-6.88212	5.89693e-12	3.96495e-11	519.925	-0.464488	0.098104	-4.73464	2.1944e-06	9.61257e-06	-0.605325	0.199175
5621	ENSG00000171867	PRNP	2089.67	-0.519211	0.097743	-5.312	1.08431e-07	4.74916e-07	4566.91	-0.692508	0.0702812	-9.8534	6.6264e-23	1.24701e-21	-0.60586	0.12254
6936	ENSG00000005436	GCFC2	1111.1	-0.64044	0.116357	-5.50412	3.71025e-08	1.72555e-07	696.227	-0.573391	0.0957101	-5.99091	2.08665e-09	1.32225e-08	-0.606916	0.047411
11224	ENSG00000136942	RPL35	9742.04	-0.646299	0.104641	-6.17635	6.56017e-10	3.67384e-09	9420.48	-0.567664	0.0637938	-8.89842	5.66463e-19	8.23176e-18	-0.606981	0.0556032
10351	ENSG00000141338	ABCA8	244.521	-0.494903	0.160317	-3.08702	0.00202174	0.00475398	438.484	-0.723925	0.114551	-6.31966	2.62141e-10	1.82217e-09	-0.609414	0.161943
90861	ENSG00000206053	HN1L	2419.64	-0.705099	0.0910062	-7.7478	9.34949e-15	8.10772e-14	2572.67	-0.514231	0.0629934	-8.16325	3.26134e-16	3.88555e-15	-0.609665	0.134964
64112	ENSG00000165943	MOAP1	1290.68	-0.48392	0.105092	-4.60475	4.12971e-06	1.47566e-05	1004.4	-0.735517	0.0776359	-9.47393	2.69519e-21	4.52071e-20	-0.609718	0.177906
6129	ENSG00000147604	RPL7	7210.35	-0.70384	0.0966602	-7.28159	3.29902e-13	2.50199e-12	8094.35	-0.520657	0.0692287	-7.52083	5.44302e-14	5.34505e-13	-0.612249	0.12953
10644	ENSG00000073792	IGF2BP2	11858.2	-0.650596	0.0724959	-8.97426	2.85272e-19	3.51704e-18	6066.6	-0.574526	0.0631646	-9.09569	9.39865e-20	1.43938e-18	-0.612561	0.0537902
3198	ENSG00000105991	HOXA1	318.972	-0.610332	0.147887	-4.12702	3.67497e-05	0.000114648	327.629	-0.619151	0.12627	-4.90338	9.42003e-07	4.34109e-06	-0.614741	0.00623631
3921	ENSG00000168028	RPSA	6359.36	-0.765971	0.097315	-7.87104	3.51704e-15	3.14929e-14	6986.3	-0.463935	0.0722924	-6.41747	1.38553e-10	9.90286e-10	-0.614953	0.213571
5445	ENSG00000105854	PON2	2912.24	-0.642806	0.104029	-6.17911	6.44642e-10	3.6155e-09	5449.29	-0.589864	0.0630912	-9.34938	8.81634e-21	1.43281e-19	-0.616335	0.037436
256227	ENSG00000105889	STEAP1B	313.079	-0.666573	0.183882	-3.625	0.000288959	0.000786391	574.371	-0.568794	0.100493	-5.66004	1.51336e-08	8.76375e-08	-0.617684	0.0691403
3074	ENSG00000049860	HEXB	3932.63	-0.792834	0.0992082	-7.99162	1.33181e-15	1.23575e-14	8369.86	-0.444715	0.054082	-8.22297	1.98527e-16	2.40413e-15	-0.618774	0.246158
83903	ENSG00000177602	GSG2	577.171	-0.837637	0.111109	-7.53888	4.7401e-14	3.88118e-13	497.329	-0.401571	0.103333	-3.88617	0.000101838	0.000346292	-0.619604	0.308345
100505865	ENSG00000246898	LINC00920	151.911	-0.726371	0.183184	-3.96525	7.33186e-05	0.000218841	68.5116	-0.516255	0.213277	-2.42058	0.0154957	0.0332155	-0.621313	0.148574
10505	ENSG00000135622	SEMA4F	319.458	-0.412548	0.162644	-2.5365	0.0111965	0.0226797	754.268	-0.830277	0.100517	-8.26004	1.4563e-16	1.7849e-15	-0.621412	0.295379
79697	ENSG00000170468	C14orf169	677.61	-0.718588	0.124925	-5.75217	8.81028e-09	4.40368e-08	748.149	-0.5246	0.0879351	-5.96576	2.435e-09	1.53579e-08	-0.621594	0.13717
3993	ENSG00000073350	LLGL2	98.1028	-0.618233	0.219751	-2.81333	0.00490308	0.0107111	170.933	-0.627002	0.152096	-4.12241	3.7493e-05	0.000135723	-0.622617	0.00620086
28972	ENSG00000114902	SPCS1	3026.99	-0.638795	0.0941636	-6.78388	1.16987e-11	7.65814e-11	3659.51	-0.607253	0.0621172	-9.77592	1.42847e-22	2.6334e-21	-0.623024	0.0223039
55222	ENSG00000172731	LRRC20	470.385	-0.779185	0.122999	-6.33491	2.37477e-10	1.38643e-09	356.832	-0.468718	0.111657	-4.19784	2.69475e-05	9.99842e-05	-0.623952	0.219533
150726	ENSG00000163013	FBXO41	424.968	-0.839918	0.133075	-6.31161	2.76156e-10	1.60419e-09	496.97	-0.408446	0.103478	-3.94718	7.90764e-05	0.000273251	-0.624182	0.305097
8013	ENSG00000119508	NR4A3	5637.4	-0.79253	0.106464	-7.44414	9.75814e-14	7.73842e-13	8133.62	-0.458316	0.0597719	-7.66774	1.75057e-14	1.79409e-13	-0.625423	0.236325
6233	ENSG00000143947	RPS27A	5772.99	-0.792818	0.0895998	-8.84844	8.87536e-19	1.05965e-17	5173.28	-0.460647	0.0704254	-6.54092	6.11427e-11	4.52372e-10	-0.626732	0.234881
23333	ENSG00000173852	DPY19L1	3894.96	-0.711211	0.115995	-6.13141	8.7105e-10	4.81386e-09	6829.94	-0.543439	0.0616129	-8.82021	1.14247e-18	1.61531e-17	-0.627325	0.118633
9353	ENSG00000145147	SLIT2	55.188	-0.628698	0.270533	-2.32393	0.0201295	0.0383244	193.358	-0.628575	0.160893	-3.90678	9.3533e-05	0.000319392	-0.628637	8.68654e-05
101929344	ENSG00000231817	LINC01198	92.3892	-0.661129	0.262412	-2.51944	0.0117543	0.0236699	83.0253	-0.597761	0.199594	-2.99489	0.00274543	0.00706107	-0.629445	0.0448078
26575	ENSG00000091844	RGS17	165.379	-0.544433	0.167841	-3.24373	0.00117974	0.00288212	37.808	-0.714808	0.270778	-2.63983	0.00829473	0.0190233	-0.62962	0.120473
79943	ENSG00000185730	ZNF696	191.247	-0.68298	0.167863	-4.06868	4.72806e-05	0.000145047	319.632	-0.576793	0.123679	-4.66362	3.1069e-06	1.32931e-05	-0.629886	0.0750853
157657	ENSG00000156172	C8orf37	143.813	-0.837526	0.178511	-4.69173	2.70906e-06	9.92667e-06	293.614	-0.423043	0.128737	-3.2861	0.00101585	0.00284821	-0.630284	0.293084
81542	ENSG00000139921	TMX1	3239.26	-0.75836	0.130444	-5.8137	6.11056e-09	3.10249e-08	2432.34	-0.50669	0.0688876	-7.35531	1.9048e-13	1.79127e-12	-0.632525	0.177958
57613	ENSG00000084444	KIAA1467	714.159	-0.702091	0.139288	-5.04056	4.64167e-07	1.88144e-06	679.495	-0.563005	0.0894636	-6.29312	3.1115e-10	2.14237e-09	-0.632548	0.0983484
246777	ENSG00000258484	SPESP1	3701.06	-0.784992	0.0876073	-8.96035	3.2364e-19	3.98032e-18	2146.1	-0.481927	0.071549	-6.73563	1.63227e-11	1.28574e-10	-0.633459	0.214299
26084	ENSG00000114790	ARHGEF26	763.104	-0.709356	0.100723	-7.04266	1.88607e-12	1.33215e-11	1397.82	-0.567642	0.0837036	-6.78157	1.18876e-11	9.49307e-11	-0.638499	0.100207
22859	ENSG00000072071	ADGRL1	1975.06	-0.717616	0.128137	-5.60037	2.13899e-08	1.02248e-07	1663.43	-0.559947	0.0858674	-6.52106	6.98121e-11	5.13932e-10	-0.638781	0.111489
8676	ENSG00000135604	STX11	471.355	-0.450931	0.135262	-3.33377	0.000856766	0.0021444	194.281	-0.827526	0.142168	-5.82076	5.85824e-09	3.56712e-08	-0.639229	0.266293
10536	ENSG00000110811	P3H3	331.207	-0.739143	0.130284	-5.67333	1.40047e-08	6.85497e-08	210.112	-0.539396	0.13534	-3.9855	6.73394e-05	0.000234494	-0.63927	0.141242
4241	ENSG00000163975	MFI2	4100.87	-0.772408	0.126928	-6.08538	1.16217e-09	6.34846e-09	7992.69	-0.507579	0.0599946	-8.4604	2.66451e-17	3.421e-16	-0.639993	0.187262
8496	ENSG00000110841	PPFIBP1	2418.39	-0.815569	0.0826196	-9.87138	5.53971e-23	8.67696e-22	2327.93	-0.466295	0.0704916	-6.6149	3.71801e-11	2.81246e-10	-0.640932	0.246974
221656	ENSG00000165097	KDM1B	3501.47	-0.510217	0.0949762	-5.37205	7.78478e-08	3.46487e-07	2584.29	-0.772947	0.0751401	-10.2867	8.08604e-25	1.69933e-23	-0.641582	0.185779
28987	ENSG00000141101	NOB1	1269.45	-0.507005	0.109235	-4.6414	3.46049e-06	1.25013e-05	944.848	-0.779119	0.0866223	-8.99444	2.37442e-19	3.5557e-18	-0.643062	0.192414
6189	ENSG00000145425	RPS3A	9753.62	-0.766896	0.0864919	-8.86669	7.5354e-19	9.03232e-18	6614.83	-0.521882	0.0644385	-8.09891	5.54542e-16	6.48754e-15	-0.644389	0.173252
4833	ENSG00000103202	NME4	2579.4	-0.769296	0.0885386	-8.68882	3.66219e-18	4.17137e-17	2646.14	-0.522637	0.078564	-6.65237	2.88405e-11	2.20842e-10	-0.645967	0.174414
22903	ENSG00000132640	BTBD3	5619.57	-0.795767	0.128617	-6.1871	6.12814e-10	3.44722e-09	4016.53	-0.496308	0.0693908	-7.15236	8.53014e-13	7.57336e-12	-0.646037	0.211749
100170841	ENSG00000273604	C17orf96	147.261	-0.56304	0.177018	-3.1807	0.00146922	0.00354182	139.707	-0.730253	0.171983	-4.24608	2.1754e-05	8.19341e-05	-0.646647	0.118238
55755	ENSG00000136861	CDK5RAP2	7111.79	-0.887324	0.112457	-7.89035	3.01341e-15	2.70956e-14	14324	-0.414099	0.0623671	-6.6397	3.14315e-11	2.39776e-10	-0.650712	0.334621
57211	ENSG00000112414	ADGRG6	10652.8	-0.508533	0.106027	-4.79627	1.61644e-06	6.08226e-06	4584.38	-0.794602	0.0764247	-10.3972	2.55348e-25	5.54612e-24	-0.651567	0.202281
55740	ENSG00000154380	ENAH	2720.64	-0.875201	0.0907241	-9.64685	5.06901e-22	7.56348e-21	9581.12	-0.433498	0.061394	-7.06091	1.65411e-12	1.4241e-11	-0.654349	0.312331
170954	ENSG00000146112	PPP1R18	1912.48	-0.749971	0.103918	-7.21695	5.31677e-13	3.9705e-12	1468.27	-0.562178	0.0876175	-6.41628	1.39643e-10	9.97636e-10	-0.656074	0.132789
55775	ENSG00000042088	TDP1	600.246	-0.89638	0.105897	-8.46465	2.56933e-17	2.6913e-16	411.92	-0.421784	0.109916	-3.83733	0.000124379	0.000416646	-0.659082	0.33559
84456	ENSG00000198945	L3MBTL3	308.046	-0.639923	0.136028	-4.70434	2.54688e-06	9.35505e-06	442.27	-0.679777	0.134495	-5.05428	4.32019e-07	2.08582e-06	-0.65985	0.0281812
79572	ENSG00000133657	ATP13A3	8821.89	-0.632204	0.161528	-3.91389	9.08217e-05	0.000267128	5627.72	-0.691261	0.0657123	-10.5195	7.0232e-26	1.57613e-24	-0.661733	0.0417595
26018	ENSG00000144749	LRIG1	372.746	-0.7551	0.12777	-5.90985	3.42413e-09	1.78283e-08	459.484	-0.570998	0.111286	-5.13092	2.88333e-07	1.42138e-06	-0.663049	0.13018
55011	ENSG00000104872	PIH1D1	1527.3	-0.845514	0.0846924	-9.98334	1.80288e-23	2.92074e-22	771.528	-0.480854	0.0848379	-5.66791	1.44547e-08	8.38558e-08	-0.663184	0.257853
6204	ENSG00000124614	RPS10	176.067	-0.665032	0.177874	-3.73879	0.000184908	0.000519494	102.61	-0.663255	0.181174	-3.66088	0.000251353	0.000794202	-0.664143	0.00125692
220992	ENSG00000198298	ZNF485	99.6363	-0.697842	0.220662	-3.16249	0.00156426	0.00375477	110.276	-0.633638	0.180222	-3.51588	0.0004383	0.00132274	-0.66574	0.0453993
163071	ENSG00000178150	ZNF114	382.321	-0.661884	0.125611	-5.2693	1.36948e-07	5.90406e-07	2300.3	-0.671264	0.187047	-3.58875	0.000332273	0.0010249	-0.666574	0.00663258
6147	ENSG00000198242	RPL23A	1739.1	-0.877977	0.0966992	-9.07947	1.09106e-19	1.40114e-18	1161.87	-0.458842	0.0900535	-5.09522	3.48332e-07	1.69847e-06	-0.66841	0.296373
1723	ENSG00000102967	DHODH	513.223	-0.509412	0.136329	-3.73665	0.00018649	0.000523355	433.951	-0.828168	0.10737	-7.71322	1.22681e-14	1.27423e-13	-0.66879	0.225395
9771	ENSG00000136237	RAPGEF5	344.92	-0.793012	0.136572	-5.80655	6.37733e-09	3.23468e-08	353.122	-0.550006	0.113562	-4.84322	1.27751e-06	5.77586e-06	-0.671509	0.171831
124044	ENSG00000158792	SPATA2L	130.699	-0.75628	0.221629	-3.41237	0.000643998	0.00165179	129.498	-0.602072	0.18442	-3.26468	0.00109589	0.00305257	-0.679176	0.109042
4919	ENSG00000185483	ROR1	456.988	-0.785552	0.129917	-6.04658	1.47957e-09	8.01852e-09	336.554	-0.589974	0.120565	-4.89342	9.90986e-07	4.55775e-06	-0.687763	0.138295
51651	ENSG00000141378	PTRH2	1876.17	-0.907464	0.117928	-7.69507	1.41415e-14	1.2083e-13	2738.65	-0.468953	0.065211	-7.19132	6.41694e-13	5.76031e-12	-0.688209	0.310074
114908	ENSG00000152558	TMEM123	9925.72	-0.972082	0.101664	-9.56174	1.15796e-21	1.68533e-20	6394.94	-0.405306	0.0655017	-6.18771	6.10431e-10	4.08205e-09	-0.688694	0.400772
84629	ENSG00000182095	TNRC18	2423.64	-0.666415	0.101517	-6.56459	5.21762e-11	3.21891e-10	5902.07	-0.720357	0.0789131	-9.12848	6.94692e-20	1.07447e-18	-0.693386	0.0381424
10838	ENSG00000063587	ZNF275	643.23	-0.865882	0.11091	-7.80709	5.85218e-15	5.15176e-14	655.446	-0.523085	0.0896114	-5.83726	5.30664e-09	3.24466e-08	-0.694483	0.242394
285203	ENSG00000163378	EOGT	1684.59	-0.867541	0.10408	-8.33536	7.72623e-17	7.81673e-16	1535.03	-0.521696	0.0791386	-6.59218	4.33419e-11	3.25275e-10	-0.694618	0.24455
26229	ENSG00000149541	B3GAT3	467.535	-0.529642	0.146769	-3.60869	0.000307753	0.000832889	434.072	-0.863411	0.113742	-7.59098	3.17486e-14	3.17349e-13	-0.696527	0.23601
201164	ENSG00000179598	PLD6	139.061	-0.859275	0.187785	-4.57585	4.74301e-06	1.67894e-05	79.8777	-0.539944	0.201489	-2.67977	0.00736736	0.0171489	-0.699609	0.225801
51633	ENSG00000155100	OTUD6B	977.083	-0.792127	0.176136	-4.49725	6.88376e-06	2.37879e-05	1396.01	-0.610747	0.0932689	-6.54824	5.82185e-11	4.31723e-10	-0.701437	0.128255
114879	ENSG00000021762	OSBPL5	261.343	-0.79895	0.141278	-5.65514	1.55717e-08	7.57047e-08	422.98	-0.605377	0.114824	-5.27223	1.3478e-07	6.96154e-07	-0.702164	0.136876
6197	ENSG00000177189	RPS6KA3	3629.84	-0.752913	0.0867013	-8.68399	3.82117e-18	4.3459e-17	3446.24	-0.651506	0.0665045	-9.79643	1.1664e-22	2.15991e-21	-0.70221	0.0717054
4130	ENSG00000166963	MAP1A	183.037	-0.658893	0.177763	-3.70658	0.000210074	0.000586275	363.228	-0.747998	0.120089	-6.22872	4.70257e-10	3.19212e-09	-0.703446	0.063007
9045	ENSG00000188846	RPL14	12301.8	-0.866421	0.0791483	-10.9468	6.88317e-28	1.44298e-26	9285.1	-0.543937	0.0601188	-9.04772	1.45991e-19	2.20662e-18	-0.705179	0.22803
6144	ENSG00000122026	RPL21	5695.47	-0.929401	0.10972	-8.47065	2.44033e-17	2.56507e-16	4278.12	-0.485077	0.0658086	-7.37103	1.69317e-13	1.59781e-12	-0.707239	0.314184
122786	ENSG00000139926	FRMD6	1219.39	-0.544582	0.117297	-4.64275	3.43806e-06	1.24262e-05	2244.27	-0.871576	0.0721701	-12.0767	1.40256e-33	4.48237e-32	-0.708079	0.23122
27445	ENSG00000186472	PCLO	785.852	-0.663607	0.110011	-6.0322	1.61747e-09	8.71897e-09	12600.9	-0.753876	0.0655284	-11.5046	1.25121e-30	3.56927e-29	-0.708742	0.0638299
10195	ENSG00000214160	ALG3	2320.45	-0.594392	0.0874354	-6.79806	1.06035e-11	6.9744e-11	1645.9	-0.82834	0.0867362	-9.5501	1.29566e-21	2.23812e-20	-0.711366	0.165426
6139	ENSG00000265681	RPL17	94.8434	-0.743407	0.224547	-3.31069	0.000930655	0.00231553	93.5239	-0.683621	0.191781	-3.56459	0.00036442	0.00111705	-0.713514	0.0422753
29066	ENSG00000122299	ZC3H7A	3487.33	-0.749575	0.101838	-7.36046	1.83273e-13	1.41697e-12	2967.6	-0.68537	0.0670638	-10.2197	1.61872e-24	3.31164e-23	-0.717473	0.0453995
64785	ENSG00000181938	GINS3	570.686	-0.66105	0.140485	-4.7055	2.53249e-06	9.30446e-06	489.024	-0.777502	0.115054	-6.75773	1.40168e-11	1.11112e-10	-0.719276	0.0823439
78995	ENSG00000125319	C17orf53	370.798	-0.955781	0.134859	-7.08728	1.3677e-12	9.83948e-12	251.151	-0.491329	0.133211	-3.68836	0.000225703	0.000719893	-0.723555	0.328417
286499	ENSG00000179083	FAM133A	73.0001	-0.872144	0.240821	-3.62154	0.00029285	0.000796263	646.24	-0.576463	0.106573	-5.40908	6.33493e-08	3.4158e-07	-0.724304	0.209078
8459	ENSG00000128294	TPST2	290.781	-0.698423	0.143644	-4.86217	1.16103e-06	4.46426e-06	255.029	-0.752817	0.140395	-5.36213	8.22473e-08	4.37797e-07	-0.72562	0.0384625
10184	ENSG00000145685	LHFPL2	1789.94	-0.755844	0.0914569	-8.26448	1.40306e-16	1.39521e-15	2224.16	-0.696314	0.0683088	-10.1936	2.11709e-24	4.30404e-23	-0.726079	0.0420937
85461	ENSG00000115183	TANC1	3918.46	-0.916467	0.0823658	-11.1268	9.29231e-29	2.04742e-27	5728.1	-0.540566	0.0625664	-8.63988	5.62742e-18	7.57317e-17	-0.728517	0.265803
9124	ENSG00000107438	PDLIM1	927.273	-0.96978	0.110097	-8.80838	1.2697e-18	1.49118e-17	744.34	-0.48741	0.109771	-4.44026	8.985e-06	3.59378e-05	-0.728595	0.341087
2744	ENSG00000115419	GLS	5109.86	-1.04877	0.0956811	-10.9611	5.87994e-28	1.23949e-26	4475.58	-0.409174	0.082221	-4.97651	6.47413e-07	3.0512e-06	-0.728971	0.452261
2648	ENSG00000108773	KAT2A	1130.25	-1.00804	0.116588	-8.64621	5.32403e-18	5.96095e-17	1628.84	-0.451863	0.0841365	-5.37059	7.84779e-08	4.1842e-07	-0.729952	0.393277
2823	ENSG00000150625	GPM6A	50.2759	-0.618728	0.277274	-2.23147	0.02565	0.0475998	917.28	-0.84176	0.0846682	-9.94188	2.73624e-23	5.25924e-22	-0.730244	0.157708
2310	ENSG00000240445	FOXO3B	140.185	-0.785517	0.187474	-4.19001	2.7894e-05	8.84637e-05	73.5844	-0.676066	0.217288	-3.11139	0.0018621	0.00496653	-0.730792	0.0773939
3726	ENSG00000171223	JUNB	950.084	-0.810223	0.160963	-5.03361	4.81317e-07	1.9473e-06	537.698	-0.652423	0.0960735	-6.79088	1.11453e-11	8.93114e-11	-0.731323	0.111581
23586	ENSG00000107201	DDX58	164.771	-0.779352	0.173059	-4.50338	6.68822e-06	2.31643e-05	160.558	-0.687558	0.153469	-4.4801	7.46089e-06	3.01544e-05	-0.733455	0.0649084
51187	ENSG00000137876	RSL24D1	2468.85	-0.811291	0.109978	-7.37685	1.62083e-13	1.25958e-12	1249.35	-0.656306	0.0926169	-7.08625	1.37795e-12	1.20102e-11	-0.733799	0.10959
64761	ENSG00000059378	PARP12	309.215	-0.827383	0.135548	-6.10396	1.03471e-09	5.67888e-09	480.645	-0.640613	0.103152	-6.2104	5.28515e-10	3.5622e-09	-0.733998	0.132066
182	ENSG00000101384	JAG1	12086.5	-0.771215	0.0878168	-8.78209	1.60463e-18	1.87289e-17	2920.34	-0.697321	0.0778562	-8.95652	3.35085e-19	4.96288e-18	-0.734268	0.0522508
3430	ENSG00000068079	IFI35	389.709	-0.78838	0.154095	-5.1162	3.1175e-07	1.28676e-06	781.28	-0.688218	0.0931748	-7.38631	1.50962e-13	1.43211e-12	-0.738299	0.0708253
10052	ENSG00000182963	GJC1	2137.76	-0.965629	0.0831584	-11.6119	3.58485e-31	8.91202e-30	3298.17	-0.513689	0.0720921	-7.12546	1.03737e-12	9.12513e-12	-0.739659	0.31957
10549	ENSG00000123131	PRDX4	1348.5	-1.00916	0.0985617	-10.2388	1.32812e-24	2.30478e-23	2188.53	-0.471724	0.0745552	-6.32719	2.49671e-10	1.74072e-09	-0.740441	0.380023
10308	ENSG00000185947	ZNF267	1954.07	-0.903177	0.141957	-6.36232	1.98724e-10	1.16876e-09	1167.4	-0.578166	0.0862723	-6.70164	2.06097e-11	1.6024e-10	-0.740671	0.229818
2567	ENSG00000182256	GABRG3	177.282	-0.465603	0.184134	-2.52861	0.0114516	0.0231497	81.557	-1.01916	0.218073	-4.67351	2.961e-06	1.2726e-05	-0.742384	0.391426
57605	ENSG00000090975	PITPNM2	353.302	-0.663633	0.129837	-5.11129	3.19973e-07	1.3189e-06	286.617	-0.823492	0.127864	-6.44035	1.19199e-10	8.57577e-10	-0.743562	0.113038
677	ENSG00000185650	ZFP36L1	3817.12	-1.06916	0.075803	-14.1044	3.5657e-45	1.54872e-43	2381.47	-0.424014	0.0839156	-5.05287	4.35228e-07	2.10068e-06	-0.746587	0.456187
3776	ENSG00000082482	KCNK2	90.8132	-0.892411	0.250138	-3.56768	0.000360161	0.000963853	257.887	-0.61569	0.149132	-4.12848	3.65165e-05	0.000132455	-0.754051	0.195672
143458	ENSG00000179241	LDLRAD3	3353.05	-0.823896	0.0831103	-9.91328	3.64468e-23	5.76851e-22	3793.34	-0.687707	0.0622639	-11.045	2.31685e-28	5.89323e-27	-0.755802	0.0963003
85019	ENSG00000134490	TMEM241	197.565	-0.552271	0.15614	-3.53703	0.000404656	0.0010738	173.189	-0.960101	0.155052	-6.19213	5.93581e-10	3.98252e-09	-0.756186	0.288379
157695	ENSG00000180190	TDRP	210.649	-0.607688	0.151194	-4.01925	5.83832e-05	0.000176634	199.596	-0.916318	0.138749	-6.60415	3.99813e-11	3.01311e-10	-0.762003	0.218234
56683	ENSG00000159079	C21orf59	2857.14	-1.02857	0.11356	-9.05747	1.33515e-19	1.70158e-18	1211.82	-0.499141	0.083166	-6.00174	1.95214e-09	1.23966e-08	-0.763854	0.374361
3344	ENSG00000170802	FOXN2	1518.08	-0.938406	0.108015	-8.68774	3.69722e-18	4.20809e-17	2043.06	-0.592327	0.0863939	-6.85612	7.07537e-12	5.76672e-11	-0.765367	0.244714
976	ENSG00000123146	ADGRE5	1076.07	-0.42552	0.09202	-4.62421	3.76032e-06	1.35327e-05	907.869	-1.10661	0.083313	-13.2825	2.92373e-40	1.27347e-38	-0.766063	0.481601
151194	ENSG00000144401	METTL21A	888.839	-0.819839	0.0959446	-8.54492	1.28625e-17	1.39267e-16	412.691	-0.716328	0.103274	-6.93617	4.02869e-12	3.35449e-11	-0.768084	0.073193
41	ENSG00000110881	ASIC1	616.5	-0.934494	0.117772	-7.93479	2.10852e-15	1.91643e-14	960.502	-0.604399	0.0916585	-6.59403	4.28037e-11	3.21614e-10	-0.769447	0.233413
79833	ENSG00000152147	GEMIN6	986.007	-0.932099	0.114822	-8.1178	4.74696e-16	4.53542e-15	520.36	-0.608062	0.101368	-5.99856	1.99071e-09	1.26343e-08	-0.770081	0.229129
6533	ENSG00000131389	SLC6A6	3317.75	-0.891097	0.122373	-7.28181	3.29369e-13	2.50046e-12	2025.99	-0.651279	0.0768441	-8.47532	2.34425e-17	3.0242e-16	-0.771188	0.169577
91147	ENSG00000164953	TMEM67	358.752	-0.561061	0.155596	-3.60589	0.000311086	0.000841456	1703.48	-0.98345	0.0736215	-13.3582	1.06106e-40	4.71022e-39	-0.772256	0.298674
4780	ENSG00000116044	NFE2L2	4373.6	-0.977085	0.105932	-9.22367	2.87099e-20	3.80325e-19	5551.16	-0.567557	0.0607627	-9.34055	9.5837e-21	1.54975e-19	-0.772321	0.28958
11221	ENSG00000143507	DUSP10	974.058	-0.760556	0.114345	-6.65139	2.90336e-11	1.83616e-10	1739.65	-0.787247	0.075186	-10.4707	1.17811e-25	2.60421e-24	-0.773902	0.0188734
1123	ENSG00000128656	CHN1	608.031	-1.04636	0.111701	-9.3675	7.42687e-21	1.04328e-19	382.713	-0.502395	0.107824	-4.65941	3.17114e-06	1.35394e-05	-0.774377	0.38464
5033	ENSG00000122884	P4HA1	2022.59	-0.715524	0.102688	-6.96792	3.21661e-12	2.22309e-11	1666.9	-0.837283	0.0692776	-12.0859	1.25371e-33	4.03054e-32	-0.776403	0.0860967
10301	ENSG00000176124	DLEU1	560.682	-1.14254	0.126957	-8.99938	2.26993e-19	2.82619e-18	556.494	-0.416	0.0978436	-4.25168	2.12169e-05	8.00412e-05	-0.779268	0.513738
3915	ENSG00000135862	LAMC1	16467	-0.947456	0.0791584	-11.9691	5.15714e-33	1.40198e-31	21512.7	-0.613594	0.061168	-10.0313	1.11057e-23	2.17413e-22	-0.780525	0.236076
3795	ENSG00000138030	KHK	131.72	-0.463934	0.194542	-2.38474	0.0170911	0.033174	118.48	-1.09982	0.192841	-5.70323	1.17561e-08	6.88663e-08	-0.781874	0.449636
23500	ENSG00000146122	DAAM2	1021.06	-0.573545	0.100467	-5.7088	1.13777e-08	5.62188e-08	1108.09	-1.00278	0.0857138	-11.6991	1.28783e-31	3.82876e-30	-0.78816	0.303512
169714	ENSG00000165661	QSOX2	1434.53	-0.979933	0.10122	-9.68121	3.62404e-22	5.46135e-21	1447.08	-0.603695	0.0724848	-8.32857	8.18222e-17	1.01825e-15	-0.791814	0.26604
51477	ENSG00000105655	ISYNA1	619.228	-0.876754	0.148555	-5.9019	3.59345e-09	1.86585e-08	165.361	-0.707817	0.156108	-4.53416	5.78329e-06	2.37352e-05	-0.792285	0.119457
153090	ENSG00000136848	DAB2IP	885.537	-0.667106	0.105823	-6.30397	2.90112e-10	1.67945e-09	1933	-0.920931	0.0760937	-12.1026	1.02326e-33	3.31598e-32	-0.794019	0.179481
54434	ENSG00000084112	SSH1	4372.58	-0.439836	0.0911394	-4.82597	1.39325e-06	5.29251e-06	14555.1	-1.16632	0.0644702	-18.0909	3.75798e-73	4.22851e-71	-0.80308	0.513705
221833	ENSG00000164651	SP8	146.364	-0.807784	0.183975	-4.39072	1.12976e-05	3.79306e-05	95.1842	-0.799371	0.19038	-4.19882	2.68308e-05	9.96196e-05	-0.803577	0.00594924
64778	ENSG00000075420	FNDC3B	4471.31	-0.724702	0.0978498	-7.40627	1.29905e-13	1.01699e-12	3602.31	-0.882541	0.0738493	-11.9506	6.44845e-33	2.00931e-31	-0.803622	0.11161
9013	ENSG00000103168	TAF1C	1239.17	-0.874432	0.0946979	-9.23391	2.60934e-20	3.47185e-19	1887.22	-0.733371	0.0817814	-8.96745	3.03455e-19	4.51919e-18	-0.803901	0.0997454
283643	ENSG00000185347	C14orf80	225.884	-1.06516	0.172131	-6.18808	6.09003e-10	3.42706e-09	251.054	-0.553331	0.147861	-3.74223	0.000182392	0.000590942	-0.809246	0.361919
23022	ENSG00000129116	PALLD	2787.23	-0.877083	0.0838138	-10.4647	1.25533e-25	2.31959e-24	1488.14	-0.748701	0.0755718	-9.90714	3.87595e-23	7.37979e-22	-0.812892	0.0907798
5045	ENSG00000140564	FURIN	1997.96	-0.795081	0.0980201	-8.1114	5.00384e-16	4.77482e-15	2349.34	-0.835741	0.0752395	-11.1077	1.15029e-28	2.95375e-27	-0.815411	0.0287512
619567	ENSG00000238942	SNORD2	208.158	-1.01199	0.234889	-4.30837	1.64462e-05	5.39578e-05	103.574	-0.622939	0.206274	-3.01995	0.00252812	0.00655201	-0.817465	0.275101
2040	ENSG00000148175	STOM	4346.93	-0.896718	0.0848518	-10.568	4.19141e-26	7.96895e-25	9257.48	-0.738952	0.0568398	-13.0006	1.21399e-38	4.90532e-37	-0.817835	0.111557
4067	ENSG00000254087	LYN	574.784	-0.817634	0.123838	-6.60247	4.04356e-11	2.52243e-10	946.692	-0.818907	0.0813272	-10.0693	7.553e-24	1.50161e-22	-0.81827	0.00089988
100506190	ENSG00000204054	LINC00963	612.888	-0.520463	0.132056	-3.94122	8.10673e-05	0.000240308	793.571	-1.1163	0.115819	-9.63833	5.50763e-22	9.80661e-21	-0.81838	0.421319
51280	ENSG00000135052	GOLM1	3445.04	-0.958041	0.103664	-9.24175	2.42496e-20	3.23506e-19	8297.77	-0.689753	0.058339	-11.8232	2.96248e-32	9.00582e-31	-0.823897	0.189708
692196		SNORD76	275.656	-1.11393	0.189046	-5.89237	3.8069e-09	1.97194e-08	173.215	-0.536066	0.145055	-3.6956	0.000219365	0.000701614	-0.824996	0.408609
9516	ENSG00000189067	LITAF	10513.9	-1.01311	0.0706189	-14.3462	1.12531e-46	5.10782e-45	4674.52	-0.639349	0.0676496	-9.4509	3.35942e-21	5.60583e-20	-0.826231	0.264291
26115	ENSG00000170921	TANC2	1624.53	-0.734208	0.0969535	-7.57278	3.65314e-14	3.02229e-13	3486.85	-0.921035	0.0737758	-12.4843	9.09925e-36	3.24033e-34	-0.827621	0.132107
7274	ENSG00000137561	TTPA	103.113	-1.06298	0.22262	-4.77485	1.7984e-06	6.73009e-06	136.094	-0.596993	0.170643	-3.4985	0.00046789	0.00140341	-0.829985	0.3295
27112	ENSG00000130054	FAM155B	385.681	-0.943359	0.158273	-5.96032	2.51739e-09	1.32811e-08	393.806	-0.717577	0.109619	-6.54612	5.90513e-11	4.37498e-10	-0.830468	0.159652
153733	ENSG00000164221	CCDC112	543.918	-1.13989	0.110695	-10.2976	7.22642e-25	1.27901e-23	549.015	-0.52748	0.0982084	-5.37102	7.82915e-08	4.17701e-07	-0.833687	0.433043
9962	ENSG00000089057	SLC23A2	7507.4	-0.639466	0.126218	-5.06638	4.05448e-07	1.65407e-06	12826.7	-1.03094	0.064061	-16.093	2.8551e-58	2.2241e-56	-0.835201	0.276811
221458	ENSG00000164627	KIF6	104.828	-0.968978	0.233017	-4.1584	3.20487e-05	0.000100682	87.4436	-0.705943	0.199839	-3.53256	0.000411555	0.00124845	-0.83746	0.185994
2683	ENSG00000086062	B4GALT1	687.517	-0.861423	0.102853	-8.3753	5.50821e-17	5.62925e-16	1493.22	-0.818034	0.069298	-11.8046	3.69668e-32	1.11749e-30	-0.839728	0.0306809
64332	ENSG00000144802	NFKBIZ	2485.22	-1.24227	0.0899721	-13.8072	2.3051e-43	9.46783e-42	4459.34	-0.441682	0.0825927	-5.34771	8.90755e-08	4.71509e-07	-0.841974	0.566099
253639	ENSG00000177842	ZNF620	286.315	-0.708602	0.139573	-5.07693	3.83589e-07	1.57041e-06	108.6	-0.976749	0.187712	-5.20344	1.95638e-07	9.87514e-07	-0.842676	0.189609
841	ENSG00000064012	CASP8	359.698	-1.27147	0.132018	-9.63107	5.91118e-22	8.75956e-21	868.275	-0.415946	0.0864611	-4.81078	1.50339e-06	6.7403e-06	-0.843708	0.604948
79918	ENSG00000103037	SETD6	777.201	-0.705965	0.0997979	-7.07394	1.50593e-12	1.07877e-11	44.5683	-0.982873	0.256788	-3.82757	0.000129417	0.00043147	-0.844419	0.195803
83666	ENSG00000138496	PARP9	663.512	-0.956449	0.120269	-7.95257	1.8268e-15	1.67346e-14	1498.09	-0.743264	0.0771513	-9.63384	5.7536e-22	1.02109e-20	-0.849856	0.150745
2788	ENSG00000176533	GNG7	447.946	-1.10624	0.19315	-5.72737	1.02e-08	5.06148e-08	380.543	-0.596565	0.106535	-5.59972	2.14696e-08	1.22018e-07	-0.851403	0.360396
9351	ENSG00000065054	SLC9A3R2	107.018	-1.06426	0.211697	-5.0273	4.97425e-07	2.00656e-06	205.343	-0.639044	0.144114	-4.43429	9.23776e-06	3.68759e-05	-0.851654	0.300676
7975	ENSG00000198517	MAFK	484.148	-0.782235	0.129947	-6.01966	1.74788e-09	9.39184e-09	713.602	-0.922105	0.100158	-9.20651	3.36902e-20	5.31531e-19	-0.85217	0.0989035
90007	ENSG00000167470	MIDN	1353.78	-1.04107	0.112396	-9.26255	1.99609e-20	2.68664e-19	799.582	-0.677206	0.0836947	-8.09138	5.89929e-16	6.88166e-15	-0.85914	0.257294
7545	ENSG00000152977	ZIC1	667.6	-1.02844	0.125602	-8.18809	2.65408e-16	2.59318e-15	163.411	-0.691234	0.154051	-4.48706	7.22132e-06	2.92664e-05	-0.859839	0.238443
349667	ENSG00000186907	RTN4RL2	48.2785	-1.06592	0.282467	-3.77363	0.000160892	0.000455836	96.3541	-0.659656	0.212738	-3.10079	0.00193002	0.00513162	-0.86279	0.287274
285175	ENSG00000144406	UNC80	78.6773	-1.21805	0.228606	-5.32818	9.9204e-08	4.36145e-07	287.069	-0.511918	0.125425	-4.08146	4.47544e-05	0.000160326	-0.864986	0.499314
55013	ENSG00000005059	CCDC109B	74.9932	-1.04843	0.235701	-4.44812	8.66261e-06	2.95611e-05	42.1633	-0.692147	0.25974	-2.66477	0.00770415	0.0178355	-0.870286	0.251927
166929	ENSG00000164023	SGMS2	252.502	-0.525259	0.173582	-3.026	0.00247815	0.00573075	246.208	-1.21846	0.135532	-8.99021	2.46767e-19	3.69193e-18	-0.871859	0.490168
54734	ENSG00000179331	RAB39A	179.027	-1.32568	0.200349	-6.61686	3.66904e-11	2.29828e-10	169.725	-0.418063	0.160197	-2.60968	0.00906264	0.0205963	-0.871872	0.641783
1843	ENSG00000120129	DUSP1	340.155	-1.1196	0.144752	-7.73456	1.03762e-14	8.96208e-14	284.378	-0.626819	0.145089	-4.32024	1.55858e-05	6.01709e-05	-0.873208	0.348446
23645	ENSG00000087074	PPP1R15A	2289.16	-0.901936	0.140723	-6.40932	1.46174e-10	8.6814e-10	2579.94	-0.858599	0.082749	-10.3759	3.19039e-25	6.88334e-24	-0.880267	0.0306438
221178	ENSG00000182957	SPATA13	1009.13	-1.16561	0.118489	-9.83724	7.78169e-23	1.20884e-21	2087.61	-0.605719	0.0827765	-7.31752	2.52594e-13	2.34947e-12	-0.885663	0.395901
467	ENSG00000162772	ATF3	209.698	-0.797807	0.210663	-3.78712	0.000152404	0.000433363	236.385	-0.97534	0.143912	-6.77735	1.22397e-11	9.75505e-11	-0.886573	0.125535
9144	ENSG00000108639	SYNGR2	429.036	-0.752972	0.123459	-6.09896	1.06762e-09	5.84462e-09	1111.28	-1.0263	0.102298	-10.0325	1.09708e-23	2.15207e-22	-0.889636	0.193272
55619	ENSG00000135905	DOCK10	1530.3	-0.852706	0.101786	-8.37741	5.41045e-17	5.54058e-16	2160.47	-0.928238	0.0833648	-11.1347	8.50696e-29	2.19488e-27	-0.890472	0.0534093
135228	ENSG00000156535	CD109	831.191	-0.404065	0.156342	-2.5845	0.00975212	0.0200385	8127.92	-1.39247	0.0783063	-17.7824	9.6747e-71	1.03131e-68	-0.89827	0.698911
4055	ENSG00000111321	LTBR	2081.59	-0.829096	0.0886389	-9.35363	8.46877e-21	1.18633e-19	3932.38	-0.979453	0.0641989	-15.2565	1.48953e-52	9.89131e-51	-0.904274	0.106319
3491	ENSG00000142871	CYR61	852.84	-0.741667	0.317791	-2.33382	0.0196052	0.0374394	88.0923	-1.07247	0.209022	-5.13091	2.88346e-07	1.42138e-06	-0.907071	0.233916
57522	ENSG00000196935	SRGAP1	1050.14	-1.40366	0.112677	-12.4573	1.2764e-35	3.90543e-34	2564.23	-0.416546	0.0748079	-5.56822	2.57361e-08	1.45044e-07	-0.910101	0.697991
6840	ENSG00000197321	SVIL	169.963	-0.851943	0.165625	-5.14381	2.69225e-07	1.12041e-06	2670.79	-0.968729	0.0750954	-12.9	4.50163e-38	1.77469e-36	-0.910336	0.0825806
26806		SNORD44	219.205	-1.16624	0.227936	-5.11652	3.11228e-07	1.28495e-06	152.206	-0.65897	0.181734	-3.62601	0.000287834	0.000898262	-0.912604	0.358693
9467	ENSG00000131370	SH3BP5	906.869	-0.604538	0.134732	-4.48696	7.22469e-06	2.48915e-05	3969.64	-1.22252	0.0712804	-17.1509	6.19396e-66	5.7349e-64	-0.913528	0.436978
57718	ENSG00000119698	PPP4R4	66.8885	-1.25831	0.257818	-4.8806	1.05764e-06	4.09063e-06	189.086	-0.570539	0.14067	-4.05587	4.9949e-05	0.000177211	-0.914423	0.486325
80176	ENSG00000171621	SPSB1	1395.55	-1.36665	0.102874	-13.2847	2.8403e-40	1.05482e-38	1452.38	-0.462613	0.0824521	-5.61068	2.01528e-08	1.14897e-07	-0.914631	0.63925
442075	ENSG00000180385	EMC3-AS1	330.14	-1.37468	0.141681	-9.70269	2.93666e-22	4.45212e-21	204.78	-0.456257	0.144706	-3.15299	0.00161608	0.00437004	-0.915471	0.649427
57596	ENSG00000183092	BEGAIN	32.3445	-0.968877	0.351178	-2.75893	0.00579901	0.0124754	192.202	-0.863843	0.150789	-5.72883	1.01128e-08	5.98021e-08	-0.91636	0.0742699
607	ENSG00000116128	BCL9	574.313	-1.03765	0.108111	-9.59801	8.15039e-22	1.19605e-20	2441.07	-0.800133	0.0709024	-11.285	1.55652e-29	4.23159e-28	-0.918893	0.167952
375790	ENSG00000188157	AGRN	5220.67	-1.10412	0.101007	-10.9311	8.18217e-28	1.71056e-26	1372.2	-0.735093	0.0939936	-7.82067	5.2544e-15	5.64816e-14	-0.919604	0.260939
23127	ENSG00000198756	COLGALT2	623.425	-0.823139	0.140315	-5.86638	4.45416e-09	2.29307e-08	325.893	-1.02186	0.118215	-8.64407	5.42434e-18	7.31203e-17	-0.922498	0.140515
9770	ENSG00000101265	RASSF2	133.119	-1.15275	0.213645	-5.39566	6.82704e-08	3.06659e-07	382.662	-0.698447	0.116124	-6.01465	1.80279e-09	1.14822e-08	-0.925601	0.321244
23613	ENSG00000101040	ZMYND8	3200.49	-1.11027	0.0866171	-12.8182	1.29726e-37	4.30947e-36	3228.54	-0.74709	0.0682798	-10.9416	7.28991e-28	1.81163e-26	-0.928681	0.256808
4854	ENSG00000074181	NOTCH3	93.4412	-0.89477	0.253728	-3.52649	0.000421115	0.00111337	136.192	-0.965513	0.172032	-5.6124	1.99539e-08	1.13883e-07	-0.930141	0.0500234
4324	ENSG00000102996	MMP15	258.018	-0.438626	0.146089	-3.00245	0.00267815	0.00614921	704.571	-1.42412	0.0950517	-14.9826	9.54098e-51	6.11038e-49	-0.931374	0.696851
3673	ENSG00000164171	ITGA2	340.34	-1.19075	0.180123	-6.61077	3.8232e-11	2.39187e-10	1082.06	-0.67486	0.0861362	-7.8348	4.69603e-15	5.07265e-14	-0.932805	0.364789
5954	ENSG00000049449	RCN1	6153.17	-1.0817	0.085506	-12.6506	1.10988e-36	3.50959e-35	7604	-0.786501	0.0563237	-13.9639	2.58705e-44	1.34784e-42	-0.934103	0.208741
7781	ENSG00000115194	SLC30A3	114.94	-0.953062	0.222358	-4.28616	1.81788e-05	5.92309e-05	60.1758	-0.918782	0.240355	-3.8226	0.000132052	0.00043944	-0.935922	0.0242398
100	ENSG00000196839	ADA	248.684	-0.842999	0.145879	-5.77877	7.525e-09	3.79008e-08	300.32	-1.03196	0.137452	-7.50776	6.01491e-14	5.89235e-13	-0.937479	0.133615
6171	ENSG00000229117	RPL41	609.277	-1.15145	0.124551	-9.24484	2.35587e-20	3.14846e-19	536.883	-0.737817	0.0948299	-7.78043	7.22776e-15	7.66436e-14	-0.944635	0.292484
219539	ENSG00000166793	YPEL4	93.8395	-1.41254	0.280853	-5.02944	4.91914e-07	1.98669e-06	99.285	-0.478511	0.184933	-2.58748	0.00966818	0.0218454	-0.945523	0.660455
8470	ENSG00000154556	SORBS2	236.368	-0.760409	0.193773	-3.92423	8.70082e-05	0.000256711	592.468	-1.13086	0.114732	-9.85651	6.42436e-23	1.21039e-21	-0.945633	0.261946
23301	ENSG00000115504	EHBP1	2476.89	-0.596225	0.0862913	-6.90945	4.86541e-12	3.30075e-11	2791.47	-1.29635	0.0679631	-19.0743	4.13231e-81	5.53354e-79	-0.946285	0.49506
119385	ENSG00000261011	AGAP11	588.793	-1.44094	0.303427	-4.74887	2.04553e-06	7.59847e-06	131.454	-0.452421	0.164636	-2.74801	0.00599588	0.0142325	-0.946679	0.698986
6300	ENSG00000188130	MAPK12	223.932	-1.29442	0.195377	-6.62522	3.46742e-11	2.1774e-10	261.7	-0.605899	0.132069	-4.58774	4.48077e-06	1.86926e-05	-0.950158	0.486856
148534	ENSG00000152078	TMEM56	1541.51	-0.965913	0.120225	-8.03419	9.41981e-16	8.83253e-15	1268.98	-0.938928	0.0765123	-12.2716	1.28693e-34	4.3992e-33	-0.952421	0.0190811
7991	ENSG00000104723	TUSC3	780.074	-1.31898	0.108629	-12.1421	6.31687e-34	1.80832e-32	1410.91	-0.591507	0.0742503	-7.96639	1.63371e-15	1.8319e-14	-0.955246	0.514404
57616	ENSG00000121297	TSHZ3	214.348	-0.906237	0.159695	-5.6748	1.38852e-08	6.79865e-08	396.11	-1.00428	0.11289	-8.89607	5.78571e-19	8.40017e-18	-0.955257	0.0693238
2582	ENSG00000117308	GALE	1309.5	-0.97177	0.100344	-9.68434	3.51457e-22	5.30166e-21	794.206	-0.940176	0.0876662	-10.7245	7.81146e-27	1.86405e-25	-0.955973	0.0223402
55603	ENSG00000112773	FAM46A	989.475	-0.640506	0.0958336	-6.68352	2.33263e-11	1.48829e-10	2047.41	-1.27307	0.0689561	-18.4621	4.17185e-76	5.00715e-74	-0.956789	0.447291
9933	ENSG00000080608	KIAA0020	4057.83	-1.01962	0.123533	-8.25382	1.53409e-16	1.51753e-15	4856.02	-0.895108	0.0615158	-14.5509	5.76606e-48	3.37283e-46	-0.957365	0.0880448
9562	ENSG00000107789	MINPP1	1419.41	-0.745137	0.089477	-8.3277	8.24308e-17	8.32849e-16	1120.49	-1.17022	0.0863707	-13.5488	8.05791e-42	3.80648e-40	-0.957677	0.300576
65124	ENSG00000198142	SOWAHC	459.584	-1.25767	0.132732	-9.47529	2.66012e-21	3.81839e-20	631.163	-0.666829	0.0962204	-6.93022	4.2019e-12	3.48966e-11	-0.96225	0.417789
56704	ENSG00000104369	JPH1	110.278	-1.15076	0.198462	-5.7984	6.69524e-09	3.39137e-08	349.737	-0.774625	0.131736	-5.88012	4.09967e-09	2.52862e-08	-0.962691	0.265967
221749	ENSG00000168994	PXDC1	89.6827	-0.976518	0.21708	-4.49842	6.84604e-06	2.36737e-05	862.079	-0.951469	0.083181	-11.4385	2.68343e-30	7.49648e-29	-0.963994	0.0177123
574040	ENSG00000206760	SNORA6	33.1812	-1.08451	0.36022	-3.01068	0.00260664	0.00599776	37.0802	-0.851136	0.284335	-2.99343	0.00275863	0.00709268	-0.967821	0.165017
2273	ENSG00000022267	FHL1	707.391	-1.45448	0.117928	-12.3336	5.97302e-35	1.77372e-33	720.192	-0.481982	0.0932689	-5.16766	2.37046e-07	1.18253e-06	-0.96823	0.687658
1039	ENSG00000140743	CDR2	1080.18	-1.22495	0.110373	-11.0983	1.27813e-28	2.76775e-27	771.297	-0.713801	0.0904932	-7.8879	3.07322e-15	3.37825e-14	-0.969377	0.36144
50509	ENSG00000080573	COL5A3	34.4518	-1.07306	0.391788	-2.73889	0.00616465	0.0131813	378.93	-0.873156	0.118337	-7.37856	1.60009e-13	1.51479e-12	-0.97311	0.141356
9976	ENSG00000110852	CLEC2B	56.7531	-1.31457	0.266172	-4.93879	7.86069e-07	3.09574e-06	248.304	-0.633627	0.130875	-4.84145	1.28892e-06	5.82225e-06	-0.974099	0.4815
54869	ENSG00000131037	EPS8L1	72.5397	-0.910731	0.257415	-3.53798	0.000403202	0.00107032	71.8197	-1.0426	0.227742	-4.57797	4.69506e-06	1.95262e-05	-0.976664	0.0932444
11322	ENSG00000141524	TNRC6C-AS1	669.045	-1.27508	0.134961	-9.44778	3.46105e-21	4.93991e-20	257.506	-0.680083	0.124792	-5.44974	5.04437e-08	2.74736e-07	-0.977584	0.42073
57181	ENSG00000196950	SLC39A10	2492.01	-1.27964	0.100894	-12.6831	7.33861e-37	2.34015e-35	1698.84	-0.677195	0.0830026	-8.15872	3.38594e-16	4.02512e-15	-0.978418	0.425994
51809	ENSG00000109586	GALNT7	984.026	-1.19396	0.111115	-10.7453	6.23507e-27	1.24004e-25	1410.43	-0.769959	0.0746391	-10.3158	5.98075e-25	1.26509e-23	-0.98196	0.299815
1889	ENSG00000117298	ECE1	5975.35	-1.31317	0.0798946	-16.4362	1.05289e-60	8.42034e-59	2111.17	-0.668737	0.0709351	-9.42746	4.20135e-21	6.96771e-20	-0.990951	0.455679
409	ENSG00000141480	ARRB2	529.495	-1.29618	0.116485	-11.1274	9.22596e-29	2.03577e-27	438.293	-0.689784	0.114606	-6.01875	1.75771e-09	1.12171e-08	-0.992982	0.428787
677825	ENSG00000273544	SNORA44	53.4027	-1.29307	0.281451	-4.59428	4.34248e-06	1.54657e-05	38.7328	-0.692985	0.276448	-2.50674	0.0121849	0.0268251	-0.993026	0.424322
55840	ENSG00000145088	EAF2	86.153	-1.22926	0.237488	-5.17608	2.26595e-07	9.51647e-07	65.9984	-0.757918	0.220857	-3.43171	0.00059978	0.00176023	-0.993588	0.333288
8501	ENSG00000149150	SLC43A1	280.891	-1.56417	0.145151	-10.7762	4.46124e-27	8.91952e-26	171.225	-0.425821	0.148355	-2.87029	0.00410092	0.0101322	-0.994995	0.804933
347	ENSG00000189058	APOD	237.445	-1.48094	0.181089	-8.17797	2.88671e-16	2.80957e-15	1555.54	-0.509417	0.100853	-5.0511	4.39265e-07	2.11891e-06	-0.995178	0.68697
79632	ENSG00000111879	FAM184A	624.77	-1.52137	0.119152	-12.7684	2.46294e-37	8.05787e-36	506.718	-0.470923	0.102601	-4.58986	4.43551e-06	1.85228e-05	-0.996148	0.74278
5028	ENSG00000169860	P2RY1	184.655	-0.867629	0.165461	-5.24372	1.57372e-07	6.74803e-07	132.627	-1.13411	0.169195	-6.70299	2.04192e-11	1.58911e-10	-1.00087	0.188431
5782	ENSG00000127947	PTPN12	7331.08	-1.25179	0.0769196	-16.274	1.51029e-59	1.14714e-57	6436.29	-0.750596	0.0666587	-11.2603	2.06061e-29	5.58329e-28	-1.00119	0.354396
9297		SNORD29	173.517	-1.54777	0.185273	-8.35397	6.60044e-17	6.71823e-16	115.163	-0.455786	0.186088	-2.4493	0.0143134	0.0309517	-1.00178	0.772146
26771	ENSG00000207500	SNORD102	116.744	-1.46162	0.276071	-5.29438	1.19419e-07	5.1958e-07	105.03	-0.542396	0.190026	-2.85433	0.0043128	0.0106072	-1.00201	0.649993
84978	ENSG00000171877	FRMD5	930.848	-1.421	0.104861	-13.5513	7.78904e-42	3.04215e-40	1384.72	-0.58547	0.0748917	-7.81755	5.38593e-15	5.77553e-14	-1.00324	0.590812
3655	ENSG00000091409	ITGA6	2831.35	-0.723757	0.109357	-6.6183	3.63341e-11	2.27691e-10	5170.51	-1.28549	0.0805041	-15.9681	2.13327e-57	1.64597e-55	-1.00463	0.397209
55714	ENSG00000218336	TENM3	1875.23	-0.878306	0.094985	-9.24678	2.31355e-20	3.09737e-19	2914.05	-1.14297	0.0918214	-12.4477	1.43909e-35	5.09118e-34	-1.01064	0.187143
26802		SNORD47	116.496	-1.4547	0.229016	-6.35196	2.12587e-10	1.2469e-09	88.565	-0.567956	0.202643	-2.80274	0.00506703	0.0122448	-1.01133	0.627022
6480	ENSG00000073849	ST6GAL1	1100.29	-1.09755	0.126532	-8.67406	4.16984e-18	4.71364e-17	4145.8	-0.927615	0.0602045	-15.4077	1.45193e-53	9.96845e-52	-1.01258	0.120159
134526	ENSG00000172497	ACOT12	80.2187	-1.54928	0.298149	-5.19633	2.03257e-07	8.58644e-07	122.051	-0.485409	0.198368	-2.44701	0.0144047	0.0311282	-1.01734	0.75227
9796	ENSG00000168490	PHYHIP	35.1654	-0.894067	0.333127	-2.68386	0.0072778	0.015338	39.6367	-1.14241	0.268	-4.26271	2.0196e-05	7.65466e-05	-1.01824	0.175602
57178	ENSG00000108175	ZMIZ1	3499.8	-1.19234	0.0971077	-12.2786	1.18064e-34	3.44506e-33	4012.11	-0.851012	0.0632952	-13.4451	3.28817e-41	1.50079e-39	-1.02168	0.241358
57381	ENSG00000126785	RHOJ	382.666	-1.53275	0.128553	-11.9231	8.97231e-33	2.4131e-31	538.103	-0.518833	0.0981365	-5.28685	1.24443e-07	6.45027e-07	-1.02579	0.716949
91695	ENSG00000182841	RRP7BP	361.273	-1.38066	0.139111	-9.92489	3.24463e-23	5.16238e-22	209.475	-0.673213	0.135956	-4.95168	7.35739e-07	3.44145e-06	-1.02694	0.500244
10507	ENSG00000187764	SEMA4D	86.4736	-1.24897	0.241777	-5.16581	2.39404e-07	1.00377e-06	231.517	-0.805199	0.133105	-6.04935	1.4543e-09	9.36942e-09	-1.02709	0.313796
54676	ENSG00000172432	GTPBP2	3725.71	-1.07219	0.0988894	-10.8423	2.17014e-27	4.42072e-26	3029.39	-0.986419	0.0754165	-13.0796	4.30643e-39	1.79376e-37	-1.0293	0.0606469
284751	ENSG00000203999	LINC01270	275.578	-1.15025	0.154585	-7.4409	9.99987e-14	7.91765e-13	121.92	-0.913257	0.179312	-5.09311	3.52245e-07	1.716e-06	-1.03176	0.167582
65108	ENSG00000175130	MARCKSL1	5333.43	-1.41675	0.0985449	-14.3767	7.25107e-47	3.31118e-45	2989.98	-0.653512	0.0712136	-9.17679	4.44152e-20	6.97345e-19	-1.03513	0.539689
6446	ENSG00000118515	SGK1	12509.1	-1.1881	0.094628	-12.5555	3.70963e-36	1.15849e-34	10460.1	-0.885087	0.0680298	-13.0103	1.06938e-38	4.35354e-37	-1.03659	0.214262
54984	ENSG00000254093	PINX1	564.115	-1.4971	0.115276	-12.9872	1.4471e-38	4.99383e-37	386.978	-0.584358	0.109341	-5.34436	9.07372e-08	4.79522e-07	-1.04073	0.645408
9302	ENSG00000276788	SNORD26	175.564	-1.4619	0.237112	-6.16546	7.02803e-10	3.9194e-09	100.59	-0.623806	0.190397	-3.27635	0.00105157	0.00293616	-1.04285	0.592624
84612	ENSG00000124171	PARD6B	126.853	-1.47246	0.198813	-7.40625	1.29925e-13	1.01699e-12	106.863	-0.630655	0.200563	-3.14442	0.00166415	0.00448656	-1.05156	0.595245
130340	ENSG00000152056	AP1S3	314.447	-1.06443	0.143299	-7.42799	1.10257e-13	8.69797e-13	813.273	-1.04767	0.0904217	-11.5865	4.8252e-31	1.39115e-29	-1.05605	0.0118487
26025	ENSG00000253159	PCDHGA12	37.1442	-1.33421	0.313986	-4.24927	2.14471e-05	6.91496e-05	448.506	-0.779211	0.104463	-7.45919	8.70578e-14	8.38643e-13	-1.05671	0.392444
140462	ENSG00000102048	ASB9	61.5675	-1.41101	0.263942	-5.34593	8.99533e-08	3.98022e-07	515.802	-0.705211	0.110414	-6.38698	1.69194e-10	1.19976e-09	-1.05811	0.499078
341640	ENSG00000150893	FREM2	80.2989	-1.00014	0.257908	-3.87791	0.000105358	0.000307194	931.014	-1.11834	0.103443	-10.8112	3.04679e-27	7.40137e-26	-1.05924	0.0835745
55240	ENSG00000115107	STEAP3	175.152	-1.03577	0.164269	-6.3053	2.87634e-10	1.66574e-09	555.223	-1.08436	0.130709	-8.29596	1.07713e-16	1.33024e-15	-1.06006	0.034359
85414	ENSG00000158715	SLC45A3	221.091	-0.905975	0.152945	-5.92354	3.15093e-09	1.64854e-08	199.374	-1.22039	0.141703	-8.61233	7.15923e-18	9.55528e-17	-1.06318	0.222327
51177	ENSG00000023902	PLEKHO1	720.272	-1.53744	0.119101	-12.9088	4.01565e-38	1.36704e-36	279.261	-0.594748	0.123098	-4.8315	1.35511e-06	6.10763e-06	-1.0661	0.666587
151963	ENSG00000180611	MB21D2	140.344	-1.11024	0.197735	-5.61478	1.96815e-08	9.444e-08	265.484	-1.02738	0.135017	-7.60928	2.75624e-14	2.77043e-13	-1.06881	0.0585888
2180	ENSG00000151726	ACSL1	5661.31	-1.31042	0.0819029	-15.9997	1.28363e-57	9.10897e-56	5906.15	-0.862687	0.0554942	-15.5455	1.70629e-54	1.21259e-52	-1.08655	0.316597
1847	ENSG00000138166	DUSP5	80.5063	-0.96081	0.25644	-3.74673	0.000179158	0.000504277	99.1441	-1.22121	0.202661	-6.02584	1.68229e-09	1.07655e-08	-1.09101	0.184128
7538	ENSG00000128016	ZFP36	240.253	-1.09692	0.1944	-5.64259	1.67514e-08	8.1179e-08	479.321	-1.08802	0.129351	-8.41136	4.0527e-17	5.12214e-16	-1.09247	0.00629477
5414	ENSG00000108387	SEPT4	377.459	-0.836411	0.171507	-4.87685	1.07795e-06	4.16318e-06	3034.47	-1.35279	0.101945	-13.2698	3.46631e-40	1.49772e-38	-1.0946	0.365133
223117	ENSG00000153993	SEMA3D	56.3112	-0.956814	0.267064	-3.58271	0.000340044	0.000915037	114.937	-1.2353	0.207404	-5.95603	2.58442e-09	1.62812e-08	-1.09606	0.196922
2791	ENSG00000127920	GNG11	1571.51	-1.65221	0.137529	-12.0136	3.0157e-33	8.33316e-32	859.633	-0.543527	0.0882069	-6.16195	7.18528e-10	4.78123e-09	-1.09787	0.783961
102723356	ENSG00000251003	ZFPM2-AS1	61.7876	-1.20799	0.269571	-4.48115	7.42405e-06	2.55323e-05	74.2559	-0.99389	0.219117	-4.53589	5.73622e-06	2.3554e-05	-1.10094	0.151391
3008	ENSG00000168298	HIST1H1E	47.3239	-1.54654	0.285371	-5.41939	5.98021e-08	2.70308e-07	49.0834	-0.658059	0.257052	-2.56002	0.0104667	0.0234308	-1.1023	0.628248
30845	ENSG00000013016	EHD3	103.082	-1.08796	0.218287	-4.9841	6.22514e-07	2.47743e-06	136.606	-1.11803	0.173495	-6.44418	1.16229e-10	8.37375e-10	-1.103	0.0212618
9423	ENSG00000065320	NTN1	585.043	-1.11613	0.114908	-9.71326	2.64719e-22	4.02538e-21	432.927	-1.09081	0.113298	-9.62778	6.10339e-22	1.07962e-20	-1.10347	0.0179032
57168	ENSG00000128203	ASPHD2	76.6552	-1.10753	0.244146	-4.53633	5.72426e-06	2.00098e-05	150.652	-1.10201	0.15898	-6.93172	4.15746e-12	3.45453e-11	-1.10477	0.0039039
55630	ENSG00000147804	SLC39A4	125.145	-1.3844	0.196003	-7.06314	1.62787e-12	1.16117e-11	138.341	-0.832855	0.16657	-5.00002	5.73255e-07	2.72069e-06	-1.10863	0.389998
23043	ENSG00000154310	TNIK	1890.14	-0.715528	0.0859489	-8.32503	8.4304e-17	8.51206e-16	1274.59	-1.50309	0.0824556	-18.2291	3.03216e-74	3.4844e-72	-1.10931	0.556892
26230	ENSG00000146426	TIAM2	75.6202	-1.4818	0.234883	-6.30866	2.81457e-10	1.63436e-09	63.3873	-0.740455	0.223374	-3.31487	0.000916854	0.00259571	-1.11113	0.524209
384	ENSG00000081181	ARG2	386.535	-1.4391	0.146306	-9.83627	7.85669e-23	1.21924e-21	156.867	-0.793131	0.156083	-5.08146	3.74537e-07	1.82132e-06	-1.11612	0.456771
26770		SNORD79	72.6491	-1.41313	0.274741	-5.14352	2.69635e-07	1.12181e-06	52.9936	-0.819297	0.249553	-3.28306	0.00102687	0.00287611	-1.11622	0.419906
3910	ENSG00000112769	LAMA4	322.386	-1.21185	0.143589	-8.43975	3.18015e-17	3.31046e-16	3298.33	-1.02378	0.0717369	-14.2714	3.30086e-46	1.83793e-44	-1.11782	0.132986
29109	ENSG00000135723	FHOD1	890.816	-1.30297	0.0990869	-13.1498	1.70619e-39	6.14024e-38	598.894	-0.938034	0.0994761	-9.42974	4.11093e-21	6.82473e-20	-1.1205	0.258051
114818	ENSG00000119771	KLHL29	1537.88	-1.29327	0.0958998	-13.4856	1.89994e-41	7.38243e-40	440.487	-0.951392	0.109927	-8.65477	4.93899e-18	6.66887e-17	-1.12233	0.241745
6080	ENSG00000274266	SNORA73A	132.753	-1.54578	0.20403	-7.57626	3.55646e-14	2.94391e-13	62.4453	-0.701871	0.220678	-3.18053	0.00147007	0.00399925	-1.12383	0.596735
374618	ENSG00000151575	TEX9	225.747	-1.077	0.154315	-6.97926	2.96729e-12	2.05642e-11	166.223	-1.17396	0.157139	-7.47084	7.96855e-14	7.70372e-13	-1.12548	0.0685584
5046	ENSG00000140479	PCSK6	1137.71	-0.794429	0.0995037	-7.98392	1.41761e-15	1.31294e-14	234.664	-1.45764	0.142177	-10.2523	1.1555e-24	2.38503e-23	-1.12604	0.468962
58516	ENSG00000139146	FAM60A	1920.65	-1.20376	0.099761	-12.0665	1.58796e-33	4.44481e-32	1136.2	-1.05582	0.0767044	-13.7648	4.14944e-43	2.05606e-41	-1.12979	0.104611
3092	ENSG00000127946	HIP1	1050.66	-0.84446	0.0995751	-8.48063	2.23973e-17	2.36573e-16	5653.32	-1.41587	0.0823628	-17.1907	3.11751e-66	2.97135e-64	-1.13017	0.404051
692099	ENSG00000244026	FAM86DP	432.596	-1.06573	0.138351	-7.70309	1.32816e-14	1.1387e-13	637.666	-1.20732	0.094619	-12.7598	2.74962e-37	1.03851e-35	-1.13652	0.100118
1827	ENSG00000159200	RCAN1	3794.33	-1.62554	0.111134	-14.6269	1.89231e-48	9.08008e-47	1411.63	-0.649022	0.0798471	-8.1283	4.35339e-16	5.11516e-15	-1.13728	0.690505
1371	ENSG00000080819	CPOX	2901.57	-1.39038	0.0873364	-15.9198	4.61903e-57	3.14489e-55	2173.61	-0.903677	0.0653697	-13.8241	1.82384e-43	9.26383e-42	-1.14703	0.34415
11031	ENSG00000168461	RAB31	2573.33	-1.45242	0.10787	-13.4646	2.5283e-41	9.69932e-40	477.875	-0.845334	0.127594	-6.62518	3.46816e-11	2.63206e-10	-1.14887	0.429272
7071	ENSG00000155090	KLF10	492.355	-1.61953	0.128189	-12.6339	1.37296e-36	4.33242e-35	1360.76	-0.686066	0.0903835	-7.59062	3.18378e-14	3.18045e-13	-1.1528	0.660055
10855	ENSG00000173083	HPSE	40.6579	-1.32708	0.30618	-4.33432	1.46214e-05	4.8391e-05	149.56	-0.980582	0.168719	-5.81191	6.17627e-09	3.74529e-08	-1.15383	0.245013
6546	ENSG00000183023	SLC8A1	1191.34	-1.61208	0.109543	-14.7165	5.0506e-49	2.49477e-47	981.881	-0.709612	0.0886257	-8.00685	1.17688e-15	1.33256e-14	-1.16085	0.638144
26577	ENSG00000163710	PCOLCE2	377.243	-1.42473	0.137698	-10.3468	4.32607e-25	7.78436e-24	494.084	-0.912443	0.104808	-8.70582	3.15285e-18	4.31831e-17	-1.16859	0.362245
729533	ENSG00000196550	FAM72A	106.855	-1.42648	0.206272	-6.91554	4.66069e-12	3.1647e-11	104.984	-0.921654	0.186462	-4.94286	7.6983e-07	3.59055e-06	-1.17407	0.356968
23526	ENSG00000180448	HMHA1	128.377	-1.61459	0.202173	-7.98617	1.39195e-15	1.29076e-14	35.1248	-0.745889	0.283134	-2.6344	0.00842851	0.0192919	-1.18024	0.614261
9021	ENSG00000184557	SOCS3	365.142	-1.41389	0.193587	-7.30367	2.80031e-13	2.13879e-12	1858.16	-0.963683	0.0837726	-11.5036	1.26588e-30	3.60475e-29	-1.18879	0.318347
84451	ENSG00000143674	KIAA1804	90.2279	-1.18189	0.241163	-4.9008	9.54464e-07	3.71344e-06	124.43	-1.19973	0.189919	-6.31705	2.6661e-10	1.85244e-09	-1.19081	0.0126111
1266	ENSG00000117519	CNN3	11004.3	-1.97244	0.0907032	-21.7461	7.52865e-105	1.7507e-102	1693.56	-0.414669	0.0728704	-5.69049	1.26673e-08	7.3875e-08	-1.19355	1.10151
56154	ENSG00000133863	TEX15	294.049	-1.50306	0.148373	-10.1303	4.05425e-24	6.83165e-23	1955.86	-0.884561	0.0949505	-9.31603	1.20779e-20	1.94338e-19	-1.19381	0.437343
9510	ENSG00000154734	ADAMTS1	539.563	-1.35179	0.145064	-9.31855	1.17941e-20	1.62505e-19	1161.88	-1.03896	0.09465	-10.9769	4.93508e-28	1.24166e-26	-1.19538	0.2212
57162	ENSG00000197329	PELI1	1095.57	-1.35054	0.0981527	-13.7596	4.4584e-43	1.80667e-41	405.207	-1.04931	0.111234	-9.43339	3.97062e-21	6.59856e-20	-1.19993	0.213002
4038	ENSG00000134569	LRP4	2018.38	-1.94169	0.112071	-17.3255	3.01901e-67	3.00213e-65	2254.56	-0.466273	0.0764071	-6.10248	1.04432e-09	6.82028e-09	-1.20398	1.04328
344595	ENSG00000243701	LINC00883	971.671	-0.867424	0.156568	-5.54026	3.02031e-08	1.41997e-07	4028.87	-1.54232	0.0814506	-18.9356	5.80409e-80	7.5235e-78	-1.20487	0.477221
25819	ENSG00000151014	NOCT	339.702	-1.05094	0.135499	-7.75602	8.76387e-15	7.61736e-14	264.68	-1.35894	0.128931	-10.54	5.6493e-26	1.28381e-24	-1.20494	0.21779
79366	ENSG00000198157	HMGN5	699.041	-1.68075	0.188771	-8.90367	5.40291e-19	6.55417e-18	607.24	-0.72978	0.0964648	-7.56524	3.87137e-14	3.84126e-13	-1.20527	0.672439
677838	ENSG00000278274	SNORA61	70.3807	-1.76715	0.252632	-6.99495	2.65344e-12	1.84994e-11	49.9905	-0.643511	0.246058	-2.61528	0.00891534	0.0202972	-1.20533	0.794534
157285	ENSG00000275342	SGK223	82.9089	-1.38865	0.225004	-6.17166	6.75768e-10	3.77745e-09	218.302	-1.02334	0.137535	-7.4406	1.00229e-13	9.62088e-13	-1.20599	0.25831
219855	ENSG00000134955	SLC37A2	1305.29	-0.934781	0.0928772	-10.0647	7.91232e-24	1.31278e-22	1422.07	-1.48156	0.0933977	-15.863	1.14376e-56	8.57978e-55	-1.20817	0.386634
23149	ENSG00000130475	FCHO1	137.269	-0.982203	0.259484	-3.78522	0.000153573	0.000436409	41.3462	-1.43958	0.278086	-5.17673	2.25805e-07	1.12993e-06	-1.21089	0.323412
9299	ENSG00000277846	SNORD30	198.292	-1.88343	0.200349	-9.4007	5.41996e-21	7.67066e-20	97.9201	-0.547986	0.191636	-2.85952	0.00424281	0.0104493	-1.21571	0.944299
9908	ENSG00000138757	G3BP2	16840.1	-0.892293	0.0998213	-8.9389	3.93051e-19	4.81049e-18	22768.3	-1.56516	0.0535158	-29.2467	4.93985e-188	4.50153e-185	-1.22873	0.475791
84900	ENSG00000135119	RNFT2	104.713	-1.27954	0.207535	-6.16542	7.02977e-10	3.9194e-09	52.3166	-1.18372	0.250445	-4.72646	2.28463e-06	9.98863e-06	-1.23163	0.0677561
9610	ENSG00000174791	RIN1	208.759	-1.10537	0.16257	-6.79939	1.05066e-11	6.91971e-11	215.288	-1.35992	0.149226	-9.11318	7.9999e-20	1.23215e-18	-1.23265	0.179991
729522	ENSG00000250420	AACSP1	32.1559	-1.5813	0.33241	-4.75708	1.96409e-06	7.30313e-06	42.8224	-0.888349	0.264315	-3.36095	0.000776762	0.00223154	-1.23482	0.48999
51676	ENSG00000100628	ASB2	96.9305	-1.79045	0.258396	-6.9291	4.2353e-12	2.88493e-11	43.51	-0.685559	0.267083	-2.56684	0.010263	0.0230353	-1.238	0.781275
80162	ENSG00000142102	ATHL1	336.184	-2.03719	0.229373	-8.88157	6.59259e-19	7.93367e-18	601.597	-0.44204	0.122198	-3.61741	0.000297567	0.000926315	-1.23962	1.12794
55698	ENSG00000157927	RADIL	33.2	-1.74946	0.365847	-4.78193	1.73617e-06	6.50687e-06	452.144	-0.732445	0.111248	-6.58392	4.58208e-11	3.42609e-10	-1.24095	0.719135
344887	ENSG00000171658	LOC344887	83.4909	-1.64571	0.227708	-7.2273	4.92688e-13	3.69028e-12	120.036	-0.844444	0.205834	-4.10255	4.08613e-05	0.000147095	-1.24508	0.566582
81563	ENSG00000116667	C1orf21	1298.42	-1.88667	0.102237	-18.4539	4.84717e-76	6.31594e-74	1223.21	-0.611763	0.079053	-7.73865	1.00482e-14	1.05243e-13	-1.24922	0.901494
9464	ENSG00000164107	HAND2	61.1833	-0.833635	0.249848	-3.33657	0.000848201	0.00212532	84.1168	-1.68749	0.228145	-7.39654	1.39783e-13	1.33073e-12	-1.26056	0.603763
25927	ENSG00000119865	CNRIP1	71.8364	-1.80779	0.258081	-7.00476	2.47418e-12	1.73055e-11	695.415	-0.734214	0.0911314	-8.05665	7.84126e-16	9.06866e-15	-1.271	0.759135
148756	ENSG00000236719	OVAAL	285.467	-1.15943	0.149936	-7.73287	1.0515e-14	9.07677e-14	234.061	-1.39103	0.13417	-10.3677	3.47825e-25	7.47454e-24	-1.27523	0.163764
590	ENSG00000114200	BCHE	2794.79	-1.41962	0.135695	-10.4619	1.29232e-25	2.38504e-24	1372.59	-1.13587	0.0841894	-13.4919	1.74608e-41	8.08334e-40	-1.27775	0.200643
79007	ENSG00000003249	DBNDD1	996.601	-1.50737	0.130873	-11.5177	1.07387e-30	2.61377e-29	1559.06	-1.04871	0.0913957	-11.4744	1.7748e-30	5.00996e-29	-1.27804	0.32432
26509	ENSG00000138119	MYOF	70.3197	-1.09256	0.330145	-3.30933	0.000935187	0.00232642	746.135	-1.46826	0.212518	-6.90884	4.88624e-12	4.03938e-11	-1.28041	0.265658
9718	ENSG00000145194	ECE2	100.179	-1.10668	0.212175	-5.21589	1.82941e-07	7.76947e-07	74.43	-1.46713	0.217065	-6.75894	1.39002e-11	1.10242e-10	-1.28691	0.254878
257358	ENSG00000235172	LINC01366	147.032	-2.00993	0.239636	-8.38745	4.96805e-17	5.09791e-16	60.5317	-0.568766	0.245308	-2.31858	0.0204181	0.0424977	-1.28935	1.01906
4214	ENSG00000095015	MAP3K1	2031.83	-1.57846	0.105488	-14.9634	1.27434e-50	6.50729e-49	1807.82	-1.02006	0.0788029	-12.9444	2.52663e-38	1.01084e-36	-1.29926	0.39485
6482	ENSG00000008513	ST3GAL1	1153.4	-0.907635	0.145256	-6.24854	4.14309e-10	2.36849e-09	2773.58	-1.70345	0.0732488	-23.2557	1.24555e-119	3.66939e-117	-1.30554	0.562727
352909	ENSG00000167646	DNAAF3	133.17	-1.16042	0.215941	-5.37377	7.71079e-08	3.43599e-07	96.7304	-1.45156	0.192711	-7.5323	4.98545e-14	4.90463e-13	-1.30599	0.205869
10849	ENSG00000117877	CD3EAP	924.422	-1.28157	0.142049	-9.02198	1.84714e-19	2.3189e-18	1248.19	-1.33431	0.0773736	-17.245	1.22039e-66	1.17703e-64	-1.30794	0.0372933
6641	ENSG00000172164	SNTB1	320.976	-1.01326	0.141042	-7.18414	6.76325e-13	5.01602e-12	924.658	-1.62222	0.0957295	-16.9458	2.06547e-64	1.86965e-62	-1.31774	0.430595
56938	ENSG00000029153	ARNTL2	148.511	-1.53072	0.191963	-7.97405	1.53553e-15	1.41781e-14	220.431	-1.10566	0.143919	-7.68254	1.55959e-14	1.60649e-13	-1.31819	0.300562
10984	ENSG00000269821	KCNQ1OT1	838.031	-1.9188	0.289735	-6.6226	3.52939e-11	2.21539e-10	562.158	-0.718207	0.138647	-5.18013	2.21732e-07	1.11092e-06	-1.3185	0.848944
4311	ENSG00000196549	MME	5682.47	-1.70885	0.0884981	-19.3095	4.46876e-83	7.26294e-81	63.4045	-0.94336	0.23068	-4.08947	4.3236e-05	0.000155196	-1.32611	0.541286
8445	ENSG00000127334	DYRK2	1378.07	-0.958985	0.106789	-8.98016	2.70379e-19	3.34161e-18	2001.98	-1.69783	0.0716398	-23.6996	3.64248e-124	1.15724e-121	-1.32841	0.522445
9120	ENSG00000108932	SLC16A6	23439.2	-1.8517	0.148522	-12.4675	1.12228e-35	3.44083e-34	32816.6	-0.82298	0.0664071	-12.393	2.8533e-35	1.00069e-33	-1.33734	0.727418
9891	ENSG00000074590	NUAK1	111.342	-1.24936	0.196619	-6.3542	2.09511e-10	1.22933e-09	66.5756	-1.42693	0.223329	-6.38935	1.66588e-10	1.18335e-09	-1.33814	0.125559
4092	ENSG00000101665	SMAD7	213.142	-1.36885	0.161654	-8.46774	2.50203e-17	2.62262e-16	79.2045	-1.30978	0.223284	-5.86598	4.46484e-09	2.74445e-08	-1.33931	0.0417684
26784	ENSG00000207405	SNORA64	33.8358	-1.46263	0.325097	-4.49906	6.82556e-06	2.36083e-05	38.9959	-1.22588	0.272047	-4.50612	6.60234e-06	2.68721e-05	-1.34425	0.167408
6507	ENSG00000079215	SLC1A3	52.3476	-1.27892	0.310998	-4.1123	3.91737e-05	0.000121633	324.624	-1.41934	0.132656	-10.6994	1.02425e-26	2.43341e-25	-1.34913	0.0992971
152189	ENSG00000170293	CMTM8	57.6043	-1.7374	0.291332	-5.96365	2.46663e-09	1.30224e-08	127.185	-0.980772	0.182735	-5.36719	7.99727e-08	4.26109e-07	-1.35909	0.535019
1051	ENSG00000172216	CEBPB	223.009	-1.18357	0.176858	-6.69224	2.19785e-11	1.40824e-10	296.714	-1.55416	0.257043	-6.04632	1.48193e-09	9.54364e-09	-1.36887	0.262048
9586	ENSG00000146592	CREB5	270.29	-1.26185	0.169697	-7.43587	1.03881e-13	8.21213e-13	533.016	-1.48204	0.104561	-14.1739	1.32862e-45	7.22406e-44	-1.37194	0.155697
64857	ENSG00000090924	PLEKHG2	1633.17	-0.892278	0.101987	-8.7489	2.15441e-18	2.4896e-17	3048.37	-1.85816	0.0744261	-24.9665	1.41452e-137	5.45704e-135	-1.37522	0.68298
9314	ENSG00000136826	KLF4	43.3147	-1.34339	0.296431	-4.53189	5.8459e-06	2.04208e-05	137.233	-1.4086	0.167663	-8.40136	4.41322e-17	5.56911e-16	-1.37599	0.046109
753	ENSG00000168675	LDLRAD4	247.735	-1.1038	0.149045	-7.40584	1.30327e-13	1.01962e-12	261.604	-1.66007	0.137489	-12.0742	1.44575e-33	4.61131e-32	-1.38194	0.393336
26818	ENSG00000199631	SNORD33	56.5075	-2.11353	0.283805	-7.44712	9.54017e-14	7.57749e-13	39.1094	-0.654862	0.288697	-2.26833	0.0233088	0.0475299	-1.38419	1.03143
126326	ENSG00000179855	GIPC3	67.4304	-1.99907	0.272965	-7.32354	2.41513e-13	1.85006e-12	106.467	-0.771494	0.189634	-4.06834	4.73502e-05	0.000168804	-1.38528	0.868029
81796	ENSG00000137571	SLCO5A1	2445.42	-1.33524	0.0832631	-16.0364	7.11466e-58	5.14536e-56	2461.3	-1.44455	0.0764907	-18.8854	1.50518e-79	1.93559e-77	-1.3899	0.0772954
2354	ENSG00000125740	FOSB	111.483	-1.68983	0.257303	-6.56747	5.11764e-11	3.15856e-10	153.972	-1.1137	0.394879	-2.82036	0.00479699	0.0116688	-1.40177	0.407388
7050	ENSG00000177426	TGIF1	749.434	-1.58343	0.112976	-14.0157	1.25015e-44	5.36819e-43	1243.17	-1.22919	0.0797953	-15.4043	1.53238e-53	1.04764e-51	-1.40631	0.250489
80820	ENSG00000122547	EEPD1	84.3774	-1.62331	0.244483	-6.63977	3.1418e-11	1.97868e-10	375.029	-1.20575	0.114161	-10.5618	4.47873e-26	1.03081e-24	-1.41453	0.295257
84441	ENSG00000184384	MAML2	562.815	-1.86386	0.128066	-14.5539	5.51755e-48	2.61435e-46	740.312	-0.983544	0.10146	-9.69395	3.19912e-22	5.7852e-21	-1.4237	0.622481
10402	ENSG00000064225	ST3GAL6	5682.6	-2.29175	0.0829001	-27.6448	3.22593e-168	1.52375e-165	5196.87	-0.591777	0.0802365	-7.37541	1.63842e-13	1.54795e-12	-1.44177	1.20207
5141	ENSG00000065989	PDE4A	68.5239	-2.29962	0.2722	-8.44828	2.95631e-17	3.08809e-16	216.2	-0.584703	0.135493	-4.31538	1.59327e-05	6.13929e-05	-1.44216	1.21263
26792	ENSG00000226572	SNORD57	263.472	-2.48767	0.176022	-14.1327	2.38811e-45	1.05237e-43	102.544	-0.459063	0.189354	-2.42437	0.0153352	0.0329063	-1.47337	1.43444
83876	ENSG00000134042	MRO	53.133	-1.54406	0.286408	-5.39112	7.00195e-08	3.13863e-07	157.224	-1.41388	0.162807	-8.68442	3.80673e-18	5.17454e-17	-1.47897	0.0920488
92659	ENSG00000265688	MAFG-AS1	117.575	-1.96839	0.21077	-9.33902	9.72261e-21	1.3532e-19	121.196	-1.0075	0.188702	-5.3391	9.34101e-08	4.92363e-07	-1.48794	0.67945
10675	ENSG00000114646	CSPG5	118.983	-1.02629	0.193477	-5.30446	1.13006e-07	4.93524e-07	216.617	-1.96663	0.148191	-13.2709	3.41279e-40	1.47854e-38	-1.49646	0.664919
9331	ENSG00000118276	B4GALT6	889.949	-1.19166	0.126909	-9.38983	6.00954e-21	8.48125e-20	2443.23	-1.80868	0.0715241	-25.2877	4.36039e-141	1.76629e-138	-1.50017	0.436304
4938	ENSG00000089127	OAS1	32.6655	-2.51748	0.365994	-6.87848	6.04947e-12	4.0639e-11	81.677	-0.490472	0.197642	-2.48162	0.0130786	0.028548	-1.50398	1.43331
196	ENSG00000106546	AHR	2800.5	-1.50628	0.102161	-14.7441	3.35647e-49	1.66338e-47	4205.68	-1.51261	0.0858216	-17.6251	1.58189e-69	1.63257e-67	-1.50944	0.00447721
2152	ENSG00000117525	F3	59.0895	-1.61823	0.297175	-5.44538	5.16948e-08	2.35281e-07	83.9363	-1.40435	0.212393	-6.61203	3.79088e-11	2.86491e-10	-1.51129	0.151239
80183	ENSG00000102445	KIAA0226L	435.286	-2.49517	0.147132	-16.9587	1.65854e-64	1.49219e-62	385.585	-0.549532	0.112773	-4.87291	1.09968e-06	5.01637e-06	-1.52235	1.37577
1263	ENSG00000173846	PLK3	155.667	-1.96695	0.193253	-10.1781	2.48396e-24	4.24718e-23	89.678	-1.08099	0.208835	-5.17629	2.26342e-07	1.13227e-06	-1.52397	0.626466
55504	ENSG00000127863	TNFRSF19	4151.45	-1.53917	0.0774594	-19.8707	7.29772e-88	1.31316e-85	5451.54	-1.51039	0.158948	-9.50242	2.05066e-21	3.49022e-20	-1.52478	0.0203506
90874	ENSG00000143067	ZNF697	5627.91	-1.7433	0.110041	-15.8423	1.58971e-56	1.05388e-54	3619.6	-1.31447	0.0725934	-18.1073	2.79327e-73	3.16499e-71	-1.52888	0.303228
724102	ENSG00000281398	SNHG4	136.723	-2.18341	0.2201	-9.92009	3.40464e-23	5.3999e-22	232.28	-0.885994	0.138289	-6.40683	1.48575e-10	1.05958e-09	-1.5347	0.917413
56265	ENSG00000088882	CPXM1	5486.93	-2.57248	0.112594	-22.8473	1.55299e-115	4.26789e-113	71.8375	-0.529388	0.216222	-2.44835	0.0143511	0.0310165	-1.55093	1.44469
692088	ENSG00000275072	SNORD50B	34.706	-1.93194	0.358837	-5.3839	7.28903e-08	3.25765e-07	36.5727	-1.17037	0.278179	-4.20727	2.58475e-05	9.61668e-05	-1.55116	0.53851
3400	ENSG00000172201	ID4	172.367	-1.56551	0.203241	-7.70275	1.33164e-14	1.14103e-13	1138.98	-1.55863	0.0984674	-15.8289	1.96652e-56	1.45496e-54	-1.56207	0.00486761
51440	ENSG00000116983	HPCAL4	51.4548	-1.78562	0.368716	-4.8428	1.28021e-06	4.89633e-06	53.9809	-1.35174	0.242463	-5.57504	2.47478e-08	1.39766e-07	-1.56868	0.306796
63027	ENSG00000137266	SLC22A23	2102.86	-2.3685	0.122207	-19.3811	1.11492e-83	1.85187e-81	1079.59	-0.772717	0.089134	-8.66916	4.3533e-18	5.89771e-17	-1.57061	1.12839
4929	ENSG00000153234	NR4A2	539.094	-1.74397	0.164867	-10.578	3.76999e-26	7.19487e-25	938.528	-1.39735	0.0940175	-14.8627	5.75579e-50	3.64301e-48	-1.57066	0.245091
1299	ENSG00000092758	COL9A3	213.984	-2.66135	0.204289	-13.0274	8.55032e-39	2.97099e-37	520.968	-0.507826	0.101697	-4.99353	5.92844e-07	2.80791e-06	-1.58459	1.52277
631	ENSG00000125864	BFSP1	35.4684	-1.93322	0.352205	-5.48892	4.04391e-08	1.87037e-07	128.289	-1.24174	0.196486	-6.31971	2.62061e-10	1.82217e-09	-1.58748	0.488956
692086	ENSG00000212232	SNORD17	206.838	-2.39098	0.168485	-14.1911	1.04048e-45	4.6392e-44	321.799	-0.791074	0.127803	-6.18978	6.0248e-10	4.03554e-09	-1.59103	1.1313
214	ENSG00000170017	ALCAM	35.6073	-2.64264	0.362531	-7.28943	3.11276e-13	2.37025e-12	1472.99	-0.548737	0.078932	-6.95202	3.60094e-12	3.00753e-11	-1.59569	1.48061
1745	ENSG00000144355	DLX1	349.415	-1.37408	0.153034	-8.97895	2.73362e-19	3.37571e-18	637.212	-1.84516	0.107363	-17.1861	3.3746e-66	3.19758e-64	-1.60962	0.333101
3672	ENSG00000213949	ITGA1	120.673	-1.83813	0.203564	-9.02976	1.72054e-19	2.17078e-18	684.956	-1.38128	0.102967	-13.4147	4.9572e-41	2.24362e-39	-1.6097	0.323045
51330	ENSG00000006327	TNFRSF12A	67.498	-1.28527	0.252741	-5.08535	3.66942e-07	1.50388e-06	162.909	-1.98325	0.192448	-10.3054	6.66452e-25	1.40606e-23	-1.63426	0.493541
54910	ENSG00000168758	SEMA4C	4205.55	-2.15724	0.0868021	-24.8524	2.43746e-136	8.37324e-134	1254.31	-1.11646	0.088046	-12.6804	7.59084e-37	2.83397e-35	-1.63685	0.73594
4983	ENSG00000079482	OPHN1	1058.93	-2.29073	0.120097	-19.0739	4.16036e-81	6.22612e-79	4145.68	-0.990276	0.080051	-12.3706	3.77155e-35	1.3142e-33	-1.6405	0.919558
645687	ENSG00000258791	LINC00520	3716.51	-2.2589	0.11116	-20.3212	8.35024e-92	1.57767e-89	292.139	-1.02332	0.118902	-8.60646	7.53512e-18	1.00487e-16	-1.64111	0.873688
1960	ENSG00000179388	EGR3	72.3834	-2.66048	0.355914	-7.47505	7.71742e-14	6.20143e-13	128.93	-0.627722	0.201021	-3.12267	0.00179221	0.00479668	-1.6441	1.43738
83641	ENSG00000065809	FAM107B	1009.16	-2.04164	0.100982	-20.2178	6.82192e-91	1.25748e-88	530.92	-1.28392	0.101371	-12.6656	9.17232e-37	3.40089e-35	-1.66278	0.53579
2264	ENSG00000160867	FGFR4	118.586	-1.68119	0.229344	-7.33043	2.29421e-13	1.76293e-12	242.489	-1.68619	0.138362	-12.1868	3.65476e-34	1.22099e-32	-1.68369	0.00353767
54855	ENSG00000183508	FAM46C	65.6385	-1.39871	0.284719	-4.9126	8.98745e-07	3.51567e-06	94.937	-1.98017	0.213266	-9.28494	1.61796e-20	2.59049e-19	-1.68944	0.411151
8612	ENSG00000141934	PPAP2C	343.9	-1.63063	0.172599	-9.4475	3.47011e-21	4.94817e-20	170.498	-1.76443	0.161572	-10.9204	9.20709e-28	2.27066e-26	-1.69753	0.094615
64855	ENSG00000136830	FAM129B	1648.73	-1.98357	0.0907132	-21.8664	5.42381e-106	1.32227e-103	2461.34	-1.44706	0.0737891	-19.6107	1.25175e-85	1.82721e-83	-1.71532	0.379374
80139	ENSG00000183779	ZNF703	2055.72	-2.09029	0.109156	-19.1496	9.75916e-82	1.4751e-79	3265.88	-1.37413	0.0823495	-16.6865	1.64196e-62	1.45381e-60	-1.73221	0.506399
121268	ENSG00000167550	RHEBL1	39.6145	-2.70987	0.350084	-7.74064	9.8915e-15	8.563e-14	62.8322	-0.768609	0.233448	-3.29242	0.0009933	0.00279071	-1.73924	1.37268
84034	ENSG00000132205	EMILIN2	629.138	-1.36195	0.123646	-11.0149	3.23988e-28	6.92656e-27	79.7004	-2.12004	0.232006	-9.13788	6.36862e-20	9.87471e-19	-1.74099	0.536052
54491	ENSG00000145569	FAM105A	32.219	-2.42571	0.387866	-6.25398	4.00111e-10	2.29252e-09	74.0847	-1.06598	0.212951	-5.00575	5.5646e-07	2.64641e-06	-1.74584	0.961475
5271	ENSG00000166401	SERPINB8	97.3244	-0.822777	0.262156	-3.1385	0.00169816	0.00404725	263.429	-2.70606	0.15006	-18.0332	1.06871e-72	1.19423e-70	-1.76442	1.33168
116238	ENSG00000160606	TLCD1	119.602	-1.86305	0.205922	-9.04734	1.46492e-19	1.85913e-18	138.061	-1.66678	0.193508	-8.61348	7.08778e-18	9.4677e-17	-1.76491	0.138784
3383	ENSG00000090339	ICAM1	1939.37	-1.99926	0.100794	-19.8351	1.48298e-87	2.63708e-85	1365.72	-1.58193	0.079432	-19.9155	2.98452e-88	4.60555e-86	-1.7906	0.2951
27115	ENSG00000171408	PDE7B	167.264	-2.42379	0.195757	-12.3816	3.28664e-35	9.81769e-34	150.007	-1.18232	0.191239	-6.18242	6.31278e-10	4.21798e-09	-1.80305	0.877852
687	ENSG00000119138	KLF9	906.566	-1.33739	0.12377	-10.8054	3.2443e-27	6.55582e-26	2663.8	-2.27254	0.0816817	-27.822	2.35341e-170	1.41231e-167	-1.80497	0.661256
154664	ENSG00000179869	ABCA13	289.834	-1.6086	0.168027	-9.57346	1.03386e-21	1.5113e-20	219.427	-2.01821	0.154463	-13.066	5.14751e-39	2.13312e-37	-1.81341	0.289642
400745	ENSG00000189410	SH2D5	36.9205	-1.85046	0.348279	-5.31315	1.07746e-07	4.72191e-07	61.965	-1.81715	0.240351	-7.56041	4.01812e-14	3.98199e-13	-1.83381	0.0235536
1306	ENSG00000204291	COL15A1	36.4414	-1.31886	0.329896	-3.99781	6.39315e-05	0.000192342	123.56	-2.36575	0.20753	-11.3996	4.20174e-30	1.16179e-28	-1.84231	0.740263
2690	ENSG00000112964	GHR	1468.2	-2.1334	0.112015	-19.0456	7.14155e-81	1.0498e-78	4648.3	-1.58815	0.0976895	-16.2571	1.98911e-59	1.61147e-57	-1.86078	0.385554
5327	ENSG00000104368	PLAT	1175.58	-1.76401	0.10141	-17.3948	9.0311e-68	9.22331e-66	2544.36	-1.9636	0.070306	-27.9294	1.17245e-171	7.3066e-169	-1.86381	0.141138
7128	ENSG00000118503	TNFAIP3	6125.51	-3.09527	0.103166	-30.0029	8.98964e-198	6.17629e-195	6680.36	-0.659032	0.0695499	-9.47566	2.65069e-21	4.4553e-20	-1.87715	1.72268
4616	ENSG00000099860	GADD45B	197.441	-2.90744	0.245459	-11.8449	2.28642e-32	5.96879e-31	57.7394	-0.852344	0.236869	-3.59837	0.000320215	0.000990917	-1.87989	1.45317
54898	ENSG00000197977	ELOVL2	44.2383	-1.61242	0.314862	-5.12103	3.03871e-07	1.25698e-06	2719.04	-2.18633	0.0878417	-24.8894	9.68679e-137	3.56716e-134	-1.89937	0.405815
100506697	ENSG00000232977	LINC00327	48.6166	-3.00707	0.327238	-9.18923	3.95678e-20	5.19156e-19	126.753	-0.828533	0.174178	-4.75681	1.96675e-06	8.68083e-06	-1.9178	1.54045
23089	ENSG00000242265	PEG10	9825.46	-2.56522	0.12148	-21.1164	5.62244e-99	1.23164e-96	10412.3	-1.27452	0.0741909	-17.179	3.81535e-66	3.59419e-64	-1.91987	0.912661
10125	ENSG00000172575	RASGRP1	104.724	-2.88038	0.24157	-11.9236	8.9187e-33	2.40296e-31	195.055	-0.972016	0.146256	-6.64598	3.01208e-11	2.29994e-10	-1.9262	1.34942
9592	ENSG00000160888	IER2	709.536	-2.77182	0.170806	-16.2279	3.20313e-59	2.3968e-57	624.55	-1.108	0.214541	-5.16449	2.411e-07	1.1998e-06	-1.93991	1.1765
1310	ENSG00000082293	COL19A1	1735.99	-2.24817	0.271654	-8.27586	1.27535e-16	1.27493e-15	5576.35	-1.70041	0.0616042	-27.6022	1.04592e-167	6.05252e-165	-1.97429	0.387321
2533	ENSG00000082074	FYB	175.098	-3.20314	0.251117	-12.7555	2.90322e-37	9.47627e-36	1262.39	-0.749556	0.0916791	-8.17587	2.93741e-16	3.52816e-15	-1.97635	1.73494
149111	ENSG00000143786	CNIH3	34.2025	-2.03	0.356072	-5.70109	1.19044e-08	5.86871e-08	35.7282	-1.99774	0.296417	-6.73962	1.58805e-11	1.25212e-10	-2.01387	0.0228121
23670	ENSG00000135048	TMEM2	5336.07	-1.99709	0.122727	-16.2726	1.54484e-59	1.16751e-57	8184.62	-2.07291	0.0720603	-28.7663	5.66004e-182	4.36713e-179	-2.035	0.0536141
3570	ENSG00000160712	IL6R	4575.94	-3.44637	0.108373	-31.801	6.27756e-222	5.2714e-219	4136.62	-0.633316	0.0747567	-8.4717	2.41835e-17	3.11731e-16	-2.03984	1.98913
6285	ENSG00000160307	S100B	285.935	-3.01846	0.179311	-16.8337	1.38294e-63	1.20133e-61	2839.54	-1.22283	0.0776978	-15.7383	8.25909e-56	6.02802e-54	-2.12065	1.2697
3936	ENSG00000136167	LCP1	246.81	-3.33298	0.223803	-14.8924	3.69075e-50	1.872e-48	73.7781	-0.912652	0.209119	-4.36428	1.27545e-05	5.00511e-05	-2.12282	1.71143
10752	ENSG00000134121	CHL1	2994.73	-2.38121	0.113604	-20.9607	1.50017e-97	3.19367e-95	2600.11	-1.94469	0.0801611	-24.2598	5.21128e-130	1.75164e-127	-2.16295	0.308663
10673	ENSG00000102524	TNFSF13B	135.033	-3.28478	0.227257	-14.454	2.3638e-47	1.09263e-45	34.7282	-1.04918	0.284335	-3.68993	0.000224312	0.000715599	-2.16698	1.58081
1746	ENSG00000115844	DLX2	72.1761	-1.69719	0.275459	-6.16133	7.21359e-10	4.01744e-09	311.09	-2.67197	0.13942	-19.1649	7.27647e-82	1.01638e-79	-2.18458	0.689271
30812	ENSG00000005513	SOX8	171.67	-1.99325	0.223749	-8.9084	5.17761e-19	6.296e-18	218.831	-2.38161	0.154997	-15.3655	2.78951e-53	1.89115e-51	-2.18743	0.274613
634	ENSG00000079385	CEACAM1	6286.32	-2.30604	0.127203	-18.1287	1.89015e-73	2.26743e-71	4631.62	-2.07963	0.0657659	-31.6217	1.85869e-219	2.31664e-216	-2.19283	0.160096
5228	ENSG00000119630	PGF	41.3842	-1.76092	0.355687	-4.95075	7.39298e-07	2.91838e-06	353.151	-2.6291	0.130196	-20.1935	1.11745e-90	1.90589e-88	-2.19501	0.613901
649446	ENSG00000177337	DLGAP1-AS1	102.584	-3.38003	0.254367	-13.288	2.71711e-40	1.01155e-38	169.959	-1.03823	0.180268	-5.75939	8.44171e-09	5.03983e-08	-2.20913	1.6559
3397	ENSG00000125968	ID1	47.9706	-2.93047	0.341791	-8.57388	1.00055e-17	1.09431e-16	203.854	-1.49692	0.175165	-8.54581	1.27641e-17	1.67735e-16	-2.2137	1.01367
5003	ENSG00000254827	SLC22A18AS	32.5569	-2.46523	0.359576	-6.85592	7.08545e-12	4.73879e-11	41.5854	-2.0032	0.284485	-7.04148	1.90204e-12	1.62632e-11	-2.23421	0.326706
6527	ENSG00000100191	SLC5A4	336.859	-3.15087	0.192397	-16.3769	2.79604e-60	2.20115e-58	3126.17	-1.38729	0.0987532	-14.0481	7.91728e-45	4.21986e-43	-2.26908	1.24704
55970	ENSG00000172380	GNG12	11430.2	-2.84127	0.0968673	-29.3316	4.1058e-189	2.2164e-186	11720.1	-1.76549	0.0606906	-29.09	4.80624e-186	4.09871e-183	-2.30338	0.760691
2353	ENSG00000170345	FOS	1489.37	-4.10856	0.149076	-27.5601	3.34641e-167	1.48768e-164	2459.31	-0.505397	0.104014	-4.85892	1.1803e-06	5.36373e-06	-2.30698	2.54782
1958	ENSG00000120738	EGR1	3077.48	-3.72414	0.48848	-7.62395	2.46032e-14	2.06141e-13	5592.78	-0.963743	0.210636	-4.57539	4.75334e-06	1.97534e-05	-2.34394	1.9519
51339	ENSG00000165617	DACT1	89.7391	-4.0728	0.319992	-12.7278	4.14135e-37	1.3404e-35	500.787	-0.620504	0.107244	-5.78593	7.21128e-09	4.33399e-08	-2.34665	2.44114
5789	ENSG00000153707	PTPRD	166.224	-3.16959	0.210217	-15.0777	2.26974e-51	1.19955e-49	529.439	-1.65517	0.115041	-14.3876	6.18922e-47	3.53112e-45	-2.41238	1.07086
1959	ENSG00000122877	EGR2	220.274	-3.61208	0.230673	-15.6589	2.88812e-55	1.80388e-53	34.4911	-1.24269	0.292253	-4.25211	2.11767e-05	7.99082e-05	-2.42739	1.67541
375387	ENSG00000174004	NRROS	185.16	-2.5444	0.191093	-13.315	1.89365e-40	7.08479e-39	230.813	-2.31877	0.156595	-14.8074	1.31196e-49	8.17601e-48	-2.43159	0.159543
56776	ENSG00000155816	FMN2	2260.94	-3.78629	0.0954589	-39.6641	0	0	659.131	-1.10178	0.098461	-11.19	4.56279e-29	1.19436e-27	-2.44404	1.89823
283463	ENSG00000205592	MUC19	138.067	-3.84133	0.27447	-13.9955	1.66141e-44	7.11396e-43	4465.73	-1.10613	0.203767	-5.42843	5.68532e-08	3.08194e-07	-2.47373	1.93408
4133	ENSG00000078018	MAP2	652.635	-3.1534	0.131075	-24.058	6.8903e-128	2.08294e-125	237.717	-1.8652	0.139934	-13.3292	1.56606e-40	6.91412e-39	-2.5093	0.910894
644242	ENSG00000260941	LINC00622	248.025	-2.86299	0.238237	-12.0174	2.8792e-33	7.98517e-32	198.097	-2.17035	0.178254	-12.1756	4.19336e-34	1.39231e-32	-2.51667	0.489771
23462	ENSG00000164683	HEY1	2385.66	-3.16893	0.0991668	-31.9555	4.53016e-224	4.02784e-221	1119.52	-1.87391	0.0868561	-21.5749	3.09288e-103	6.96027e-101	-2.52142	0.915715
5803	ENSG00000106278	PTPRZ1	968.369	-2.7742	0.12642	-21.9442	9.83067e-107	2.47651e-104	1380.49	-2.27398	0.0844233	-26.9354	8.4546e-160	4.15121e-157	-2.52409	0.353709
389792	ENSG00000188483	IER5L	371.903	-2.73338	0.215257	-12.6982	6.04918e-37	1.93715e-35	382.999	-2.38599	0.13782	-17.3123	3.79707e-67	3.70626e-65	-2.55968	0.245645
81575	ENSG00000178878	APOLD1	10878.1	-1.82917	0.107334	-17.0419	4.01747e-65	3.65808e-63	1940.07	-3.33223	0.0815661	-40.8532	0	0	-2.5807	1.06282
23091	ENSG00000123200	ZC3H13	28925.6	-3.32288	0.135304	-24.5585	3.50562e-133	1.12739e-130	18527.4	-1.88497	0.0698153	-26.9994	1.50023e-160	7.59634e-158	-2.60393	1.01675
1902	ENSG00000198121	LPAR1	164.841	-3.37832	0.222348	-15.1938	3.88423e-52	2.12718e-50	90.6357	-2.06226	0.239867	-8.59752	8.14588e-18	1.08542e-16	-2.72029	0.930591
1543	ENSG00000140465	CYP1A1	213.619	-2.28594	0.185486	-12.3241	6.72302e-35	1.99252e-33	232.662	-3.17015	0.176445	-17.9668	3.5462e-72	3.85631e-70	-2.72805	0.625232
6489	ENSG00000111728	ST8SIA1	421.319	-3.38274	0.182515	-18.534	1.09791e-76	1.4557e-74	596.28	-2.15234	0.102976	-20.9013	5.20991e-97	1.02947e-94	-2.76754	0.870024
5210	ENSG00000114268	PFKFB4	553.312	-2.75953	0.126842	-21.7556	6.10875e-105	1.44271e-102	690.198	-2.93218	0.117712	-24.9098	5.83348e-137	2.19813e-134	-2.84586	0.122085
85439	ENSG00000140022	STON2	285.102	-3.22987	0.174294	-18.5311	1.1579e-76	1.52188e-74	385.103	-2.63118	0.137897	-19.0807	3.65143e-81	4.93035e-79	-2.93052	0.423344
401647	ENSG00000155265	GOLGA7B	902.111	-3.39904	0.123174	-27.5955	1.25961e-167	5.76938e-165	1226.15	-2.75672	0.0892213	-30.8975	1.28945e-209	1.30581e-206	-3.07788	0.45419
2173	ENSG00000164434	FABP7	729.589	-3.96589	0.151547	-26.1694	5.92975e-151	2.42238e-148	2454.23	-2.19351	0.0934107	-23.4824	6.1681e-122	1.88569e-119	-3.0797	1.25326
3280	ENSG00000114315	HES1	766.883	-3.80839	0.166419	-22.8843	6.65579e-116	1.863e-113	728.613	-2.35657	0.10813	-21.7938	2.65613e-105	6.32901e-103	-3.08248	1.02659
11069	ENSG00000091428	RAPGEF4	95.854	-3.70728	0.287183	-12.9091	3.9985e-38	1.36427e-36	120.317	-2.64984	0.201367	-13.1593	1.50544e-39	6.35224e-38	-3.17856	0.747722
6017	ENSG00000140522	RLBP1	71.8672	-4.66573	0.367265	-12.704	5.62109e-37	1.80772e-35	509.387	-1.81931	0.127021	-14.3229	1.57413e-46	8.79506e-45	-3.24252	2.01272
80760	ENSG00000123243	ITIH5	49.9878	-3.52532	0.354318	-9.94961	2.53174e-23	4.05373e-22	1206.64	-3.00337	0.103507	-29.0161	4.12276e-185	3.34005e-182	-3.26434	0.369078
84767	ENSG00000124900	TRIM51	42.2419	-4.82466	0.453888	-10.6296	2.16984e-26	4.19938e-25	121.017	-1.75005	0.18573	-9.42254	4.40306e-21	7.27245e-20	-3.28735	2.17408
6615	ENSG00000124216	SNAI1	251.259	-4.6136	0.221778	-20.8028	4.08226e-96	8.22711e-94	57.5665	-2.03002	0.268013	-7.57436	3.60896e-14	3.58969e-13	-3.32181	1.82686
23764	ENSG00000185022	MAFF	1784.78	-4.27708	0.14537	-29.422	2.87296e-190	1.67018e-187	2128.93	-2.86405	0.099871	-28.6774	7.29522e-181	5.37293e-178	-3.57056	0.999167
9518	ENSG00000130513	GDF15	5514.25	-5.1362	0.282046	-18.2105	4.25775e-74	5.18999e-72	7442.36	-2.51429	0.177036	-14.2021	8.8853e-46	4.9136e-44	-3.82525	1.85397
157638	ENSG00000168672	FAM84B	1880.79	-4.6049	0.127731	-36.0515	1.30646e-284	1.97472e-281	1297.9	-3.22539	0.0895078	-36.0347	2.39278e-284	6.4617e-281	-3.91515	0.975466
3346	ENSG00000126550	HTN1	2041.37	-5.55252	0.425385	-13.053	6.11324e-39	2.14389e-37	839.419	-2.30517	0.212864	-10.8293	2.50014e-27	6.0917e-26	-3.92885	2.29622
10253	ENSG00000136158	SPRY2	635.621	-4.80507	0.187638	-25.6082	1.2351e-144	4.91277e-142	3573.85	-3.06035	0.0910465	-33.613	1.08336e-247	1.9504e-244	-3.93271	1.2337
1848	ENSG00000139318	DUSP6	1969.09	-6.18228	0.362489	-17.0551	3.2046e-65	2.93561e-63	3619.86	-2.38847	0.197513	-12.0927	1.15397e-33	3.7321e-32	-4.28537	2.68262
100509894	ENSG00000235903	CPB2-AS1	244.893	-5.33652	0.290044	-18.399	1.33823e-75	1.72883e-73	132.963	-3.23546	0.209001	-15.4806	4.68874e-54	3.27464e-52	-4.28599	1.48567
90226	ENSG00000145040	UCN2	343.856	-4.79864	0.222517	-21.5653	3.80694e-103	8.71848e-101	324.467	-4.1153	0.174764	-23.5478	1.32335e-122	4.12352e-120	-4.45697	0.483197
