# Supplementary material for: A Network of MicroRNAs and mRNAs Involved in Melanosome Maturation and Trafficking Defines the Lower Response of Pigmentable Melanoma Cells to Targeted Therapy
Source: Cancers (Basel). 2023 Jan 31;15(3):894. doi: 10.3390/cancers15030894 (PMC9913661; doi:10.3390/cancers15030894)
Supplement: Supplementary file 1 [file cancers-15-00894-s001.zip › Supplementary Table S7-List of the 1430 enriched BPs according to clusterProfiler.xlsx]

## Sheet: Foglio1
Cluster	ID	Description	GeneRatio	BgRatio	pvalue	p.adjust	qvalue	geneID	Count
SK-Mel-5	GO:0042254	ribosome biogenesis	123/3566	299/18723	5.43727e-19	3.3972e-15	2.69517e-15	6041/2752/9775/131870/260294/155400/10521/90441/23016/51504/6128/84128/6230/6130/29889/51202/10557/81875/6193/55272/2068/8451/65008/6125/6059/6147/3921/57647/51096/83732/6152/92345/29081/11157/55011/6155/54552/9875/79707/4809/4869/5901/23212/27341/6201/6218/6208/51018/55127/84154/134430/6129/54663/9045/10200/54606/55720/84946/11224/285367/6165/81887/5393/8886/23160/51121/65083/92856/708/51106/111…	123
SK-Mel-5	GO:0006364	rRNA processing	98/3566	225/18723	2.17701e-17	6.80097e-14	5.39554e-14	6041/9775/131870/260294/155400/10521/23016/51504/84128/6230/6130/51202/10557/55272/2068/65008/6125/57647/51096/83732/92345/29081/11157/55011/6155/9875/79707/4809/23212/27341/6201/6218/6208/51018/55127/84154/134430/6129/54663/9045/10200/54606/55720/11224/285367/6165/81887/5393/8886/23160/65083/92856/51106/11103/285855/10248/84365/4839/26156/5822/79039/23404/84549/23481/50628/56342/2091/91695/9277/…	98
SK-Mel-5	GO:0016072	rRNA metabolic process	100/3566	236/18723	1.00153e-16	2.08585e-13	1.6548e-13	4137/6041/9775/131870/260294/155400/10521/23016/51504/84128/6230/6130/51202/10557/55272/2068/65008/6125/57647/51096/83732/92345/29081/11157/55011/6155/9875/79707/4809/23212/27341/6201/6218/6208/51018/55127/84154/134430/6129/54663/9045/10200/54606/53918/55720/11224/285367/6165/81887/5393/8886/23160/65083/92856/51106/11103/285855/10248/84365/4839/26156/5822/79039/23404/84549/23481/50628/56342/2091/…	100
SK-Mel-5	GO:0022613	ribonucleoprotein complex biogenesis	155/3566	463/18723	6.4909e-14	1.01388e-10	8.04359e-11	10659/6041/2752/9775/8996/192670/54960/10181/131870/260294/155400/6733/10521/6636/90441/23016/51504/6128/84128/6230/6130/29889/10978/51202/10557/8668/81875/6193/10480/55272/8666/2068/8451/27339/65008/6125/3320/6059/11218/6147/8664/3921/57647/3646/51096/83732/6152/92345/8894/27161/29081/11157/55011/6155/54552/9875/79707/4809/4869/5901/23212/27341/6201/6218/6208/51018/55127/84154/134430/6129/54663/…	155
SK-Mel-5	GO:0061564	axon development	153/3566	467/18723	6.77371e-13	8.46443e-10	6.71524e-10	6387/57556/9315/348/5354/10512/27255/4137/6092/6696/659/10154/23105/3913/26053/2896/10090/9638/4685/6812/65078/393/1954/5364/23077/66008/3909/6792/2263/5361/80031/10013/5764/5802/3717/1949/5797/288/22906/8482/3911/2064/22902/85440/80208/2737/10439/9860/5365/23334/3897/91137/1267/79600/10494/706/2281/2044/5864/2297/3800/3908/65059/10939/6477/2258/9024/1855/1495/55740/3320/3688/4038/5062/6152/20093…	153
SK-Mel-5	GO:0042273	ribosomal large subunit biogenesis	40/3566	72/18723	5.58348e-12	5.81427e-09	4.61274e-09	90441/6128/6130/65008/6125/6147/6152/9875/79707/4809/4869/23212/51018/84154/6129/54663/9045/11224/6165/81887/8886/51121/285855/84365/4839/26156/84549/23481/51187/56342/51388/26155/10969/23560/55651/51491/54475/55299/51154/23246	40
SK-Mel-5	GO:0007409	axonogenesis	133/3566	418/18723	2.03555e-10	1.81688e-07	1.44142e-07	6387/57556/348/10512/27255/4137/6092/6696/659/10154/23105/3913/26053/10090/9638/6812/65078/393/1954/5364/23077/66008/3909/6792/2263/5361/80031/10013/5802/1949/5797/288/22906/8482/3911/2064/22902/85440/80208/2737/10439/5365/23334/3897/1267/79600/10494/2044/5864/2297/3800/3908/65059/10939/6477/2258/9024/1855/55740/3320/3688/4038/5062/6152/200933/1123/107/5362/214/596/10678/91624/1605/575/2131/2045/…	133
SK-Mel-5	GO:0034470	ncRNA processing	127/3566	395/18723	2.46491e-10	1.9251e-07	1.52727e-07	6041/9775/192670/55152/131870/260294/155400/150962/10521/285381/55621/23016/51504/84128/6230/6130/10978/51202/10557/5073/24140/79828/55272/2068/65008/6125/51605/57647/51096/83732/92345/27161/29081/11157/55011/6155/348180/9875/54888/79707/54920/4809/115708/23212/27341/6201/6218/6208/51018/55127/3181/84154/134430/6129/54663/9045/10200/54606/339175/51002/55720/11224/6741/285367/6165/81887/5393/8886/…	127
SK-Mel-5	GO:0000470	maturation of LSU-rRNA	20/3566	28/18723	2.39445e-09	1.66228e-06	1.31877e-06	6130/65008/9875/79707/4809/51018/84154/6129/11224/81887/8886/285855/84365/4839/26156/84549/23481/23560/55651/23246	20
SK-Mel-5	GO:0048732	gland development	132/3566	436/18723	8.07398e-09	5.04463e-06	4.00215e-06	5176/23213/538/10512/3398/55959/999/7042/9935/2113/2099/4233/3157/6662/7067/137964/50/3155/5909/5896/2263/10116/34/5361/8660/5764/7299/3717/5629/3321/3213/1628/8648/38/9612/3911/3642/80279/2737/10718/10481/6926/7048/823/5308/3175/706/128239/3209/6778/6143/5916/87178/1499/3200/5111/440/84159/2627/5774/1956/657/2252/7372/596/1027/1605/205/7043/2131/81606/5471/10419/7128/6714/3239/5727/1050/3673/406…	132
SK-Mel-5	GO:0050808	synapse organization	127/3566	426/18723	4.16838e-08	2.36764e-05	1.87836e-05	6620/547/63827/1501/348/4137/999/6092/1287/7846/266727/115703/3913/56126/56127/5364/56125/8495/26052/56122/6792/56133/80725/23363/10013/5764/5802/56123/58512/288/10397/2064/400916/10160/80823/65981/55737/6640/5064/3897/57502/323/57717/23181/10497/5864/80728/10939/55906/4628/2258/119/78999/1855/1499/3312/2149/1981/4038/8496/7534/200933/203068/5792/831/85461/5216/22859/1605/3480/94030/3675/575/2045…	127
SK-Mel-5	GO:0051348	negative regulation of transferase activity	88/3566	268/18723	4.64939e-08	2.42078e-05	1.92052e-05	113791/348/4137/6609/5570/1031/55450/3315/56940/64798/80725/10715/8660/80851/10039/5569/1845/5305/80279/7157/5575/324/5170/9270/5339/29085/140775/5794/9647/1855/26973/26271/4085/151636/7013/10614/57732/6125/5347/10527/5062/3843/4869/6201/10251/7532/1027/54984/5580/7023/1843/9052/7128/6714/1050/90007/8692/5468/6546/9532/5787/54206/11221/5770/4067/4616/1026/153090/57493/161742/10221/79007/7538/6653…	88
SK-Mel-5	GO:0001667	ameboidal-type cell migration	138/3566	475/18723	6.20592e-08	2.98266e-05	2.36629e-05	5176/57556/3815/348/10512/11156/11167/51466/659/3037/25960/7042/2113/8503/51421/2896/4233/4163/5581/6662/2752/3728/393/3373/1954/1910/25959/3695/4215/2241/3315/9839/6385/80031/10013/5764/5629/51057/5797/8482/7763/3911/2185/5607/253943/3964/7048/5308/57449/5547/5170/9270/5339/2768/5793/9647/6868/27086/51094/10000/3688/493/116150/27161/9124/9404/84159/57381/2252/2822/5216/4780/3675/575/708/388/1960…	138
SK-Mel-5	GO:0006979	response to oxidative stress	131/3566	446/18723	6.69338e-08	2.98716e-05	2.36986e-05	695/348/538/4137/94241/10891/2034/2113/1410/4233/83636/22933/3373/143686/1244/2021/65018/2110/8996/11030/2241/3315/55139/2309/10013/3717/9973/50640/84181/6648/4323/93100/2686/2185/210/7157/135112/23135/4358/140885/8382/10494/1718/4700/2281/22921/5598/5164/5893/6778/90441/1965/87178/1499/3329/10280/80777/8678/2068/5831/4170/8013/5111/5052/5163/10549/3066/7486/9124/2067/10276/2353/116988/347/2643/1…	131
SK-Mel-5	GO:0005996	monosaccharide metabolic process	84/3566	257/18723	1.16835e-07	4.86658e-05	3.8609e-05	80201/3479/4485/10891/90673/5091/114897/32/10580/230/5165/283209/2548/23324/34/4125/8660/283310/1407/9852/5465/5160/2592/5208/7157/115209/5213/11188/3175/10499/5236/3667/283450/4123/5164/57486/5230/51094/55276/5209/221927/2648/2023/83440/6120/2597/5163/2519/4938/10447/11164/347/27230/9942/2822/84649/23509/2539/5166/6714/90007/6513/23516/84912/5167/2683/2582/467/9962/5366/3795/3487/4041/85414/8014…	84
SK-Mel-5	GO:0009156	ribonucleoside monophosphate biosynthetic process	20/3566	33/18723	1.64032e-07	6.40544e-05	5.08175e-05	54963/83549/3614/3615/2618/5198/7378/7372/5471/10606/8833/471/271/3251/1723/353/5631/5634/7371/100	20
SK-Mel-5	GO:0010975	regulation of neuron projection development	129/3566	445/18723	1.90037e-07	6.98442e-05	5.54108e-05	6387/547/5176/57556/5274/348/10512/4137/6092/6696/659/10154/23105/115703/2889/23373/2896/10090/9638/26039/65078/5526/393/1954/5364/26052/66008/9139/6792/112/53335/5361/5376/80725/80031/23363/5764/5802/1949/22906/116983/8482/29116/5756/22902/2185/80823/65981/9860/5365/3956/567/3897/57498/57580/10494/8724/55704/2281/9863/56965/64689/1522/2258/5793/9024/1855/84816/51657/4038/3066/5062/10300/1123/536…	129
SK-Mel-5	GO:0034660	ncRNA metabolic process	138/3566	485/18723	2.37447e-07	8.24203e-05	6.53881e-05	4137/6041/9775/192670/23053/55152/79731/131870/260294/155400/150962/10521/285381/55621/23016/51504/84128/6230/6130/87178/2193/10978/51202/10557/5073/24140/79828/55272/2068/65008/6125/51605/57647/51096/83732/92345/27161/29081/11157/55011/6155/348180/9875/54888/79707/54920/4809/115708/23212/27341/6201/6218/6208/51018/55127/3181/84154/134430/6129/54663/201164/9045/10200/54606/339175/53918/51002/5572…	138
SK-Mel-5	GO:0000302	response to reactive oxygen species	74/3566	222/18723	2.72573e-07	8.96333e-05	7.11105e-05	695/348/538/4137/10891/2113/1410/4233/3373/143686/2021/65018/2241/55139/2309/10013/9973/6648/2185/23135/4358/140885/10494/2281/5598/5164/6778/3329/10280/8678/5831/8013/5111/5052/3066/10276/2353/116988/347/2643/1956/10131/596/4780/5074/5580/3939/388/1843/8754/7128/6714/1728/8692/6546/2861/5829/2876/4217/133522/100/3725/1263/8877/10365/5156/6382/10516/9314/655/948/8061/3569/301	74
SK-Mel-5	GO:0048762	mesenchymal cell differentiation	77/3566	236/18723	4.18617e-07	0.000130776	0.000103751	57556/10512/3037/7042/6662/1910/2263/6591/147906/80031/8320/8482/3911/10439/6926/83989/7048/5308/10521/1499/51094/3066/57057/200734/3182/657/6949/596/1605/7043/2131/81610/84541/9723/182/4254/4208/55698/6934/90/10507/10505/55223/7046/7049/153090/161742/9221/84172/4088/54910/7474/6405/6422/80709/2668/1000/223117/4092/80139/10371/55273/25937/753/9464/655/10501/23462/3569/6615/51176/3280/30812/10252/…	77
SK-Mel-5	GO:0016049	cell growth	136/3566	482/18723	4.86168e-07	0.000144647	0.000114755	6387/3479/57556/348/3490/10512/4137/6696/659/7042/23105/3913/26053/1410/6662/65078/393/3373/1031/1954/23677/84162/6792/400410/53335/147906/5361/80031/10013/5802/29948/8482/5465/4323/84861/2064/22902/2185/5607/6548/65981/80208/10439/10718/3275/7157/3897/7048/6595/65059/84687/2258/604/5916/1855/6868/1499/51094/26999/3621/1981/51760/734/221927/2023/3320/3688/79960/9792/440275/2273/10276/4869/1956/21…	136
SK-Mel-5	GO:0031667	response to nutrient levels	134/3566	474/18723	5.2447e-07	0.00014895	0.000118169	2696/9227/7942/348/6696/10891/659/2621/56477/3157/23530/8658/32/22933/2752/167359/143686/10325/25959/56603/717/58528/23408/3155/22863/7442/11337/55846/64121/2309/34/6591/220441/10634/5764/7299/5629/8648/38/6648/53349/5465/178/210/9681/7157/23334/5292/23710/5723/1515/115209/23274/7048/706/1327/2281/583/27072/5164/5339/9024/8520/3178/1965/2182/3312/662/8678/1981/2648/440275/7486/2067/440/7378/1956/…	134
SK-Mel-5	GO:1904874	positive regulation of telomerase RNA localization to Cajal body	12/3566	15/18723	5.73253e-07	0.000150444	0.000119355	6950/92345/7203/22948/10575/10856/10694/10574/10576/1736/8607/55651	12
SK-Mel-5	GO:0048709	oligodendrocyte differentiation	39/3566	95/18723	5.79907e-07	0.000150444	0.000119355	443/8506/5354/128853/6662/3766/1031/11076/79885/5764/2064/83933/2737/745/9580/1267/55553/1499/2068/8891/3066/1605/10419/1191/8892/11221/4067/22891/23500/27242/85414/7133/9331/1745/5803/3280/30812/1746/10215	39
SK-Mel-5	GO:0060560	developmental growth involved in morphogenesis	76/3566	234/18723	6.0689e-07	0.000150444	0.000119355	6387/57556/348/10512/4137/6696/659/23105/2099/3913/26053/6662/65078/393/1954/6792/2263/53335/5361/80031/10013/5802/8482/22902/80208/10439/3897/7048/9863/65059/2258/5916/1855/1499/26999/51760/3320/3688/440275/214/2131/2045/114804/9353/3326/3239/9723/51393/6495/10507/55083/10505/6909/51804/8851/343472/7422/9962/9423/54910/7474/6405/6422/223117/8437/6299/6586/10371/10501/4133/23025/3676/10252/10253/…	76
SK-Mel-5	GO:0006084	acetyl-CoA metabolic process	20/3566	35/18723	6.26049e-07	0.000150444	0.000119355	10157/3157/32/4597/5165/283927/84532/38/5160/55902/4598/23181/1738/5164/25874/5163/134526/51166/5166/8942	20
SK-Mel-5	GO:0060485	mesenchyme development	90/3566	291/18723	6.75684e-07	0.0001553	0.000123207	57556/59/10512/6092/659/3037/7042/10683/6662/1910/2263/54796/6591/147906/80031/8320/8482/3911/10439/6926/83989/7048/5308/2297/10521/1499/51094/677/3066/57057/56983/200734/3182/657/6949/596/1605/7043/2131/81610/84541/9723/182/4254/4208/55698/6934/6495/90/10507/10505/55223/6909/7046/7049/51804/153090/161742/4609/9221/84172/4088/54910/7474/6405/6422/80709/2668/1000/223117/4092/80139/10371/55273/2593…	90
SK-Mel-5	GO:0010721	negative regulation of cell development	62/3566	180/18723	6.95966e-07	0.0001553	0.000123207	3479/57556/10512/6696/10683/23105/22933/65078/393/1910/66008/7442/53335/80031/5764/5802/1949/8482/22902/567/7157/706/64689/9270/2258/1499/1495/4038/657/4882/283659/2633/2045/5047/9723/1903/11221/10507/2200/10505/8851/23500/7422/1946/81/9423/54910/7474/6653/6405/11023/223117/10371/3397/655/10501/1745/4133/3569/3280/1746/81848	62
SK-Mel-5	GO:0007411	axon guidance	74/3566	227/18723	7.23416e-07	0.000155859	0.00012365	6387/57556/10512/27255/6092/659/10154/3913/9638/1954/5364/23077/3909/5361/80031/1949/5797/8482/3911/2064/2737/5365/3897/2044/2297/3800/3908/6477/1855/55740/6152/1123/5362/214/10678/91624/1605/2131/2045/9353/7408/23768/5727/133418/9723/23022/10507/10505/10381/8851/4854/4983/219699/1944/7422/1946/8633/9423/54910/7474/6405/11023/2668/223117/1959/6586/10371/1969/655/10501/10752/2115/9369/4897	74
SK-Mel-5	GO:0097485	neuron projection guidance	74/3566	228/18723	8.73753e-07	0.000181974	0.000144369	6387/57556/10512/27255/6092/659/10154/3913/9638/1954/5364/23077/3909/5361/80031/1949/5797/8482/3911/2064/2737/5365/3897/2044/2297/3800/3908/6477/1855/55740/6152/1123/5362/214/10678/91624/1605/2131/2045/9353/7408/23768/5727/133418/9723/23022/10507/10505/10381/8851/4854/4983/219699/1944/7422/1946/8633/9423/54910/7474/6405/11023/2668/223117/1959/6586/10371/1969/655/10501/10752/2115/9369/4897	74
SK-Mel-5	GO:0072073	kidney epithelium development	50/3566	136/18723	9.23151e-07	0.00018606	0.00014761	9788/6092/4435/4091/28999/3913/6662/26249/25959/2263/6385/8842/38/4643/3911/2737/9863/2297/5455/1499/596/79191/2131/2045/9353/5727/182/4208/2247/384/6495/55083/51804/4609/7422/4088/6422/2668/6382/4092/6299/80000/25937/655/7490/3280/30812/65266/3976/10252	50
SK-Mel-5	GO:0019318	hexose metabolic process	76/3566	237/18723	1.05727e-06	0.000206431	0.000163772	80201/3479/4485/10891/90673/5091/114897/32/10580/230/5165/283209/2548/23324/34/4125/8660/1407/9852/5465/5160/2592/5208/7157/115209/5213/11188/3175/10499/5236/3667/283450/4123/5164/57486/5230/51094/55276/5209/221927/2648/2023/83440/2597/5163/2519/4938/10447/347/27230/2822/84649/23509/2539/5166/6714/90007/23516/84912/5167/2683/2582/467/5366/3795/3487/4041/85414/1374/2171/8445/3099/4837/5507/5210/72…	76
SK-Mel-5	GO:0002181	cytoplasmic translation	53/3566	148/18723	1.1346e-06	0.000214818	0.000170426	64506/22849/285381/6143/6128/6159/6230/6130/6231/6187/8668/6193/24140/10480/8666/1981/6125/6147/6233/8664/3921/8891/6164/3646/6161/6133/6152/8894/6144/6155/6173/6142/6201/6218/6208/6129/6189/6124/9045/2107/11224/6165/55854/51121/8669/1802/8662/6204/6139/6171/8531/200916/6217	53
SK-Mel-5	GO:1904872	regulation of telomerase RNA localization to Cajal body	13/3566	18/18723	1.38807e-06	0.000255078	0.000202366	5073/6950/92345/7203/22948/10575/10856/10694/10574/10576/1736/8607/55651	13
SK-Mel-5	GO:0009161	ribonucleoside monophosphate metabolic process	27/3566	58/18723	1.73163e-06	0.000309121	0.000245241	221264/260425/203/54963/83549/9414/3614/3615/2618/5198/7378/7372/205/5471/10606/8833/471/271/3251/1723/353/5631/5634/7371/4860/100/4907	27
SK-Mel-5	GO:0050770	regulation of axonogenesis	54/3566	154/18723	1.90648e-06	0.000320724	0.000254446	6387/57556/10512/4137/6092/6696/659/10154/23105/10090/65078/393/1954/5364/66008/6792/5361/80031/5802/1949/22906/8482/22902/5365/3897/10494/2258/9024/4038/5062/1123/5362/2045/9353/57463/84446/9723/26230/26037/51393/10507/10505/8851/7422/9423/54910/7474/6405/1000/223117/10371/10501/4133/5454	54
SK-Mel-5	GO:0060411	cardiac septum morphogenesis	30/3566	68/18723	1.91485e-06	0.000320724	0.000254446	10512/6092/659/7042/4091/6659/2263/55742/5629/7157/6926/7048/57057/2627/657/9353/182/407975/90/6909/7046/7049/7474/4092/6586/53834/4036/655/23462/3280	30
SK-Mel-5	GO:0034329	cell junction assembly	119/3566	420/18723	1.98072e-06	0.000320724	0.000254446	1005/1501/8506/1010/999/6092/1307/266727/2889/56126/10580/56127/3728/8861/83660/5364/56125/26052/22998/56122/23562/56133/8777/6591/56940/6385/23363/5802/56123/51057/4867/4323/1845/2185/10160/80823/6548/1008/55737/57502/57717/79834/324/5170/7205/9270/5339/2258/9647/119/78999/1855/1499/1495/1981/4038/5062/200933/347/10052/596/94030/79191/575/28513/23136/2045/3915/84612/23768/6714/100506658/57463/36…	119
SK-Mel-5	GO:0048846	axon extension involved in axon guidance	20/3566	37/18723	2.06598e-06	0.000320724	0.000254446	6387/57556/10512/659/1954/80031/8482/214/9353/9723/10507/10505/7422/54910/7474/6405/223117/6586/10371/10501	20
SK-Mel-5	GO:1902284	neuron projection extension involved in neuron projection guidance	20/3566	37/18723	2.06598e-06	0.000320724	0.000254446	6387/57556/10512/659/1954/80031/8482/214/9353/9723/10507/10505/7422/54910/7474/6405/223117/6586/10371/10501	20
SK-Mel-5	GO:0050919	negative chemotaxis	23/3566	46/18723	2.158e-06	0.000320724	0.000254446	57556/10512/6092/80031/8482/10718/3685/2045/9353/23768/9723/10507/10505/8633/9423/54910/7474/6405/223117/6586/10371/10501/3690	23
SK-Mel-5	GO:0001666	response to hypoxia	92/3566	307/18723	2.30947e-06	0.000320724	0.000254446	6387/112399/538/18/10891/2034/7423/7042/2113/28996/1410/29988/5581/50809/22933/5165/2021/65018/8996/2309/64506/5764/10397/6648/5465/4323/2185/6548/9915/210/7157/7048/10449/5230/6868/3329/677/29923/8678/2068/5351/2023/5163/79723/9124/2627/26608/596/1027/205/4780/7043/3939/3776/6714/191/3673/6513/30001/6546/3708/23576/219736/27087/1978/7049/1958/4609/7422/100/1263/4088/3709/5366/56776/6422/3654/628…	92
SK-Mel-5	GO:0046148	pigment biosynthetic process	28/3566	62/18723	2.3746e-06	0.000320724	0.000254446	7306/538/1638/4948/4435/6490/51151/4935/7220/5498/1497/9839/7299/1652/210/706/3145/2618/5471/10606/8833/3251/353/5631/1371/100/402055/7474	28
SK-Mel-5	GO:0034614	cellular response to reactive oxygen species	54/3566	155/18723	2.38914e-06	0.000320724	0.000254446	695/538/4137/2113/4233/2021/65018/2241/55139/2309/10013/9973/6648/23135/4358/140885/10494/5598/5164/6778/10280/8678/5831/8013/5111/5052/3066/10276/2353/116988/2643/1956/10131/4780/5074/5580/388/7128/6714/1728/2861/5829/4217/133522/3725/8877/10365/5156/10516/9314/655/948/3569/301	54
SK-Mel-5	GO:0034616	response to laminar fluid shear stress	11/3566	14/18723	2.42455e-06	0.000320724	0.000254446	4091/2113/5607/5598/4780/7043/8754/19/10365/4092/9314	11
SK-Mel-5	GO:1904814	regulation of protein localization to chromosome, telomeric region	11/3566	14/18723	2.42455e-06	0.000320724	0.000254446	7013/6950/7203/54552/22948/10575/10694/10574/10576/1736/26354	11
SK-Mel-5	GO:0031345	negative regulation of cell projection organization	62/3566	186/18723	2.44264e-06	0.000320724	0.000254446	57556/348/10512/6696/51466/23105/65078/393/115704/26052/83478/66008/9139/5909/112/53335/5376/80031/5802/1949/8482/29116/22902/9860/5365/3956/567/64689/1522/2258/5793/23329/4038/3066/10251/7431/3675/1809/5580/2045/9353/349667/5621/9723/2288/10507/10505/22891/8851/9423/54910/7474/6405/223117/2904/10371/3397/10501/4133/1902/22876/10253	62
SK-Mel-5	GO:0019693	ribose phosphate metabolic process	113/3566	396/18723	2.46395e-06	0.000320724	0.000254446	80201/3479/8034/221264/10891/26137/4967/108/10157/3157/32/260425/230/5144/137964/4597/80221/111/5165/65018/256281/3155/283927/203/57678/54963/112/9605/84532/55753/83549/957/23433/38/5465/5160/9414/9200/5836/131870/84836/5208/8382/5213/10846/55902/4598/5236/23181/1738/5164/10005/25874/5230/2182/3614/2023/83440/2597/5163/3615/2618/5198/134526/7378/5901/11164/107/5563/4833/51144/7372/4882/205/51166/…	113
SK-Mel-5	GO:0062197	cellular response to chemical stress	99/3566	337/18723	2.57793e-06	0.000328524	0.000260634	695/80303/538/4137/94241/10891/2034/2113/4233/79085/22933/2021/65018/8996/2241/3315/55139/2309/10013/3717/9973/50640/84181/6648/7157/9990/135112/4638/65267/23135/4358/140885/8382/10494/706/5598/5164/5893/5339/6778/90441/1965/87178/1499/10280/677/8678/5831/4170/8013/5111/5052/5163/3066/10276/2353/116988/2643/1956/5563/10131/596/4780/5074/5580/388/2539/7128/6714/1728/6513/2861/54206/5829/8531/27429…	99
SK-Mel-5	GO:0022612	gland morphogenesis	44/3566	118/18723	2.62903e-06	0.000328524	0.000260634	23213/10512/55959/7042/2099/6662/2263/10116/5361/5764/5629/3911/2737/10718/10481/6926/7048/823/3209/6778/5916/2252/596/1605/7043/7128/6714/3239/5727/7039/6909/9423/7474/6422/4041/10371/1051/1969/7052/655/3569/634/7421/3371	44
SK-Mel-5	GO:1904816	positive regulation of protein localization to chromosome, telomeric region	10/3566	12/18723	2.80922e-06	0.000344157	0.000273036	6950/7203/54552/22948/10575/10694/10574/10576/1736/26354	10
SK-Mel-5	GO:0001933	negative regulation of protein phosphorylation	100/3566	342/18723	2.88546e-06	0.000346699	0.000275053	348/10891/4091/64780/6609/23530/22933/5144/5570/1031/22863/55450/3315/56940/84327/64798/80725/91663/80851/5569/1845/3642/80279/140885/5575/324/808/5170/9270/5339/1756/140775/5794/9647/1855/26973/10614/1981/57732/5347/10527/5062/3843/199731/200734/4869/10251/7532/1027/5580/7023/1843/9353/9052/7128/1050/100506658/8692/409/5621/9770/5468/6546/84063/5787/54206/11221/5770/10507/5167/4067/4616/1026/153…	100
SK-Mel-5	GO:0001655	urogenital system development	99/3566	338/18723	2.97301e-06	0.000350479	0.000278052	3248/5176/23213/59/55959/9788/6092/3037/4435/7042/4091/6659/7020/2099/28999/3913/6662/26249/25959/56603/2263/10116/6385/8842/11020/5629/51057/38/4643/3911/2737/10481/4358/51107/9863/2297/5455/3209/5916/1499/4038/842/84159/596/1027/79191/56913/3675/2131/5471/2045/1282/9353/3570/3239/5727/8692/182/4208/2247/55840/54475/384/6495/2200/55083/7046/51804/4311/25976/1958/4609/10758/7422/9510/4088/341640/…	99
SK-Mel-5	GO:1903829	positive regulation of cellular protein localization	84/3566	276/18723	3.19687e-06	0.000366105	0.000290449	54550/4137/999/27113/10347/5581/10580/3728/79608/65018/245812/5764/3717/22885/288/55929/2064/80279/6711/2737/9860/51160/57506/65267/6809/25999/29801/55704/4926/324/5170/9270/84687/65992/7037/151636/6950/9141/3688/5347/4038/493/3843/7203/54552/4869/5901/1956/5563/22948/10575/9531/3675/54984/10694/5580/10574/3326/10576/6714/2181/8692/7545/5621/1736/2040/83666/4130/27429/26354/163882/8851/58489/4088…	84
SK-Mel-5	GO:0050767	regulation of neurogenesis	105/3566	364/18723	3.24723e-06	0.000366105	0.000290449	6387/443/5176/57556/3815/79365/10512/1638/3398/4137/6092/6696/659/10154/10683/23105/22933/26039/65078/393/1954/5364/66008/6792/5361/80031/23363/5764/5802/1949/3213/22906/8482/55502/22902/80823/65981/85440/2737/5365/567/7157/3897/10494/706/56965/64689/2258/1499/1495/55179/27339/4038/3066/5362/1956/657/1605/283659/2045/10419/9353/57463/9723/26230/51393/11221/10507/4067/10505/22891/8851/4311/23500/7…	105
SK-Mel-5	GO:0034405	response to fluid shear stress	19/3566	35/18723	3.41952e-06	0.000366105	0.000290449	9788/3037/4091/2113/2185/5607/5598/5339/4780/7043/8754/6714/4208/19/10365/4092/9314/7980/5743	19
SK-Mel-5	GO:0001822	kidney development	88/3566	293/18723	3.43514e-06	0.000366105	0.000290449	3248/5176/23213/59/55959/9788/6092/3037/4435/7042/4091/6659/7020/28999/3913/6662/26249/25959/56603/2263/6385/8842/11020/5629/51057/38/4643/3911/2737/4358/51107/9863/2297/5455/1499/4038/842/84159/596/79191/56913/3675/2131/5471/2045/9353/3570/5727/8692/182/4208/2247/54475/384/6495/2200/55083/7046/51804/4311/25976/1958/4609/10758/7422/9510/4088/341640/7474/5156/6422/2668/51196/6382/4092/6299/80000/2…	88
SK-Mel-5	GO:0090670	RNA localization to Cajal body	13/3566	19/18723	3.62474e-06	0.000366105	0.000290449	5073/6950/92345/7203/22948/10575/10856/10694/10574/10576/1736/8607/55651	13
SK-Mel-5	GO:0090671	telomerase RNA localization to Cajal body	13/3566	19/18723	3.62474e-06	0.000366105	0.000290449	5073/6950/92345/7203/22948/10575/10856/10694/10574/10576/1736/8607/55651	13
SK-Mel-5	GO:0090672	telomerase RNA localization	13/3566	19/18723	3.62474e-06	0.000366105	0.000290449	5073/6950/92345/7203/22948/10575/10856/10694/10574/10576/1736/8607/55651	13
SK-Mel-5	GO:0090685	RNA localization to nucleus	13/3566	19/18723	3.62474e-06	0.000366105	0.000290449	5073/6950/92345/7203/22948/10575/10856/10694/10574/10576/1736/8607/55651	13
SK-Mel-5	GO:0030308	negative regulation of cell growth	62/3566	188/18723	3.63293e-06	0.000366105	0.000290449	57556/10512/6696/659/7042/23105/1410/65078/393/3373/1031/23677/400410/53335/147906/80031/5802/29948/8482/5465/65981/7157/6595/84687/2258/604/51094/3621/734/2023/79960/9792/2273/596/1027/2045/9353/2539/85004/8692/9723/55840/10507/5167/10505/1026/8851/5270/9423/4088/54910/7474/6405/6422/223117/131566/6586/10371/7490/10501/4133/58189	62
SK-Mel-5	GO:0006006	glucose metabolic process	64/3566	196/18723	3.71033e-06	0.000367971	0.000291929	3479/4485/10891/90673/5091/114897/32/10580/5165/283209/2548/34/8660/1407/9852/5465/5160/5208/7157/115209/5213/11188/3175/10499/5236/3667/283450/5164/57486/5230/51094/55276/221927/2648/2023/83440/2597/5163/4938/10447/347/27230/2822/84649/2539/5166/6714/90007/23516/84912/5167/467/5366/3795/3487/4041/85414/1374/2171/8445/3099/4837/5507/7262	64
SK-Mel-5	GO:0006469	negative regulation of protein kinase activity	68/3566	212/18723	3.77367e-06	0.000368364	0.000292241	348/6609/5570/1031/55450/3315/56940/64798/80725/80851/5569/1845/80279/5575/324/5170/9270/5339/140775/5794/9647/1855/26973/10614/57732/5347/10527/5062/3843/4869/10251/7532/1027/5580/7023/1843/9052/7128/1050/8692/5468/6546/5787/54206/11221/5770/4067/4616/1026/153090/57493/161742/10221/79007/6653/6422/4041/9467/57761/25937/655/10019/634/1028/84959/10252/10253/81848	68
SK-Mel-5	GO:0001503	ossification	115/3566	408/18723	3.83221e-06	0.000368364	0.000292241	3479/58476/645811/6096/6696/659/4435/7042/4091/7020/7059/6662/7067/5364/57560/79412/10457/1291/54795/2263/6591/5764/525/8482/4323/6272/22904/10140/537/2185/5608/2737/6238/4488/649/50617/7286/1893/1499/26271/2068/864/4038/656/10189/22800/57003/10492/1956/657/865/2822/596/4882/91461/7043/2131/26156/1192/3570/3726/5727/1050/2091/7071/115908/182/9770/5468/6546/56172/23560/55787/4208/10514/2247/6678/4…	115
SK-Mel-5	GO:0010001	glial cell differentiation	71/3566	225/18723	4.47216e-06	0.000423365	0.000335876	443/8506/5354/3398/4137/128853/6659/28999/3913/2896/6662/5453/22933/3766/1031/11076/79885/5764/10397/2064/83933/2737/745/9580/1267/10319/55553/3908/5339/25825/1499/2068/27339/8891/3066/1956/7431/1605/4919/10419/1191/2247/8892/1840/11221/57211/4067/22891/1021/23500/79628/27242/5270/85414/6285/1000/1959/7133/9331/1745/3569/10675/51176/5803/5454/375387/3280/30812/3976/1746/10215	71
SK-Mel-5	GO:1990823	response to leukemia inhibitory factor	37/3566	95/18723	4.96746e-06	0.000463234	0.000367506	9227/11240/11156/22904/2494/29088/5826/9145/587/5916/6723/7037/22823/8322/84159/7091/10678/2131/6432/4691/2730/1840/8731/9242/6217/129401/26577/9021/4092/54941/9314/4744/3383/3099/29887/10253/81848	37
SK-Mel-5	GO:2000278	regulation of DNA biosynthetic process	40/3566	106/18723	5.24127e-06	0.00048158	0.000382061	659/8658/5570/10715/10039/2185/7157/79618/8550/3178/1499/5073/7013/6950/3320/5984/27000/5111/92345/7203/54552/3181/22948/10575/5983/54984/10694/3776/10574/1843/3326/10576/6714/409/1736/2247/1026/4609/9314/2264	40
SK-Mel-5	GO:0071456	cellular response to hypoxia	52/3566	151/18723	5.35031e-06	0.000484475	0.000384357	112399/538/10891/2034/28996/5581/50809/22933/5165/2021/65018/8996/2309/64506/5764/10397/6548/7157/10449/5230/677/29923/2023/5163/79723/2627/26608/596/205/4780/3776/6714/30001/6546/23576/219736/27087/1978/1958/4609/7422/1263/5366/56776/6422/3654/6285/3383/7015/5743/655/6781	52
SK-Mel-5	GO:0048545	response to steroid hormone	98/3566	339/18723	6.15613e-06	0.000549478	0.000435928	5176/3490/11240/57658/85315/478/6696/84676/3176/7042/2104/2099/2805/1244/25959/10081/8031/4306/2309/10013/5764/3717/21/1407/8648/9612/5465/1408/178/210/3275/2908/1515/7048/57617/10499/7181/706/9604/5187/6257/808/10062/10521/55128/84687/65992/3329/27086/677/8013/5111/842/6155/7035/2353/1956/596/7043/81606/7023/1843/9353/8754/79039/6714/114907/1977/6678/54206/57178/164091/1026/9076/133522/7538/2354…	98
SK-Mel-5	GO:0051384	response to glucocorticoid	51/3566	148/18723	6.42191e-06	0.000559231	0.000443666	5176/3490/84676/3176/2805/1244/10081/2309/21/178/210/2908/1515/808/3329/677/5111/842/2353/1956/596/7023/1843/9353/8754/114907/1977/6678/54206/1026/9076/133522/7538/2354/590/6285/6382/306/595/6586/3383/2690/54541/5743/8061/23462/3569/687/301/1369/6781	51
SK-Mel-5	GO:1904888	cranial skeletal system development	29/3566	68/18723	6.44441e-06	0.000559231	0.000443666	7042/7020/1112/7289/1954/9775/3638/57728/2263/4323/2737/4488/9742/7048/84314/10265/1499/29985/7043/2131/3198/25902/6495/7046/51804/4088/5156/4325/1746	29
SK-Mel-5	GO:0071559	response to transforming growth factor beta	78/3566	256/18723	6.74515e-06	0.000562657	0.000446383	3248/9315/79674/10891/128853/4435/7042/4091/28996/6662/4093/2805/64838/858/2263/9839/56940/64081/5465/7157/2908/7048/55553/3175/5598/5170/6868/677/9141/864/3066/200734/9404/2353/657/81031/1284/7043/3675/2280/8754/5654/3326/6714/8692/409/407975/5468/4208/5829/90/2200/5045/3693/57178/7046/7049/161742/9076/2201/3725/4088/7474/6422/23089/4092/80139/135228/3397/55612/753/1745/1028/375387/9518/10252/10…	78
SK-Mel-5	GO:0042176	regulation of protein catabolic process	110/3566	391/18723	6.77001e-06	0.000562657	0.000446383	114881/348/999/255488/2272/84074/28996/144165/754/6662/22933/83547/10444/65018/23077/7077/11337/5476/1017/10297/27352/302/29116/80279/29978/2185/210/55737/9860/51160/7879/256471/55070/51136/11236/55743/84961/8724/9604/79888/324/285671/26234/2768/11146/65992/10197/1855/5708/10134/4085/5706/55353/6125/5702/3320/5700/5347/10213/8312/6201/51377/25897/5774/56893/1956/2822/1457/29763/1027/4780/575/5133…	110
SK-Mel-5	GO:0051960	regulation of nervous system development	122/3566	443/18723	6.79486e-06	0.000562657	0.000446383	6387/443/5176/57556/3815/79365/10512/1638/3398/4137/6092/6696/659/10154/10683/23105/22933/26039/65078/393/1954/5364/66008/11076/6792/23175/5361/80031/23363/5764/5802/1949/3213/22906/8482/55502/22902/80823/65981/85440/2737/5365/567/7157/745/3897/10494/706/56965/64689/2258/5916/1499/1495/55179/27339/4038/3066/5362/1956/657/1605/283659/94030/575/2045/10419/9353/23768/57463/9723/375790/26230/84189/51…	122
SK-Mel-5	GO:0009267	cellular response to starvation	53/3566	156/18723	6.84409e-06	0.000562657	0.000446383	7942/659/2621/2752/167359/143686/10325/58528/22863/11337/55846/64121/2309/220441/10634/53349/5465/9681/7157/23334/23710/1515/23274/27072/9024/3178/1965/3312/8678/440275/7486/440/7378/5563/26608/596/4780/3428/5166/84446/7071/6513/10514/81929/4217/84879/55630/1026/467/3725/5366/6422/9891	53
SK-Mel-5	GO:0072001	renal system development	89/3566	302/18723	7.04054e-06	0.000571289	0.000453232	3248/5176/23213/59/55959/9788/6092/3037/4435/7042/4091/6659/7020/28999/3913/6662/26249/25959/56603/2263/6385/8842/11020/5629/51057/38/4643/3911/2737/4358/51107/9863/2297/5455/1499/4038/842/84159/596/79191/56913/3675/2131/5471/2045/1282/9353/3570/5727/8692/182/4208/2247/54475/384/6495/2200/55083/7046/51804/4311/25976/1958/4609/10758/7422/9510/4088/341640/7474/5156/6422/2668/51196/6382/4092/6299/80…	89
SK-Mel-5	GO:0000463	maturation of LSU-rRNA from tricistronic rRNA transcript (SSU-rRNA, 5.8S rRNA, LSU-rRNA)	11/3566	15/18723	7.51563e-06	0.000602021	0.000477613	9875/79707/84154/6129/11224/8886/285855/84365/23481/23560/23246	11
SK-Mel-5	GO:0014031	mesenchymal cell development	34/3566	86/18723	8.08551e-06	0.000631478	0.000500982	57556/10512/6662/1910/6591/80031/8482/3911/83989/5308/57057/657/6949/596/84541/9723/182/4254/55698/90/10507/10505/9221/54910/6405/2668/1000/223117/10371/9464/655/10501/3280/30812	34
SK-Mel-5	GO:0048864	stem cell development	34/3566	86/18723	8.08551e-06	0.000631478	0.000500982	57556/10512/6662/1910/124540/6591/80031/8482/3911/83989/5308/657/6949/84541/9723/182/4254/55698/2247/90/10507/10505/9221/54910/6405/2668/1000/223117/10371/9464/655/10501/3280/30812	34
SK-Mel-5	GO:0043586	tongue development	13/3566	20/18723	8.54247e-06	0.000656606	0.000520918	3815/56603/54796/51057/2737/1499/3066/1956/6495/51804/7480/9464/51176	13
SK-Mel-5	GO:0033673	negative regulation of kinase activity	73/3566	237/18723	8.61743e-06	0.000656606	0.000520918	113791/348/4137/6609/5570/1031/55450/3315/56940/64798/80725/8660/80851/5569/1845/5305/80279/5575/324/5170/9270/5339/140775/5794/9647/1855/26973/10614/57732/5347/10527/5062/3843/4869/10251/7532/1027/5580/7023/1843/9052/7128/1050/90007/8692/5468/6546/5787/54206/11221/5770/4067/4616/1026/153090/57493/161742/10221/79007/6653/6422/4041/9467/57761/25937/655/10019/634/1028/84959/10252/10253/81848	73
SK-Mel-5	GO:0071560	cellular response to transforming growth factor beta stimulus	76/3566	250/18723	9.61791e-06	0.000720356	0.000571493	3248/9315/79674/10891/128853/4435/7042/4091/28996/6662/4093/2805/858/2263/9839/56940/64081/5465/7157/2908/7048/55553/3175/5598/5170/6868/677/9141/3066/200734/9404/2353/657/81031/1284/7043/3675/2280/8754/5654/3326/6714/8692/409/407975/5468/4208/5829/90/2200/5045/3693/57178/7046/7049/161742/9076/2201/3725/4088/7474/6422/23089/4092/80139/135228/3397/55612/753/1745/1028/375387/9518/10252/10253/7057	76
SK-Mel-5	GO:0031668	cellular response to extracellular stimulus	75/3566	246/18723	9.79934e-06	0.000720356	0.000571493	7942/659/2621/8658/2752/167359/143686/10325/25959/58528/22863/11337/55846/64121/2309/6591/220441/10634/5764/8648/53349/5465/9681/7157/23334/5292/23710/1515/23274/27072/5164/5339/79792/84687/9024/3178/1965/3312/8678/1981/440275/7486/440/7378/2353/5563/26608/596/4780/3428/5166/84446/7071/6513/10514/79077/81929/4217/4067/84879/55630/1026/467/3725/5366/6422/4929/9891/4023/3383/8061/3676/7421/90226/33…	75
SK-Mel-5	GO:0060412	ventricular septum morphogenesis	20/3566	40/18723	9.91527e-06	0.000720356	0.000571493	6092/659/7042/6659/2263/5629/6926/7048/657/9353/407975/90/7046/7049/7474/4092/6586/53834/23462/3280	20
SK-Mel-5	GO:0071526	semaphorin-plexin signaling pathway	20/3566	40/18723	9.91527e-06	0.000720356	0.000571493	57556/10512/10154/4233/5364/5361/80031/8482/5365/5362/9723/10507/10505/54910/6405/2668/223117/10371/9464/10501	20
SK-Mel-5	GO:0070482	response to oxygen levels	99/3566	347/18723	1.01698e-05	0.000730286	0.000579371	6387/112399/538/18/10891/2034/7423/7042/2113/28996/1410/29988/5581/50809/22933/5165/2021/65018/8996/2309/64506/5764/10397/6648/5465/4323/9114/84317/537/2185/6548/9915/210/7157/7048/10449/5230/23545/6868/3329/677/662/29923/8678/2068/5351/2023/5163/3066/79723/9124/2627/26608/596/1027/205/4780/7043/3939/3776/6714/191/3673/6513/30001/6546/3708/23576/219736/1026/27087/1978/7049/1958/4609/7422/100/1263…	99
SK-Mel-5	GO:1990830	cellular response to leukemia inhibitory factor	36/3566	94/18723	1.03549e-05	0.000730286	0.000579371	9227/11240/11156/22904/2494/29088/5826/9145/587/5916/6723/7037/22823/8322/84159/7091/10678/6432/4691/2730/1840/8731/9242/6217/129401/26577/9021/4092/54941/9314/4744/3383/3099/29887/10253/81848	36
SK-Mel-5	GO:2000573	positive regulation of DNA biosynthetic process	28/3566	66/18723	1.04419e-05	0.000730286	0.000579371	8658/5570/2185/79618/8550/3178/1499/5073/6950/3320/5984/5111/92345/7203/22948/10575/5983/10694/10574/3326/10576/6714/409/1736/2247/4609/9314/2264	28
SK-Mel-5	GO:0034599	cellular response to oxidative stress	85/3566	288/18723	1.05195e-05	0.000730286	0.000579371	695/538/4137/94241/10891/2034/2113/4233/22933/2021/65018/8996/2241/3315/55139/2309/10013/3717/9973/50640/84181/6648/7157/135112/23135/4358/140885/8382/10494/5598/5164/5893/6778/90441/1965/87178/1499/10280/8678/5831/4170/8013/5111/5052/5163/3066/10276/2353/116988/2643/1956/5563/10131/596/4780/5074/5580/388/2539/7128/6714/1728/2861/5829/27429/2876/4217/154807/140809/54033/133522/3725/4248/8877/1036…	85
SK-Mel-5	GO:1900182	positive regulation of protein localization to nucleus	34/3566	87/18723	1.08623e-05	0.000739286	0.000586511	999/3728/3717/55929/80279/2737/57506/7037/151636/6950/5347/3843/7203/4869/5901/22948/10575/9531/54984/10694/5580/10574/3326/10576/6714/8692/7545/1736/83666/4088/25937/7015/5743/3976	34
SK-Mel-5	GO:0036293	response to decreased oxygen levels	93/3566	322/18723	1.0927e-05	0.000739286	0.000586511	6387/112399/538/18/10891/2034/7423/7042/2113/28996/1410/29988/5581/50809/22933/5165/2021/65018/8996/2309/64506/5764/10397/6648/5465/4323/2185/6548/9915/210/7157/7048/10449/5230/6868/3329/677/662/29923/8678/2068/5351/2023/5163/79723/9124/2627/26608/596/1027/205/4780/7043/3939/3776/6714/191/3673/6513/30001/6546/3708/23576/219736/27087/1978/7049/1958/4609/7422/100/1263/4088/3709/5366/56776/6422/3654…	93
SK-Mel-5	GO:0048675	axon extension	43/3566	120/18723	1.10041e-05	0.000739286	0.000586511	6387/57556/348/10512/4137/659/3913/26053/65078/393/1954/6792/80031/5802/8482/22902/80208/10439/3897/65059/1855/3320/3688/214/9353/3326/9723/51393/10507/10505/8851/343472/7422/9423/54910/7474/6405/223117/6586/10371/10501/4133/4897	43
SK-Mel-5	GO:0046390	ribose phosphate biosynthetic process	61/3566	190/18723	1.12498e-05	0.000747752	0.000593228	8034/221264/10891/108/32/111/5165/65018/203/54963/112/9605/84532/83549/38/5465/5160/9200/5836/8382/55902/23181/1738/5164/25874/2182/3614/2023/5163/3615/2618/5198/7378/107/4833/51144/7372/4882/205/5471/10606/8833/2539/5166/2181/471/1503/271/3251/11332/9060/1723/4830/353/2180/5631/5634/7371/109/1836/54898	61
SK-Mel-5	GO:1904029	regulation of cyclin-dependent protein kinase activity	37/3566	98/18723	1.14909e-05	0.000755741	0.000599566	27013/901/1031/55450/5629/80279/324/902/904/56647/6868/10614/5347/10527/54619/3843/1956/896/898/990/1022/1027/7023/641/79616/1164/3326/7128/6714/1050/23560/993/219736/1026/8851/595/1028	37
SK-Mel-5	GO:0014033	neural crest cell differentiation	35/3566	91/18723	1.22539e-05	0.00079663	0.000632005	57556/10512/6662/1910/6591/80031/8482/3911/83989/5308/657/6949/2131/84541/9723/182/4254/4208/55698/90/10507/10505/9221/54910/6405/6422/2668/1000/223117/10371/9464/655/10501/3280/30812	35
SK-Mel-5	GO:0070203	regulation of establishment of protein localization to telomere	9/3566	11/18723	1.23677e-05	0.00079663	0.000632005	7013/6950/7203/22948/10575/10694/10574/10576/1736	9
SK-Mel-5	GO:0042440	pigment metabolic process	33/3566	84/18723	1.27882e-05	0.000815316	0.00064683	7306/538/1638/4948/10891/4435/6490/51151/4935/7220/5498/1244/1497/9839/7299/1652/210/56898/706/3145/2618/596/113235/5471/10606/8833/3251/353/5631/1371/100/402055/7474	33
SK-Mel-5	GO:0021675	nerve development	31/3566	77/18723	1.29873e-05	0.000819645	0.000650264	23213/55959/9935/7020/89797/3213/2737/9860/1515/10939/1499/3200/6152/200933/1605/26018/2131/3198/84189/6495/51804/5205/5270/6405/1959/6299/6507/10371/2558/3676/3280	31
SK-Mel-5	GO:0021537	telencephalon development	75/3566	248/18723	1.3433e-05	0.000835467	0.000662817	6387/63827/6331/3398/6092/166614/266727/4967/79633/9638/65078/6867/5802/5629/114327/83696/8648/8482/79969/79048/2737/10718/23334/23135/79600/2145/2044/57688/583/5455/84687/2258/23236/1499/81853/2648/8891/493/2618/200933/22903/317762/51377/22809/2131/10579/9353/597/471/6513/6546/3251/84879/4830/57178/238/153090/8851/1021/85458/7804/7474/1000/6299/306/10371/55970/10501/1745/26468/9289/51176/5454/32…	75
SK-Mel-5	GO:0001558	regulation of cell growth	114/3566	414/18723	1.35055e-05	0.000835467	0.000662817	6387/3479/57556/348/3490/10512/4137/6696/659/7042/23105/1410/65078/393/3373/1031/1954/23677/84162/6792/400410/53335/147906/80031/5802/29948/8482/5465/4323/84861/2064/22902/2185/5607/6548/65981/10439/10718/7157/3897/6595/84687/2258/604/6868/51094/3621/1981/51760/734/221927/2023/79960/9792/2273/10276/4869/1956/596/1457/1027/5393/23136/2045/84259/114804/9353/2539/1839/85004/23404/6197/8692/9723/5584…	114
SK-Mel-5	GO:0050768	negative regulation of neurogenesis	48/3566	140/18723	1.38138e-05	0.000846165	0.000671304	57556/10512/6696/10683/23105/22933/65078/393/66008/80031/5764/5802/1949/8482/22902/567/7157/706/64689/2258/1499/1495/4038/657/283659/2045/9723/11221/10507/10505/8851/23500/9423/54910/7474/6653/6405/11023/223117/10371/3397/655/10501/1745/4133/3569/3280/1746	48
SK-Mel-5	GO:0051972	regulation of telomerase activity	22/3566	47/18723	1.39672e-05	0.000847256	0.000672169	8658/5570/10715/10039/7157/79618/8550/1499/5073/7013/6950/3320/92345/3181/10575/54984/3326/10576/6714/1736/4609/9314	22
SK-Mel-5	GO:0048066	developmental pigmentation	21/3566	44/18723	1.50196e-05	0.000894677	0.000709791	7306/3815/1638/4948/4435/5873/51151/4935/23682/1910/10981/9839/4286/7299/388552/2737/55686/596/4254/4208/5167	21
SK-Mel-5	GO:0014032	neural crest cell development	32/3566	81/18723	1.50354e-05	0.000894677	0.000709791	57556/10512/6662/1910/6591/80031/8482/3911/83989/5308/657/6949/84541/9723/182/4254/55698/90/10507/10505/9221/54910/6405/2668/1000/223117/10371/9464/655/10501/3280/30812	32
SK-Mel-5	GO:0070198	protein localization to chromosome, telomeric region	16/3566	29/18723	1.55422e-05	0.000916004	0.000726711	8658/1200/7013/6950/7203/54552/22948/10575/54984/10694/10574/10576/1736/79035/26354/7015	16
SK-Mel-5	GO:0045926	negative regulation of growth	75/3566	249/18723	1.5687e-05	0.000916004	0.000726711	57556/10512/6696/659/7042/23105/1410/65078/393/3373/51147/1031/23677/400410/53335/147906/80031/5802/29948/8482/5465/4211/65981/7157/7048/6595/583/84687/2258/604/87178/51094/3621/734/2023/79960/9792/2273/4502/596/1027/2045/3776/9353/2539/85004/5727/8692/9723/407975/55840/11221/10507/5167/10505/8835/1026/8851/5270/9423/4088/54910/7474/6405/6422/223117/23286/131566/6586/10371/7490/10501/4133/58189/9…	75
SK-Mel-5	GO:0009259	ribonucleotide metabolic process	107/3566	385/18723	1.59792e-05	0.000924429	0.000733394	80201/3479/8034/221264/10891/26137/4967/108/10157/3157/32/260425/230/5144/137964/4597/80221/111/5165/65018/3155/283927/203/57678/54963/112/9605/84532/55753/83549/957/23433/38/5465/5160/9414/9200/131870/84836/5208/8382/5213/10846/55902/4598/5236/23181/1738/5164/10005/25874/5230/2182/3614/2023/83440/2597/5163/3615/2618/5198/134526/7378/5901/107/5563/4833/51144/7372/4882/205/51166/5141/5471/84649/10…	107
SK-Mel-5	GO:0048841	regulation of axon extension involved in axon guidance	17/3566	32/18723	1.64599e-05	0.000933917	0.000740921	6387/57556/10512/659/1954/80031/8482/9723/10507/10505/7422/54910/7474/6405/223117/10371/10501	17
SK-Mel-5	GO:0010977	negative regulation of neuron projection development	47/3566	137/18723	1.65917e-05	0.000933917	0.000740921	57556/348/10512/6696/23105/65078/393/26052/66008/9139/112/53335/5376/80031/5802/1949/8482/29116/22902/9860/3956/567/1522/2258/5793/4038/3066/7431/1809/2045/349667/9723/2288/10507/10505/22891/8851/9423/54910/7474/6405/223117/10371/10501/4133/1902/22876	47
SK-Mel-5	GO:0030879	mammary gland development	47/3566	137/18723	1.65917e-05	0.000933917	0.000740921	538/3398/2099/6662/137964/2263/8660/3717/8648/9612/2737/10718/6926/7048/823/128239/6778/7372/7043/81606/5471/6714/5727/3673/2247/2876/1723/7039/4830/8835/353/3219/6909/8792/7422/9423/7474/4041/1950/80139/595/5618/1051/1969/3099/51176/7421	47
SK-Mel-5	GO:0050771	negative regulation of axonogenesis	27/3566	64/18723	1.6905e-05	0.000943057	0.000748173	57556/10512/6696/23105/65078/393/66008/80031/5802/1949/8482/22902/2258/4038/2045/9723/10507/10505/8851/9423/54910/7474/6405/223117/10371/10501/4133	27
SK-Mel-5	GO:0051961	negative regulation of nervous system development	49/3566	145/18723	1.75829e-05	0.000972193	0.000771288	57556/10512/6092/6696/10683/23105/22933/65078/393/66008/80031/5764/5802/1949/8482/22902/567/7157/706/64689/2258/1499/1495/4038/657/283659/2045/9723/11221/10507/10505/8851/23500/9423/54910/7474/6653/6405/11023/223117/10371/3397/655/10501/1745/4133/3569/3280/1746	49
SK-Mel-5	GO:0071498	cellular response to fluid shear stress	13/3566	21/18723	1.85013e-05	0.001014	0.000804454	9788/3037/2185/5607/5598/5339/4780/6714/4208/10365/9314/7980/5743	13
SK-Mel-5	GO:0070200	establishment of protein localization to telomere	11/3566	16/18723	1.98866e-05	0.00107979	0.000856651	7013/6950/7203/22948/10575/10694/10574/10576/1736/79035/7015	11
SK-Mel-5	GO:0042063	gliogenesis	87/3566	301/18723	2.00473e-05	0.00107979	0.000856651	443/8506/5354/3398/4137/128853/7042/6659/28999/3913/2896/6662/5453/22933/3766/1031/11076/79885/5764/10397/4323/2064/2185/83933/2737/745/9580/1267/10319/55553/706/3908/5339/25825/1499/2068/3074/27339/8891/3066/1956/7431/1605/4919/10419/1191/2247/8892/1840/11221/57211/4067/57178/153090/22891/8851/1021/23500/79628/7804/27242/5270/5028/85414/6285/1000/1959/1464/7133/6376/4036/9331/1745/3569/10675/928…	87
SK-Mel-5	GO:0042060	wound healing	115/3566	422/18723	2.05522e-05	0.00109752	0.00087072	3479/348/18/6850/11093/7042/2621/5873/2113/6609/114897/5581/6812/3705/83478/8324/2263/5592/3315/6385/3717/302/960/11234/5465/8526/2064/388552/2737/308/4638/7048/9162/5864/5547/5339/2768/5912/1832/6868/2149/3688/7410/199731/7035/3678/8527/1956/60681/7301/23173/1605/7006/94121/4780/7043/2131/5580/1192/1839/3998/7128/6714/100506658/3673/5359/2247/6678/22875/2876/4217/2683/4067/2004/7039/1026/7046/70…	115
SK-Mel-5	GO:0042149	cellular response to glucose starvation	22/3566	48/18723	2.11667e-05	0.00112076	0.000889151	167359/143686/22863/55846/2309/7157/23334/9024/3178/8678/440/7378/5563/26608/596/4780/3428/84446/6513/10514/5366/9891	22
SK-Mel-5	GO:0009410	response to xenobiotic stimulus	124/3566	462/18723	2.15081e-05	0.00112603	0.000893332	2330/10512/18/999/57491/10891/7423/7042/2621/6609/3157/2052/32/54498/5498/1244/56603/7077/2309/63826/10715/5764/21/5797/670/8648/6648/9400/2329/2185/388552/5608/210/3956/567/389903/7048/706/1857/30/2941/10257/84687/2768/4176/9647/7037/6868/3329/7013/80777/8678/8438/5111/3066/5198/2353/2627/347/107/1956/5563/2822/7372/596/1027/205/4780/3675/5141/5471/3939/3746/2730/3326/6714/1728/5727/3673/5621/15…	124
SK-Mel-5	GO:0042542	response to hydrogen peroxide	49/3566	146/18723	2.16266e-05	0.00112603	0.000893332	2113/1410/4233/2021/65018/55139/2309/10013/6648/2185/23135/140885/10494/2281/5598/6778/3329/10280/8678/5831/8013/5111/3066/10276/10131/596/4780/5074/5580/3939/388/1843/8754/7128/6714/1728/6546/2861/2876/4217/100/3725/8877/10365/6382/9314/8061/3569/301	49
SK-Mel-5	GO:0030900	forebrain development	105/3566	379/18723	2.20556e-05	0.00113887	0.000903523	6387/547/63827/538/6331/1638/3398/999/54149/6092/10891/2113/166614/266727/4967/5013/79633/5453/9638/65078/6867/2263/5592/5764/5802/5629/114327/83696/8648/8482/79969/79048/85440/2737/10718/567/23334/23135/6926/1267/79600/5308/2145/2044/57688/583/5455/84687/2258/23236/1499/81853/2648/8891/5101/493/2618/200933/22903/317762/51377/657/22809/7301/2131/3337/10579/9353/3746/597/6714/471/6513/6546/3251/22…	105
SK-Mel-5	GO:0031099	regeneration	62/3566	198/18723	2.27762e-05	0.00115754	0.000918335	6387/3479/9315/55959/10404/6696/2621/3913/2896/65078/8324/23175/5764/5802/3717/2737/9860/7048/706/2281/6143/5738/87178/1495/8013/5111/347/5774/1956/5792/596/1027/1605/7006/5471/10419/349667/5727/471/5782/11221/2876/607/1026/6217/7049/3936/9076/83700/306/1374/595/9314/7480/1051/4837/10752/3569/22876/301/5228/3371	62
SK-Mel-5	GO:0006582	melanin metabolic process	14/3566	24/18723	2.27975e-05	0.00115754	0.000918335	7306/538/1638/4948/4435/6490/51151/7220/1497/9839/7299/1652/596/7474	14
SK-Mel-5	GO:0051056	regulation of small GTPase mediated signal transduction	87/3566	302/18723	2.2973e-05	0.00115754	0.000918335	3479/64787/23263/348/7042/84253/26053/4233/57221/65078/393/26030/25959/55160/83478/7077/9649/57514/5909/11337/51306/29/27352/57636/1795/23092/55114/5863/57580/10564/26269/80728/57449/8216/23229/116985/50861/604/89890/2149/3688/253980/117178/7410/199731/10276/3685/1123/9267/84986/10251/10161/3675/55379/94134/221178/9353/6714/10603/1124/4254/26230/26037/23108/9181/154796/153090/57493/10125/128272/4…	87
SK-Mel-5	GO:0061138	morphogenesis of a branching epithelium	58/3566	182/18723	2.3311e-05	0.00116518	0.00092439	23213/10512/4435/2099/4233/25932/6662/2263/10116/5361/5629/4323/3911/2737/10481/6926/7048/2297/3209/1522/1499/57057/2252/596/1605/2131/1282/9353/6714/3239/5727/9723/2247/6495/90/51804/9021/4609/7422/7474/6422/4041/2668/6299/1950/10371/80000/1969/7052/655/7490/3791/51176/30812/7421/10252/10253/3371	58
SK-Mel-5	GO:0033627	cell adhesion mediated by integrin	29/3566	72/18723	2.41968e-05	0.00119985	0.000951901	9358/6850/7042/1307/3695/6591/9270/6868/3688/9780/3678/3685/9404/2131/8754/3673/2200/4067/3693/100/23075/83700/3383/55612/1969/3676/3976/3690/54997	29
SK-Mel-5	GO:0009124	nucleoside monophosphate biosynthetic process	20/3566	42/18723	2.494e-05	0.00122697	0.000973416	54963/83549/3614/3615/2618/5198/7378/7372/5471/10606/8833/471/271/3251/1723/353/5631/5634/7371/100	20
SK-Mel-5	GO:0031669	cellular response to nutrient levels	66/3566	215/18723	2.55883e-05	0.00124903	0.000990917	7942/659/2621/8658/2752/167359/143686/10325/25959/58528/22863/11337/55846/64121/2309/6591/220441/10634/5764/8648/53349/5465/9681/7157/23334/5292/23710/1515/23274/27072/5164/9024/3178/1965/3312/8678/1981/440275/7486/440/7378/5563/26608/596/4780/3428/5166/84446/7071/6513/10514/81929/4217/84879/55630/1026/467/3725/5366/6422/9891/4023/3383/7421/90226/3371	66
SK-Mel-5	GO:0042326	negative regulation of phosphorylation	106/3566	385/18723	2.68401e-05	0.00129715	0.00102909	113791/348/4137/10891/4091/64780/6609/23530/22933/5144/5570/1031/22863/55450/3315/56940/84327/64798/80725/8660/91663/80851/5569/5465/1845/5305/3642/80279/140885/5575/324/808/5170/9270/5339/1756/140775/5794/9647/1855/26973/10614/1981/57732/5347/10527/5062/3843/199731/200734/4869/10251/7532/1027/5580/7023/1843/9353/9052/7128/1050/100506658/90007/8692/409/5621/9770/5468/6546/84063/5787/54206/11221/5…	106
SK-Mel-5	GO:0071900	regulation of protein serine/threonine kinase activity	100/3566	359/18723	2.69894e-05	0.00129715	0.00102909	3815/348/4485/27013/6850/659/6609/901/5570/1031/4296/81617/1856/5629/5569/2064/80279/2185/10961/5607/5608/3619/5575/1857/324/808/902/904/56647/6868/26973/10614/5347/10527/493/54619/8322/56034/3843/55011/1956/896/657/898/10251/990/1022/1027/5580/7023/641/1843/79616/8754/1164/3326/7128/6714/1050/8692/5468/6546/23560/4254/993/7164/2247/11221/5770/4217/4067/7039/2180/1026/153090/6543/8792/8851/57493/…	100
SK-Mel-5	GO:0009168	purine ribonucleoside monophosphate biosynthetic process	12/3566	19/18723	2.95058e-05	0.00140727	0.00111645	3614/3615/2618/5198/5471/10606/8833/471/271/3251/353/100	12
SK-Mel-5	GO:0009896	positive regulation of catabolic process	130/3566	492/18723	3.06907e-05	0.00145269	0.00115249	3479/58476/7942/114881/348/94241/255488/7957/26137/10133/144165/9528/10346/754/23530/5581/9830/6662/22933/83547/10444/143686/55187/9924/2021/65018/23677/11337/400410/23053/2309/9517/220441/10715/8660/10297/27352/957/5465/29116/10140/5305/29978/2185/51099/253943/22849/55737/51160/7879/1797/55070/51136/11236/55743/196513/3667/9604/79888/324/285671/79443/57690/26234/55128/140775/65992/23016/1855/871…	130
SK-Mel-5	GO:0001763	morphogenesis of a branching structure	61/3566	196/18723	3.23565e-05	0.00151226	0.00119975	23213/10512/4435/2099/4233/25932/6662/2263/10116/53335/5361/5629/4323/3911/2737/10481/6926/7048/2297/3209/1522/1499/57057/2252/596/1605/2131/2045/1282/9353/6714/3239/5727/9723/2247/6495/90/51804/9021/4609/7422/7474/6422/4041/2668/6299/1950/10371/80000/1969/7052/655/7490/3791/51176/30812/7421/1746/10252/10253/3371	61
SK-Mel-5	GO:0006753	nucleoside phosphate metabolic process	131/3566	497/18723	3.24333e-05	0.00151226	0.00119975	80201/3479/8034/221264/10891/2272/2766/26137/4967/108/10157/3157/32/260425/230/5144/137964/4597/80221/111/5165/65018/256281/3155/283927/203/57678/54963/112/9605/84532/55753/83549/957/23433/38/5465/93100/5160/9414/9200/131870/84836/5208/23475/1267/84875/8382/5213/64802/10846/55902/4598/5236/23181/200035/1738/55191/5164/10005/25874/5230/2182/3614/2023/83440/2597/5163/3615/2618/5198/134526/7378/5901…	131
SK-Mel-5	GO:0070997	neuron death	100/3566	361/18723	3.43856e-05	0.00159142	0.00126255	6620/5176/112399/340371/348/4137/10891/4435/7042/7020/28996/1113/2896/9481/6812/4296/2021/10457/65018/84280/2309/353116/3717/23621/23321/6648/5465/2185/80823/6548/55737/7157/135112/4835/64802/1718/6733/840/5170/6477/1522/1965/841/1499/3329/10280/2149/1981/4170/5700/8013/2597/842/22800/2353/7301/596/11113/7043/2045/2539/2730/3326/1728/409/5621/1191/4208/27429/2876/6495/4217/51804/8851/1958/219699/…	100
SK-Mel-5	GO:0048701	embryonic cranial skeleton morphogenesis	21/3566	46/18723	3.49489e-05	0.0016056	0.0012738	7020/7289/9775/57728/2263/4323/2737/9742/7048/10265/29985/7043/3198/25902/6495/7046/51804/4088/5156/4325/1746	21
SK-Mel-5	GO:0009117	nucleotide metabolic process	129/3566	489/18723	3.56077e-05	0.00162392	0.00128834	80201/3479/8034/221264/10891/2272/2766/26137/4967/108/10157/3157/32/260425/230/5144/137964/4597/80221/111/5165/65018/3155/283927/203/57678/54963/112/9605/84532/55753/83549/957/23433/38/5465/93100/5160/9414/9200/131870/84836/5208/23475/1267/84875/8382/5213/64802/10846/55902/4598/5236/23181/200035/1738/55191/5164/10005/25874/5230/2182/3614/2023/83440/2597/5163/3615/2618/5198/134526/7378/5901/8623/9…	129
SK-Mel-5	GO:0048588	developmental cell growth	70/3566	234/18723	3.78042e-05	0.0017116	0.0013579	6387/3479/57556/348/10512/4137/6696/659/23105/3913/26053/6662/65078/393/1954/6792/53335/5361/80031/10013/5802/8482/5465/22902/80208/10439/3275/3897/7048/65059/2258/5916/1855/1499/26999/51760/3320/3688/440275/214/2131/2045/114804/9353/2539/3326/9723/51393/10507/10505/8851/343472/7422/9962/9423/54910/51320/8470/7474/6405/223117/8437/4092/6586/10371/10501/4133/23025/3676/4897	70
SK-Mel-5	GO:0042594	response to starvation	61/3566	197/18723	3.82757e-05	0.00172048	0.00136494	7942/10891/659/2621/2752/167359/143686/10325/58528/3155/22863/11337/55846/64121/2309/34/220441/10634/38/53349/5465/9681/7157/23334/23710/1515/23274/27072/9024/3178/1965/3312/662/8678/440275/7486/440/7378/5563/26608/596/4780/3428/5166/84446/7071/6513/10514/81929/4217/84879/1723/55630/1026/1978/467/3725/7538/5366/6422/9891	61
SK-Mel-5	GO:0045936	negative regulation of phosphate metabolic process	118/3566	441/18723	3.8932e-05	0.00173748	0.00137843	113791/348/4137/10891/7042/4091/64780/6609/23530/22933/5144/5570/1031/22863/55450/3315/56940/84327/64798/80725/8660/91663/80851/5569/5465/1845/5305/3642/80279/1408/7157/140885/5575/2281/79888/324/808/5170/9270/5339/1756/140775/84687/5794/9647/1855/26973/51657/10614/1981/57732/5347/10527/5062/3843/199731/200734/4869/10251/7532/1027/57718/5580/7023/1843/9353/2280/9052/7128/1050/100506658/90007/8692…	118
SK-Mel-5	GO:0071453	cellular response to oxygen levels	56/3566	177/18723	4.01097e-05	0.001764	0.00139947	112399/538/10891/2034/28996/5581/50809/22933/5165/2021/65018/8996/2309/64506/5764/10397/9114/84317/537/6548/7157/10449/5230/23545/677/29923/2023/5163/79723/2627/26608/596/205/4780/3776/6714/30001/6546/23576/219736/27087/1978/1958/4609/7422/1263/5366/56776/6422/3654/6285/3383/7015/5743/655/6781	56
SK-Mel-5	GO:0036294	cellular response to decreased oxygen levels	52/3566	161/18723	4.02974e-05	0.001764	0.00139947	112399/538/10891/2034/28996/5581/50809/22933/5165/2021/65018/8996/2309/64506/5764/10397/6548/7157/10449/5230/677/29923/2023/5163/79723/2627/26608/596/205/4780/3776/6714/30001/6546/23576/219736/27087/1978/1958/4609/7422/1263/5366/56776/6422/3654/6285/3383/7015/5743/655/6781	52
SK-Mel-5	GO:0021543	pallium development	54/3566	169/18723	4.03733e-05	0.001764	0.00139947	63827/166614/266727/4967/79633/9638/6867/5802/5629/114327/83696/8648/79969/2737/23135/2145/2044/583/5455/84687/2258/23236/1499/81853/8891/493/2618/200933/22903/317762/10579/9353/597/471/6513/84879/4830/57178/238/153090/8851/1021/85458/7804/1000/306/55970/10501/1745/26468/9289/51176/5454/1746	54
SK-Mel-5	GO:0070202	regulation of establishment of protein localization to chromosome	9/3566	12/18723	4.10429e-05	0.00178081	0.0014128	7013/6950/7203/22948/10575/10694/10574/10576/1736	9
SK-Mel-5	GO:0030318	melanocyte differentiation	14/3566	25/18723	4.27251e-05	0.0018284	0.00145056	7306/3815/4948/4435/5873/1910/9839/4286/2737/55686/596/4254/4208/5167	14
SK-Mel-5	GO:0044550	secondary metabolite biosynthetic process	14/3566	25/18723	4.27251e-05	0.0018284	0.00145056	7306/538/1638/4948/4435/6490/51151/7220/1497/9839/7299/1652/56898/7474	14
SK-Mel-5	GO:0010563	negative regulation of phosphorus metabolic process	118/3566	442/18723	4.33088e-05	0.00184077	0.00146037	113791/348/4137/10891/7042/4091/64780/6609/23530/22933/5144/5570/1031/22863/55450/3315/56940/84327/64798/80725/8660/91663/80851/5569/5465/1845/5305/3642/80279/1408/7157/140885/5575/2281/79888/324/808/5170/9270/5339/1756/140775/84687/5794/9647/1855/26973/51657/10614/1981/57732/5347/10527/5062/3843/199731/200734/4869/10251/7532/1027/57718/5580/7023/1843/9353/2280/9052/7128/1050/100506658/90007/8692…	118
SK-Mel-5	GO:0048863	stem cell differentiation	63/3566	206/18723	4.37448e-05	0.00184674	0.00146511	57556/3815/10512/7042/144165/2099/6662/1910/2263/124540/6591/80031/5764/8482/3911/7157/83989/55553/5308/22823/1499/2068/26147/29081/5717/54888/2627/657/84844/6949/4780/2131/81606/54517/84541/9723/182/4254/4208/55698/2247/90/10507/10505/2823/6909/79918/9221/54910/6405/5156/6422/2668/1000/223117/10371/9464/655/10501/3280/30812/3976/8091	63
SK-Mel-5	GO:0071496	cellular response to external stimulus	90/3566	320/18723	4.51854e-05	0.00189475	0.0015032	7942/659/2621/441027/8658/6662/2752/167359/143686/10325/2805/25959/58528/22863/11337/55846/64121/2309/6591/63895/220441/10634/5764/8648/53349/5465/6548/9681/7157/23334/5292/23710/1515/23274/27072/5164/5339/79792/84687/9024/3178/1965/841/3312/8678/1981/440275/9780/7486/440/7378/2353/1956/5563/26608/596/1605/4780/9531/3428/5166/84446/3673/7071/6513/10514/79077/81929/4217/4067/84879/55630/1026/467/4…	90
SK-Mel-5	GO:0050931	pigment cell differentiation	17/3566	34/18723	4.59741e-05	0.00191497	0.00151924	7306/3815/4948/4435/5873/23682/1910/10981/9839/4286/388552/2737/55686/596/4254/4208/5167	17
SK-Mel-5	GO:0009260	ribonucleotide biosynthetic process	57/3566	182/18723	4.74147e-05	0.0019619	0.00155647	8034/221264/10891/108/32/111/5165/65018/203/54963/112/9605/84532/83549/38/5465/5160/9200/8382/55902/23181/1738/5164/25874/2182/3614/2023/5163/3615/2618/5198/7378/107/4833/51144/7372/4882/205/5471/10606/8833/5166/2181/471/1503/271/3251/11332/9060/1723/4830/353/2180/7371/109/1836/54898	57
SK-Mel-5	GO:0009113	purine nucleobase biosynthetic process	8/3566	10/18723	5.34969e-05	0.00218463	0.00173317	2618/5471/10606/8833/3251/353/5631/100	8
SK-Mel-5	GO:1904851	positive regulation of establishment of protein localization to telomere	8/3566	10/18723	5.34969e-05	0.00218463	0.00173317	6950/7203/22948/10575/10694/10574/10576/1736	8
SK-Mel-5	GO:0006790	sulfur compound metabolic process	94/3566	339/18723	5.58474e-05	0.00225119	0.00178598	6819/64780/4967/3425/6487/10157/3157/10090/32/51380/2678/3373/137964/4597/1244/80221/5165/3155/283927/23382/1497/10768/55256/57678/373156/84532/6821/9645/10560/337876/56922/38/3029/5160/2686/9200/84836/25974/79178/55902/4598/23181/22901/1738/23479/5164/10005/2941/25874/2799/2182/5163/134526/79586/9435/51144/262/10678/51166/4780/2131/84649/10402/2739/1192/2539/2730/5166/4166/92126/2181/191/79690/1…	94
SK-Mel-5	GO:0007568	aging	94/3566	339/18723	5.58474e-05	0.00225119	0.00178598	5549/5176/3398/18/10891/1410/1910/2021/7077/4215/2309/1017/63826/6648/5608/567/7157/4335/6926/1267/1515/7048/706/23515/80317/1738/840/84687/8550/604/1965/87178/26271/2956/1495/10000/8678/2068/8438/842/7486/2067/4869/2353/347/27230/657/596/1027/1605/1284/4780/7043/5074/5580/26156/9516/2730/597/1728/8692/4791/5621/30001/3159/2247/27429/384/4217/29842/57178/6909/1026/4311/1021/7076/9076/9521/100/372…	94
SK-Mel-5	GO:0002064	epithelial cell development	66/3566	220/18723	5.63418e-05	0.00225656	0.00179024	23086/59/2099/3913/2889/4233/25932/6662/5144/118/137964/79955/10116/11078/353116/5802/91663/5629/51057/4643/9414/3642/7111/10481/3175/9863/286262/2317/5170/3209/5339/5916/23236/2195/9497/7431/5991/26084/6714/182/1903/440193/84189/23022/2876/2683/29842/1026/9294/57493/1021/9076/7422/7474/7132/1000/631/6382/2150/5357/3383/1969/57619/1306/30812/6781	66
SK-Mel-5	GO:0007416	synapse assembly	56/3566	179/18723	5.68374e-05	0.00226191	0.00179448	999/6092/266727/56126/56127/5364/56125/26052/56122/56133/23363/5802/56123/10160/80823/55737/57502/57717/2258/119/78999/1855/1981/4038/200933/94030/575/2045/23768/57463/4208/375790/8927/84189/27445/43/6495/10507/2823/51804/347902/139065/57622/9423/7474/84631/91156/1000/55203/10082/2239/5789/55607/3556/23266/4897	56
SK-Mel-5	GO:0007528	neuromuscular junction development	20/3566	44/18723	5.77228e-05	0.00227989	0.00180874	1287/3913/8495/5764/288/2064/6640/10497/10939/55906/1855/2149/4038/8496/1282/375790/6495/51804/23025/3371	20
SK-Mel-5	GO:0031960	response to corticosteroid	53/3566	167/18723	5.80189e-05	0.00227989	0.00180874	5176/3490/84676/3176/2805/1244/10081/2309/21/178/210/2908/1515/808/3329/677/5111/842/6155/2353/1956/596/7023/1843/9353/8754/6714/114907/1977/6678/54206/1026/9076/133522/7538/2354/590/6285/6382/306/595/6586/3383/2690/54541/5743/8061/23462/3569/687/301/1369/6781	53
SK-Mel-5	GO:0001649	osteoblast differentiation	68/3566	229/18723	6.23559e-05	0.00242802	0.00192627	3479/58476/6096/6696/659/4435/4091/6662/57560/10457/1291/54795/2263/6591/8482/10140/537/5608/2737/6238/4488/1499/26271/10189/22800/57003/10492/657/865/26156/1192/3570/3726/5727/1050/2091/115908/182/9770/5468/23560/4208/10514/2247/43/90/10507/9188/1021/2201/4088/6422/4041/25819/51232/7480/25937/1051/1969/9464/655/9902/1462/3569/6615/51176/30812/3371	68
SK-Mel-5	GO:0031346	positive regulation of cell projection organization	97/3566	353/18723	6.25658e-05	0.00242802	0.00192627	6387/64787/5176/5274/3815/348/538/4137/6092/659/23580/10154/26053/2889/23373/2896/9638/26039/5526/1954/5364/26052/9139/6792/5361/23363/1856/5764/22906/23433/8482/5756/22902/2185/80823/65981/5365/139818/5064/3897/57498/10494/8724/55704/1857/2281/9863/56965/324/116985/1855/51657/2648/8322/10300/5362/54606/5216/4780/7043/3675/4919/1809/9353/950/6714/100506658/57463/3673/375790/26230/23613/51393/1050…	97
SK-Mel-5	GO:0009167	purine ribonucleoside monophosphate metabolic process	19/3566	41/18723	6.35075e-05	0.00244935	0.00194319	221264/260425/203/9414/3614/3615/2618/5198/205/5471/10606/8833/471/271/3251/353/4860/100/4907	19
SK-Mel-5	GO:1900180	regulation of protein localization to nucleus	45/3566	136/18723	6.77031e-05	0.00259472	0.00205852	999/166614/2752/3728/3717/5569/55929/56957/80279/2737/57506/7037/151636/1495/6950/5347/3843/7203/4869/5901/347/22948/10575/9531/54984/10694/5580/10574/3326/10576/6714/8692/7545/1736/83666/705/9221/4088/83593/25937/7015/55612/5743/948/3976	45
SK-Mel-5	GO:1901214	regulation of neuron death	89/3566	319/18723	6.8269e-05	0.00259472	0.00205852	6620/5176/112399/340371/348/4137/10891/4435/7042/7020/28996/1113/2896/6812/4296/10457/65018/84280/2309/353116/3717/23621/23321/6648/5465/2185/80823/55737/7157/135112/4835/64802/1718/6733/5170/1522/1965/841/1499/3329/10280/2149/1981/4170/5700/8013/842/22800/2353/7301/596/7043/2045/2539/2730/3326/1728/409/5621/1191/4208/27429/6495/4217/51804/8851/1958/219699/9962/116986/3725/7474/6653/54434/2668/71…	89
SK-Mel-5	GO:1990138	neuron projection extension	54/3566	172/18723	6.87555e-05	0.00259472	0.00205852	6387/57556/348/10512/4137/659/3913/26053/65078/393/1954/6792/53335/5361/80031/5802/8482/22902/80208/10439/3897/65059/1855/1499/26999/51760/3320/3688/440275/214/114804/9353/3326/9723/51393/10507/10505/8851/343472/7422/9962/9423/54910/7474/6405/223117/8437/6586/10371/10501/4133/23025/3676/4897	54
SK-Mel-5	GO:0048713	regulation of oligodendrocyte differentiation	18/3566	38/18723	6.89379e-05	0.00259472	0.00205852	443/128853/5764/1499/3066/1605/10419/11221/22891/23500/27242/85414/7133/1745/5803/3280/1746/10215	18
SK-Mel-5	GO:0042438	melanin biosynthetic process	13/3566	23/18723	7.08661e-05	0.00263844	0.0020932	7306/538/1638/4948/4435/6490/51151/7220/1497/9839/7299/1652/7474	13
SK-Mel-5	GO:0000079	regulation of cyclin-dependent protein serine/threonine kinase activity	34/3566	94/18723	7.09438e-05	0.00263844	0.0020932	27013/901/1031/5629/80279/324/902/904/56647/6868/10614/5347/10527/54619/3843/1956/896/898/990/1022/1027/7023/641/79616/1164/7128/6714/1050/23560/993/1026/8851/595/1028	34
SK-Mel-5	GO:0031589	cell-substrate adhesion	99/3566	363/18723	7.24208e-05	0.00267743	0.00212413	9358/3037/11093/2621/1307/4091/56477/3913/7059/5581/10580/3728/8861/8324/7402/3695/22998/2241/56940/6385/11078/54822/80725/5764/3717/91663/55742/51057/960/4323/3911/1845/2185/6548/3956/3897/51754/10319/57580/3175/9341/79834/5170/7205/9270/59339/604/9647/1499/3688/8322/3678/3685/9404/347/51144/7301/596/1605/2633/3675/708/3915/8754/6714/3673/80005/9723/182/55698/5829/3693/50509/285613/1021/10420/10…	99
SK-Mel-5	GO:0009150	purine ribonucleotide metabolic process	100/3566	368/18723	7.76959e-05	0.00285555	0.00226545	80201/3479/8034/221264/10891/26137/4967/108/10157/3157/32/260425/230/5144/137964/4597/80221/111/5165/65018/3155/283927/203/57678/112/9605/84532/55753/957/23433/38/5465/5160/9414/9200/131870/84836/5208/8382/5213/10846/55902/4598/5236/23181/1738/5164/10005/25874/5230/2182/3614/2023/83440/2597/5163/3615/2618/5198/134526/5901/107/5563/4833/51144/4882/205/51166/5141/5471/84649/10606/3939/8833/5166/218…	100
SK-Mel-5	GO:0061448	connective tissue development	73/3566	252/18723	8.27634e-05	0.00302401	0.00239909	23213/4094/538/59/55959/10891/659/9149/1302/57326/7059/6662/3373/7067/57560/871/54795/2121/6591/9517/3213/960/38/2737/649/7048/55553/2297/91252/65992/1893/5916/1499/3200/2648/864/4060/656/84159/657/2822/91461/2131/84649/3570/8692/4208/2247/23516/8372/7046/285590/7076/1958/22856/4088/51320/7474/6653/4041/4092/7480/2690/9464/655/7490/6615/30812/1833/1746/7045/8091/6781	73
SK-Mel-5	GO:0001837	epithelial to mesenchymal transition	50/3566	157/18723	8.39061e-05	0.00304794	0.00241808	3037/7042/6662/2263/6591/147906/8320/10439/6926/7048/10521/1499/51094/3066/57057/200734/3182/6949/1605/7043/81610/84541/182/6934/90/55223/7046/7049/153090/161742/9221/84172/4088/7474/6422/80709/4092/80139/55273/25937/753/655/23462/3569/6615/51176/10252/10253/8091/84695	50
SK-Mel-5	GO:0016055	Wnt signaling pathway	117/3566	444/18723	8.45555e-05	0.00305377	0.00242271	23213/1501/348/55959/57658/219287/4435/9679/25960/6659/51421/144165/28999/57447/57326/4163/8658/6662/129293/3728/26959/8861/25776/57560/79412/7088/27303/8324/27123/51473/54795/2263/2309/9839/6591/84327/147906/4286/1856/10297/83439/7089/10927/81847/65981/2737/55737/9580/8724/1857/9863/324/337867/5916/1855/51444/1499/84100/79960/4038/8322/151195/83786/8312/1956/5563/898/7091/1457/10856/64840/3675/2…	117
SK-Mel-5	GO:0030850	prostate gland development	20/3566	45/18723	8.54e-05	0.00306655	0.00243284	5176/23213/2099/6662/2263/10116/2737/10481/3209/5916/1499/1027/3239/5727/55840/7474/6422/655/301/3371	20
SK-Mel-5	GO:0007179	transforming growth factor beta receptor signaling pathway	60/3566	198/18723	8.75967e-05	0.00312745	0.00248116	3248/9315/79674/128853/4435/7042/4091/28996/4093/2805/858/9839/56940/64081/5465/7157/7048/3175/5170/6868/200734/9404/2353/657/81031/7043/3675/2280/8754/5654/3326/6714/409/407975/5468/5829/90/2200/5045/3693/57178/7046/7049/161742/2201/3725/4088/23089/4092/80139/135228/3397/55612/753/1028/375387/9518/10252/10253/7057	60
SK-Mel-5	GO:0031331	positive regulation of cellular catabolic process	113/3566	427/18723	9.19426e-05	0.00326396	0.00258946	3479/58476/7942/114881/348/94241/255488/7957/26137/10133/144165/9528/10346/754/23530/9830/22933/10444/143686/55187/9924/2021/65018/23677/11337/400410/23053/2309/9517/220441/10715/8660/957/5465/10140/5305/29978/2185/51099/253943/22849/55737/1797/55070/51136/11236/55743/196513/3667/9604/285671/79443/57690/26234/55128/140775/65992/23016/1855/87178/10134/677/5706/5073/151636/22926/8678/5702/3320/5700…	113
SK-Mel-5	GO:0042274	ribosomal small subunit biogenesis	28/3566	73/18723	9.31675e-05	0.00328876	0.00260913	6230/6193/2068/3921/57647/83732/11157/4809/4869/23212/27341/6201/6218/6208/55127/55720/84946/5822/91695/9277/10436/10171/25879/79954/28987/705/6217/10885	28
SK-Mel-5	GO:0031103	axon regeneration	22/3566	52/18723	9.50695e-05	0.00333705	0.00264744	9315/6696/3913/2896/65078/5764/5802/3717/9860/706/2281/1495/347/5792/596/1605/349667/83700/9314/10752/22876/3371	22
SK-Mel-5	GO:0007584	response to nutrient	54/3566	174/18723	9.6778e-05	0.00337804	0.00267996	2696/9227/6696/2621/56477/3157/23530/8658/25959/56603/717/3155/6591/5764/7299/8648/6648/178/210/5292/7048/706/1327/2281/5164/8520/2182/8678/2067/1956/7274/3939/2730/1728/2181/191/3673/5468/6546/6678/2180/100/19/590/6422/595/4023/5743/8942/655/7421/1543/3371/6781	54
SK-Mel-5	GO:0006085	acetyl-CoA biosynthetic process	11/3566	18/18723	9.91657e-05	0.00342313	0.00271574	5165/84532/38/5160/55902/23181/1738/5164/25874/5163/5166	11
SK-Mel-5	GO:0046112	nucleobase biosynthetic process	11/3566	18/18723	9.91657e-05	0.00342313	0.00271574	2618/7372/5471/10606/8833/1503/3251/1723/353/5631/100	11
SK-Mel-5	GO:0072006	nephron development	46/3566	142/18723	0.000100624	0.0034544	0.00274055	23213/59/55959/9788/4435/28999/3913/6662/26249/8842/38/4643/3911/2737/4358/9863/2297/5455/1499/596/79191/3675/2131/3570/5727/182/4208/2247/6495/55083/51804/1958/4609/7422/5156/2668/51196/6299/80000/25937/655/7490/3280/30812/65266/3976	46
SK-Mel-5	GO:0198738	cell-cell signaling by wnt	117/3566	446/18723	0.000103428	0.00353123	0.0028015	23213/1501/348/55959/57658/219287/4435/9679/25960/6659/51421/144165/28999/57447/57326/4163/8658/6662/129293/3728/26959/8861/25776/57560/79412/7088/27303/8324/27123/51473/54795/2263/2309/9839/6591/84327/147906/4286/1856/10297/83439/7089/10927/81847/65981/2737/55737/9580/8724/1857/9863/324/337867/5916/1855/51444/1499/84100/79960/4038/8322/151195/83786/8312/1956/5563/898/7091/1457/10856/64840/3675/2…	117
SK-Mel-5	GO:0097193	intrinsic apoptotic signaling pathway	81/3566	288/18723	0.000105653	0.00358762	0.00284623	6387/27113/2272/28996/754/84216/487/65018/8996/3315/6591/133746/57600/3717/29965/960/6648/10961/2537/7157/10625/8382/10494/9641/5598/5164/6477/90441/9647/9024/138151/10134/2956/51657/8678/8451/2023/4170/602/5163/10962/842/6201/10131/596/4780/3428/5580/1984/597/220042/64065/6714/26155/30001/1191/3708/64112/10514/8531/27429/2876/5770/4217/64782/23645/1026/9181/153090/79094/5366/7132/79156/7133/5776…	81
SK-Mel-5	GO:0009165	nucleotide biosynthetic process	73/3566	254/18723	0.000108796	0.00367435	0.00291504	8034/221264/10891/108/32/111/5165/65018/203/54963/112/9605/84532/83549/38/5465/93100/5160/9200/23475/84875/8382/64802/55902/23181/1738/55191/5164/25874/2182/3614/2023/5163/3615/2618/5198/7378/9519/107/4833/51144/7372/4882/4199/205/5471/10606/8833/5166/2181/129607/471/1503/271/3251/11332/83666/9060/1723/4830/353/2180/5631/5634/7371/4860/100/109/8942/1836/4843/4837/54898	73
SK-Mel-5	GO:0006637	acyl-CoA metabolic process	34/3566	96/18723	0.000114734	0.00381607	0.00302747	4967/10157/3157/32/137964/4597/80221/5165/3155/283927/57678/84532/38/5160/9200/55902/4598/23181/1738/5164/10005/25874/2182/5163/134526/51144/51166/84649/5166/2181/11332/2180/8942/54898	34
SK-Mel-5	GO:0035383	thioester metabolic process	34/3566	96/18723	0.000114734	0.00381607	0.00302747	4967/10157/3157/32/137964/4597/80221/5165/3155/283927/57678/84532/38/5160/9200/55902/4598/23181/1738/5164/10005/25874/2182/5163/134526/51144/51166/84649/5166/2181/11332/2180/8942/54898	34
SK-Mel-5	GO:0045444	fat cell differentiation	67/3566	229/18723	0.000114824	0.00381607	0.00302747	3398/28971/4329/10891/9935/4091/6041/22933/27241/25776/122953/283927/3638/284207/54795/10013/79969/6272/83862/80339/5292/9580/2874/25999/583/23236/677/8013/144404/84159/22809/64318/1050/182/5468/30001/10603/6934/11221/2876/6495/5167/338761/7538/4088/51320/7474/5156/6422/4041/1959/3164/25819/57761/4929/595/9314/4023/7480/25937/1051/5743/655/3569/3280/30812/8091	67
SK-Mel-5	GO:0072521	purine-containing compound metabolic process	110/3566	416/18723	0.000117125	0.00386554	0.00306672	80201/3479/8034/221264/10891/2272/2766/26137/4967/140733/108/10157/3157/32/260425/230/5144/137964/4597/80221/111/5165/65018/3155/283927/203/57678/112/9605/84532/55753/957/23433/38/5465/5160/9414/9200/131870/84836/5208/8382/5213/10846/55902/4598/5236/23181/28992/1738/5164/10005/25874/5230/2182/3614/2023/83440/2597/5163/3615/2618/5198/134526/5901/107/5563/4833/51144/262/4882/205/51166/5141/5471/846…	110
SK-Mel-5	GO:0009127	purine nucleoside monophosphate biosynthetic process	12/3566	21/18723	0.00011755	0.00386554	0.00306672	3614/3615/2618/5198/5471/10606/8833/471/271/3251/353/100	12
SK-Mel-5	GO:0060537	muscle tissue development	107/3566	403/18723	0.000121302	0.00396804	0.00314804	3479/10324/6331/10512/3398/10891/7042/6444/3131/84466/6662/22933/91807/25776/80206/56603/8324/858/4703/2263/34/23363/5629/5465/7763/4211/6548/4488/5292/4638/23135/6926/7048/55553/2317/5339/10521/1756/57486/1832/1499/2648/3688/1829/57057/56983/2353/2627/10052/657/596/79191/3344/3776/2280/2539/1827/5727/51676/409/4061/407975/10848/6546/3276/4208/2247/8531/2876/3142/6495/607/90/115509/9242/6909/7046…	107
SK-Mel-5	GO:0003148	outflow tract septum morphogenesis	13/3566	24/18723	0.000127674	0.00415474	0.00329616	10512/6092/659/7042/4091/2263/55742/7048/57057/2627/657/6909/4036	13
SK-Mel-5	GO:0032868	response to insulin	75/3566	264/18723	0.000132236	0.00428089	0.00339624	27019/4435/2549/8503/28999/29988/10580/64900/143686/2805/4644/54832/3638/858/6844/23175/2241/84327/64397/8660/64506/1407/23433/9852/5465/6272/5305/1408/6548/80339/1176/5579/3667/5164/324/5170/27131/51094/677/896/2822/7532/3480/5471/5580/55971/5166/6714/5468/6513/10603/54206/23516/5770/5167/4067/2888/11031/353/9021/1958/9734/3795/6653/376497/1959/57761/9882/4023/2650/3383/2690/130399/634/7425	75
SK-Mel-5	GO:0048640	negative regulation of developmental growth	38/3566	112/18723	0.000133693	0.00430573	0.00341594	57556/10512/6696/23105/65078/393/53335/80031/5802/8482/5465/4211/7048/583/2258/1027/2045/3776/2539/5727/9723/407975/11221/10507/10505/8835/1026/8851/9423/54910/7474/6405/223117/23286/10371/10501/4133/9518	38
SK-Mel-5	GO:0007219	Notch signaling pathway	53/3566	172/18723	0.000136988	0.00438925	0.0034822	23555/3815/27255/11156/6092/7042/10683/142678/6662/26160/2805/9139/8788/6591/4323/196403/7048/3175/51107/9270/604/6868/113878/151636/84934/56983/26032/1027/23509/3993/3955/64065/6714/1050/182/81619/1903/1840/54475/57178/6909/4854/84441/79094/8470/55273/655/55534/1745/23462/6615/3280/1746	53
SK-Mel-5	GO:0060562	epithelial tube morphogenesis	89/3566	325/18723	0.000139868	0.00443471	0.00351827	9788/4435/7042/6659/144165/129880/2099/4233/25932/6662/7289/26249/26160/1954/83852/2263/6385/1856/9645/5629/4323/3911/2737/6926/7048/79600/1857/2297/1522/11146/5916/1855/1499/27086/2648/57057/6201/596/5216/1605/79191/2131/2045/388/1282/9353/7408/6714/5727/25902/51676/115908/9723/4208/2247/6495/219736/90/55083/6909/51804/3687/4609/7422/9423/4088/54910/7474/6422/4041/2668/6299/1950/80000/4036/1969/…	89
SK-Mel-5	GO:0006509	membrane protein ectodomain proteolysis	19/3566	43/18723	0.000140536	0.00443471	0.00351827	348/7077/56928/23621/9860/51107/25825/6868/5774/2822/29763/1605/8754/5045/7076/7133/51429/7078/8728	19
SK-Mel-5	GO:0030517	negative regulation of axon extension	19/3566	43/18723	0.000140536	0.00443471	0.00351827	57556/10512/65078/393/80031/5802/8482/9723/10507/10505/8851/9423/54910/7474/6405/223117/10371/10501/4133	19
SK-Mel-5	GO:1901293	nucleoside phosphate biosynthetic process	73/3566	256/18723	0.000142131	0.00446247	0.0035403	8034/221264/10891/108/32/111/5165/65018/203/54963/112/9605/84532/83549/38/5465/93100/5160/9200/23475/84875/8382/64802/55902/23181/1738/55191/5164/25874/2182/3614/2023/5163/3615/2618/5198/7378/9519/107/4833/51144/7372/4882/4199/205/5471/10606/8833/5166/2181/129607/471/1503/271/3251/11332/83666/9060/1723/4830/353/2180/5631/5634/7371/4860/100/109/8942/1836/4843/4837/54898	73
SK-Mel-5	GO:0018212	peptidyl-tyrosine modification	101/3566	378/18723	0.000143625	0.00448685	0.00355964	695/3479/3815/6850/2621/3702/28996/9149/4233/5581/5526/1195/2263/2241/56940/80725/1856/3717/80851/960/8764/57396/1795/2064/2185/5607/5608/7157/4750/8798/2044/79834/9625/5912/6868/57732/4038/56034/3066/5062/199731/3678/1956/2252/7301/7006/91461/3480/4919/5580/2045/1839/3570/9052/6714/8692/4145/409/5621/4254/83666/8460/54206/8459/3592/90/5770/10507/4067/7039/238/9181/10420/9021/4739/7422/7804/1946/…	101
SK-Mel-5	GO:0006163	purine nucleotide metabolic process	105/3566	396/18723	0.000147622	0.00458878	0.0036405	80201/3479/8034/221264/10891/2272/2766/26137/4967/108/10157/3157/32/260425/230/5144/137964/4597/80221/111/5165/65018/3155/283927/203/57678/112/9605/84532/55753/957/23433/38/5465/5160/9414/9200/131870/84836/5208/8382/5213/10846/55902/4598/5236/23181/1738/5164/10005/25874/5230/2182/3614/2023/83440/2597/5163/3615/2618/5198/134526/5901/107/5563/4833/51144/4882/205/51166/5141/5471/84649/10606/3939/883…	105
SK-Mel-5	GO:0007369	gastrulation	56/3566	185/18723	0.000152525	0.0047177	0.00374278	659/1294/8861/1954/8324/1291/3909/2263/1856/91663/8320/4323/5607/7157/23135/10139/4155/7048/5598/1738/1855/1499/3688/8013/57057/56983/3678/3685/2627/657/1605/1284/3675/2131/1843/3673/90/3693/85474/154796/4088/7474/6422/4041/1847/4317/9314/4324/1969/655/6615/51176/3676/3690/8091/1846	56
SK-Mel-5	GO:0050673	epithelial cell proliferation	114/3566	437/18723	0.000160387	0.0049252	0.0039074	6387/3479/5176/23213/3815/348/538/6331/3398/55959/9788/659/3037/7423/7042/2099/2896/4163/6662/2752/3373/26160/1910/57560/8324/84280/858/5909/2263/6591/5764/5629/79400/5797/4323/64743/2064/5607/5365/1992/567/128239/5170/9270/6778/1893/6868/1499/677/10000/864/8013/1956/657/2252/1027/3915/1960/5654/7128/5727/5468/4208/6934/2247/6678/54206/55840/3592/11221/2876/6495/219736/2683/7039/4830/7857/7046/70…	114
SK-Mel-5	GO:0010631	epithelial cell migration	96/3566	357/18723	0.000161548	0.0049252	0.0039074	5176/3815/348/11156/11167/51466/659/3037/25960/7042/2113/8503/2896/4233/4163/5581/6662/2752/3728/3373/25959/4215/3315/9839/10013/5764/5629/51057/5797/2185/5607/3964/7048/57449/5547/5170/9270/5793/9647/6868/27086/51094/10000/3688/493/116150/9404/57381/2252/2822/5216/4780/3675/575/388/1960/9353/8754/1839/6714/3673/80005/5468/4208/2247/6678/5829/11221/2876/7857/7046/154796/153090/161742/7422/9734/74…	96
SK-Mel-5	GO:0006188	IMP biosynthetic process	8/3566	11/18723	0.000163175	0.0049252	0.0039074	2618/5198/5471/10606/471/271/3251/353	8
SK-Mel-5	GO:1904869	regulation of protein localization to Cajal body	8/3566	11/18723	0.000163175	0.0049252	0.0039074	6950/7203/22948/10575/10694/10574/10576/1736	8
SK-Mel-5	GO:1904871	positive regulation of protein localization to Cajal body	8/3566	11/18723	0.000163175	0.0049252	0.0039074	6950/7203/22948/10575/10694/10574/10576/1736	8
SK-Mel-5	GO:1901654	response to ketone	58/3566	194/18723	0.000170187	0.00510499	0.00405003	5176/3490/6696/7042/2621/108/5581/1244/111/8031/112/2309/5764/8648/10481/2908/5723/10499/706/808/10062/84687/5111/842/6155/2353/4678/107/1956/5563/7043/7023/1843/9353/6714/3239/1728/114907/1977/54206/4830/1026/7049/9076/109/10365/2354/6422/595/9314/6586/196/3383/54541/8061/687/7057/3371	58
SK-Mel-5	GO:0003206	cardiac chamber morphogenesis	40/3566	121/18723	0.000170765	0.00510499	0.00405003	10512/6092/659/7042/4091/6659/2263/55742/5629/7157/6926/7048/1832/57057/2627/657/9353/2280/4061/182/407975/10848/4208/57211/90/6909/7046/7049/57493/9510/5318/7474/4092/6586/53834/4036/9464/655/23462/3280	40
SK-Mel-5	GO:0018210	peptidyl-threonine modification	41/3566	125/18723	0.000172749	0.0051397	0.00407758	2591/28996/9149/8658/22933/1195/65267/7048/8798/5579/8476/808/5170/1981/85456/2589/5347/199731/200734/8312/285203/596/1457/11113/5580/219736/90/7046/9294/8851/161742/8877/7474/114805/4092/1950/8444/54541/8445/655/10253	41
SK-Mel-5	GO:1904358	positive regulation of telomere maintenance via telomere lengthening	17/3566	37/18723	0.00017485	0.00517756	0.00410761	8658/5570/79618/8550/3178/1499/5073/6950/92345/7203/3181/22948/10575/10694/10574/10576/1736	17
SK-Mel-5	GO:0070301	cellular response to hydrogen peroxide	34/3566	98/18723	0.000181476	0.00534753	0.00424246	2113/4233/2021/65018/55139/2309/10013/23135/140885/10494/5598/6778/10280/8678/5831/8013/5111/3066/10276/10131/4780/5074/5580/388/7128/6714/1728/2861/4217/8877/10365/9314/3569/301	34
SK-Mel-5	GO:0034113	heterotypic cell-cell adhesion	24/3566	61/18723	0.000182735	0.00534753	0.00424246	3728/3695/91663/55742/960/5607/140885/4155/5598/1832/3688/1829/3678/3685/64065/965/3687/83700/5318/9314/655/4345/3676/3690	24
SK-Mel-5	GO:0001701	in utero embryonic development	98/3566	367/18723	0.000183158	0.00534753	0.00424246	3479/7942/538/2034/4435/25809/9644/201895/320/2021/149473/57728/2263/8320/8648/4643/7763/56957/55224/9915/2737/7157/5723/6926/57498/7048/79600/4695/728661/3633/50861/841/1499/51639/677/689/2068/8451/29985/2648/3688/5890/86/8894/54888/27341/55172/2627/4678/657/60681/54663/123920/10161/53918/57718/7043/285855/4863/3726/5727/1050/4061/3276/10436/8531/54475/90/5045/705/57178/7046/154796/26115/57493/9…	98
SK-Mel-5	GO:0032212	positive regulation of telomere maintenance via telomerase	16/3566	34/18723	0.000191312	0.00555961	0.00441071	8658/5570/79618/8550/3178/1499/5073/6950/92345/7203/22948/10575/10694/10574/10576/1736	16
SK-Mel-5	GO:0009126	purine nucleoside monophosphate metabolic process	19/3566	44/18723	0.000203475	0.0058857	0.00466941	221264/260425/203/9414/3614/3615/2618/5198/205/5471/10606/8833/471/271/3251/353/4860/100/4907	19
SK-Mel-5	GO:0009123	nucleoside monophosphate metabolic process	28/3566	76/18723	0.000208838	0.00596689	0.00473382	221264/260425/203/54963/83549/9414/3614/3615/2618/5198/7378/7372/205/5471/10606/8833/129607/471/271/3251/1723/353/5631/5634/7371/4860/100/4907	28
SK-Mel-5	GO:0031100	animal organ regeneration	28/3566	76/18723	0.000208838	0.00596689	0.00473382	6387/55959/2621/23175/2737/7048/6143/87178/8013/5111/5774/1956/5471/10419/5727/471/1026/6217/7049/3936/9076/306/1374/595/1051/4837/3569/5228	28
SK-Mel-5	GO:0001657	ureteric bud development	32/3566	91/18723	0.000209147	0.00596689	0.00473382	6092/4435/4091/6662/2263/6385/3911/2737/2297/1499/596/9353/5727/2247/384/6495/55083/51804/4609/7422/4088/6422/2668/6382/4092/6299/80000/655/7490/3280/30812/10252	32
SK-Mel-5	GO:0042552	myelination	43/3566	134/18723	0.00021082	0.00598727	0.00475	443/8506/5354/5453/22933/3766/4359/11076/23175/5376/5764/10397/2064/9444/745/4155/10939/5339/5916/1499/2068/3074/1605/84668/23136/2581/57463/1191/8892/57211/3687/152189/79628/256987/27242/83700/6285/1959/7133/9331/5803/5454/10215	43
SK-Mel-5	GO:0060740	prostate gland epithelium morphogenesis	13/3566	25/18723	0.000219703	0.00618335	0.00490555	23213/2099/6662/2263/10116/10481/3209/5916/3239/7474/6422/655/3371	13
SK-Mel-5	GO:0070199	establishment of protein localization to chromosome	13/3566	25/18723	0.000219703	0.00618335	0.00490555	7013/6950/55011/7203/22948/10575/10856/10694/10574/10576/1736/79035/7015	13
SK-Mel-5	GO:0090132	epithelium migration	96/3566	360/18723	0.000223177	0.00625295	0.00496077	5176/3815/348/11156/11167/51466/659/3037/25960/7042/2113/8503/2896/4233/4163/5581/6662/2752/3728/3373/25959/4215/3315/9839/10013/5764/5629/51057/5797/2185/5607/3964/7048/57449/5547/5170/9270/5793/9647/6868/27086/51094/10000/3688/493/116150/9404/57381/2252/2822/5216/4780/3675/575/388/1960/9353/8754/1839/6714/3673/80005/5468/4208/2247/6678/5829/11221/2876/7857/7046/154796/153090/161742/7422/9734/74…	96
SK-Mel-5	GO:0061458	reproductive system development	111/3566	427/18723	0.000224797	0.00627022	0.00497447	51673/5176/23213/7942/3815/6092/6696/2034/659/4435/7042/2099/3157/56977/6662/2057/8031/57728/2263/10116/192670/2309/5764/8320/8648/4323/55224/2737/10481/6926/1515/1718/3209/84687/5916/10265/841/1499/677/1495/57647/8322/10549/8894/2067/84159/2627/1299/4678/7301/596/1027/9353/5654/3326/3726/6714/3239/5727/1050/409/5468/4254/8531/55840/8892/8372/7046/51804/4311/25976/9021/7022/7422/100/9510/5270/747…	111
SK-Mel-5	GO:0090130	tissue migration	97/3566	365/18723	0.000236924	0.00657911	0.00521952	5176/3815/348/59/11156/11167/51466/659/3037/25960/7042/2113/8503/2896/4233/4163/5581/6662/2752/3728/3373/25959/4215/3315/9839/10013/5764/5629/51057/5797/2185/5607/3964/7048/57449/5547/5170/9270/5793/9647/6868/27086/51094/10000/3688/493/116150/9404/57381/2252/2822/5216/4780/3675/575/388/1960/9353/8754/1839/6714/3673/80005/5468/4208/2247/6678/5829/11221/2876/7857/7046/154796/153090/161742/7422/9734…	97
SK-Mel-5	GO:0048638	regulation of developmental growth	89/3566	330/18723	0.000246434	0.00681292	0.00540502	6387/3479/57556/348/10512/4137/6696/659/23105/32/65078/393/137964/1954/6792/57678/2263/53335/80031/5802/5629/8482/5465/4211/22902/10439/5292/3897/7048/583/10939/2258/23236/2593/51760/57057/2627/27230/657/596/1027/2045/3776/114804/2539/5727/9723/407975/4208/375790/2247/8531/27429/51393/11221/3142/6495/10507/84879/10505/8835/6909/1026/7046/7049/51804/8851/343472/7422/9962/9423/54910/7474/6405/22311…	89
SK-Mel-5	GO:0001755	neural crest cell migration	22/3566	55/18723	0.000253499	0.00696906	0.00552889	57556/10512/1910/80031/8482/3911/5308/9723/4254/55698/90/10507/10505/54910/6405/2668/223117/10371/9464/655/10501/30812	22
SK-Mel-5	GO:0071897	DNA biosynthetic process	54/3566	180/18723	0.000254313	0.00696906	0.00552889	659/353497/8658/5570/11201/57804/10715/10039/2185/7157/84875/7011/79618/8550/3178/1499/5073/7013/6950/85456/3320/9100/5984/54107/27000/5111/92345/7486/7203/54552/3181/22948/10575/5983/54984/10694/3776/10574/1843/3326/10576/6714/409/1736/5427/55651/2247/5426/1026/4609/8877/9314/7015/2264	54
SK-Mel-5	GO:0034111	negative regulation of homotypic cell-cell adhesion	9/3566	14/18723	0.000257424	0.00698755	0.00554356	18/114897/5592/5580/5270/80139/10019/634/84959	9
SK-Mel-5	GO:0043173	nucleotide salvage	9/3566	14/18723	0.000257424	0.00698755	0.00554356	54963/83549/93100/7378/271/3251/353/7371/100	9
SK-Mel-5	GO:0048608	reproductive structure development	110/3566	424/18723	0.000259693	0.00698755	0.00554356	51673/5176/23213/7942/3815/6092/6696/2034/659/4435/7042/2099/3157/56977/6662/2057/8031/57728/2263/10116/192670/2309/5764/8320/8648/4323/55224/2737/10481/6926/1515/1718/3209/5916/10265/841/1499/677/1495/57647/8322/10549/8894/2067/84159/2627/1299/4678/7301/596/1027/9353/5654/3326/3726/6714/3239/5727/1050/409/5468/4254/8531/55840/8892/8372/7046/51804/4311/25976/9021/7022/7422/100/9510/5270/7474/5156…	110
SK-Mel-5	GO:0032373	positive regulation of sterol transport	17/3566	38/18723	0.000260589	0.00698755	0.00554356	348/10347/5360/21/23461/302/6342/2874/26119/29801/10062/5727/5468/10351/19/80820/154664	17
SK-Mel-5	GO:0032376	positive regulation of cholesterol transport	17/3566	38/18723	0.000260589	0.00698755	0.00554356	348/10347/5360/21/23461/302/6342/2874/26119/29801/10062/5727/5468/10351/19/80820/154664	17
SK-Mel-5	GO:0072163	mesonephric epithelium development	32/3566	92/18723	0.000262816	0.00698755	0.00554356	6092/4435/4091/6662/2263/6385/3911/2737/2297/1499/596/9353/5727/2247/384/6495/55083/51804/4609/7422/4088/6422/2668/6382/4092/6299/80000/655/7490/3280/30812/10252	32
SK-Mel-5	GO:0072164	mesonephric tubule development	32/3566	92/18723	0.000262816	0.00698755	0.00554356	6092/4435/4091/6662/2263/6385/3911/2737/2297/1499/596/9353/5727/2247/384/6495/55083/51804/4609/7422/4088/6422/2668/6382/4092/6299/80000/655/7490/3280/30812/10252	32
SK-Mel-5	GO:0018108	peptidyl-tyrosine phosphorylation	99/3566	375/18723	0.00026579	0.00703667	0.00558253	695/3479/3815/6850/2621/3702/28996/9149/4233/5581/5526/1195/2263/2241/56940/80725/1856/3717/80851/960/8764/57396/1795/2064/2185/5607/5608/7157/4750/8798/2044/79834/9625/5912/6868/57732/4038/56034/3066/5062/199731/3678/1956/2252/7301/7006/91461/3480/4919/5580/2045/1839/3570/9052/6714/8692/4145/409/5621/4254/83666/54206/3592/90/5770/10507/4067/7039/238/9181/10420/9021/4739/7422/7804/1946/7132/5156/…	99
SK-Mel-5	GO:2000241	regulation of reproductive process	51/3566	168/18723	0.000271493	0.00715734	0.00567827	3479/11105/5176/23213/2099/6662/22933/6812/1910/6196/79400/253943/79846/55743/9319/23236/1499/26271/57647/10549/3066/27161/8912/4882/1027/708/1843/5047/6714/3239/10184/993/55840/151056/2683/8372/7076/7422/100/5028/7474/6422/2827/10371/655/7490/130399/5327/6615/3976/7262	51
SK-Mel-5	GO:0016054	organic acid catabolic process	68/3566	240/18723	0.000287943	0.00754342	0.00598456	443/137872/197257/160428/18/4329/3176/112817/10157/35/1666/32/414328/64900/5973/51380/2752/51005/2805/80150/56603/55258/3032/11112/3155/283927/80724/55577/2110/10994/23175/36/8659/34/84129/8660/56922/38/5465/39/6342/56898/23475/5826/549/3667/10449/10005/30/587/51/2744/493/26061/9942/27349/51166/10478/5471/2184/191/23576/384/84879/2571/1374/8942/4843	68
SK-Mel-5	GO:0046189	phenol-containing compound biosynthetic process	19/3566	45/18723	0.00028976	0.00754342	0.00598456	7306/538/1638/4948/4435/6490/7042/51151/7220/1497/9839/7299/1652/3642/2643/2861/7474/4929/9464	19
SK-Mel-5	GO:0051180	vitamin transport	19/3566	45/18723	0.00028976	0.00754342	0.00598456	29988/8029/10560/5826/79581/81034/81031/113235/6573/7274/51293/8884/6513/80704/9962/9429/376497/6515/4036	19
SK-Mel-5	GO:0009743	response to carbohydrate	71/3566	253/18723	0.000292006	0.00757036	0.00600593	5176/2696/10891/2621/6659/26137/5581/2752/8398/2805/111/5165/2021/6844/54795/57678/55450/2309/84327/8660/6196/387597/6648/2185/5608/3956/80339/9324/5208/1515/7048/5579/2281/10497/2044/25874/29085/9024/677/8891/55011/2067/5563/2822/133308/1027/4199/3480/3939/2730/1728/3673/6546/6934/6678/8892/23516/4067/4830/415116/1958/1946/3795/8938/4041/4023/3383/5743/130399/55107/7057	71
SK-Mel-5	GO:0046395	carboxylic acid catabolic process	67/3566	236/18723	0.000298766	0.00765235	0.00607099	443/137872/197257/160428/18/4329/3176/112817/10157/35/1666/32/414328/64900/5973/51380/2752/51005/2805/80150/56603/3032/11112/3155/283927/80724/55577/2110/10994/23175/36/8659/34/84129/8660/56922/38/5465/39/6342/56898/23475/5826/549/3667/10449/10005/30/587/51/2744/493/26061/9942/27349/51166/10478/5471/2184/191/23576/384/84879/2571/1374/8942/4843	67
SK-Mel-5	GO:0097191	extrinsic apoptotic signaling pathway	63/3566	219/18723	0.000301259	0.00765235	0.00607099	3479/7042/8996/11337/10116/2309/6591/64798/3717/6272/5607/2537/5598/8717/5170/10197/841/51202/1495/55179/4170/10962/5062/5519/3685/2070/57630/596/9531/3570/2730/597/7128/6714/8692/4254/64112/6934/3592/27429/2876/90/7857/7046/9181/153090/467/4055/219699/4088/5366/7132/6422/2668/7133/3655/85450/6376/3383/7015/51330/7078/7057	63
SK-Mel-5	GO:0001656	metanephros development	30/3566	85/18723	0.000302497	0.00765235	0.00607099	6092/4435/3913/6662/38/2737/51107/2297/5455/1499/596/79191/5727/6495/2200/55083/51804/1958/4609/5156/2668/6299/80000/25937/655/7490/3280/30812/3976/10252	30
SK-Mel-5	GO:0007272	ensheathment of neurons	43/3566	136/18723	0.000302876	0.00765235	0.00607099	443/8506/5354/5453/22933/3766/4359/11076/23175/5376/5764/10397/2064/9444/745/4155/10939/5339/5916/1499/2068/3074/1605/84668/23136/2581/57463/1191/8892/57211/3687/152189/79628/256987/27242/83700/6285/1959/7133/9331/5803/5454/10215	43
SK-Mel-5	GO:0008366	axon ensheathment	43/3566	136/18723	0.000302876	0.00765235	0.00607099	443/8506/5354/5453/22933/3766/4359/11076/23175/5376/5764/10397/2064/9444/745/4155/10939/5339/5916/1499/2068/3074/1605/84668/23136/2581/57463/1191/8892/57211/3687/152189/79628/256987/27242/83700/6285/1959/7133/9331/5803/5454/10215	43
SK-Mel-5	GO:0033865	nucleoside bisphosphate metabolic process	41/3566	128/18723	0.000304967	0.00765235	0.00607099	8034/4967/10157/3157/32/137964/4597/80221/5165/3155/283927/57678/84532/38/5160/9200/84836/55902/4598/23181/1738/5164/10005/25874/2182/5163/134526/51144/51166/84649/5166/2181/11332/8460/8459/9060/5167/2180/8942/1836/54898	41
SK-Mel-5	GO:0033875	ribonucleoside bisphosphate metabolic process	41/3566	128/18723	0.000304967	0.00765235	0.00607099	8034/4967/10157/3157/32/137964/4597/80221/5165/3155/283927/57678/84532/38/5160/9200/84836/55902/4598/23181/1738/5164/10005/25874/2182/5163/134526/51144/51166/84649/5166/2181/11332/8460/8459/9060/5167/2180/8942/1836/54898	41
SK-Mel-5	GO:0034032	purine nucleoside bisphosphate metabolic process	41/3566	128/18723	0.000304967	0.00765235	0.00607099	8034/4967/10157/3157/32/137964/4597/80221/5165/3155/283927/57678/84532/38/5160/9200/84836/55902/4598/23181/1738/5164/10005/25874/2182/5163/134526/51144/51166/84649/5166/2181/11332/8460/8459/9060/5167/2180/8942/1836/54898	41
SK-Mel-5	GO:0072659	protein localization to plasma membrane	78/3566	284/18723	0.000316487	0.00790964	0.0062751	5865/283576/23555/30818/999/2621/10133/582/9528/5581/10580/6812/3728/8417/4644/10966/256764/6844/245812/23241/57512/353116/91663/288/9053/302/23433/4323/3911/129303/6711/55737/7879/5064/65267/10139/6809/25999/26119/29801/55704/9341/5864/583/5170/64689/9270/84687/9545/2258/3688/493/57217/1956/91461/2633/84668/3675/23136/483/9351/5727/2181/5621/81619/83871/11031/163882/30845/5318/5028/7132/79156/10…	78
SK-Mel-5	GO:0003151	outflow tract morphogenesis	27/3566	74/18723	0.000322749	0.008034	0.00637376	10512/6092/659/7042/4091/2263/1856/55742/6926/7048/5308/1499/57057/2627/657/182/407975/4208/6495/6909/7049/7422/7474/4036/9464/655/3280	27
SK-Mel-5	GO:0051216	cartilage development	56/3566	190/18723	0.000325936	0.00808114	0.00641116	23213/4094/538/55959/659/1302/57326/7059/6662/3373/7067/57560/871/2121/6591/3213/960/2737/649/7048/55553/65992/1893/5916/1499/3200/2648/864/4060/656/657/2822/91461/2131/8692/4208/2247/23516/8372/7046/7076/22856/4088/51320/7474/4092/7480/2690/9464/655/6615/1833/1746/7045/8091/6781	56
SK-Mel-5	GO:0097306	cellular response to alcohol	32/3566	93/18723	0.000328406	0.00811021	0.00643422	114881/94241/999/108/3157/5581/3728/111/112/2309/6648/9400/1499/1495/107/5563/2822/1605/641/5727/9962/7804/19/109/3709/10365/6422/9314/196/687/57476/3371	32
SK-Mel-5	GO:0021700	developmental maturation	77/3566	280/18723	0.000330108	0.00812014	0.00644211	64100/695/3479/51286/63827/645811/30819/2034/7042/117155/7059/22933/6812/23682/137964/1910/5364/57560/10981/152015/54763/10116/53335/2309/6196/2185/388552/10481/5064/10497/5864/1738/9319/1499/26271/2068/7534/54888/865/201164/11334/23294/596/5991/5216/4882/22859/1605/2131/2539/5047/1050/84456/5468/375790/26256/10507/29842/1026/153090/8851/7422/10365/8938/7474/631/4929/7480/6376/55612/9331/26468/29…	77
SK-Mel-5	GO:1902895	positive regulation of pri-miRNA transcription by RNA polymerase II	18/3566	42/18723	0.000333191	0.00816384	0.00647677	7042/4091/2113/2309/7157/2908/2353/657/5468/2247/26354/1958/3725/4088/9314/7015/7490/8061	18
SK-Mel-5	GO:1901617	organic hydroxy compound biosynthetic process	67/3566	237/18723	0.000340217	0.00830342	0.00658751	7306/114881/348/538/1638/4948/4435/6490/4047/7042/51151/3157/7220/7108/4597/2805/114876/10826/1593/3638/1497/9839/6591/9517/5360/7299/5629/1652/10682/6307/3642/2185/84105/427/9677/51706/6342/114883/4598/1718/10449/79947/10005/1717/10613/64768/80271/116150/8912/2643/5563/3930/5805/2539/51477/2861/2247/114880/51700/26031/8877/5028/7474/4929/2264/9464/6615	67
SK-Mel-5	GO:0060541	respiratory system development	59/3566	203/18723	0.000343686	0.00835545	0.00662878	538/2034/659/79925/6662/83716/7289/7067/2263/5764/21/5629/51057/4323/3911/2737/7048/84976/5864/1522/5916/1499/7534/2627/1956/657/2252/1605/91461/7043/3675/2131/1050/1977/407975/2247/6678/54206/6495/9242/1978/51804/57493/4311/7422/100/10365/7474/7068/5156/53834/7490/51176/3280/3976/10252/10253/84695/3371	59
SK-Mel-5	GO:0072009	nephron epithelium development	36/3566	109/18723	0.000359281	0.00870072	0.0069027	9788/4435/28999/3913/6662/26249/8842/38/4643/3911/2737/9863/2297/5455/1499/596/79191/2131/5727/182/4208/2247/6495/55083/51804/4609/7422/2668/6299/80000/25937/7490/3280/30812/65266/3976	36
SK-Mel-5	GO:0001659	temperature homeostasis	52/3566	174/18723	0.000362517	0.00871078	0.00691068	18/6850/10891/2034/2104/3662/5334/1666/7067/1910/6319/23175/7442/5565/3717/85440/5608/23135/115209/5564/324/10062/6778/6868/1778/51094/56034/4857/3480/3566/192111/51393/2876/43/216/2180/8792/1958/133522/7422/3910/376497/2827/7480/9536/3397/79054/5618/1051/5743/2171/948	52
SK-Mel-5	GO:0048843	negative regulation of axon extension involved in axon guidance	13/3566	26/18723	0.000363051	0.00871078	0.00691068	57556/10512/80031/8482/9723/10507/10505/54910/7474/6405/223117/10371/10501	13
SK-Mel-5	GO:0060395	SMAD protein signal transduction	29/3566	82/18723	0.000363879	0.00871078	0.00691068	79674/659/4435/7042/4091/28996/4093/11030/64081/3717/25970/10140/6711/9863/656/2353/657/81031/7431/7043/5468/57178/7046/3725/4088/4092/25937/655/9518	29
SK-Mel-5	GO:1903362	regulation of cellular protein catabolic process	71/3566	255/18723	0.000374622	0.00893374	0.00708757	114881/348/255488/2272/84074/28996/144165/754/22933/10444/65018/11337/1017/302/29116/80279/29978/2185/210/55737/256471/55070/51136/11236/55743/9604/285671/26234/2768/11146/65992/10197/1855/10134/5706/55353/6125/5702/3320/5700/5347/10213/8312/6201/51377/25897/56893/1457/4780/51339/3326/79589/7128/1050/1191/9532/4130/2876/5045/153090/4983/10221/1263/4248/84900/4092/1950/27074/57761/7480/4036	71
SK-Mel-5	GO:0034504	protein localization to nucleus	79/3566	290/18723	0.00038247	0.00908622	0.00720854	999/6850/9679/144165/166614/754/10347/6662/2752/3728/9670/3717/5569/55929/56957/80279/1408/400916/2737/7157/57506/9913/23515/1855/7037/151636/1495/1434/6950/3621/26092/602/2634/5347/10527/7486/3843/7203/4869/5901/23212/9631/347/84154/22948/29107/10575/9531/54984/10694/5580/10574/163590/3326/10576/79711/6714/4927/8692/7545/1736/83666/6495/705/1026/129401/51804/10758/9221/10762/4088/83593/25937/701…	79
SK-Mel-5	GO:0060442	branching involved in prostate gland morphogenesis	8/3566	12/18723	0.000407439	0.00940954	0.00746505	2099/2263/10116/10481/3209/3239/6422/655	8
SK-Mel-5	GO:0060788	ectodermal placode formation	8/3566	12/18723	0.000407439	0.00940954	0.00746505	5629/10718/6926/1499/3066/6495/6909/51804	8
SK-Mel-5	GO:0061430	bone trabecula morphogenesis	8/3566	12/18723	0.000407439	0.00940954	0.00746505	7059/5364/22904/10507/133522/2201/6422/7480	8
SK-Mel-5	GO:0071697	ectodermal placode morphogenesis	8/3566	12/18723	0.000407439	0.00940954	0.00746505	5629/10718/6926/1499/3066/6495/6909/51804	8
SK-Mel-5	GO:0090331	negative regulation of platelet aggregation	8/3566	12/18723	0.000407439	0.00940954	0.00746505	18/114897/5592/5580/5270/10019/634/84959	8
SK-Mel-5	GO:1903405	protein localization to nuclear body	8/3566	12/18723	0.000407439	0.00940954	0.00746505	6950/7203/22948/10575/10694/10574/10576/1736	8
SK-Mel-5	GO:1904867	protein localization to Cajal body	8/3566	12/18723	0.000407439	0.00940954	0.00746505	6950/7203/22948/10575/10694/10574/10576/1736	8
SK-Mel-5	GO:0061326	renal tubule development	32/3566	94/18723	0.000408128	0.00940954	0.00746505	9788/4435/6662/26249/8842/38/3911/2737/2297/5455/1499/596/79191/1282/5727/182/4208/2247/6495/55083/51804/4609/7422/2668/6299/80000/25937/7490/3280/30812/65266/3976	32
SK-Mel-5	GO:0014706	striated muscle tissue development	100/3566	384/18723	0.000418426	0.00957637	0.0075974	3479/10324/6331/10512/3398/7042/6444/3131/84466/22933/91807/25776/80206/56603/8324/858/4703/2263/34/23363/5629/5465/4211/6548/4488/5292/23135/6926/7048/55553/2317/5339/10521/1756/57486/1832/1499/2648/3688/1829/57057/2353/2627/10052/657/596/79191/3344/3776/2280/2539/1827/51676/409/4061/407975/10848/6546/3276/4208/2247/8531/2876/3142/6495/607/90/115509/9242/6909/7046/7049/9456/51804/57493/1958/6840…	100
SK-Mel-5	GO:0043473	pigmentation	33/3566	98/18723	0.00041843	0.00957637	0.0075974	7306/3815/538/79083/1638/4948/4435/6490/5873/129880/51151/79090/4935/23682/1910/10981/4644/9839/6591/4286/7299/11234/388552/2737/23334/583/84100/55686/596/4254/4208/5167/57619	33
SK-Mel-5	GO:0097009	energy homeostasis	16/3566	36/18723	0.000430993	0.0098279	0.00779695	10891/23373/32/284207/64784/115209/5547/1981/8013/5563/79191/271/84879/238/51320/948	16
SK-Mel-5	GO:0014812	muscle cell migration	36/3566	110/18723	0.000437477	0.00987466	0.00783405	3479/538/10891/3037/84466/5592/5361/80031/55742/85440/9270/2768/8013/10276/657/596/4780/51177/9353/6714/3673/80005/6282/4208/6495/51804/9294/10221/9510/6653/54434/9732/7015/5327/301/3690	36
SK-Mel-5	GO:0061387	regulation of extent of cell growth	36/3566	110/18723	0.000437477	0.00987466	0.00783405	6387/57556/348/10512/4137/6696/659/23105/65078/393/1954/6792/80031/5802/8482/22902/10439/3897/2258/2045/9723/51393/10507/10505/8851/343472/7422/9423/54910/7474/6405/223117/10371/10501/4133/4897	36
SK-Mel-5	GO:0006029	proteoglycan metabolic process	28/3566	79/18723	0.000437785	0.00987466	0.00783405	3479/23213/55959/659/3425/10090/3373/6448/337876/1499/9486/2135/9917/79586/81031/2131/92126/79690/6934/26035/26229/27087/10855/22856/90161/92370/1634/55790	28
SK-Mel-5	GO:0044262	cellular carbohydrate metabolic process	77/3566	283/18723	0.000467763	0.0105129	0.00834039	80201/3479/4485/10891/3037/90673/3425/114897/5581/32/414328/10580/3705/2805/5165/2548/55577/84572/34/8660/3628/84752/2997/1407/9852/5465/2185/5836/178/9677/5208/7157/56623/5213/10499/3667/3633/5164/57486/51094/64768/5209/2648/6120/5163/10447/2820/9942/2822/10678/2131/84649/950/5166/6714/90007/51477/84912/5167/2683/5255/5834/5366/3795/5028/3487/85414/8871/54541/8445/3099/4837/55790/93010/5507/5210…	77
SK-Mel-5	GO:0016266	O-glycan processing	18/3566	43/18723	0.000471903	0.0105302	0.0083541	10610/2591/6487/55624/2589/79695/27090/10678/56913/23509/727936/51809/6480/114805/2650/11226/6482/93010	18
SK-Mel-5	GO:0061383	trabecula morphogenesis	18/3566	43/18723	0.000471903	0.0105302	0.0083541	7042/7059/5364/22904/657/2280/57211/10507/7046/7049/57493/133522/2201/9510/6422/7480/655/23462	18
SK-Mel-5	GO:0045732	positive regulation of protein catabolic process	65/3566	231/18723	0.000474462	0.0105496	0.00836952	114881/348/255488/144165/754/6662/22933/83547/10444/11337/10297/27352/29116/29978/2185/55737/51160/7879/55070/51136/11236/55743/9604/79888/324/285671/26234/65992/1855/10134/5706/5702/3320/5700/5347/8312/25897/2822/1457/29763/1027/4780/51339/8754/79589/7128/1050/140462/1191/9532/6642/5045/153090/25976/10221/1263/7474/6653/84900/7133/4092/1950/57761/4036/51429	65
SK-Mel-5	GO:0006654	phosphatidic acid biosynthetic process	15/3566	33/18723	0.000482897	0.0106433	0.00844384	56895/137964/57678/23175/8526/51099/80339/63874/79888/55326/8527/253558/376497/84803/1608	15
SK-Mel-5	GO:0034110	regulation of homotypic cell-cell adhesion	15/3566	33/18723	0.000482897	0.0106433	0.00844384	18/6850/114897/5592/3717/288/3956/5580/4067/5270/80139/10019/3569/634/84959	15
SK-Mel-5	GO:0050678	regulation of epithelial cell proliferation	99/3566	381/18723	0.000483786	0.0106433	0.00844384	6387/3479/5176/23213/348/538/6331/55959/9788/659/3037/7423/7042/2896/4163/6662/2752/3373/26160/1910/57560/8324/858/5909/2263/6591/5764/5629/5797/64743/2064/5607/5365/567/128239/5170/1893/6868/1499/677/10000/864/8013/1956/657/2252/1027/3915/1960/5654/7128/5727/5468/4208/6934/2247/6678/54206/55840/3592/11221/2876/6495/219736/2683/7039/4830/7857/7046/7049/51804/153090/1021/9076/4609/7422/7538/4088/7…	99
SK-Mel-5	GO:0072080	nephron tubule development	31/3566	91/18723	0.000492023	0.0107694	0.00854389	9788/4435/6662/26249/8842/38/3911/2737/2297/5455/1499/596/79191/5727/182/4208/2247/6495/55083/51804/4609/7422/2668/6299/80000/25937/7490/3280/30812/65266/3976	31
SK-Mel-5	GO:0001889	liver development	45/3566	147/18723	0.000492965	0.0107694	0.00854389	538/55959/4233/3157/6662/50/3155/34/5764/5629/1628/38/80279/2737/3175/6143/87178/5111/440/84159/2627/5774/1956/205/10419/7128/5727/1050/3673/64841/3142/7039/6217/7049/9076/100/4088/1374/595/1051/3569/634/301/3280/1543	45
SK-Mel-5	GO:0034612	response to tumor necrosis factor	70/3566	253/18723	0.000497968	0.0108408	0.00860051	79092/6850/10891/3037/11093/2621/6609/2678/3373/1244/3899/2021/7442/8996/2309/56928/3717/29965/8764/2686/2185/427/7157/22900/81858/2874/8717/6868/841/677/2648/2634/2643/4780/2633/2131/8754/1984/7128/1050/100506658/8692/965/7187/8531/4217/8372/10401/9181/153090/8792/9076/10758/27242/10673/7538/81/8877/10365/7132/6422/7133/2150/55504/6376/3383/5743/330/7057/3576	70
SK-Mel-5	GO:0030516	regulation of axon extension	32/3566	95/18723	0.000504514	0.0109451	0.00868331	6387/57556/348/10512/4137/659/65078/393/1954/6792/80031/5802/8482/22902/10439/3897/9723/51393/10507/10505/8851/343472/7422/9423/54910/7474/6405/223117/10371/10501/4133/4897	32
SK-Mel-5	GO:0099173	postsynapse organization	50/3566	168/18723	0.000516534	0.0111671	0.00885944	547/1501/348/115703/26052/6792/80725/10013/5764/5802/10397/10160/80823/65981/55737/57502/23181/80728/78999/1855/3312/4038/85461/3480/94030/3675/2045/5621/23613/26037/9456/26115/55619/22891/8851/9722/4983/58489/7804/57622/7474/6405/54434/2668/1000/2904/4744/5789/55607/3556	50
SK-Mel-5	GO:0048568	embryonic organ development	109/3566	427/18723	0.000524417	0.0112985	0.00896363	7942/3815/3398/2034/4435/7042/9935/7020/28996/129880/5013/6662/7289/3373/26160/1954/79955/3218/83852/9775/3638/57728/2263/11078/1856/9645/5629/8320/51057/3213/525/8648/4323/2737/9742/7157/6926/4669/7048/5308/286262/5916/10265/1855/841/1499/677/7004/3200/2068/29985/56034/57057/2067/657/91461/26018/7043/3198/3726/5727/1050/25902/51676/115908/7545/10848/4254/4208/84189/3142/6495/5426/219736/90/2200/…	109
SK-Mel-5	GO:0007229	integrin-mediated signaling pathway	35/3566	107/18723	0.000527211	0.0113041	0.00896807	9358/6850/11093/1307/4185/3695/3909/5764/8482/3911/2185/9270/1495/3688/3678/3685/81031/7006/3675/8754/6714/3673/3693/7076/3687/4739/9510/3655/3672/55612/634/3676/3690/84695/8515	35
SK-Mel-5	GO:0007178	transmembrane receptor protein serine/threonine kinase signaling pathway	93/3566	355/18723	0.000528295	0.0113041	0.00896807	3248/23213/9315/79674/11167/128853/659/4435/7042/4091/28996/1954/4093/2805/858/11030/9839/56940/64081/3717/5465/151742/25970/10140/6711/7157/7048/3175/9863/4926/2297/5170/3209/6868/656/57057/200734/9404/2353/657/81031/7431/53918/7043/3675/2131/2280/8754/5654/3326/6714/409/407975/5468/5829/90/2200/5045/3693/57178/7046/7049/161742/1958/2201/3725/4088/7474/6653/6422/23089/4092/80139/135228/51232/504…	93
SK-Mel-5	GO:0010906	regulation of glucose metabolic process	38/3566	119/18723	0.000531307	0.0113297	0.00898841	3479/4485/10891/90673/114897/32/10580/5165/34/8660/1407/9852/5465/5208/7157/10499/3667/5164/57486/51094/2648/5163/10447/2822/84649/5166/6714/90007/84912/5167/5366/3795/3487/85414/8445/4837/5507/7262	38
SK-Mel-5	GO:1990778	protein localization to cell periphery	88/3566	333/18723	0.000545125	0.0115848	0.00919081	5865/283576/23555/30818/999/10815/2621/10133/582/9528/5581/10580/6812/3728/8417/57560/4644/10966/256764/57728/6844/245812/23241/57512/353116/91663/288/9053/302/23433/4323/3911/129303/6711/55737/7879/5064/65267/10139/6809/25999/26119/9179/29801/55704/4926/9341/5864/583/5170/64689/9270/84687/9545/2258/3688/5347/493/57217/1956/1605/91461/2633/84668/3675/23136/483/9351/5727/2181/5621/81619/83871/8995…	88
SK-Mel-5	GO:0021766	hippocampus development	28/3566	80/18723	0.00055264	0.0117047	0.00928593	63827/166614/4967/9638/5802/5629/8648/79969/2737/23135/2145/2044/583/84687/2258/8891/493/84879/4830/238/8851/1021/7804/306/10501/1745/51176/1746	28
SK-Mel-5	GO:0010799	regulation of peptidyl-threonine phosphorylation	19/3566	47/18723	0.000561304	0.0118481	0.00939964	22933/65267/808/1981/85456/5347/199731/200734/8312/219736/9294/161742/8877/7474/4092/1950/54541/655/10253	19
SK-Mel-5	GO:0050807	regulation of synapse organization	60/3566	211/18723	0.000572502	0.0120437	0.00955488	547/348/6092/7846/266727/115703/26052/6792/80725/5764/5802/10160/80823/65981/55737/78999/3312/1981/4038/7534/203068/22859/1605/94030/575/2045/23768/57463/5621/4208/375790/6678/23613/84189/26037/6495/10507/2823/9456/51804/153090/26115/8851/347902/58489/7804/139065/57622/9423/7474/6405/84631/1000/2904/10082/2239/5789/55607/3556/23266	60
SK-Mel-5	GO:0003272	endocardial cushion formation	13/3566	27/18723	0.00057868	0.0120716	0.00957702	6092/7042/6591/6926/7048/57057/657/90/6909/7046/55273/655/6615	13
SK-Mel-5	GO:0060512	prostate gland morphogenesis	13/3566	27/18723	0.00057868	0.0120716	0.00957702	23213/2099/6662/2263/10116/10481/3209/5916/3239/7474/6422/655/3371	13
SK-Mel-5	GO:0044272	sulfur compound biosynthetic process	45/3566	148/18723	0.000579624	0.0120716	0.00957702	6487/10090/32/51380/2678/5165/55256/84532/337876/38/3029/5160/2686/9200/55902/23181/1738/5164/25874/2182/5163/79586/9435/51144/262/10678/4780/2131/10402/2730/5166/4166/92126/2181/26035/9060/494143/2180/22856/79094/6482/1836/55790/54898/93010	45
SK-Mel-5	GO:0007004	telomere maintenance via telomerase	25/3566	69/18723	0.0005973	0.0123984	0.00983629	8658/5570/79618/8550/3178/1499/5073/7013/6950/85456/3320/92345/7203/54552/22948/10575/54984/10694/10574/3326/10576/6714/1736/55651/7015	25
SK-Mel-5	GO:0009152	purine ribonucleotide biosynthetic process	50/3566	169/18723	0.000599982	0.0124129	0.00984774	8034/221264/10891/108/32/111/5165/65018/203/112/9605/84532/38/5465/5160/9200/8382/55902/23181/1738/5164/25874/2182/3614/2023/5163/3615/2618/5198/107/4833/51144/4882/205/5471/10606/8833/5166/2181/471/271/3251/11332/9060/4830/353/2180/109/1836/54898	50
SK-Mel-5	GO:0060602	branch elongation of an epithelium	10/3566	18/18723	0.000602993	0.012434	0.00986448	2099/6662/2263/3239/6495/51804/7474/10252/10253/3371	10
SK-Mel-5	GO:0051043	regulation of membrane protein ectodomain proteolysis	12/3566	24/18723	0.000611872	0.0125756	0.00997682	348/7077/9860/5774/2822/29763/8754/5045/7076/7133/51429/7078	12
SK-Mel-5	GO:0001823	mesonephros development	32/3566	96/18723	0.000620443	0.0127099	0.0100834	6092/4435/4091/6662/2263/6385/3911/2737/2297/1499/596/9353/5727/2247/384/6495/55083/51804/4609/7422/4088/6422/2668/6382/4092/6299/80000/655/7490/3280/30812/10252	32
SK-Mel-5	GO:0046473	phosphatidic acid metabolic process	16/3566	37/18723	0.00062615	0.0127849	0.0101429	56895/8398/137964/57678/23175/8526/51099/80339/63874/79888/55326/8527/253558/376497/84803/1608	16
SK-Mel-5	GO:0002934	desmosome organization	7/3566	10/18723	0.000630177	0.0128252	0.0101749	3728/6591/1832/1829/29841/64065/5318	7
SK-Mel-5	GO:0042058	regulation of epidermal growth factor receptor signaling pathway	26/3566	73/18723	0.000633995	0.012861	0.0102033	2241/1845/2537/10825/7879/55704/79651/27131/6868/57732/8527/5774/1956/55658/1839/9052/84058/54206/5782/7039/153090/1950/3672/3092/84632/634	26
SK-Mel-5	GO:0071901	negative regulation of protein serine/threonine kinase activity	38/3566	120/18723	0.000636818	0.0128765	0.0102156	348/6609/5570/1031/5569/80279/5575/324/26973/10614/5347/10527/3843/10251/1027/5580/7023/1843/7128/1050/8692/5468/6546/11221/5770/4067/1026/153090/57493/6653/6422/4041/655/10019/1028/10252/10253/81848	38
SK-Mel-5	GO:0018107	peptidyl-threonine phosphorylation	37/3566	116/18723	0.000639563	0.0128903	0.0102265	28996/9149/8658/22933/1195/65267/7048/8798/5579/8476/808/5170/1981/85456/5347/199731/200734/8312/596/1457/11113/5580/219736/90/7046/9294/8851/161742/8877/7474/4092/1950/8444/54541/8445/655/10253	37
SK-Mel-5	GO:0051017	actin filament bundle assembly	47/3566	157/18723	0.000648771	0.0130338	0.0103404	9788/51466/64780/4233/10580/83543/4082/118/55160/22998/6385/2185/6548/55704/5358/9270/116985/9647/119/253980/85415/5062/9124/5216/7043/5074/1809/221061/55971/6714/5829/3693/7046/3936/29109/4739/23075/85462/4088/56776/6422/6624/3397/6376/5357/55607/1902	47
SK-Mel-5	GO:0006457	protein folding	60/3566	212/18723	0.000652613	0.013069	0.0103683	1410/25822/2896/10693/5480/79608/3315/11080/3338/957/10961/64772/567/6102/4820/2281/2286/10598/5202/3329/26973/3312/22926/6950/9141/51645/9601/3320/10808/27000/10549/7203/57003/10471/10131/10465/7841/22948/1457/10726/10575/10856/9531/10694/3337/169714/26278/10574/5203/2280/3998/3326/10576/80273/134266/30001/1191/2288/9532/3311	60
SK-Mel-5	GO:0009266	response to temperature stimulus	52/3566	178/18723	0.000654762	0.0130701	0.0103692	6387/3479/3490/4137/94241/10891/2766/9311/9481/7067/2898/1244/284207/7442/34/11080/6648/6548/1965/841/3329/26973/3320/27000/440275/8891/3066/2353/9531/3337/5433/3326/409/30001/4277/8892/27429/51393/4067/1026/63982/376497/3654/56925/4023/79054/5743/55107/6489/7425/7057/286133	52
SK-Mel-5	GO:0007492	endoderm development	27/3566	77/18723	0.000665898	0.0132501	0.0105119	1294/8861/1291/3909/8320/4323/3175/1499/677/57057/3678/3685/2627/657/53918/1284/2131/3915/1843/3693/4088/1847/4317/4324/3676/8091/1846	27
SK-Mel-5	GO:0098742	cell-cell adhesion via plasma-membrane adhesion molecules	74/3566	273/18723	0.000669632	0.0132821	0.0105373	1005/27255/1010/999/6092/7042/266727/56121/7216/56126/79633/56127/4359/56125/56108/56122/23562/56133/56103/23363/5802/56123/91663/5797/56138/5607/1008/56111/5365/3897/4155/7048/57717/5598/9069/78999/2195/3688/1829/5101/5792/214/91624/22859/94030/28513/57463/133418/1825/23022/10205/26025/90/9076/64881/347902/57863/5099/83872/5097/5817/55714/84631/91156/1000/9314/10082/53834/2239/6376/3383/5789/355…	74
SK-Mel-5	GO:1901888	regulation of cell junction assembly	58/3566	204/18723	0.000702893	0.0138977	0.0110257	6092/1307/266727/2889/8861/22998/6591/56940/6385/5802/51057/4867/4323/1845/10160/80823/6548/55737/79834/9270/9647/78999/1981/347/94030/79191/575/2045/23768/6714/57463/4208/375790/84189/6495/10507/51804/9076/347902/7422/139065/57622/1946/9423/4088/7474/6422/84631/10082/2239/1969/5789/55607/3556/6615/23266/3791/7057	58
SK-Mel-5	GO:0044282	small molecule catabolic process	97/3566	376/18723	0.000710061	0.0139952	0.011103	443/137872/348/197257/160428/18/4329/3176/217/112817/10157/35/1666/32/414328/64900/5973/51380/2752/51005/2805/80150/56603/55258/1593/3032/11112/3155/283927/80724/55577/2110/10994/23175/36/200316/8659/34/84129/8660/3628/56922/38/5465/3029/140564/2592/39/5208/7157/4835/6342/56623/56898/23475/5826/549/5213/3667/10449/3633/10005/30/587/51/9582/2744/2023/6120/493/7378/11164/2820/26061/9942/27349/51166…	97
SK-Mel-5	GO:0051973	positive regulation of telomerase activity	15/3566	34/18723	0.000713096	0.0140108	0.0111154	8658/5570/79618/8550/1499/5073/6950/3320/92345/10575/3326/10576/1736/4609/9314	15
SK-Mel-5	GO:0022604	regulation of cell morphogenesis	82/3566	309/18723	0.000720394	0.0141098	0.011194	3815/9886/3037/23580/10154/26039/5364/6792/55785/192670/53335/5361/11078/23363/1856/5764/91663/55742/51057/960/23433/2185/80823/65981/5365/5064/57194/114793/57580/1857/56965/9270/116985/9204/4628/1855/91010/3074/51760/30011/8322/5362/57381/10251/1605/2633/51177/708/23136/388/114804/221061/6714/80005/9723/6678/10507/84879/10435/4739/7422/9962/7804/11135/1946/81/5028/7474/6285/8437/54509/10602/3383…	82
SK-Mel-5	GO:0072522	purine-containing compound biosynthetic process	57/3566	200/18723	0.000728991	0.0142335	0.0112922	8034/221264/10891/108/32/111/5165/65018/203/112/9605/84532/38/5465/5160/9200/8382/55902/23181/1738/5164/25874/2182/3614/2023/5163/3615/2618/5198/107/4833/51144/262/4882/205/5471/10606/8833/5166/2181/471/271/3251/11332/9060/4830/353/2180/5631/5634/4860/100/109/1836/4907/4843/54898	57
SK-Mel-5	GO:0007517	muscle organ development	86/3566	327/18723	0.000734912	0.0143045	0.0113484	3479/10324/7042/6444/3131/1410/84466/22933/56603/7402/858/4703/2121/2263/5463/5629/3911/4638/10290/55553/84976/2317/3908/5339/10521/1756/57486/1832/1499/7004/9099/57057/2273/8912/84159/2353/27230/657/596/1605/575/3344/6300/1960/2280/1839/1827/51676/4061/4208/8531/56704/2876/3142/6495/607/115509/9242/7046/7049/9456/51804/57493/1958/6840/467/9734/4088/5318/7474/11023/6285/1959/3164/4092/7480/53834/…	86
SK-Mel-5	GO:0099177	regulation of trans-synaptic signaling	111/3566	440/18723	0.000741495	0.0143878	0.0114145	23349/3815/348/4137/999/10815/2259/5334/23373/5581/6812/320/3766/2752/8398/2898/57338/1759/65018/9775/6844/9498/9465/85445/29/5764/5802/3717/23621/58512/114781/8526/2185/22849/10718/6809/57502/84961/5575/57617/11188/9162/5579/5864/3908/808/9145/127262/84687/1855/23236/2648/3688/253980/440275/25897/107/1956/9229/2894/7532/55784/575/41/54899/6533/6714/84446/140730/409/5621/1977/4885/4208/23613/4130…	111
SK-Mel-5	GO:0031032	actomyosin structure organization	56/3566	196/18723	0.000755701	0.014618	0.0115972	10324/51466/4233/64097/10580/91807/541468/80206/55160/22998/4703/29767/6385/54822/23363/5629/399687/2185/257019/6548/7111/8476/55704/9270/5339/116985/4628/9647/1266/3688/2036/253980/85415/5062/9124/5216/11113/7043/84978/23136/221061/6714/5829/3693/7138/7046/122786/51804/29109/85462/4088/5156/6422/54566/55607/1902	56
SK-Mel-5	GO:0120162	positive regulation of cold-induced thermogenesis	32/3566	97/18723	0.000759176	0.0146191	0.011598	6850/10891/2034/2104/3662/1666/7067/6319/23175/5565/3717/23135/115209/5564/324/6778/1778/51094/56034/3480/3566/51393/43/2180/133522/7422/2827/79054/5618/1051/2171/948	32
SK-Mel-5	GO:0048706	embryonic skeletal system development	38/3566	121/18723	0.000760435	0.0146191	0.011598	23213/55959/7020/7289/3373/1954/3218/9775/57728/2263/3213/4323/2737/9742/7048/10265/1499/3200/29985/81031/7043/2131/3198/25902/3231/6495/3219/7046/51804/4088/7474/5156/56243/10655/655/1745/4325/1746	38
SK-Mel-5	GO:0061008	hepaticobiliary system development	45/3566	150/18723	0.000794512	0.0152273	0.0120806	538/55959/4233/3157/6662/50/3155/34/5764/5629/1628/38/80279/2737/3175/6143/87178/5111/440/84159/2627/5774/1956/205/10419/7128/5727/1050/3673/64841/3142/7039/6217/7049/9076/100/4088/1374/595/1051/3569/634/301/3280/1543	45
SK-Mel-5	GO:0060390	regulation of SMAD protein signal transduction	14/3566	31/18723	0.000803596	0.0153543	0.0121813	79674/659/11030/64081/3717/25970/10140/6711/657/81031/7043/5468/7046/25937	14
SK-Mel-5	GO:0043434	response to peptide hormone	105/3566	414/18723	0.000834267	0.0158775	0.0125964	6387/27019/4435/2549/8503/28999/29988/10580/64900/143686/1910/2805/1244/4644/54832/3638/6773/10768/858/6844/23175/7442/112/2241/84327/64397/8660/64506/3717/1407/23433/9852/5465/6272/5305/1408/6548/80339/1176/5579/3667/5164/324/5170/6778/27131/87178/51094/677/8013/8891/896/2822/7532/990/1027/1605/3480/4780/5471/5580/55971/5166/6714/5468/6513/10603/6678/54206/5829/8892/23516/5770/5167/2200/4067/288…	105
SK-Mel-5	GO:0070373	negative regulation of ERK1 and ERK2 cascade	27/3566	78/18723	0.000836061	0.0158775	0.0125964	57556/57447/55450/1845/140885/9270/51231/200734/10251/2633/1843/54206/11221/5770/4067/338761/153090/161742/467/9314/7078/1848/3976/10252/10253/1846/81848	27
SK-Mel-5	GO:0009100	glycoprotein metabolic process	99/3566	387/18723	0.000852571	0.0161031	0.0127754	3479/8707/10610/23213/54550/538/55959/55808/2591/659/283417/11093/7423/9528/3425/6487/10347/10090/374378/3373/256281/66008/54790/4125/6448/337876/84752/957/22906/26232/54344/9452/64772/93611/11236/79947/10005/64689/25825/23236/1499/55624/8703/9486/2589/79695/8869/2135/116150/27161/9917/79586/56983/27230/285203/81031/23333/27090/7841/9695/596/10678/64840/5074/56913/2131/7991/10402/23509/727936/183…	99
SK-Mel-5	GO:0072331	signal transduction by p53 class mediator	48/3566	163/18723	0.000853093	0.0161031	0.0127754	2272/6659/28996/754/51147/2309/6591/133746/29965/10397/960/80279/5608/7157/5164/8550/9099/10614/6125/602/9100/200734/4869/23212/6201/84154/596/1027/3428/7023/4839/10419/1984/64065/10514/64782/1026/6446/161742/23246/9521/1263/5366/8444/9891/54541/8445/6615	48
SK-Mel-5	GO:2000242	negative regulation of reproductive process	23/3566	63/18723	0.00086211	0.0161218	0.0127902	3479/5176/23213/6196/55743/9319/26271/10549/4882/1027/1843/5047/55840/8372/7076/100/7474/655/7490/130399/5327/6615/3976	23
SK-Mel-5	GO:0021545	cranial nerve development	20/3566	52/18723	0.000864404	0.0161218	0.0127902	9935/7020/89797/3213/2737/1499/3200/6152/2131/3198/84189/6495/51804/5205/6405/1959/6299/6507/10371/3280	20
SK-Mel-5	GO:0032206	positive regulation of telomere maintenance	20/3566	52/18723	0.000864404	0.0161218	0.0127902	8658/5570/79618/8550/3178/1499/5073/6950/92345/7203/2067/3181/22948/10575/10694/10574/10576/1736/79035/26354	20
SK-Mel-5	GO:0072132	mesenchyme morphogenesis	20/3566	52/18723	0.000864404	0.0161218	0.0127902	59/6092/7042/6662/6591/6926/7048/57057/657/90/6909/7046/4609/4088/7474/55273/655/23462/6615/51176	20
SK-Mel-5	GO:0071696	ectodermal placode development	8/3566	13/18723	0.000882197	0.0164047	0.0130146	5629/10718/6926/1499/3066/6495/6909/51804	8
SK-Mel-5	GO:2000117	negative regulation of cysteine-type endopeptidase activity	29/3566	86/18723	0.000886161	0.0164295	0.0130343	2621/64780/1410/8996/5896/960/5607/2537/22900/1718/5062/55011/57630/831/1457/3428/25816/6197/6714/409/54475/2876/7422/3164/27074/9314/5743/330/7057	29
SK-Mel-5	GO:1901031	regulation of response to reactive oxygen species	16/3566	38/18723	0.000892012	0.0164571	0.0130562	4233/143686/2021/65018/2309/10013/5831/8013/2643/10131/4780/5074/2861/10516/655/948	16
SK-Mel-5	GO:0009065	glutamine family amino acid catabolic process	13/3566	28/18723	0.000893051	0.0164571	0.0130562	137872/2752/2805/80150/8659/2744/493/5471/2184/23576/384/2571/4843	13
SK-Mel-5	GO:0008631	intrinsic apoptotic signaling pathway in response to oxidative stress	18/3566	45/18723	0.000903056	0.0164571	0.0130562	65018/8996/3315/3717/6648/8382/10494/5598/90441/4170/5163/10131/596/4780/5580/27429/2876/4217	18
SK-Mel-5	GO:0035384	thioester biosynthetic process	18/3566	45/18723	0.000903056	0.0164571	0.0130562	32/5165/84532/38/5160/9200/55902/23181/1738/5164/25874/2182/5163/51144/5166/2181/2180/54898	18
SK-Mel-5	GO:0071616	acyl-CoA biosynthetic process	18/3566	45/18723	0.000903056	0.0164571	0.0130562	32/5165/84532/38/5160/9200/55902/23181/1738/5164/25874/2182/5163/51144/5166/2181/2180/54898	18
SK-Mel-5	GO:0099175	regulation of postsynapse organization	30/3566	90/18723	0.000903452	0.0164571	0.0130562	547/348/115703/26052/6792/80725/5802/80823/65981/55737/78999/3312/94030/2045/5621/23613/26037/9456/26115/8851/58489/7804/57622/7474/6405/1000/2904/5789/55607/3556	30
SK-Mel-5	GO:0045446	endothelial cell differentiation	37/3566	118/18723	0.000914591	0.0166115	0.0131787	11167/659/2889/4233/25932/5144/118/5764/5802/91663/5629/9414/23135/3209/23236/1499/26084/182/1903/2876/90/9294/57493/9076/7422/7132/6935/2150/3397/55273/3383/23462/634/3791/1306/81575/6781	37
SK-Mel-5	GO:0048511	rhythmic process	79/3566	298/18723	0.000919607	0.0166542	0.0132126	5176/79365/3398/6096/6092/8863/10891/3037/7042/2113/3131/2099/23373/4987/23077/2309/55336/5764/5629/1407/1628/8648/9612/5465/114781/1408/5608/7157/4669/83759/10499/5187/10062/9099/8451/5111/4783/3615/8322/3066/79723/107/1956/5563/285382/22809/7301/1457/11245/7043/10419/1960/9353/6714/191/7071/4791/409/5468/10514/4862/8792/8851/1958/100/402055/9510/3725/56938/5156/1959/25819/6586/3397/196/3400/484…	79
SK-Mel-5	GO:0048754	branching morphogenesis of an epithelial tube	45/3566	151/18723	0.00092633	0.0166898	0.0132408	4435/2099/4233/25932/6662/2263/4323/3911/2737/6926/7048/2297/1522/1499/57057/596/1605/2131/1282/9353/6714/5727/9723/2247/6495/90/51804/4609/7422/7474/4041/2668/6299/1950/80000/1969/655/7490/3791/51176/30812/7421/10252/10253/3371	45
SK-Mel-5	GO:1901136	carbohydrate derivative catabolic process	50/3566	172/18723	0.000926915	0.0166898	0.0132408	3425/5973/51005/5144/3373/2760/283927/55577/3073/200316/6448/26232/960/38/140564/57704/10825/131870/2592/93611/4669/10846/2799/9582/55276/3074/2519/7378/9695/252969/5141/4913/5580/2581/191/8692/3251/11332/2247/79077/22875/216/8372/57089/10855/4860/100/5142/27115/4907	50
SK-Mel-5	GO:0030166	proteoglycan biosynthetic process	21/3566	56/18723	0.000954934	0.0170958	0.0135629	3479/659/10090/337876/1499/9486/2135/9917/79586/81031/2131/92126/79690/6934/26035/26229/27087/22856/90161/92370/55790	21
SK-Mel-5	GO:0048008	platelet-derived growth factor receptor signaling pathway	21/3566	56/18723	0.000954934	0.0170958	0.0135629	2241/3717/4643/7763/9860/8013/56034/84159/347/5157/6714/5782/5770/25976/64651/7422/5156/1464/2152/3092/5327	21
SK-Mel-5	GO:0003281	ventricular septum development	25/3566	71/18723	0.000967616	0.0171908	0.0136383	6092/659/7042/4091/6659/2263/5629/6926/7048/3209/657/9353/407975/90/7046/7049/57493/7474/4092/6299/6586/53834/4036/23462/3280	25
SK-Mel-5	GO:0046835	carbohydrate phosphorylation	12/3566	25/18723	0.000973875	0.0171908	0.0136383	80201/3705/55577/84572/5208/5213/64768/5209/9942/3795/3099/5210	12
SK-Mel-5	GO:0050927	positive regulation of positive chemotaxis	12/3566	25/18723	0.000973875	0.0171908	0.0136383	6387/7423/3603/3673/7857/7422/4088/2150/2152/3791/5228/3576	12
SK-Mel-5	GO:0090330	regulation of platelet aggregation	12/3566	25/18723	0.000973875	0.0171908	0.0136383	18/6850/114897/5592/3717/5580/4067/5270/10019/3569/634/84959	12
SK-Mel-5	GO:0060070	canonical Wnt signaling pathway	80/3566	303/18723	0.000974001	0.0171908	0.0136383	1501/348/55959/219287/9679/25960/6659/144165/4163/8658/6662/3728/7088/27303/8324/27123/54795/2263/2309/9839/6591/84327/147906/4286/1856/10297/83439/7089/81847/65981/2737/9580/1857/324/337867/5916/1855/1499/79960/4038/8322/151195/83786/8312/1956/7091/10856/64840/2131/51339/6714/115908/8607/440193/6934/2247/6932/84133/54475/607/153090/1958/10146/85458/23500/4088/7474/3487/6422/4041/1000/6382/1950/8…	80
SK-Mel-5	GO:0050804	modulation of chemical synaptic transmission	110/3566	439/18723	0.00100717	0.0174969	0.0138811	23349/3815/348/4137/999/10815/2259/5334/23373/5581/6812/320/3766/2752/8398/2898/57338/1759/65018/9775/6844/9498/9465/85445/29/5764/5802/3717/23621/58512/114781/8526/2185/22849/10718/6809/57502/84961/5575/57617/11188/9162/5579/5864/3908/808/9145/127262/84687/1855/23236/2648/3688/253980/440275/25897/107/1956/9229/2894/7532/55784/575/41/54899/6533/6714/84446/140730/409/5621/1977/4885/4208/23613/4130…	110
SK-Mel-5	GO:0006278	RNA-dependent DNA biosynthetic process	26/3566	75/18723	0.00100886	0.0174969	0.0138811	8658/5570/7011/79618/8550/3178/1499/5073/7013/6950/85456/3320/92345/7203/54552/22948/10575/54984/10694/10574/3326/10576/6714/1736/55651/7015	26
SK-Mel-5	GO:0061333	renal tubule morphogenesis	26/3566	75/18723	0.00100886	0.0174969	0.0138811	9788/4435/6662/26249/3911/2737/2297/1499/596/79191/1282/5727/4208/2247/6495/55083/51804/4609/7422/2668/6299/80000/7490/3280/30812/65266	26
SK-Mel-5	GO:0061548	ganglion development	9/3566	16/18723	0.00101579	0.0174969	0.0138811	7289/3642/1499/6495/10381/51804/8633/6405/10371	9
SK-Mel-5	GO:1902570	protein localization to nucleolus	9/3566	16/18723	0.00101579	0.0174969	0.0138811	2752/7486/4869/5901/23212/84154/54984/705/7015	9
SK-Mel-5	GO:0051402	neuron apoptotic process	67/3566	246/18723	0.00102055	0.0174969	0.0138811	6620/112399/340371/348/10891/4435/7042/7020/28996/2896/6812/4296/65018/2309/3717/23621/23321/6648/2185/80823/7157/4835/64802/6733/840/5170/6477/1522/1499/3329/10280/2149/4170/2597/842/7301/596/11113/7043/2045/2539/2730/3326/1728/409/5621/4208/2876/6495/51804/8851/219699/116986/27242/3725/7068/2668/54532/3672/4929/1051/6376/7015/2558/10763/1745/5803	67
SK-Mel-5	GO:0035633	maintenance of blood-brain barrier	15/3566	35/18723	0.00103008	0.0174969	0.0138811	9414/65267/4155/3908/1756/9069/3688/3915/100506658/84879/9076/7422/83700/5743/3569	15
SK-Mel-5	GO:0097421	liver regeneration	15/3566	35/18723	0.00103008	0.0174969	0.0138811	55959/2737/6143/87178/5111/5774/1956/10419/5727/6217/9076/1374/595/1051/3569	15
SK-Mel-5	GO:0007160	cell-matrix adhesion	64/3566	233/18723	0.00103343	0.0174969	0.0138811	9358/11093/1307/56477/7059/10580/3728/8861/7402/3695/22998/56940/6385/54822/51057/960/4323/1845/2185/6548/3897/51754/3175/79834/5170/7205/9270/59339/604/9647/1499/3688/3685/347/596/1605/3675/8754/6714/3673/9723/182/5829/3693/50509/1021/10420/10855/7422/1946/4088/83700/6422/3672/10516/6376/55612/948/3791/10225/3676/3690/7057/8515	64
SK-Mel-5	GO:0046058	cAMP metabolic process	11/3566	22/18723	0.0010342	0.0174969	0.0138811	108/5144/111/112/10846/107/5141/109/5142/27115/1969	11
SK-Mel-5	GO:0031102	neuron projection regeneration	22/3566	60/18723	0.00103567	0.0174969	0.0138811	9315/6696/3913/2896/65078/5764/5802/3717/9860/706/2281/1495/347/5792/596/1605/349667/83700/9314/10752/22876/3371	22
SK-Mel-5	GO:0033866	nucleoside bisphosphate biosynthetic process	22/3566	60/18723	0.00103567	0.0174969	0.0138811	8034/32/5165/84532/38/5160/9200/55902/23181/1738/5164/25874/2182/5163/51144/5166/2181/11332/9060/2180/1836/54898	22
SK-Mel-5	GO:0034030	ribonucleoside bisphosphate biosynthetic process	22/3566	60/18723	0.00103567	0.0174969	0.0138811	8034/32/5165/84532/38/5160/9200/55902/23181/1738/5164/25874/2182/5163/51144/5166/2181/11332/9060/2180/1836/54898	22
SK-Mel-5	GO:0034033	purine nucleoside bisphosphate biosynthetic process	22/3566	60/18723	0.00103567	0.0174969	0.0138811	8034/32/5165/84532/38/5160/9200/55902/23181/1738/5164/25874/2182/5163/51144/5166/2181/11332/9060/2180/1836/54898	22
SK-Mel-5	GO:0009101	glycoprotein biosynthetic process	83/3566	317/18723	0.00103652	0.0174969	0.0138811	3479/8707/10610/54550/538/55808/2591/659/283417/7423/9528/6487/10347/10090/374378/256281/66008/54790/337876/84752/957/22906/54344/9452/79947/10005/64689/25825/23236/1499/55624/8703/9486/2589/79695/8869/2135/116150/27161/9917/79586/56983/27230/285203/81031/23333/27090/7841/596/10678/5074/56913/2131/7991/10402/23509/727936/1839/92126/79690/6934/26035/51809/2683/160335/10195/26229/27087/6480/22856/9…	83
SK-Mel-5	GO:1903844	regulation of cellular response to transforming growth factor beta stimulus	40/3566	131/18723	0.00103688	0.0174969	0.0138811	9315/79674/4435/4091/28996/2805/858/9839/64081/5465/7157/3175/5170/6868/200734/81031/7043/3675/2280/5654/3326/407975/5468/2200/7049/161742/2201/4088/23089/4092/80139/135228/55612/753/1745/1028/375387/10252/10253/7057	40
SK-Mel-5	GO:0048705	skeletal system morphogenesis	61/3566	220/18723	0.00103895	0.0174969	0.0138811	659/3037/7020/79925/7059/6662/1112/7289/3373/7067/1954/57560/56603/3218/9775/871/3638/57728/2263/3213/4323/7763/2737/4488/9742/649/7048/55553/84314/5916/10265/1499/3200/29985/84159/7043/2131/3198/8692/25902/4208/54475/6495/3219/7046/51804/25976/64651/133522/22856/2201/4088/5156/6422/4041/7480/2690/655/4325/1746/6781	61
SK-Mel-5	GO:1901184	regulation of ERBB signaling pathway	27/3566	79/18723	0.00104286	0.0175155	0.0138959	2241/1845/2537/10825/7879/55704/79651/27131/6868/57732/8527/5774/1956/55658/1839/9052/84058/54206/5782/7039/153090/79628/1950/3672/3092/84632/634	27
SK-Mel-5	GO:0010544	negative regulation of platelet activation	10/3566	19/18723	0.00105638	0.017695	0.0140383	348/18/114897/5592/5580/5270/5156/10019/634/84959	10
SK-Mel-5	GO:0048678	response to axon injury	28/3566	83/18723	0.00107002	0.0178428	0.0141556	2696/9315/6696/3913/2896/65078/5764/5802/3717/9860/3956/706/2281/1495/347/5792/596/1605/1809/3776/349667/2247/4067/83700/9314/10752/22876/3371	28
SK-Mel-5	GO:0003231	cardiac ventricle development	38/3566	123/18723	0.00107255	0.0178428	0.0141556	6331/10512/6092/659/7042/4091/6659/2263/5629/6926/7048/3209/1832/57057/657/3776/9353/2280/4061/182/407975/10848/4208/90/7046/7049/57493/5318/7474/4092/6299/6586/80000/53834/4036/9464/23462/3280	38
SK-Mel-5	GO:0032869	cellular response to insulin stimulus	57/3566	203/18723	0.00107718	0.0178428	0.0141556	27019/2549/8503/29988/10580/64900/143686/2805/4644/3638/858/6844/23175/2241/64397/8660/64506/23433/5305/6548/80339/1176/5579/3667/5164/324/5170/27131/51094/677/896/2822/7532/3480/5471/5580/55971/5166/6714/5468/10603/54206/23516/5770/5167/2888/11031/353/9021/9734/6653/376497/57761/9882/4023/2690/634	57
SK-Mel-5	GO:0071695	anatomical structure maturation	63/3566	229/18723	0.00107825	0.0178428	0.0141556	64100/695/3479/51286/645811/30819/2034/7042/117155/7059/22933/137964/1910/5364/57560/152015/54763/10116/53335/2309/6196/2185/10481/1738/9319/1499/26271/2068/54888/865/201164/11334/23294/596/5991/4882/1605/2131/2539/5047/1050/84456/5468/375790/26256/10507/29842/1026/8851/7422/10365/7474/631/4929/7480/6376/55612/9331/26468/29887/3280/30812/4897	63
SK-Mel-5	GO:0090287	regulation of cellular response to growth factor stimulus	80/3566	304/18723	0.00107948	0.0178428	0.0141556	23213/57556/9315/55959/79674/11156/11167/659/4435/25960/4091/28996/5526/2805/858/9839/64081/5465/10140/7157/3175/5579/4926/2297/5170/3209/6868/1499/26999/493/8322/57057/199731/200734/3678/81031/10251/53918/7043/3675/9353/2280/5654/3326/143282/407975/5468/2247/3592/5770/2200/7049/153090/161742/2201/9508/4088/7474/6653/6422/23089/4092/80139/135228/51232/5046/55612/4036/1634/753/1745/1028/375387/328…	80
SK-Mel-5	GO:0043010	camera-type eye development	84/3566	322/18723	0.00109196	0.0180014	0.0142814	5176/4094/6096/3299/659/7042/7020/28996/3913/1410/25932/6662/7289/26160/1497/57728/8842/4286/23363/5764/5629/51057/5797/4867/56890/4211/7111/2737/9742/22882/4669/7048/10319/5308/79888/5916/1499/2195/86/493/3615/8322/3066/6152/200734/57381/7431/1027/1282/182/10848/2247/84189/4081/43/2200/84879/2823/6909/7046/161742/7422/2201/4088/7474/7068/55714/5156/11023/4041/91156/631/24147/9314/1969/655/7490/1…	84
SK-Mel-5	GO:0033209	tumor necrosis factor-mediated signaling pathway	32/3566	99/18723	0.00112019	0.0183286	0.014541	79092/6850/2621/8996/2309/56928/3717/29965/8764/2185/7157/22900/81858/2874/8717/6868/841/2131/1984/7128/7187/10401/8792/10758/10673/81/8877/7132/7133/2150/55504/330	32
SK-Mel-5	GO:0003279	cardiac septum development	33/3566	103/18723	0.0011206	0.0183286	0.014541	10512/6092/659/7042/4091/6659/2263/55742/5629/7157/6926/7048/3209/57057/2627/657/9353/182/407975/90/6909/7046/7049/57493/7474/4092/6299/6586/53834/4036/655/23462/3280	33
SK-Mel-5	GO:0019395	fatty acid oxidation	33/3566	103/18723	0.0011206	0.0183286	0.014541	10891/35/1666/32/6662/3032/80724/2110/10994/34/84129/8660/38/5465/39/6342/56898/5826/549/3667/10449/10005/30/51/51094/8013/26061/27349/10478/84649/5166/84879/1374	33
SK-Mel-5	GO:0043523	regulation of neuron apoptotic process	59/3566	212/18723	0.00112755	0.0183941	0.014593	6620/112399/340371/348/10891/4435/7042/7020/28996/2896/6812/4296/65018/2309/3717/23621/23321/6648/2185/80823/7157/4835/64802/6733/5170/1522/1499/3329/10280/2149/4170/842/7301/596/7043/2045/2539/2730/3326/1728/409/5621/4208/6495/51804/8851/219699/116986/3725/2668/3672/4929/1051/6376/7015/2558/10763/1745/5803	59
SK-Mel-5	GO:0106106	cold-induced thermogenesis	43/3566	144/18723	0.00113591	0.0184342	0.0146247	6850/10891/2034/2104/3662/5334/1666/7067/6319/23175/5565/3717/85440/5608/23135/115209/5564/324/10062/6778/6868/1778/51094/56034/4857/3480/3566/192111/51393/43/216/2180/133522/7422/3910/2827/7480/3397/79054/5618/1051/2171/948	43
SK-Mel-5	GO:0120161	regulation of cold-induced thermogenesis	43/3566	144/18723	0.00113591	0.0184342	0.0146247	6850/10891/2034/2104/3662/5334/1666/7067/6319/23175/5565/3717/85440/5608/23135/115209/5564/324/10062/6778/6868/1778/51094/56034/4857/3480/3566/192111/51393/43/216/2180/133522/7422/3910/2827/7480/3397/79054/5618/1051/2171/948	43
SK-Mel-5	GO:0032210	regulation of telomere maintenance via telomerase	20/3566	53/18723	0.0011427	0.0184963	0.014674	8658/5570/79618/8550/3178/1499/5073/7013/6950/92345/7203/54552/22948/10575/54984/10694/10574/10576/6714/1736	20
SK-Mel-5	GO:0042698	ovulation cycle	24/3566	68/18723	0.00116694	0.0188399	0.0149466	5176/6092/3037/7042/2113/2099/4987/2309/5764/8648/9612/5608/5111/8322/1956/7301/7043/9353/6714/409/1958/9510/5156/6586	24
SK-Mel-5	GO:0061572	actin filament bundle organization	47/3566	161/18723	0.00117542	0.018928	0.0150165	9788/51466/64780/4233/10580/83543/4082/118/55160/22998/6385/2185/6548/55704/5358/9270/116985/9647/119/253980/85415/5062/9124/5216/7043/5074/1809/221061/55971/6714/5829/3693/7046/3936/29109/4739/23075/85462/4088/56776/6422/6624/3397/6376/5357/55607/1902	47
SK-Mel-5	GO:0060317	cardiac epithelial to mesenchymal transition	14/3566	32/18723	0.00118029	0.0189575	0.0150399	3037/7042/6591/10439/6926/7048/182/90/7046/7049/55273/23462/6615/10252	14
SK-Mel-5	GO:0006164	purine nucleotide biosynthetic process	54/3566	191/18723	0.00120937	0.0193748	0.015371	8034/221264/10891/108/32/111/5165/65018/203/112/9605/84532/38/5465/5160/9200/8382/55902/23181/1738/5164/25874/2182/3614/2023/5163/3615/2618/5198/107/4833/51144/4882/205/5471/10606/8833/5166/2181/471/271/3251/11332/9060/4830/353/2180/5631/5634/100/109/1836/4843/54898	54
SK-Mel-5	GO:0045667	regulation of osteoblast differentiation	40/3566	132/18723	0.00121853	0.0194715	0.0154477	3479/6096/659/4435/4091/6662/54795/2263/6591/10140/537/2737/1499/26271/657/1192/3570/5727/1050/115908/182/9770/5468/4208/2247/90/10507/1021/2201/4088/6422/4041/25819/51232/7480/25937/1051/9464/655/3569	40
SK-Mel-5	GO:0017015	regulation of transforming growth factor beta receptor signaling pathway	39/3566	128/18723	0.00124363	0.0197781	0.0156909	9315/79674/4435/4091/28996/2805/858/9839/64081/5465/7157/3175/5170/6868/200734/81031/7043/3675/2280/5654/3326/407975/5468/2200/7049/161742/2201/4088/23089/4092/80139/135228/55612/753/1028/375387/10252/10253/7057	39
SK-Mel-5	GO:0061005	cell differentiation involved in kidney development	21/3566	57/18723	0.00124404	0.0197781	0.0156909	59/9788/4435/28999/3913/8842/4643/2737/9863/5455/1499/2131/5727/182/4208/2668/6299/25937/7490/3280/3976	21
SK-Mel-5	GO:0030198	extracellular matrix organization	79/3566	301/18723	0.001253	0.0198699	0.0157638	140766/23213/538/25903/55959/170691/3037/11093/7042/2621/1307/2113/1287/3913/1302/57326/7982/6662/83716/256764/871/858/79875/302/4323/4643/4358/649/1515/2068/3688/602/4060/10549/1299/81031/51144/60681/1605/1284/2131/3915/1282/23768/64856/4791/30001/2683/5045/5033/79709/10609/7046/50509/285590/3936/23127/9510/9508/8190/4088/7132/5156/7133/4317/10516/6624/4324/55612/2264/1310/7490/3569/4325/1306/78…	79
SK-Mel-5	GO:0043254	regulation of protein-containing complex assembly	107/3566	428/18723	0.00126977	0.0200848	0.0159343	51673/348/4137/6850/51466/23580/4091/2099/1410/4233/5581/6662/6812/129293/5526/7067/118/80206/65018/11076/29767/2241/11078/10013/133746/57600/90427/21/91663/57763/8775/79969/5756/3642/2185/10382/89795/6711/57704/7111/7157/22900/51185/57580/25999/63908/9641/10497/6709/4926/5864/119/7037/55755/3312/5706/7013/26999/1981/10093/3320/55355/9780/55011/57057/54552/5216/1027/5580/51339/9353/55971/9873/740…	107
SK-Mel-5	GO:0001570	vasculogenesis	27/3566	80/18723	0.00129259	0.0203656	0.016157	3037/4435/4643/9444/7048/3209/11146/1499/677/8322/57057/3685/10052/3726/57178/7049/154796/57493/161742/25976/7422/55273/1969/7490/23462/634/3791	27
SK-Mel-5	GO:0007015	actin filament organization	110/3566	442/18723	0.00129404	0.0203656	0.016157	6387/9886/9788/51466/23580/64780/4233/5581/10580/83543/4082/118/80206/55160/4644/22998/4703/29767/2241/79585/6385/84327/11078/10634/133746/3717/91663/9645/5629/4643/5756/22902/2185/6548/6711/57704/7111/57580/55704/22921/6709/5358/23164/9270/5339/116985/1730/84687/9647/119/1495/26999/55740/2195/10093/253980/30011/85415/5062/9124/596/5216/7043/5074/94134/1809/5580/388/9353/221061/55971/9873/7408/65…	110
SK-Mel-5	GO:0032370	positive regulation of lipid transport	28/3566	84/18723	0.00131764	0.020685	0.0164104	9227/348/6696/10347/114897/8398/5360/21/160518/23461/302/5608/6342/2874/26119/29801/10062/27166/5580/5727/5468/10351/2180/8792/19/80820/9536/154664	28
SK-Mel-5	GO:0042255	ribosome assembly	22/3566	61/18723	0.00133236	0.0208278	0.0165237	6128/6193/6125/6147/3921/57647/6152/4869/23212/27341/6208/84154/708/4839/5822/56342/51388/91695/54475/55299/51154/23246	22
SK-Mel-5	GO:0007173	epidermal growth factor receptor signaling pathway	34/3566	108/18723	0.00133674	0.0208278	0.0165237	9185/2549/6662/2241/1845/2185/2537/10825/7879/55704/5170/79651/27131/6868/57732/8527/5774/1956/55658/1839/9052/6714/9770/84058/54206/5782/7039/153090/51196/1950/3672/3092/84632/634	34
SK-Mel-5	GO:0034440	lipid oxidation	34/3566	108/18723	0.00133674	0.0208278	0.0165237	10891/35/1666/32/6662/3032/80724/2110/10994/34/84129/8660/38/5465/39/6342/56898/5826/549/3667/10449/10005/30/51/51094/8013/347/26061/27349/10478/84649/5166/84879/1374	34
SK-Mel-5	GO:0006892	post-Golgi vesicle-mediated transport	33/3566	104/18723	0.00134606	0.0209208	0.0165975	2060/10133/582/4644/54832/6844/79585/288/23233/6272/6711/10139/23041/1176/10564/9179/6102/23230/9341/8906/583/54536/91461/114879/200312/2181/114815/83871/261729/11031/163882/30845/6653	33
SK-Mel-5	GO:0099054	presynapse assembly	19/3566	50/18723	0.0013665	0.0211739	0.0167983	266727/10160/55737/57502/78999/1855/1981/4038/94030/8927/84189/27445/139065/7474/84631/10082/2239/5789/3556	19
SK-Mel-5	GO:0097305	response to alcohol	68/3566	253/18723	0.00136912	0.0211739	0.0167983	3248/114881/3490/18/94241/999/108/3157/5581/3728/111/2263/112/2309/6916/6648/9400/5465/55929/2185/210/7048/706/808/84687/841/1933/1499/1495/10213/3066/6155/2353/107/5563/2822/1605/80854/641/9353/2539/1728/5727/6678/1026/7046/1978/7049/9076/9962/7804/19/109/3709/10365/2354/6422/1374/595/2904/9314/6586/196/3383/8061/687/57476/3371	68
SK-Mel-5	GO:0050803	regulation of synapse structure or activity	60/3566	218/18723	0.0013797	0.0212849	0.0168863	547/348/6092/7846/266727/115703/26052/6792/80725/5764/5802/10160/80823/65981/55737/78999/3312/1981/4038/7534/203068/22859/1605/94030/575/2045/23768/57463/5621/4208/375790/6678/23613/84189/26037/6495/10507/2823/9456/51804/153090/26115/8851/347902/58489/7804/139065/57622/9423/7474/6405/84631/1000/2904/10082/2239/5789/55607/3556/23266	60
SK-Mel-5	GO:0043062	extracellular structure organization	79/3566	302/18723	0.00138591	0.021328	0.0169205	140766/23213/538/25903/55959/170691/3037/11093/7042/2621/1307/2113/1287/3913/1302/57326/7982/6662/83716/256764/871/858/79875/302/4323/4643/4358/649/1515/2068/3688/602/4060/10549/1299/81031/51144/60681/1605/1284/2131/3915/1282/23768/64856/4791/30001/2683/5045/5033/79709/10609/7046/50509/285590/3936/23127/9510/9508/8190/4088/7132/5156/7133/4317/10516/6624/4324/55612/2264/1310/7490/3569/4325/1306/78…	79
SK-Mel-5	GO:0050954	sensory perception of mechanical stimulus	50/3566	175/18723	0.00140259	0.0215317	0.0170821	6387/64787/776/23349/3815/7020/5172/1302/9311/79955/89797/51473/7442/6591/6323/11078/63895/23621/283310/525/83862/9860/4155/50617/5864/286262/9455/3074/8322/2070/1027/26018/4919/3198/950/3673/84189/2876/6495/5205/5270/7068/140469/54532/6507/3383/2558/4036/1833/10253	50
SK-Mel-5	GO:0051054	positive regulation of DNA metabolic process	56/3566	201/18723	0.00144203	0.0220574	0.0174992	11105/10891/8658/5570/2021/400410/55063/10039/2185/83933/79618/6778/2521/8550/3178/7037/1499/54726/5073/151636/6950/2068/3320/5984/5111/92345/7486/7203/2067/1956/2070/3181/22948/10575/5983/10694/5580/10574/2187/3326/10576/6714/409/1736/2247/83666/79035/26354/4862/4609/56776/306/9314/2264/7490/3569	56
SK-Mel-5	GO:0006086	acetyl-CoA biosynthetic process from pyruvate	7/3566	11/18723	0.00144743	0.0220574	0.0174992	5165/5160/1738/5164/25874/5163/5166	7
SK-Mel-5	GO:0032836	glomerular basement membrane development	7/3566	11/18723	0.00144743	0.0220574	0.0174992	23213/55959/3913/4643/4358/2131/7490	7
SK-Mel-5	GO:0010720	positive regulation of cell development	78/3566	298/18723	0.0014535	0.0220961	0.0175299	6387/443/5176/3815/1638/3398/4137/6092/659/3037/10154/22933/26039/118/1954/5364/6792/5361/11078/23363/5764/91663/22906/8482/537/22902/80823/65981/2737/5365/3897/57580/10494/706/56965/1499/55179/27339/3066/5362/1956/133308/596/5991/1605/708/10419/9353/57463/80005/26230/51393/10507/4067/9294/22891/4311/4739/7422/10221/7804/5270/9423/1959/7133/4092/6376/4036/7052/5789/3569/10675/2119/5803/3280/30812…	78
SK-Mel-5	GO:0003203	endocardial cushion morphogenesis	15/3566	36/18723	0.001458	0.0221106	0.0175414	6092/7042/6662/6591/6926/7048/57057/657/90/6909/7046/55273/655/23462/6615	15
SK-Mel-5	GO:1902893	regulation of pri-miRNA transcription by RNA polymerase II	20/3566	54/18723	0.00149412	0.0224904	0.0178427	7042/4091/2113/6662/2309/5465/7157/2908/2353/657/5468/2247/26354/1958/3725/4088/9314/7015/7490/8061	20
SK-Mel-5	GO:0010875	positive regulation of cholesterol efflux	12/3566	26/18723	0.00149744	0.0224904	0.0178427	348/10347/5360/21/2874/29801/10062/5727/5468/10351/19/80820	12
SK-Mel-5	GO:0050926	regulation of positive chemotaxis	12/3566	26/18723	0.00149744	0.0224904	0.0178427	6387/7423/3603/3673/7857/7422/4088/2150/2152/3791/5228/3576	12
SK-Mel-5	GO:0060037	pharyngeal system development	12/3566	26/18723	0.00149744	0.0224904	0.0178427	659/7042/5362/657/1889/5727/6495/90/7046/51804/655/3280	12
SK-Mel-5	GO:1903034	regulation of response to wounding	48/3566	167/18723	0.00150569	0.02256	0.017898	348/538/18/6696/2896/114897/5581/65078/5592/5764/5802/302/9860/4638/2281/2149/3688/199731/7035/5792/4780/5580/1839/7128/100506658/2247/22875/9076/10855/5270/4088/5156/2161/2150/135228/2152/9314/55612/948/10019/5327/51330/634/58189/22876/301/84959/7057	48
SK-Mel-5	GO:0042177	negative regulation of protein catabolic process	37/3566	121/18723	0.00152104	0.0226948	0.0180049	2272/84074/28996/22933/83547/23077/7077/5476/302/80279/210/9860/8724/65992/4085/55353/6125/6201/51377/5774/1956/1457/575/3326/4130/5045/153090/7076/4983/116986/5270/4088/4248/56776/27074/4843/7078	37
SK-Mel-5	GO:0035924	cellular response to vascular endothelial growth factor stimulus	25/3566	73/18723	0.00152195	0.0226948	0.0180049	57556/11156/2549/25960/7423/2619/3315/9270/493/116150/199731/1960/3592/153090/7422/9508/8877/5156/3164/5606/1634/3791/301/5228/10253	25
SK-Mel-5	GO:0010675	regulation of cellular carbohydrate metabolic process	43/3566	146/18723	0.00153462	0.0228292	0.0181115	3479/4485/10891/90673/114897/5581/32/10580/5165/34/8660/1407/9852/5465/2185/5208/7157/10499/3667/5164/57486/51094/2648/5163/10447/2822/84649/950/5166/6714/90007/84912/5167/5366/3795/5028/3487/85414/54541/8445/4837/5507/7262	43
SK-Mel-5	GO:0030512	negative regulation of transforming growth factor beta receptor signaling pathway	27/3566	81/18723	0.00159234	0.0236316	0.0187481	79674/4091/858/64081/5465/7157/3175/5170/6868/200734/81031/7043/2280/5654/407975/5468/2200/7049/161742/2201/23089/4092/135228/753/375387/10252/10253	27
SK-Mel-5	GO:0016311	dephosphorylation	104/3566	417/18723	0.00160011	0.0236907	0.018795	127495/11156/128853/64759/7042/90673/6609/64900/152926/54893/11099/5526/64077/55258/65018/10903/23175/56940/5802/3717/3628/5797/138639/151742/1845/80279/1408/131870/5208/56623/5723/84064/55313/1850/79178/2281/9863/57460/7803/3633/808/29085/51231/84687/5793/5794/9647/8073/51657/5520/5209/5519/5475/221294/5774/2070/5792/2822/5496/54704/596/57718/5580/1843/2280/3326/1827/6714/3673/57181/5533/4208/99…	104
SK-Mel-5	GO:0045786	negative regulation of cell cycle	97/3566	385/18723	0.00160695	0.0237358	0.0188308	3248/79858/6659/10263/8658/1112/146691/5526/2619/1031/25959/10457/7077/55450/10116/1017/6196/5629/1407/56890/64859/84861/5883/80279/84936/3275/197342/7157/55743/323/79027/324/604/146956/9319/55755/163859/1499/138151/26271/677/4085/7013/10614/8451/27339/2648/864/4998/79960/5347/10527/440275/3843/2273/54888/4869/84444/5774/1956/22809/990/54962/596/4882/1027/54984/6300/7023/55159/641/51339/388/1843/…	97
SK-Mel-5	GO:0060021	roof of mouth development	28/3566	85/18723	0.00161329	0.0237731	0.0188604	7042/7020/1302/26160/3638/54796/51057/2737/6926/7048/84314/84159/657/91461/7043/9242/6909/7046/7049/25976/64651/7474/5156/11023/9464/6615/51176/84695	28
SK-Mel-5	GO:2001237	negative regulation of extrinsic apoptotic signaling pathway	31/3566	97/18723	0.00162967	0.023867	0.0189349	3479/8996/6591/5607/2537/5598/10197/1495/55179/4170/3685/2070/57630/596/2730/7128/6714/6934/2876/90/7857/7046/9181/219699/2668/3655/85450/6376/3383/7015/7057	31
SK-Mel-5	GO:0033273	response to vitamin	30/3566	93/18723	0.00163112	0.023867	0.0189349	9227/6696/2621/3157/23530/25959/56603/6591/5764/7299/6648/210/5292/706/2281/8678/1956/3673/6678/100/590/6422/595/5743/8942/655/7421/1543/3371/6781	30
SK-Mel-5	GO:1901796	regulation of signal transduction by p53 class mediator	30/3566	93/18723	0.00163112	0.023867	0.0189349	28996/754/6591/960/80279/5608/7157/8550/9099/10614/6125/200734/4869/23212/6201/84154/596/4839/10419/1984/6446/161742/23246/9521/1263/5366/8444/9891/8445/6615	30
SK-Mel-5	GO:0035988	chondrocyte proliferation	11/3566	23/18723	0.00164326	0.0239885	0.0190313	659/57326/6662/4323/2804/2131/4092/4325/51176/8091/6781	11
SK-Mel-5	GO:0048736	appendage development	49/3566	172/18723	0.00166349	0.024171	0.019176	10512/659/7042/6659/7020/6662/7289/26160/1954/3899/57560/79412/56603/57728/2263/51057/2737/9742/140467/6926/5308/5564/3209/84314/5916/1499/29985/2648/4038/3066/5362/657/91461/2131/3239/1889/5727/84133/221833/6909/2201/341640/7474/4041/3655/6299/9464/655/51176	49
SK-Mel-5	GO:0060173	limb development	49/3566	172/18723	0.00166349	0.024171	0.019176	10512/659/7042/6659/7020/6662/7289/26160/1954/3899/57560/79412/56603/57728/2263/51057/2737/9742/140467/6926/5308/5564/3209/84314/5916/1499/29985/2648/4038/3066/5362/657/91461/2131/3239/1889/5727/84133/221833/6909/2201/341640/7474/4041/3655/6299/9464/655/51176	49
SK-Mel-5	GO:0006631	fatty acid metabolic process	98/3566	390/18723	0.00166791	0.0241789	0.0191823	7306/3248/5354/10891/51084/2052/35/1666/32/64900/6662/2678/137964/80221/5165/55258/3032/283927/80724/2110/3638/10994/6319/57678/23175/36/34/5565/84532/84129/8660/6916/525/84869/50640/38/145482/5465/6307/9200/51099/427/80339/39/9444/22949/6342/56898/5826/549/55902/5564/3667/10449/1738/5164/10005/10062/30/51/10613/58526/51094/2182/8013/5163/134526/26061/5563/51144/27349/10478/84649/5166/2181/5468/1…	98
SK-Mel-5	GO:0045229	external encapsulating structure organization	79/3566	304/18723	0.00168978	0.0244015	0.0193589	140766/23213/538/25903/55959/170691/3037/11093/7042/2621/1307/2113/1287/3913/1302/57326/7982/6662/83716/256764/871/858/79875/302/4323/4643/4358/649/1515/2068/3688/602/4060/10549/1299/81031/51144/60681/1605/1284/2131/3915/1282/23768/64856/4791/30001/2683/5045/5033/79709/10609/7046/50509/285590/3936/23127/9510/9508/8190/4088/7132/5156/7133/4317/10516/6624/4324/55612/2264/1310/7490/3569/4325/1306/78…	79
SK-Mel-5	GO:1904031	positive regulation of cyclin-dependent protein kinase activity	14/3566	33/18723	0.00169416	0.0244015	0.0193589	5629/904/6868/1956/896/990/1027/1164/3326/6714/219736/1026/8851/595	14
SK-Mel-5	GO:0009116	nucleoside metabolic process	22/3566	62/18723	0.00169889	0.0244015	0.0193589	140733/54963/200316/140564/8382/28992/9582/7378/4833/7372/262/5471/191/471/3251/22875/353/5631/5634/4860/100/4907	22
SK-Mel-5	GO:0032835	glomerulus development	22/3566	62/18723	0.00169889	0.0244015	0.0193589	23213/59/55959/9788/28999/3913/8842/4643/4358/9863/596/2131/3570/182/4208/1958/5156/51196/25937/655/7490/3280	22
SK-Mel-5	GO:0002467	germinal center formation	8/3566	14/18723	0.00171523	0.0244674	0.0194112	604/6868/602/7128/4791/4208/100/10673	8
SK-Mel-5	GO:0010421	hydrogen peroxide-mediated programmed cell death	8/3566	14/18723	0.00171523	0.0244674	0.0194112	4233/2021/65018/2309/10013/10494/10131/5074	8
SK-Mel-5	GO:1990173	protein localization to nucleoplasm	8/3566	14/18723	0.00171523	0.0244674	0.0194112	6950/7203/22948/10575/10694/10574/10576/1736	8
SK-Mel-5	GO:0030902	hindbrain development	44/3566	151/18723	0.00172129	0.024498	0.0194354	51286/538/6331/18/10891/9935/4967/25809/5013/8861/8925/5764/5802/5629/3213/8648/7157/57502/4669/1499/10978/8624/2648/3688/8322/2618/5362/22809/596/3746/471/2247/388610/22891/8851/4983/5270/54910/1959/340719/1950/655/51176/3280	44
SK-Mel-5	GO:1902176	negative regulation of oxidative stress-induced intrinsic apoptotic signaling pathway	10/3566	20/18723	0.00175403	0.0249072	0.0197601	65018/8996/3315/6648/8382/5598/10131/4780/27429/2876	10
SK-Mel-5	GO:0071356	cellular response to tumor necrosis factor	62/3566	229/18723	0.00179352	0.0253748	0.0201311	79092/6850/10891/3037/11093/2621/3373/1244/7442/8996/2309/56928/3717/29965/8764/2185/427/7157/22900/81858/2874/8717/6868/841/677/2648/2634/4780/2633/2131/1984/7128/1050/100506658/8692/965/7187/8531/4217/8372/10401/9181/153090/8792/9076/10758/27242/10673/7538/81/8877/10365/7132/6422/7133/2150/55504/6376/3383/330/7057/3576	62
SK-Mel-5	GO:2000811	negative regulation of anoikis	9/3566	17/18723	0.00179508	0.0253748	0.0201311	7088/6591/3688/4170/51651/3678/596/5166/6714	9
SK-Mel-5	GO:0034284	response to monosaccharide	61/3566	225/18723	0.00187529	0.0263892	0.0209358	5176/2696/10891/2621/6659/26137/5581/2752/8398/111/5165/2021/6844/54795/57678/55450/2309/84327/8660/387597/6648/2185/3956/9324/5208/1515/7048/2281/10497/2044/25874/29085/9024/8891/55011/5563/2822/133308/1027/3480/3939/2730/3673/6546/6934/6678/8892/23516/4830/415116/1958/1946/3795/8938/4041/4023/3383/5743/130399/55107/7057	61
SK-Mel-5	GO:0050769	positive regulation of neurogenesis	61/3566	225/18723	0.00187529	0.0263892	0.0209358	6387/443/5176/3815/1638/3398/4137/6092/659/10154/26039/1954/5364/6792/5361/23363/5764/22906/8482/22902/80823/65981/2737/5365/3897/10494/706/56965/1499/55179/27339/3066/5362/1956/1605/10419/9353/57463/26230/51393/10507/4067/22891/4311/7422/7804/5270/9423/1959/7133/6376/4036/7052/5789/3569/2119/5803/3280/30812/3976/10215	61
SK-Mel-5	GO:0006635	fatty acid beta-oxidation	25/3566	74/18723	0.00188897	0.0264875	0.0210138	35/1666/32/3032/80724/2110/34/84129/8660/38/5465/39/6342/56898/5826/549/3667/10449/10005/30/51/27349/10478/84879/1374	25
SK-Mel-5	GO:1905954	positive regulation of lipid localization	34/3566	110/18723	0.00189075	0.0264875	0.0210138	9227/348/6696/10347/114897/32/8398/5360/21/160518/23461/302/5608/6342/2874/26119/9641/29801/10062/29923/27166/5580/5727/123/5468/10351/2180/8792/19/80820/4023/9536/948/154664	34
SK-Mel-5	GO:0006090	pyruvate metabolic process	33/3566	106/18723	0.00191743	0.0268011	0.0212626	80201/3479/10891/26137/112817/4967/5091/230/5165/55753/63826/957/5465/5160/5208/5213/5236/1738/5164/25874/5230/2023/83440/8013/2597/5163/5563/4199/3939/5166/4200/54541/3099	33
SK-Mel-5	GO:0043154	negative regulation of cysteine-type endopeptidase activity involved in apoptotic process	26/3566	78/18723	0.00192525	0.0268504	0.0213017	2621/64780/1410/8996/5896/960/5607/2537/1718/5062/55011/57630/1457/25816/6197/6714/409/54475/2876/7422/3164/27074/9314/5743/330/7057	26
SK-Mel-5	GO:0061614	pri-miRNA transcription by RNA polymerase II	20/3566	55/18723	0.00193332	0.0269029	0.0213434	7042/4091/2113/6662/2309/5465/7157/2908/2353/657/5468/2247/26354/1958/3725/4088/9314/7015/7490/8061	20
SK-Mel-5	GO:0006221	pyrimidine nucleotide biosynthetic process	13/3566	30/18723	0.0019543	0.0271344	0.021527	54963/83549/8382/7378/9519/4833/7372/129607/1503/1723/4830/5631/7371	13
SK-Mel-5	GO:0034109	homotypic cell-cell adhesion	29/3566	90/18723	0.0019694	0.0272833	0.0216452	18/6850/114897/84466/6812/3728/5592/3315/3717/288/9414/3956/5912/1832/1829/7301/23173/5580/1192/4067/5270/5318/5156/80139/10019/3569/634/84959/3690	29
SK-Mel-5	GO:0002573	myeloid leukocyte differentiation	57/3566	208/18723	0.00199014	0.0275076	0.0218231	3815/3398/9935/3662/9644/4286/302/22904/537/8544/6988/7048/7037/841/1499/27086/677/8451/2353/133308/814/3428/3930/2739/3726/6714/1050/84456/7071/9770/5468/4254/2200/4067/4830/10401/8792/1021/4055/4609/133522/7422/10221/3725/6422/2150/135228/55509/1051/1969/29887/634/51176/375387/84959/3976/54997	57
SK-Mel-5	GO:0000723	telomere maintenance	39/3566	131/18723	0.00199439	0.0275076	0.0218231	8658/5570/10039/7011/79618/8550/3178/1499/5073/7013/6950/85456/3320/5111/92345/7486/7203/54552/2067/5889/3181/898/22948/51002/10575/54984/10694/641/10574/3326/10576/6714/1736/55651/79035/26354/22891/4609/7015	39
SK-Mel-5	GO:0006623	protein targeting to vacuole	15/3566	37/18723	0.00202517	0.0278706	0.0221111	55187/54832/8031/6272/7879/64089/9179/23230/9765/27072/3312/950/200312/1191/6653	15
SK-Mel-5	GO:0072593	reactive oxygen species metabolic process	64/3566	239/18723	0.00204706	0.0281099	0.0223009	538/4137/6850/5873/7020/9644/1410/23530/22933/5165/65018/10901/23408/1497/2309/10013/79400/9973/6648/5465/2185/2537/7157/4835/4358/7048/57580/706/5547/51/3329/8678/5052/10549/2643/1956/10131/11334/596/4780/575/5580/9588/2539/5166/1728/2876/384/1026/285590/5366/4317/2150/10516/54541/9263/655/948/3099/4843/375387/7837/1543/7057	64
SK-Mel-5	GO:0048015	phosphatidylinositol-mediated signaling	50/3566	178/18723	0.00208066	0.0285086	0.0226173	113791/3479/3815/7042/5334/4935/6662/22933/5364/25827/4150/3717/957/2064/56623/5863/5297/3667/375133/728233/5298/23236/677/2149/8678/56034/1956/7301/3480/4919/708/6714/222950/2247/10507/57605/153090/10125/219699/23413/5270/5156/51196/1950/2150/9314/1634/634/3791/22876	50
SK-Mel-5	GO:0050821	protein stabilization	53/3566	191/18723	0.00208951	0.0285674	0.0226639	3479/8863/10891/6659/1410/2896/6812/124997/65018/112770/84327/55742/7157/5292/23515/1857/125150/902/1855/3329/6950/9099/64747/6125/3320/2597/7203/118611/4869/6201/1022/5216/22948/10575/80155/9531/10694/5580/483/10574/3326/10576/10437/56926/9770/1191/23560/9532/4088/4092/3092/7480/54997	53
SK-Mel-5	GO:1904589	regulation of protein import	22/3566	63/18723	0.00214789	0.0293014	0.0232462	999/3728/3717/5569/55929/2737/57506/3312/9141/3843/5901/347/9531/5580/3326/8692/7545/9221/4088/55612/5743/948	22
SK-Mel-5	GO:1990845	adaptive thermogenesis	45/3566	157/18723	0.00220109	0.0299616	0.02377	6850/10891/2034/2104/3662/5334/1666/7067/6319/23175/7442/5565/3717/85440/5608/23135/115209/5564/324/10062/6778/6868/1778/51094/56034/4857/3480/3566/192111/51393/43/216/2180/133522/7422/3910/6653/2827/7480/3397/79054/5618/1051/2171/948	45
SK-Mel-5	GO:0008654	phospholipid biosynthetic process	67/3566	253/18723	0.00220705	0.0299775	0.0237826	80235/8503/9306/3157/56895/5833/23682/8398/137964/4597/26751/57678/23175/9517/1119/93183/3628/9091/54344/93210/129303/8526/5305/51099/55224/80339/56623/63874/9600/65258/5297/4598/375133/54872/79947/79888/728233/5298/57515/55326/80271/3074/9791/116150/57217/8527/5283/84668/2181/5359/51477/10351/2247/253558/43/84879/57605/8835/9021/256987/376497/166929/8871/2171/84803/1608/22876	67
SK-Mel-5	GO:0072665	protein localization to vacuole	23/3566	67/18723	0.00222552	0.0301259	0.0239004	55187/54832/23677/8031/112770/6272/51160/7879/23334/64089/9179/23230/9765/27072/3312/64747/2633/950/200312/79589/7128/1191/6653	23
SK-Mel-5	GO:0000027	ribosomal large subunit assembly	12/3566	27/18723	0.00223244	0.0301259	0.0239004	6128/6125/6147/6152/23212/84154/4839/56342/54475/55299/51154/23246	12
SK-Mel-5	GO:0003401	axis elongation	12/3566	27/18723	0.00223244	0.0301259	0.0239004	2099/6662/2263/9863/3239/6495/51804/7474/6422/10252/10253/3371	12
SK-Mel-5	GO:0003158	endothelium development	40/3566	136/18723	0.00225272	0.0303341	0.0240655	11167/659/2889/4233/25932/5144/118/5764/5802/91663/5629/9414/23135/3209/23236/1499/27086/26084/388/182/1903/2876/90/9294/57493/9076/3687/7422/7132/6935/2150/3397/55273/3383/23462/634/3791/1306/81575/6781	40
SK-Mel-5	GO:0031647	regulation of protein stability	77/3566	298/18723	0.00226022	0.030347	0.0240757	3479/8863/10891/4047/6659/1410/2896/6812/124997/65018/5476/112770/84327/10013/55742/54344/10169/29116/55737/7157/5292/11236/55743/23515/1857/125150/6477/65992/902/1855/3329/3312/6950/9099/64747/2648/6125/3320/5347/2597/7203/54552/118611/4869/6201/1022/596/5216/22948/10575/80155/9531/54984/10694/5580/483/10574/51339/3326/79589/10576/6714/10437/56926/5621/9770/1191/23560/9532/440193/283514/4088/409…	77
SK-Mel-5	GO:0045664	regulation of neuron differentiation	54/3566	196/18723	0.00226339	0.030347	0.0240757	6387/54845/9315/3398/9745/6662/9638/124936/1910/7077/5909/53335/2309/5629/8648/4211/80279/2737/567/22882/55000/55906/604/55755/1981/27339/440275/23531/7532/596/79191/1977/182/4208/85446/1840/6495/53637/8835/238/9181/8851/85458/6422/6935/655/1745/23462/2119/3280/30812/1746/10215/4897	54
SK-Mel-5	GO:0021761	limbic system development	33/3566	107/18723	0.00227432	0.0304282	0.0241401	63827/2113/166614/4967/9638/2263/5802/5629/8648/79969/2737/23135/6926/2145/2044/583/84687/2258/8891/493/84879/4830/238/8851/1021/7804/306/10371/10501/1745/51176/5454/1746	33
SK-Mel-5	GO:0050818	regulation of coagulation	24/3566	71/18723	0.00228536	0.0305105	0.0242055	348/18/114897/5592/302/308/2149/7035/4780/5580/22875/10855/5270/5156/2161/10544/2150/2152/948/10019/5327/634/84959/7057	24
SK-Mel-5	GO:0043087	regulation of GTPase activity	88/3566	348/18723	0.00229225	0.0305373	0.0242267	10154/84253/25780/2889/79090/57326/4233/93627/65078/115704/5364/83478/23677/6792/858/5909/55531/5592/55785/163486/5361/1856/6000/29/10297/27352/2064/125058/2185/85440/5365/139818/54885/57580/1857/8853/2044/128239/9905/9270/116985/79735/50861/604/1965/2149/3688/23329/57533/7410/10276/1123/5362/26084/55854/94134/23076/409/1124/375790/26230/26037/5910/10507/83874/23108/11138/154796/153090/55619/1012…	88
SK-Mel-5	GO:0007569	cell aging	39/3566	132/18723	0.00231975	0.0308162	0.024448	5549/3398/4215/1017/5608/567/7157/4335/6926/23515/80317/8550/604/87178/26271/10000/7486/2067/4869/657/596/1027/5074/5580/26156/3159/384/4217/57178/6909/1026/4311/1021/9521/9891/5606/3383/7015/8091	39
SK-Mel-5	GO:0010907	positive regulation of glucose metabolic process	16/3566	41/18723	0.00232305	0.0308162	0.024448	3479/10891/90673/10580/8660/9852/5465/3667/2648/2822/84649/6714/5366/85414/8445/4837	16
SK-Mel-5	GO:0060348	bone development	56/3566	205/18723	0.00233838	0.0309538	0.0245571	3479/645811/23213/3815/55959/659/3037/7020/7059/6662/1112/7289/26160/1954/5364/57560/56603/871/3638/2263/302/4323/4211/537/5305/5608/2737/4488/7157/7048/5308/80263/5358/84314/5916/27086/2648/56034/133308/4882/7043/2131/6714/4208/10507/2200/285590/22856/4041/2690/7052/10019/29887/4325/1833/6781	56
SK-Mel-5	GO:0007044	cell-substrate junction assembly	30/3566	95/18723	0.00235901	0.0311149	0.024685	1307/10580/8861/22998/56940/6385/51057/4323/1845/2185/6548/79834/5170/7205/9270/5339/9647/347/596/3915/6714/3673/10420/7422/1946/4088/6422/3655/3791/7057	30
SK-Mel-5	GO:0019932	second-messenger-mediated signaling	80/3566	312/18723	0.00236051	0.0311149	0.024685	695/3479/2696/348/23551/4137/6850/83988/108/4935/6662/4987/5144/1910/57192/54795/51643/5592/9454/219931/64784/2494/2185/6548/10846/2281/2044/5598/5164/808/5170/1756/84687/9455/10134/493/8527/107/1956/55784/4882/22859/2633/5141/114804/51655/1827/1131/5533/5621/6546/3708/23576/27445/57211/29995/6543/9722/5032/7422/100/3709/8877/79772/27115/51196/2904/55273/79054/196/933/8445/948/55607/4843/3791/110…	80
SK-Mel-5	GO:0070304	positive regulation of stress-activated protein kinase signaling cascade	38/3566	128/18723	0.00238598	0.0313844	0.0248987	222166/128853/7042/28996/4296/8324/4215/56940/2185/344558/10494/9867/90441/23236/8312/57630/9770/7187/3276/7164/4217/768211/4067/4616/285613/153090/10125/4055/7422/8877/54910/7474/4317/2150/10371/23043/55504/9464	38
SK-Mel-5	GO:0006403	RNA localization	55/3566	201/18723	0.00244265	0.0320624	0.0254367	130132/8658/9775/9444/7048/10482/3800/3178/11260/87178/677/5073/9804/7013/6950/9939/3267/92345/55011/10189/84321/7203/54888/4869/5901/9631/25909/3181/22948/29107/6741/10575/10856/10644/10694/6432/65083/5433/10574/55706/23404/1984/10576/2091/4927/1736/8607/55651/51602/143244/81929/129401/10762/7538/9908	55
SK-Mel-5	GO:0051058	negative regulation of small GTPase mediated signal transduction	20/3566	56/18723	0.00247687	0.0324434	0.0257389	7042/4233/83478/7077/8216/50861/604/3688/253980/10251/3675/94134/9353/153090/57493/202243/8437/10252/10253/81848	20
SK-Mel-5	GO:0051962	positive regulation of nervous system development	71/3566	272/18723	0.00248251	0.0324492	0.0257435	6387/443/5176/3815/1638/3398/4137/6092/659/10154/26039/1954/5364/6792/5361/23363/5764/22906/8482/22902/80823/65981/2737/5365/3897/10494/706/56965/1499/55179/27339/3066/5362/1956/1605/94030/575/10419/9353/23768/57463/375790/26230/84189/51393/10507/4067/22891/4311/347902/7422/7804/139065/5270/9423/84631/1959/7133/6376/4036/7052/5789/3556/3569/23266/2119/5803/3280/30812/3976/10215	71
SK-Mel-5	GO:0001783	B cell apoptotic process	11/3566	24/18723	0.00251598	0.032818	0.0260361	695/8660/604/27086/26155/57181/407975/4067/10758/100/27242	11
SK-Mel-5	GO:0021782	glial cell development	35/3566	116/18723	0.00257501	0.0334937	0.0265722	443/8506/5354/4137/6659/3913/2896/5453/22933/3766/11076/79885/10397/83933/745/10319/5339/25825/2068/8891/1956/7431/1605/4919/1191/8892/57211/4067/1021/79628/9331/3569/10675/5454/375387	35
SK-Mel-5	GO:0003197	endocardial cushion development	17/3566	45/18723	0.00258386	0.0334937	0.0265722	6092/659/7042/6662/6591/6926/7048/57057/657/182/90/6909/7046/55273/655/23462/6615	17
SK-Mel-5	GO:0071364	cellular response to epidermal growth factor stimulus	17/3566	45/18723	0.00258386	0.0334937	0.0265722	6662/6591/56940/1845/2064/5170/84687/4176/677/8678/1956/4691/54206/5782/153090/7538/3397	17
SK-Mel-5	GO:0007156	homophilic cell adhesion via plasma membrane adhesion molecules	47/3566	167/18723	0.00266343	0.0344537	0.0273338	1005/27255/1010/999/6092/56121/7216/56126/79633/56127/56125/56108/56122/56133/56103/23363/56123/5797/56138/1008/56111/5365/3897/57717/2195/3688/1829/5101/91624/28513/57463/133418/1825/23022/10205/26025/64881/347902/57863/5099/83872/5097/5817/55714/91156/1000/634	47
SK-Mel-5	GO:0034446	substrate adhesion-dependent cell spreading	33/3566	108/18723	0.00268686	0.0345898	0.0274418	3037/3913/8324/3695/2241/11078/80725/91663/55742/3911/10319/57580/9341/79834/9270/8322/3685/9404/7301/2633/708/3915/6714/80005/55698/5829/4739/1946/81/10675/3676/3690/81848	33
SK-Mel-5	GO:0003007	heart morphogenesis	65/3566	246/18723	0.00269345	0.0345898	0.0274418	10512/6092/659/3037/7042/4091/6659/129880/6662/26160/1954/83852/2548/2263/6591/1856/9645/55742/5629/10439/7157/5292/6926/7048/5308/1832/1499/57057/2627/657/2131/9353/2280/23768/5727/51676/4061/182/407975/10848/4208/6495/57211/90/57178/6909/7046/7049/57493/7422/9510/4088/5318/7474/4092/6586/55273/53834/4036/9464/655/23462/6615/3280/10252	65
SK-Mel-5	GO:0001885	endothelial cell development	22/3566	64/18723	0.00269348	0.0345898	0.0274418	2889/4233/25932/5144/118/5802/91663/9414/3209/23236/26084/1903/2876/9294/57493/9076/7422/7132/2150/3383/1306/6781	22
SK-Mel-5	GO:1901653	cellular response to peptide	90/3566	359/18723	0.0026961	0.0345898	0.0274418	3479/478/27019/2549/8503/28999/29988/10580/64900/143686/2805/4644/3638/10768/858/6844/23175/112/2241/2309/64397/8660/64506/3717/23621/23433/5305/6548/80339/7157/1176/5579/3667/23641/5164/324/5170/6778/84687/27131/51094/677/8013/896/2822/7532/7431/990/3480/4780/5471/5580/55971/5166/6714/7071/5621/5468/10603/54206/5829/23516/5770/5167/2200/4067/2888/11031/8835/353/9181/9021/9734/10365/6653/376497/3…	90
SK-Mel-5	GO:2001234	negative regulation of apoptotic signaling pathway	60/3566	224/18723	0.00274542	0.0351503	0.0278865	6387/3479/754/65018/8996/3315/4150/6591/960/6648/5607/2537/10625/4335/8382/10449/5598/10197/1499/1495/55179/2023/4170/55011/3685/2070/57630/27166/10131/596/1457/4780/2730/220042/7128/6714/26155/409/1191/6934/8531/27429/54475/2876/90/5770/7857/7046/9181/219699/2668/3655/4929/85450/6376/3383/7015/5743/6615/7057	60
SK-Mel-5	GO:0006664	glycolipid metabolic process	31/3566	100/18723	0.00277997	0.0353672	0.0280585	8707/3815/80235/6609/6487/2760/3073/93183/9091/54344/93210/57704/10825/65258/54872/7357/8703/3074/8869/51097/5283/2822/27090/10402/5580/2581/79690/2583/6482/9331/6489	31
SK-Mel-5	GO:0003177	pulmonary valve development	10/3566	21/18723	0.00278132	0.0353672	0.0280585	6092/659/7042/4091/57057/9353/182/7132/7133/23462	10
SK-Mel-5	GO:0030201	heparan sulfate proteoglycan metabolic process	13/3566	31/18723	0.00278537	0.0353672	0.0280585	23213/55959/6448/1499/2135/2131/6934/26035/26229/10855/90161/92370/55790	13
SK-Mel-5	GO:0036474	cell death in response to hydrogen peroxide	13/3566	31/18723	0.00278537	0.0353672	0.0280585	4233/2021/65018/2309/10013/10494/10280/5831/8013/10131/4780/5074/2861	13
SK-Mel-5	GO:0010634	positive regulation of epithelial cell migration	49/3566	176/18723	0.00279066	0.0353672	0.0280585	659/3037/25960/7042/2113/2896/4233/5581/6662/3373/4215/3315/10013/5629/2185/7048/5170/9270/9647/6868/27086/10000/116150/57381/2252/2822/5216/4780/3675/388/8754/1839/6714/3673/80005/2247/6678/7422/9734/7474/306/1950/5606/54566/5743/3791/301/3690/7057	49
SK-Mel-5	GO:0018198	peptidyl-cysteine modification	18/3566	49/18723	0.00280666	0.0354263	0.0281054	283576/79844/29800/6640/135112/25999/29801/1756/9545/3145/2597/493/79683/79929/253832/9722/4843/401647	18
SK-Mel-5	GO:0046580	negative regulation of Ras protein signal transduction	18/3566	49/18723	0.00280666	0.0354263	0.0281054	7042/4233/83478/7077/8216/50861/604/3688/253980/10251/3675/153090/57493/202243/8437/10252/10253/81848	18
SK-Mel-5	GO:0003012	muscle system process	110/3566	452/18723	0.00284779	0.0358697	0.0284572	3479/23213/776/30819/3815/10324/6331/59/90523/55959/18/84676/10891/7222/7423/6535/28999/1410/1113/487/1837/8082/3728/8398/124093/5144/1910/2548/7402/54795/7442/8996/29767/5592/2309/6323/219931/5465/4660/5756/6548/5608/7111/6640/4638/23704/6926/323/2281/808/1756/23125/2258/1832/2593/2149/8678/2023/1829/8013/493/3066/57057/8912/9631/2627/10052/1605/2539/2257/1131/3673/80005/114907/407975/10848/6546…	110
SK-Mel-5	GO:0072028	nephron morphogenesis	25/3566	76/18723	0.00285327	0.0358697	0.0284572	4435/6662/26249/3911/2737/2297/1499/596/79191/5727/2247/6495/55083/51804/4609/7422/2668/6299/80000/655/7490/3280/30812/65266/3976	25
SK-Mel-5	GO:0009791	post-embryonic development	26/3566	80/18723	0.00287116	0.036022	0.028578	10512/2263/34/4643/55224/23334/23515/5864/2068/27161/57003/2067/84159/27230/22809/596/10848/3708/2200/7046/57493/25976/64651/7422/4929/9314	26
SK-Mel-5	GO:0002903	negative regulation of B cell apoptotic process	7/3566	12/18723	0.00290342	0.0361366	0.0286689	8660/604/27086/26155/57181/407975/100	7
SK-Mel-5	GO:0043248	proteasome assembly	7/3566	12/18723	0.00290342	0.0361366	0.0286689	8624/11047/5717/389362/51371/51633/84262	7
SK-Mel-5	GO:1901298	regulation of hydrogen peroxide-mediated programmed cell death	7/3566	12/18723	0.00290342	0.0361366	0.0286689	4233/2021/65018/2309/10013/10131/5074	7
SK-Mel-5	GO:1902287	semaphorin-plexin signaling pathway involved in axon guidance	7/3566	12/18723	0.00290342	0.0361366	0.0286689	10154/5364/5361/5365/5362/6405/10371	7
SK-Mel-5	GO:0030111	regulation of Wnt signaling pathway	83/3566	328/18723	0.00293307	0.0363782	0.0288606	23213/1501/348/55959/219287/4435/9679/25960/6659/144165/28999/57326/4163/8658/6662/129293/3728/25776/57560/7088/27303/8324/27123/51473/54795/2263/2309/9839/6591/84327/147906/10297/83439/7089/10927/81847/65981/2737/9580/8724/324/337867/79960/4038/8322/151195/83786/8312/1956/7091/1457/10856/3675/51339/7128/6714/115908/8607/440193/6934/2247/84133/54475/85474/153090/1958/10146/85458/23500/4088/7474/3…	83
SK-Mel-5	GO:0001704	formation of primary germ layer	36/3566	121/18723	0.00293477	0.0363782	0.0288606	659/1294/8324/1291/3909/2263/8320/4323/23135/1499/3688/57057/3678/3685/2627/657/1284/3675/1843/3673/90/3693/4088/7474/1847/4317/9314/4324/1969/655/6615/51176/3676/3690/8091/1846	36
SK-Mel-5	GO:0032535	regulation of cellular component size	95/3566	383/18723	0.00294277	0.0363782	0.0288606	6387/5865/57556/348/538/10512/4137/6696/51466/659/23580/23105/1185/5581/50809/65078/83547/393/118/80206/1954/6792/4703/29767/2241/11078/64798/80031/133746/5802/91663/8482/5756/22902/2185/6711/57704/7111/10439/9990/65267/3897/57580/6709/128239/2258/119/114908/5916/26999/10000/10093/7410/6560/4869/5216/5580/2045/9353/55971/9873/7408/3326/9723/51393/10507/23108/10505/23645/23406/8851/10435/6840/3434…	95
SK-Mel-5	GO:0050679	positive regulation of epithelial cell proliferation	56/3566	207/18723	0.00294612	0.0363782	0.0288606	6387/3479/538/6331/659/3037/7423/2896/6662/2752/3373/8324/858/2263/5764/5629/2064/5607/5365/128239/5170/1893/6868/1499/10000/8013/1956/657/2252/3915/1960/5654/7128/6934/2247/219736/2683/7039/4830/7857/7046/9076/4609/7422/7474/6422/3164/1950/80139/595/2152/3397/3791/3676/5228/3690	56
SK-Mel-5	GO:1904951	positive regulation of establishment of protein localization	81/3566	319/18723	0.00295992	0.0364765	0.0289386	3479/2696/23086/18/999/11156/27113/7042/2621/6659/5581/2752/3728/8398/65018/6844/54795/10307/55450/8660/55691/3717/22885/288/55929/2064/399687/22902/2737/51160/5208/57506/5213/10497/51768/9270/25874/29085/4628/10134/2182/6950/9141/3843/7203/5901/1956/27230/2822/9695/22948/94121/10575/9531/7043/10694/5580/10574/8754/3326/10576/6714/2181/8692/7545/5621/1736/2040/6934/27429/43/26229/163882/8851/1263…	81
SK-Mel-5	GO:0046040	IMP metabolic process	9/3566	18/18723	0.00298717	0.0366602	0.0290843	2618/5198/5471/10606/471/271/3251/353/4860	9
SK-Mel-5	GO:0097094	craniofacial suture morphogenesis	9/3566	18/18723	0.00298717	0.0366602	0.0290843	1112/1954/3638/4323/2737/4488/84314/7043/4325	9
SK-Mel-5	GO:0099172	presynapse organization	19/3566	53/18723	0.00299243	0.0366602	0.0290843	266727/10160/55737/57502/78999/1855/1981/4038/94030/8927/84189/27445/139065/7474/84631/10082/2239/5789/3556	19
SK-Mel-5	GO:0090092	regulation of transmembrane receptor protein serine/threonine kinase signaling pathway	67/3566	256/18723	0.00300831	0.0367173	0.0291296	23213/9315/79674/11167/659/4435/7042/4091/28996/2805/858/11030/9839/64081/3717/5465/25970/10140/7157/3175/9863/4926/2297/5170/3209/6868/656/57057/200734/657/81031/53918/7043/3675/2280/5654/3326/407975/5468/90/2200/7046/7049/161742/2201/4088/7474/6653/6422/23089/4092/80139/135228/51232/5046/55612/4036/753/655/1745/1028/375387/3280/9518/10252/10253/7057	67
SK-Mel-5	GO:0009612	response to mechanical stimulus	58/3566	216/18723	0.00300978	0.0367173	0.0291296	6387/168507/23349/3815/2113/9311/441027/1185/6662/3728/2805/79955/2021/6323/63895/5764/23621/4323/2185/6548/83862/5723/7048/5339/1756/841/1499/9780/440/2353/1956/1605/9531/3776/3746/6714/5727/3673/6513/6546/84189/4055/4214/5270/3725/63982/2354/5028/7132/1000/54532/6507/1634/5743/8061/2115/7057/3371	58
SK-Mel-5	GO:0010632	regulation of epithelial cell migration	75/3566	292/18723	0.00301472	0.0367173	0.0291296	5176/348/51466/659/3037/25960/7042/2113/2896/4233/4163/5581/6662/2752/3728/3373/4215/3315/10013/5764/5629/5797/2185/5607/7048/5547/5170/9270/5793/9647/6868/27086/51094/10000/493/116150/57381/2252/2822/5216/4780/3675/575/388/9353/8754/1839/6714/3673/80005/5468/4208/2247/6678/11221/153090/161742/7422/9734/7474/306/1950/9314/10371/5606/54566/1969/1634/5743/634/3791/301/3690/7057/6781	75
SK-Mel-5	GO:0008361	regulation of cell size	50/3566	181/18723	0.00302839	0.0368121	0.0292048	6387/57556/348/538/10512/4137/6696/659/23105/1185/65078/393/1954/6792/64798/80031/5802/8482/22902/10439/9990/65267/3897/128239/2258/114908/5916/10000/7410/6560/4869/2045/3326/9723/51393/10507/23108/10505/8851/343472/7422/9423/54910/7474/6405/223117/10371/10501/4133/4897	50
SK-Mel-5	GO:0097468	programmed cell death in response to reactive oxygen species	8/3566	15/18723	0.00306444	0.0371779	0.029495	4233/2021/65018/2309/10013/10494/10131/5074	8
SK-Mel-5	GO:0033674	positive regulation of kinase activity	113/3566	467/18723	0.00307411	0.0372229	0.0295308	3479/79092/3815/4137/6850/659/7042/2621/4233/4296/65018/22863/81617/2263/6385/80725/1856/3717/5629/1795/2064/2185/10961/5607/5608/10718/5208/3619/7048/55704/3667/1857/2044/808/5170/9270/90441/2258/904/6868/143384/3320/493/8322/56034/5062/7410/55011/23531/8312/4869/1956/896/657/7301/990/1027/1605/3480/4919/5580/2045/8754/1839/3570/9052/1164/3326/6714/5621/9770/1191/4254/7164/2247/219736/5770/4217/…	113
SK-Mel-5	GO:0021795	cerebral cortex cell migration	16/3566	42/18723	0.00309827	0.037306	0.0295966	266727/114327/2737/5455/2258/1499/200933/9353/57178/153090/8851/85458/7804/26468/9289/5454	16
SK-Mel-5	GO:1903432	regulation of TORC1 signaling	16/3566	42/18723	0.00309827	0.037306	0.0295966	143686/10325/58528/1497/55846/64121/64798/220441/84861/9681/23334/23274/140775/55011/81929/8444	16
SK-Mel-5	GO:0044409	entry into host	43/3566	151/18723	0.00310485	0.037306	0.0295966	2060/2621/10346/6609/6520/9830/3695/858/219931/1949/8764/3956/57617/8724/55128/7037/79581/3688/3921/2519/3678/3685/1956/7301/10581/1605/950/6714/3673/8692/5359/4061/286827/6575/55223/3693/6510/9076/5817/3383/1969/3690/3576	43
SK-Mel-5	GO:2001236	regulation of extrinsic apoptotic signaling pathway	43/3566	151/18723	0.00310485	0.037306	0.0295966	3479/8996/10116/6591/64798/5607/2537/5598/10197/1495/55179/4170/5062/5519/3685/2070/57630/596/2730/7128/6714/8692/6934/27429/2876/90/7857/7046/9181/467/4055/219699/5366/6422/2668/3655/85450/6376/3383/7015/51330/7078/7057	43
SK-Mel-5	GO:0033619	membrane protein proteolysis	20/3566	57/18723	0.00314327	0.0376951	0.0299054	348/7077/56928/23621/9860/51107/10939/25825/6868/5774/2822/29763/1605/8754/5045/7076/7133/51429/7078/8728	20
SK-Mel-5	GO:0009749	response to glucose	57/3566	212/18723	0.00315091	0.0377144	0.0299206	5176/2696/10891/2621/6659/26137/5581/2752/8398/111/5165/2021/6844/54795/57678/55450/2309/84327/8660/387597/2185/3956/9324/5208/1515/7048/2281/10497/2044/25874/29085/9024/8891/55011/5563/2822/133308/1027/3480/3939/2730/6546/6934/8892/23516/4830/415116/1958/1946/3795/8938/4041/4023/3383/130399/55107/7057	57
SK-Mel-5	GO:0009895	negative regulation of catabolic process	81/3566	320/18723	0.00323757	0.0386775	0.0306847	340371/10891/2272/84074/28996/4233/32/22933/9638/83547/65018/8925/23077/7077/5476/90427/302/5465/84861/64784/10140/80279/79048/210/9860/7157/23274/64802/8724/9641/706/80317/140775/2521/65992/81892/4085/5073/55353/8678/1981/6125/4170/57533/493/92345/54888/6201/51377/10492/5774/56893/1956/2822/596/1457/575/3326/1736/4130/8531/84879/5045/238/153090/7076/4983/10758/116986/5270/7538/4088/4248/56776/66…	81
SK-Mel-5	GO:1904356	regulation of telomere maintenance via telomere lengthening	21/3566	61/18723	0.00326189	0.0388937	0.0308563	8658/5570/79618/8550/3178/1499/5073/7013/6950/92345/7203/54552/3181/22948/10575/54984/10694/10574/10576/6714/1736	21
SK-Mel-5	GO:0051963	regulation of synapse assembly	31/3566	101/18723	0.00329262	0.0391108	0.0310285	6092/266727/5802/10160/80823/55737/78999/1981/94030/575/2045/23768/57463/4208/375790/84189/6495/10507/51804/347902/139065/57622/9423/7474/84631/10082/2239/5789/55607/3556/23266	31
SK-Mel-5	GO:1903509	liposaccharide metabolic process	31/3566	101/18723	0.00329262	0.0391108	0.0310285	8707/3815/80235/6609/6487/2760/3073/93183/9091/54344/93210/57704/10825/65258/54872/7357/8703/3074/8869/51097/5283/2822/27090/10402/5580/2581/79690/2583/6482/9331/6489	31
SK-Mel-5	GO:0032874	positive regulation of stress-activated MAPK cascade	37/3566	126/18723	0.00331326	0.0392813	0.0311637	222166/128853/7042/28996/4296/8324/4215/56940/2185/344558/10494/9867/90441/23236/8312/57630/9770/7187/3276/7164/4217/768211/4616/285613/153090/10125/4055/7422/8877/54910/7474/4317/2150/10371/23043/55504/9464	37
SK-Mel-5	GO:1901216	positive regulation of neuron death	30/3566	97/18723	0.00334861	0.0395072	0.031343	4137/7042/7020/2896/4296/2309/23621/7157/4835/6733/1522/1965/841/1499/4170/842/2353/2045/1728/5621/1191/4217/8851/1958/3725/7474/54434/3672/2904/54541	30
SK-Mel-5	GO:0048645	animal organ formation	22/3566	65/18723	0.00335129	0.0395072	0.031343	23213/6092/2263/2737/5292/7048/1499/3200/2627/657/2131/4208/2247/6495/7474/2668/4036/9464/655/7490/3280/10252	22
SK-Mel-5	GO:1905330	regulation of morphogenesis of an epithelium	22/3566	65/18723	0.00335129	0.0395072	0.031343	23213/2099/6662/1499/27086/2252/3239/2247/6495/219736/6909/85474/51804/3687/7422/7474/6422/2668/1950/655/30812/3976	22
SK-Mel-5	GO:0042398	cellular modified amino acid biosynthetic process	17/3566	46/18723	0.00338195	0.0397936	0.0315702	2678/34/3029/2686/55217/2593/9791/2618/2643/4780/2730/25902/5359/471/494143/79094/376497	17
SK-Mel-5	GO:0090398	cellular senescence	29/3566	93/18723	0.00339657	0.0398157	0.0315877	3398/4215/1017/5608/567/7157/6926/80317/8550/604/87178/26271/10000/657/1027/5074/5580/26156/3159/384/4217/6909/1026/1021/9521/9891/5606/7015/8091	29
SK-Mel-5	GO:0106027	neuron projection organization	29/3566	93/18723	0.00339657	0.0398157	0.0315877	547/1501/348/478/115703/26052/80725/10013/80823/65981/55737/23181/1855/85461/3480/3675/5621/23613/4130/26037/9456/26115/55619/22891/8851/7804/2904/5357/55607	29
SK-Mel-5	GO:0001654	eye development	92/3566	371/18723	0.00341374	0.0398429	0.0316093	5176/4094/340273/6096/3299/659/7042/7020/28996/3913/1410/25932/6662/7289/26160/1497/57728/8842/4286/23363/5764/5629/51057/5797/4867/56890/4211/388552/7111/2737/9742/22882/4669/7048/10319/5308/55000/79888/5916/1499/22926/2195/86/493/3615/8322/3066/6152/6297/200734/57381/7431/596/1027/1282/182/10848/2247/84189/4081/43/2200/84879/2823/6909/7046/285590/161742/7422/2201/4088/341640/7474/7068/55714/515…	92
SK-Mel-5	GO:0072329	monocarboxylic acid catabolic process	36/3566	122/18723	0.00341427	0.0398429	0.0316093	197257/112817/35/1666/32/414328/64900/56603/3032/283927/80724/2110/10994/23175/34/84129/8660/38/5465/39/6342/56898/5826/549/3667/10449/10005/30/51/26061/9942/27349/10478/2184/84879/1374	36
SK-Mel-5	GO:0048017	inositol lipid-mediated signaling	50/3566	182/18723	0.00341802	0.0398429	0.0316093	113791/3479/3815/7042/5334/4935/6662/22933/5364/25827/4150/3717/957/2064/56623/5863/5297/3667/375133/728233/5298/23236/677/2149/8678/56034/1956/7301/3480/4919/708/6714/222950/2247/10507/57605/153090/10125/219699/23413/5270/5156/51196/1950/2150/9314/1634/634/3791/22876	50
SK-Mel-5	GO:0031214	biomineral tissue development	47/3566	169/18723	0.00343451	0.0399605	0.0317026	3479/258/645811/6696/659/2621/729330/7020/6662/57560/10457/256764/54795/2263/5764/5465/22904/2185/7286/9270/1893/26271/2068/657/91461/7043/7071/6546/56172/55787/4208/90/5167/26504/2201/6574/4088/9562/166929/7480/1051/5743/655/23462/29887/3346/3347	47
SK-Mel-5	GO:0072088	nephron epithelium morphogenesis	24/3566	73/18723	0.00345445	0.0401179	0.0318275	4435/6662/26249/3911/2737/2297/1499/596/79191/5727/2247/6495/55083/51804/4609/7422/2668/6299/80000/7490/3280/30812/65266/3976	24
SK-Mel-5	GO:0010833	telomere maintenance via telomere lengthening	26/3566	81/18723	0.00347569	0.0402896	0.0319637	8658/5570/79618/8550/3178/1499/5073/7013/6950/85456/3320/92345/7203/54552/3181/22948/10575/54984/10694/10574/3326/10576/6714/1736/55651/7015	26
SK-Mel-5	GO:0030203	glycosaminoglycan metabolic process	35/3566	118/18723	0.00351401	0.0406584	0.0322563	3037/3425/6487/10090/3373/3073/6448/337876/960/5292/4669/2799/3074/79586/9435/10678/2131/10402/4166/92126/8692/2247/26035/8372/26229/22856/90161/92370/1950/1634/6482/55790/93010/80760/9957	35
SK-Mel-5	GO:0046661	male sex differentiation	46/3566	165/18723	0.00357935	0.0413378	0.0327953	3815/7042/2099/3157/6662/8031/192670/8648/4323/6926/1515/1718/3209/1499/1495/57647/10549/8894/2067/84159/2627/1299/4678/657/596/3239/10184/4254/8531/7046/51804/7022/7474/5156/6422/4257/6382/595/10371/80000/3383/4036/7490/9289/30812/54997	46
SK-Mel-5	GO:0021987	cerebral cortex development	34/3566	114/18723	0.00361173	0.041616	0.033016	266727/79633/6867/5802/114327/83696/8648/2737/583/5455/84687/2258/23236/1499/81853/2618/200933/22903/317762/10579/9353/597/471/6513/57178/153090/8851/85458/7804/1000/55970/26468/9289/5454	34
SK-Mel-5	GO:0030490	maturation of SSU-rRNA	18/3566	50/18723	0.00361676	0.041616	0.033016	2068/57647/83732/11157/4809/23212/6208/55127/55720/5822/9277/10171/25879/79954/28987/705/6217/10885	18
SK-Mel-5	GO:0051604	protein maturation	75/3566	294/18723	0.00363243	0.0417195	0.0330981	23555/1368/11093/6659/9528/2678/2619/26160/871/8996/6196/23621/9973/4323/2737/745/22900/11236/115209/51107/1718/2281/3633/840/55848/10939/1522/25825/5230/163859/6868/841/3329/10988/26999/2023/10549/1725/56265/831/80018/80155/3428/28972/2280/64065/8492/6714/1889/5727/143458/5621/30001/81619/9532/27429/83874/10539/5045/4311/9508/5270/79094/6653/2161/2152/5046/9718/5327/4325/8728/5122/54997/7057/1369	75
SK-Mel-5	GO:0035148	tube formation	42/3566	148/18723	0.00368583	0.0422552	0.0335231	7042/6659/144165/6662/7289/26160/2263/6385/1856/5629/79600/1857/9270/11146/5916/1855/1499/2648/7534/6201/5216/79191/3198/7408/5727/25902/115908/2247/6495/51804/153090/7422/54910/7474/6422/2668/1950/4036/7052/655/57619/30812	42
SK-Mel-5	GO:0090101	negative regulation of transmembrane receptor protein serine/threonine kinase signaling pathway	38/3566	131/18723	0.00370899	0.0423609	0.0336069	79674/4091/28996/858/64081/5465/10140/7157/3175/9863/5170/6868/57057/200734/81031/7043/2280/5654/407975/5468/90/2200/7049/161742/2201/7474/6653/6422/23089/4092/135228/51232/4036/753/1745/375387/10252/10253	38
SK-Mel-5	GO:0009147	pyrimidine nucleoside triphosphate metabolic process	11/3566	25/18723	0.00372763	0.0423609	0.0336069	54963/83549/8382/9519/4833/129607/1503/79077/4830/57089/7371	11
SK-Mel-5	GO:0062149	detection of stimulus involved in sensory perception of pain	11/3566	25/18723	0.00372763	0.0423609	0.0336069	6387/23349/9311/7442/6323/23621/83862/3673/409/56925/55107	11
SK-Mel-5	GO:0090382	phagosome maturation	11/3566	25/18723	0.00372763	0.0423609	0.0336069	84286/23682/10981/57192/338382/80208/7879/54734/55686/83871/11031	11
SK-Mel-5	GO:0003205	cardiac chamber development	45/3566	161/18723	0.00372895	0.0423609	0.0336069	6331/10512/6092/659/7042/4091/6659/2263/55742/5629/7157/6926/7048/3209/1832/57057/2627/657/3776/9353/2280/4061/182/407975/10848/4208/57211/90/6909/7046/7049/57493/9510/5318/7474/4092/6299/6586/80000/53834/4036/9464/655/23462/3280	45
SK-Mel-5	GO:0001706	endoderm formation	19/3566	54/18723	0.0038058	0.0431554	0.0342373	1294/1291/3909/8320/4323/1499/57057/3678/3685/2627/1284/1843/3693/1847/4317/4324/3676/8091/1846	19
SK-Mel-5	GO:2000377	regulation of reactive oxygen species metabolic process	44/3566	157/18723	0.00388329	0.0438781	0.0348106	4137/6850/5873/7020/1410/23530/22933/5165/65018/10901/23408/1497/2309/10013/6648/5465/2185/7157/4835/4358/7048/706/5547/3329/8678/2643/1956/10131/11334/596/4780/575/5580/2539/384/1026/4317/2150/10516/9263/655/948/3099/7057	44
SK-Mel-5	GO:0021799	cerebral cortex radially oriented cell migration	13/3566	32/18723	0.00388358	0.0438781	0.0348106	266727/2737/5455/1499/200933/57178/153090/8851/85458/7804/26468/9289/5454	13
SK-Mel-5	GO:0051052	regulation of DNA metabolic process	89/3566	359/18723	0.00396104	0.0446141	0.0353945	11105/158880/10891/659/8658/5570/2021/400410/27136/55063/10715/9400/10039/2185/83933/7157/4358/84309/64802/5893/79618/6778/2521/8550/604/3178/7037/1499/2956/54726/5073/151636/7013/6950/2068/8451/3320/5984/27000/5111/92345/7486/10189/126549/7203/54552/2067/4869/56893/1956/2070/3181/22948/10575/5983/54984/10694/5580/641/3776/10574/10419/2187/1843/3326/10576/6714/409/1736/2247/83666/79035/221656/219…	89
SK-Mel-5	GO:1902882	regulation of response to oxidative stress	30/3566	98/18723	0.003963	0.0446141	0.0353945	4233/143686/2021/65018/8996/3315/2309/10013/50640/6648/2686/135112/8382/5598/1499/5831/4170/8013/2643/10131/4780/5074/2861/27429/2876/219736/79772/10516/655/948	30
SK-Mel-5	GO:0048704	embryonic skeletal system morphogenesis	29/3566	94/18723	0.00403469	0.0453394	0.03597	7020/7289/3373/1954/3218/9775/57728/2263/3213/4323/2737/9742/7048/10265/1499/3200/29985/7043/3198/25902/6495/3219/7046/51804/4088/5156/655/4325/1746	29
SK-Mel-5	GO:0060443	mammary gland morphogenesis	16/3566	43/18723	0.004075	0.0456283	0.0361991	2099/2263/2737/10718/6926/7048/823/6778/6714/5727/6909/9423/7474/4041/1969/7421	16
SK-Mel-5	GO:1904591	positive regulation of protein import	16/3566	43/18723	0.004075	0.0456283	0.0361991	999/3728/3717/55929/2737/57506/9141/3843/5901/9531/5580/3326/8692/7545/4088/5743	16
SK-Mel-5	GO:0046849	bone remodeling	28/3566	90/18723	0.00409678	0.0457901	0.0363275	6850/6696/1200/4286/5764/537/2185/9545/7037/1499/1956/7043/2131/5166/7128/6714/115908/9770/10609/8792/133522/6422/4041/1969/3569/29887/84959/3690	28
SK-Mel-5	GO:0043624	cellular protein complex disassembly	39/3566	136/18723	0.00412051	0.0458626	0.036385	64780/344148/118/29767/11078/10013/10297/9645/8775/5756/89795/6711/7111/63908/6709/324/57701/84687/50861/2258/119/54516/58526/3312/6059/10300/327/55239/2107/1984/79929/4130/143244/9181/6840/23075/2150/822/10763	39
SK-Mel-5	GO:0048839	inner ear development	51/3566	188/18723	0.00413805	0.0458626	0.036385	54845/4094/7042/9935/729330/7020/5013/6662/9481/79955/3638/2263/6385/11078/11020/1856/5629/51057/525/2737/4358/4669/286262/3209/1855/2070/9497/1027/26018/7043/4919/3776/3198/1050/115908/7545/182/6678/84189/6495/219736/51804/5205/9423/341640/7474/140469/5357/2558/3280/10253	51
SK-Mel-5	GO:0014015	positive regulation of gliogenesis	22/3566	66/18723	0.00413846	0.0458626	0.036385	443/3398/5764/706/27339/3066/1956/1605/10419/4067/22891/5270/1959/7133/4036/3569/2119/5803/3280/30812/3976/10215	22
SK-Mel-5	GO:0030193	regulation of blood coagulation	22/3566	66/18723	0.00413846	0.0458626	0.036385	348/18/114897/5592/302/2149/7035/4780/5580/22875/10855/5270/5156/2161/2150/2152/948/10019/5327/634/84959/7057	22
SK-Mel-5	GO:0006493	protein O-linked glycosylation	27/3566	86/18723	0.00414731	0.0458626	0.036385	10610/2591/7423/6487/374378/66008/54790/22906/54344/55624/2589/79695/56983/285203/27090/10678/56913/23509/727936/51809/160335/6480/114805/2650/11226/6482/93010	27
SK-Mel-5	GO:1903510	mucopolysaccharide metabolic process	27/3566	86/18723	0.00414731	0.0458626	0.036385	3037/3425/6487/10090/3373/337876/960/5292/2799/79586/9435/10678/2131/10402/4166/92126/8692/2247/26035/8372/22856/1950/1634/6482/55790/93010/80760	27
SK-Mel-5	GO:0009746	response to hexose	58/3566	219/18723	0.00416781	0.0459694	0.0364698	5176/2696/10891/2621/6659/26137/5581/2752/8398/111/5165/2021/6844/54795/57678/55450/2309/84327/8660/387597/2185/3956/9324/5208/1515/7048/2281/10497/2044/25874/29085/9024/8891/55011/5563/2822/133308/1027/3480/3939/2730/6546/6934/8892/23516/4830/415116/1958/1946/3795/8938/4041/4023/3383/5743/130399/55107/7057	58
SK-Mel-5	GO:0010498	proteasomal protein catabolic process	117/3566	490/18723	0.00417168	0.0459694	0.0364698	114881/348/255488/2272/144165/9306/122773/79845/22933/90864/10444/92305/65018/130617/11337/25827/55139/10116/7328/23053/1017/55336/122416/5699/23321/23510/10612/387921/26232/11101/84861/4189/29978/23304/210/93611/10956/55070/51185/51136/79089/11236/55743/81858/84961/10513/9604/79654/146330/80344/6477/23588/285671/26234/2768/11146/65992/337867/9024/10197/89890/1855/10613/5708/90850/1499/10134/5706…	117
SK-Mel-5	GO:0048771	tissue remodeling	48/3566	175/18723	0.00420321	0.0462353	0.0366807	538/10512/6850/6696/2034/659/1200/10457/8996/4286/5764/4323/537/2185/7157/823/9545/7037/1499/2149/3200/1956/7043/2131/5166/7128/6714/115908/182/9770/4208/10609/8792/7076/133522/6422/4041/1464/1969/7052/9464/3569/29887/634/84959/7421/3976/3690	48
SK-Mel-5	GO:0010876	lipid localization	108/3566	448/18723	0.00422188	0.0462837	0.0367191	9227/10349/114881/348/6850/6696/729330/10347/114897/32/80765/10809/8398/1244/2760/114876/10577/57088/1119/219931/5360/8660/21/160518/1407/23461/302/50640/53349/5465/55102/5305/1408/51099/5608/6342/9600/57194/5826/2874/114883/26119/9641/706/29801/7357/10062/55852/9399/10257/10280/2182/29923/3074/23760/8322/116150/3685/347/27166/4833/10478/550/84649/5580/7274/114879/950/5727/2181/5359/123/5468/6513…	108
SK-Mel-5	GO:0002053	positive regulation of mesenchymal cell proliferation	10/3566	22/18723	0.00423724	0.0462837	0.0367191	6662/2263/8660/7048/1499/657/6495/4609/7474/4041	10
SK-Mel-5	GO:0009220	pyrimidine ribonucleotide biosynthetic process	10/3566	22/18723	0.00423724	0.0462837	0.0367191	54963/83549/8382/7378/4833/7372/1503/1723/4830/7371	10
SK-Mel-5	GO:0060343	trabecula formation	10/3566	22/18723	0.00423724	0.0462837	0.0367191	7059/2280/57211/7049/133522/2201/9510/6422/7480/23462	10
SK-Mel-5	GO:0035850	epithelial cell differentiation involved in kidney development	17/3566	47/18723	0.00437314	0.0475189	0.0376991	59/9788/4435/28999/3913/8842/4643/9863/1499/2131/182/4208/2668/6299/25937/7490/3976	17
SK-Mel-5	GO:0043618	regulation of transcription from RNA polymerase II promoter in response to stress	17/3566	47/18723	0.00437314	0.0475189	0.0376991	2034/22933/84181/7157/1388/5598/22926/4780/9531/3337/219736/1958/467/7422/3725/10365/1051	17
SK-Mel-5	GO:0046677	response to antibiotic	17/3566	47/18723	0.00437314	0.0475189	0.0376991	538/3373/2021/3717/6548/7157/23135/841/3320/842/1027/8692/4208/8372/1374/6507/1543	17
SK-Mel-5	GO:0048469	cell maturation	47/3566	171/18723	0.00439026	0.0475396	0.0377155	64100/695/30819/2034/117155/22933/137964/1910/152015/54763/10116/53335/2309/6196/2185/10481/1738/9319/1499/26271/2068/865/201164/11334/23294/596/5991/4882/2539/5047/1050/84456/5468/375790/26256/29842/1026/7422/10365/631/4929/6376/9331/26468/3280/30812/4897	47
SK-Mel-5	GO:0110148	biomineralization	47/3566	171/18723	0.00439026	0.0475396	0.0377155	3479/258/645811/6696/659/2621/729330/7020/6662/57560/10457/256764/54795/2263/5764/5465/22904/2185/7286/9270/1893/26271/2068/657/91461/7043/7071/6546/56172/55787/4208/90/5167/26504/2201/6574/4088/9562/166929/7480/1051/5743/655/23462/29887/3346/3347	47
SK-Mel-5	GO:0070306	lens fiber cell differentiation	14/3566	36/18723	0.00444186	0.0480151	0.0380927	4094/3299/5629/7111/200734/7431/1027/2247/161742/4088/631/1969/10252/10253	14
SK-Mel-5	GO:0043409	negative regulation of MAPK cascade	49/3566	180/18723	0.00452646	0.0488452	0.0387512	57556/348/6609/57447/10347/5037/65018/55450/1845/80279/140885/2874/1850/5187/9270/51231/200734/10251/1605/3480/2633/5580/51339/1843/8692/5468/54206/11221/5770/4067/338761/153090/161742/467/4609/6653/6422/1847/2150/9314/655/10019/7078/1848/3976/10252/10253/1846/81848	49
SK-Mel-5	GO:0008360	regulation of cell shape	43/3566	154/18723	0.0045954	0.0494184	0.039206	3815/9886/23580/10154/5364/55785/5361/5764/55742/51057/23433/2185/5365/5064/57194/114793/116985/4628/91010/3074/30011/5362/57381/1605/51177/23136/388/221061/9723/10507/10435/7422/11135/5028/6285/54509/10602/3383/1902/3791/57619/301/390	43
SK-Mel-5	GO:0030856	regulation of epithelial cell differentiation	43/3566	154/18723	0.0045954	0.0494184	0.039206	54845/4435/6662/118/84162/8842/6926/4926/23236/1499/677/200734/5991/1027/29841/5727/182/1903/2247/54206/9294/161742/7422/7538/7132/2668/6935/135228/595/7480/3397/55273/25937/1051/634/3280/7421/3976/2118/23764/10252/10253/81575	43
SK-Mel-5	GO:0046578	regulation of Ras protein signal transduction	51/3566	189/18723	0.00463963	0.0498082	0.0395153	3479/64787/348/7042/26053/4233/57221/65078/25959/83478/7077/9649/11337/27352/55114/5863/10564/26269/8216/50861/604/89890/2149/3688/253980/117178/199731/10276/9267/10251/10161/3675/55379/10603/4254/9181/153090/57493/10125/4983/54869/19/202243/51196/8437/2150/1902/9289/10252/10253/81848	51
SK-Mel-5	GO:0010717	regulation of epithelial to mesenchymal transition	30/3566	99/18723	0.00466994	0.0499224	0.0396058	7042/147906/10439/7048/1499/51094/3066/57057/200734/1605/7043/182/6934/90/55223/7046/153090/161742/4088/6422/4092/80139/25937/753/655/3569/6615/51176/10252/10253	30
SK-Mel-5	GO:0150063	visual system development	92/3566	375/18723	0.00470654	0.0499224	0.0396058	5176/4094/340273/6096/3299/659/7042/7020/28996/3913/1410/25932/6662/7289/26160/1497/57728/8842/4286/23363/5764/5629/51057/5797/4867/56890/4211/388552/7111/2737/9742/22882/4669/7048/10319/5308/55000/79888/5916/1499/22926/2195/86/493/3615/8322/3066/6152/6297/200734/57381/7431/596/1027/1282/182/10848/2247/84189/4081/43/2200/84879/2823/6909/7046/285590/161742/7422/2201/4088/341640/7474/7068/55714/515…	92
SK-Mel-5	GO:0006986	response to unfolded protein	39/3566	137/18723	0.00472277	0.0499224	0.0396058	10133/25822/10347/92305/871/3315/11080/3338/153222/4189/80279/10956/1388/51768/65992/89890/1965/3329/3312/22926/3320/10808/27230/26608/55432/9695/4780/9531/3337/3326/30001/3311/5770/23645/153090/467/79094/595/7057	39
SK-Mel-5	GO:0002902	regulation of B cell apoptotic process	9/3566	19/18723	0.00472489	0.0499224	0.0396058	695/8660/604/27086/26155/57181/407975/4067/100	9
SK-Mel-5	GO:0006144	purine nucleobase metabolic process	9/3566	19/18723	0.00472489	0.0499224	0.0396058	2766/2618/5471/10606/8833/3251/353/5631/100	9
SK-Mel-5	GO:0009148	pyrimidine nucleoside triphosphate biosynthetic process	9/3566	19/18723	0.00472489	0.0499224	0.0396058	54963/83549/8382/9519/4833/129607/1503/4830/7371	9
SK-Mel-5	GO:0035461	vitamin transmembrane transport	9/3566	19/18723	0.00472489	0.0499224	0.0396058	10560/81034/113235/6573/8884/80704/9962/376497/4036	9
SK-Mel-5	GO:0061323	cell proliferation involved in heart morphogenesis	9/3566	19/18723	0.00472489	0.0499224	0.0396058	659/6662/5292/6926/5308/1499/6495/9464/3280	9
SK-Mel-5	GO:0098780	response to mitochondrial depolarisation	9/3566	19/18723	0.00472489	0.0499224	0.0396058	10133/65018/54832/22863/10013/2874/8678/27429/3099	9
SK-Mel-5	GO:0071774	response to fibroblast growth factor	35/3566	120/18723	0.00473016	0.0499224	0.0396058	23213/55959/2591/3373/2263/960/91612/9270/1499/677/2252/10251/2131/1960/3746/2730/23768/2257/143282/8692/2247/7538/9592/7474/6422/3164/53834/2264/10252/10253/7057/3576/81848/3371/387914	35
501Mel	GO:0006260	DNA replication	136/4741	260/18723	7.00552e-21	4.38826e-17	3.67384e-17	23175/56953/57804/27154/7157/7126/55218/5518/4784/10533/5001/29803/51550/84897/5423/9400/54465/1877/9188/92667/57418/4999/6117/6240/11232/80010/57695/1660/23594/7013/5980/9984/6418/23560/345643/84083/8412/5982/11169/2237/10293/983/6742/80169/144455/7270/5558/7486/6282/675/7150/116447/25942/8317/5985/6241/11073/157570/54107/64785/5981/23649/890/84296/10535/898/4173/5424/254394/64061/80174/253714/6…	136
501Mel	GO:0042254	ribosome biogenesis	146/4741	299/18723	1.05811e-18	3.31402e-15	2.77449e-15	6041/2752/5728/8780/63899/387338/131870/54853/84769/8450/51018/29102/4809/25879/51013/64979/51121/55505/4839/83939/9188/6128/9136/10200/6194/10607/54433/84549/79954/26574/57418/153443/6059/8568/51367/64745/9816/10557/64794/4931/9326/6209/6838/80135/5901/6130/27292/28987/55720/51106/23560/6155/64434/6227/4736/6169/84365/23195/83732/6165/27340/51575/92345/260294/79050/92342/79707/6839/50628/51504/1…	146
501Mel	GO:0007059	chromosome segregation	160/4741	346/18723	1.67566e-17	3.49878e-14	2.92917e-14	22933/200942/8658/10096/127829/324/8780/8678/64940/51112/2072/292/51115/55743/129563/5518/9525/10540/83852/7917/2908/9391/192670/8766/1778/283489/79903/27243/150465/9400/55143/25906/29127/49856/56984/5889/10403/23137/6188/10726/29781/55920/80010/9918/64210/23353/10735/80152/672/7013/25936/332/5901/9874/3192/90417/148479/10592/9055/23047/79023/2237/1894/8243/64682/57405/54069/10783/29893/55795/106…	160
501Mel	GO:0006261	DNA-dependent DNA replication	87/4741	151/18723	2.97019e-17	4.65132e-14	3.89408e-14	57804/55218/10533/5001/5423/9400/54465/9188/92667/57418/4999/6117/11232/23594/7013/5980/9984/84083/5982/11169/2237/10293/6742/144455/5558/7486/675/8317/5985/11073/54107/64785/5981/23649/84296/898/4173/5424/254394/80174/253714/10721/79075/51053/8914/9837/92797/5425/4172/5422/4174/79892/4175/1763/10189/5983/81620/4171/990/55159/26271/10926/11177/4998/5111/10714/3978/55345/54962/79733/5984/4796/4176…	87
501Mel	GO:0006364	rRNA processing	115/4741	225/18723	6.99174e-17	8.75926e-14	7.33324e-14	6041/8780/63899/387338/131870/54853/51018/4809/25879/51013/55505/4839/9188/9136/10200/6194/10607/54433/84549/79954/57418/153443/8568/51367/10557/4931/9326/6209/80135/6130/27292/28987/55720/51106/23560/6155/6227/4736/84365/23195/83732/6165/27340/51575/92345/260294/79050/92342/79707/6839/50628/51504/11103/26156/8886/10436/5394/2483/6135/55035/6201/10199/84128/134430/11224/79039/29081/23016/1662/105…	115
501Mel	GO:0016072	rRNA metabolic process	118/4741	236/18723	2.36159e-16	2.4655e-13	2.06411e-13	6041/4137/65080/8780/63899/387338/131870/54853/51018/29102/4809/25879/51013/55505/4839/9188/9136/10200/6194/10607/54433/84549/79954/57418/153443/8568/51367/10557/4931/9326/6209/80135/6130/27292/28987/55720/51106/23560/6155/6227/4736/84365/23195/83732/6165/27340/51575/92345/260294/79050/92342/79707/6839/50628/51504/11103/26156/8886/10436/5394/2483/6135/55035/6201/10199/84128/134430/11224/79039/290…	118
501Mel	GO:0022613	ribonucleoprotein complex biogenesis	194/4741	463/18723	2.33139e-15	2.08626e-12	1.74661e-12	6041/2752/60677/5728/8780/27335/63899/7375/387338/131870/54853/10659/192670/23020/84769/103/25980/8450/51018/8487/29102/4809/25879/51013/64979/51121/55505/4839/23521/83939/10946/9188/6128/9136/25929/10200/6194/10607/9129/54433/84549/79954/26574/57418/8161/55692/153443/6059/8568/51367/64745/9816/1660/10557/64794/4931/1207/8175/5433/9326/6209/6838/80135/5901/6130/6426/27292/28987/55720/51106/27339/…	194
501Mel	GO:0000819	sister chromatid segregation	102/4741	202/18723	1.0964e-14	8.58479e-12	7.18717e-12	8658/324/8678/64940/51115/55743/129563/9525/10540/8766/283489/27243/55143/25906/29127/49856/56984/5889/10403/23137/10726/29781/9918/10735/25936/5901/3192/90417/148479/10592/9055/23047/2237/8243/64682/10783/55795/1060/3833/991/55294/84250/55055/9700/23397/27436/10300/113130/699/157570/10615/472/11065/10460/54892/6421/11130/10464/54908/9787/81929/5347/23310/9126/79075/64151/4751/7175/10051/7153/149…	102
501Mel	GO:0000070	mitotic sister chromatid segregation	88/4741	168/18723	4.69042e-14	3.26453e-11	2.73306e-11	8658/324/8678/51115/129563/9525/10540/8766/283489/27243/55143/25906/29127/49856/56984/10403/23137/10726/29781/9918/25936/5901/3192/90417/148479/10592/9055/23047/8243/64682/10783/55795/1060/3833/991/84250/55055/9700/23397/27436/10300/113130/699/10615/472/11065/10460/54892/11130/10464/54908/9787/81929/5347/23310/9126/79075/64151/4751/7175/10051/3835/11004/83540/9319/1063/7272/55755/64105/81930/9928…	88
501Mel	GO:0045333	cellular respiration	110/4741	230/18723	1.15058e-13	6.88403e-11	5.7633e-11	4967/23530/50/55753/3419/2110/65018/10891/56181/5160/4702/8604/1329/4190/4719/27069/1431/4700/1337/1738/4711/57017/79085/374291/7385/7381/3588/6392/1537/1351/7384/4697/7386/4723/8802/9377/80219/1327/6389/48/1737/92014/4720/215/4191/29796/6390/10105/27089/4698/1340/8803/4713/6391/4722/4715/90624/4728/4695/55847/1743/54205/400916/4704/4708/3421/847/84277/84883/1352/4696/10975/93058/1345/9167/5162/9…	110
501Mel	GO:0140014	mitotic nuclear division	130/4741	287/18723	1.20888e-13	6.88403e-11	5.7633e-11	3479/146691/22933/200942/858/23363/9820/8658/324/8678/9371/23113/10201/2801/51115/129563/9525/26073/10540/8766/283489/1027/2059/27243/55143/25906/29127/49856/56984/10403/23137/10726/29781/9918/90990/10735/3796/9088/25936/5901/3192/90417/148479/10592/9055/10419/23047/8243/64682/10783/55795/1060/126731/3833/991/56647/84250/55055/729440/9700/23397/27436/152185/440145/10300/113130/699/157313/6152/798…	130
501Mel	GO:0015980	energy derivation by oxidation of organic compounds	140/4741	318/18723	2.13261e-13	1.11322e-10	9.31989e-11	2548/3479/4967/23530/50/9945/55753/3419/2110/65018/10891/178/2997/56181/5160/5213/4702/8604/89801/1329/2632/4190/5836/4719/27069/1431/4700/1337/5834/1738/34/4711/57017/5509/79085/374291/79660/7385/7381/3588/6392/1537/1351/7384/4697/7386/4723/8802/9377/80219/1327/6389/48/1737/92014/4720/215/4191/29796/6390/10105/27089/4698/1340/8803/2932/4713/6391/4722/4715/90624/7157/4728/7360/4695/55847/1743/542…	140
501Mel	GO:0098813	nuclear chromosome segregation	127/4741	281/18723	2.822e-13	1.35977e-10	1.1384e-10	22933/200942/8658/10096/324/8678/64940/51112/2072/51115/55743/129563/9525/10540/7917/192670/8766/1778/283489/27243/150465/55143/25906/29127/49856/56984/5889/10403/23137/10726/29781/55920/80010/9918/23353/10735/7013/25936/5901/3192/90417/148479/10592/9055/23047/2237/1894/8243/64682/10783/29893/55795/1060/3833/991/55294/83990/84250/55055/9700/23397/27436/152185/10300/113130/699/157570/898/10615/472…	127
501Mel	GO:0006091	generation of precursor metabolites and energy	196/4741	490/18723	3.66363e-13	1.63921e-10	1.37235e-10	1588/80201/2548/3479/4967/23530/50/9945/2696/55753/3419/2110/55902/217/4835/7306/65018/221264/10891/5313/178/2997/56181/957/5160/5213/291/4702/8604/9563/89801/1329/2632/4190/5236/5836/4719/27069/1431/4700/1337/3098/5834/1738/34/4711/57017/5509/79085/314/374291/79660/2821/7385/7381/3588/6392/1537/8659/1351/7384/4697/7386/4723/5465/2235/8802/3155/9377/80219/1327/6389/5208/38/48/1737/92014/4720/215/…	196
501Mel	GO:0022904	respiratory electron transport chain	65/4741	114/18723	5.79699e-13	2.42082e-10	2.02671e-10	2110/65018/10891/4702/8604/1329/4719/27069/4700/1337/1738/4711/57017/374291/7381/6392/1537/1351/7384/4697/7386/4723/9377/1327/6389/92014/4720/29796/6390/27089/4698/4713/6391/4722/4715/4728/4695/54205/4704/4708/84883/4696/10975/1345/9167/9997/4731/4707/4694/1347/4705/5339/4706/54949/1350/55967/1355/1716/11232/79751/983/637/10514/4729/891	65
501Mel	GO:0009060	aerobic respiration	92/4741	189/18723	3.28962e-12	1.28789e-09	1.07822e-09	4967/23530/50/55753/3419/65018/56181/5160/4702/1329/4190/4719/27069/1431/4700/1337/1738/4711/57017/79085/374291/7385/7381/6392/1537/1351/7384/4697/4723/8802/9377/1327/6389/48/1737/92014/4720/215/4191/29796/6390/10105/27089/4698/1340/8803/4713/6391/4722/4715/4728/4695/1743/54205/400916/4704/4708/3421/847/84277/1352/4696/10975/1345/9167/5162/4731/4707/4694/1347/4705/2271/4706/402/54949/1350/55967/3…	92
501Mel	GO:0048285	organelle fission	192/4741	488/18723	3.75211e-12	1.38254e-09	1.15746e-09	3479/11105/146691/65018/10891/56181/22933/29988/4137/200942/79594/858/23363/9820/8799/8658/10005/10096/125170/6773/23304/120892/324/8678/5898/51537/1352/9371/54471/23113/10201/2801/2072/51115/55743/129563/9525/23023/26073/10540/4976/4437/7917/65084/192670/8766/283489/55737/1027/2059/91137/27243/55143/25906/29127/3622/49856/56984/994/5889/10403/23137/10726/29781/80010/9918/192111/23353/90990/10735…	192
501Mel	GO:0007051	spindle organization	90/4741	184/18723	4.00671e-12	1.39433e-09	1.16733e-09	10579/10039/8658/6867/6047/9371/22924/1213/2801/1453/51115/9525/26073/3985/10540/8766/1778/27243/29127/49856/10403/6188/5116/153241/10726/3925/284403/90990/10735/3796/10426/5901/3192/55521/54930/90417/10982/9055/6491/57519/8243/57405/10783/5310/126731/259266/203068/3833/991/56647/11076/729440/9700/152185/440145/79866/22974/10615/10460/10464/9787/3832/5347/9126/9133/4751/7175/1104/56992/83540/1151…	90
501Mel	GO:0140694	non-membrane-bounded organelle assembly	152/4741	367/18723	7.40597e-12	2.44163e-09	2.04413e-09	10324/80206/128486/4137/9172/53349/8837/8994/23363/29767/8658/253943/4892/6047/9371/22924/4703/2801/51112/1453/8760/5601/9525/26073/5339/636/825/8766/1778/84769/27243/29127/49856/4839/83939/6128/124093/9738/6188/88/153241/284403/90990/10735/80152/672/3796/10426/7840/6209/3192/54930/10982/345643/255967/6169/23195/9055/9851/6491/22995/57519/79959/8243/282809/6175/10783/284001/1060/126731/259266/203…	152
501Mel	GO:0045786	negative regulation of cell cycle	156/4741	385/18723	2.96875e-11	9.29812e-09	7.78437e-09	5526/146691/3248/23026/26524/22809/8658/7077/26270/10457/324/1112/5728/2619/23368/7157/6494/57099/10263/5567/25/323/10201/10116/3275/64848/26001/90313/55743/2296/64859/2074/84936/1020/7026/596/6659/9344/1027/79027/1031/5371/65123/5514/27243/25906/4193/54465/56984/23513/10403/9738/29117/79035/10527/388/58190/672/54888/7013/9984/1021/51696/27339/83695/345643/80279/7040/91147/983/51720/144455/55795/…	156
501Mel	GO:0044772	mitotic cell cycle phase transition	168/4741	424/18723	4.36767e-11	1.30281e-08	1.09071e-08	65061/22933/23026/26524/11178/3373/3398/6604/10457/324/1112/5728/64839/7157/57099/23276/10263/808/5127/3275/55743/64859/5569/84936/10983/9525/1020/596/54850/8766/6659/9344/1027/2059/79027/79616/1031/5371/65123/27243/8450/25906/4193/7027/1871/56984/994/5889/10403/81853/23137/29117/6194/54619/79035/6502/58190/55920/2935/57695/9024/672/9088/128239/1021/80279/5129/5218/84930/5530/983/51720/64682/1078…	168
501Mel	GO:1902850	microtubule cytoskeleton organization involved in mitosis	74/4741	147/18723	5.72013e-11	1.62868e-08	1.36352e-08	10579/10039/8658/6867/9371/3064/1213/2801/51115/9525/26073/10540/5048/8766/1778/27243/29127/49856/10403/5116/10726/3925/284403/90990/10735/3796/5901/3192/9055/6491/8243/57405/10783/5310/126731/3833/3688/991/56647/729440/9700/152185/440145/79866/22974/10460/10464/54908/9787/3832/5347/9126/4751/7175/1104/56992/83540/7272/55755/891/51203/1058/4605/4085/9212/84722/11200/64946/9493/89958/1062/79187/10…	74
501Mel	GO:0007346	regulation of mitotic cell cycle	177/4741	457/18723	1.17545e-10	3.20131e-08	2.68013e-08	3479/150094/146691/1845/22933/23026/858/3373/3398/23363/9820/6604/7077/10457/324/1112/5728/2619/7157/57099/5578/23276/10263/25/8729/23326/23113/10201/3275/64848/55743/2296/64859/5569/84936/23331/9525/26073/5048/596/8766/6659/1540/9344/1027/79027/5371/65123/5514/150465/25906/4193/7027/56984/994/5889/23513/1877/10403/81853/29117/79035/26574/58190/55920/984/672/9088/3192/51696/345643/80279/7040/1041…	177
501Mel	GO:0051656	establishment of organelle localization	155/4741	390/18723	1.89143e-10	4.93664e-08	4.13295e-08	5730/547/129880/4747/5864/65018/537/6812/23233/4131/51566/4137/5873/4644/84327/695/79083/2241/79443/22820/80208/10096/5170/55860/4646/23299/10013/1780/22871/1001/120892/1759/11261/8678/66008/6845/22920/9371/3064/8729/60412/55717/9230/4935/553115/51112/9342/1453/4641/51115/5861/23208/3800/3162/5663/5870/9527/9525/3985/10540/5048/4976/1020/64149/636/7016/55062/9638/8195/8766/1778/283489/85440/56848…	155
501Mel	GO:0042773	ATP synthesis coupled electron transport	53/4741	95/18723	2.36939e-10	5.7084e-08	4.77906e-08	65018/4702/1329/4719/27069/4700/1337/1738/4711/57017/374291/7381/6392/1537/1351/7384/4697/4723/9377/1327/6389/4720/29796/27089/4698/4713/6391/4722/4715/4728/4695/54205/4704/4708/4696/10975/1345/9167/4731/4707/4694/1347/4705/4706/54949/1350/55967/1355/1716/983/637/4729/891	53
501Mel	GO:0042775	mitochondrial ATP synthesis coupled electron transport	53/4741	95/18723	2.36939e-10	5.7084e-08	4.77906e-08	65018/4702/1329/4719/27069/4700/1337/1738/4711/57017/374291/7381/6392/1537/1351/7384/4697/4723/9377/1327/6389/4720/29796/27089/4698/4713/6391/4722/4715/4728/4695/54205/4704/4708/4696/10975/1345/9167/4731/4707/4694/1347/4705/4706/54949/1350/55967/1355/1716/983/637/4729/891	53
501Mel	GO:0007052	mitotic spindle organization	62/4741	120/18723	5.21002e-10	1.13532e-07	9.50487e-08	10579/10039/8658/6867/9371/1213/2801/51115/9525/26073/10540/8766/1778/27243/29127/49856/10403/5116/10726/3925/284403/90990/10735/3796/5901/3192/9055/6491/8243/57405/10783/5310/126731/3833/991/56647/729440/152185/440145/79866/22974/10460/10464/9787/3832/5347/9126/4751/7175/1104/56992/83540/7272/891/4605/9212/84722/11200/64946/9493/1062/79187	62
501Mel	GO:0006099	tricarboxylic acid cycle	24/4741	30/18723	5.21192e-10	1.13532e-07	9.50487e-08	4967/23530/50/55753/3419/5160/4190/1431/6392/8802/6389/48/1737/4191/6390/8803/6391/1743/3421/5162/2271/54949/3420/3658	24
501Mel	GO:0022900	electron transport chain	82/4741	175/18723	5.2561e-10	1.13532e-07	9.50487e-08	1588/2110/217/4835/65018/10891/4702/8604/1329/4719/27069/4700/1337/1738/4711/57017/314/374291/7381/6392/1537/8659/1351/7384/4697/7386/4723/9377/1327/6389/92014/4720/29796/6390/2108/27089/4698/1340/5447/4713/6391/4722/4715/4728/4695/57019/54205/4704/4708/84883/4696/10975/1345/9167/9997/4731/4707/4694/1347/4705/5339/4706/54949/1350/55967/3420/51079/1349/2230/1355/1716/231/11232/79751/10954/983/1032…	82
501Mel	GO:0034470	ncRNA processing	155/4741	395/18723	5.6225e-10	1.17398e-07	9.82852e-08	6041/285381/8780/285605/8270/83707/63899/138716/79650/55152/387338/11102/131870/54853/192670/81605/112858/79979/65123/103/51018/29102/4809/25879/51013/127253/55505/4839/9188/9136/10200/6194/10607/54433/84549/79954/57418/153443/8568/91801/51367/55656/51574/348180/10557/4931/54888/9326/6209/80135/6130/27292/28987/55596/55720/51106/23560/6155/6227/4736/84365/23195/83732/6165/27340/51575/92345/260294…	155
501Mel	GO:0000280	nuclear division	168/4741	439/18723	1.00271e-09	2.02613e-07	1.69627e-07	3479/11105/146691/22933/29988/200942/858/23363/9820/8658/10096/23304/324/8678/9371/23113/10201/2801/2072/51115/55743/129563/9525/26073/10540/4437/7917/192670/8766/283489/1027/2059/27243/55143/25906/29127/3622/49856/56984/994/5889/10403/23137/10726/29781/80010/9918/23353/90990/10735/3796/9088/7013/25936/5901/3192/90417/148479/10592/9055/10419/23047/8243/64682/10783/29893/55795/1060/126731/259266/6…	168
501Mel	GO:1903320	regulation of protein modification by small protein conjugation or removal	104/4741	242/18723	1.33298e-09	2.60931e-07	2.18451e-07	144165/23551/2034/65018/26232/23077/79594/54472/11337/23376/7189/754/3300/5581/10273/120892/5728/11261/3984/25/8915/78990/553115/7466/55743/2475/5970/7375/5663/339745/5601/7965/23328/1020/51160/8945/825/10075/6659/165324/56254/2729/2874/54726/2295/10054/6188/6502/57561/1616/672/3091/6209/9112/23560/80279/11146/84259/6224/151636/2534/10362/139285/868/991/55294/6135/10196/6201/3320/8312/11065/6125/…	104
501Mel	GO:0000723	telomere maintenance	65/4741	131/18723	1.77094e-09	3.36158e-07	2.81431e-07	10039/79618/8658/7011/2072/26277/23293/5609/54386/5371/5514/10576/55505/5889/23137/54433/79035/6117/2547/64858/8550/7013/65057/3192/7515/55183/92345/2237/10728/80169/3183/7486/675/9937/5394/167227/3320/10694/5981/9894/898/472/3184/4751/3181/1499/55651/1763/6119/51002/3178/140609/1736/5111/9156/9212/26354/7517/5888/9401/54984/641/80119/7015/4609	65
501Mel	GO:0070507	regulation of microtubule cytoskeleton organization	71/4741	148/18723	2.10399e-09	3.8763e-07	3.24523e-07	10634/122060/57704/4131/4137/89795/10039/10382/2042/8874/23299/10013/2932/324/5058/6047/10263/25/22924/4233/1213/8777/6249/23271/9525/146057/5048/636/24139/402/1540/1778/1027/57606/27243/2288/6188/3925/51199/90102/79929/3192/55521/10982/85458/5310/126731/11076/9181/10300/4130/403/79866/22974/10615/10460/10142/5347/1946/7175/56992/55755/81930/221150/348235/8851/84722/50861/79187/2258/4133	71
501Mel	GO:0019646	aerobic electron transport chain	48/4741	87/18723	2.72737e-09	4.88121e-07	4.08654e-07	65018/4702/1329/4719/4700/1337/1738/4711/57017/374291/7381/6392/1537/1351/7384/4697/4723/9377/1327/6389/92014/4720/29796/27089/4698/4713/6391/4722/4715/4728/4695/54205/4704/4708/4696/10975/1345/9167/4731/4707/4694/1347/4705/4706/54949/1350/1355/4729	48
501Mel	GO:0033044	regulation of chromosome organization	84/4741	187/18723	4.12435e-09	7.17637e-07	6.00805e-07	4137/79618/8658/324/8678/6047/51112/2072/26277/23293/55743/83852/5609/54386/5371/5514/25906/10576/56984/10403/23137/79035/8550/7013/65057/3192/7515/92345/2237/64682/6742/10783/80169/55795/3183/5394/84250/167227/55055/9700/113130/10694/699/472/11065/10460/6421/11130/3184/54908/9787/5347/4751/7175/3181/7153/1499/9319/1063/7272/55755/81620/891/4171/990/3178/26271/140609/1736/116028/701/1786/1843/408…	84
501Mel	GO:0010639	negative regulation of organelle organization	137/4741	348/18723	4.36639e-09	7.39219e-07	6.18873e-07	51332/119/3479/115704/146691/2039/80206/65018/10891/10493/4000/4131/4137/118/10391/79594/89795/27069/10382/6712/29767/8658/11344/10449/8874/91663/10013/10105/120892/324/4534/8678/7157/11078/57175/4233/10565/10201/2072/26277/23293/292/6709/23271/3985/146057/598/4976/8500/57143/24139/7016/5217/10075/9638/8195/2729/54386/2059/7879/10413/25906/56984/2288/55254/10403/9738/54434/3925/672/7013/90102/650…	137
501Mel	GO:0044839	cell cycle G2/M phase transition	70/4741	148/18723	5.78668e-09	9.53889e-07	7.98594e-07	22809/6604/1112/64839/57099/808/55743/64859/5569/84936/9525/54850/8766/9344/65123/994/5889/79035/6502/55920/9024/672/9088/80279/5218/84930/983/51720/80169/284001/8883/25942/8317/79621/11073/5243/890/472/80174/1030/63967/9833/5347/8444/4869/1111/9133/51514/22976/1063/9928/891/990/26271/995/4998/993/9212/90381/11200/79915/7465/2273/54984/641/7480/1263/595/10763/8091	70
501Mel	GO:0010948	negative regulation of cell cycle process	119/4741	294/18723	6.90284e-09	1.09798e-06	9.19223e-07	5526/146691/23026/22809/8658/26270/10457/324/1112/5728/7157/57099/10263/323/10201/10116/3275/55743/64859/2074/84936/596/6659/9344/1027/79027/5371/65123/5514/27243/25906/4193/54465/56984/10403/9738/29117/79035/58190/672/54888/7013/9984/27339/83695/80279/91147/983/51720/144455/55795/84444/8883/83990/5933/55055/9700/79621/11073/699/153090/51065/472/11130/5573/79968/1030/54908/63967/5347/4869/1111/89…	119
501Mel	GO:0071897	DNA biosynthetic process	81/4741	180/18723	7.01134e-09	1.09798e-06	9.19223e-07	9104/2185/57804/10039/7084/79618/8658/7011/7157/26277/659/23293/26073/5609/54386/5423/10576/7027/9100/55505/54433/6117/11232/8550/4931/7013/5980/65057/3192/5982/7298/92345/10728/80169/3183/7486/5394/167227/5985/3320/10694/286826/54107/5981/9894/5424/472/7083/3184/10721/79075/4751/3181/1499/55651/5425/51514/5422/1063/3776/5983/3178/140609/1736/5111/10714/3978/1843/5984/9212/27000/409/9314/63922/54…	81
501Mel	GO:0009062	fatty acid catabolic process	52/4741	100/18723	9.49047e-09	1.44996e-06	1.2139e-06	1384/35/1666/2110/80724/23175/3032/1962/30/56898/254552/283927/5264/34/23417/32/10005/5465/10449/38/10994/215/64900/2108/1376/8310/6342/1892/54677/1374/549/3030/5095/1891/23659/51/10999/219743/83752/2475/3295/1632/5828/3033/8660/390916/3712/5096/171586/10478/26061/84879	52
501Mel	GO:0046148	pigment biosynthetic process	37/4741	62/18723	1.01809e-08	1.51841e-06	1.27121e-06	1638/4948/7306/7390/7220/6490/1497/23657/211/2235/1652/9839/1001/51151/200205/1352/4435/4935/51629/10755/210/7299/3658/1355/283652/10857/6470/8833/353/5471/100/23596/10606/5631/4157/1371/3251	37
501Mel	GO:0031396	regulation of protein ubiquitination	90/4741	210/18723	1.96381e-08	2.86077e-06	2.39503e-06	144165/23551/65018/26232/23077/11337/23376/7189/754/3300/5581/10273/120892/5728/11261/3984/25/8915/78990/553115/7466/55743/2475/7375/5663/339745/5601/7965/23328/1020/51160/8945/10075/6659/165324/56254/2729/2874/2295/6188/6502/57561/1616/672/6209/9112/23560/80279/11146/84259/6224/151636/2534/139285/868/991/55294/6135/10196/6201/3320/8312/11065/6125/6167/7046/5347/408/9349/4869/64359/8864/22976/953…	90
501Mel	GO:0000075	cell cycle checkpoint signaling	76/4741	169/18723	2.09117e-08	2.97707e-06	2.4924e-06	26270/324/1112/7157/10116/55743/64859/2074/84936/6659/9344/1027/5371/65123/5514/25906/4193/54465/56984/10403/79035/672/54888/9984/27339/83695/80279/983/51720/55795/84444/8883/83990/55055/79621/11073/699/51065/472/11130/79968/54908/63967/5347/1111/8914/7175/51514/9656/6154/9319/1063/7272/55755/1763/81620/891/990/55159/4998/701/54962/1843/4085/9212/9735/2177/7517/90381/146956/11200/641/8318/1263/59…	76
501Mel	GO:0042176	regulation of protein catabolic process	148/4741	391/18723	2.25568e-08	3.09679e-06	2.59263e-06	144165/348/9104/83547/65018/10444/9604/22933/2185/4905/23077/84074/255488/11337/113451/23376/5476/54467/5566/302/9827/7077/754/23192/3300/999/10273/120892/2932/324/5728/10869/114881/101/55823/22954/20/26234/51684/28951/79699/28952/11236/28996/11059/1453/55743/10755/5970/9870/6815/5663/8724/5601/11345/55070/29978/9101/10533/6811/210/4947/256471/7917/51160/8945/10075/29934/7110/369/57154/91445/1653…	148
501Mel	GO:1902749	regulation of cell cycle G2/M phase transition	52/4741	102/18723	2.27414e-08	3.09679e-06	2.59263e-06	22809/6604/1112/57099/55743/64859/5569/84936/9525/8766/9344/65123/994/5889/79035/55920/672/80279/983/51720/80169/8883/25942/8317/79621/11073/472/80174/63967/5347/8444/4869/1111/51514/22976/1063/9928/891/990/26271/995/4998/993/9212/90381/79915/2273/54984/641/7480/595/8091	52
501Mel	GO:0006302	double-strand break repair	103/4741	251/18723	3.03238e-08	4.04145e-06	3.38349e-06	10039/55317/93973/84309/79840/7157/9907/375757/78990/2072/64859/2074/55218/56941/54386/5371/5423/9400/5889/23137/79035/6117/2521/2547/80010/10038/64210/64858/672/5980/9112/27339/79728/22909/119392/7515/55183/151636/2237/51720/7486/675/9937/83990/84250/23347/8317/7518/55010/113130/157570/84515/84296/4173/254394/472/6421/253714/5932/10721/165918/2187/10635/63979/1111/8914/92797/4172/5422/9319/4174/…	103
501Mel	GO:0050000	chromosome localization	44/4741	82/18723	3.79911e-08	4.95783e-06	4.15069e-06	4000/10096/8678/51112/51115/9525/10540/8766/1778/283489/27243/150465/55143/10403/10726/23353/7013/3192/1060/3833/27436/152185/10300/113130/10615/10464/54908/9787/81929/3835/11004/83540/1063/81930/9928/81620/891/81610/55166/9212/84722/54984/1062/56776	44
501Mel	GO:0002181	cytoplasmic translation	68/4741	148/18723	4.04177e-08	5.16686e-06	4.32569e-06	64506/22849/285381/80315/27335/2475/25946/6143/51121/6231/23521/6128/51372/6188/6194/6157/2935/1660/55854/6209/6130/6176/6155/8662/6227/4736/6169/6136/6156/6165/6224/132864/6175/6228/6135/6161/6201/6164/7555/6133/11224/6173/6204/6152/3646/6218/6129/6230/6125/6223/6167/6206/6139/9349/3921/6189/6160/6233/6229/6210/9045/6154/6147/6232/6144/6235/6171/8531	68
501Mel	GO:0042273	ribosomal large subunit biogenesis	40/4741	72/18723	4.35677e-08	5.45817e-06	4.56957e-06	51018/4809/51121/4839/6128/84549/4931/9326/6838/80135/6130/23560/4736/6169/84365/23195/6165/79707/6175/26156/8886/6135/11224/6152/55153/6129/6125/81887/10969/4869/23246/51187/54663/55651/9045/6154/51154/6147/54475/55299	40
501Mel	GO:0000086	G2/M transition of mitotic cell cycle	64/4741	137/18723	4.61466e-08	5.66789e-06	4.74515e-06	6604/1112/64839/57099/808/55743/64859/5569/84936/9525/54850/8766/9344/65123/994/5889/79035/6502/55920/9024/672/9088/80279/5218/84930/983/51720/80169/284001/8883/25942/8317/79621/11073/5243/890/472/80174/1030/63967/9833/5347/1111/51514/1063/9928/891/990/26271/995/4998/993/9212/90381/11200/7465/2273/54984/641/7480/1263/595/10763/8091	64
501Mel	GO:0000725	recombinational repair	65/4741	140/18723	4.87564e-08	5.87327e-06	4.91709e-06	55317/9907/375757/2072/64859/2074/55218/54386/9400/5889/23137/79035/6117/2521/80010/64210/672/5980/79728/83695/22909/119392/7515/55183/2237/7486/675/23347/8317/55010/84515/84296/4173/254394/6421/253714/5932/10721/2187/10635/63979/1111/8914/92797/4172/4174/4175/51444/6119/4171/55159/25788/116028/4796/7517/4176/51659/5888/9401/79000/8438/7516/56154/641/8318	65
501Mel	GO:0006271	DNA strand elongation involved in DNA replication	14/4741	15/18723	5.03478e-08	5.87515e-06	4.91867e-06	54107/4173/9837/5425/4172/5422/1763/5983/5111/10714/3978/5984/4176/5426	14
501Mel	GO:0051303	establishment of chromosome localization	43/4741	80/18723	5.06479e-08	5.87515e-06	4.91867e-06	10096/8678/51112/51115/9525/10540/8766/1778/283489/27243/150465/55143/10403/10726/23353/7013/3192/1060/3833/27436/152185/10300/113130/10615/10464/54908/9787/81929/3835/11004/83540/1063/81930/9928/81620/891/81610/55166/9212/84722/54984/1062/56776	43
501Mel	GO:0045930	negative regulation of mitotic cell cycle	97/4741	235/18723	5.38947e-08	6.08386e-06	5.0934e-06	146691/23026/7077/10457/324/1112/5728/2619/7157/57099/10263/25/10201/3275/64848/55743/2296/64859/84936/596/6659/9344/1027/79027/5371/65123/5514/25906/4193/56984/23513/10403/29117/79035/58190/672/51696/80279/7040/983/51720/144455/55795/8883/5933/55055/11073/699/51065/472/11130/1030/54908/63967/5347/1111/7175/4824/1499/51514/9656/6154/9319/1063/7272/54475/55755/2146/81620/891/990/79960/55159/26271/…	97
501Mel	GO:0007093	mitotic cell cycle checkpoint signaling	61/4741	129/18723	5.43896e-08	6.08386e-06	5.0934e-06	324/1112/7157/55743/64859/84936/6659/9344/1027/5371/65123/5514/25906/4193/56984/10403/79035/672/80279/983/51720/55795/8883/55055/11073/699/51065/472/11130/54908/63967/5347/1111/7175/51514/9656/6154/9319/1063/7272/55755/81620/891/990/55159/4998/701/54962/1843/4085/9212/9735/2177/7517/90381/146956/11200/641/1263/595/8091	61
501Mel	GO:0051310	metaphase plate congression	37/4741	65/18723	5.87317e-08	6.45431e-06	5.40354e-06	8678/51112/51115/9525/10540/8766/1778/283489/27243/150465/55143/10403/10726/3192/1060/3833/27436/152185/113130/10615/10464/54908/81929/3835/11004/83540/1063/81930/9928/81620/891/81610/55166/9212/84722/54984/1062	37
501Mel	GO:0000724	double-strand break repair via homologous recombination	64/4741	138/18723	6.49206e-08	7.01142e-06	5.86995e-06	55317/9907/375757/2072/64859/2074/55218/54386/9400/5889/23137/79035/6117/2521/80010/64210/672/5980/79728/22909/119392/7515/55183/2237/7486/675/23347/8317/55010/84515/84296/4173/254394/6421/253714/5932/10721/2187/10635/63979/1111/8914/92797/4172/4174/4175/51444/6119/4171/55159/25788/116028/4796/7517/4176/51659/5888/9401/79000/8438/7516/56154/641/8318	64
501Mel	GO:1901991	negative regulation of mitotic cell cycle phase transition	78/4741	179/18723	7.24361e-08	7.5693e-06	6.337e-06	23026/10457/324/1112/5728/7157/57099/10263/3275/55743/64859/84936/596/6659/9344/1027/79027/5371/65123/25906/4193/56984/10403/29117/79035/58190/672/80279/983/51720/144455/55795/8883/5933/55055/11073/699/51065/472/11130/1030/54908/63967/5347/1111/7175/51514/6154/9319/1063/7272/55755/2146/81620/891/990/79960/55159/26271/4998/701/677/1843/4085/9212/9735/7517/90381/11200/9314/7465/2273/54984/641/1263/…	78
501Mel	GO:2001251	negative regulation of chromosome organization	45/4741	86/18723	7.25028e-08	7.5693e-06	6.337e-06	8658/324/2072/26277/23293/54386/25906/56984/10403/7013/65057/3192/7515/80169/55795/3183/5394/167227/55055/9700/699/472/11130/54908/5347/7175/7153/9319/1063/7272/55755/81620/891/4171/3178/26271/701/1843/4085/9212/9735/7517/9232/54984/80119	45
501Mel	GO:0032886	regulation of microtubule-based process	98/4741	240/18723	8.65116e-08	8.88375e-06	7.43746e-06	9104/10634/122060/57704/4131/4137/89795/10039/10382/2042/22809/8874/23299/10013/2932/324/5058/6047/10263/25/22924/4233/1213/8777/6249/23271/9525/146057/5048/636/24139/9638/8195/402/1540/1778/1027/3476/57606/27243/29105/1729/2288/6188/153241/3925/51199/672/7840/90102/79929/3192/23499/55521/10982/6491/79959/55036/91147/85458/26973/5310/126731/11076/85459/152185/9181/10300/79809/4130/403/79866/22974…	98
501Mel	GO:0031109	microtubule polymerization or depolymerization	58/4741	122/18723	9.05244e-08	9.14588e-06	7.65692e-06	344148/10634/122060/57704/4131/4137/1410/89795/10382/8874/10013/324/5058/25/22924/4233/2801/1453/57701/6249/23271/146057/24139/402/1027/57606/2288/6188/3925/51199/3796/347240/10426/79929/10982/284001/126731/11076/440145/9181/10300/4130/403/22974/10142/11004/55755/81930/221150/348235/26271/8851/146909/84722/55835/50861/2258/4133	58
501Mel	GO:0042440	pigment metabolic process	44/4741	84/18723	9.69579e-08	9.64038e-06	8.07091e-06	1638/4948/7306/10891/7390/7220/56898/6490/1497/23657/211/2235/1652/9839/645/1001/51151/200205/1352/4435/3163/4935/1244/51629/10755/3162/210/596/7299/3658/1355/283652/10857/6470/8833/353/5471/100/23596/10606/5631/4157/1371/3251	44
501Mel	GO:0043087	regulation of GTPase activity	132/4741	348/18723	1.11022e-07	1.08311e-05	9.0678e-06	11149/9104/6792/115704/65078/89846/29/5362/2185/858/23677/9910/5909/2889/5592/11153/2042/79090/9827/6000/8874/9922/6281/57186/120892/2932/125058/6494/26037/4952/2775/4233/391/10565/9779/163486/55785/54662/10999/23102/93627/57148/4649/121512/2475/10154/9270/5364/57326/54885/26073/5048/253959/23637/79735/85360/8195/402/4943/22930/1857/65125/22841/85440/23348/10979/23513/2043/3925/55920/6001/23616/5…	132
501Mel	GO:0051225	spindle assembly	56/4741	117/18723	1.12392e-07	1.08311e-05	9.0678e-06	8658/6047/9371/22924/2801/1453/9525/26073/8766/1778/27243/29127/49856/6188/90990/10735/3796/10426/3192/54930/10982/9055/57519/8243/10783/126731/259266/203068/3833/991/56647/729440/152185/440145/22974/10615/10464/3832/5347/9126/9133/4751/7175/1104/56992/115106/54801/26271/140609/4605/9212/93323/55559/11200/9493/23015	56
501Mel	GO:0032392	DNA geometric change	46/4741	90/18723	1.31029e-07	1.24359e-05	1.04113e-05	26038/84181/9400/6117/2547/1660/1105/84083/9557/5982/8607/6742/7486/83990/5985/84515/4173/254394/55636/10721/79075/54821/3181/7153/92797/4172/4174/4175/1763/5983/4171/25788/10146/3148/3146/5984/4176/5888/3159/9401/63922/440081/8438/1663/641/80119	46
501Mel	GO:1903362	regulation of cellular protein catabolic process	102/4741	255/18723	1.60273e-07	1.49843e-05	1.25448e-05	144165/348/9104/65018/10444/9604/22933/2185/84074/255488/11337/23376/54467/5566/302/9827/754/3300/10273/120892/2932/5728/10869/114881/55823/20/26234/51684/28951/79699/28952/11236/28996/1453/55743/10755/6815/5663/5601/11345/55070/29978/210/256471/7917/8945/7110/369/57154/91445/55737/25831/2729/5371/51136/4193/2295/10221/2043/55872/9686/80279/23400/51377/11146/6613/55353/3949/7341/5310/8975/139285/…	102
501Mel	GO:0046034	ATP metabolic process	109/4741	277/18723	1.65389e-07	1.52353e-05	1.27549e-05	80201/3479/4967/9605/55753/64802/65018/221264/10891/203/5313/957/5213/4702/8604/1329/5236/481/4719/27069/1497/4700/1337/3098/1738/4711/57017/79085/374291/2821/7385/7381/6392/1537/1351/7384/4697/4723/5465/9377/1327/6389/5208/92014/4720/215/523/29796/10105/27089/4698/1340/4713/6391/4722/4715/7157/226/4728/4695/54205/400916/4704/4708/5214/84277/4696/5167/10975/1345/9167/11182/5663/4731/4707/4694/134…	109
501Mel	GO:1901988	negative regulation of cell cycle phase transition	100/4741	249/18723	1.68045e-07	1.52556e-05	1.2772e-05	23026/22809/26270/10457/324/1112/5728/7157/57099/10263/323/10116/3275/55743/64859/2074/84936/596/6659/9344/1027/79027/5371/65123/5514/25906/4193/54465/56984/10403/29117/79035/58190/672/54888/9984/27339/83695/80279/983/51720/144455/55795/84444/8883/83990/5933/55055/79621/11073/699/51065/472/11130/79968/1030/54908/63967/5347/1111/8914/7175/51514/9656/6154/9319/1063/7272/55755/1763/2146/81620/891/99…	100
501Mel	GO:0006119	oxidative phosphorylation	64/4741	141/18723	1.74292e-07	1.55966e-05	1.30575e-05	65018/4702/1329/4719/27069/4700/1337/1738/4711/57017/79085/374291/7385/7381/6392/1537/1351/7384/4697/4723/9377/1327/6389/92014/4720/215/29796/10105/27089/4698/1340/4713/6391/4722/4715/4728/4695/54205/400916/4704/4708/84277/4696/10975/1345/9167/4731/4707/4694/1347/4705/4706/54949/1350/55967/1349/201626/1355/1716/983/637/4729/891/26471	64
501Mel	GO:0051348	negative regulation of transferase activity	106/4741	268/18723	1.80312e-07	1.59081e-05	1.33183e-05	9961/348/9104/6609/113791/1845/4137/26524/10039/58533/5170/2950/9479/80851/2932/324/5728/11261/10114/56940/7157/5770/5305/3984/25/79837/29085/28951/11142/5569/5663/9270/25998/1849/5576/94032/5339/3315/7026/7016/11329/4771/7251/1027/8660/5575/65125/1031/103/10221/84959/10527/7013/6209/84062/3192/104/80279/6224/151636/26973/23603/9467/868/6135/6201/153090/5580/54892/6125/5573/1030/6167/5347/11221/9…	106
501Mel	GO:0019693	ribose phosphate metabolic process	146/4741	396/18723	1.84682e-07	1.60673e-05	1.34515e-05	80201/8034/3479/5138/10861/80221/4967/9605/79873/55753/25874/55902/65018/221264/10891/203/128486/5313/957/5160/5213/8604/5164/5236/256281/254552/283927/79993/5836/3098/1738/570/108/2821/23417/32/10005/5465/5165/3155/5208/38/1737/215/523/260425/9414/8803/53354/120892/54677/79877/226/1743/79717/137964/5214/84277/5167/54995/55312/10201/50808/5162/79646/11182/51000/5663/3295/112/83549/5571/4976/13187…	146
501Mel	GO:0045732	positive regulation of protein catabolic process	94/4741	231/18723	1.90279e-07	1.62082e-05	1.35695e-05	144165/348/9104/83547/10444/9604/22933/2185/4905/255488/11337/54467/754/23192/3300/10273/120892/2932/324/5728/114881/101/55823/22954/20/26234/28951/79699/28952/11236/11059/1453/55743/9870/5663/5601/55070/29978/10533/6811/4947/7917/51160/10075/57154/91445/55737/25831/2729/1027/51079/51136/7879/257364/4193/8754/10221/9686/152503/6613/3949/7341/8975/139285/868/991/55294/3320/153090/8312/26088/5347/1…	94
501Mel	GO:0034660	ncRNA metabolic process	173/4741	485/18723	1.91477e-07	1.62082e-05	1.35695e-05	6041/4137/23053/10179/65080/92935/23395/285381/79731/8780/285605/25973/8270/5188/83707/5970/63899/138716/129563/79650/55152/27044/387338/11102/131870/54853/23438/192670/81605/112858/79979/65123/103/51018/29102/4809/25879/51013/127253/55505/4839/9188/9136/10200/6194/10607/87178/54433/84549/79954/57418/153443/8568/91801/51367/55656/51574/348180/10557/4931/54888/9326/6209/80135/6130/27292/28987/5559…	173
501Mel	GO:0050767	regulation of neurogenesis	136/4741	364/18723	1.99892e-07	1.66508e-05	1.39401e-05	443/1638/6696/6792/4747/65078/6092/23105/10512/5362/22933/4131/1954/4137/79365/3398/57556/23363/9820/23376/11344/5176/57698/406/6604/9682/2664/5728/80031/5058/7157/64689/66008/55502/22954/3984/10458/1982/659/26039/2475/10154/5970/5663/10509/5364/1523/5048/4976/23011/1020/9798/9572/4124/4771/8766/57609/1605/85440/6497/10413/1495/10505/5584/51188/2043/58190/6498/29904/23013/51199/5365/10371/3091/23…	136
501Mel	GO:1901987	regulation of cell cycle phase transition	144/4741	390/18723	2.02022e-07	1.66508e-05	1.39401e-05	22933/23026/3373/3398/22809/6604/26270/10457/324/1112/5728/7157/57099/23276/10263/323/10116/3275/55743/64859/5569/2074/493/84936/9525/596/8766/6659/9344/1027/79027/5371/65123/5514/25906/4193/7027/54465/56984/994/5889/10403/81853/29117/79035/58190/55920/672/54888/9984/27339/83695/80279/983/51720/10783/80169/144455/55795/5310/84444/8883/55294/83990/5933/25942/55055/8317/9700/79621/113130/11073/699/…	144
501Mel	GO:0016236	macroautophagy	113/4741	291/18723	2.22518e-07	1.79049e-05	1.49899e-05	58476/23130/26353/10133/823/65018/55187/291/7957/53349/155066/11178/11337/79443/9517/58533/90678/23274/340371/23376/55763/10254/9114/5566/23339/23192/535/23710/523/10013/826/51368/51100/9927/25851/120892/4534/8678/54832/7157/51382/57192/23241/5305/79837/3064/9779/60412/23265/9842/9342/3920/292/23001/2475/5861/81631/3162/55102/5663/27072/11345/8992/29978/9525/10533/26073/256471/1020/81876/51160/14…	113
501Mel	GO:0051960	regulation of nervous system development	160/4741	443/18723	2.24092e-07	1.79049e-05	1.49899e-05	443/1638/6696/6792/4747/745/65078/6092/23105/10512/158038/3687/5915/23175/5362/22933/4131/1954/4137/8604/79365/3398/57556/23363/9820/23376/11344/5176/57698/406/6604/9682/2664/22871/5728/80031/5058/7157/64689/66008/55502/22954/3984/10458/1982/659/26039/2475/10154/5970/9896/5663/10509/5364/1523/5048/4976/23011/1020/9798/9572/4124/23767/4771/8766/57609/1605/85440/6497/10413/1495/10505/5584/51188/204…	160
501Mel	GO:0010389	regulation of G2/M transition of mitotic cell cycle	47/4741	94/18723	2.25812e-07	1.79049e-05	1.49899e-05	6604/1112/57099/55743/64859/5569/84936/9525/8766/9344/65123/994/5889/79035/55920/672/80279/983/51720/80169/8883/25942/8317/79621/11073/472/80174/63967/5347/1111/51514/1063/9928/891/990/26271/995/4998/993/9212/90381/2273/54984/641/7480/595/8091	47
501Mel	GO:0072329	monocarboxylic acid catabolic process	57/4741	122/18723	2.44461e-07	1.91413e-05	1.60251e-05	197257/1384/35/1666/2110/80724/23175/3032/1962/30/56898/112817/254552/283927/5264/34/23417/32/10005/5465/10449/38/10994/215/64900/2108/1376/8310/6342/1892/54677/1374/549/3030/5095/1891/23659/51/10999/219743/83752/2475/3295/1632/5828/3033/8660/390916/3712/5096/2184/171586/10478/26061/9942/10327/84879	57
501Mel	GO:0045839	negative regulation of mitotic nuclear division	29/4741	48/18723	2.75314e-07	2.1291e-05	1.78248e-05	146691/324/10201/25906/56984/10403/55795/55055/699/472/11130/54908/5347/1111/7175/9319/1063/7272/55755/81620/891/26271/27085/701/1843/4085/9212/9735/7517	29
501Mel	GO:0044786	cell cycle DNA replication	26/4741	41/18723	2.91776e-07	2.22888e-05	1.86602e-05	7013/2237/144455/7486/675/8317/64785/4173/80174/51053/9837/4172/5422/4175/1763/81620/4171/26271/10926/5111/3978/54962/79733/5888/641/8318	26
501Mel	GO:0046395	carboxylic acid catabolic process	95/4741	236/18723	2.98008e-07	2.24906e-05	1.88291e-05	443/197257/5625/18/1384/35/113675/2805/1666/2110/36/80724/137872/4329/23175/3176/3032/11112/1962/4143/30/56898/112817/254552/283927/5264/80150/34/55577/23417/32/27034/8659/2752/10005/5465/56922/3155/10449/9673/38/593/10994/215/64900/2108/1376/8310/2954/6342/1892/54677/1374/549/23475/3030/1743/5095/2806/1891/23659/51/10999/219743/138199/83752/2475/3295/493/1632/5828/132789/3033/8660/390916/3712/50…	95
501Mel	GO:1901990	regulation of mitotic cell cycle phase transition	115/4741	299/18723	3.12358e-07	2.3293e-05	1.95008e-05	22933/23026/3373/3398/6604/10457/324/1112/5728/7157/57099/23276/10263/3275/55743/64859/5569/84936/9525/596/8766/6659/9344/1027/79027/5371/65123/25906/4193/7027/56984/994/5889/10403/81853/29117/79035/58190/55920/672/80279/983/51720/10783/80169/144455/55795/5310/8883/5933/25942/55055/8317/9700/79621/113130/11073/699/51065/472/11065/80174/11130/1030/54908/9787/63967/637/5347/1111/7175/8558/51514/615…	115
501Mel	GO:2000278	regulation of DNA biosynthetic process	51/4741	106/18723	3.32249e-07	2.44848e-05	2.04986e-05	9104/2185/10039/79618/8658/7157/26277/659/23293/5609/10576/7027/11232/8550/4931/7013/65057/3192/5982/92345/10728/80169/3183/5394/167227/5985/3320/10694/472/3184/79075/4751/3181/1499/3776/5983/3178/140609/1736/5111/1843/5984/9212/27000/409/9314/63922/54984/80119/2264/4609	51
501Mel	GO:0033047	regulation of mitotic sister chromatid segregation	28/4741	46/18723	3.54493e-07	2.58203e-05	2.16167e-05	324/8678/25906/56984/10403/3192/55795/55055/699/472/11130/54908/5347/7175/9319/1063/7272/55755/81620/891/26271/701/1843/4085/9212/9735/7517/9232	28
501Mel	GO:0031577	spindle checkpoint signaling	25/4741	39/18723	3.65142e-07	2.60507e-05	2.18096e-05	324/55743/25906/56984/10403/55795/55055/699/472/11130/54908/5347/7175/9319/1063/7272/55755/81620/891/701/1843/4085/9212/9735/7517	25
501Mel	GO:0016054	organic acid catabolic process	96/4741	240/18723	3.65974e-07	2.60507e-05	2.18096e-05	443/197257/5625/18/1384/35/113675/2805/1666/2110/36/80724/137872/4329/23175/3176/3032/11112/1962/4143/30/56898/112817/254552/283927/5264/80150/34/55577/23417/32/27034/8659/2752/10005/5465/56922/3155/10449/9673/38/593/10994/215/64900/2108/1376/8310/2954/6342/1892/54677/7263/1374/549/23475/3030/1743/5095/2806/1891/23659/51/10999/219743/138199/83752/2475/3295/493/1632/5828/132789/3033/8660/390916/37…	96
501Mel	GO:0006635	fatty acid beta-oxidation	39/4741	74/18723	4.15027e-07	2.92105e-05	2.4455e-05	1384/35/1666/2110/80724/3032/1962/30/56898/34/23417/32/10005/5465/10449/38/215/2108/1376/8310/6342/1892/54677/1374/549/3030/1891/51/219743/83752/2475/3295/1632/5828/3033/8660/3712/10478/84879	39
501Mel	GO:0006582	melanin metabolic process	18/4741	24/18723	4.68592e-07	3.2614e-05	2.73044e-05	1638/4948/7306/7220/6490/1497/23657/1652/9839/1001/51151/4435/10755/596/7299/283652/23596/4157	18
501Mel	GO:0033045	regulation of sister chromatid segregation	38/4741	72/18723	5.55205e-07	3.80208e-05	3.18309e-05	324/8678/55743/25906/56984/10403/3192/64682/10783/55795/55055/9700/699/472/11065/10460/11130/54908/9787/5347/7175/9319/1063/7272/55755/81620/891/990/26271/116028/701/1843/4085/9212/9735/7517/9232/1062	38
501Mel	GO:0006084	acetyl-CoA metabolic process	23/4741	35/18723	5.58415e-07	3.80208e-05	3.18309e-05	25874/55902/5160/5164/254552/283927/1738/23417/32/5165/38/1737/1743/79717/5162/8050/3157/2194/51166/5163/134526/5166/6999	23
501Mel	GO:1902100	negative regulation of metaphase/anaphase transition of cell cycle	26/4741	42/18723	5.81214e-07	3.91476e-05	3.27743e-05	324/55743/25906/56984/10403/55795/55055/699/472/11130/54908/5347/7175/9319/1063/7272/55755/81620/891/26271/701/1843/4085/9212/9735/7517	26
501Mel	GO:0051983	regulation of chromosome segregation	45/4741	91/18723	6.06427e-07	4.04112e-05	3.38322e-05	22933/324/8678/55743/25906/56984/10403/23137/55920/3192/64682/10783/55795/55055/9700/699/157313/56852/472/11065/10460/11130/54908/9787/5347/7175/11004/9319/1063/7272/55755/81620/891/990/26271/116028/701/1843/4085/9212/9735/7517/9232/4288/1062	45
501Mel	GO:0051306	mitotic sister chromatid separation	36/4741	67/18723	6.17784e-07	4.07347e-05	3.4103e-05	324/129563/25906/56984/10403/29781/64682/10783/55795/55055/9700/699/472/11065/10460/11130/54908/9787/5347/7175/9319/1063/7272/55755/81620/891/990/26271/701/1843/4085/9212/9735/7517/9232/1062	36
501Mel	GO:0031397	negative regulation of protein ubiquitination	42/4741	83/18723	6.46145e-07	4.2161e-05	3.52971e-05	23551/23376/5581/11261/3984/25/78990/2475/7375/5663/339745/1020/51160/6659/2729/2874/6188/6209/23560/11146/6224/151636/2534/6135/10196/6201/6125/6167/408/9349/64359/8864/9532/26271/9636/4085/10625/409/4092/54984/7128/10253	42
501Mel	GO:0051988	regulation of attachment of spindle microtubules to kinetochore	12/4741	13/18723	6.85464e-07	4.42655e-05	3.7059e-05	22933/324/8678/29127/55920/3192/90417/1894/10615/4751/891/9212	12
501Mel	GO:0016050	vesicle organization	114/4741	300/18723	7.14622e-07	4.56775e-05	3.82411e-05	6616/57586/10815/83547/5864/10981/7306/2060/6812/6855/5873/6385/6844/858/6490/55654/79090/57617/1173/10254/51479/10497/399687/80208/23339/302/55111/9839/399979/8406/6281/1759/11261/10564/6845/9632/22872/5305/55823/9765/8729/4935/8615/553115/9842/9342/8907/6272/1453/5861/1182/23208/9341/5007/8724/27072/81555/26276/9527/9101/9525/6811/23023/5048/64400/29916/164/54809/51160/9798/149371/596/84286/711…	114
501Mel	GO:0045841	negative regulation of mitotic metaphase/anaphase transition	25/4741	40/18723	7.39223e-07	4.67726e-05	3.9158e-05	324/25906/56984/10403/55795/55055/699/472/11130/54908/5347/7175/9319/1063/7272/55755/81620/891/26271/701/1843/4085/9212/9735/7517	25
501Mel	GO:0006790	sulfur compound metabolic process	126/4741	339/18723	7.6319e-07	4.78062e-05	4.00233e-05	64131/10861/11046/80221/4967/10768/6821/25874/337876/373156/55902/55256/128486/2948/4482/5160/23382/4143/5164/9027/26873/4524/254552/283927/79094/3373/79993/27010/119391/1497/64780/80142/1738/570/6487/23657/23417/32/81689/55501/10005/9054/56922/10090/5165/3155/6819/38/3340/1737/2950/215/2799/2941/8803/2954/7358/7263/2686/57019/1743/3029/79717/137964/7849/200205/5167/54995/1244/29940/686/3141/5162…	126
501Mel	GO:0031023	microtubule organizing center organization	63/4741	143/18723	7.92287e-07	4.91375e-05	4.11378e-05	22809/9371/2801/8777/9525/5048/402/84552/27243/11190/10403/124093/9738/153241/284403/51199/9648/672/7840/54930/345643/9851/6491/22995/79959/91147/983/282809/117178/1070/26973/284001/675/729440/85459/152185/22994/9662/3832/5347/4869/1111/4751/1499/163786/115106/55755/4957/54801/899/10733/2648/93323/7517/5902/55559/55835/55722/84612/7516/8850/54828/9696	63
501Mel	GO:0051985	negative regulation of chromosome segregation	27/4741	45/18723	8.6268e-07	5.19599e-05	4.35007e-05	324/55743/25906/56984/10403/55795/55055/699/472/11130/54908/5347/7175/9319/1063/7272/55755/81620/891/26271/701/1843/4085/9212/9735/7517/9232	27
501Mel	GO:0098534	centriole assembly	27/4741	45/18723	8.6268e-07	5.19599e-05	4.35007e-05	9525/27243/124093/9738/153241/284403/672/7840/345643/9851/6491/22995/79959/282809/284001/729440/85459/152185/9662/4869/163786/55755/10733/2648/55835/55722/8850	27
501Mel	GO:1905819	negative regulation of chromosome separation	27/4741	45/18723	8.6268e-07	5.19599e-05	4.35007e-05	324/55743/25906/56984/10403/55795/55055/699/472/11130/54908/5347/7175/9319/1063/7272/55755/81620/891/26271/701/1843/4085/9212/9735/7517/9232	27
501Mel	GO:0010975	regulation of neuron projection development	158/4741	445/18723	8.83194e-07	5.26888e-05	4.4111e-05	547/6616/5274/348/6696/5526/6792/1141/4747/65078/6092/23105/10512/23373/1272/5362/2185/4131/1954/4137/23242/8837/11178/3956/2889/2042/57556/3675/23363/10938/9820/11344/5176/57698/10090/2896/2664/411/9139/22871/7431/120892/2932/5728/80031/54664/5058/64689/66008/26037/3984/10458/1982/659/26039/57498/2475/10154/5911/9896/160/5663/8724/112/81545/23271/10509/5364/1523/5048/4976/23011/1020/9798/9638/87…	158
501Mel	GO:0009896	positive regulation of catabolic process	172/4741	492/18723	9.15691e-07	5.32462e-05	4.45776e-05	58476/144165/348/9104/3479/26353/83547/23530/10133/2021/65018/10444/55187/9604/22933/957/2185/291/4905/55128/7957/255488/11337/23677/10140/79443/9517/90678/23376/54467/23053/253943/5465/754/23192/3300/215/22849/5581/400410/51099/51100/9528/10273/120892/2932/324/5728/8678/1374/114881/5770/101/5305/55823/22954/20/79837/3064/207063/26234/28951/79699/28952/11236/53373/292/11059/1453/55743/9870/3162/5…	172
501Mel	GO:0007080	mitotic metaphase plate congression	29/4741	50/18723	9.23153e-07	5.32462e-05	4.45776e-05	8678/51115/9525/10540/8766/283489/27243/55143/10403/10726/3192/1060/3833/27436/113130/10464/54908/81929/3835/11004/83540/81930/9928/81620/891/9212/84722/54984/1062	29
501Mel	GO:0007094	mitotic spindle assembly checkpoint signaling	24/4741	38/18723	9.35038e-07	5.32462e-05	4.45776e-05	324/25906/56984/10403/55795/55055/699/472/11130/54908/5347/7175/9319/1063/7272/55755/81620/891/701/1843/4085/9212/9735/7517	24
501Mel	GO:0071173	spindle assembly checkpoint signaling	24/4741	38/18723	9.35038e-07	5.32462e-05	4.45776e-05	324/25906/56984/10403/55795/55055/699/472/11130/54908/5347/7175/9319/1063/7272/55755/81620/891/701/1843/4085/9212/9735/7517	24
501Mel	GO:0071174	mitotic spindle checkpoint signaling	24/4741	38/18723	9.35038e-07	5.32462e-05	4.45776e-05	324/25906/56984/10403/55795/55055/699/472/11130/54908/5347/7175/9319/1063/7272/55755/81620/891/701/1843/4085/9212/9735/7517	24
501Mel	GO:1903829	positive regulation of cellular protein localization	106/4741	276/18723	9.6495e-07	5.43428e-05	4.54957e-05	3745/54550/22885/6769/65018/10347/4137/3717/288/2042/3675/57506/5170/125170/163/5581/51100/999/245812/2932/324/11261/57214/5058/55823/54471/391/65267/25921/51112/55929/4641/5296/23208/3728/5663/493/9270/6721/3985/1020/636/51160/7016/10075/8766/27032/7251/22841/55072/257364/10413/10576/54741/11190/10979/5584/10403/54434/51574/5901/10204/7855/5583/5621/80279/7040/151636/1894/983/2534/3688/55294/949…	106
501Mel	GO:0032508	DNA duplex unwinding	42/4741	84/18723	9.7729e-07	5.43428e-05	4.54957e-05	26038/84181/9400/6117/2547/1660/1105/9557/5982/8607/6742/7486/83990/5985/84515/4173/254394/55636/10721/79075/54821/7153/92797/4172/4174/4175/1763/5983/4171/25788/10146/5984/4176/5888/3159/9401/63922/440081/8438/1663/641/80119	42
501Mel	GO:1903321	negative regulation of protein modification by small protein conjugation or removal	46/4741	95/18723	9.81465e-07	5.43428e-05	4.54957e-05	23551/23376/5581/11261/3984/25/78990/2475/5970/7375/5663/339745/1020/51160/825/6659/2729/2874/6188/6209/23560/11146/6224/151636/2534/10362/6135/10196/6201/6125/6167/408/9349/64359/1499/8864/9532/26271/9636/4085/10625/409/4092/54984/7128/10253	46
501Mel	GO:0006403	RNA localization	82/4741	201/18723	9.88997e-07	5.43428e-05	4.54957e-05	9961/9883/8658/23299/7048/7263/56648/23293/4641/6830/3800/636/100101267/25946/10576/55505/23165/87178/1660/54888/5433/9326/7013/9984/5901/6426/10204/3192/23279/10762/6428/79023/92345/8607/399664/84324/23225/1070/220988/10212/55795/5394/167227/10644/10694/9631/472/57187/81929/4869/10642/7884/79902/55110/64901/53371/7175/84321/25909/3181/57122/55651/26019/55011/29107/4116/6432/9908/10189/4927/3178/…	82
501Mel	GO:0070482	response to oxygen levels	128/4741	347/18723	9.98165e-07	5.43696e-05	4.55181e-05	7042/18/2034/1141/2021/65018/10891/7423/5313/6648/537/4000/22933/29988/2185/64506/2113/1410/4524/8837/8994/481/112399/10397/23409/84317/10370/9114/9131/5465/5165/10449/1139/4720/523/5581/25828/5352/6548/10273/5728/7048/8678/10869/5058/7157/80315/101/847/54471/3163/28996/2475/3162/10533/210/824/4976/596/26355/1027/55662/5371/5423/26608/4193/317/158/57085/191/23545/29904/3091/7515/2627/6839/10135/7…	128
501Mel	GO:0016241	regulation of macroautophagy	62/4741	141/18723	1.04591e-06	5.64793e-05	4.72844e-05	26353/10133/823/65018/55187/291/7957/155066/11178/79443/9517/58533/90678/23274/340371/55763/9114/5566/535/523/10013/826/51100/120892/4534/8678/54832/7157/51382/5305/79837/3064/60412/23265/292/2475/3162/8992/29978/26073/1020/149371/51606/9638/10241/4864/4943/22930/55737/60592/112936/29110/5768/55254/23545/3091/23400/203228/27131/8851/26471/90423	62
501Mel	GO:0033046	negative regulation of sister chromatid segregation	26/4741	43/18723	1.11581e-06	5.87349e-05	4.91727e-05	324/25906/56984/10403/55795/55055/699/472/11130/54908/5347/7175/9319/1063/7272/55755/81620/891/26271/701/1843/4085/9212/9735/7517/9232	26
501Mel	GO:0033048	negative regulation of mitotic sister chromatid segregation	26/4741	43/18723	1.11581e-06	5.87349e-05	4.91727e-05	324/25906/56984/10403/55795/55055/699/472/11130/54908/5347/7175/9319/1063/7272/55755/81620/891/26271/701/1843/4085/9212/9735/7517/9232	26
501Mel	GO:2000816	negative regulation of mitotic sister chromatid separation	26/4741	43/18723	1.11581e-06	5.87349e-05	4.91727e-05	324/25906/56984/10403/55795/55055/699/472/11130/54908/5347/7175/9319/1063/7272/55755/81620/891/26271/701/1843/4085/9212/9735/7517/9232	26
501Mel	GO:0044550	secondary metabolite biosynthetic process	18/4741	25/18723	1.27535e-06	6.65731e-05	5.57349e-05	1638/4948/7306/7220/56898/6490/1497/23657/1652/9839/1001/51151/4435/10755/7299/283652/23596/4157	18
501Mel	GO:0009259	ribonucleotide metabolic process	139/4741	385/18723	1.39747e-06	7.12972e-05	5.96899e-05	80201/8034/3479/5138/10861/80221/4967/9605/79873/55753/25874/55902/65018/221264/10891/203/128486/5313/957/5160/5213/8604/5164/5236/254552/283927/79993/3098/1738/570/108/2821/23417/32/10005/5465/5165/3155/5208/38/1737/215/523/260425/9414/8803/53354/120892/54677/79877/226/1743/79717/137964/5214/84277/5167/54995/55312/10201/50808/5162/79646/11182/51000/5663/3295/112/83549/5571/4976/131870/84836/1395…	139
501Mel	GO:0042438	melanin biosynthetic process	17/4741	23/18723	1.39999e-06	7.12972e-05	5.96899e-05	1638/4948/7306/7220/6490/1497/23657/1652/9839/1001/51151/4435/10755/7299/283652/23596/4157	17
501Mel	GO:0051383	kinetochore organization	17/4741	23/18723	1.39999e-06	7.12972e-05	5.96899e-05	6047/51112/10403/80152/10592/1060/9787/10051/83540/1063/64105/81620/1058/387103/9735/64946/1062	17
501Mel	GO:0051052	regulation of DNA metabolic process	131/4741	359/18723	1.46225e-06	7.32825e-05	6.1352e-05	9104/11105/7292/64802/2021/10891/2185/10039/79618/8658/9131/84309/400410/7157/78990/2072/26277/659/23293/6830/2074/7644/4437/56941/23201/5609/57332/54386/5371/5514/9400/54726/10576/7027/6188/79035/57418/2521/11232/64210/1660/8550/672/4931/7013/9984/65057/3192/221656/84083/7515/7040/5982/10419/3838/55183/92345/151636/6018/51720/10728/54069/80169/5558/3183/7486/5394/4297/84250/167227/23347/5985/550…	131
501Mel	GO:0051444	negative regulation of ubiquitin-protein transferase activity	15/4741	19/18723	1.46237e-06	7.32825e-05	6.1352e-05	3984/25/5663/6209/6224/151636/6135/6201/6125/6167/9349/9532/26271/4085/4092	15
501Mel	GO:0008654	phospholipid biosynthetic process	98/4741	253/18723	1.56612e-06	7.78586e-05	6.51831e-05	80235/9306/8503/128486/23175/5833/56894/23167/9517/9468/5298/5130/55650/63874/55224/3628/129303/84947/54344/51099/5728/4534/10555/8835/11261/9807/79947/137964/9600/5305/57515/4952/20/79837/9926/22908/93210/8395/79575/56895/256987/26751/5296/9896/8760/285172/824/51447/84720/23396/93183/5297/65258/145567/55697/56848/3157/2224/22979/51205/171586/55500/10351/5338/116150/166929/5283/8867/254531/160851…	98
501Mel	GO:0000079	regulation of cyclin-dependent protein serine/threonine kinase activity	45/4741	94/18723	1.90634e-06	9.40259e-05	7.87183e-05	27013/26524/324/5728/22924/10983/7026/1027/79616/1031/11140/54619/10527/9088/902/23560/80279/1022/57018/5310/56647/890/898/1030/1033/5347/9133/1163/891/3843/990/899/51191/995/8851/993/84722/7023/3087/1029/641/1164/8850/595/7128	45
501Mel	GO:0031331	positive regulation of cellular catabolic process	151/4741	427/18723	1.99066e-06	9.74178e-05	8.1558e-05	58476/144165/348/9104/3479/26353/23530/10133/2021/65018/10444/55187/9604/22933/957/2185/291/55128/7957/255488/11337/23677/10140/79443/9517/90678/23376/54467/23053/253943/5465/754/3300/215/22849/400410/51099/51100/9528/10273/120892/2932/5728/8678/1374/114881/5770/101/5305/55823/20/79837/3064/207063/26234/28951/79699/28952/11236/53373/292/1453/55743/3162/5663/5601/129563/55070/29978/10533/7917/1024…	151
501Mel	GO:0072698	protein localization to microtubule cytoskeleton	30/4741	54/18723	2.09453e-06	0.000101707	8.51487e-05	10634/2932/324/22924/1453/10540/146057/636/283489/23386/49856/11190/1729/9857/3192/10982/9851/6491/4130/51134/10615/10464/22994/29887/58489/7272/81610/64770/55722/9585	30
501Mel	GO:0048675	axon extension	54/4741	120/18723	2.14888e-06	0.000103543	8.66858e-05	348/6792/65078/10512/3913/4131/1954/7414/4137/10439/57556/9201/11344/57698/80208/2664/4692/2932/80031/5058/3984/25/1982/659/10509/5048/23011/1020/8766/57609/150465/10505/10371/23499/6259/3688/25942/9353/3320/203228/223117/10501/1808/4825/2803/8851/9423/10507/6585/6405/54910/56920/214/4133	54
501Mel	GO:1902751	positive regulation of cell cycle G2/M phase transition	20/4741	30/18723	2.21288e-06	0.000105813	8.85865e-05	6604/9525/8766/994/5889/55920/983/25942/8317/80174/8444/4869/51514/891/26271/995/993/79915/7480/595	20
501Mel	GO:0034504	protein localization to nucleus	109/4741	290/18723	2.2642e-06	0.000107447	8.99542e-05	144165/9670/10347/4000/9679/56957/26524/3717/9201/255919/9883/2752/57506/754/9500/166614/999/120892/2932/11261/7157/400916/51684/1408/55929/23568/11142/5296/5569/3728/5663/3985/9913/1020/7016/402/4771/25885/100101267/5371/5514/84897/51569/10413/54971/4193/10576/83860/1495/1871/10979/9258/10527/51574/23353/4931/5901/10204/3192/80279/10762/23400/7040/3838/151636/5530/1894/983/2534/7341/3621/7486/86…	109
501Mel	GO:0019395	fatty acid oxidation	48/4741	103/18723	2.31503e-06	0.000109033	9.12821e-05	1384/35/1666/2110/10891/80724/3032/1962/30/56898/5264/23409/34/23417/32/10005/5465/10449/38/10994/215/2108/1376/8310/5447/6342/1892/54677/1374/549/3030/1891/51/219743/83752/2475/3295/1632/5828/3033/8660/3712/10478/26061/8013/114757/84879/5166	48
501Mel	GO:0033260	nuclear DNA replication	23/4741	37/18723	2.36051e-06	0.000110345	9.23806e-05	7013/2237/7486/675/8317/64785/4173/80174/51053/9837/4172/5422/4175/1763/81620/4171/10926/5111/3978/54962/5888/641/8318	23
501Mel	GO:0007091	metaphase/anaphase transition of mitotic cell cycle	33/4741	62/18723	2.381e-06	0.000110478	9.24924e-05	324/25906/56984/10403/64682/10783/55795/55055/9700/699/472/11065/10460/11130/54908/9787/5347/7175/9319/1063/7272/55755/81620/891/990/26271/701/1843/4085/9212/9735/7517/1062	33
501Mel	GO:0044282	small molecule catabolic process	135/4741	376/18723	2.7601e-06	0.000127127	0.000106431	443/197257/5625/348/18/1384/35/113675/2805/221/1666/2110/217/4835/36/80724/137872/4329/23175/3176/3032/5213/1593/11112/8604/1962/4143/30/56898/112817/254552/283927/5264/80150/3098/219/34/55577/23417/32/27034/8659/2752/25953/6652/10005/3628/5465/56922/3155/10449/9673/5208/38/593/10994/215/64900/2108/1376/8310/161823/2954/5728/6342/1892/54677/7263/1374/7157/549/23475/3030/130589/1743/5095/3029/5214…	135
501Mel	GO:0010965	regulation of mitotic sister chromatid separation	34/4741	65/18723	2.82608e-06	0.00012828	0.000107395	324/25906/56984/10403/64682/10783/55795/55055/9700/699/472/11065/10460/11130/54908/9787/5347/7175/9319/1063/7272/55755/81620/891/990/26271/701/1843/4085/9212/9735/7517/9232/1062	34
501Mel	GO:0044784	metaphase/anaphase transition of cell cycle	34/4741	65/18723	2.82608e-06	0.00012828	0.000107395	324/55743/25906/56984/10403/64682/10783/55795/55055/9700/699/472/11065/10460/11130/54908/9787/5347/7175/9319/1063/7272/55755/81620/891/990/26271/701/1843/4085/9212/9735/7517/1062	34
501Mel	GO:0008608	attachment of spindle microtubules to kinetochore	22/4741	35/18723	3.0006e-06	0.000135221	0.000113207	22933/324/8678/51115/283489/29127/10403/55920/3192/90417/1894/1060/27436/10615/81929/4751/11004/83540/81620/891/9212/1062	22
501Mel	GO:0061564	axon development	162/4741	467/18723	3.162e-06	0.000141477	0.000118444	348/6696/5354/6792/1141/4747/65078/3911/6092/23105/5864/10512/3913/6812/5362/4131/1954/7414/4137/23077/23242/10439/3717/288/2042/57556/25806/9201/11344/57698/80208/10090/1267/2896/2664/10939/4692/10013/9315/2932/5728/80031/5058/66008/26037/22954/3984/25/10458/391/1982/4685/659/4684/10154/3800/10890/5663/23271/10509/5364/5048/23011/1020/9798/596/23767/9638/8766/2297/57609/9344/1605/85440/91137/113…	162
501Mel	GO:0010212	response to ionizing radiation	63/4741	148/18723	3.27111e-06	0.000145321	0.000121662	6609/1410/578/79840/7157/143570/375757/64859/2074/210/598/596/5371/65123/5423/10413/4193/1936/3428/79035/388/2547/6240/672/9112/83695/221927/1894/10135/51720/7486/675/7518/11073/1196/472/581/165918/1788/10635/63979/6154/22976/55159/25788/50507/2177/5888/90381/11200/1789/121457/2138/10276/8438/7516/641/64782/3383/595/4609/1958/8091	63
501Mel	GO:0006275	regulation of DNA replication	49/4741	107/18723	3.3999e-06	0.000149979	0.000125562	27154/7157/7126/5518/10533/5001/57418/11232/57695/1660/7013/23560/345643/84083/8412/5982/983/6742/80169/144455/7270/6282/675/8317/5985/157570/890/64061/80174/9126/5930/79075/51053/8914/1763/5983/81620/990/26271/10926/5111/3399/54962/79733/5984/90381/79915/63922/641	49
501Mel	GO:0036293	response to decreased oxygen levels	118/4741	322/18723	3.75376e-06	0.00016443	0.000137661	7042/18/2034/1141/2021/65018/10891/7423/5313/6648/4000/22933/29988/2185/64506/2113/1410/4524/8837/8994/481/112399/10397/23409/10370/9131/5465/5165/10449/1139/5581/25828/5352/6548/10273/5728/7048/8678/10869/5058/7157/80315/101/847/54471/3163/28996/2475/3162/210/824/4976/596/26355/1027/55662/5371/26608/4193/317/158/57085/191/29904/3091/7515/2627/6839/10135/7043/132864/5351/83990/890/1788/29923/7351…	118
501Mel	GO:0022616	DNA strand elongation	16/4741	22/18723	4.12456e-06	0.000179418	0.000150209	64858/54107/4173/9837/5425/4172/5422/1763/5983/5111/10714/3978/5984/4176/5426/7015	16
501Mel	GO:1903364	positive regulation of cellular protein catabolic process	65/4741	155/18723	4.24139e-06	0.000183228	0.000153398	144165/348/9104/10444/9604/22933/2185/255488/11337/54467/754/3300/10273/120892/2932/5728/114881/55823/20/26234/28951/79699/28952/11236/1453/55743/5663/5601/55070/29978/7917/57154/91445/55737/25831/2729/51136/4193/10221/9686/6613/3949/7341/8975/139285/991/55294/3320/153090/8312/5347/1601/85409/9532/4780/4478/975/26471/84900/4092/57761/1263/863/7128/51339	65
501Mel	GO:0045787	positive regulation of cell cycle	115/4741	313/18723	4.30421e-06	0.000184668	0.000154604	7042/3479/11105/1845/22933/6926/3373/100381270/10370/6604/5581/8678/10869/5578/23276/22954/25/9371/22924/23326/64848/10755/9525/26073/5048/131870/8766/1778/1027/5514/150465/29127/4193/7027/994/5889/10403/23137/153241/55920/79848/9984/3192/83695/9236/2237/1894/983/144455/55795/284001/5310/675/25942/84250/8317/9700/85459/113130/1977/10615/11065/6421/80174/5641/9787/10635/8444/4869/1111/1163/7175/85…	115
501Mel	GO:0006085	acetyl-CoA biosynthetic process	14/4741	18/18723	4.59513e-06	0.000195809	0.000163931	25874/55902/5160/5164/1738/23417/5165/38/1737/79717/5162/8050/5163/5166	14
501Mel	GO:0051438	regulation of ubiquitin-protein transferase activity	29/4741	53/18723	4.66199e-06	0.000196767	0.000164733	65018/10273/5728/3984/25/10116/5663/8945/57561/6209/84259/6224/151636/991/55294/6135/6201/8312/11065/6125/6167/5347/9349/9532/27338/26271/4085/4092/57761	29
501Mel	GO:0034440	lipid oxidation	49/4741	108/18723	4.70421e-06	0.000196767	0.000164733	1384/35/1666/2110/10891/80724/3032/1962/30/56898/5264/23409/34/23417/32/10005/5465/10449/38/10994/215/2108/1376/8310/5447/6342/1892/54677/1374/549/3030/1891/51/219743/83752/2475/3295/1632/5828/3033/8660/3712/10478/26061/8013/114757/84879/347/5166	49
501Mel	GO:0001666	response to hypoxia	113/4741	307/18723	4.71185e-06	0.000196767	0.000164733	7042/18/2034/1141/2021/65018/10891/7423/5313/6648/4000/22933/29988/2185/64506/2113/1410/4524/8837/8994/481/112399/10397/23409/10370/5465/5165/10449/1139/5581/25828/5352/6548/10273/5728/7048/8678/10869/5058/7157/101/847/54471/3163/28996/2475/3162/210/824/4976/596/26355/1027/55662/5371/26608/4193/317/158/57085/191/3091/7515/2627/6839/7043/132864/5351/83990/890/1788/29923/7351/30001/7184/4824/100/17…	113
501Mel	GO:0006753	nucleoside phosphate metabolic process	170/4741	497/18723	4.75536e-06	0.000197269	0.000165153	80201/8034/3479/23057/5138/10861/80221/4967/9605/79873/55753/25874/64802/55902/65018/221264/10891/203/128486/5313/957/5160/56953/5213/8604/5164/5236/256281/254552/283927/79993/3098/1738/570/108/27231/7084/2821/23417/32/10005/5465/5165/3155/5208/1267/38/1737/215/523/260425/9414/161823/8803/53354/120892/54677/79877/23475/226/1743/79717/137964/5214/84277/5167/54995/55312/10201/50808/5162/79646/11182…	170
501Mel	GO:0010506	regulation of autophagy	116/4741	317/18723	4.88779e-06	0.000201429	0.000168636	58476/26353/10133/823/65018/55187/22933/58528/80772/291/4137/55128/7957/155066/11178/8925/23677/79443/9517/64121/58533/90678/23274/340371/80317/23376/5476/55763/9114/5566/56834/535/523/9682/10013/826/10325/51100/9528/120892/2932/4534/8678/54832/7157/51382/114881/55847/5305/25/79837/3064/4233/207063/1982/60412/2801/23265/2072/25827/53373/292/5296/2475/3162/219931/6721/9681/8992/29978/10533/26073/2…	116
501Mel	GO:0071453	cellular response to oxygen levels	72/4741	177/18723	4.97504e-06	0.000203684	0.000170524	2034/2021/65018/10891/537/4000/22933/64506/8837/112399/10397/23409/84317/10370/9114/9131/5165/10449/4720/523/5581/6548/10273/5728/10869/7157/80315/101/54471/28996/2475/3162/10533/4976/596/26355/55662/26608/4193/23545/29904/3091/2627/6839/10135/132864/83990/890/1788/29923/30001/4824/2308/23576/79723/3776/891/5366/4780/677/1789/5163/6546/27087/1263/3383/7015/4609/6285/1958/56776/6781	72
501Mel	GO:0007004	telomere maintenance via telomerase	35/4741	69/18723	5.05826e-06	0.000205746	0.00017225	79618/8658/26277/23293/5609/54386/10576/55505/54433/6117/8550/7013/65057/3192/92345/10728/80169/3183/5394/167227/3320/10694/5981/9894/472/4751/1499/55651/3178/140609/1736/9212/54984/80119/7015	35
501Mel	GO:0032386	regulation of intracellular transport	122/4741	337/18723	5.16826e-06	0.000208864	0.000174861	11149/3745/22885/2039/65018/487/4131/4924/1410/6844/10079/3717/92840/288/10938/57506/5566/302/125170/2664/30846/51100/999/120892/2932/6342/11261/2619/57214/5058/5770/55823/20/127933/84277/54471/51684/51277/9230/11236/55929/4641/11142/5296/5569/6830/3728/5663/8724/9270/6721/81555/7905/26119/4947/23011/1020/10075/29934/9638/392/1778/51569/55072/4193/54741/3638/5116/88/79752/1660/9024/9648/54888/590…	122
501Mel	GO:0032200	telomere organization	66/4741	159/18723	5.43527e-06	0.000218247	0.000182716	10039/79618/8658/7011/2072/26277/23293/5609/54386/5371/5514/10576/55505/5889/23137/54433/79035/6117/2547/64858/8550/7013/65057/3192/7515/55183/92345/2237/10728/80169/3183/7486/675/84444/9937/5394/167227/3320/10694/5981/9894/898/472/3184/4751/3181/1499/55651/1763/6119/51002/3178/140609/1736/5111/9156/9212/26354/7517/5888/9401/54984/641/80119/7015/4609	66
501Mel	GO:0048284	organelle fusion	60/4741	141/18723	5.61345e-06	0.000223966	0.000187504	6616/57586/10815/5864/10493/6812/79594/6844/858/578/57617/51479/80208/23339/302/10939/9927/11261/6845/5305/55823/80124/8615/9842/9342/23208/9341/27072/81555/9527/6811/4976/54809/57143/84286/10075/54927/23673/8417/55647/7879/143187/8773/5872/8676/6843/6804/55014/23400/983/2054/10228/581/85409/201164/8411/84079/29091/9882/54734	60
501Mel	GO:0051784	negative regulation of nuclear division	30/4741	56/18723	5.70798e-06	0.000226296	0.000189455	146691/324/10201/25906/56984/10403/55795/55055/699/472/11130/5573/54908/5347/1111/7175/9319/1063/7272/55755/81620/891/26271/27085/701/1843/4085/9212/9735/7517	30
501Mel	GO:0006310	DNA recombination	112/4741	305/18723	5.86985e-06	0.00023125	0.000193602	11105/7292/2021/10039/55317/93973/79840/7011/23304/9907/375757/79725/2072/64859/6830/2074/55218/4437/56941/54386/5423/9400/5889/23137/79035/6117/2521/2547/80010/64210/672/54780/5980/9984/79728/83695/22909/119392/84083/7515/51377/7040/3838/55183/8607/2237/51176/29893/7486/675/83990/23347/8317/7518/55010/6929/84515/84296/4173/254394/472/6421/253714/5932/10721/165918/2187/10635/63979/1111/126549/891…	112
501Mel	GO:0022406	membrane docking	41/4741	86/18723	6.12155e-06	0.000239659	0.000200642	6616/11149/3745/5865/10768/5864/115827/6812/4905/858/57617/54843/10497/9751/11261/23241/55823/9409/60412/8615/9342/9341/10890/8724/6811/22863/23673/8417/7879/5872/8676/6804/55014/10244/2054/10228/51134/1488/4478/80184/3383	41
501Mel	GO:0009150	purine ribonucleotide metabolic process	131/4741	368/18723	6.33533e-06	0.000246488	0.000206359	80201/8034/3479/5138/10861/80221/4967/9605/79873/55753/25874/55902/65018/221264/10891/203/128486/5313/957/5160/5213/8604/5164/5236/254552/283927/79993/3098/1738/570/108/2821/23417/32/10005/5465/5165/3155/5208/38/1737/215/523/260425/9414/8803/53354/120892/54677/79877/226/1743/79717/137964/5214/84277/5167/54995/10201/50808/5162/79646/11182/51000/5663/3295/112/5571/4976/131870/84836/204/4354/9200/40…	131
501Mel	GO:0007099	centriole replication	24/4741	41/18723	6.43068e-06	0.000248653	0.000208172	9525/27243/9738/153241/284403/672/7840/9851/6491/22995/79959/282809/284001/85459/152185/9662/4869/163786/55755/10733/2648/55835/55722/8850	24
501Mel	GO:0050770	regulation of axonogenesis	64/4741	154/18723	7.14873e-06	0.000274722	0.000229997	6696/6792/4747/65078/6092/23105/10512/5362/4131/1954/4137/57556/11344/57698/10090/2664/2932/5728/80031/5058/66008/26037/3984/1982/659/10154/5663/10509/5364/5048/1020/9798/8766/57609/10505/2043/6498/51199/5365/9024/10371/23499/6259/1949/6091/9353/23654/223117/10501/2803/1123/8851/9423/10507/26230/6405/23566/2258/2045/4038/54910/5454/56920/4133	64
501Mel	GO:0007098	centrosome cycle	56/4741	130/18723	7.29518e-06	0.00027864	0.000233277	22809/9371/2801/9525/402/84552/27243/11190/10403/9738/153241/284403/51199/672/7840/54930/9851/6491/22995/79959/91147/983/282809/117178/1070/26973/284001/675/85459/152185/22994/9662/3832/5347/4869/1111/4751/1499/163786/115106/55755/4957/54801/899/10733/2648/93323/7517/5902/55559/55835/55722/84612/7516/8850/9696	56
501Mel	GO:0071900	regulation of protein serine/threonine kinase activity	128/4741	359/18723	7.35361e-06	0.00027917	0.00023372	348/6609/27013/2185/26524/4296/7189/5607/9500/2950/9479/7786/120892/324/5728/10114/57214/5058/5770/101/808/25/3064/22924/28951/81617/2260/659/11142/5569/5663/493/23328/10983/1849/5571/5576/7026/7016/11329/5609/7251/1027/1857/5575/79616/1031/10454/54465/8754/10221/10979/6188/6789/11140/54619/2043/10527/9088/84062/902/7855/23560/80279/7040/1022/57018/26973/6091/5310/56647/153090/56034/890/5580/9894…	128
501Mel	GO:0006270	DNA replication initiation	21/4741	34/18723	7.54376e-06	0.000284663	0.00023832	5001/57418/4999/23594/11073/64785/23649/898/4173/4172/5422/4174/4175/81620/4171/990/4998/4176/90381/55388/8318	21
501Mel	GO:0010833	telomere maintenance via telomere lengthening	39/4741	81/18723	7.60348e-06	0.000285199	0.000238768	79618/8658/2072/26277/23293/5609/54386/10576/55505/54433/6117/64858/8550/7013/65057/3192/92345/10728/80169/3183/5394/167227/3320/10694/5981/9894/472/4751/3181/1499/55651/3178/140609/1736/9212/5888/54984/80119/7015	39
501Mel	GO:1904029	regulation of cyclin-dependent protein kinase activity	45/4741	98/18723	7.69111e-06	0.000286768	0.000240082	27013/26524/324/5728/22924/10983/7026/1027/79616/1031/11140/54619/10527/9088/902/23560/80279/1022/57018/5310/56647/890/898/1030/1033/5347/9133/1163/891/3843/990/899/51191/995/8851/993/84722/7023/3087/1029/641/1164/8850/595/7128	45
501Mel	GO:0061387	regulation of extent of cell growth	49/4741	110/18723	8.80701e-06	0.000326433	0.000273289	348/6696/6792/65078/23105/10512/4131/1954/4137/10439/57556/11344/57698/2664/2932/80031/5058/3984/25/1982/659/10509/5048/23011/1020/9798/8766/57609/150465/10505/10371/23499/6259/25942/223117/10501/1808/4825/2803/8851/9423/10507/6405/23566/2258/2045/54910/56920/4133	49
501Mel	GO:0044242	cellular lipid catabolic process	83/4741	214/18723	8.98871e-06	0.000331207	0.000277286	1384/35/1666/6609/2110/80724/57704/23175/3032/22933/1962/30/56898/254552/283927/5264/2760/34/23417/57406/50640/32/8228/10005/5465/375775/10449/38/10994/215/64900/2108/10825/51099/1376/8310/51573/6342/1892/54677/1374/549/3030/6610/284161/5095/3073/1891/23659/196463/51/10999/219743/7920/83752/2475/3295/1632/747/5828/3033/55331/57104/8660/390916/222236/11313/3712/5096/341/171586/10478/3949/55627/260…	83
501Mel	GO:0006086	acetyl-CoA biosynthetic process from pyruvate	10/4741	11/18723	9.11676e-06	0.000332392	0.000278278	25874/5160/5164/1738/5165/1737/5162/8050/5163/5166	10
501Mel	GO:0090307	mitotic spindle assembly	33/4741	65/18723	9.12698e-06	0.000332392	0.000278278	9371/2801/9525/26073/8766/27243/29127/49856/90990/10735/3796/3192/9055/8243/126731/3833/991/56647/729440/152185/440145/22974/10464/3832/5347/9126/4751/7175/56992/4605/9212/11200/9493	33
501Mel	GO:0033865	nucleoside bisphosphate metabolic process	55/4741	128/18723	9.59006e-06	0.000343269	0.000287384	8034/10861/80221/4967/25874/55902/128486/5160/5164/254552/283927/79993/1738/570/23417/32/10005/5165/3155/38/1737/215/8803/53354/54677/79877/1743/79717/137964/5167/54995/5162/79646/51000/3295/84836/9200/8050/390916/3157/2194/60481/8459/11332/51166/1836/2181/2180/9060/5163/134526/54898/5166/51703/6999	55
501Mel	GO:0033875	ribonucleoside bisphosphate metabolic process	55/4741	128/18723	9.59006e-06	0.000343269	0.000287384	8034/10861/80221/4967/25874/55902/128486/5160/5164/254552/283927/79993/1738/570/23417/32/10005/5165/3155/38/1737/215/8803/53354/54677/79877/1743/79717/137964/5167/54995/5162/79646/51000/3295/84836/9200/8050/390916/3157/2194/60481/8459/11332/51166/1836/2181/2180/9060/5163/134526/54898/5166/51703/6999	55
501Mel	GO:0034032	purine nucleoside bisphosphate metabolic process	55/4741	128/18723	9.59006e-06	0.000343269	0.000287384	8034/10861/80221/4967/25874/55902/128486/5160/5164/254552/283927/79993/1738/570/23417/32/10005/5165/3155/38/1737/215/8803/53354/54677/79877/1743/79717/137964/5167/54995/5162/79646/51000/3295/84836/9200/8050/390916/3157/2194/60481/8459/11332/51166/1836/2181/2180/9060/5163/134526/54898/5166/51703/6999	55
501Mel	GO:0009117	nucleotide metabolic process	166/4741	489/18723	9.99639e-06	0.000355781	0.000297859	80201/8034/3479/23057/5138/10861/80221/4967/9605/79873/55753/25874/64802/55902/65018/221264/10891/203/128486/5313/957/5160/56953/5213/8604/5164/5236/254552/283927/79993/3098/1738/570/108/27231/7084/2821/23417/32/10005/5465/5165/3155/5208/1267/38/1737/215/523/260425/9414/161823/8803/53354/120892/54677/79877/23475/226/1743/79717/137964/5214/84277/5167/54995/55312/10201/50808/5162/79646/11182/51000/…	166
501Mel	GO:0046700	heterocycle catabolic process	153/4741	445/18723	1.01883e-05	0.000360561	0.000301861	9104/5138/6041/79873/85441/64802/2021/128486/4329/3176/957/56953/57060/254552/283927/10140/23417/23053/253943/9131/10179/65080/1267/22882/38/215/22849/400410/645/161823/7431/9811/23475/79675/10922/58511/5578/54790/9641/5167/3163/1244/6050/23293/79048/2475/3162/1774/129563/27044/131870/192670/200035/2592/390916/201626/29102/9704/5150/10921/87178/191/2521/26986/2935/10236/1773/1660/54888/5433/10591…	153
501Mel	GO:1904666	regulation of ubiquitin protein ligase activity	16/4741	23/18723	1.03521e-05	0.000364303	0.000304994	5728/8945/6209/6224/991/6135/6201/11065/6125/6167/5347/9349/9532/27338/26271/4085	16
501Mel	GO:0030071	regulation of mitotic metaphase/anaphase transition	31/4741	60/18723	1.06916e-05	0.000367979	0.000308071	324/25906/56984/10403/10783/55795/55055/9700/699/472/11065/11130/54908/9787/5347/7175/9319/1063/7272/55755/81620/891/990/26271/701/1843/4085/9212/9735/7517/1062	31
501Mel	GO:0033866	nucleoside bisphosphate biosynthetic process	31/4741	60/18723	1.06916e-05	0.000367979	0.000308071	8034/10861/25874/55902/5160/5164/79993/1738/23417/32/5165/38/1737/53354/79877/79717/5162/79646/51000/9200/8050/60481/11332/1836/2181/2180/9060/5163/54898/5166/51703	31
501Mel	GO:0034030	ribonucleoside bisphosphate biosynthetic process	31/4741	60/18723	1.06916e-05	0.000367979	0.000308071	8034/10861/25874/55902/5160/5164/79993/1738/23417/32/5165/38/1737/53354/79877/79717/5162/79646/51000/9200/8050/60481/11332/1836/2181/2180/9060/5163/54898/5166/51703	31
501Mel	GO:0034033	purine nucleoside bisphosphate biosynthetic process	31/4741	60/18723	1.06916e-05	0.000367979	0.000308071	8034/10861/25874/55902/5160/5164/79993/1738/23417/32/5165/38/1737/53354/79877/79717/5162/79646/51000/9200/8050/60481/11332/1836/2181/2180/9060/5163/54898/5166/51703	31
501Mel	GO:1902099	regulation of metaphase/anaphase transition of cell cycle	32/4741	63/18723	1.22658e-05	0.000419852	0.000351499	324/55743/25906/56984/10403/10783/55795/55055/9700/699/472/11065/11130/54908/9787/5347/7175/9319/1063/7272/55755/81620/891/990/26271/701/1843/4085/9212/9735/7517/1062	32
501Mel	GO:0031110	regulation of microtubule polymerization or depolymerization	41/4741	88/18723	1.24169e-05	0.000422716	0.000353897	10634/122060/57704/4131/4137/89795/10382/8874/10013/324/5058/25/22924/4233/6249/23271/146057/24139/402/1027/57606/2288/6188/3925/51199/79929/10982/9181/10300/4130/403/22974/10142/55755/221150/348235/8851/84722/50861/2258/4133	41
501Mel	GO:0019439	aromatic compound catabolic process	159/4741	467/18723	1.2717e-05	0.000430591	0.00036049	1734/9104/2052/5138/6041/79873/85441/64802/2021/128486/2053/3176/957/56953/57060/30/254552/283927/10140/23417/23053/253943/9131/10179/65080/1267/22882/38/215/22849/400410/645/161823/2954/7431/9811/79675/10922/58511/5578/54790/9641/5167/3163/1244/6050/23293/26002/79048/2475/3162/1774/129563/27044/131870/192670/200035/2592/390916/201626/29102/9704/5150/10921/87178/191/2521/26986/2935/2184/10236/177…	159
501Mel	GO:2001020	regulation of response to DNA damage stimulus	84/4741	219/18723	1.30461e-05	0.000439358	0.00036783	4137/10039/754/84309/842/7157/22954/25/78990/10116/2072/2074/79624/598/596/23201/57332/54386/25946/5371/5514/9400/4170/4193/3622/54465/6188/2521/6498/64210/1660/672/54780/9984/7515/55183/151636/51720/84250/23347/79621/55010/5580/472/79968/200734/10721/165918/637/2187/10635/63979/8444/4869/1111/126549/8914/4824/92797/6154/22976/7398/5366/83666/7913/55159/26271/5111/116028/161742/3146/5888/11200/22…	84
501Mel	GO:0031346	positive regulation of cell projection organization	125/4741	353/18723	1.36076e-05	0.000455817	0.000381609	5274/348/64787/5526/6792/4747/6092/23373/1272/5362/2185/4131/1954/4137/23242/8837/2889/2042/3675/23363/10938/9820/11344/5176/57698/10096/23580/2896/8874/2664/411/9139/22871/324/54664/5058/5898/57175/3984/3064/10458/1982/84299/9842/659/26039/57498/2475/10154/9896/160/8724/81545/5364/1523/5048/4976/23011/9798/9638/8766/54700/1857/2059/49856/5584/7436/9738/153241/51188/2043/6498/29904/51199/5365/817…	125
501Mel	GO:0006268	DNA unwinding involved in DNA replication	12/4741	15/18723	1.41258e-05	0.00046817	0.000391951	9400/6117/6742/7486/4173/4175/4171/4176/5888/3159/9401/641	12
501Mel	GO:0051315	attachment of mitotic spindle microtubules to kinetochore	12/4741	15/18723	1.41258e-05	0.00046817	0.000391951	8678/51115/283489/10403/3192/1060/81929/11004/83540/81620/9212/1062	12
501Mel	GO:0072659	protein localization to plasma membrane	104/4741	284/18723	1.42233e-05	0.000468921	0.00039258	30818/23555/9053/3745/5865/3911/5864/6769/10133/115827/57512/6812/4905/4644/6844/23167/481/582/288/2042/3675/10938/1173/5170/302/30844/10966/55625/51125/129303/91663/5581/30846/6281/9528/999/245812/8548/64689/23241/391/90196/1213/65267/254887/25921/287/9581/9341/10890/3728/5911/493/9270/285172/26119/598/1020/8500/353116/55667/8766/57154/27032/55737/25831/26262/22841/8417/145567/7879/5872/23513/55…	104
501Mel	GO:0044380	protein localization to cytoskeleton	30/4741	58/18723	1.4365e-05	0.000471112	0.000394414	10634/2932/324/22924/1453/10540/146057/636/283489/23386/49856/11190/1729/9857/3192/10982/9851/6491/4130/51134/10615/10464/22994/29887/58489/7272/81610/64770/55722/9585	30
501Mel	GO:0044270	cellular nitrogen compound catabolic process	154/4741	451/18723	1.4514e-05	0.00047352	0.00039643	9104/5138/6041/79873/85441/64802/2021/128486/4329/3176/957/56953/57060/254552/283927/10140/23417/23053/253943/9131/10179/65080/1267/22882/38/215/22849/400410/645/161823/7431/5447/9811/7263/23475/79675/10922/58511/5578/54790/9641/5167/3163/1244/6050/23293/79048/2475/3162/1774/129563/27044/131870/192670/200035/4817/2592/390916/201626/29102/9704/5150/10921/87178/191/2521/26986/2935/10236/1773/1660/5…	154
501Mel	GO:0000470	maturation of LSU-rRNA	18/4741	28/18723	1.54379e-05	0.000501051	0.000419479	51018/4809/4839/84549/9326/80135/6130/23560/4736/84365/79707/26156/8886/11224/6129/81887/23246/55651	18
501Mel	GO:0006913	nucleocytoplasmic transport	109/4741	301/18723	1.57855e-05	0.000507078	0.000424525	144165/10768/9670/4000/9679/3717/9883/57506/5566/754/80824/999/120892/2932/6310/11261/7157/127933/4435/51684/51277/1408/55929/23293/11142/5296/5569/6830/3728/6815/5663/129138/5571/1020/57154/100101267/5371/5514/51569/4193/1871/51319/23165/10527/6059/1660/54888/5433/9984/6209/5901/10204/23279/10762/6428/7040/3838/51496/5530/1894/84324/983/7341/10212/3621/55795/5310/868/51194/84946/55153/9631/5580/…	109
501Mel	GO:0051169	nuclear transport	109/4741	301/18723	1.57855e-05	0.000507078	0.000424525	144165/10768/9670/4000/9679/3717/9883/57506/5566/754/80824/999/120892/2932/6310/11261/7157/127933/4435/51684/51277/1408/55929/23293/11142/5296/5569/6830/3728/6815/5663/129138/5571/1020/57154/100101267/5371/5514/51569/4193/1871/51319/23165/10527/6059/1660/54888/5433/9984/6209/5901/10204/23279/10762/6428/7040/3838/51496/5530/1894/84324/983/7341/10212/3621/55795/5310/868/51194/84946/55153/9631/5580/…	109
501Mel	GO:0098876	vesicle-mediated transport to the plasma membrane	57/4741	136/18723	1.63944e-05	0.000521292	0.000436425	6616/11149/10815/10133/2060/23233/4905/6844/10079/582/288/10938/55763/23339/30844/51125/30846/84162/8548/10564/90196/60412/163486/9230/28952/55275/9581/10123/9341/10890/8724/149371/29934/8766/392/27032/55737/54520/11021/7879/5872/23513/88/23499/9495/10228/64284/403/26088/114879/84079/29091/2803/30845/2181/11031/22876	57
501Mel	GO:1900180	regulation of protein localization to nucleus	57/4741	136/18723	1.63944e-05	0.000521292	0.000436425	4000/56957/26524/3717/9201/2752/57506/9500/166614/999/2932/11261/51684/55929/11142/5296/5569/3728/5663/3985/7016/4771/25885/51569/10413/10576/1495/10979/9258/51574/4931/5901/10204/80279/23400/7040/151636/1894/983/2534/7341/25942/10694/5580/23607/5347/4869/53371/7175/3843/83666/1736/7545/9221/347/54984/7015	57
501Mel	GO:0051028	mRNA transport	55/4741	130/18723	1.6546e-05	0.000523456	0.000438237	9961/9883/8658/23299/56648/23293/4641/6830/3800/100101267/23165/1660/54888/5433/9984/6426/10204/23279/10762/6428/79023/84324/23225/1070/220988/10212/55795/10644/9631/57187/81929/10642/7884/79902/55110/64901/53371/7175/84321/25909/3181/57122/26019/4116/6432/9908/10189/4927/3178/55706/65109/129401/677/7538/3087	55
501Mel	GO:1905818	regulation of chromosome separation	35/4741	72/18723	1.68886e-05	0.00053161	0.000445063	324/55743/25906/56984/10403/64682/10783/55795/55055/9700/699/472/11065/10460/11130/54908/9787/5347/7175/9319/1063/7272/55755/81620/891/990/26271/701/1843/4085/9212/9735/7517/9232/1062	35
501Mel	GO:0016197	endosomal transport	87/4741	230/18723	1.72162e-05	0.000539211	0.000451427	11149/83547/2060/10043/10079/58533/23274/51272/9185/91056/10938/9201/55317/51479/23339/30844/9827/55111/55745/25938/30846/84162/120892/54497/9907/9765/8729/9779/163486/9230/1213/28952/55275/6272/9581/10123/9341/10890/22836/8724/757/5870/9527/9525/6811/23023/51160/79735/29934/55004/1203/8766/392/23085/55737/112936/8027/9043/54520/11021/27243/7879/143187/257364/54741/5872/23513/84661/88/51560/85021…	87
501Mel	GO:0043543	protein acylation	91/4741	243/18723	1.76533e-05	0.000550151	0.000460585	4967/55733/3662/10891/4137/26009/9027/27154/8648/1738/26038/254359/2752/406/55625/51125/51105/2932/5447/1743/55683/29800/23326/93624/122830/254887/9397/8861/25921/55929/8986/57326/51230/10626/9913/7917/55146/340481/6659/54556/57609/54386/9862/79903/56848/80314/51114/23741/6883/23137/29117/151507/80018/55167/55257/672/6871/79929/9425/6418/11091/8607/51176/9767/253832/84140/3066/675/25942/4297/8545…	91
501Mel	GO:0034502	protein localization to chromosome	42/4741	92/18723	1.8191e-05	0.000564101	0.000472264	10039/8658/1200/80124/51112/26277/283489/54386/10576/10403/23137/79035/6117/55920/7013/65057/983/675/84250/55055/7518/113130/10694/157570/84515/254394/54908/5347/55011/7272/2146/81620/55166/27085/1058/1736/701/9212/9735/26354/54984/7015	42
501Mel	GO:0006278	RNA-dependent DNA biosynthetic process	36/4741	75/18723	1.83305e-05	0.000565628	0.000473543	79618/8658/7011/26277/23293/5609/54386/10576/55505/54433/6117/8550/7013/65057/3192/92345/10728/80169/3183/5394/167227/3320/10694/5981/9894/472/4751/1499/55651/3178/140609/1736/9212/54984/80119/7015	36
501Mel	GO:0046685	response to arsenic-containing substance	20/4741	33/18723	1.86521e-05	0.000572729	0.000479488	4747/7390/119391/5176/2235/10105/5728/6047/1244/3162/210/2729/9446/1616/79752/51593/132864/467/3178/1543	20
501Mel	GO:0030516	regulation of axon extension	43/4741	95/18723	1.88773e-05	0.0005752	0.000481557	348/6792/65078/10512/4131/1954/4137/10439/57556/11344/57698/2664/2932/80031/5058/3984/25/1982/659/10509/5048/23011/1020/8766/57609/150465/10505/10371/23499/6259/25942/223117/10501/1808/4825/2803/8851/9423/10507/6405/54910/56920/4133	43
501Mel	GO:1902115	regulation of organelle assembly	73/4741	186/18723	1.89162e-05	0.0005752	0.000481557	6792/115704/65018/79874/6385/90678/51100/120892/4534/8678/6047/5305/55823/79837/3064/51112/5601/29978/9525/3985/81876/7016/78999/9638/1540/1778/22930/7251/8027/27243/10413/49856/55254/9738/153241/672/7840/3192/345643/255967/6491/80199/79959/126731/85459/152185/10615/203228/869/6386/9662/5347/4869/7175/8558/56992/55755/9908/10733/4478/2648/10146/57622/3556/26471/170690/55835/6624/55329/8850/9696/5…	73
501Mel	GO:0001933	negative regulation of protein phosphorylation	121/4741	342/18723	1.93996e-05	0.000587048	0.000491475	9961/348/9104/23530/2039/6609/10891/1845/22933/140885/84327/26524/64780/58533/578/5170/2950/91663/9479/80851/120892/324/5728/11261/10114/56940/5770/808/25/5167/28951/11142/2475/5569/5528/5663/9270/5518/25998/1849/5576/94032/5339/3315/7026/7016/22863/11329/4771/7251/1027/5575/54386/1031/9043/103/135228/10221/84959/10527/5783/58190/154043/55872/84062/5621/104/80279/7040/26973/23603/9467/868/9353/15…	121
501Mel	GO:0072521	purine-containing compound metabolic process	143/4741	416/18723	1.97858e-05	0.000595857	0.000498851	80201/8034/3479/5138/10861/80221/4967/9605/79873/55753/25874/55902/65018/221264/10891/203/128486/5313/957/5160/5213/8604/5164/5236/254552/283927/79993/3098/1738/140733/570/108/2821/23417/32/10005/5465/5165/3155/5208/38/1737/215/523/260425/9414/161823/8803/53354/120892/54677/79877/226/1743/79717/137964/5214/84277/5167/54995/10201/50808/5162/79646/11182/51000/5663/3295/112/5571/4976/131870/84836/20…	143
501Mel	GO:0005996	monosaccharide metabolic process	95/4741	257/18723	2.13658e-05	0.00064036	0.000536108	80201/9104/2548/3479/150094/114897/5091/10891/23324/5160/5213/8604/9563/89801/5164/5236/390637/119391/3098/34/5509/79660/2821/23417/32/6652/5465/5165/5208/1737/4125/2932/283209/1374/7157/226/60343/130589/23038/5214/5167/10499/283450/2475/5162/5373/4124/5372/2584/7355/2729/2592/8660/9446/145173/83440/80146/22934/231/3795/11091/221927/25948/23178/9942/3175/10327/10447/9962/11164/1196/132158/467/556…	95
501Mel	GO:1901361	organic cyclic compound catabolic process	166/4741	495/18723	2.14963e-05	0.000641204	0.000536815	1588/348/1734/9104/6696/5138/6041/79873/85441/64802/2021/128486/51171/4329/2053/3176/957/56953/1593/57060/30/254552/283927/10140/23417/23053/253943/9131/10179/65080/1267/22882/38/215/22849/400410/645/161823/2954/7431/9811/412/23475/79675/10922/58511/5578/54790/9641/5167/3163/1244/6050/23293/26002/79048/2475/3162/1774/129563/27044/131870/192670/200035/2592/390916/201626/29102/9704/5150/10921/87178…	166
501Mel	GO:0048278	vesicle docking	30/4741	59/18723	2.21764e-05	0.000658356	0.000551175	6616/11149/3745/5865/5864/115827/6812/4905/858/57617/54843/10497/9751/55823/60412/8615/9341/10890/6811/23673/8417/5872/8676/6804/55014/10244/2054/10228/51134/1488	30
501Mel	GO:0008380	RNA splicing	148/4741	434/18723	2.27955e-05	0.000673542	0.000563888	113146/54845/10891/57060/64121/10179/60677/10922/83989/83707/6830/7375/10150/79650/5518/22927/10659/23020/25980/55225/3191/8487/4857/4809/4236/9541/285672/6231/10946/10283/51319/25929/84991/55280/10921/9129/8161/2521/26986/55692/51691/51574/10236/1660/9410/6625/9991/1207/8175/9984/1195/6426/3192/55596/27339/23398/6629/143884/55660/84844/11129/10772/26121/58155/6428/6434/9904/10419/27316/8233/4670…	148
501Mel	GO:0034655	nucleobase-containing compound catabolic process	140/4741	407/18723	2.31687e-05	0.000681355	0.000570429	9104/5138/6041/79873/85441/64802/2021/128486/957/56953/57060/254552/283927/10140/23417/23053/253943/9131/10179/65080/1267/22882/38/215/22849/400410/161823/7431/9811/79675/10922/58511/5578/9641/5167/6050/23293/79048/2475/1774/129563/27044/131870/192670/200035/2592/390916/201626/29102/9704/5150/10921/87178/191/2521/26986/2935/10236/1773/1660/54888/5433/10591/30833/81892/3192/55596/255967/9567/92345…	140
501Mel	GO:0007035	vacuolar acidification	16/4741	24/18723	2.37325e-05	0.000694675	0.000581581	1657/23312/155066/50617/84317/9114/2896/535/25932/54664/8992/51606/1203/54982/23545/10312	16
501Mel	GO:0021537	telencephalon development	92/4741	248/18723	2.43876e-05	0.000709804	0.000594247	63827/6331/4967/4747/65078/6092/10579/5915/266727/3398/83696/221692/8648/23657/22809/6867/27089/79633/166614/120892/2932/5728/9289/79048/5663/493/5048/1020/9638/8195/4771/5455/6497/10718/81853/146760/153241/284403/23353/51199/10371/3091/1021/7515/51377/6434/200894/55236/6259/51176/25987/85458/6091/259266/23322/85358/84678/9353/153090/55636/2044/10460/581/4830/471/22903/10642/1499/3975/2146/9928/1…	92
501Mel	GO:0090329	regulation of DNA-dependent DNA replication	25/4741	46/18723	2.45333e-05	0.000709804	0.000594247	10533/57418/11232/84083/5982/6742/144455/675/8317/5985/80174/79075/51053/8914/5983/81620/26271/10926/5111/54962/79733/5984/90381/63922/641	25
501Mel	GO:0042274	ribosomal small subunit biogenesis	35/4741	73/18723	2.45893e-05	0.000709804	0.000594247	8780/4809/25879/6194/10607/79954/153443/64745/6209/6838/28987/55720/64434/6227/6169/83732/27340/10436/84946/6201/6218/25983/51065/65095/6230/6223/3921/4869/27341/6229/10171/92797/6232/11157/91695	35
501Mel	GO:0006637	acyl-CoA metabolic process	43/4741	96/18723	2.58785e-05	0.000739652	0.000619235	80221/4967/25874/55902/128486/5160/5164/254552/283927/79993/1738/570/23417/32/10005/5165/3155/38/1737/215/8803/1743/79717/137964/54995/5162/3295/9200/8050/390916/3157/2194/60481/11332/51166/2181/2180/5163/134526/54898/5166/51703/6999	43
501Mel	GO:0035383	thioester metabolic process	43/4741	96/18723	2.58785e-05	0.000739652	0.000619235	80221/4967/25874/55902/128486/5160/5164/254552/283927/79993/1738/570/23417/32/10005/5165/3155/38/1737/215/8803/1743/79717/137964/54995/5162/3295/9200/8050/390916/3157/2194/60481/11332/51166/2181/2180/5163/134526/54898/5166/51703/6999	43
501Mel	GO:0007409	axonogenesis	143/4741	418/18723	2.59776e-05	0.000739652	0.000619235	348/6696/6792/1141/4747/65078/3911/6092/23105/5864/10512/3913/6812/5362/4131/1954/7414/4137/23077/23242/10439/288/2042/57556/25806/9201/11344/57698/80208/10090/1267/2664/10939/4692/10013/2932/5728/80031/5058/66008/26037/3984/25/10458/391/1982/659/4684/10154/3800/10890/5663/10509/5364/5048/23011/1020/9798/596/23767/9638/8766/2297/57609/9344/1605/85440/11313/150465/10505/2043/3925/6498/51199/5365/9…	143
501Mel	GO:0009123	nucleoside monophosphate metabolic process	36/4741	76/18723	2.63914e-05	0.000748036	0.000626254	221264/203/56953/7084/260425/9414/55312/50808/83549/139596/204/4354/158/1716/10591/30833/1723/7298/1841/7083/8833/102157402/5634/471/353/1854/5471/100/5198/7378/10606/5631/7371/4860/3251/136332	36
501Mel	GO:0001841	neural tube formation	45/4741	102/18723	2.71024e-05	0.000764726	0.000640227	7042/144165/23242/6385/4524/10370/5566/7189/5898/7798/5567/25/8915/51684/7289/4976/57534/6659/25831/1857/26160/6497/23513/55764/6789/55081/7408/3091/11146/7040/6491/80199/25902/10395/84678/6201/5216/23654/5754/2535/2648/5727/9585/27443/54910	45
501Mel	GO:0070997	neuron death	126/4741	361/18723	2.72991e-05	0.000766824	0.000641984	7042/348/3745/6620/4747/7020/64802/4835/2021/65018/10891/6648/6812/23621/2185/4137/2632/84280/3717/58533/112399/340371/4296/23657/2821/5176/9131/5170/5465/2896/1139/163/6548/10570/10457/120892/2932/11261/842/23368/7157/80315/101/4208/25/4435/80331/23321/8772/28996/7466/2475/3162/5663/7965/10533/824/598/1020/596/353116/26355/55737/2729/135112/5423/4170/29110/5584/54434/1616/10280/10038/57465/3091/…	126
501Mel	GO:0045017	glycerolipid biosynthetic process	93/4741	252/18723	2.78985e-05	0.000780161	0.000653149	80235/9104/150094/9306/8503/128486/23175/5833/56894/23167/9468/5298/5130/55650/255919/63874/55224/3628/129303/54344/64900/51099/5728/4534/10555/8835/9807/137964/7376/9600/5305/4952/79837/23659/9926/22908/93210/8395/79575/56895/26751/5296/9896/8760/285172/824/51447/84720/23396/93183/5297/57104/65258/145567/55697/22979/51205/171586/55500/5338/5283/8867/3949/254531/160851/3613/375133/55294/253558/57…	93
501Mel	GO:0042326	negative regulation of phosphorylation	133/4741	385/18723	2.91135e-05	0.000810519	0.000678565	9961/348/9104/23530/2039/6609/10891/113791/1845/22933/4137/140885/84327/26524/64780/58533/578/5170/5465/2950/91663/9479/80851/120892/324/5728/11261/10114/56940/5770/808/5305/25/79837/5167/28951/11142/2475/5569/5528/5663/9270/5518/25998/1849/5576/94032/5339/3315/7026/7016/22863/11329/4771/7251/1027/8660/5575/65125/54386/1031/9043/103/135228/10221/84959/10527/5783/58190/154043/55872/84062/3192/5621…	133
501Mel	GO:0022411	cellular component disassembly	150/4741	443/18723	3.03983e-05	0.00084055	0.000703707	51332/344148/119/23130/2039/64802/10133/10904/2021/65018/10891/1845/55187/23175/4131/291/4905/118/2113/79594/89795/11337/79443/64780/6712/23274/29767/23376/11344/9131/6604/23710/400410/10013/8775/9922/51368/9927/25851/2932/324/8678/54832/7157/11078/57192/101/56648/58511/5578/3064/8729/84340/2801/9342/3920/292/81631/5579/6709/57701/55102/6721/11345/23271/9525/57326/10533/6811/256471/146057/5048/10…	150
501Mel	GO:0032922	circadian regulation of gene expression	33/4741	68/18723	3.04605e-05	0.00084055	0.000703707	148523/10891/23077/79365/3398/406/5465/9500/10499/1408/8863/1453/9572/5927/10075/5371/9112/3192/10419/10135/3066/7150/4297/10514/463/8864/3399/25819/8553/196/3400/3397/1958	33
501Mel	GO:0045862	positive regulation of proteolysis	129/4741	372/18723	3.11553e-05	0.000855951	0.000716601	9447/144165/348/9104/4155/65018/10444/9604/22933/2185/4137/1509/79594/8837/255488/11337/3717/112399/578/54467/9131/22900/2896/3300/400410/10273/120892/2932/5728/842/114881/101/54205/22954/10440/84236/8915/28951/79699/51107/28952/11236/8772/1453/83464/55743/5663/5601/55070/29978/7917/9798/8945/26355/825/57154/91445/25831/2729/5371/51079/55848/51136/257364/54982/4193/317/8754/10221/6188/55081/3428/…	129
501Mel	GO:0006887	exocytosis	123/4741	352/18723	3.18682e-05	0.000871714	0.000729797	5730/6616/203190/57586/3745/9143/10815/8618/5865/9145/2039/5864/6861/115827/537/6812/6855/23233/23621/4905/5873/6385/695/6844/10079/2241/56900/64780/57617/55763/54843/10497/5170/9751/192683/8775/399979/22871/120892/2932/8372/10564/5058/9805/5898/6845/808/55823/10565/80331/60412/5127/9230/23265/9342/5866/10755/11336/9581/23208/9341/10890/5579/3162/5663/219931/27072/9525/84932/23011/1020/80223/164/…	123
501Mel	GO:0001843	neural tube closure	40/4741	88/18723	3.22797e-05	0.000879132	0.000736008	7042/144165/23242/6385/4524/10370/5566/7189/5898/5567/25/8915/51684/7289/4976/25831/1857/26160/6497/23513/55764/55081/7408/11146/7040/6491/80199/25902/10395/84678/6201/5216/23654/5754/2535/2648/5727/9585/27443/54910	40
501Mel	GO:0046474	glycerophospholipid biosynthetic process	80/4741	211/18723	3.34078e-05	0.000905916	0.000758432	80235/9306/8503/23175/5833/56894/23167/9468/5298/5130/55650/63874/55224/3628/129303/54344/51099/5728/4534/10555/8835/9807/137964/9600/5305/4952/79837/22908/93210/8395/79575/56895/26751/5296/9896/8760/285172/824/51447/84720/23396/93183/5297/65258/145567/55697/22979/51205/171586/55500/5338/5283/8867/254531/160851/3613/375133/253558/57605/5293/728233/5277/472/8526/146850/8527/9487/80055/55326/57217/…	80
501Mel	GO:1901214	regulation of neuron death	113/4741	319/18723	3.38361e-05	0.000913574	0.000764843	7042/348/3745/6620/4747/7020/64802/4835/65018/10891/6648/6812/23621/2185/4137/2632/84280/3717/58533/112399/340371/4296/23657/2821/5176/9131/5170/5465/2896/1139/163/10457/120892/2932/11261/842/23368/7157/80315/101/4208/25/4435/80331/23321/28996/7466/2475/3162/5663/7965/10533/824/598/1020/596/353116/55737/2729/135112/4170/29110/5584/54434/1616/10280/10038/3091/6418/5621/23400/7043/2534/2149/8883/55…	113
501Mel	GO:0014020	primary neural tube formation	42/4741	94/18723	3.43612e-05	0.000919823	0.000770075	7042/144165/23242/6385/4524/10370/5566/7189/5898/7798/5567/25/8915/51684/7289/4976/25831/1857/26160/6497/23513/55764/55081/7408/3091/11146/7040/6491/80199/25902/10395/84678/6201/5216/23654/5754/2535/2648/5727/9585/27443/54910	42
501Mel	GO:1990830	cellular response to leukemia inhibitory factor	42/4741	94/18723	3.43612e-05	0.000919823	0.000770075	2494/9227/9145/11156/9945/29088/22904/5214/292/5372/165324/2059/5371/84159/3192/6428/55183/8731/5277/57539/6470/29887/22823/4801/6432/4691/1488/3070/4605/129401/7091/9314/4092/9021/26577/3099/54941/7424/688/3383/10253/81848	42
501Mel	GO:0051098	regulation of binding	126/4741	363/18723	3.64227e-05	0.00097086	0.000812802	348/119/3479/3662/22933/118/3717/5909/79618/5092/8658/6604/5566/5465/302/401152/7189/8874/3300/6281/285381/10273/120892/2932/81857/808/25/22924/4233/2801/2072/28996/64324/2296/6815/3162/5663/9270/53339/22927/57326/26119/26073/146057/1020/64400/1203/51042/6497/8487/6789/84959/3428/114991/2043/3925/1660/4931/84062/5901/65057/9044/23560/9236/7040/151636/5530/51176/7341/3066/5334/5310/84444/868/55294…	126
501Mel	GO:0006906	vesicle fusion	46/4741	106/18723	3.68418e-05	0.000977868	0.00081867	6616/57586/10815/5864/6812/6844/858/51479/80208/23339/302/11261/6845/5305/55823/8615/9842/9342/23208/9341/27072/81555/9527/6811/54809/84286/23673/8417/55647/7879/143187/8773/5872/8676/6843/6804/55014/23400/2054/10228/85409/8411/84079/29091/9882/54734	46
501Mel	GO:0001838	embryonic epithelial tube formation	51/4741	121/18723	3.72537e-05	0.000984629	0.00082433	7042/144165/23242/6385/4524/10370/5566/7189/5898/7798/7849/5567/25/8915/51684/7289/4976/57534/6659/25831/1857/26160/6497/23513/55764/6789/55081/7408/3091/11146/7040/6491/80199/25902/10395/84678/6495/6201/5216/23654/5754/51804/1499/2535/2648/79191/5727/9585/30812/27443/54910	51
501Mel	GO:0010971	positive regulation of G2/M transition of mitotic cell cycle	17/4741	27/18723	3.97197e-05	0.00104439	0.00087436	6604/9525/8766/994/5889/55920/983/25942/8317/80174/51514/891/26271/995/993/7480/595	17
501Mel	GO:0051972	regulation of telomerase activity	25/4741	47/18723	3.98481e-05	0.00104439	0.00087436	10039/79618/8658/7157/23293/5609/10576/8550/4931/7013/65057/92345/10728/3320/3184/4751/3181/1499/140609/1736/9212/9314/54984/80119/4609	25
501Mel	GO:0021915	neural tube development	61/4741	152/18723	4.09726e-05	0.00106938	0.000895287	7042/144165/10512/5362/23242/6385/4524/10370/5566/7189/5898/7798/5567/25/8915/51684/140467/7289/5663/4976/57534/6659/25831/1857/26160/6497/55182/23513/55764/6789/55081/7408/3091/11146/7040/6491/80199/25902/200894/5310/23322/10395/199221/84678/6201/5216/23654/5754/23432/92344/2535/2648/677/5727/9585/27443/54910/2637/1969/3280/51339	61
501Mel	GO:0000727	double-strand break repair via break-induced replication	10/4741	12/18723	4.21591e-05	0.00109126	0.0009136	8317/84296/4173/4172/4174/4175/4171/4176/51659/8318	10
501Mel	GO:1904667	negative regulation of ubiquitin protein ligase activity	10/4741	12/18723	4.21591e-05	0.00109126	0.0009136	6209/6224/6135/6201/6125/6167/9349/9532/26271/4085	10
501Mel	GO:0060606	tube closure	40/4741	89/18723	4.44039e-05	0.00114463	0.000958285	7042/144165/23242/6385/4524/10370/5566/7189/5898/5567/25/8915/51684/7289/4976/25831/1857/26160/6497/23513/55764/55081/7408/11146/7040/6491/80199/25902/10395/84678/6201/5216/23654/5754/2535/2648/5727/9585/27443/54910	40
501Mel	GO:1902969	mitotic DNA replication	11/4741	14/18723	4.4995e-05	0.00115512	0.000967062	675/64785/4173/9837/4172/5422/4175/4171/3978/5888/8318	11
501Mel	GO:1990823	response to leukemia inhibitory factor	42/4741	95/18723	4.66315e-05	0.00119224	0.000998144	2494/9227/9145/11156/9945/29088/22904/5214/292/5372/165324/2059/5371/84159/3192/6428/55183/8731/5277/57539/6470/29887/22823/4801/6432/4691/1488/3070/4605/129401/7091/9314/4092/9021/26577/3099/54941/7424/688/3383/10253/81848	42
501Mel	GO:0033157	regulation of intracellular protein transport	85/4741	229/18723	4.75401e-05	0.00121053	0.00101346	3745/22885/2039/65018/4924/6844/3717/288/57506/5566/125170/2664/51100/999/120892/2932/11261/57214/5058/5770/55823/127933/54471/51684/51277/55929/4641/11142/5296/5569/3728/5663/9270/6721/4947/1020/10075/51569/55072/4193/54741/3638/5116/79752/9024/9648/5901/10204/3998/7855/5621/23400/26229/7040/51496/1894/983/2534/7341/55294/9495/9141/55432/5580/22994/10178/53371/7175/2040/6934/3843/580/7295/7545/9…	85
501Mel	GO:0018210	peptidyl-threonine modification	52/4741	125/18723	4.79695e-05	0.00121513	0.0010173	57452/2039/22933/442117/2591/8658/5566/5170/7786/120892/2932/7048/10114/57214/5578/808/65267/28996/2475/8476/5528/5579/817/1020/596/65125/51701/29110/388228/1195/7040/983/8312/5580/56288/200734/7046/5347/8444/1111/8558/285203/7272/8445/161742/8851/7443/11113/4092/9294/54541/10253	52
501Mel	GO:0150115	cell-substrate junction organization	44/4741	101/18723	4.81084e-05	0.00121513	0.0010173	22998/2039/1845/2185/7414/10391/6385/2042/7094/5170/8874/9922/6548/6281/5728/56940/25/667/7205/8861/9270/26073/10420/5339/596/9344/9748/28956/10979/88/55920/90102/23499/10982/23603/10395/3655/1946/3915/3673/5796/347/87/54828	44
501Mel	GO:0006892	post-Golgi vesicle-mediated transport	45/4741	104/18723	4.85854e-05	0.00122224	0.00102326	10133/2060/23233/4905/4644/6844/582/288/55763/51479/51125/8548/10564/54832/8729/90196/60412/5877/28952/23041/55614/6272/9581/27252/9341/10890/160/164/149371/55062/27032/54520/6102/143187/8773/8906/23499/403/26088/114879/29091/2803/30845/2181/11031	45
501Mel	GO:0007088	regulation of mitotic nuclear division	47/4741	110/18723	4.9064e-05	0.00122445	0.00102511	3479/146691/858/23363/9820/324/23113/10201/25906/56984/10403/9088/10419/55795/55055/9700/699/157313/79866/472/11130/54908/9787/5347/1111/4751/7175/1104/9319/1063/7272/55755/81620/891/26271/51203/27085/995/701/1843/4085/9212/9735/7517/9585/4288/4041	47
501Mel	GO:0090174	organelle membrane fusion	47/4741	110/18723	4.9064e-05	0.00122445	0.00102511	6616/57586/10815/5864/6812/6844/858/51479/80208/23339/302/11261/6845/5305/55823/80124/8615/9842/9342/23208/9341/27072/81555/9527/6811/54809/84286/23673/8417/55647/7879/143187/8773/5872/8676/6843/6804/55014/23400/2054/10228/85409/8411/84079/29091/9882/54734	47
501Mel	GO:0071459	protein localization to chromosome, centromeric region	16/4741	25/18723	5.03973e-05	0.00125273	0.00104879	51112/283489/10403/23137/55920/983/55055/54908/7272/81620/55166/27085/1058/701/9212/9735	16
501Mel	GO:0030900	forebrain development	130/4741	379/18723	5.16124e-05	0.00127787	0.00106983	547/63827/1638/6331/4967/1141/4747/54149/65078/6092/10579/10891/5915/266727/2113/6926/3398/83696/221692/8648/5592/26038/25806/9201/23657/22809/5308/6867/1267/3340/55681/27089/79633/166614/999/120892/2932/5728/9289/2775/79048/5663/493/5048/1020/5453/7026/9638/8195/4771/22930/85440/5455/6497/10718/81853/146760/153241/284403/6240/23353/51199/10371/3091/1021/7515/51377/6491/6434/200894/55236/6259/511…	130
501Mel	GO:0006163	purine nucleotide metabolic process	135/4741	396/18723	5.18827e-05	0.0012795	0.0010712	80201/8034/3479/5138/10861/80221/4967/9605/79873/55753/25874/55902/65018/221264/10891/203/128486/5313/957/5160/5213/8604/5164/5236/254552/283927/79993/3098/1738/570/108/2821/23417/32/10005/5465/5165/3155/5208/38/1737/215/523/260425/9414/8803/53354/120892/54677/79877/226/1743/79717/137964/5214/84277/5167/54995/10201/50808/5162/79646/11182/51000/5663/3295/112/5571/4976/131870/84836/204/4354/9200/40…	135
501Mel	GO:0046854	phosphatidylinositol phosphate biosynthetic process	31/4741	64/18723	5.50077e-05	0.00135125	0.00113126	9306/8503/23167/5298/3628/129303/8835/9807/5305/4952/79837/8395/5296/9896/285172/51447/23396/5297/145567/22979/8867/3613/375133/5293/728233/472/146850/57217/8821/8871/9021	31
501Mel	GO:0006644	phospholipid metabolic process	131/4741	383/18723	5.60752e-05	0.00137209	0.00114871	80235/9306/114884/6609/8503/128486/23175/5833/5330/56894/23167/9517/9468/5298/5130/55650/54893/347735/10903/57406/50640/63874/55224/3628/375775/129303/84947/54344/51099/5728/4534/10555/51573/8835/11261/9807/3030/6610/79947/284161/137964/7376/9600/5305/57515/4952/20/79837/23659/9926/22908/93210/196463/8395/79575/7920/56895/256987/26751/5333/5296/2055/9896/8760/285172/824/5048/51447/84720/23396/931…	131
501Mel	GO:0051054	positive regulation of DNA metabolic process	76/4741	201/18723	5.76103e-05	0.00140417	0.00117557	11105/7292/2021/10891/2185/10039/79618/8658/400410/2074/56941/23201/5609/57332/5371/5514/54726/10576/6188/79035/2521/11232/64210/1660/8550/672/4931/65057/7515/7040/5982/55183/92345/151636/51720/10728/5558/7486/84250/23347/5985/3320/10694/5580/472/581/3184/165918/2187/10635/79075/8914/4751/958/3181/1499/22976/5983/3178/83666/140609/1736/5111/3146/5984/9212/26354/5888/409/2138/9314/63922/1663/2264/…	76
501Mel	GO:0071526	semaphorin-plexin signaling pathway	22/4741	40/18723	5.88394e-05	0.00142234	0.00119078	10512/5362/57556/80031/4233/4684/10154/10509/5364/10505/396/23616/5365/10371/23654/9464/223117/10501/10507/6405/54910/56920	22
501Mel	GO:0072331	signal transduction by p53 class mediator	64/4741	163/18723	5.89944e-05	0.00142234	0.00119078	5164/29965/10397/26038/754/4646/23368/7157/28996/2475/51741/7917/596/112858/6659/1027/25946/5371/83787/4193/3622/9100/4839/3428/8550/6209/80279/10419/6224/144455/675/6135/6201/51065/472/6125/581/7161/6167/200734/10514/9349/8444/4869/1111/340485/23246/1870/6154/22976/5366/8445/161742/9212/6446/26471/9891/7023/11200/9521/64782/1263/54541/6615	64
501Mel	GO:0006650	glycerophospholipid metabolic process	108/4741	306/18723	5.91409e-05	0.00142234	0.00119078	80235/9306/114884/8503/23175/5833/5330/56894/23167/9468/5298/5130/55650/54893/347735/10903/57406/50640/63874/55224/3628/375775/129303/84947/54344/51099/5728/4534/10555/51573/8835/9807/3030/284161/137964/7376/9600/5305/57515/4952/79837/23659/9926/22908/93210/8395/79575/7920/56895/256987/26751/5333/5296/9896/8760/285172/824/5048/51447/84720/23396/93183/5297/222236/65258/145567/55697/341/22979/51205…	108
501Mel	GO:0034508	centromere complex assembly	18/4741	30/18723	5.92641e-05	0.00142234	0.00119078	6047/51112/80152/54069/1060/9787/11339/1063/64105/55355/3070/1058/23421/387103/9735/64946/4678/1062	18
501Mel	GO:1990778	protein localization to cell periphery	116/4741	333/18723	6.12209e-05	0.00146369	0.0012254	6616/30818/23555/9053/3745/10815/5865/3911/5864/6769/10133/115827/57512/6812/4905/4644/6844/23167/481/582/288/2042/3675/10938/1173/5170/302/30844/10966/55625/51125/129303/91663/5581/51248/30846/6281/9528/999/245812/8548/7275/64689/23241/20/391/90196/1213/65267/254887/25921/287/9581/9341/10890/3728/5911/493/9270/285172/26119/598/1020/8500/353116/55667/8766/57154/27032/55737/25831/26262/1605/22841/…	116
501Mel	GO:0019318	hexose metabolic process	87/4741	237/18723	6.20159e-05	0.00147706	0.0012366	80201/9104/2548/3479/150094/114897/5091/10891/23324/5160/5213/8604/9563/89801/5164/5236/390637/3098/34/5509/79660/2821/23417/32/6652/5465/5165/5208/1737/4125/2932/283209/1374/7157/226/60343/130589/23038/5214/5167/10499/283450/2475/5162/5373/4124/5372/2584/7355/2592/8660/145173/83440/231/3795/11091/221927/25948/23178/3175/10327/10447/1196/132158/467/55657/2683/8864/85414/5366/8445/2582/2648/90007/…	87
501Mel	GO:0051304	chromosome separation	42/4741	96/18723	6.27727e-05	0.00148942	0.00124694	324/2072/55743/129563/9400/25906/56984/10403/29781/80010/64682/10783/55795/55055/9700/699/472/11065/10460/11130/54908/9787/5347/7175/7153/9319/1063/7272/55755/81620/891/990/26271/701/1843/4085/9212/9735/7517/9232/146956/1062	42
501Mel	GO:0035148	tube formation	59/4741	148/18723	6.79841e-05	0.00160095	0.00134031	7042/144165/23242/6385/4524/10370/5566/7189/5898/7798/7849/5567/25/8915/51684/7289/9270/4976/57534/6659/25831/1857/26160/6497/7534/23513/55764/6789/55081/7408/3091/11146/7040/6491/80199/25902/10395/3198/84678/6495/6201/5216/153090/5293/23654/5754/51804/1499/2535/2648/79191/80184/5727/9585/30812/27443/54828/54910/84913	59
501Mel	GO:0044272	sulfur compound biosynthetic process	59/4741	148/18723	6.79841e-05	0.00160095	0.00134031	64131/10861/11046/25874/337876/55902/55256/5160/4143/5164/4524/79094/79993/27010/1738/6487/23657/23417/32/55501/10090/5165/38/3340/1737/2950/7358/2686/3029/79717/29940/5162/51000/9200/54480/8050/2729/4166/9435/60481/262/10327/26035/84245/22856/6482/1836/4780/494143/4507/2181/2180/9060/5163/55790/54898/5166/10402/51703	59
501Mel	GO:0006979	response to oxidative stress	149/4741	446/18723	6.83811e-05	0.00160427	0.00134309	5625/348/2034/221/2110/2021/65018/10891/6648/7001/22933/4482/2185/83636/4137/140885/5164/2113/695/1410/3373/2241/3717/8737/4700/578/23657/50640/406/9131/2950/4720/215/10013/10105/25828/79956/120892/8678/7157/10587/4728/2686/25824/847/25/2775/84883/4233/3163/83959/1244/84181/5970/3162/2055/5663/2074/5601/11030/10533/210/5598/824/3315/596/9973/2729/57332/59338/135112/55967/79109/5371/4170/4193/5513…	149
501Mel	GO:0032388	positive regulation of intracellular transport	76/4741	202/18723	6.97197e-05	0.00162957	0.00136427	3745/22885/65018/487/6844/3717/288/10938/57506/5566/302/125170/30846/51100/999/2932/6342/11261/57214/5058/55823/54471/55929/4641/5296/3728/5663/9270/6721/26119/4947/23011/1020/10075/9638/1778/55072/4193/54741/5116/88/79752/1660/5901/10204/7855/5621/26229/7040/51496/1894/983/2534/55294/9495/9141/5580/10615/22994/1601/10178/7175/80055/2040/6934/3843/4478/7545/975/8851/80184/9585/79899/1263/54828/41…	76
501Mel	GO:0031345	negative regulation of cell projection organization	71/4741	186/18723	7.0045e-05	0.00163109	0.00136554	348/6696/115704/65078/23105/10512/3956/5909/57556/3675/2664/9139/22871/7431/120892/5728/80031/64689/66008/5663/112/10509/3985/5048/1020/7016/5217/57609/10413/4193/10505/2288/1716/9738/146760/2043/5365/10371/5621/5530/6259/25987/1949/2534/3066/83478/7025/9353/5580/57187/5793/8558/223117/10501/349667/8851/9423/23189/10507/26052/6405/2258/2045/4038/54910/56920/22876/3397/4133/1902/10253	71
501Mel	GO:0006120	mitochondrial electron transport, NADH to ubiquinone	26/4741	51/18723	7.28576e-05	0.0016903	0.00141511	65018/4702/4719/4700/1738/4711/57017/374291/4697/4723/4720/4698/4713/4722/4715/4728/4695/4704/4708/4696/4731/4707/4694/4705/4706/4729	26
501Mel	GO:0030258	lipid modification	79/4741	212/18723	7.40213e-05	0.00171096	0.00143241	348/1384/35/1666/2110/10891/80724/57704/2053/3032/1962/30/56898/5264/55343/23409/34/54893/10903/23417/32/10005/5465/10449/38/10994/215/2108/1376/8310/5447/5728/4534/6342/1892/54677/1374/549/3030/4952/20/1891/22908/51/219743/64781/9162/83752/2475/9896/3295/1632/5828/3033/55004/8660/134429/56848/3712/341/10478/8867/160851/7179/26061/8526/8013/8527/114757/84879/8821/8871/154141/347/5166/1608/2583/15…	79
501Mel	GO:0036294	cellular response to decreased oxygen levels	63/4741	161/18723	7.5466e-05	0.00173794	0.001455	2034/2021/65018/10891/4000/22933/64506/8837/112399/10397/23409/10370/9131/5165/10449/5581/6548/10273/5728/10869/7157/80315/101/54471/28996/2475/3162/4976/596/26355/55662/26608/4193/29904/3091/2627/6839/10135/132864/83990/890/1788/29923/30001/4824/23576/79723/3776/891/5366/4780/677/5163/6546/27087/1263/3383/7015/4609/6285/1958/56776/6781	63
501Mel	GO:0015931	nucleobase-containing compound transport	82/4741	222/18723	7.77464e-05	0.00178389	0.00149347	9961/11046/291/284439/55315/8737/55343/79085/9883/8658/92014/23299/215/7048/113829/7263/9197/56648/293/23169/23293/292/4641/6830/51000/3800/100101267/7355/23165/87178/1660/54888/5433/9984/5901/6426/10204/23279/10762/6428/6573/79023/10478/84324/23225/1070/220988/10212/55795/10644/9631/57187/81929/4869/10642/7884/79902/55110/64901/53371/7175/84321/25909/3181/57122/26019/29107/4116/6432/9908/10189/4…	82
501Mel	GO:0046599	regulation of centriole replication	14/4741	21/18723	7.8441e-05	0.00179326	0.00150132	9525/153241/672/7840/6491/79959/85459/152185/4869/55755/10733/2648/55835/8850	14
501Mel	GO:0048511	rhythmic process	105/4741	298/18723	8.01545e-05	0.00182577	0.00152854	5730/7042/148523/150094/114781/6096/1141/6092/80045/3037/10891/23373/4987/23077/2113/79365/3398/8648/3131/22809/5176/406/50865/5465/9500/22871/2932/5728/64839/7157/4669/4704/10499/1408/2767/8863/1453/2475/5601/10533/1020/9572/5927/8945/54850/10075/59338/5371/4791/11335/191/10236/1660/9112/3192/7298/10419/6839/10135/983/7043/3066/7150/55294/25942/4297/9353/55068/6421/3184/10514/4783/408/658/8914/4…	105
501Mel	GO:0006654	phosphatidic acid biosynthetic process	19/4741	33/18723	8.1463e-05	0.00184886	0.00154786	23175/56894/63874/51099/10555/137964/79575/56895/51205/5338/254531/160851/253558/8526/8527/55326/376497/1608/84803	19
501Mel	GO:0046390	ribose phosphate biosynthetic process	72/4741	190/18723	8.1967e-05	0.00185358	0.00155181	8034/10861/9605/25874/55902/65018/221264/10891/203/5313/5160/8604/5164/79993/5836/1738/108/23417/32/5465/5165/38/1737/523/53354/79877/226/79717/84277/55312/10201/50808/5162/79646/51000/112/83549/139596/204/9200/8050/5635/56848/158/1716/1723/7040/60481/1503/8833/11332/4830/5634/4833/471/353/5471/5198/1836/7378/10606/5631/7371/2181/2180/9060/5163/54898/3251/5166/109/51703	72
501Mel	GO:0045936	negative regulation of phosphate metabolic process	147/4741	441/18723	8.60163e-05	0.00193815	0.00162262	7042/9961/348/9104/23530/2039/6609/10891/113791/1845/22933/4137/140885/84327/26524/64780/58533/578/5170/5465/2950/91663/9479/80851/120892/2932/324/5728/11261/10114/56940/7157/5770/808/5305/25/20/79837/5167/28951/1408/11142/2475/5569/5528/5663/9270/5518/25998/1849/5576/94032/5339/3315/7026/7016/22863/11329/4771/7251/1027/8660/5575/65125/54386/1031/9043/103/7529/135228/10221/9258/84959/10527/5783/5…	147
501Mel	GO:0048813	dendrite morphogenesis	58/4741	146/18723	8.74492e-05	0.00196338	0.00164374	547/1501/6792/1141/11178/221692/23363/9201/9820/1139/10013/22871/120892/2932/5728/54664/64689/66008/26037/10458/26039/57498/5911/10160/1523/5048/4976/23011/1020/9344/7436/51188/2043/29904/10371/84062/10152/5530/2534/3688/85358/23043/26115/473/22903/10642/55619/84079/8851/10507/26052/3251/7804/4038/55607/3397/4133/5789	58
501Mel	GO:0090068	positive regulation of cell cycle process	86/4741	236/18723	9.17055e-05	0.00205158	0.00171758	3479/11105/22933/3373/6604/5581/8678/10869/23276/9371/10755/9525/26073/131870/8766/1778/5514/29127/4193/7027/994/5889/10403/23137/153241/55920/79848/9984/3192/83695/2237/1894/983/144455/55795/25942/84250/8317/9700/85459/113130/10615/11065/6421/80174/9787/10635/8444/4869/7175/8558/6840/8502/51514/8556/2146/9928/81620/891/990/81610/26271/10733/10926/51203/27085/995/993/4085/79733/9212/7517/5902/111…	86
501Mel	GO:0008361	regulation of cell size	69/4741	181/18723	9.21528e-05	0.00205425	0.00171982	348/6696/6792/65078/23105/10512/4131/1954/4137/10439/57556/11344/57698/2664/2932/5728/80031/5058/23038/3984/25/1982/65267/659/2475/1182/2055/10509/5048/23011/1020/9798/8766/57609/150465/10505/10723/1207/10371/128239/23499/6560/6259/85358/25942/10000/4869/7410/223117/10501/114908/1808/23108/4478/4825/2803/5027/8851/9423/10507/2784/6557/6405/23566/2258/2045/54910/56920/4133	69
501Mel	GO:0034501	protein localization to kinetochore	13/4741	19/18723	9.54822e-05	0.00211343	0.00176936	51112/283489/10403/55920/983/55055/54908/7272/81620/55166/27085/9212/9735	13
501Mel	GO:1903083	protein localization to condensed chromosome	13/4741	19/18723	9.54822e-05	0.00211343	0.00176936	51112/283489/10403/55920/983/55055/54908/7272/81620/55166/27085/9212/9735	13
501Mel	GO:0010563	negative regulation of phosphorus metabolic process	147/4741	442/18723	9.71056e-05	0.00214179	0.00179311	7042/9961/348/9104/23530/2039/6609/10891/113791/1845/22933/4137/140885/84327/26524/64780/58533/578/5170/5465/2950/91663/9479/80851/120892/2932/324/5728/11261/10114/56940/7157/5770/808/5305/25/20/79837/5167/28951/1408/11142/2475/5569/5528/5663/9270/5518/25998/1849/5576/94032/5339/3315/7026/7016/22863/11329/4771/7251/1027/8660/5575/65125/54386/1031/9043/103/7529/135228/10221/9258/84959/10527/5783/5…	147
501Mel	GO:0140056	organelle localization by membrane tethering	35/4741	77/18723	9.82387e-05	0.00215918	0.00180766	6616/11149/3745/5865/10768/5864/115827/6812/4905/858/57617/54843/10497/9751/23241/55823/60412/8615/9342/9341/10890/6811/22863/23673/8417/5872/8676/6804/55014/10244/2054/10228/51134/1488/80184	35
501Mel	GO:0046785	microtubule polymerization	37/4741	83/18723	0.000104293	0.00228423	0.00191235	122060/57704/4131/4137/89795/10382/8874/5058/25/22924/4233/2801/1453/6249/23271/24139/402/1027/57606/2288/6188/3925/51199/10426/284001/11076/440145/403/22974/10142/55755/26271/8851/84722/55835/2258/4133	37
501Mel	GO:0018107	peptidyl-threonine phosphorylation	48/4741	116/18723	0.000107542	0.00234719	0.00196507	2039/22933/8658/5566/5170/7786/120892/2932/7048/10114/57214/5578/808/65267/28996/2475/8476/5528/5579/817/1020/596/65125/51701/29110/388228/1195/7040/983/8312/5580/56288/200734/7046/5347/8444/1111/8558/7272/8445/161742/8851/7443/11113/4092/9294/54541/10253	48
501Mel	GO:0007044	cell-substrate junction assembly	41/4741	95/18723	0.000110606	0.0024043	0.00201288	22998/2039/1845/2185/7414/10391/6385/2042/7094/5170/8874/6548/6281/5728/56940/25/667/7205/8861/9270/26073/10420/5339/596/9344/9748/10979/88/55920/90102/23499/23603/10395/3655/1946/3915/3673/5796/347/87/54828	41
501Mel	GO:0051236	establishment of RNA localization	64/4741	166/18723	0.000110926	0.0024043	0.00201288	9961/9883/8658/23299/7048/7263/56648/23293/4641/6830/3800/100101267/23165/87178/1660/54888/5433/7013/9984/5901/6426/10204/23279/10762/6428/79023/84324/23225/1070/220988/10212/55795/10644/9631/472/57187/81929/4869/10642/7884/79902/55110/64901/53371/7175/84321/25909/3181/57122/26019/29107/4116/6432/9908/10189/4927/3178/55706/6741/65109/129401/677/7538/3087	64
501Mel	GO:2000573	positive regulation of DNA biosynthetic process	31/4741	66/18723	0.000114271	0.00246825	0.00206641	2185/79618/8658/5609/10576/11232/8550/4931/65057/5982/92345/10728/5985/3320/10694/472/79075/4751/1499/5983/3178/140609/1736/5111/5984/9212/409/9314/63922/2264/4609	31
501Mel	GO:0048066	developmental pigmentation	23/4741	44/18723	0.000114768	0.00247048	0.00206828	1638/4948/10981/7306/5873/9839/51151/4208/4435/5167/4935/4286/2767/8907/79803/164/596/7299/283652/55686/8975/581/84079	23
501Mel	GO:1903050	regulation of proteolysis involved in cellular protein catabolic process	81/4741	221/18723	0.000115705	0.0024821	0.00207801	144165/348/9104/65018/10444/9604/22933/2185/84074/255488/11337/23376/54467/5566/3300/10273/120892/2932/5728/10869/114881/51684/28951/79699/28952/11236/28996/1453/55743/10755/6815/5663/5601/11345/55070/29978/210/7917/8945/7110/369/57154/91445/25831/2729/5371/51136/4193/2295/10221/2043/55872/51377/11146/6613/7341/5310/8975/991/55294/6135/6201/4130/153090/8312/6125/6386/5347/9349/1601/85409/9532/478…	81
501Mel	GO:0031113	regulation of microtubule polymerization	27/4741	55/18723	0.000122735	0.00262393	0.00219675	122060/57704/4131/4137/89795/10382/8874/5058/25/22924/4233/6249/23271/24139/402/1027/57606/2288/6188/3925/51199/403/10142/55755/8851/84722/4133	27
501Mel	GO:0072175	epithelial tube formation	53/4741	132/18723	0.000124772	0.0026584	0.00222561	7042/144165/23242/6385/4524/10370/5566/7189/5898/7798/7849/5567/25/8915/51684/7289/4976/57534/6659/25831/1857/26160/6497/23513/55764/6789/55081/7408/3091/11146/7040/6491/80199/25902/10395/84678/6495/6201/5216/5293/23654/5754/51804/1499/2535/2648/79191/80184/5727/9585/30812/27443/54910	53
501Mel	GO:0050769	positive regulation of neurogenesis	82/4741	225/18723	0.000131214	0.0027802	0.00232758	443/1638/6792/4747/6092/5362/4131/1954/4137/3398/23363/9820/23376/11344/5176/57698/6604/2664/5058/22954/3984/10458/1982/659/26039/2475/10154/5970/5364/1523/5048/4976/23011/9798/4124/8766/1605/5584/51188/2043/6498/29904/23013/51199/5365/3091/23499/27339/5583/7040/10419/51593/8867/6091/3066/259266/85358/9353/23654/7161/4067/1499/4673/84079/4825/2803/9423/274/10507/26230/7516/10215/4311/7804/23566/7…	82
501Mel	GO:0071456	cellular response to hypoxia	59/4741	151/18723	0.000131492	0.0027802	0.00232758	2034/2021/65018/10891/4000/22933/64506/8837/112399/10397/23409/10370/5165/10449/5581/6548/10273/5728/10869/7157/101/54471/28996/2475/3162/4976/596/26355/55662/26608/4193/3091/2627/6839/132864/83990/890/1788/29923/30001/4824/23576/79723/3776/891/5366/4780/677/5163/6546/27087/1263/3383/7015/4609/6285/1958/56776/6781	59
501Mel	GO:0010720	positive regulation of cell development	104/4741	298/18723	0.00013182	0.0027802	0.00232758	443/55679/1638/6792/4747/2039/6092/3037/537/5362/22933/4131/1954/4137/118/3398/23363/9820/23376/11344/5176/57698/6604/8874/91663/2664/6281/5058/11078/22954/3984/25/10458/1982/659/26039/2475/10154/5970/5364/1523/5048/4976/23011/9798/596/4124/7016/8766/1605/10221/10979/5584/51188/2043/6498/29904/23013/51199/5365/3091/23499/27339/5583/7040/10419/51593/8867/6091/3066/259266/85358/9353/23654/7161/4067…	104
501Mel	GO:0010498	proteasomal protein catabolic process	160/4741	490/18723	0.000137592	0.0028922	0.00242134	144165/348/342897/5699/9306/65018/10444/26232/9604/22933/92305/23510/255488/11337/93611/23376/54467/23053/406/5566/79089/10513/3300/26270/57414/6468/23304/10273/120892/2932/64839/4189/51185/10869/6047/114881/7126/23008/84236/80344/26234/122416/28951/79654/79699/7328/23321/11236/84301/10116/25827/201595/149603/55666/11059/1453/64777/130507/7466/55743/10755/55284/27252/9870/51439/202052/6815/5663/3…	160
501Mel	GO:0009124	nucleoside monophosphate biosynthetic process	22/4741	42/18723	0.000154733	0.00323083	0.00270485	7084/55312/83549/139596/158/1716/1723/7298/7083/8833/5634/471/353/1854/5471/100/5198/7378/10606/5631/7371/3251	22
501Mel	GO:0051452	intracellular pH reduction	22/4741	42/18723	0.000154733	0.00323083	0.00270485	1657/23312/155066/50617/84317/9114/2896/535/25932/54664/1182/8992/596/51606/1203/55647/7879/54982/23545/10312/7274/54734	22
501Mel	GO:0048193	Golgi vesicle transport	103/4741	296/18723	0.00016058	0.00334177	0.00279772	10133/2060/23233/4905/4644/6844/10079/582/1314/51272/340371/288/22820/79090/55763/51479/11015/399687/51125/23299/8775/120892/9382/8548/2619/10564/54832/6845/9632/22872/3064/11070/8729/58485/90196/60412/5877/8615/28952/23041/11236/2801/126003/553115/55614/51112/6272/1453/1315/9581/27252/5861/9341/10890/160/8724/11345/81555/5870/29959/9527/6811/9117/1523/81876/164/149371/55062/60684/29934/10483/270…	103
501Mel	GO:0007623	circadian rhythm	77/4741	210/18723	0.000165585	0.00343452	0.00287537	5730/148523/150094/114781/6096/1141/80045/10891/23373/4987/23077/79365/3398/22809/406/50865/5465/9500/22871/2932/5728/64839/7157/4669/4704/10499/1408/2767/8863/1453/2475/5601/10533/9572/5927/8945/54850/10075/5371/191/10236/9112/3192/7298/10419/6839/10135/983/3066/7150/55294/25942/4297/6421/3184/10514/4783/8914/463/7153/100/8864/79723/2146/23596/3399/25819/8553/687/196/56938/3400/7071/221391/1960/…	77
501Mel	GO:0000377	RNA splicing, via transesterification reactions with bulged adenosine as nucleophile	110/4741	320/18723	0.000170027	0.00350346	0.00293309	57060/10179/60677/83989/7375/10150/10659/23020/25980/55225/3191/8487/4857/4809/4236/10946/10283/51319/25929/84991/55280/10921/9129/8161/26986/55692/51691/51574/10236/1660/9410/6625/1207/8175/6426/3192/55596/27339/23398/6629/143884/55660/84844/10772/26121/6428/6434/9904/10419/27316/8233/4670/54883/50628/220988/10492/10212/3183/6427/9879/10250/51645/84811/2483/6936/6634/84950/57819/6631/28960/11218…	110
501Mel	GO:0000398	mRNA splicing, via spliceosome	110/4741	320/18723	0.000170027	0.00350346	0.00293309	57060/10179/60677/83989/7375/10150/10659/23020/25980/55225/3191/8487/4857/4809/4236/10946/10283/51319/25929/84991/55280/10921/9129/8161/26986/55692/51691/51574/10236/1660/9410/6625/1207/8175/6426/3192/55596/27339/23398/6629/143884/55660/84844/10772/26121/6428/6434/9904/10419/27316/8233/4670/54883/50628/220988/10492/10212/3183/6427/9879/10250/51645/84811/2483/6936/6634/84950/57819/6631/28960/11218…	110
501Mel	GO:0046473	phosphatidic acid metabolic process	20/4741	37/18723	0.000174917	0.00359239	0.00300754	23175/56894/63874/51099/10555/137964/79575/56895/51205/5338/254531/160851/253558/8526/8527/55326/8398/376497/1608/84803	20
501Mel	GO:0140029	exocytic process	34/4741	76/18723	0.000179917	0.00368301	0.00308341	6616/3745/10815/5865/2039/5864/115827/6812/23233/695/57617/54843/10497/9751/8775/22871/6845/55823/60412/9342/9341/10890/5663/8773/5872/23513/8676/6804/8867/10244/2054/4067/9900/1488	34
501Mel	GO:0000375	RNA splicing, via transesterification reactions	111/4741	324/18723	0.000185006	0.00377485	0.0031603	57060/10179/60677/83989/7375/10150/10659/23020/25980/55225/3191/8487/4857/4809/4236/10946/10283/51319/25929/84991/55280/10921/9129/8161/26986/55692/51691/51574/10236/1660/9410/6625/1207/8175/6426/3192/55596/27339/23398/6629/143884/55660/84844/10772/26121/6428/6434/9904/10419/27316/8233/4670/54883/50628/220988/10492/10212/3183/6427/9879/10250/51645/84811/2483/10199/6936/6634/84950/57819/6631/28960…	111
501Mel	GO:0033673	negative regulation of kinase activity	85/4741	237/18723	0.000186935	0.00380181	0.00318287	9961/348/9104/6609/113791/1845/4137/26524/58533/5170/2950/9479/80851/324/5728/11261/10114/56940/5770/5305/25/79837/28951/11142/5569/5663/9270/25998/1849/5576/94032/5339/3315/7026/7016/11329/4771/7251/1027/8660/5575/65125/1031/103/10221/84959/10527/84062/3192/104/80279/26973/23603/9467/868/153090/5580/54892/5573/1030/5347/11221/4869/4067/5997/3843/90007/161742/1843/7023/3087/1029/57761/79007/6546/…	85
501Mel	GO:0006661	phosphatidylinositol biosynthetic process	52/4741	131/18723	0.000201982	0.00409455	0.00342795	80235/9306/8503/23167/5298/55650/3628/129303/54344/5728/4534/8835/9807/9600/5305/4952/79837/22908/93210/8395/26751/5296/9896/285172/51447/84720/23396/93183/5297/65258/145567/55697/22979/5283/8867/3613/375133/57605/5293/728233/5277/472/8526/146850/9487/80055/57217/8821/8871/9021/376497/22876	52
501Mel	GO:0009260	ribonucleotide biosynthetic process	68/4741	182/18723	0.000206633	0.00417532	0.00349557	8034/10861/9605/25874/55902/65018/221264/10891/203/5313/5160/8604/5164/79993/1738/108/23417/32/5465/5165/38/1737/523/53354/79877/226/79717/84277/55312/10201/50808/5162/79646/51000/112/83549/139596/204/9200/8050/56848/158/1716/1723/7040/60481/1503/8833/11332/4830/4833/471/353/5471/5198/1836/7378/10606/7371/2181/2180/9060/5163/54898/3251/5166/109/51703	68
501Mel	GO:0050657	nucleic acid transport	62/4741	163/18723	0.00021842	0.00438519	0.00367128	9961/9883/8658/23299/7048/7263/56648/23293/4641/6830/3800/100101267/23165/87178/1660/54888/5433/9984/5901/6426/10204/23279/10762/6428/79023/84324/23225/1070/220988/10212/55795/10644/9631/57187/81929/4869/10642/7884/79902/55110/64901/53371/7175/84321/25909/3181/57122/26019/29107/4116/6432/9908/10189/4927/3178/55706/6741/65109/129401/677/7538/3087	62
501Mel	GO:0050658	RNA transport	62/4741	163/18723	0.00021842	0.00438519	0.00367128	9961/9883/8658/23299/7048/7263/56648/23293/4641/6830/3800/100101267/23165/87178/1660/54888/5433/9984/5901/6426/10204/23279/10762/6428/79023/84324/23225/1070/220988/10212/55795/10644/9631/57187/81929/4869/10642/7884/79902/55110/64901/53371/7175/84321/25909/3181/57122/26019/29107/4116/6432/9908/10189/4927/3178/55706/6741/65109/129401/677/7538/3087	62
501Mel	GO:0051056	regulation of small GTPase mediated signal transduction	104/4741	302/18723	0.000233317	0.00465726	0.00389905	7042/348/64787/57636/3479/9649/65078/89846/29/50650/11337/51306/5909/55103/23263/3675/80728/7077/9922/9927/57186/25894/9289/10564/6494/55114/57514/26037/7126/26030/6655/25/4233/8729/10565/23365/57148/23229/4649/121512/10672/253959/26269/84078/55667/392/8036/2059/55160/8216/79109/57221/55738/29127/396/3925/23616/9828/9824/10982/115557/1894/117178/2149/6091/83478/3688/10395/9353/9181/153090/23607/4…	104
501Mel	GO:0006469	negative regulation of protein kinase activity	77/4741	212/18723	0.000233458	0.00465726	0.00389905	9961/348/9104/6609/1845/26524/58533/5170/2950/9479/80851/324/5728/11261/10114/56940/5770/25/28951/11142/5569/5663/9270/25998/1849/5576/94032/5339/3315/7026/7016/11329/4771/7251/1027/5575/1031/103/10221/84959/10527/84062/104/80279/26973/23603/9467/868/153090/5580/54892/5573/1030/5347/11221/4869/4067/5997/3843/161742/1843/7023/3087/1029/57761/79007/6546/5577/4041/8850/634/4616/7128/10252/10019/1025…	77
501Mel	GO:0000302	response to reactive oxygen species	80/4741	222/18723	0.000238744	0.0047476	0.00397469	348/2021/65018/10891/6648/7001/2185/4137/140885/5164/2113/695/1410/3373/2241/8737/578/9131/2950/10013/10105/120892/8678/10587/25824/847/25/2775/4233/5970/3162/2074/5601/5598/824/596/9973/57332/59338/4193/55139/8754/5052/6188/388/10280/2643/3091/5829/6434/1894/983/2534/3066/5580/1719/7168/7351/8013/100/2308/7703/2146/5074/3939/4780/7295/5111/116988/1843/9314/10276/5796/347/10628/6546/133522/1263/7…	80
501Mel	GO:1901798	positive regulation of signal transduction by p53 class mediator	15/4741	25/18723	0.000247492	0.00490598	0.00410728	26038/25946/6209/80279/6224/6135/6201/472/6167/200734/9349/6154/5366/161742/9521	15
501Mel	GO:0032204	regulation of telomere maintenance	35/4741	80/18723	0.000248314	0.00490676	0.00410793	79618/8658/2072/26277/23293/5609/54386/5371/5514/10576/79035/8550/7013/65057/3192/7515/92345/80169/3183/5394/167227/10694/472/3184/4751/3181/1499/3178/140609/1736/9212/26354/54984/80119/4609	35
501Mel	GO:0007569	cell aging	52/4741	132/18723	0.000252169	0.00496725	0.00415857	4000/6926/3398/80317/10370/406/4215/5728/7157/25/2475/5601/4976/596/5609/1027/5371/3622/5606/23137/87178/8550/1021/10135/983/10783/80169/26156/7486/675/5933/83719/5580/472/10000/1030/4869/1111/5074/26271/50507/57178/9891/3159/11200/384/9521/1029/4311/3383/7015/8091	52
501Mel	GO:0051382	kinetochore assembly	12/4741	18/18723	0.000261528	0.00513545	0.00429939	6047/51112/80152/1060/9787/1063/64105/1058/387103/9735/64946/1062	12
501Mel	GO:0060271	cilium assembly	114/4741	337/18723	0.000268601	0.00525787	0.00440188	200162/79925/6792/83547/115704/129880/25809/22885/3911/25981/55742/79874/582/10938/9114/10096/30844/10013/140735/30846/4750/51382/1769/51524/4952/9371/3064/8729/29070/283232/55717/9342/1453/79770/27241/84902/3985/146057/353116/7016/11158/8195/1540/727764/26160/6102/23386/138639/10413/54970/49856/11190/29105/65062/55764/9738/55081/5116/153241/9857/79867/95681/347240/345643/80199/200894/80173/55036…	114
501Mel	GO:0045851	pH reduction	23/4741	46/18723	0.000272398	0.00528299	0.00442291	1657/537/23312/155066/50617/84317/9114/2896/535/25932/54664/1182/8992/596/51606/1203/55647/7879/54982/23545/10312/7274/54734	23
501Mel	GO:0050919	negative chemotaxis	23/4741	46/18723	0.000272398	0.00528299	0.00442291	6092/10512/57556/80031/10509/23767/10505/10718/10371/6259/6091/9353/223117/10501/9423/10507/6585/6405/2045/54910/23768/56920/1803	23
501Mel	GO:0046486	glycerolipid metabolic process	130/4741	392/18723	0.000272415	0.00528299	0.00442291	348/80235/9104/150094/9306/114884/8503/128486/23175/5833/5330/56894/23167/9468/5298/5130/55650/54893/347735/255919/10903/57406/50640/8228/63874/55224/3628/375775/129303/84947/54344/64900/51099/5728/4534/10555/51573/8835/1374/9807/3030/284161/137964/7376/9600/5305/57515/847/4952/79837/23659/9926/22908/93210/8395/79575/7920/9162/56895/256987/26751/5333/5296/9896/8760/285172/747/824/5048/51447/84720…	130
501Mel	GO:0031570	DNA integrity checkpoint signaling	49/4741	123/18723	0.000274636	0.00530679	0.00444283	26270/1112/7157/10116/2074/6659/9344/1027/5371/5514/4193/54465/672/9984/27339/83695/80279/983/51720/84444/8883/83990/79621/11073/51065/472/79968/63967/5347/1111/8914/51514/9656/6154/1763/81620/990/55159/4998/54962/2177/90381/146956/11200/641/8318/1263/595/8091	49
501Mel	GO:0044782	cilium organization	123/4741	368/18723	0.000275336	0.00530679	0.00444283	200162/79925/6792/83547/115704/129880/25809/22885/26074/3911/25981/55742/79874/145483/11020/582/10938/9114/10096/30844/10013/140735/30846/4750/7275/51382/1769/51524/4952/22920/9371/3064/8729/29070/283232/55717/9342/1453/79770/27241/84902/3985/146057/353116/7016/11158/8195/1540/727764/26160/6102/23386/138639/10413/54970/49856/11190/29105/65062/55764/9738/55081/5116/153241/9857/84131/79867/95681/34…	123
501Mel	GO:1903828	negative regulation of cellular protein localization	47/4741	117/18723	0.000288936	0.00555183	0.00464798	58476/2039/4137/56957/26524/9201/1173/9500/2664/166614/9528/120892/2932/11261/51684/1213/11142/5569/9270/146057/598/1020/8500/25885/25831/51569/257364/1495/54741/3638/9258/88/7013/54585/3998/7040/7341/25942/4130/55432/1601/58489/81620/580/7295/347/89958	47
501Mel	GO:0046434	organophosphate catabolic process	59/4741	155/18723	0.000299176	0.005731	0.00479798	5138/79873/6609/128486/957/56953/254552/283927/23417/57406/50640/3628/375775/1267/38/215/5728/51573/6610/284161/4952/5167/23659/196463/7920/131870/200035/390916/222236/5150/341/10591/30833/8867/8930/8654/3949/55627/3613/10924/5142/11164/5580/11332/79077/1854/100/11163/7378/9588/8398/8821/8871/953/4860/3251/5141/27115/22876	59
501Mel	GO:0016482	cytosolic transport	63/4741	168/18723	0.00030825	0.00588682	0.00492844	547/83547/2060/10079/58533/51272/51479/9827/55111/25938/120892/8678/54832/54497/5305/55823/8729/90196/9779/1213/23041/55275/55614/6272/9581/27252/9341/22836/160/8724/219931/5870/9527/6811/23011/64400/164/79735/55062/29934/1203/23085/55737/112936/9043/7879/143187/51560/9648/10772/55658/10228/26115/26088/29062/1601/27147/27131/8411/84079/4478/30845/4133	63
501Mel	GO:1901976	regulation of cell cycle checkpoint	18/4741	33/18723	0.000316758	0.00603093	0.00504908	10116/5514/25906/54465/10403/9984/55795/79621/79968/7175/55755/81620/891/55159/1843/4085/7517/11200	18
501Mel	GO:1901653	cellular response to peptide	120/4741	359/18723	0.000323429	0.00613927	0.00513979	478/3479/10768/2805/2549/8503/5313/23175/29988/23621/4131/64506/4644/5164/6844/858/8837/2241/3717/58533/2101/23641/5170/55625/2950/64900/6548/7431/2932/324/5447/5728/8835/5058/7157/5770/23038/5305/79837/10458/55777/5167/8615/10999/781/4641/5296/5970/10890/5579/5663/112/23235/57727/4976/1020/55667/2729/8660/4193/54741/3638/5872/5584/57085/88/2043/231/29904/5829/5621/8412/10135/2534/132864/83990/91…	120
501Mel	GO:0072523	purine-containing compound catabolic process	25/4741	52/18723	0.000327056	0.00618935	0.00518172	5138/79873/128486/254552/283927/23417/38/215/161823/131870/390916/5150/191/10591/30833/4521/8654/5142/11332/100/11163/4860/3251/5141/27115	25
501Mel	GO:1901796	regulation of signal transduction by p53 class mediator	39/4741	93/18723	0.00033032	0.0062323	0.00521767	26038/754/7157/28996/2475/596/112858/25946/83787/4193/3622/4839/8550/6209/80279/10419/6224/6135/6201/472/6125/6167/200734/9349/8444/4869/1111/23246/6154/5366/8445/161742/9212/6446/9891/11200/9521/1263/6615	39
501Mel	GO:0048588	developmental cell growth	83/4741	234/18723	0.000332554	0.00625562	0.00523719	348/6696/3479/6792/65078/23105/10512/3913/4131/1954/7414/4137/23242/79594/10439/57556/9201/9472/11344/57698/80208/5465/2664/4692/10013/2932/80031/7048/5058/3984/25/1982/3275/659/2475/10509/5048/23011/1020/9798/23767/8766/57154/57609/9043/150465/10505/10038/51199/10371/23499/6259/3688/25942/9353/8936/9962/3320/203228/8470/114804/5997/1499/223117/10501/1808/4825/2803/51320/8851/9423/10507/6585/4092…	83
501Mel	GO:0031647	regulation of protein stability	102/4741	298/18723	0.000341672	0.00640303	0.00536061	3479/65018/10891/6812/55742/4000/573/84327/79594/1410/481/10169/22848/5476/51125/79763/2896/54344/10013/51100/10273/120892/5728/11261/10869/7157/55664/55823/3064/4047/11236/84301/3920/8863/287/7466/55743/10755/7375/9101/1389/23011/7917/5828/9572/596/8945/5217/825/4771/23673/6659/55737/1857/6400/5190/51701/84897/4193/10576/6789/11140/2043/902/23560/5621/9960/1022/10728/7341/8975/23162/55294/6135/6…	102
501Mel	GO:0018105	peptidyl-serine phosphorylation	107/4741	315/18723	0.000342436	0.00640303	0.00536061	375449/202374/2039/65018/26524/8737/578/9201/8658/5566/5170/5165/5581/10013/282974/7786/23012/166614/120892/2932/5728/7048/10114/5058/5578/57172/127933/9641/22983/28996/1453/64324/8986/2475/8569/5579/493/5601/817/53944/1389/5598/146057/1020/596/5217/11329/369/51231/65125/54386/79109/85440/51701/29110/5584/6789/154043/388228/8550/9024/1455/1195/9874/5583/8412/7040/84930/983/10783/5334/5310/29941/7…	107
501Mel	GO:0051170	import into nucleus	60/4741	159/18723	0.000349306	0.00651207	0.00545189	144165/9670/4000/9679/3717/9883/57506/754/999/120892/11261/7157/51684/1408/55929/11142/5296/5569/3728/5663/5571/100101267/5371/5514/51569/1871/10527/5901/10204/10762/7040/3838/5530/1894/983/7341/3621/868/51194/9631/5580/9349/55374/79902/64901/53371/7175/57122/29107/1434/4927/3843/3178/7545/129401/60468/9221/347/10628/10758	60
501Mel	GO:0007163	establishment or maintenance of cell polarity	78/4741	218/18723	0.000364727	0.00677937	0.00567568	9053/51421/9886/55742/4000/2185/4131/10486/1741/57698/399687/10096/10090/55333/51248/6548/25932/2932/5058/3064/8729/391/667/10565/4649/10890/22836/5048/23625/9638/22841/85440/84552/1495/23513/5584/10403/388/23616/9024/23150/10312/5310/23322/3688/3993/3320/56288/10615/5754/54908/5347/54509/11004/55755/9124/4478/1058/9265/154810/123016/4085/5881/23189/284217/7465/9585/84612/6624/10758/89958/2258/54…	78
501Mel	GO:0009161	ribonucleoside monophosphate metabolic process	27/4741	58/18723	0.000370585	0.00686787	0.00574977	221264/203/260425/9414/55312/50808/83549/139596/204/4354/158/30833/1723/8833/5634/471/353/5471/100/5198/7378/10606/5631/7371/4860/3251/136332	27
501Mel	GO:0051984	positive regulation of chromosome segregation	10/4741	14/18723	0.000380698	0.00703448	0.00588926	22933/8678/23137/55920/3192/56852/81620/891/990/9212	10
501Mel	GO:0006090	pyruvate metabolic process	43/4741	106/18723	0.000400297	0.00737488	0.00617424	80201/3479/4967/55753/25874/5091/10891/5313/957/5160/5213/5164/5236/112817/3098/1738/2821/5465/5165/5208/1737/226/5214/5162/11182/5663/5571/402/2584/8050/83440/3091/9759/8013/339123/3939/5027/26471/3099/5163/5166/54541/863	43
501Mel	GO:0050771	negative regulation of axonogenesis	29/4741	64/18723	0.000402647	0.00737631	0.00617543	6696/65078/23105/10512/57556/2664/5728/80031/66008/5663/10509/1020/57609/10505/10371/6259/1949/223117/10501/8851/9423/10507/6405/2258/2045/4038/54910/56920/4133	29
501Mel	GO:0043523	regulation of neuron apoptotic process	76/4741	212/18723	0.000402729	0.00737631	0.00617543	7042/348/3745/6620/4747/7020/64802/4835/65018/10891/6648/6812/23621/2185/2632/3717/58533/112399/340371/4296/2821/9131/5170/2896/842/7157/80315/101/4208/4435/80331/23321/28996/7466/3162/5663/598/1020/596/2729/4170/5584/10280/3091/6418/5621/7043/2534/2149/8883/55294/84678/6495/1649/5641/581/9759/408/51804/1499/9928/7301/4605/8851/1051/26471/409/1745/7516/2065/4929/3672/2045/7015/10763/5803	76
501Mel	GO:0070584	mitochondrion morphogenesis	13/4741	21/18723	0.000422295	0.00769602	0.0064431	4534/26073/80224/598/4976/5339/9638/87178/11232/81892/6742/8936/581	13
501Mel	GO:0090316	positive regulation of intracellular protein transport	60/4741	160/18723	0.000422642	0.00769602	0.0064431	3745/22885/65018/6844/3717/288/57506/5566/125170/51100/999/2932/11261/57214/5058/55823/54471/55929/4641/5296/3728/5663/9270/6721/4947/1020/10075/55072/4193/54741/5116/79752/5901/10204/7855/5621/26229/7040/51496/1894/983/2534/55294/9495/9141/5580/22994/10178/7175/2040/6934/3843/7545/975/8851/80184/9585/79899/1263/54828	60
501Mel	GO:0006006	glucose metabolic process	71/4741	196/18723	0.000435945	0.00791524	0.00662662	9104/2548/3479/150094/114897/5091/10891/5160/5213/8604/9563/89801/5164/5236/390637/3098/34/5509/79660/2821/23417/32/6652/5465/5165/5208/1737/2932/283209/1374/7157/60343/130589/23038/5214/5167/10499/283450/2475/5162/8660/83440/3795/11091/221927/25948/23178/3175/10327/10447/1196/467/55657/8864/85414/5366/8445/2648/90007/2542/3146/2784/3099/5163/347/5166/4041/8850/114899/4938/7262	71
501Mel	GO:0051017	actin filament bundle assembly	59/4741	157/18723	0.000440864	0.00798142	0.00668203	22998/119/2039/2185/118/10391/6385/221692/64780/5358/6548/6281/5058/7126/57175/3984/25/10458/4233/2475/9270/8500/7016/5217/8195/4771/2059/55160/10979/3925/7840/90102/5829/7043/4082/10395/85358/5216/7046/7168/408/3693/7184/5074/9124/50507/123016/5357/29109/6624/87/23075/55971/55607/4739/3397/3936/1902/56776	59
501Mel	GO:0016311	dephosphorylation	136/4741	417/18723	0.00044342	0.00800456	0.00670141	7042/9104/5526/127495/11156/10076/128853/6609/55313/1850/151742/65018/1845/23175/2053/56953/64759/3717/5509/53/79660/54893/255919/10903/3628/5208/64900/11099/80824/120892/2932/5728/4534/147699/11261/56940/5723/5770/4208/84064/808/4952/3064/29085/22908/1408/51559/23293/150290/2475/79178/5528/6815/9896/5518/79624/1849/9701/84792/131870/27068/596/8945/54949/51231/3476/7529/138639/5423/994/5519/55291…	136
501Mel	GO:1901293	nucleoside phosphate biosynthetic process	89/4741	256/18723	0.000445211	0.0080138	0.00670914	8034/23057/10861/9605/25874/64802/55902/65018/221264/10891/203/5313/5160/8604/5164/79993/1738/108/27231/7084/23417/32/5465/5165/38/1737/523/53354/79877/23475/226/79717/84277/55312/10201/50808/5162/79646/51000/112/83549/139596/204/9200/8050/5635/56848/158/1716/6240/1723/7040/7298/9519/60481/10135/6241/1841/7083/1503/8833/11332/102157402/4830/5634/4833/471/353/1854/5471/100/5198/1836/83666/7378/106…	89
501Mel	GO:0009113	purine nucleobase biosynthetic process	8/4741	10/18723	0.000455545	0.00817631	0.0068452	6470/8833/353/5471/100/10606/5631/3251	8
501Mel	GO:0007224	smoothened signaling pathway	53/4741	138/18723	0.000459787	0.00822887	0.00688919	80274/55733/85455/1954/11020/5566/283219/3340/5447/64839/7048/2619/2121/5567/23295/5167/51684/55717/28996/79770/7289/146057/8945/26160/26091/64927/1495/55764/55081/79867/50937/51377/6491/80199/200894/51668/23322/199221/79809/2622/403/27148/23432/92344/221914/22856/8445/4825/7545/5727/7480/860/3280	53
501Mel	GO:0007033	vacuole organization	66/4741	180/18723	0.000465277	0.00830341	0.0069516	58476/2548/23130/65018/11337/90678/80317/53/84317/57617/80208/302/2896/23710/411/8406/51100/9927/120892/4534/1200/54664/8678/23241/4669/5305/55823/79837/2475/5861/81631/2055/9896/55102/5663/219931/11345/29978/10533/256471/64400/81876/4124/22863/55062/84286/9638/55004/1203/23673/57154/165324/22930/55647/7879/54982/55254/55014/23400/55353/10312/89849/203228/3074/26471/54734	66
501Mel	GO:0032210	regulation of telomere maintenance via telomerase	25/4741	53/18723	0.00047137	0.00838824	0.00702262	79618/8658/26277/23293/5609/10576/8550/7013/65057/3192/92345/80169/3183/5394/167227/10694/472/4751/1499/3178/140609/1736/9212/54984/80119	25
501Mel	GO:0030902	hindbrain development	57/4741	151/18723	0.000479087	0.00850143	0.00711738	51286/18/6331/4967/25809/10891/1272/5362/23026/8925/8648/6712/22809/27089/5058/7157/4669/25/1152/8861/57502/2296/9935/5663/146057/1020/596/23513/7515/200894/8624/51176/23322/3688/10395/84678/79809/869/79971/3184/473/471/1499/3975/2146/9928/2648/8851/482/340719/80184/3199/54910/2637/4983/1959/3280	57
501Mel	GO:0032535	regulation of cellular component size	126/4741	383/18723	0.000480842	0.00850846	0.00712327	348/51332/6696/119/6792/5865/83547/4747/65078/2039/23105/10512/80206/57704/2185/4131/1954/4137/118/10439/2241/6712/57556/29767/8799/1173/11344/57698/10096/23580/91663/5581/2664/2932/5728/80031/5058/11078/23038/57175/3984/25/10458/10565/1982/4703/65267/659/4641/2475/1182/2055/6709/10509/5048/23011/1020/9798/5217/8195/8766/57609/23647/2059/150465/10505/23406/54434/88/10723/23616/1207/7408/10371/128…	126
501Mel	GO:2000058	regulation of ubiquitin-dependent protein catabolic process	61/4741	164/18723	0.000487658	0.00860476	0.00720389	144165/10444/9604/22933/2185/84074/255488/11337/23376/54467/3300/10273/120892/2932/5728/51684/28951/79699/28952/11236/28996/1453/55743/10755/6815/5663/5601/55070/29978/7917/369/57154/25831/2729/5371/4193/2295/10221/55872/51377/11146/6613/7341/991/55294/6135/6201/4130/8312/6125/6386/5347/9349/1601/85409/4780/4092/57761/7480/1263/863	61
501Mel	GO:0009154	purine ribonucleotide catabolic process	21/4741	42/18723	0.000498008	0.00876271	0.00733612	5138/79873/128486/254552/283927/23417/38/215/131870/390916/5150/30833/8654/5142/11332/100/11163/4860/3251/5141/27115	21
501Mel	GO:0061572	actin filament bundle organization	60/4741	161/18723	0.000509523	0.00894019	0.00748472	22998/119/2039/2185/118/10391/6385/221692/64780/5358/57698/6548/6281/5058/7126/57175/3984/25/10458/4233/2475/9270/8500/7016/5217/8195/4771/2059/55160/10979/3925/7840/90102/5829/7043/4082/10395/85358/5216/7046/7168/408/3693/7184/5074/9124/50507/123016/5357/29109/6624/87/23075/55971/55607/4739/3397/3936/1902/56776	60
501Mel	GO:0050931	pigment cell differentiation	18/4741	34/18723	0.000514574	0.0090036	0.0075378	4948/10981/7306/5873/9839/4208/4435/5167/4286/2767/8907/79803/164/596/283652/55686/8975/84079	18
501Mel	GO:1902750	negative regulation of cell cycle G2/M phase transition	28/4741	62/18723	0.000538189	0.00939057	0.00786177	22809/1112/57099/55743/64859/84936/9344/65123/79035/672/80279/983/51720/8883/11073/472/63967/5347/1111/51514/990/4998/9212/90381/2273/54984/641/8091	28
501Mel	GO:0009165	nucleotide biosynthetic process	88/4741	254/18723	0.000541903	0.00942705	0.00789231	8034/23057/10861/9605/25874/64802/55902/65018/221264/10891/203/5313/5160/8604/5164/79993/1738/108/27231/7084/23417/32/5465/5165/38/1737/523/53354/79877/23475/226/79717/84277/55312/10201/50808/5162/79646/51000/112/83549/139596/204/9200/8050/5635/56848/158/1716/6240/1723/7040/7298/9519/60481/10135/6241/1841/1503/8833/11332/102157402/4830/5634/4833/471/353/1854/5471/100/5198/1836/83666/7378/10606/56…	88
501Mel	GO:0009081	branched-chain amino acid metabolic process	12/4741	19/18723	0.000546177	0.00942705	0.00789231	113675/36/4329/11112/27034/9673/38/593/10994/1892/549/3712	12
501Mel	GO:0098780	response to mitochondrial depolarisation	12/4741	19/18723	0.000546177	0.00942705	0.00789231	10133/65018/79594/10013/9927/8678/54832/22863/10075/2874/11140/3099	12
501Mel	GO:0035384	thioester biosynthetic process	22/4741	45/18723	0.000549309	0.00942705	0.00789231	25874/55902/5160/5164/79993/1738/23417/32/5165/38/1737/79717/5162/9200/8050/60481/2181/2180/5163/54898/5166/51703	22
501Mel	GO:0046189	phenol-containing compound biosynthetic process	22/4741	45/18723	0.000549309	0.00942705	0.00789231	7042/1638/4948/7306/7220/6490/1497/23657/1652/9839/1001/51151/4435/26002/10755/7299/2643/283652/9464/23596/4157/4929	22
501Mel	GO:0071616	acyl-CoA biosynthetic process	22/4741	45/18723	0.000549309	0.00942705	0.00789231	25874/55902/5160/5164/79993/1738/23417/32/5165/38/1737/79717/5162/9200/8050/60481/2181/2180/5163/54898/5166/51703	22
501Mel	GO:0051783	regulation of nuclear division	53/4741	139/18723	0.000562461	0.00962638	0.00805919	3479/11105/146691/22933/858/23363/9820/324/23113/10201/25906/56984/10403/9088/10419/55795/991/55055/9700/699/157313/79866/472/11130/5573/54908/9787/5347/10635/1111/4751/7175/1104/9319/1063/7272/55755/81620/891/26271/51203/27085/995/701/1843/4085/9212/9735/7517/9585/4288/2827/4041	53
501Mel	GO:0006473	protein acetylation	72/4741	201/18723	0.000577409	0.00985529	0.00825084	3662/10891/4137/26009/9027/27154/8648/26038/406/51105/2932/5447/55683/23326/93624/122830/8861/55929/8986/57326/51230/10626/9913/7917/6659/54556/57609/54386/9862/79903/56848/80314/23741/6883/23137/29117/151507/80018/55167/55257/672/6871/6418/11091/8607/51176/9767/84140/3066/675/25942/4297/85459/157570/54107/408/79612/1111/79075/8520/8089/55011/2308/7703/22976/79960/86/2648/55689/26471/9252/8850	72
501Mel	GO:0045005	DNA-dependent DNA replication maintenance of fidelity	23/4741	48/18723	0.000594918	0.0101265	0.00847792	55218/54465/9984/84083/10293/7486/675/5424/254394/253714/8914/1763/10189/55159/5111/55345/54962/4796/5888/146956/1663/641/5426	23
501Mel	GO:0034260	negative regulation of GTPase activity	19/4741	37/18723	0.000597786	0.0101478	0.00849571	9104/23677/11153/120892/10565/8195/402/65125/55920/5365/132864/153090/408/23076/123016/409/54828/10252/10253	19
501Mel	GO:1903052	positive regulation of proteolysis involved in cellular protein catabolic process	51/4741	133/18723	0.000607337	0.0102821	0.00860812	144165/9104/10444/9604/22933/2185/255488/11337/54467/3300/10273/120892/2932/5728/114881/28951/79699/28952/11236/1453/55743/5663/5601/55070/29978/7917/57154/91445/25831/2729/51136/4193/10221/6613/7341/8975/991/55294/153090/8312/5347/1601/85409/9532/4780/26471/84900/4092/57761/1263/863	51
501Mel	GO:0051962	positive regulation of nervous system development	93/4741	272/18723	0.000632055	0.0106717	0.00893431	443/1638/6792/4747/6092/158038/5362/4131/1954/4137/3398/23363/9820/23376/11344/5176/57698/6604/2664/22871/5058/22954/3984/10458/1982/659/26039/2475/10154/5970/5364/1523/5048/4976/23011/9798/4124/23767/8766/1605/5584/51188/2043/6498/29904/23013/51199/5365/3091/23499/27339/5583/7040/10419/51593/8867/6091/3066/259266/85358/9353/23654/869/7161/4067/1499/4673/84079/4825/2803/375790/9423/274/3556/10507…	93
501Mel	GO:0042770	signal transduction in response to DNA damage	63/4741	172/18723	0.000637496	0.0107058	0.0089629	10397/754/4646/26270/1112/842/7157/25/10116/28996/2074/6659/9344/1027/25946/5371/5514/4193/54465/9100/672/9984/27339/83695/80279/983/51720/144455/675/84444/83990/79621/11073/51065/472/79968/63967/200734/637/5347/8444/4869/1111/340485/51514/9656/6154/22976/5366/55159/161742/54962/2177/90381/7023/146956/11200/9521/641/1263/595/6615/8091	63
501Mel	GO:1990138	neuron projection extension	63/4741	172/18723	0.000637496	0.0107058	0.0089629	348/6792/65078/10512/3913/4131/1954/7414/4137/79594/10439/57556/9201/11344/57698/80208/2664/4692/2932/80031/5058/3984/25/1982/659/10509/5048/23011/1020/23767/8766/57154/57609/9043/150465/10505/10371/23499/6259/3688/25942/9353/8936/9962/3320/203228/114804/1499/223117/10501/1808/4825/2803/8851/9423/10507/6585/6405/57699/54910/56920/214/4133	63
501Mel	GO:0046488	phosphatidylinositol metabolic process	59/4741	159/18723	0.000640082	0.0107205	0.0089752	80235/9306/8503/5330/23167/5298/55650/54893/10903/3628/129303/54344/5728/4534/8835/9807/9600/5305/4952/79837/9926/22908/93210/8395/26751/5333/5296/9896/285172/51447/84720/23396/93183/5297/65258/145567/55697/22979/5283/8867/7179/3613/375133/253558/57605/5293/728233/5277/472/8526/146850/9487/80055/57217/8821/8871/9021/376497/22876	59
501Mel	GO:0009895	negative regulation of catabolic process	107/4741	320/18723	0.000650538	0.0108666	0.00909749	9104/83547/64802/65018/10891/22933/80772/8604/23077/84074/11178/8925/10140/23274/340371/113451/80317/32/5476/5465/302/9827/55625/7077/9682/120892/4534/8678/10869/7157/4233/9641/64784/51684/1982/2801/28996/79048/10755/2475/5970/6815/3162/5663/8724/493/11345/10533/26073/210/7917/596/29934/9638/4864/5371/4170/54971/9704/5768/55254/2043/2521/26986/341/1660/6625/55872/54888/81892/3192/80279/23400/5137…	107
501Mel	GO:0030010	establishment of cell polarity	54/4741	143/18723	0.000657624	0.0109557	0.00917213	51421/2185/4131/57698/399687/10090/2932/5058/3064/8729/10565/4649/10890/5048/23625/9638/22841/85440/23513/5584/10403/23616/9024/23150/10312/5310/3688/3993/3320/56288/10615/5754/54908/5347/55755/4478/1058/9265/154810/123016/4085/23189/284217/7465/9585/6624/10758/89958/2258/54828/4983/10252/3280/10253	54
501Mel	GO:0021543	pallium development	62/4741	169/18723	0.000667924	0.0110978	0.00929108	63827/4967/4747/10579/266727/83696/221692/8648/6867/27089/79633/166614/2932/5728/9289/5663/493/5048/1020/9638/8195/4771/5455/81853/153241/284403/23353/3091/1021/7515/6434/55236/51176/25987/85458/6091/259266/9353/153090/2044/10460/581/4830/471/22903/10642/1499/2146/9928/10501/89839/8851/84879/57178/317762/1745/3912/1746/7804/2258/5454/55970	62
501Mel	GO:0030177	positive regulation of Wnt signaling pathway	53/4741	140/18723	0.000685122	0.0113535	0.00950509	27123/54795/9679/84327/8658/406/65268/9839/1001/120892/147699/10927/63977/2262/25/81847/1453/3728/9101/53944/57326/6659/65125/6497/10413/55182/1455/23499/7040/8607/51176/85458/23500/259266/139285/8629/79809/5754/22881/79971/6206/55789/1601/54475/79718/130574/85407/23189/3087/7480/7015/7128/51339	53
501Mel	GO:0000076	DNA replication checkpoint signaling	11/4741	17/18723	0.000699284	0.0114969	0.00962518	8883/11073/63967/8914/1763/81620/990/4998/54962/90381/8318	11
501Mel	GO:0007076	mitotic chromosome condensation	11/4741	17/18723	0.000699284	0.0114969	0.00962518	29781/9918/148479/10592/23397/113130/5347/23310/64151/10051/51203	11
501Mel	GO:0034349	glial cell apoptotic process	11/4741	17/18723	0.000699284	0.0114969	0.00962518	842/7157/5578/1020/5584/5583/5580/637/7186/9590/27242	11
501Mel	GO:0010977	negative regulation of neuron projection development	52/4741	137/18723	0.000713395	0.0116982	0.00979369	348/6696/65078/23105/10512/3956/57556/2664/9139/22871/7431/120892/5728/80031/66008/5663/112/10509/5048/1020/57609/4193/10505/2288/1716/146760/2043/10371/6259/25987/1949/3066/7025/57187/5793/223117/10501/349667/8851/9423/23189/10507/26052/6405/2258/2045/4038/54910/56920/22876/4133/1902	52
501Mel	GO:0006893	Golgi to plasma membrane transport	27/4741	60/18723	0.000719376	0.0117348	0.00982437	10133/23233/4905/6844/582/288/55763/51125/8548/10564/90196/60412/28952/9581/9341/10890/149371/27032/54520/23499/403/26088/114879/29091/2803/2181/11031	27
501Mel	GO:0010972	negative regulation of G2/M transition of mitotic cell cycle	27/4741	60/18723	0.000719376	0.0117348	0.00982437	1112/57099/55743/64859/84936/9344/65123/79035/672/80279/983/51720/8883/11073/472/63967/5347/1111/51514/990/4998/9212/90381/2273/54984/641/8091	27
501Mel	GO:0048041	focal adhesion assembly	36/4741	87/18723	0.000741442	0.0120556	0.0100929	22998/2039/1845/2185/7414/10391/6385/2042/5170/8874/6548/6281/5728/56940/25/7205/8861/9270/26073/10420/596/9344/9748/10979/88/55920/90102/23499/23603/10395/1946/3673/5796/347/87/54828	36
501Mel	GO:0006284	base-excision repair	21/4741	43/18723	0.000742889	0.0120556	0.0100929	2074/10075/23201/5423/6188/6117/10038/7515/2237/8930/7486/5424/10721/55247/1763/6119/5111/3978/3146/5426/8091	21
501Mel	GO:0008589	regulation of smoothened signaling pathway	34/4741	81/18723	0.000757842	0.0122665	0.0102695	80274/1954/5566/283219/3340/5447/64839/2619/2121/5567/23295/5167/51684/55717/79770/7289/8945/26160/26091/64927/1495/55764/51377/80199/23322/79809/2622/27148/23432/92344/22856/7545/5727/860	34
501Mel	GO:0016331	morphogenesis of embryonic epithelium	55/4741	147/18723	0.000762955	0.0123174	0.0103121	7042/144165/3911/7020/23242/6385/4524/10370/5566/7189/5898/7798/7849/5567/25/8915/51684/7289/3714/4976/57534/6659/25831/1857/26160/6497/23513/55764/6789/55081/7408/3091/11146/7040/6491/80199/25902/10395/84678/6495/6201/5216/23654/5754/51804/1499/2535/2648/79191/5727/9585/7424/30812/27443/54910	55
501Mel	GO:0016358	dendrite development	84/4741	243/18723	0.000771871	0.0124232	0.0104007	547/348/1501/6792/1141/54149/23105/23373/4131/23242/11178/221692/5592/23363/9201/9820/1139/22849/10013/9922/22871/120892/2932/5728/54664/64689/66008/4208/26037/10458/1982/26039/57498/2475/5911/5663/23271/10160/1523/5048/4976/23011/1020/9344/7436/51188/2043/29904/10371/84062/10152/55236/5530/2534/3066/3688/991/85358/4130/153090/64284/23043/26115/473/22903/10642/55619/2146/84079/8851/23613/9423/848…	84
501Mel	GO:0000469	cleavage involved in rRNA processing	15/4741	27/18723	0.000773476	0.0124232	0.0104007	10607/28987/55720/6227/27340/79707/5394/23016/65095/23246/10171/55651/11340/23404/5393	15
501Mel	GO:0016049	cell growth	153/4741	482/18723	0.000781886	0.0125262	0.0104869	7042/348/6696/3479/6792/65078/23105/10512/56981/3913/2185/4131/1954/7414/4137/85004/23242/79594/10439/1410/3373/23677/57556/9201/9472/11344/57698/80208/5465/5607/3300/2664/4692/400410/10013/6548/84162/57446/2932/80031/4722/7048/8835/5058/7157/6494/29948/22954/6595/3984/25/5167/1982/10201/3275/659/2475/817/5518/10509/5048/51447/23011/1020/9798/596/23767/55004/8766/57154/57609/9344/7251/1027/1031/9…	153
501Mel	GO:0042063	gliogenesis	101/4741	301/18723	0.00079278	0.0126461	0.0105873	7042/443/8506/92737/5354/745/128853/80045/3913/22933/2185/4137/3398/10397/79885/23376/3459/1267/2896/2950/4720/9682/4692/7431/5728/9289/25/20/2817/2475/5970/5663/5048/1020/5453/5339/9572/4771/6659/1605/1031/6497/23513/5584/2043/23353/9580/1021/6426/57211/27339/5583/7040/10419/8867/51176/983/23500/3949/3066/11076/10319/79809/4665/153090/56288/3766/7161/11221/4919/3074/4067/1499/177/5028/2146/85414…	101
501Mel	GO:0032402	melanosome transport	13/4741	22/18723	0.00079341	0.0126461	0.0105873	129880/5873/4644/79083/1001/9230/4935/5861/10540/8195/8766/55686/64284	13
501Mel	GO:0010821	regulation of mitochondrion organization	54/4741	144/18723	0.000796439	0.0126622	0.0106007	3479/5138/65018/10891/10493/55187/4000/291/4137/79594/27069/578/10449/125170/10013/10105/6773/120892/2932/284114/54832/7157/5898/400916/54471/3064/292/8739/6721/598/4976/65084/57143/26355/10075/55737/2729/192111/64112/3091/1723/7855/23400/55294/64423/9141/581/57539/90427/637/201164/5366/8398/409	54
501Mel	GO:0006195	purine nucleotide catabolic process	22/4741	46/18723	0.000803144	0.0126723	0.0106092	5138/79873/128486/254552/283927/23417/38/215/131870/390916/5150/10591/30833/8654/5142/11332/100/11163/4860/3251/5141/27115	22
501Mel	GO:0007019	microtubule depolymerization	22/4741	46/18723	0.000803144	0.0126723	0.0106092	344148/4131/89795/10013/324/57701/23271/146057/3925/3796/347240/79929/126731/9181/10300/4130/22974/11004/81930/146909/50861/2258	22
501Mel	GO:0044818	mitotic G2/M transition checkpoint	22/4741	46/18723	0.000803144	0.0126723	0.0106092	1112/55743/64859/9344/65123/79035/672/80279/983/51720/8883/11073/472/63967/5347/1111/51514/990/4998/90381/641/8091	22
501Mel	GO:0043161	proteasome-mediated ubiquitin-dependent protein catabolic process	133/4741	412/18723	0.000805481	0.0126772	0.0106134	144165/342897/10444/26232/9604/22933/92305/23510/255488/11337/93611/23376/54467/23053/406/79089/10513/3300/26270/57414/6468/23304/10273/120892/2932/64839/4189/51185/10869/6047/7126/23008/80344/26234/122416/28951/79654/79699/7328/23321/10116/25827/201595/149603/55666/11059/1453/64777/130507/7466/55743/10755/55284/27252/9870/51439/202052/6815/5663/339745/5601/55070/81545/29978/26046/130617/26235/79…	133
501Mel	GO:1905508	protein localization to microtubule organizing center	18/4741	35/18723	0.000810222	0.0127199	0.0106491	2932/324/1453/10540/636/23386/49856/11190/9857/9851/6491/51134/10615/10464/22994/29887/64770/55722	18
501Mel	GO:1905477	positive regulation of protein localization to membrane	42/4741	106/18723	0.000823827	0.0129011	0.0108008	3745/54550/6769/288/2042/3675/5170/125170/163/5581/245812/11261/57214/5058/54471/391/65267/25921/4641/493/9270/1020/8766/27032/22841/5584/54434/5583/5621/2534/3688/9495/9141/85409/3958/2040/975/8851/2181/5357/4038/1969	42
501Mel	GO:0001701	in utero embryonic development	120/4741	367/18723	0.000834562	0.0130367	0.0109143	3479/201895/2034/338596/25809/2021/149473/788/56957/6926/8648/100381270/2821/10370/55224/7189/79798/1376/4010/9927/83605/7048/7157/5723/4695/9632/23038/4435/7779/284723/2296/57498/6830/9997/824/3714/598/7026/4124/57534/25831/23414/10454/5423/10413/9541/6789/6498/11232/54888/3091/80312/79728/7855/6491/2627/51176/7043/144455/5310/675/10436/23322/3688/3276/203286/25942/79621/6241/9654/84296/55636/54…	120
501Mel	GO:0051168	nuclear export	57/4741	154/18723	0.000840143	0.0130912	0.0109599	10768/9883/5566/80824/2932/6310/11261/127933/51277/23293/6830/6815/1020/57154/100101267/4193/6059/1660/54888/5433/9984/6209/5901/10204/23279/6428/7040/51496/84324/10212/55795/5310/84946/55153/9631/57187/4869/126549/79902/64901/7175/84321/3181/57122/26019/29107/1434/10189/6934/4927/3178/6741/580/7295/10892/3087/1959	57
501Mel	GO:0097193	intrinsic apoptotic signaling pathway	97/4741	288/18723	0.000865736	0.0134474	0.0112581	5625/84216/65018/6648/487/5164/79094/3717/29965/578/9131/754/10105/9479/120892/10488/4722/8678/842/23368/7157/7417/5770/22954/25/9641/28996/7466/51741/3162/2074/5598/598/4976/7917/3315/596/1540/25946/5371/51079/5423/4170/83787/4193/3622/51060/317/219790/6188/3428/6498/9024/64112/672/3091/675/55294/6135/6201/9181/153090/1649/5580/51065/472/6421/581/7161/637/10514/9833/7186/63979/30001/4824/1870/61…	97
501Mel	GO:1904951	positive regulation of establishment of protein localization	106/4741	319/18723	0.000878039	0.0134474	0.0112581	7042/18/3745/3479/11156/2696/22885/25874/65018/54795/5213/10391/6844/3717/288/55763/2752/57506/10497/399687/5566/5208/125170/5581/51100/999/2932/11261/57214/5058/101/7376/55823/54471/29085/55929/4641/5296/3728/5007/5663/9270/6721/4947/1020/51160/10075/6659/27032/7251/8660/4628/55072/4193/10576/54741/8754/5116/153241/79752/3091/5901/10204/7855/5621/23400/26229/7040/51496/1894/983/7043/2534/55294/9…	106
501Mel	GO:0002070	epithelial cell maturation	10/4741	15/18723	0.000882323	0.0134474	0.0112581	10481/137964/10116/3202/84283/231/3091/7298/4825/5991	10
501Mel	GO:0006089	lactate metabolic process	10/4741	15/18723	0.000882323	0.0134474	0.0112581	197257/8604/25953/5208/7157/3029/57380/3091/8864/3939	10
501Mel	GO:0009083	branched-chain amino acid catabolic process	10/4741	15/18723	0.000882323	0.0134474	0.0112581	36/4329/11112/27034/9673/38/593/1892/549/3712	10
501Mel	GO:0045475	locomotor rhythm	10/4741	15/18723	0.000882323	0.0134474	0.0112581	148523/4987/3398/5728/4669/10499/2475/9112/463/1958	10
501Mel	GO:0070885	negative regulation of calcineurin-NFAT signaling cascade	10/4741	15/18723	0.000882323	0.0134474	0.0112581	9454/2932/11261/2475/493/5598/5621/8445/51778/1827	10
501Mel	GO:0106057	negative regulation of calcineurin-mediated signaling	10/4741	15/18723	0.000882323	0.0134474	0.0112581	9454/2932/11261/2475/493/5598/5621/8445/51778/1827	10
501Mel	GO:1904424	regulation of GTP binding	10/4741	15/18723	0.000882323	0.0134474	0.0112581	5909/8874/4233/57326/26073/1203/2043/3925/9236/203228	10
501Mel	GO:0060560	developmental growth involved in morphogenesis	81/4741	234/18723	0.000904546	0.0137526	0.0115137	348/6696/6792/65078/23105/10512/3913/4131/1954/7414/4137/23242/79594/10439/57556/9201/11344/57698/80208/2664/4692/10013/2932/80031/7048/5058/3984/25/1982/659/10509/5048/23011/1020/9798/23767/8766/57154/57609/9043/150465/10413/10505/51199/10371/23499/6259/3688/25942/9353/6495/8936/9962/3320/203228/5754/51804/114804/1499/3975/223117/10501/1808/4825/2803/8851/9423/85407/10507/6585/6405/23566/2258/20…	81
501Mel	GO:2001234	negative regulation of apoptotic signaling pathway	78/4741	224/18723	0.000916589	0.013902	0.0116387	3479/56917/65018/6648/7001/4000/8837/27069/8737/754/5607/10449/2950/10105/9479/120892/2932/10488/4722/7417/5770/22954/3064/292/7466/5970/3162/5663/4150/5598/598/4976/3315/596/79886/10771/2729/25946/51079/4170/10413/83787/4193/3622/1495/51060/219790/8682/26574/672/3091/2534/9181/581/3655/637/7046/63979/1499/55011/3958/7703/54475/6934/4780/3070/3148/10625/220042/409/8531/2138/4929/3383/85450/7015/7…	78
501Mel	GO:0042147	retrograde transport, endosome to Golgi	37/4741	91/18723	0.000934207	0.014135	0.0118338	10079/58533/51272/51479/9827/55111/25938/120892/54497/8729/9779/1213/55275/9581/9341/22836/8724/5870/9527/6811/79735/29934/1203/23085/55737/112936/9043/7879/143187/51560/9648/55658/10228/26088/27147/27131/30845	37
501Mel	GO:0009314	response to radiation	145/4741	456/18723	0.000974841	0.0147142	0.0123187	1638/150094/1141/6609/10347/23373/6648/4308/23621/2868/1410/3373/3398/1497/92840/578/23657/2235/400410/79840/8372/64839/842/7157/143570/9600/22954/847/84236/375757/9187/9397/1408/2072/2767/8863/90313/2475/64859/5970/2074/210/598/1020/7439/596/54850/5609/7299/5371/65123/3157/5423/8450/9094/10413/4193/11190/1936/3428/79035/388/2547/1643/6240/4867/55872/672/3091/9112/83695/84083/221927/2237/1894/101…	145
501Mel	GO:1904356	regulation of telomere maintenance via telomere lengthening	27/4741	61/18723	0.000982509	0.0147943	0.0123858	79618/8658/2072/26277/23293/5609/10576/8550/7013/65057/3192/92345/80169/3183/5394/167227/10694/472/4751/3181/1499/3178/140609/1736/9212/54984/80119	27
501Mel	GO:0001558	regulation of cell growth	133/4741	414/18723	0.000995181	0.0149492	0.0125154	7042/348/6696/3479/6792/65078/23105/10512/56981/2185/4131/1954/4137/85004/79594/10439/1410/3373/23677/57556/9472/11344/57698/5465/5607/3300/2664/400410/6548/84162/57446/2932/80031/4722/8835/5058/7157/6494/29948/22954/6595/3984/25/5167/1982/10201/659/2475/817/5518/10509/5048/51447/23011/1020/9798/596/55004/8766/57154/57609/9344/7251/1027/1031/9043/5371/56848/51079/10298/28956/150465/10505/10718/23…	133
501Mel	GO:0043547	positive regulation of GTPase activity	87/4741	255/18723	0.00099782	0.014953	0.0125186	9104/6792/115704/65078/29/2185/858/9910/5909/2889/9827/6000/8874/9922/6281/57186/2932/125058/6494/26037/2775/391/9779/163486/54662/10999/23102/93627/57148/4649/5364/54885/26073/253959/23637/79735/85360/4943/22930/1857/22841/85440/23348/10979/23513/2043/55920/6001/23616/9824/55854/10982/5910/8412/139818/1894/64786/23603/2149/83478/3688/26084/3655/55357/958/55619/8502/2146/8853/11138/23108/9882/112…	87
501Mel	GO:0006606	protein import into nucleus	57/4741	155/18723	0.00100561	0.0149711	0.0125338	144165/9670/4000/9679/3717/9883/57506/754/999/120892/11261/7157/51684/1408/55929/11142/5296/5569/3728/5663/100101267/5371/5514/51569/1871/10527/5901/10204/10762/7040/3838/5530/1894/983/7341/3621/868/51194/9631/5580/9349/55374/79902/64901/53371/7175/57122/29107/1434/4927/3843/7545/129401/9221/347/10628/10758	57
501Mel	GO:1902117	positive regulation of organelle assembly	29/4741	67/18723	0.00100589	0.0149711	0.0125338	6385/90678/51100/8678/5305/79837/3064/5601/9525/1778/22930/49856/9738/153241/255967/80199/85459/10615/6386/9662/9908/10733/4478/10146/55835/6624/55329/9696/3936	29
501Mel	GO:0051298	centrosome duplication	31/4741	73/18723	0.00100859	0.0149711	0.0125338	9525/27243/10403/9738/153241/284403/672/7840/9851/6491/22995/79959/91147/282809/26973/284001/675/85459/152185/22994/9662/4869/163786/55755/899/10733/2648/7517/55835/55722/8850	31
501Mel	GO:0051865	protein autoubiquitination	31/4741	73/18723	0.00100859	0.0149711	0.0125338	55128/90678/7189/10273/120892/26994/50862/6047/27246/81847/149603/26046/23328/91445/25831/84851/51136/4193/55182/115426/90025/1643/672/9112/151636/56852/7186/114804/51666/29128/29089	31
501Mel	GO:0031330	negative regulation of cellular catabolic process	89/4741	262/18723	0.00102512	0.0151805	0.0127091	9104/64802/65018/22933/80772/84074/11178/8925/10140/23274/340371/80317/32/5476/302/9827/7077/9682/120892/4534/8678/10869/7157/4233/9641/51684/1982/2801/28996/79048/10755/2475/6815/3162/5663/493/11345/10533/26073/210/7917/596/9638/4864/5371/4170/9704/5768/55254/2043/2521/26986/341/1660/6625/55872/54888/81892/3192/80279/23400/51377/92345/10135/55353/10492/3183/8148/6135/6201/4130/153090/6125/6386/3…	89
501Mel	GO:0030318	melanocyte differentiation	14/4741	25/18723	0.00104191	0.0153565	0.0128564	4948/7306/5873/9839/4208/4435/5167/4286/2767/79803/596/283652/55686/8975	14
501Mel	GO:0032400	melanosome localization	14/4741	25/18723	0.00104191	0.0153565	0.0128564	129880/5873/4644/79083/1001/9230/4935/5861/26276/10540/8195/8766/55686/64284	14
501Mel	GO:0018205	peptidyl-lysine modification	122/4741	376/18723	0.00104724	0.0153988	0.0128918	23551/11105/3662/10891/4000/22933/54795/26009/9027/79594/54472/27154/8648/26038/23409/9682/51105/10013/5352/5447/23408/54790/55683/23326/93624/8861/55929/64324/63894/8986/6830/5970/26276/57326/51230/57337/10626/9913/83852/7917/80854/825/4706/6659/54556/57609/9070/9862/5371/79903/56848/80314/9189/23741/6883/4193/10054/23137/29117/84661/115426/151507/9739/64135/6804/55167/55257/672/6871/6418/1725/7…	122
501Mel	GO:0010001	glial cell differentiation	78/4741	225/18723	0.00106	0.0155499	0.0130184	443/8506/92737/5354/745/128853/80045/3913/22933/4137/3398/10397/79885/3459/1267/2896/2950/9682/7431/5728/25/20/2817/2475/5970/5663/1020/5453/5339/9572/6659/1605/1031/6497/2043/9580/1021/6426/57211/27339/7040/10419/51176/983/23500/3949/3066/11076/10319/79809/4665/56288/3766/7161/11221/4919/4067/1499/177/85414/4825/10675/27242/274/9331/1745/10215/2065/1746/7099/79628/30812/5454/375387/5803/6285/195…	78
501Mel	GO:0018209	peptidyl-serine modification	111/4741	338/18723	0.00107719	0.0157653	0.0131987	57452/375449/202374/146664/2039/65018/26524/2591/8737/578/9201/8658/5566/5170/5165/5581/10013/282974/7786/23012/166614/120892/2932/5728/7048/10114/5058/5578/57172/127933/9641/22983/28996/1453/64324/8986/2475/8569/5579/493/5601/817/53944/1389/5598/146057/1020/596/5217/11329/369/51231/65125/54386/79109/85440/51701/29110/5584/6789/154043/10038/388228/8550/9024/1455/1195/9874/5583/8412/7040/84930/983…	111
501Mel	GO:0009126	purine nucleoside monophosphate metabolic process	21/4741	44/18723	0.00108503	0.0158313	0.0132539	221264/203/260425/9414/50808/204/4354/158/1716/10591/30833/8833/471/353/5471/100/5198/10606/4860/3251/136332	21
501Mel	GO:1904925	positive regulation of autophagy of mitochondrion in response to mitochondrial depolarization	9/4741	13/18723	0.00108901	0.0158313	0.0132539	10133/65018/79594/10013/9927/54832/10075/11140/3099	9
501Mel	GO:0001881	receptor recycling	17/4741	33/18723	0.00109939	0.0158313	0.0132539	11149/10133/2060/4905/302/55111/125058/10564/9230/55614/9341/5663/55004/23513/30845/1889/22876	17
501Mel	GO:0009156	ribonucleoside monophosphate biosynthetic process	17/4741	33/18723	0.00109939	0.0158313	0.0132539	55312/83549/139596/158/1723/8833/5634/471/353/5471/100/5198/7378/10606/5631/7371/3251	17
501Mel	GO:0031116	positive regulation of microtubule polymerization	17/4741	33/18723	0.00109939	0.0158313	0.0132539	122060/4131/4137/89795/5058/4233/6249/402/1027/57606/6188/51199/403/10142/55755/8851/84722	17
501Mel	GO:0071539	protein localization to centrosome	17/4741	33/18723	0.00109939	0.0158313	0.0132539	2932/324/1453/10540/636/23386/11190/9857/9851/6491/51134/10615/10464/22994/29887/64770/55722	17
501Mel	GO:1900181	negative regulation of protein localization to nucleus	17/4741	33/18723	0.00109939	0.0158313	0.0132539	56957/26524/9201/9500/166614/2932/11261/51684/11142/5569/25885/51569/1495/9258/7341/25942/347	17
501Mel	GO:0071901	negative regulation of protein serine/threonine kinase activity	46/4741	120/18723	0.00110278	0.0158436	0.0132642	348/6609/26524/2950/9479/324/5728/10114/5770/25/11142/5569/1849/5576/7026/7016/11329/1027/5575/1031/10527/84062/80279/26973/153090/5580/5573/1030/5347/11221/4067/5997/3843/1843/7023/3087/1029/6546/5577/4041/8850/7128/10252/10019/10253/81848	46
501Mel	GO:0043473	pigmentation	39/4741	98/18723	0.00112547	0.0161325	0.0135061	1638/4948/129880/10981/7306/5873/4644/79083/6490/79090/9839/1001/51151/4208/4435/5167/9230/4935/4286/2767/8907/5861/9896/26276/79803/10540/164/596/8195/8766/7299/283652/84062/55686/8975/64284/581/84079/4157	39
501Mel	GO:0009261	ribonucleotide catabolic process	22/4741	47/18723	0.00115219	0.0164779	0.0137953	5138/79873/128486/254552/283927/23417/38/215/131870/390916/5150/30833/8654/5142/11332/100/11163/7378/4860/3251/5141/27115	22
501Mel	GO:0045444	fat cell differentiation	79/4741	229/18723	0.00115971	0.0165477	0.0138537	1734/6041/10891/4329/22933/54795/284207/168455/122953/283927/3398/25776/22809/406/83862/10013/22954/10124/5167/28951/7030/6272/27241/2475/9935/169200/28971/1389/9572/8195/51752/23414/25946/222236/2874/114885/10413/3638/10979/84159/6789/144404/9580/3192/7040/6495/1649/11221/182/115825/161882/8013/30001/5997/2308/8864/6934/1488/25819/51320/677/7538/123016/1051/2784/9314/57761/7480/4929/688/4041/308…	79
501Mel	GO:0051402	neuron apoptotic process	84/4741	246/18723	0.00117195	0.0166526	0.0139416	7042/348/3745/6620/4747/7020/64802/4835/65018/10891/6648/6812/23621/2185/2632/3717/58533/112399/340371/4296/2821/9131/5170/2896/842/7157/80315/101/4208/4435/80331/23321/8772/28996/7466/3162/5663/598/1020/596/26355/2729/5423/4170/5584/10280/3091/6418/5621/104/7043/2534/2149/54532/8883/55294/84678/6495/1649/5641/581/9759/637/408/51804/1499/9928/7301/4605/27242/8851/1051/26471/11113/409/1745/7516/20…	84
501Mel	GO:0009152	purine ribonucleotide biosynthetic process	61/4741	169/18723	0.00117238	0.0166526	0.0139416	8034/10861/9605/25874/55902/65018/221264/10891/203/5313/5160/8604/5164/79993/1738/108/23417/32/5465/5165/38/1737/523/53354/79877/226/79717/84277/10201/50808/5162/79646/51000/112/204/9200/8050/56848/158/1716/7040/60481/8833/11332/4830/4833/471/353/5471/5198/1836/10606/2181/2180/9060/5163/54898/3251/5166/109/51703	61
501Mel	GO:0051261	protein depolymerization	44/4741	114/18723	0.00118848	0.016805	0.0140691	51332/344148/119/2039/4131/118/89795/64780/6712/29767/11344/10013/324/11078/6709/57701/23271/9525/146057/2059/88/3925/23616/3796/347240/79929/6455/8867/126731/9181/10300/4130/22974/6840/11004/81930/120/146909/130271/50861/23075/2258/9645/10763	44
501Mel	GO:1901800	positive regulation of proteasomal protein catabolic process	44/4741	114/18723	0.00118848	0.016805	0.0140691	144165/10444/9604/22933/255488/11337/54467/3300/10273/120892/2932/114881/28951/79699/1453/55743/5663/5601/55070/29978/7917/91445/25831/2729/51136/4193/10221/6613/7341/8975/991/55294/153090/5347/1601/85409/9532/4780/26471/84900/4092/57761/1263/863	44
501Mel	GO:0000387	spliceosomal snRNP assembly	23/4741	50/18723	0.00120749	0.0170354	0.014262	7375/25980/8487/25929/9129/8161/1207/27339/10772/26121/10419/50628/6634/57819/6631/11218/6635/6633/6632/79833/6628/6637/6636	23
501Mel	GO:0033059	cellular pigmentation	24/4741	53/18723	0.00125159	0.017618	0.0147497	129880/10981/7306/5873/4644/79083/6490/79090/9839/1001/9230/4935/8907/5861/26276/10540/164/596/8195/8766/84062/55686/64284/84079	24
501Mel	GO:1901292	nucleoside phosphate catabolic process	34/4741	83/18723	0.00126559	0.0177751	0.0148813	5138/79873/128486/957/56953/254552/283927/23417/1267/38/215/5167/131870/200035/390916/5150/10591/30833/8930/8654/10924/5142/11164/11332/79077/1854/100/11163/7378/953/4860/3251/5141/27115	34
501Mel	GO:0032801	receptor catabolic process	15/4741	28/18723	0.00127808	0.0179103	0.0149945	348/823/302/51100/8678/5770/20/54894/55614/1020/57154/7040/151636/5641/5045	15
501Mel	GO:0051058	negative regulation of small GTPase mediated signal transduction	25/4741	56/18723	0.00128533	0.0179716	0.0150458	7042/3675/7077/9927/7126/4233/8216/79109/3925/23616/83478/3688/10395/9353/153090/23607/286205/94134/22821/23189/5922/50861/10252/10253/81848	25
501Mel	GO:0009132	nucleoside diphosphate metabolic process	47/4741	124/18723	0.00129495	0.0180658	0.0151247	80201/3479/4967/79873/55753/221264/10891/203/5313/957/5213/5236/283927/3098/2821/5465/5208/260425/9414/226/5214/10201/50808/11182/5663/5571/131870/204/4354/402/2584/83440/3091/11164/9759/1841/4830/4833/339123/3939/5027/26471/953/3099/136332/54541/863	47
501Mel	GO:0010822	positive regulation of mitochondrion organization	31/4741	74/18723	0.00131987	0.0183726	0.0153815	65018/10891/55187/291/79594/578/125170/10105/2932/7157/5898/400916/54471/3064/292/8739/4976/57143/26355/55737/192111/64112/3091/9141/581/57539/90427/637/201164/5366/8398	31
501Mel	GO:0032868	response to insulin	89/4741	264/18723	0.001333	0.0184815	0.0154727	2805/2549/8503/5313/23175/29988/64506/4644/5164/84327/6844/858/8837/2241/2101/5170/5465/55625/2950/64900/6548/2932/324/5728/54832/5058/3030/5770/23038/5305/847/2806/79837/10458/4435/5167/8615/1408/10999/6272/4641/5296/2475/5970/10890/5579/23235/57727/4976/139596/55667/3033/2729/8660/3638/5872/5584/3795/29904/8412/132864/25948/10014/5580/353/7351/4067/5471/2308/23371/27131/8836/9882/677/23189/9021…	89
501Mel	GO:0034599	cellular response to oxidative stress	96/4741	288/18723	0.0013336	0.0184815	0.0154727	5625/2034/221/2021/65018/10891/6648/7001/22933/4482/4137/140885/5164/2113/695/2241/3717/8737/23657/50640/406/9131/215/10013/10105/79956/120892/8678/7157/25824/25/84883/4233/83959/84181/5970/3162/5601/10533/5598/3315/596/9973/57332/59338/135112/79109/5371/4170/4193/55139/5052/6188/87178/388/10280/57465/2643/3091/5829/23400/1894/983/2534/132864/3066/2054/55294/25942/5580/1719/6421/7168/9833/8013/14…	96
501Mel	GO:0042752	regulation of circadian rhythm	46/4741	121/18723	0.00134857	0.0186067	0.0155775	5730/150094/6096/1141/10891/23373/4987/3398/406/5465/9500/22871/2932/64839/7157/1408/2767/8863/1453/2475/5601/10533/9572/8945/54850/5371/9112/6839/983/55294/25942/6421/3184/8914/463/7153/100/8864/79723/2146/23596/25819/8553/56938/7071/221391	46
501Mel	GO:0045931	positive regulation of mitotic cell cycle	46/4741	121/18723	0.00134857	0.0186067	0.0155775	1845/3373/6604/5578/23276/25/23326/9525/26073/5048/8766/5514/150465/4193/7027/994/5889/55920/983/284001/675/25942/8317/9700/113130/1977/11065/80174/5641/9787/8558/4824/51514/81620/891/990/26271/27085/995/993/9510/7480/1543/7015/595/3280	46
501Mel	GO:0031503	protein-containing complex localization	76/4741	220/18723	0.00136033	0.0187161	0.0156691	6616/10815/2060/6844/11020/1741/1173/55333/163/22871/7275/9371/23293/11336/6830/3800/11158/8766/55737/1605/26160/8417/23513/55764/55081/55920/6059/54888/5433/7013/332/9984/6209/5901/3192/23279/6428/80173/51668/84324/117178/10212/55795/84946/440145/79809/403/55153/9631/201134/472/57187/6421/22994/57539/10142/81929/4869/79902/7175/84321/3181/57122/26019/3092/10189/4927/6103/55706/6741/26052/4092/55…	76
501Mel	GO:0036297	interstrand cross-link repair	19/4741	39/18723	0.00136248	0.0187161	0.0156691	2072/64858/22909/9937/2189/84515/254394/165918/2187/10635/55120/55247/55159/2956/2178/2177/7517/5888/2175	19
501Mel	GO:0006103	2-oxoglutarate metabolic process	11/4741	18/18723	0.00138719	0.0189065	0.0158285	4967/2805/55753/137872/5264/1738/92259/1743/2806/3420/51166	11
501Mel	GO:0015936	coenzyme A metabolic process	11/4741	18/18723	0.00138719	0.0189065	0.0158285	8034/254552/283927/38/53354/54677/79877/79717/79646/390916/11332	11
501Mel	GO:0046112	nucleobase biosynthetic process	11/4741	18/18723	0.00138719	0.0189065	0.0158285	2475/1723/1503/6470/8833/353/5471/100/10606/5631/3251	11
501Mel	GO:0072522	purine-containing compound biosynthetic process	70/4741	200/18723	0.00139428	0.0189065	0.0158285	8034/10861/9605/25874/55902/65018/221264/10891/203/5313/5160/8604/5164/79993/1738/108/23417/32/5465/5165/38/1737/523/161823/53354/79877/226/79717/84277/10201/50808/5162/79646/51000/112/204/9200/8050/5635/56848/158/1716/7040/60481/262/6470/8833/11332/4830/5634/4833/471/353/5471/100/5198/1836/10606/4507/5631/2181/2180/9060/5163/4860/54898/3251/5166/109/51703	70
501Mel	GO:0007015	actin filament organization	140/4741	442/18723	0.00139814	0.0189065	0.0158285	51332/22998/119/10634/9886/2039/80206/57704/2185/118/23242/10391/4644/6385/84327/2241/3717/221692/57477/64780/6712/29767/5358/11344/57698/10096/23580/4646/91663/5581/6548/6281/4892/5058/226/11078/7126/57175/3984/25/10458/4233/391/10565/4703/4641/23164/2475/22836/6709/9270/8500/5339/596/7016/5217/8195/4771/11133/23647/2059/55160/63916/1495/1729/23406/7171/10979/5584/54434/88/3925/388/30011/23616/7…	140
501Mel	GO:0001919	regulation of receptor recycling	13/4741	23/18723	0.00140345	0.0189065	0.0158285	11149/10133/2060/4905/302/125058/55614/9341/5663/55004/23513/1889/22876	13
501Mel	GO:0032401	establishment of melanosome localization	13/4741	23/18723	0.00140345	0.0189065	0.0158285	129880/5873/4644/79083/1001/9230/4935/5861/10540/8195/8766/55686/64284	13
501Mel	GO:0051904	pigment granule transport	13/4741	23/18723	0.00140345	0.0189065	0.0158285	129880/5873/4644/79083/1001/9230/4935/5861/10540/8195/8766/55686/64284	13
501Mel	GO:0051101	regulation of DNA binding	45/4741	118/18723	0.0014035	0.0189065	0.0158285	3479/3662/22933/3717/8658/7189/808/2072/28996/64324/2296/3162/5663/22927/51042/6497/3428/65057/7040/51176/7341/3066/84444/55294/25942/1649/4830/4751/9464/1499/177/8864/55355/81620/7295/3148/3146/3673/7023/9314/54984/3397/23462/3280/8091	45
501Mel	GO:0008630	intrinsic apoptotic signaling pathway in response to DNA damage	39/4741	99/18723	0.00140938	0.018945	0.0158607	29965/578/842/7157/22954/25/9641/28996/3162/2074/598/7917/596/25946/5371/5423/4170/3622/6188/3428/6498/64112/672/675/51065/472/581/7161/637/6154/8445/2956/26471/11200/220042/64782/54541/1969/6615	39
501Mel	GO:0007034	vacuolar transport	57/4741	157/18723	0.00142529	0.0191178	0.0160054	51332/283537/83547/65018/8031/55187/138050/23274/57617/51479/9114/23339/2896/55681/411/120892/22879/4534/54664/8678/54832/66008/6845/55823/9765/23295/55275/9842/6272/3920/63894/219931/27072/757/9525/64400/164/51160/22863/4864/57154/55737/7251/8027/27243/7879/143187/54741/388/9648/8906/23400/151636/203228/114804/30845/274	57
501Mel	GO:0062197	cellular response to chemical stress	110/4741	337/18723	0.00142866	0.0191221	0.016009	4638/5625/2034/221/2021/65018/10891/5269/6648/7001/22933/4482/4137/140885/5164/2113/695/2241/3717/8737/79085/23657/50640/406/9131/215/10013/10105/79956/120892/8678/7157/25824/25/84883/4233/65267/83959/84181/5970/3162/5601/10533/5598/5339/3315/596/825/9973/57332/59338/135112/79109/5371/4170/4193/55139/5052/6188/87178/388/2547/231/10280/57465/2643/3091/5829/23400/1894/983/2534/132864/3066/2054/5529…	110
501Mel	GO:0000266	mitochondrial fission	20/4741	42/18723	0.001467	0.0195934	0.0164036	65018/10891/56181/4137/79594/125170/6773/120892/5898/51537/1352/54471/4976/65084/55737/91137/192111/1723/64423/113115	20
501Mel	GO:0051648	vesicle localization	63/4741	177/18723	0.00147017	0.0195939	0.016404	547/129880/5864/65018/23233/5873/4644/79083/79443/80208/4646/1780/22871/1001/120892/5728/1759/11261/66008/6845/22920/9371/3064/8729/60412/55717/9230/4935/8615/553115/9342/1453/4641/5861/23208/3800/5663/26276/9527/3985/10540/5048/1020/64149/7016/55062/8195/8766/1778/8773/23513/9024/84062/55686/81/8867/10312/27445/64284/26115/1499/10125/4133	63
501Mel	GO:0061136	regulation of proteasomal protein catabolic process	66/4741	187/18723	0.00147461	0.0196114	0.0164186	144165/348/65018/10444/9604/22933/255488/11337/23376/54467/5566/3300/10273/120892/2932/10869/114881/28951/79699/1453/55743/10755/6815/5663/5601/11345/55070/29978/210/7917/8945/7110/369/91445/25831/2729/51136/4193/2295/10221/55872/51377/11146/6613/7341/5310/8975/991/55294/6135/4130/153090/6386/5347/1601/85409/9532/4780/26471/84900/4092/57761/7480/1263/863/4983	66
501Mel	GO:0032984	protein-containing complex disassembly	77/4741	224/18723	0.00148539	0.0197128	0.0165036	51332/344148/119/2039/4131/4905/118/89795/79443/64780/6712/23274/29767/11344/6604/10013/8775/25851/2932/324/11078/57192/56648/84340/9342/3920/81631/6709/57701/23271/9525/256471/146057/9798/22863/57231/10241/4943/7251/2059/27243/55254/88/3925/6059/2935/79752/23616/3796/55014/347240/79929/6418/6455/8867/126731/9181/10300/4130/22974/6603/9349/8444/6840/11004/81930/120/146909/3159/130271/50861/23075/…	77
501Mel	GO:0001782	B cell homeostasis	16/4741	31/18723	0.00149365	0.0197695	0.016551	578/4208/6655/25/8915/596/3091/139818/581/4067/100/55619/10758/407975/7128/10673	16
501Mel	GO:0033108	mitochondrial respiratory chain complex assembly	37/4741	93/18723	0.00149597	0.0197695	0.016551	4702/25813/4719/4700/4711/55245/374291/7386/9131/4720/4698/4713/4722/4715/90624/4728/4695/4704/4708/4696/28958/79133/9997/285521/4707/4694/80224/4705/51204/4706/54949/55967/51079/84987/10063/55863/91942	37
501Mel	GO:0000082	G1/S transition of mitotic cell cycle	74/4741	214/18723	0.00151303	0.0199529	0.0167045	65061/23026/26524/3373/3398/10457/324/5728/7157/10263/5127/3275/1020/596/6659/1027/79027/1031/5371/8450/4193/7027/1871/81853/29117/6194/6502/58190/2935/57695/128239/1021/5129/5218/5530/144455/5310/3688/5933/8317/898/1977/51065/472/1030/5932/637/1033/1104/8558/5471/6154/2146/9928/990/79960/55159/4863/10926/27085/993/11200/9314/9510/4678/7465/2273/1029/5426/1263/1543/7015/595/51339	74
501Mel	GO:0048640	negative regulation of developmental growth	43/4741	112/18723	0.00151694	0.0199624	0.0167125	6696/65078/23105/10512/57556/10370/5465/5728/80031/7048/8835/5058/4211/10509/1020/57609/1027/9043/10505/6789/9686/10371/6259/5641/7161/11221/5997/3776/223117/10501/8851/9423/85407/10507/5727/6405/2258/2045/54910/56920/407975/4133/9518	43
501Mel	GO:0072594	establishment of protein localization to organelle	134/4741	422/18723	0.00157166	0.0206126	0.0172569	144165/83882/22885/65018/8031/9670/55187/4000/9679/4137/25813/3717/3098/4285/23409/90678/9883/57506/9131/754/51100/9927/999/120892/22879/10531/11261/54832/7157/5898/808/55823/9765/10440/5193/51684/9409/1408/55929/26521/6272/3920/11142/5296/83752/5569/10890/3728/5663/285521/6721/27072/26515/130617/5828/51160/10075/8766/57154/22930/100101267/26262/7251/8027/5190/5371/5514/51079/51569/7879/55072/105…	134
501Mel	GO:0051053	negative regulation of DNA metabolic process	47/4741	125/18723	0.00157293	0.0206126	0.0172569	9104/64802/10039/8658/84309/7157/78990/2072/26277/659/23293/2074/7644/4437/54386/9400/6188/7013/9984/65057/3192/84083/7515/55183/80169/3183/5394/4297/167227/23347/55010/472/10721/2187/126549/92797/3776/3178/2956/116028/1843/27000/79000/54984/641/80119/8091	47
501Mel	GO:0030100	regulation of endocytosis	73/4741	211/18723	0.00159571	0.0208674	0.0174702	348/54550/114781/6609/10347/5869/11037/90678/2042/22848/1173/51479/302/30844/55681/163/192683/10825/22871/120892/1759/5770/808/7376/9765/25/20/9779/23208/160/29978/10188/26119/23011/636/51160/55589/57534/29934/84896/7251/5867/5878/257364/9094/55738/23513/341/29904/6455/5530/8867/124930/64284/6386/338692/23607/408/1601/8527/3092/3958/79772/29763/84058/274/3673/409/11031/154664/4983/933/85439	73
501Mel	GO:0051650	establishment of vesicle localization	58/4741	161/18723	0.00160636	0.020963	0.0175502	547/129880/5864/65018/23233/5873/4644/79083/79443/80208/4646/1780/22871/1001/120892/1759/11261/66008/6845/22920/9371/3064/8729/60412/55717/9230/4935/553115/9342/1453/4641/5861/23208/3800/5663/9527/3985/10540/5048/1020/64149/7016/55062/8195/8766/1778/8773/23513/84062/55686/81/8867/10312/64284/26115/1499/10125/4133	58
501Mel	GO:0050821	protein stabilization	67/4741	191/18723	0.00163125	0.0212382	0.0177806	3479/65018/10891/6812/55742/573/84327/79594/1410/481/22848/51125/2896/5728/11261/10869/7157/55664/3920/8863/287/7466/1389/23011/7917/5217/23673/6659/1857/6400/5190/51701/84897/10576/6789/11140/2043/902/23560/1022/10728/7341/8975/23162/55294/6135/6201/5216/3320/10694/84515/5580/9894/6125/23252/483/9349/79612/4869/3092/9532/482/9770/11200/4092/7480/10437	67
501Mel	GO:0009185	ribonucleoside diphosphate metabolic process	41/4741	106/18723	0.00163423	0.0212382	0.0177806	80201/3479/4967/79873/55753/221264/10891/203/5313/957/5213/5236/3098/2821/5465/5208/260425/9414/226/5214/50808/11182/5663/5571/131870/204/4354/402/2584/83440/3091/11164/9759/339123/3939/5027/26471/3099/136332/54541/863	41
501Mel	GO:1901215	negative regulation of neuron death	72/4741	208/18723	0.00168291	0.0217973	0.0182487	348/6620/4747/64802/65018/10891/6648/6812/2185/2632/84280/3717/58533/340371/23657/2821/5176/5170/5465/2896/163/10457/120892/2932/80315/101/4208/4435/80331/28996/7466/3162/5663/10533/598/1020/596/55737/2729/135112/5584/10038/3091/6418/23400/7043/2534/2149/84678/6495/3134/9962/29937/5641/581/7186/408/8013/51804/1499/9928/7301/1051/409/1745/7516/2065/4929/2690/7015/10763/5803	72
501Mel	GO:0051973	positive regulation of telomerase activity	17/4741	34/18723	0.00168421	0.0217973	0.0182487	79618/8658/5609/10576/8550/4931/65057/92345/10728/3320/4751/1499/140609/1736/9212/9314/4609	17
501Mel	GO:0009135	purine nucleoside diphosphate metabolic process	40/4741	103/18723	0.00169386	0.0218319	0.0182777	80201/3479/4967/79873/55753/221264/10891/203/5313/957/5213/5236/3098/2821/5465/5208/260425/9414/226/5214/50808/11182/5663/5571/131870/204/4354/402/2584/83440/3091/9759/339123/3939/5027/26471/3099/136332/54541/863	40
501Mel	GO:0009179	purine ribonucleoside diphosphate metabolic process	40/4741	103/18723	0.00169386	0.0218319	0.0182777	80201/3479/4967/79873/55753/221264/10891/203/5313/957/5213/5236/3098/2821/5465/5208/260425/9414/226/5214/50808/11182/5663/5571/131870/204/4354/402/2584/83440/3091/9759/339123/3939/5027/26471/3099/136332/54541/863	40
501Mel	GO:0051875	pigment granule localization	14/4741	26/18723	0.00173441	0.0223088	0.0186769	129880/5873/4644/79083/1001/9230/4935/5861/26276/10540/8195/8766/55686/64284	14
501Mel	GO:0006611	protein export from nucleus	25/4741	57/18723	0.00174523	0.0223105	0.0186783	10768/5566/80824/2932/11261/127933/51277/6815/1020/57154/4193/5901/10204/7040/51496/5310/126549/64901/7175/29107/1434/6934/580/7295/1959	25
501Mel	GO:0010257	NADH dehydrogenase complex assembly	25/4741	57/18723	0.00174523	0.0223105	0.0186783	4702/4719/4700/4711/374291/4720/4698/4713/4722/4715/4728/4695/4704/4708/4696/79133/4707/4694/80224/4705/4706/55967/51079/55863/91942	25
501Mel	GO:0032981	mitochondrial respiratory chain complex I assembly	25/4741	57/18723	0.00174523	0.0223105	0.0186783	4702/4719/4700/4711/374291/4720/4698/4713/4722/4715/4728/4695/4704/4708/4696/79133/4707/4694/80224/4705/4706/55967/51079/55863/91942	25
501Mel	GO:0070059	intrinsic apoptotic signaling pathway in response to endoplasmic reticulum stress	27/4741	63/18723	0.00176646	0.0225359	0.018867	84216/487/79094/578/9131/120892/10488/7157/5770/7466/598/4976/7917/596/5371/51060/9024/153090/1649/581/7186/30001/23645/837/5366/1051/57761	27
501Mel	GO:0007568	aging	110/4741	339/18723	0.00178547	0.0227321	0.0190313	18/9104/2021/10891/6648/4000/1410/6926/3398/1738/578/80317/10370/5176/406/4215/7077/1267/120892/5728/7048/10229/8678/842/7157/847/25/2775/2475/5970/2055/5663/5601/10533/4976/596/5609/2729/1027/1515/1605/222236/5371/5423/3622/1495/317/5606/4791/23137/87178/2879/8550/6185/1021/5621/7298/4521/5530/10135/983/7043/10783/80169/26156/7486/675/5933/25942/83719/5580/472/10000/1030/1788/4869/1111/7351/3000…	110
501Mel	GO:1905475	regulation of protein localization to membrane	62/4741	175/18723	0.00181271	0.0229754	0.0192349	3745/54550/2039/6769/288/2042/3675/23657/1173/5170/55625/125170/163/5581/2664/9528/245812/11261/57214/5058/2262/54471/391/1213/65267/2817/25921/4641/493/9270/26119/598/1020/8500/8766/27032/25831/1605/22841/8417/5584/54434/54585/5583/5621/7040/2534/3688/9495/9141/1601/85409/3958/2040/221914/975/8851/23613/2181/5357/4038/1969	62
501Mel	GO:0090231	regulation of spindle checkpoint	10/4741	16/18723	0.00181925	0.0229754	0.0192349	25906/10403/55795/7175/55755/81620/891/1843/4085/7517	10
501Mel	GO:0090266	regulation of mitotic cell cycle spindle assembly checkpoint	10/4741	16/18723	0.00181925	0.0229754	0.0192349	25906/10403/55795/7175/55755/81620/891/1843/4085/7517	10
501Mel	GO:1903504	regulation of mitotic spindle checkpoint	10/4741	16/18723	0.00181925	0.0229754	0.0192349	25906/10403/55795/7175/55755/81620/891/1843/4085/7517	10
501Mel	GO:0006904	vesicle docking involved in exocytosis	18/4741	37/18723	0.00184804	0.0231522	0.019383	6616/3745/5865/5864/115827/6812/57617/54843/10497/9751/55823/60412/9341/10890/5872/6804/10244/1488	18
501Mel	GO:0031112	positive regulation of microtubule polymerization or depolymerization	18/4741	37/18723	0.00184804	0.0231522	0.019383	122060/4131/4137/89795/5058/4233/6249/402/1027/57606/6188/51199/10300/403/10142/55755/8851/84722	18
501Mel	GO:0048846	axon extension involved in axon guidance	18/4741	37/18723	0.00184804	0.0231522	0.019383	10512/1954/57556/80031/659/10509/10505/10371/6259/9353/223117/10501/10507/6585/6405/54910/56920/214	18
501Mel	GO:1902284	neuron projection extension involved in neuron projection guidance	18/4741	37/18723	0.00184804	0.0231522	0.019383	10512/1954/57556/80031/659/10509/10505/10371/6259/9353/223117/10501/10507/6585/6405/54910/56920/214	18
501Mel	GO:0001649	osteoblast differentiation	78/4741	229/18723	0.0018538	0.023178	0.0194046	58476/6696/3479/6096/537/54795/1291/8994/10140/2101/23376/5566/23051/10457/4208/847/4435/51684/1213/659/6238/51741/3295/169200/27044/23020/103/6497/10413/7171/10979/9188/2194/1660/6209/1021/3192/23560/1192/27316/93/51176/10492/10312/3183/26156/865/9260/9759/10514/63979/182/658/22800/3726/9464/1499/23314/10189/26271/2091/3399/25819/9770/1051/10507/5727/91355/7480/7424/4041/3199/30812/860/654/3570/…	78
501Mel	GO:0014037	Schwann cell differentiation	19/4741	40/18723	0.00198515	0.0247709	0.0207382	8506/3913/22933/10397/2817/5970/1020/5453/5339/1605/6497/57211/983/4665/56288/2065/79628/5454/1959	19
501Mel	GO:0043624	cellular protein complex disassembly	50/4741	136/18723	0.00199121	0.0247971	0.0207601	51332/344148/119/2039/4131/4905/118/89795/64780/6712/29767/11344/10013/8775/324/11078/56648/84340/6709/57701/23271/9525/146057/2059/88/3925/6059/2935/23616/3796/347240/79929/6455/8867/126731/9181/10300/4130/22974/6840/11004/81930/120/146909/130271/50861/23075/2258/9645/10763	50
501Mel	GO:2000060	positive regulation of ubiquitin-dependent protein catabolic process	41/4741	107/18723	0.00201056	0.0249884	0.0209203	144165/10444/9604/22933/2185/255488/11337/54467/3300/10273/120892/2932/5728/28951/79699/28952/11236/1453/55743/5663/5601/55070/29978/57154/25831/2729/4193/10221/6613/7341/991/55294/8312/5347/1601/85409/4780/4092/57761/1263/863	41
501Mel	GO:0044774	mitotic DNA integrity checkpoint signaling	34/4741	85/18723	0.00204677	0.0253528	0.0212253	1112/7157/6659/9344/1027/5371/5514/4193/672/80279/983/51720/8883/11073/51065/472/63967/5347/1111/51514/9656/6154/990/55159/4998/54962/2177/90381/146956/11200/641/1263/595/8091	34
501Mel	GO:0017038	protein import	71/4741	206/18723	0.00204798	0.0253528	0.0212253	144165/348/9670/4000/9679/25813/3717/9883/57506/9131/754/999/120892/11261/7157/10440/5193/51684/9409/1408/55929/3920/11142/5296/83752/5569/3728/5663/5828/100101267/5190/5371/5514/51569/257364/1871/10527/5901/10204/10762/7040/3838/5530/1894/983/7341/3621/868/51194/9141/3320/9631/5580/134266/9349/55374/79902/64901/53371/7175/57122/29107/1434/4927/3843/7545/129401/9221/347/10628/10758	71
501Mel	GO:0031032	actomyosin structure organization	68/4741	196/18723	0.0020821	0.0256738	0.021494	22998/10324/80206/2185/10391/6385/9172/8837/221692/541468/23363/29767/399687/6548/6281/4892/5058/7126/3984/25/4233/4703/2475/8476/9270/8500/5339/7016/5217/825/8195/4771/55160/4628/29127/10979/23136/88/3925/7840/90102/5829/122786/1894/7043/3688/10395/5216/5573/7046/7168/408/51804/3693/9124/50507/123016/2037/11113/51778/4621/29109/84978/91807/11155/1266/55607/1902	68
501Mel	GO:0045664	regulation of neuron differentiation	68/4741	196/18723	0.0020821	0.0256738	0.021494	54845/85446/124936/4131/3232/9745/3398/5909/8648/7077/22882/9682/22871/120892/9315/2932/5728/8835/4208/22954/4211/147040/2260/1453/2475/55000/4976/596/57534/9638/9043/58190/50937/23531/60436/27339/80279/1894/85458/10362/259266/25942/6495/9181/6929/1977/7161/182/463/55755/1808/4825/8851/274/79191/5881/1789/2138/1745/6925/10215/1746/3199/30812/654/23462/3280/2119	68
501Mel	GO:0006401	RNA catabolic process	92/4741	278/18723	0.00211425	0.026019	0.0217831	6041/85441/57060/10140/23053/253943/10179/65080/22882/22849/7431/9811/79675/10922/5578/9641/6050/23293/79048/2475/129563/27044/131870/192670/201626/29102/9704/10921/87178/2521/26986/2935/10236/1660/54888/5433/81892/3192/55596/255967/9567/92345/4670/2237/399664/84153/10492/55795/3183/8148/5394/167227/79621/57819/23016/3646/5580/10535/28960/472/3184/51690/7186/4869/10642/23658/55110/8635/26019/2303…	92
501Mel	GO:0045055	regulated exocytosis	78/4741	230/18723	0.00212017	0.0260407	0.0218012	5730/6616/57586/3745/9143/10815/8618/9145/2039/5864/6861/6812/6855/23621/5873/695/6844/2241/64780/57617/10497/5170/9751/192683/8775/22871/120892/2932/8372/6845/808/80331/9230/9342/10755/9581/23208/9341/10890/5579/3162/5663/27072/1020/80223/164/23396/22930/22841/56848/26056/8773/23513/8676/84283/6804/84062/8867/27040/2054/3134/27445/5293/9144/6284/8013/4067/9900/5028/3566/1488/10675/9846/11031/113…	78
501Mel	GO:0006631	fatty acid metabolic process	124/4741	390/18723	0.00217845	0.0267041	0.0223566	5730/9104/2052/1384/35/5354/80221/1666/2110/55902/7306/3248/36/51084/10891/80724/2948/23175/3032/1962/30/5164/56898/254552/283927/79993/5264/80142/1738/570/23409/34/23417/79966/57406/50640/32/8824/10005/5465/5165/113612/10449/84266/38/10994/2950/215/64900/2108/51099/1376/8310/5564/5447/6342/1892/54677/1374/549/3030/23038/5095/6319/137964/7376/1891/23659/9926/54995/51/10999/219743/83752/2475/3295/…	124
501Mel	GO:0031100	animal organ regeneration	31/4741	76/18723	0.0021986	0.0268985	0.0225194	9104/10076/23175/570/578/2950/7048/1374/3162/6143/87178/6209/6426/7298/10419/983/890/57539/471/7351/8013/5471/26019/2146/5111/1051/5727/5228/595/1361/3936	31
501Mel	GO:0000910	cytokinesis	61/4741	173/18723	0.00223114	0.0272434	0.0228081	200942/288/9820/10096/5581/51100/324/8678/55958/808/9371/10755/84936/9101/9525/26073/598/5339/9798/8766/11258/11021/4628/27243/257364/9094/29127/994/9738/3925/388/79848/55521/55660/9055/1894/144455/675/55165/9700/403/5347/25909/6840/8502/8556/9928/990/10733/51203/1058/79733/9212/11113/51429/9493/9585/79187/1263/27443/56776	61
501Mel	GO:0032456	endocytic recycling	30/4741	73/18723	0.00224088	0.0273091	0.0228631	11149/2060/10079/10938/23339/30844/30846/84162/163486/9230/28952/55275/10123/8724/29934/8766/392/55737/54520/11021/7879/5872/23513/88/9495/10228/64284/84079/30845/22876	30
501Mel	GO:0007041	lysosomal transport	43/4741	114/18723	0.00226267	0.0274678	0.022996	51332/83547/65018/8031/138050/23274/57617/51479/23339/2896/55681/411/120892/4534/54664/66008/6845/55823/9765/23295/55275/9842/6272/3920/63894/219931/27072/9525/64400/164/22863/4864/55737/7251/7879/388/9648/23400/151636/203228/114804/30845/274	43
501Mel	GO:1903008	organelle disassembly	43/4741	114/18723	0.00226267	0.0274678	0.022996	23130/10133/65018/10891/55187/291/79594/11337/23376/23710/10013/51368/9927/8678/54832/7157/3064/8729/84340/2801/292/81631/55102/6721/11345/10533/6811/22863/55062/10075/51506/51569/11140/79752/3091/7855/23400/983/55294/8444/7443/3099/1263	43
501Mel	GO:0008156	negative regulation of DNA replication	16/4741	32/18723	0.00229109	0.0277053	0.0231949	7157/10533/7013/23560/345643/84083/7270/6282/675/64061/51053/8914/990/26271/54962/641	16
501Mel	GO:0034243	regulation of transcription elongation from RNA polymerase II promoter	16/4741	32/18723	0.00229109	0.0277053	0.0231949	8861/6830/51497/10771/85403/9400/51574/123169/3192/7469/165918/10915/23160/1499/2146/55840	16
501Mel	GO:0043967	histone H4 acetylation	28/4741	67/18723	0.0023068	0.0278416	0.0233089	3662/26009/8648/26038/55683/23326/55929/51230/10626/54556/79903/80314/151507/55167/672/11091/8607/51176/9767/675/4297/408/8520/8089/55011/79960/86/2648	28
501Mel	GO:0006475	internal protein amino acid acetylation	57/4741	160/18723	0.00234317	0.0279396	0.023391	3662/10891/4137/26009/9027/27154/8648/26038/51105/5447/55683/23326/93624/8861/55929/8986/57326/51230/10626/9913/7917/54556/9862/79903/56848/80314/23741/6883/23137/29117/151507/55167/55257/672/6871/6418/11091/8607/51176/9767/675/25942/4297/54107/408/1111/8520/8089/55011/7703/22976/79960/86/2648/55689/9252/8850	57
501Mel	GO:0001783	B cell apoptotic process	13/4741	24/18723	0.00235648	0.0279396	0.023391	695/578/5728/8915/8660/581/4067/100/27242/9212/57181/10758/407975	13
501Mel	GO:0051905	establishment of pigment granule localization	13/4741	24/18723	0.00235648	0.0279396	0.023391	129880/5873/4644/79083/1001/9230/4935/5861/10540/8195/8766/55686/64284	13
501Mel	GO:0060561	apoptotic process involved in morphogenesis	13/4741	24/18723	0.00235648	0.0279396	0.023391	7042/1410/578/7849/2296/3714/23513/5519/7855/51176/581/9464/4041	13
501Mel	GO:0001921	positive regulation of receptor recycling	9/4741	14/18723	0.00236398	0.0279396	0.023391	11149/2060/4905/302/9341/5663/23513/1889/22876	9
501Mel	GO:0010771	negative regulation of cell morphogenesis involved in differentiation	9/4741	14/18723	0.00236398	0.0279396	0.023391	2039/9270/55920/81/23603/1946/2192/23189/81848	9
501Mel	GO:0034616	response to laminar fluid shear stress	9/4741	14/18723	0.00236398	0.0279396	0.023391	2113/5607/6721/5598/8754/7043/4780/9314/4092	9
501Mel	GO:0035563	positive regulation of chromatin binding	9/4741	14/18723	0.00236398	0.0279396	0.023391	79618/81857/114991/151636/51053/81620/83666/1488/1663	9
501Mel	GO:0055057	neuroblast division	9/4741	14/18723	0.00236398	0.0279396	0.023391	1638/10890/85440/51176/6660/259266/9181/80709/2258	9
501Mel	GO:1900025	negative regulation of substrate adhesion-dependent cell spreading	9/4741	14/18723	0.00236398	0.0279396	0.023391	2039/9270/55920/81/23603/1946/2192/23189/81848	9
501Mel	GO:1904923	regulation of autophagy of mitochondrion in response to mitochondrial depolarization	9/4741	14/18723	0.00236398	0.0279396	0.023391	10133/65018/79594/10013/9927/54832/10075/11140/3099	9
501Mel	GO:0016055	Wnt signaling pathway	139/4741	444/18723	0.00237303	0.0279937	0.0234363	144165/348/27123/1501/51421/57447/100507050/10076/23002/54795/9679/84327/26524/8994/25776/3675/25806/57658/8658/406/65268/27303/4163/55681/9839/6468/1001/120892/2932/324/5728/147699/10927/63977/2262/25/4435/54894/4286/81847/8861/1453/51741/3728/5663/8724/169200/5518/9101/53944/57326/26959/8945/9275/6659/54949/1540/57154/55737/1857/65125/51701/6497/10413/55182/65062/10979/6789/29117/151195/9580/96…	139
501Mel	GO:0022037	metencephalon development	41/4741	108/18723	0.00245984	0.0289162	0.0242086	51286/18/6331/4967/25809/10891/1272/23026/8925/8648/6712/27089/5058/7157/4669/25/1152/8861/57502/2296/5663/146057/1020/596/23513/7515/23322/79809/869/3184/473/471/3975/2146/9928/2648/8851/340719/54910/2637/4983	41
501Mel	GO:2001233	regulation of apoptotic signaling pathway	114/4741	356/18723	0.00246046	0.0289162	0.0242086	3479/56917/65018/6648/7001/4000/8837/27069/8737/754/5607/10449/9500/2950/10105/9479/8406/120892/2932/10488/5728/4722/8678/7157/7417/5770/22954/3064/8915/2260/8772/10116/292/7466/5970/51741/3162/5663/5601/4150/5598/598/4976/3315/596/79886/1540/10771/2729/25946/5371/51079/4170/10413/83787/4193/3622/1495/51060/5519/219790/6188/6789/8682/26574/6498/672/3091/2534/55294/6135/6201/9181/1512/153090/1649/…	114
501Mel	GO:0032205	negative regulation of telomere maintenance	17/4741	35/18723	0.00250965	0.0293292	0.0245543	8658/2072/26277/23293/54386/7013/65057/3192/7515/80169/3183/5394/167227/472/3178/54984/80119	17
501Mel	GO:0072528	pyrimidine-containing compound biosynthetic process	17/4741	35/18723	0.00250965	0.0293292	0.0245543	27010/7084/10201/2475/83549/139596/1723/7298/9519/1841/1503/4830/4833/1854/7378/5631/7371	17
501Mel	GO:0097421	liver regeneration	17/4741	35/18723	0.00250965	0.0293292	0.0245543	9104/1374/3162/6143/87178/6209/6426/7298/10419/57539/7351/2146/5111/1051/5727/595/1361	17
[truncated: 1,083 more rows]
