# Supplementary material for: A Network of MicroRNAs and mRNAs Involved in Melanosome Maturation and Trafficking Defines the Lower Response of Pigmentable Melanoma Cells to Targeted Therapy
Source: Cancers (Basel). 2023 Jan 31;15(3):894. doi: 10.3390/cancers15030894 (PMC9913661; doi:10.3390/cancers15030894)
Supplement: Supplementary file 1 [file cancers-15-00894-s001.zip › Supplementary Table S8-List of 501Mel and SK-Mel-5 genes belonging to modules #1,2,3.xlsx]

## Sheet: network_nodes
node	Hub	Region	Type	Total_Degree	Internal_Degree	APCC	Hub_classification	P	z	Cluster_ID	IQR	perc_zeros	logFC	pval	pval_adj	is_swtch	direction	Swtch in A375
AAMDC	non local hub	R4	Non-hub kinless nodes	166	54	-0.320802	FIGHT CLUB	0.894179	-2.41026	1	0.843322	0	0.844777	0.0128333	0.0178066	yes	UP	no
ABAT	non local hub	R4	Non-hub kinless nodes	500	171	-0.291414	FIGHT CLUB	0.883036	-1.4148	1	0.813025	0	0.798203	9.44708e-05	0.000759868	yes	UP	no
ABCB5	non local hub	R4	Non-hub kinless nodes	462	184	-0.185805	FIGHT CLUB	0.841382	-1.30419	1	1.47486	0	1.38767	6.57121e-07	9.78911e-05	yes	UP	no
ABR	non local hub	R4	Non-hub kinless nodes	294	121	-0.156265	FIGHT CLUB	0.830615	-1.84021	1	1.47622	0	0.855154	0.00383337	0.00706594	yes	UP	no		Module ID	Count
ACAA1	non local hub	R4	Non-hub kinless nodes	363	117	-0.331866	FIGHT CLUB	0.896114	-1.87424	1	0.759523	0	0.731729	0.00641354	0.0102961	yes	UP	no		module 1	479
ACADM	non local hub	R4	Non-hub kinless nodes	473	158	-0.314124	FIGHT CLUB	0.888419	-1.5254	1	0.732101	0	0.744862	0.000132482	0.000917963	yes	UP	no		module 2	381
ACADSB	non local hub	R4	Non-hub kinless nodes	475	177	-0.238835	FIGHT CLUB	0.861146	-1.36375	1	0.81444	0	0.897452	0.00197871	0.00443398	yes	UP	no		module 3	391
ACO2	non local hub	R4	Non-hub kinless nodes	482	186	-0.216487	FIGHT CLUB	0.851087	-1.28717	1	1.24852	0	1.2309	0.00186944	0.00427848	yes	UP	no		Grand Total	1251
ACSS2	non local hub	R4	Non-hub kinless nodes	331	107	-0.324969	FIGHT CLUB	0.895501	-1.95932	1	0.710298	0	0.858565	0.0166964	0.0222076	yes	UP	no
ADCY2	non local hub	R4	Non-hub kinless nodes	253	109	-0.126473	FIGHT CLUB	0.814385	-1.94231	1	1.28679	0	0.899952	5.1538e-05	0.000570279	yes	UP	no
ADD1	non local hub	R4	Non-hub kinless nodes	473	161	-0.291491	FIGHT CLUB	0.884141	-1.49988	1	0.930778	0	0.945468	0.000159112	0.00100912	yes	UP	no
ADI1	non local hub	R4	Non-hub kinless nodes	408	170	-0.155631	FIGHT CLUB	0.826389	-1.42331	1	1.01221	0	0.993104	0.00203398	0.00451331	yes	UP	no
AGL	non local hub	R4	Non-hub kinless nodes	283	117	-0.155032	FIGHT CLUB	0.829078	-1.87424	1	1.40523	0	0.809808	0.00911605	0.0135024	yes	UP	no
AHCYL1	non local hub	R4	Non-hub kinless nodes	278	111	-0.183798	FIGHT CLUB	0.840575	-1.92529	1	2.0371	0	1.18512	0.00547081	0.00912916	yes	UP	no
AHCYL2	non local hub	R4	Non-hub kinless nodes	370	134	-0.254898	FIGHT CLUB	0.868839	-1.7296	1	0.937826	0	0.887225	0.000415742	0.00168475	yes	UP	no
AHRR	non local hub	R4	Non-hub kinless nodes	418	152	-0.252091	FIGHT CLUB	0.867769	-1.57645	1	1.29882	0	1.28699	8.06657e-06	0.000248775	yes	UP	yes
ALDH2	non local hub	R4	Non-hub kinless nodes	345	149	-0.11933	FIGHT CLUB	0.813476	-1.60198	1	1.1712	0	0.910132	0.00171674	0.00403212	yes	UP	no
AMOTL2	non local hub	R4	Non-hub kinless nodes	230	102	-0.102862	FIGHT CLUB	0.803327	-2.00186	1	1.18011	0	0.816099	4.65087e-05	0.000546669	yes	UP	no
APOE	non local hub	R4	Non-hub kinless nodes	480	206	-0.127126	FIGHT CLUB	0.815816	-1.11701	1	2.54732	0	2.33853	0.000264762	0.00134182	yes	UP	no
ARMCX3	non local hub	R4	Non-hub kinless nodes	328	121	-0.242714	FIGHT CLUB	0.863911	-1.84021	1	0.87764	0	0.748589	0.000555841	0.00198837	yes	UP	no
ASPA	non local hub	R4	Non-hub kinless nodes	482	191	-0.191977	FIGHT CLUB	0.842974	-1.24463	1	1.8251	0	1.87136	0.00103656	0.00293564	yes	UP	no
ASRGL1	non local hub	R4	Non-hub kinless nodes	317	118	-0.230655	FIGHT CLUB	0.861438	-1.86573	1	1.09009	0	0.882604	0.0015507	0.00377599	yes	UP	no
ATG4D	non local hub	R4	Non-hub kinless nodes	270	101	-0.225797	FIGHT CLUB	0.860069	-2.01037	1	0.678124	0	0.699494	0.0152103	0.0204971	yes	UP	no
ATP1A3	non local hub	R4	Non-hub kinless nodes	359	140	-0.202278	FIGHT CLUB	0.847922	-1.67855	1	2.55923	0	2.64825	0.0125907	0.0175045	yes	UP	no
ATP6AP1	non local hub	R4	Non-hub kinless nodes	418	143	-0.295964	FIGHT CLUB	0.882964	-1.65303	1	0.79328	0	0.847086	0.00432614	0.00772514	yes	UP	no
BBS1	non local hub	R4	Non-hub kinless nodes	331	131	-0.192927	FIGHT CLUB	0.843366	-1.75513	1	1.25052	0	0.808891	0.000122601	0.000872224	yes	UP	no
BBS5	non local hub	R4	Non-hub kinless nodes	479	164	-0.289622	FIGHT CLUB	0.882776	-1.47436	1	1.20564	0	1.25023	0.000512859	0.00189423	yes	UP	no
BCAN	non local hub	R4	Non-hub kinless nodes	521	188	-0.25849	FIGHT CLUB	0.869791	-1.27016	1	2.59559	0	2.59668	0.000154295	0.000995824	yes	UP	no
BDH1	non local hub	R4	Non-hub kinless nodes	337	132	-0.19874	FIGHT CLUB	0.846578	-1.74662	1	1.16318	0	0.768887	0.000132578	0.000917963	yes	UP	no
BHLHE41	non local hub	R4	Non-hub kinless nodes	228	75	-0.326253	FIGHT CLUB	0.891794	-2.23159	1	2.81676	0	1.25382	0.000157775	0.0010073	yes	UP	no
BLCAP	non local hub	R4	Non-hub kinless nodes	424	154	-0.25456	FIGHT CLUB	0.86808	-1.55944	1	0.88437	0	0.925901	0.0037506	0.00694462	yes	UP	no
BMPR2	non local hub	R4	Non-hub kinless nodes	262	84	-0.336091	FIGHT CLUB	0.897209	-2.15501	1	0.729486	0	0.785911	0.00284484	0.00566892	yes	UP	no
BTBD10	non local hub	R4	Non-hub kinless nodes	371	143	-0.214267	FIGHT CLUB	0.851432	-1.65303	1	1.12974	0	0.840744	0.000170035	0.00103709	yes	UP	no
BTBD9	non local hub	R4	Non-hub kinless nodes	339	136	-0.180501	FIGHT CLUB	0.839055	-1.71259	1	0.768727	0	0.821051	0.0121553	0.0170195	yes	UP	no
BTK	non local hub	R4	Non-hub kinless nodes	323	109	-0.29995	FIGHT CLUB	0.88612	-1.94231	1	1.07319	0	1.01573	0.000899096	0.00266262	yes	UP	no
C17orf77	non local hub	R4	Non-hub kinless nodes	398	158	-0.188747	FIGHT CLUB	0.842403	-1.5254	1	3.14291	8.33333	3.05779	2.66449e-06	0.000168185	yes	UP	no
C19orf12	non local hub	R4	Non-hub kinless nodes	468	179	-0.214616	FIGHT CLUB	0.85371	-1.34673	1	0.876265	0	0.899027	3.53405e-06	0.000177308	yes	UP	no
C1orf198	non local hub	R4	Non-hub kinless nodes	500	193	-0.211997	FIGHT CLUB	0.851004	-1.22762	1	1.47458	0	1.49019	1.14684e-05	0.000292574	yes	UP	yes
C1orf54	non local hub	R4	Non-hub kinless nodes	414	173	-0.149203	FIGHT CLUB	0.825381	-1.39778	1	1.51204	0	1.52681	0.00229396	0.00487132	yes	UP	no
C21orf91	non local hub	R4	Non-hub kinless nodes	498	180	-0.259169	FIGHT CLUB	0.869357	-1.33822	1	1.46617	0	1.42343	1.58518e-05	0.000331078	yes	UP	no
C5orf24	non local hub	R4	Non-hub kinless nodes	320	84	-0.437458	FIGHT CLUB	0.931094	-2.15501	1	0.798499	0	0.688028	0.0139841	0.0191173	yes	UP	no
C7orf31	non local hub	R4	Non-hub kinless nodes	351	148	-0.143517	FIGHT CLUB	0.822209	-1.61049	1	0.783102	0	0.846477	1.9026e-05	0.000350307	yes	UP	no
CA14	non local hub	R4	Non-hub kinless nodes	195	65	-0.298453	FIGHT CLUB	0.888889	-2.31667	1	0.856069	0	0.918434	0.00122556	0.00325927	yes	UP	no
CABLES1	non local hub	R4	Non-hub kinless nodes	476	182	-0.214681	FIGHT CLUB	0.853806	-1.32121	1	0.955435	0	0.954251	3.20447e-06	0.000173112	yes	UP	no
CALCOCO1	non local hub	R4	Non-hub kinless nodes	262	110	-0.143897	FIGHT CLUB	0.823728	-1.9338	1	1.08293	0	1.02696	0.00157547	0.00382093	yes	UP	no
CAPN1	non local hub	R4	Non-hub kinless nodes	352	121	-0.290034	FIGHT CLUB	0.881836	-1.84021	1	0.890269	0	0.871276	0.0117504	0.0165373	yes	UP	no
CAV2	non local hub	R4	Non-hub kinless nodes	493	175	-0.267089	FIGHT CLUB	0.873997	-1.38076	1	0.756026	0	0.780026	0.000140412	0.000954725	yes	UP	no
CBY1	non local hub	R4	Non-hub kinless nodes	428	182	-0.130149	FIGHT CLUB	0.819176	-1.32121	1	0.809977	0	0.69877	4.47178e-05	0.000542854	yes	UP	no
CCDC171	non local hub	R4	Non-hub kinless nodes	491	190	-0.210748	FIGHT CLUB	0.850258	-1.25314	1	2.06309	0	2.03328	0.000185958	0.00108959	yes	UP	no
CCDC92	non local hub	R4	Non-hub kinless nodes	384	158	-0.159537	FIGHT CLUB	0.830702	-1.5254	1	0.837016	0	0.909971	2.49883e-05	0.000409891	yes	UP	no
CD99L2	non local hub	R4	Non-hub kinless nodes	371	136	-0.247281	FIGHT CLUB	0.865621	-1.71259	1	0.704011	0	0.844148	0.00214906	0.00465615	yes	UP	no
CDH7	non local hub	R4	Non-hub kinless nodes	452	197	-0.119277	FIGHT CLUB	0.810043	-1.19358	1	1.33233	0	1.29991	0.0012615	0.00331101	yes	UP	no
CDK2AP2	non local hub	R4	Non-hub kinless nodes	287	109	-0.221851	FIGHT CLUB	0.855759	-1.94231	1	0.799181	0	0.769821	0.000288346	0.00140209	yes	UP	no
CDKL5	non local hub	R4	Non-hub kinless nodes	276	107	-0.205357	FIGHT CLUB	0.849703	-1.95932	1	0.673107	0	0.681647	0.000871148	0.0026193	yes	UP	no
CELF2	non local hub	R4	Non-hub kinless nodes	105	29	-0.411262	FIGHT CLUB	0.923719	-2.62296	1	1.15674	0	1.21097	0.0215041	0.0274511	yes	UP	no
CERS4	non local hub	R4	Non-hub kinless nodes	162	72	-0.0956258	FIGHT CLUB	0.802469	-2.25711	1	1.24639	0	1.29013	1.7937e-05	0.000342748	yes	UP	yes
CFAP61	non local hub	R4	Non-hub kinless nodes	395	163	-0.157402	FIGHT CLUB	0.829713	-1.48286	1	1.72125	0	1.42926	1.6298e-05	0.000331078	yes	UP	no
CHSY3	non local hub	R4	Non-hub kinless nodes	296	116	-0.199128	FIGHT CLUB	0.846421	-1.88275	1	1.45939	0	0.988659	0.00121954	0.00325092	yes	UP	no
CLCN7	non local hub	R4	Non-hub kinless nodes	363	156	-0.123412	FIGHT CLUB	0.815313	-1.54242	1	0.955869	0	0.997248	8.2421e-05	0.00070344	yes	UP	no
CLIC4	non local hub	R4	Non-hub kinless nodes	408	151	-0.241554	FIGHT CLUB	0.863027	-1.58496	1	0.824705	0	0.785837	8.47625e-05	0.000712497	yes	UP	no
CNPPD1	non local hub	R4	Non-hub kinless nodes	480	193	-0.179292	FIGHT CLUB	0.838329	-1.22762	1	1.44042	0	1.33571	4.33299e-06	0.000202866	yes	UP	no
COL6A1	non local hub	R4	Non-hub kinless nodes	385	145	-0.223827	FIGHT CLUB	0.858155	-1.63601	1	0.667364	0	0.751303	0.00128878	0.0033515	yes	UP	no
COX6A1	non local hub	R4	Non-hub kinless nodes	487	180	-0.240079	FIGHT CLUB	0.863389	-1.33822	1	0.744272	0	0.761907	6.82721e-05	0.000645052	yes	UP	no
CPED1	non local hub	R4	Non-hub kinless nodes	313	128	-0.160931	FIGHT CLUB	0.832763	-1.78065	1	0.90681	0	0.777328	0.000340176	0.00152305	yes	UP	no
CPQ	non local hub	R4	Non-hub kinless nodes	484	185	-0.217912	FIGHT CLUB	0.853899	-1.29568	1	1.22449	0	1.2206	8.08554e-07	0.000101536	yes	UP	no
CRAT	non local hub	R4	Non-hub kinless nodes	252	85	-0.297948	FIGHT CLUB	0.886228	-2.1465	1	1.2023	0	1.09679	0.0304795	0.037338	yes	UP	no
CRTC1	non local hub	R4	Non-hub kinless nodes	340	104	-0.349902	FIGHT CLUB	0.906436	-1.98485	1	0.788912	0	0.796159	0.000443252	0.00175445	yes	UP	no
CRYL1	non local hub	R4	Non-hub kinless nodes	398	155	-0.197792	FIGHT CLUB	0.848331	-1.55093	1	1.2451	0	1.26678	2.51778e-05	0.000409891	yes	UP	yes
CS	non local hub	R4	Non-hub kinless nodes	488	162	-0.311212	FIGHT CLUB	0.889798	-1.49137	1	0.726277	0	0.705967	0.0015055	0.00370236	yes	UP	no
CTNND2	non local hub	R4	Non-hub kinless nodes	417	178	-0.130374	FIGHT CLUB	0.817792	-1.35524	1	1.45707	0	1.34047	0.000479611	0.00183044	yes	UP	no
CTNS	non local hub	R4	Non-hub kinless nodes	468	189	-0.177693	FIGHT CLUB	0.836908	-1.26165	1	0.783818	0	0.839457	0.000117146	0.000845654	yes	UP	no
CTSA	non local hub	R4	Non-hub kinless nodes	219	92	-0.14734	FIGHT CLUB	0.823523	-2.08695	1	1.39347	0	0.732991	3.50444e-05	0.000474596	yes	UP	yes
CTSD	non local hub	R4	Non-hub kinless nodes	451	169	-0.22902	FIGHT CLUB	0.859583	-1.43181	1	0.904062	0	0.978924	6.57916e-05	0.00063418	yes	UP	yes
CYB5D2	non local hub	R4	Non-hub kinless nodes	354	130	-0.24306	FIGHT CLUB	0.865141	-1.76363	1	0.914996	0	0.960538	0.000165457	0.00102313	yes	UP	yes
CYP27A1	non local hub	R4	Non-hub kinless nodes	456	168	-0.239669	FIGHT CLUB	0.864266	-1.44032	1	0.886367	0	0.915375	0.000460471	0.00178805	yes	UP	yes
DCT	non local hub	R4	Non-hub kinless nodes	480	158	-0.320706	FIGHT CLUB	0.891649	-1.5254	1	2.28297	0	2.25532	0.000783421	0.00243826	yes	UP	yes
DECR1	non local hub	R4	Non-hub kinless nodes	333	134	-0.174398	FIGHT CLUB	0.838072	-1.7296	1	1.26294	0	1.32786	0.000211064	0.00118181	yes	UP	no
DHRS4	non local hub	R4	Non-hub kinless nodes	415	171	-0.159317	FIGHT CLUB	0.830216	-1.4148	1	0.772753	0	0.869826	0.00173458	0.00406056	yes	UP	no
DIP2C	non local hub	R4	Non-hub kinless nodes	410	161	-0.193075	FIGHT CLUB	0.8458	-1.49988	1	0.77904	0	0.723622	7.25712e-05	0.000665597	yes	UP	no
DKK2	non local hub	R4	Non-hub kinless nodes	266	117	-0.103696	FIGHT CLUB	0.806532	-1.87424	1	1.39833	0	0.93529	0.0268316	0.0332839	yes	UP	no
DMXL1	non local hub	R4	Non-hub kinless nodes	473	160	-0.298376	FIGHT CLUB	0.885576	-1.50839	1	0.958771	0	0.969474	0.00142686	0.00358063	yes	UP	no
DMXL2	non local hub	R4	Non-hub kinless nodes	413	177	-0.124524	FIGHT CLUB	0.816327	-1.36375	1	1.02968	0	0.941408	0.000463105	0.00179403	yes	UP	no
DUSP15	non local hub	R4	Non-hub kinless nodes	394	143	-0.247306	FIGHT CLUB	0.868272	-1.65303	1	1.04764	0	0.924769	5.71674e-05	0.000591452	yes	UP	no
DUSP3	non local hub	R4	Non-hub kinless nodes	422	177	-0.151286	FIGHT CLUB	0.824077	-1.36375	1	0.795015	0	0.861922	0.004493	0.00794231	yes	UP	no
EFR3A	non local hub	R4	Non-hub kinless nodes	291	95	-0.324207	FIGHT CLUB	0.893424	-2.06142	1	0.726385	0	0.681275	0.0129462	0.017943	yes	UP	no
EMP1	non local hub	R4	Non-hub kinless nodes	196	77	-0.197677	FIGHT CLUB	0.845663	-2.21457	1	2.47552	0	0.880358	0.0117086	0.0165022	yes	UP	no
EPAS1	non local hub	R4	Non-hub kinless nodes	254	99	-0.206274	FIGHT CLUB	0.848084	-2.02739	1	2.69307	0	1.36033	0.0021674	0.00468554	yes	UP	no
EPHX1	non local hub	R4	Non-hub kinless nodes	429	149	-0.286836	FIGHT CLUB	0.879369	-1.60198	1	1.27111	0	1.35978	0.00165873	0.00394442	yes	UP	no
EPM2A	non local hub	R4	Non-hub kinless nodes	448	171	-0.220392	FIGHT CLUB	0.854308	-1.4148	1	0.831312	0	0.855836	2.12442e-06	0.000155875	yes	UP	no
EPS15	non local hub	R4	Non-hub kinless nodes	473	190	-0.181682	FIGHT CLUB	0.838644	-1.25314	1	1.45585	0	1.37945	2.10399e-07	9.78911e-05	yes	UP	no
ESRP1	non local hub	R4	Non-hub kinless nodes	472	161	-0.293205	FIGHT CLUB	0.88365	-1.49988	1	1.64135	0	1.67509	2.50412e-06	0.000168185	yes	UP	yes
ETFDH	non local hub	R4	Non-hub kinless nodes	475	185	-0.209632	FIGHT CLUB	0.84831	-1.29568	1	1.0166	0	0.939175	0.00126452	0.0033141	yes	UP	no
ETS1	non local hub	R4	Non-hub kinless nodes	434	167	-0.209107	FIGHT CLUB	0.851935	-1.44883	1	1.11357	0	1.0728	8.26164e-07	0.000101536	yes	UP	yes
EVI5L	non local hub	R4	Non-hub kinless nodes	436	156	-0.264234	FIGHT CLUB	0.87198	-1.54242	1	0.840393	0	0.914863	0.00197858	0.00443398	yes	UP	no
EXOC6B	non local hub	R4	Non-hub kinless nodes	498	172	-0.286321	FIGHT CLUB	0.880712	-1.40629	1	0.720139	0	0.733067	0.00117338	0.00317466	yes	UP	no
FAHD1	non local hub	R4	Non-hub kinless nodes	455	175	-0.208373	FIGHT CLUB	0.852071	-1.38076	1	0.759957	0	0.769821	6.25634e-05	0.000623656	yes	UP	no
FAM102A	non local hub	R4	Non-hub kinless nodes	184	75	-0.171106	FIGHT CLUB	0.833855	-2.23159	1	1.91236	0	0.890857	0.00308325	0.00601169	yes	UP	yes
FAM124A	non local hub	R4	Non-hub kinless nodes	475	182	-0.214736	FIGHT CLUB	0.85319	-1.32121	1	1.05156	0	1.04022	3.40962e-07	9.78911e-05	yes	UP	no
FAM13B	non local hub	R4	Non-hub kinless nodes	334	111	-0.314009	FIGHT CLUB	0.889553	-1.92529	1	0.583403	0	0.728589	0.000726388	0.00233241	yes	UP	yes
FAM151B	non local hub	R4	Non-hub kinless nodes	300	129	-0.123251	FIGHT CLUB	0.8151	-1.77214	1	0.959518	0	1.04167	9.60861e-06	0.000271471	yes	UP	no
FAM167B	non local hub	R4	Non-hub kinless nodes	239	104	-0.120539	FIGHT CLUB	0.810648	-1.98485	1	1.13594	0	0.801042	0.00260955	0.00532969	yes	UP	no
FAM189A2	non local hub	R4	Non-hub kinless nodes	288	127	-0.105078	FIGHT CLUB	0.805543	-1.78916	1	0.663964	0	0.700956	0.000333831	0.00150625	yes	UP	no
FAM222A	non local hub	R4	Non-hub kinless nodes	315	107	-0.288249	FIGHT CLUB	0.884616	-1.95932	1	0.98993	0	0.987338	0.000118575	0.000853459	yes	UP	no
FAM53B	non local hub	R4	Non-hub kinless nodes	415	163	-0.194321	FIGHT CLUB	0.845731	-1.48286	1	1.08398	0	1.12603	2.72777e-06	0.000168185	yes	UP	no
FAM81A	non local hub	R4	Non-hub kinless nodes	508	210	-0.160098	FIGHT CLUB	0.829112	-1.08298	1	1.17199	0	1.14622	4.52847e-05	0.000542975	yes	UP	no
FHOD3	non local hub	R4	Non-hub kinless nodes	312	122	-0.20016	FIGHT CLUB	0.847099	-1.8317	1	1.41326	0	0.965449	0.00139943	0.00353525	yes	UP	no
FLYWCH1	non local hub	R4	Non-hub kinless nodes	453	172	-0.21958	FIGHT CLUB	0.855835	-1.40629	1	0.755085	0	0.817438	7.78552e-05	0.000690859	yes	UP	no
FN3K	non local hub	R4	Non-hub kinless nodes	240	97	-0.177298	FIGHT CLUB	0.836649	-2.04441	1	3.0548	0	1.42664	0.00653115	0.0104312	yes	UP	no
FSTL5	non local hub	R4	Non-hub kinless nodes	321	135	-0.154352	FIGHT CLUB	0.823129	-1.72109	1	1.0231	0	0.970419	0.0136426	0.0187749	yes	UP	no
FXYD6	non local hub	R4	Non-hub kinless nodes	225	100	-0.0957252	FIGHT CLUB	0.802469	-2.01888	1	0.761934	0	0.706959	0.00118739	0.0032018	yes	UP	no
GAA	non local hub	R4	Non-hub kinless nodes	180	79	-0.115368	FIGHT CLUB	0.807377	-2.19755	1	2.63449	0	1.17178	0.00458626	0.00805791	yes	UP	no
GAB1	non local hub	R4	Non-hub kinless nodes	504	200	-0.189874	FIGHT CLUB	0.84253	-1.16806	1	1.16844	0	1.16469	2.00464e-05	0.000360982	yes	UP	no
GABARAP	non local hub	R4	Non-hub kinless nodes	485	187	-0.209648	FIGHT CLUB	0.851338	-1.27867	1	0.807257	0	0.80217	0.000219619	0.00121172	yes	UP	no
GABRA3	non local hub	R4	Non-hub kinless nodes	485	159	-0.320274	FIGHT CLUB	0.892524	-1.5169	1	0.627198	0	0.697176	0.000241816	0.00128037	yes	UP	no
GALNS	non local hub	R4	Non-hub kinless nodes	361	118	-0.325115	FIGHT CLUB	0.893156	-1.86573	1	0.895139	0	0.909738	0.00312318	0.00606621	yes	UP	no
GALNT3	non local hub	R4	Non-hub kinless nodes	231	83	-0.254908	FIGHT CLUB	0.870898	-2.16352	1	0.95522	0	1.10005	0.000984367	0.00283821	yes	UP	no
GAS2L1	non local hub	R4	Non-hub kinless nodes	180	66	-0.238165	FIGHT CLUB	0.865556	-2.30816	1	1.17874	0	1.10358	0.0151419	0.0204163	yes	UP	no
GBA2	non local hub	R4	Non-hub kinless nodes	312	121	-0.214381	FIGHT CLUB	0.849595	-1.84021	1	0.647884	0	0.747586	0.0080984	0.0123409	yes	UP	no
GDPD5	non local hub	R4	Non-hub kinless nodes	316	128	-0.172918	FIGHT CLUB	0.835924	-1.78065	1	1.69026	0	1.53868	1.20084e-05	0.000296649	yes	UP	no
GM2A	non local hub	R4	Non-hub kinless nodes	300	120	-0.183979	FIGHT CLUB	0.84	-1.84872	1	0.848304	0	0.857679	0.000103296	0.000786034	yes	UP	no
GPAT4	non local hub	R4	Non-hub kinless nodes	252	110	-0.11338	FIGHT CLUB	0.809461	-1.9338	1	0.897373	0	0.685177	4.59561e-05	0.000543077	yes	UP	no
GPNMB	non local hub	R4	Non-hub kinless nodes	426	152	-0.266223	FIGHT CLUB	0.872688	-1.57645	1	0.683675	0	0.714455	7.49389e-07	9.80236e-05	yes	UP	yes
GPR143	non local hub	R4	Non-hub kinless nodes	351	127	-0.252069	FIGHT CLUB	0.869084	-1.78916	1	0.658799	0	0.70687	0.00025091	0.00130691	yes	UP	no
GPR158	non local hub	R4	Non-hub kinless nodes	213	78	-0.249962	FIGHT CLUB	0.8659	-2.20606	1	1.77062	0	0.791694	0.00427249	0.00766834	yes	UP	no
GRN	non local hub	R4	Non-hub kinless nodes	322	136	-0.138222	FIGHT CLUB	0.821612	-1.71259	1	0.78889	0	0.860052	0.000143032	0.000960391	yes	UP	yes
GSTK1	non local hub	R4	Non-hub kinless nodes	357	125	-0.279775	FIGHT CLUB	0.877402	-1.80618	1	1.11451	0	1.08747	0.00301112	0.00591634	yes	UP	no
GUCD1	non local hub	R4	Non-hub kinless nodes	444	147	-0.312357	FIGHT CLUB	0.890385	-1.61899	1	0.69065	0	0.697185	0.00359019	0.00672613	yes	UP	no
HADHB	non local hub	R4	Non-hub kinless nodes	521	202	-0.208568	FIGHT CLUB	0.849676	-1.15104	1	0.945212	0	0.952112	0.000319428	0.00147309	yes	UP	no
HAO2	non local hub	R4	Non-hub kinless nodes	346	144	-0.150563	FIGHT CLUB	0.82679	-1.64452	1	0.790769	25	0.805297	5.37379e-05	0.000576938	yes	UP	no
HAS2	non local hub	R4	Non-hub kinless nodes	494	192	-0.206192	FIGHT CLUB	0.84894	-1.23613	1	1.25551	0	1.30665	2.0847e-05	0.000368648	yes	UP	no
HELZ2	non local hub	R4	Non-hub kinless nodes	416	167	-0.181858	FIGHT CLUB	0.838844	-1.44883	1	0.940814	0	0.956315	0.00121361	0.0032407	yes	UP	no
HERC1	non local hub	R4	Non-hub kinless nodes	471	207	-0.108587	FIGHT CLUB	0.806848	-1.1085	1	0.826452	0	0.795576	0.000152496	0.000994255	yes	UP	no
HGSNAT	non local hub	R4	Non-hub kinless nodes	450	143	-0.343042	FIGHT CLUB	0.899017	-1.65303	1	0.789541	0	0.794108	0.00244931	0.00511985	yes	UP	no
HIBADH	non local hub	R4	Non-hub kinless nodes	419	154	-0.244762	FIGHT CLUB	0.864913	-1.55944	1	0.833471	0	0.909842	0.000456098	0.00177668	yes	UP	no
HIPK2	non local hub	R4	Non-hub kinless nodes	168	57	-0.292931	FIGHT CLUB	0.884885	-2.38473	1	0.82437	0	0.772069	0.00163326	0.00390711	yes	UP	no
HKDC1	non local hub	R4	Non-hub kinless nodes	475	185	-0.203733	FIGHT CLUB	0.84831	-1.29568	1	0.917524	50	0.87807	0.00083389	0.0025483	yes	UP	no
HLA-A	non local hub	R4	Non-hub kinless nodes	376	160	-0.131474	FIGHT CLUB	0.818923	-1.50839	1	1.18603	0	1.03341	0.00146607	0.00365257	yes	UP	yes
HLA-F-AS1	non local hub	R4	Non-hub kinless nodes	419	161	-0.209418	FIGHT CLUB	0.852353	-1.49988	1	0.693053	0	0.723627	0.000133474	0.000920281	yes	UP	no
HNMT	non local hub	R4	Non-hub kinless nodes	343	132	-0.21652	FIGHT CLUB	0.851898	-1.74662	1	1.34385	0	0.969394	2.89525e-05	0.000430001	yes	UP	no
HOMER3	non local hub	R4	Non-hub kinless nodes	307	123	-0.176433	FIGHT CLUB	0.839478	-1.82319	1	0.681449	0	0.82286	0.00191797	0.00434307	yes	UP	no
HPGD	non local hub	R4	Non-hub kinless nodes	233	75	-0.340017	FIGHT CLUB	0.896388	-2.23159	1	3.88837	0	1.82952	0.000229897	0.00124743	yes	UP	no
HSD17B14	non local hub	R4	Non-hub kinless nodes	193	84	-0.119722	FIGHT CLUB	0.810572	-2.15501	1	1.76503	0	0.883638	0.000904273	0.00267247	yes	UP	no
ID2	non local hub	R4	Non-hub kinless nodes	239	105	-0.108303	FIGHT CLUB	0.806989	-1.97634	1	1.5144	0	1.1821	0.000424119	0.00170372	yes	UP	no
IDH3A	non local hub	R4	Non-hub kinless nodes	398	137	-0.28704	FIGHT CLUB	0.881512	-1.70408	1	1.19397	0	1.09949	0.00353363	0.00664348	yes	UP	no
IGF1	non local hub	R4	Non-hub kinless nodes	401	173	-0.121687	FIGHT CLUB	0.813876	-1.39778	1	1.01309	0	1.0066	0.000227518	0.00123863	yes	UP	no
IL17D	non local hub	R4	Non-hub kinless nodes	469	191	-0.167669	FIGHT CLUB	0.834148	-1.24463	1	1.28332	0	1.21884	3.02222e-06	0.000172728	yes	UP	no
ILVBL	non local hub	R4	Non-hub kinless nodes	396	158	-0.18439	FIGHT CLUB	0.840807	-1.5254	1	0.809907	0	0.688617	0.000173785	0.00105263	yes	UP	no
IRAK4	non local hub	R4	Non-hub kinless nodes	256	112	-0.112851	FIGHT CLUB	0.808594	-1.91678	1	0.999039	0	0.748607	2.04423e-05	0.000364516	yes	UP	no
IRF4	non local hub	R4	Non-hub kinless nodes	274	110	-0.184948	FIGHT CLUB	0.83883	-1.9338	1	1.70745	0	1.22848	8.02497e-05	0.000695306	yes	UP	no
JAK2	non local hub	R4	Non-hub kinless nodes	395	131	-0.310729	FIGHT CLUB	0.890011	-1.75513	1	0.709207	0	0.679338	0.000301332	0.0014396	yes	UP	no
KCNAB2	non local hub	R4	Non-hub kinless nodes	436	191	-0.107259	FIGHT CLUB	0.808092	-1.24463	1	1.2133	0	1.09382	3.26372e-05	0.000451956	yes	UP	no
KCNIP2	non local hub	R4	Non-hub kinless nodes	468	192	-0.161343	FIGHT CLUB	0.83169	-1.23613	1	1.69992	0	1.81163	0.000160226	0.00101227	yes	UP	no
KCNIP3	non local hub	R4	Non-hub kinless nodes	501	171	-0.293759	FIGHT CLUB	0.883502	-1.4148	1	2.11602	0	2.25226	0.000230783	0.00125086	yes	UP	no
KCNJ13	non local hub	R4	Non-hub kinless nodes	317	121	-0.225689	FIGHT CLUB	0.854302	-1.84021	1	1.24717	0	1.28712	8.7966e-05	0.000726791	yes	UP	no
KCTD2	non local hub	R4	Non-hub kinless nodes	468	165	-0.270579	FIGHT CLUB	0.875699	-1.46585	1	0.735002	0	0.721227	0.000962453	0.00278811	yes	UP	no
KLHL41	non local hub	R4	Non-hub kinless nodes	290	126	-0.116056	FIGHT CLUB	0.811225	-1.79767	1	0.948954	0	0.950463	0.000491922	0.00185221	yes	UP	no
KRBA2	non local hub	R4	Non-hub kinless nodes	433	172	-0.188344	FIGHT CLUB	0.842209	-1.40629	1	1.23593	0	1.28906	3.60594e-05	0.000480401	yes	UP	no
KRCC1	non local hub	R4	Non-hub kinless nodes	208	89	-0.130112	FIGHT CLUB	0.816915	-2.11247	1	1.58097	0	0.88514	4.36951e-05	0.000538358	yes	UP	yes
LAMB2	non local hub	R4	Non-hub kinless nodes	482	210	-0.11442	FIGHT CLUB	0.810179	-1.08298	1	1.23077	0	1.10155	9.07751e-05	0.000739089	yes	UP	no
LDHD	non local hub	R4	Non-hub kinless nodes	382	155	-0.168841	FIGHT CLUB	0.83536	-1.55093	1	0.92826	8.33333	0.885299	1.40378e-05	0.00031205	yes	UP	no
LGI3	non local hub	R4	Non-hub kinless nodes	169	73	-0.126323	FIGHT CLUB	0.813417	-2.2486	1	3.76865	0	1.51038	0.0015416	0.0037573	yes	UP	no
LIMCH1	non local hub	R4	Non-hub kinless nodes	361	116	-0.334067	FIGHT CLUB	0.896747	-1.88275	1	1.37804	0	1.45598	0.011264	0.0160318	yes	UP	no
LINC00673	non local hub	R4	Non-hub kinless nodes	250	101	-0.181097	FIGHT CLUB	0.836784	-2.01037	1	1.64089	0	1.05386	0.00333795	0.00636022	yes	UP	no
LINC01291	non local hub	R4	Non-hub kinless nodes	187	77	-0.165651	FIGHT CLUB	0.83045	-2.21457	1	2.36317	25	1.05649	0.00647791	0.0103663	yes	UP	no
LINC01594	non local hub	R4	Non-hub kinless nodes	420	159	-0.221546	FIGHT CLUB	0.856684	-1.5169	1	1.30609	0	1.31109	6.68875e-06	0.000234364	yes	UP	no
LOC100128288	non local hub	R4	Non-hub kinless nodes	408	172	-0.139357	FIGHT CLUB	0.82228	-1.40629	1	0.719081	0	0.793641	0.000219193	0.00121073	yes	UP	no
LOC100130370	non local hub	R4	Non-hub kinless nodes	416	160	-0.207919	FIGHT CLUB	0.852071	-1.50839	1	1.15303	0	1.14211	2.37532e-05	0.000395833	yes	UP	no
LOC100419583	non local hub	R4	Non-hub kinless nodes	451	194	-0.125239	FIGHT CLUB	0.814966	-1.21911	1	1.00988	0	1.00389	0.00148772	0.00368033	yes	UP	no
LOC100505912	non local hub	R4	Non-hub kinless nodes	303	110	-0.263021	FIGHT CLUB	0.868205	-1.9338	1	3.21512	0	2.01663	3.6714e-05	0.000486486	yes	UP	no
LOC100506688	non local hub	R4	Non-hub kinless nodes	446	188	-0.140649	FIGHT CLUB	0.822317	-1.27016	1	1.31216	0	1.18423	3.96139e-05	0.000508465	yes	UP	no
LOC653513	non local hub	R4	Non-hub kinless nodes	511	200	-0.202989	FIGHT CLUB	0.846814	-1.16806	1	1.52683	0	1.46127	4.49309e-05	0.000542854	yes	UP	no
LOC728743	non local hub	R4	Non-hub kinless nodes	327	139	-0.130109	FIGHT CLUB	0.81931	-1.68706	1	1.12968	0	0.827282	0.00695338	0.0109385	yes	UP	no
LPIN1	non local hub	R4	Non-hub kinless nodes	399	146	-0.244112	FIGHT CLUB	0.866106	-1.6275	1	0.785858	0	0.914846	0.00214828	0.00465615	yes	UP	no
LRAT	non local hub	R4	Non-hub kinless nodes	327	129	-0.192439	FIGHT CLUB	0.844373	-1.77214	1	1.71367	0	1.58539	8.04905e-05	0.000695306	yes	UP	yes
LRRC39	non local hub	R4	Non-hub kinless nodes	410	182	-0.0965342	FIGHT CLUB	0.802951	-1.32121	1	1.55945	0	1.42043	9.15644e-06	0.000264783	yes	UP	no
LSS	non local hub	R4	Non-hub kinless nodes	164	73	-0.106131	FIGHT CLUB	0.801866	-2.2486	1	0.819269	0	0.832061	0.00213798	0.00464235	yes	UP	no
MAF	non local hub	R4	Non-hub kinless nodes	473	163	-0.288989	FIGHT CLUB	0.881245	-1.48286	1	1.41279	0	1.40431	7.49387e-05	0.000673489	yes	UP	yes
MAN2B2	non local hub	R4	Non-hub kinless nodes	396	127	-0.331684	FIGHT CLUB	0.897147	-1.78916	1	0.798994	0	0.814769	0.00159247	0.00385076	yes	UP	no
MAP3K11	non local hub	R4	Non-hub kinless nodes	412	163	-0.191292	FIGHT CLUB	0.843476	-1.48286	1	0.872409	0	0.781297	7.5191e-06	0.000246713	yes	UP	no
MAP3K3	non local hub	R4	Non-hub kinless nodes	352	148	-0.139207	FIGHT CLUB	0.823218	-1.61049	1	0.718084	0	0.792533	0.000359995	0.0015717	yes	UP	no
MAP7	non local hub	R4	Non-hub kinless nodes	153	67	-0.127101	FIGHT CLUB	0.808236	-2.29965	1	2.48927	0	0.885638	0.00455147	0.00801398	yes	UP	no
MAPT	non local hub	R4	Non-hub kinless nodes	353	146	-0.15458	FIGHT CLUB	0.828937	-1.6275	1	0.6883	0	0.719435	2.47871e-05	0.000409648	yes	UP	no
MBP	non local hub	R4	Non-hub kinless nodes	260	107	-0.15833	FIGHT CLUB	0.830636	-1.95932	1	2.20051	0	1.2347	0.0157507	0.0211385	yes	UP	no
MCC	non local hub	R4	Non-hub kinless nodes	402	151	-0.232012	FIGHT CLUB	0.858908	-1.58496	1	0.827659	0	0.825184	1.24035e-06	0.00011956	yes	UP	no
MCF2L	non local hub	R4	Non-hub kinless nodes	319	115	-0.263083	FIGHT CLUB	0.870039	-1.89126	1	1.17865	0	1.20293	0.00122391	0.00325757	yes	UP	no
MDGA2	non local hub	R4	Non-hub kinless nodes	262	101	-0.203898	FIGHT CLUB	0.851393	-2.01037	1	1.03309	0	0.943255	0.000661255	0.00221138	yes	UP	no
MEIS3	non local hub	R4	Non-hub kinless nodes	297	105	-0.268383	FIGHT CLUB	0.875013	-1.97634	1	0.606153	0	0.754439	0.0105101	0.0151607	yes	UP	yes
METRNL	non local hub	R4	Non-hub kinless nodes	338	144	-0.129368	FIGHT CLUB	0.818494	-1.64452	1	1.05524	0	0.765144	0.00281146	0.00562171	yes	UP	no
MGST3	non local hub	R4	Non-hub kinless nodes	429	181	-0.142045	FIGHT CLUB	0.821991	-1.32972	1	0.769658	0	0.820232	0.00130735	0.00338796	yes	UP	no
MICAL1	non local hub	R4	Non-hub kinless nodes	199	70	-0.290419	FIGHT CLUB	0.876266	-2.27413	1	2.72524	0	0.978949	8.29772e-05	0.00070508	yes	UP	no
MIR22HG	non local hub	R4	Non-hub kinless nodes	446	143	-0.327632	FIGHT CLUB	0.897198	-1.65303	1	0.918969	0	0.888968	0.000382976	0.0016264	yes	UP	no
MLIP	non local hub	R4	Non-hub kinless nodes	386	136	-0.275537	FIGHT CLUB	0.875862	-1.71259	1	1.971	0	1.67872	0.000279203	0.00138671	yes	UP	no
MLPH	non local hub	R4	Non-hub kinless nodes	349	133	-0.218782	FIGHT CLUB	0.854771	-1.73811	1	1.46256	0	1.28346	0.0003322	0.00150625	yes	UP	no
MPC1	non local hub	R4	Non-hub kinless nodes	469	187	-0.183515	FIGHT CLUB	0.841022	-1.27867	1	1.06269	0	1.12498	1.86126e-05	0.000349833	yes	UP	no
MROH1	non local hub	R4	Non-hub kinless nodes	306	135	-0.102278	FIGHT CLUB	0.805363	-1.72109	1	0.690761	0	0.785325	0.000530532	0.00193192	yes	UP	no
MTURN	non local hub	R4	Non-hub kinless nodes	458	170	-0.239069	FIGHT CLUB	0.862226	-1.42331	1	1.32083	0	1.30515	3.8793e-07	9.78911e-05	yes	UP	no
MVP	non local hub	R4	Non-hub kinless nodes	157	63	-0.183691	FIGHT CLUB	0.838979	-2.33369	1	1.9614	0	0.772112	0.0341043	0.0412846	yes	UP	yes
MXD4	non local hub	R4	Non-hub kinless nodes	472	173	-0.244135	FIGHT CLUB	0.865659	-1.39778	1	1.42046	0	1.38525	1.1073e-05	0.000288015	yes	UP	yes
MYCBP2	non local hub	R4	Non-hub kinless nodes	406	167	-0.162001	FIGHT CLUB	0.830808	-1.44883	1	0.81227	0	0.869064	0.00065262	0.00219896	yes	UP	no
MYO5A	non local hub	R4	Non-hub kinless nodes	410	144	-0.275308	FIGHT CLUB	0.876645	-1.64452	1	0.817837	0	0.862638	0.000300567	0.00143734	yes	UP	no
NAP1L5	non local hub	R4	Non-hub kinless nodes	255	94	-0.249051	FIGHT CLUB	0.864114	-2.06993	1	2.51809	0	1.26674	3.33333e-05	0.000459009	yes	UP	no
NAV1	non local hub	R4	Non-hub kinless nodes	393	155	-0.190368	FIGHT CLUB	0.844447	-1.55093	1	0.98719	0	1.02441	2.32156e-05	0.000391907	yes	UP	no
NCALD	non local hub	R4	Non-hub kinless nodes	397	151	-0.219623	FIGHT CLUB	0.855332	-1.58496	1	0.856689	0	0.858764	4.09164e-06	0.000199153	yes	UP	no
NCOA4	non local hub	R4	Non-hub kinless nodes	345	138	-0.184511	FIGHT CLUB	0.84	-1.69557	1	1.29237	0	0.980099	0.00176482	0.00410789	yes	UP	no
NDRG2	non local hub	R4	Non-hub kinless nodes	488	188	-0.21393	FIGHT CLUB	0.851586	-1.27016	1	1.39074	0	1.29314	0.000196638	0.00112273	yes	UP	no
NDUFA8	non local hub	R4	Non-hub kinless nodes	333	119	-0.258292	FIGHT CLUB	0.872296	-1.85723	1	0.703487	0	0.729793	0.00860816	0.0129531	yes	UP	no
NECAB2	non local hub	R4	Non-hub kinless nodes	216	74	-0.280165	FIGHT CLUB	0.88263	-2.24009	1	0.735902	0	0.810399	6.28027e-05	0.000623656	yes	UP	no
NEFL	non local hub	R4	Non-hub kinless nodes	214	77	-0.261675	FIGHT CLUB	0.870535	-2.21457	1	1.52172	0	0.893126	0.0236188	0.02981	yes	UP	no
NIPSNAP3A	non local hub	R4	Non-hub kinless nodes	463	143	-0.353084	FIGHT CLUB	0.904608	-1.65303	1	0.79569	0	0.816994	9.99329e-05	0.000778558	yes	UP	no
NNT	non local hub	R4	Non-hub kinless nodes	505	167	-0.315226	FIGHT CLUB	0.890642	-1.44883	1	1.31282	0	1.36054	0.000676637	0.00223996	yes	UP	no
NPY6R	non local hub	R4	Non-hub kinless nodes	328	132	-0.180725	FIGHT CLUB	0.838043	-1.74662	1	1.30116	0	1.18514	2.45484e-07	9.78911e-05	yes	UP	no
NRSN2-AS1	non local hub	R4	Non-hub kinless nodes	480	184	-0.220039	FIGHT CLUB	0.853056	-1.30419	1	0.825993	0	0.858987	0.000155494	0.00100054	yes	UP	no
NUCB1	non local hub	R4	Non-hub kinless nodes	468	156	-0.307052	FIGHT CLUB	0.888889	-1.54242	1	0.767936	0	0.803335	0.00227748	0.0048489	yes	UP	no
NUDT14	non local hub	R4	Non-hub kinless nodes	329	116	-0.268863	FIGHT CLUB	0.875685	-1.88275	1	0.682083	0	0.740461	0.000395737	0.00164311	yes	UP	no
NXPH4	non local hub	R4	Non-hub kinless nodes	254	96	-0.224298	FIGHT CLUB	0.857152	-2.05291	1	0.682442	0	0.811006	0.0193313	0.0250781	yes	UP	no
OCA2	non local hub	R4	Non-hub kinless nodes	379	132	-0.285265	FIGHT CLUB	0.878698	-1.74662	1	1.8103	0	1.85563	0.00119256	0.00320537	yes	UP	no
OGDH	non local hub	R4	Non-hub kinless nodes	485	159	-0.319957	FIGHT CLUB	0.892524	-1.5169	1	1.36089	0	1.38068	0.000740352	0.00235723	yes	UP	no
OPTN	non local hub	R4	Non-hub kinless nodes	355	135	-0.218581	FIGHT CLUB	0.855386	-1.72109	1	1.10325	0	1.1569	4.48846e-05	0.000542854	yes	UP	no
OR7A5	non local hub	R4	Non-hub kinless nodes	283	120	-0.133435	FIGHT CLUB	0.8202	-1.84872	1	1.19128	0	0.712693	0.0107335	0.0154217	yes	UP	no
OSBPL1A	non local hub	R4	Non-hub kinless nodes	478	197	-0.162979	FIGHT CLUB	0.830146	-1.19358	1	0.769141	0	0.777823	1.33307e-05	0.000306215	yes	UP	no
OTUD7B	non local hub	R4	Non-hub kinless nodes	431	152	-0.277832	FIGHT CLUB	0.875625	-1.57645	1	0.771233	0	0.800245	0.00228229	0.00485493	yes	UP	no
PARP8	non local hub	R4	Non-hub kinless nodes	232	65	-0.400401	FIGHT CLUB	0.921503	-2.31667	1	0.658055	0	0.714177	0.0334672	0.0405833	yes	UP	no
PARVA	non local hub	R4	Non-hub kinless nodes	412	174	-0.145296	FIGHT CLUB	0.821637	-1.38927	1	0.723333	0	0.720374	0.00352792	0.0066373	yes	UP	no
PBRM1	non local hub	R4	Non-hub kinless nodes	278	119	-0.128049	FIGHT CLUB	0.816767	-1.85723	1	2.02257	0	1.53524	0.0218528	0.0278384	yes	UP	no
PC	non local hub	R4	Non-hub kinless nodes	493	189	-0.212165	FIGHT CLUB	0.85303	-1.26165	1	1.09688	0	1.06984	0.000232789	0.00125824	yes	UP	no
PCMTD1	non local hub	R4	Non-hub kinless nodes	264	113	-0.12602	FIGHT CLUB	0.81679	-1.90827	1	0.616475	0	0.700784	0.000873928	0.00262445	yes	UP	no
PCYT2	non local hub	R4	Non-hub kinless nodes	284	118	-0.158254	FIGHT CLUB	0.827366	-1.86573	1	1.14865	0	0.906996	3.52524e-06	0.000177308	yes	UP	no
PDE4DIP	non local hub	R4	Non-hub kinless nodes	384	167	-0.114393	FIGHT CLUB	0.810866	-1.44883	1	0.791034	0	0.813472	0.00247029	0.00514574	yes	UP	no
PDE6D	non local hub	R4	Non-hub kinless nodes	388	158	-0.165554	FIGHT CLUB	0.834175	-1.5254	1	0.769363	0	0.819187	1.94138e-05	0.000350877	yes	UP	no
PDHA1	non local hub	R4	Non-hub kinless nodes	426	155	-0.255658	FIGHT CLUB	0.867613	-1.55093	1	0.91596	0	0.881917	0.00413931	0.00746474	yes	UP	no
PEBP1	non local hub	R4	Non-hub kinless nodes	345	135	-0.200825	FIGHT CLUB	0.846881	-1.72109	1	0.766545	0	0.837218	9.146e-07	0.000102186	yes	UP	no
PER3	non local hub	R4	Non-hub kinless nodes	143	50	-0.270563	FIGHT CLUB	0.877745	-2.44429	1	0.937118	0	0.917874	0.00379657	0.00701125	yes	UP	no
PFKM	non local hub	R4	Non-hub kinless nodes	389	135	-0.285172	FIGHT CLUB	0.879561	-1.72109	1	0.710514	0	0.806682	0.00699231	0.0109822	yes	UP	no
PGM1	non local hub	R4	Non-hub kinless nodes	420	178	-0.139945	FIGHT CLUB	0.820385	-1.35524	1	0.664723	0	0.683319	0.00470318	0.00819459	yes	UP	no
PIK3R3	non local hub	R4	Non-hub kinless nodes	298	125	-0.151825	FIGHT CLUB	0.824051	-1.80618	1	1.3952	0	1.09347	3.31462e-06	0.000177116	yes	UP	no
PINK1	non local hub	R4	Non-hub kinless nodes	433	184	-0.140166	FIGHT CLUB	0.819424	-1.30419	1	0.88419	0	0.943136	0.0017313	0.00405676	yes	UP	no
PLP1	non local hub	R4	Non-hub kinless nodes	418	156	-0.235065	FIGHT CLUB	0.860717	-1.54242	1	1.70719	0	1.68126	9.04616e-07	0.000102186	yes	UP	yes
PLXNC1	non local hub	R4	Non-hub kinless nodes	190	66	-0.27815	FIGHT CLUB	0.879335	-2.30816	1	0.730723	0	0.760947	0.00258246	0.00529251	yes	UP	no
PMEL	non local hub	R4	Non-hub kinless nodes	394	166	-0.142444	FIGHT CLUB	0.82249	-1.45734	1	1.05983	0	1.07119	6.16446e-06	0.000228447	yes	UP	no
PNMA1	non local hub	R4	Non-hub kinless nodes	411	153	-0.238813	FIGHT CLUB	0.86142	-1.56795	1	0.671806	0	0.703003	0.00160569	0.00386751	yes	UP	no
PNRC1	non local hub	R4	Non-hub kinless nodes	252	109	-0.117153	FIGHT CLUB	0.812909	-1.94231	1	1.09177	0	0.887882	0.000306734	0.00144574	yes	UP	no
POLD4	non local hub	R4	Non-hub kinless nodes	324	141	-0.117889	FIGHT CLUB	0.810614	-1.67004	1	0.624567	0	0.76757	0.00143585	0.00360134	yes	UP	no
PPARGC1A	non local hub	R4	Non-hub kinless nodes	488	193	-0.192938	FIGHT CLUB	0.843586	-1.22762	1	1.28528	0	1.25967	3.43053e-07	9.78911e-05	yes	UP	no
PRADC1	non local hub	R4	Non-hub kinless nodes	415	160	-0.204864	FIGHT CLUB	0.851357	-1.50839	1	1.26185	0	1.29515	1.69701e-05	0.000332719	yes	UP	no
PRDM7	non local hub	R4	Non-hub kinless nodes	355	141	-0.186829	FIGHT CLUB	0.842246	-1.67004	1	2.95565	0	2.06154	0.000138714	0.000949259	yes	UP	no
PRKCE	non local hub	R4	Non-hub kinless nodes	350	150	-0.127593	FIGHT CLUB	0.816327	-1.59347	1	0.674943	0	0.694721	1.61437e-05	0.000331078	yes	UP	no
PRUNE2	non local hub	R4	Non-hub kinless nodes	363	133	-0.248298	FIGHT CLUB	0.865757	-1.73811	1	2.68058	0	2.53935	9.01689e-05	0.000736329	yes	UP	no
PSMB10	non local hub	R4	Non-hub kinless nodes	401	160	-0.185788	FIGHT CLUB	0.840797	-1.50839	1	1.0659	0	1.01903	0.0059832	0.00977769	yes	UP	no
PTP4A3	non local hub	R4	Non-hub kinless nodes	406	165	-0.170027	FIGHT CLUB	0.834836	-1.46585	1	0.682251	0	0.68367	7.88394e-06	0.000248033	yes	UP	no
PTTG1IP	non local hub	R4	Non-hub kinless nodes	391	155	-0.188351	FIGHT CLUB	0.842852	-1.55093	1	0.918849	0	0.873911	9.43857e-06	0.000269767	yes	UP	no
PYGL	non local hub	R4	Non-hub kinless nodes	325	135	-0.153248	FIGHT CLUB	0.827456	-1.72109	1	0.917707	0	0.707162	0.00309749	0.00603299	yes	UP	no
RAB27A	non local hub	R4	Non-hub kinless nodes	365	136	-0.238312	FIGHT CLUB	0.861167	-1.71259	1	1.36858	0	1.077	2.00744e-08	3.28953e-05	yes	UP	no
RAB32	non local hub	R4	Non-hub kinless nodes	361	147	-0.168378	FIGHT CLUB	0.834186	-1.61899	1	1.40717	0	1.10206	0.00131477	0.00340359	yes	UP	no
RAB3A	non local hub	R4	Non-hub kinless nodes	248	107	-0.117294	FIGHT CLUB	0.81385	-1.95932	1	1.68118	0	0.909131	0.0206048	0.0264749	yes	UP	no
RAB5B	non local hub	R4	Non-hub kinless nodes	324	131	-0.171896	FIGHT CLUB	0.836525	-1.75513	1	1.03036	0	1.05197	0.000192708	0.00111584	yes	UP	no
RABGAP1L	non local hub	R4	Non-hub kinless nodes	183	56	-0.354032	FIGHT CLUB	0.906357	-2.39324	1	1.11947	0	0.825398	0.00448862	0.00793742	yes	UP	no
RAPGEF1	non local hub	R4	Non-hub kinless nodes	391	156	-0.180965	FIGHT CLUB	0.840817	-1.54242	1	0.97362	0	0.96029	1.15887e-05	0.000292574	yes	UP	no
RBPMS2	non local hub	R4	Non-hub kinless nodes	139	60	-0.127591	FIGHT CLUB	0.813674	-2.35921	1	2.08629	0	0.700659	0.0168921	0.0224134	yes	UP	no
RCBTB2	non local hub	R4	Non-hub kinless nodes	368	164	-0.0940516	FIGHT CLUB	0.801394	-1.47436	1	0.970978	0	0.905716	0.001507	0.00370421	yes	UP	no
RETSAT	non local hub	R4	Non-hub kinless nodes	427	149	-0.283363	FIGHT CLUB	0.878237	-1.60198	1	0.749248	0	0.871333	0.000854855	0.00258783	yes	UP	no
RHOBTB1	non local hub	R4	Non-hub kinless nodes	457	188	-0.161121	FIGHT CLUB	0.830768	-1.27016	1	1.54332	0	1.51041	5.35429e-07	9.78911e-05	yes	UP	no
RNASEL	non local hub	R4	Non-hub kinless nodes	408	144	-0.272794	FIGHT CLUB	0.875433	-1.64452	1	0.9795	0	0.935142	0.000112015	0.000821858	yes	UP	no
RNF14	non local hub	R4	Non-hub kinless nodes	325	93	-0.393723	FIGHT CLUB	0.918116	-2.07844	1	0.972277	0	0.870689	0.0115343	0.0163079	yes	UP	no
RNF144B	non local hub	R4	Non-hub kinless nodes	323	117	-0.264085	FIGHT CLUB	0.86879	-1.87424	1	1.46378	0	0.99621	4.05006e-06	0.000199101	yes	UP	no
ROBO2	non local hub	R4	Non-hub kinless nodes	472	182	-0.209844	FIGHT CLUB	0.851318	-1.32121	1	1.14002	0	1.15315	4.38685e-07	9.78911e-05	yes	UP	no
RORB	non local hub	R4	Non-hub kinless nodes	167	62	-0.261158	FIGHT CLUB	0.862168	-2.34219	1	3.66299	0	1.07821	0.0164263	0.0218958	yes	UP	no
RPS6KC1	non local hub	R4	Non-hub kinless nodes	492	201	-0.168818	FIGHT CLUB	0.833098	-1.15955	1	0.902611	0	0.894387	2.56682e-06	0.000168185	yes	UP	no
RRAGB	non local hub	R4	Non-hub kinless nodes	111	18	-0.599529	FIGHT CLUB	0.973703	-2.71656	1	0.778863	0	0.797894	0.00937849	0.0137831	yes	UP	no
RRAGC	non local hub	R4	Non-hub kinless nodes	503	210	-0.151044	FIGHT CLUB	0.825698	-1.08298	1	0.717228	0	0.756732	0.000154173	0.000995824	yes	UP	no
RRAGD	non local hub	R4	Non-hub kinless nodes	510	183	-0.262837	FIGHT CLUB	0.871246	-1.3127	1	0.90231	0	0.900097	0.000388015	0.00163425	yes	UP	no
SCPEP1	non local hub	R4	Non-hub kinless nodes	322	130	-0.174428	FIGHT CLUB	0.837005	-1.76363	1	0.747467	0	0.81857	8.97919e-05	0.000734471	yes	UP	yes
SEMA3C	non local hub	R4	Non-hub kinless nodes	401	150	-0.236015	FIGHT CLUB	0.860075	-1.59347	1	1.66959	0	1.45369	5.91382e-06	0.000228447	yes	UP	yes
SEMA6A	non local hub	R4	Non-hub kinless nodes	199	80	-0.178676	FIGHT CLUB	0.838388	-2.18905	1	1.37882	0	1.38151	0.00155751	0.00378858	yes	UP	no
SERPINB6	non local hub	R4	Non-hub kinless nodes	246	80	-0.32262	FIGHT CLUB	0.894243	-2.18905	1	0.832762	0	0.721497	0.0403903	0.0481588	yes	UP	no
SERPINF1	non local hub	R4	Non-hub kinless nodes	264	89	-0.305624	FIGHT CLUB	0.886349	-2.11247	1	1.55376	0	1.37675	0.00303745	0.0059538	yes	UP	no
SERPINI1	non local hub	R4	Non-hub kinless nodes	454	196	-0.121765	FIGHT CLUB	0.81362	-1.20209	1	1.82894	0	1.81613	0.00157897	0.00382565	yes	UP	no
SFXN3	non local hub	R4	Non-hub kinless nodes	355	145	-0.167494	FIGHT CLUB	0.833168	-1.63601	1	0.878554	0	0.862254	0.000887265	0.00264512	yes	UP	yes
SGCD	non local hub	R4	Non-hub kinless nodes	278	117	-0.144874	FIGHT CLUB	0.822874	-1.87424	1	0.907221	0	0.732423	5.10473e-05	0.000567934	yes	UP	no
SH3BP4	non local hub	R4	Non-hub kinless nodes	477	199	-0.150332	FIGHT CLUB	0.825952	-1.17657	1	0.813035	0	0.827209	0.000108509	0.000805787	yes	UP	no
SIAE	non local hub	R4	Non-hub kinless nodes	461	165	-0.264984	FIGHT CLUB	0.871895	-1.46585	1	1.17651	0	1.29815	0.00106143	0.00297322	yes	UP	yes
SIRPA	non local hub	R4	Non-hub kinless nodes	362	129	-0.273703	FIGHT CLUB	0.873012	-1.77214	1	0.649052	0	0.696034	0.00667769	0.0106066	yes	UP	no
SIRT2	non local hub	R4	Non-hub kinless nodes	480	183	-0.217778	FIGHT CLUB	0.854648	-1.3127	1	0.917726	0	0.966017	9.89968e-05	0.00077278	yes	UP	no
SLC16A7	non local hub	R4	Non-hub kinless nodes	407	148	-0.250697	FIGHT CLUB	0.867769	-1.61049	1	0.945361	0	0.903246	6.6245e-05	0.0006371	yes	UP	no
SLC25A16	non local hub	R4	Non-hub kinless nodes	503	194	-0.210467	FIGHT CLUB	0.851246	-1.21911	1	1.69655	0	1.67402	1.10458e-05	0.000288015	yes	UP	no
SLC25A23	non local hub	R4	Non-hub kinless nodes	443	183	-0.163389	FIGHT CLUB	0.829355	-1.3127	1	0.889079	0	0.832172	2.5745e-05	0.000413603	yes	UP	no
SLC30A4	non local hub	R4	Non-hub kinless nodes	334	116	-0.28529	FIGHT CLUB	0.879379	-1.88275	1	1.00016	0	1.00373	0.0139426	0.0190712	yes	UP	yes
SLC35D2	non local hub	R4	Non-hub kinless nodes	217	69	-0.334506	FIGHT CLUB	0.898894	-2.28264	1	1.01172	0	1.13961	0.0415784	0.0494434	yes	UP	no
SLC3A2	non local hub	R4	Non-hub kinless nodes	491	204	-0.153385	FIGHT CLUB	0.827378	-1.13403	1	1.10685	0	1.13068	4.57183e-05	0.000543077	yes	UP	no
SLC45A2	non local hub	R4	Non-hub kinless nodes	298	107	-0.26995	FIGHT CLUB	0.871076	-1.95932	1	1.29555	0	0.871565	4.65718e-05	0.000546669	yes	UP	no
SLC46A3	non local hub	R4	Non-hub kinless nodes	508	176	-0.28421	FIGHT CLUB	0.879968	-1.37226	1	1.1041	0	1.19092	0.000266225	0.0013437	yes	UP	yes
SLC6A15	non local hub	R4	Non-hub kinless nodes	271	89	-0.327616	FIGHT CLUB	0.892145	-2.11247	1	1.62464	0	0.923967	0.000414206	0.00168284	yes	UP	no
SLC6A8	non local hub	R4	Non-hub kinless nodes	518	177	-0.293763	FIGHT CLUB	0.883242	-1.36375	1	1.20863	0	1.25054	9.82092e-05	0.00077124	yes	UP	no
SLC7A4	non local hub	R4	Non-hub kinless nodes	448	184	-0.166373	FIGHT CLUB	0.831314	-1.30419	1	1.53838	0	1.49653	0.00245194	0.00512053	yes	UP	no
SLC7A5	non local hub	R4	Non-hub kinless nodes	458	180	-0.198864	FIGHT CLUB	0.845541	-1.33822	1	1.83601	0	1.76597	3.16559e-06	0.000173112	yes	UP	no
SMIM14	non local hub	R4	Non-hub kinless nodes	466	155	-0.311856	FIGHT CLUB	0.889365	-1.55093	1	0.907762	0	0.983766	0.00220337	0.00473004	yes	UP	no
SMPD1	non local hub	R4	Non-hub kinless nodes	404	146	-0.257673	FIGHT CLUB	0.8694	-1.6275	1	1.1777	0	1.19167	0.000130801	0.000910792	yes	UP	yes
SNCB	non local hub	R4	Non-hub kinless nodes	385	151	-0.199068	FIGHT CLUB	0.846173	-1.58496	1	2.04218	0	1.7216	2.63284e-05	0.000414841	yes	UP	no
SNTA1	non local hub	R4	Non-hub kinless nodes	279	103	-0.240824	FIGHT CLUB	0.863709	-1.99336	1	0.883294	0	0.697471	0.00692766	0.010912	yes	UP	no
SOCS6	non local hub	R4	Non-hub kinless nodes	456	190	-0.153175	FIGHT CLUB	0.826389	-1.25314	1	1.30094	0	1.24586	0.00086661	0.00261219	yes	UP	no
SPEF2	non local hub	R4	Non-hub kinless nodes	258	103	-0.183354	FIGHT CLUB	0.84062	-1.99336	1	2.51581	0	1.39287	0.0138782	0.0190096	yes	UP	no
SPP1	non local hub	R4	Non-hub kinless nodes	199	83	-0.152992	FIGHT CLUB	0.82604	-2.16352	1	3.7989	0	1.75961	0.000561661	0.00199503	yes	UP	yes
SRRM3	non local hub	R4	Non-hub kinless nodes	261	104	-0.186939	FIGHT CLUB	0.841224	-1.98485	1	1.17594	0	0.84375	0.00271025	0.00547619	yes	UP	no
ST6GALNAC1	non local hub	R4	Non-hub kinless nodes	404	180	-0.0926619	FIGHT CLUB	0.80149	-1.33822	1	1.40184	0	1.12914	0.000320779	0.00147793	yes	UP	no
ST6GALNAC2	non local hub	R4	Non-hub kinless nodes	443	169	-0.215852	FIGHT CLUB	0.854466	-1.43181	1	1.67141	0	1.89949	1.67951e-05	0.000332719	yes	UP	no
ST7	non local hub	R4	Non-hub kinless nodes	471	158	-0.307625	FIGHT CLUB	0.887469	-1.5254	1	1.16983	0	1.12867	0.000102568	0.000782961	yes	UP	no
ST8SIA6	non local hub	R4	Non-hub kinless nodes	498	205	-0.160159	FIGHT CLUB	0.830547	-1.12552	1	0.85784	0	0.859552	1.6281e-05	0.000331078	yes	UP	no
STK32A	non local hub	R4	Non-hub kinless nodes	393	152	-0.20872	FIGHT CLUB	0.85041	-1.57645	1	1.23489	0	1.30386	1.36612e-05	0.00030666	yes	UP	no
STXBP1	non local hub	R4	Non-hub kinless nodes	290	111	-0.22146	FIGHT CLUB	0.853496	-1.92529	1	1.78212	0	1.01511	0.000108838	0.000807008	yes	UP	yes
SYNGR1	non local hub	R4	Non-hub kinless nodes	174	71	-0.169832	FIGHT CLUB	0.833498	-2.26562	1	1.5926	0	0.724219	0.0213974	0.0273251	yes	UP	no
SYT13	non local hub	R4	Non-hub kinless nodes	300	112	-0.237425	FIGHT CLUB	0.860622	-1.91678	1	1.11206	0	0.853308	0.00105398	0.00296078	yes	UP	no
TACC1	non local hub	R4	Non-hub kinless nodes	398	159	-0.18644	FIGHT CLUB	0.840402	-1.5169	1	0.809943	0	0.815671	3.05241e-05	0.000438138	yes	UP	no
TCN2	non local hub	R4	Non-hub kinless nodes	216	88	-0.167471	FIGHT CLUB	0.834019	-2.12098	1	2.60858	0	1.09969	0.0213331	0.0272682	yes	UP	no
TECPR2	non local hub	R4	Non-hub kinless nodes	458	178	-0.203474	FIGHT CLUB	0.848954	-1.35524	1	1.1581	0	1.21248	2.13886e-05	0.000374187	yes	UP	no
TEX41	non local hub	R4	Non-hub kinless nodes	487	193	-0.191834	FIGHT CLUB	0.842943	-1.22762	1	1.27149	0	1.22675	0.000396887	0.00164515	yes	UP	no
TFAP2A	non local hub	R4	Non-hub kinless nodes	506	205	-0.175573	FIGHT CLUB	0.835863	-1.12552	1	1.31991	0	1.26975	8.17049e-05	0.000699758	yes	UP	yes
TFAP2A-AS1	non local hub	R4	Non-hub kinless nodes	482	199	-0.158069	FIGHT CLUB	0.829544	-1.17657	1	1.76335	0	1.86376	0.000530002	0.00193142	yes	UP	no
TFEB	non local hub	R4	Non-hub kinless nodes	154	45	-0.390693	FIGHT CLUB	0.914615	-2.48683	1	1.98269	0	0.770908	0.0257275	0.0320518	yes	UP	no
THRA	non local hub	R4	Non-hub kinless nodes	477	205	-0.124614	FIGHT CLUB	0.815298	-1.12552	1	1.08194	0	0.997615	0.0011557	0.00314585	yes	UP	no
TMCC3	non local hub	R4	Non-hub kinless nodes	215	95	-0.112903	FIGHT CLUB	0.804759	-2.06142	1	0.929854	0	0.865385	0.000502497	0.00187568	yes	UP	no
TMEM117	non local hub	R4	Non-hub kinless nodes	427	151	-0.2683	FIGHT CLUB	0.874946	-1.58496	1	1.16768	0	1.05356	0.000129568	0.00090532	yes	UP	no
TMEM150C	non local hub	R4	Non-hub kinless nodes	290	122	-0.142358	FIGHT CLUB	0.82302	-1.8317	1	0.902563	0	0.834035	1.89575e-05	0.000350307	yes	UP	no
TMEM51	non local hub	R4	Non-hub kinless nodes	329	123	-0.235814	FIGHT CLUB	0.860229	-1.82319	1	0.912038	0	0.89215	0.000690866	0.00226938	yes	UP	no
TMEM54	non local hub	R4	Non-hub kinless nodes	311	101	-0.325492	FIGHT CLUB	0.894532	-2.01037	1	0.841889	0	0.90604	0.0164016	0.0218688	yes	UP	no
TMEM86A	non local hub	R4	Non-hub kinless nodes	475	172	-0.252624	FIGHT CLUB	0.86888	-1.40629	1	0.911226	0	1.01055	1.30716e-05	0.000306215	yes	UP	no
TNKS	non local hub	R4	Non-hub kinless nodes	408	165	-0.170223	FIGHT CLUB	0.836451	-1.46585	1	0.788005	0	0.726536	3.15685e-05	0.000443444	yes	UP	no
TOB1	non local hub	R4	Non-hub kinless nodes	365	125	-0.285116	FIGHT CLUB	0.882717	-1.80618	1	0.738069	0	0.693671	0.00127436	0.00332878	yes	UP	no
TOLLIP	non local hub	R4	Non-hub kinless nodes	462	162	-0.272682	FIGHT CLUB	0.877045	-1.49137	1	0.681718	0	0.72286	0.000790166	0.00245325	yes	UP	no
TOM1L2	non local hub	R4	Non-hub kinless nodes	435	159	-0.249313	FIGHT CLUB	0.866397	-1.5169	1	0.913967	0	0.940336	0.000772555	0.00241749	yes	UP	no
TP53INP2	non local hub	R4	Non-hub kinless nodes	503	197	-0.200927	FIGHT CLUB	0.84661	-1.19358	1	2.6593	0	2.74024	0.000725713	0.00233241	yes	UP	yes
TP53TG1	non local hub	R4	Non-hub kinless nodes	228	99	-0.114227	FIGHT CLUB	0.811461	-2.02739	1	0.828078	0	0.783617	0.000420606	0.00169762	yes	UP	no
TPP1	non local hub	R4	Non-hub kinless nodes	289	122	-0.141402	FIGHT CLUB	0.821793	-1.8317	1	0.8004	0	0.76307	5.46615e-05	0.000580072	yes	UP	no
TRIM63	non local hub	R4	Non-hub kinless nodes	420	164	-0.199503	FIGHT CLUB	0.847528	-1.47436	1	1.21229	0	1.20266	7.28778e-07	9.80236e-05	yes	UP	no
TRPM1	non local hub	R4	Non-hub kinless nodes	342	129	-0.22287	FIGHT CLUB	0.857725	-1.77214	1	1.33359	0	1.21951	0.000416046	0.00168475	yes	UP	no
TSPAN10	non local hub	R4	Non-hub kinless nodes	419	158	-0.224981	FIGHT CLUB	0.857804	-1.5254	1	2.1119	0	2.12242	3.54698e-05	0.000477541	yes	UP	no
TSPAN15	non local hub	R4	Non-hub kinless nodes	369	146	-0.189799	FIGHT CLUB	0.84345	-1.6275	1	1.845	0	1.67331	2.66958e-05	0.000416623	yes	UP	no
TTC39A	non local hub	R4	Non-hub kinless nodes	120	39	-0.329661	FIGHT CLUB	0.894375	-2.53788	1	5.95214	0	0.80223	0.00470529	0.00819459	yes	UP	no
TTLL1	non local hub	R4	Non-hub kinless nodes	440	177	-0.179307	FIGHT CLUB	0.838177	-1.36375	1	0.947557	0	0.903168	0.000373868	0.00160841	yes	UP	no
TUBA1A	non local hub	R4	Non-hub kinless nodes	462	151	-0.320929	FIGHT CLUB	0.893176	-1.58496	1	0.814164	0	0.757324	0.00011355	0.00082944	yes	UP	yes
TUBB4A	non local hub	R4	Non-hub kinless nodes	302	124	-0.160105	FIGHT CLUB	0.831411	-1.81468	1	0.860213	0	0.69674	0.00315647	0.00612119	yes	UP	no
TYRP1	non local hub	R4	Non-hub kinless nodes	292	96	-0.323568	FIGHT CLUB	0.891912	-2.05291	1	2.41906	0	2.26527	0.00188523	0.00430509	yes	UP	no
UAP1L1	non local hub	R4	Non-hub kinless nodes	387	152	-0.198955	FIGHT CLUB	0.845736	-1.57645	1	0.942458	0	0.806894	3.12635e-05	0.000443444	yes	UP	no
UBAP1L	non local hub	R4	Non-hub kinless nodes	408	150	-0.245687	FIGHT CLUB	0.864836	-1.59347	1	1.21525	0	1.21805	0.00084191	0.00256749	yes	UP	no
UQCRB	non local hub	R4	Non-hub kinless nodes	422	129	-0.358423	FIGHT CLUB	0.906555	-1.77214	1	0.698321	0	0.726338	0.0001422	0.000960238	yes	UP	no
UST	non local hub	R4	Non-hub kinless nodes	430	170	-0.191487	FIGHT CLUB	0.843699	-1.42331	1	0.72584	0	0.718868	3.92935e-07	9.78911e-05	yes	UP	no
VAT1	non local hub	R4	Non-hub kinless nodes	483	172	-0.265298	FIGHT CLUB	0.873187	-1.40629	1	0.977538	0	0.963063	0.00148375	0.00367461	yes	UP	no
VEGFB	non local hub	R4	Non-hub kinless nodes	479	192	-0.180042	FIGHT CLUB	0.839331	-1.23613	1	1.24676	0	1.22244	1.53451e-05	0.000327551	yes	UP	no
VEPH1	non local hub	R4	Non-hub kinless nodes	347	135	-0.20422	FIGHT CLUB	0.848641	-1.72109	1	2.40099	0	1.61753	0.000118972	0.000853818	yes	UP	no
VPS13D	non local hub	R4	Non-hub kinless nodes	455	195	-0.127682	FIGHT CLUB	0.816327	-1.2106	1	0.942509	0	0.895588	0.000709447	0.00229904	yes	UP	no
VPS9D1	non local hub	R4	Non-hub kinless nodes	418	151	-0.256873	FIGHT CLUB	0.869503	-1.58496	1	0.697777	0	0.710862	0.0035851	0.00671916	yes	UP	no
WDFY3-AS2	non local hub	R4	Non-hub kinless nodes	479	202	-0.140904	FIGHT CLUB	0.822159	-1.15104	1	0.730311	0	0.709296	0.000107558	0.000799936	yes	UP	no
WDR13	non local hub	R4	Non-hub kinless nodes	201	69	-0.275797	FIGHT CLUB	0.882156	-2.28264	1	0.707081	0	0.721294	0.00417947	0.00752887	yes	UP	no
ZBED3	non local hub	R4	Non-hub kinless nodes	435	169	-0.207943	FIGHT CLUB	0.849063	-1.43181	1	0.706567	0	0.735383	9.28373e-06	0.000266894	yes	UP	no
ZER1	non local hub	R4	Non-hub kinless nodes	433	188	-0.126882	FIGHT CLUB	0.811488	-1.27016	1	0.891184	0	0.932477	0.000649707	0.00219215	yes	UP	no
ZKSCAN1	non local hub	R4	Non-hub kinless nodes	377	149	-0.186752	FIGHT CLUB	0.843797	-1.60198	1	0.68018	0	0.847606	0.000337127	0.00151492	yes	UP	no
ZMAT3	non local hub	R4	Non-hub kinless nodes	368	144	-0.200384	FIGHT CLUB	0.846881	-1.64452	1	0.801514	0	0.840117	3.26548e-07	9.78911e-05	yes	UP	no
ZNF440	non local hub	R4	Non-hub kinless nodes	357	138	-0.211913	FIGHT CLUB	0.850576	-1.69557	1	0.953026	0	0.950647	1.35042e-05	0.000306544	yes	UP	no
ZNF512B	non local hub	R4	Non-hub kinless nodes	59	22	-0.221693	FIGHT CLUB	0.860959	-2.68252	1	0.831582	0	0.73232	0.00641888	0.0102961	yes	UP	no
ZNF536	non local hub	R4	Non-hub kinless nodes	444	192	-0.118747	FIGHT CLUB	0.813002	-1.23613	1	0.950334	0	0.827725	8.8792e-06	0.000258285	yes	UP	yes
ZNF629	non local hub	R4	Non-hub kinless nodes	474	208	-0.107537	FIGHT CLUB	0.807438	-1.09999	1	1.1556	0	1.08182	0.000379228	0.00162494	yes	UP	no
ZNF773	non local hub	R4	Non-hub kinless nodes	320	143	-0.0928481	FIGHT CLUB	0.800303	-1.65303	1	0.897743	0	0.811649	0.0105357	0.0151931	yes	UP	no
ZSWIM8	non local hub	R4	Non-hub kinless nodes	500	214	-0.130118	FIGHT CLUB	0.816816	-1.04894	1	0.752934	0	0.683908	7.04249e-05	0.000656328	yes	UP	yes
ZZEF1	non local hub	R4	Non-hub kinless nodes	428	146	-0.297621	FIGHT CLUB	0.883636	-1.6275	1	0.752182	0	0.738974	0.00175632	0.00409975	yes	UP	no
ZZZ3	non local hub	R4	Non-hub kinless nodes	442	188	-0.135171	FIGHT CLUB	0.819086	-1.27016	1	0.801703	0	0.906822	0.00015222	0.000993779	yes	UP	no
ACACB	non local hub	R3	Non-hub connectors	182	96	0.052661	DATE	0.721773	-2.05291	1	0.706611	0	0.791545	0.00312863	0.00607439	no	UP
ACAD10	non local hub	R3	Non-hub connectors	388	175	-0.0947296	FIGHT CLUB	0.796571	-1.38076	1	0.913246	0	0.942952	0.00262894	0.0053582	no	UP
ACADS	non local hub	R3	Non-hub connectors	344	159	-0.0628077	FIGHT CLUB	0.786363	-1.5169	1	1.4735	0	1.25459	0.00559352	0.00930067	no	UP
ACSF2	non local hub	R3	Non-hub connectors	328	155	-0.041915	FIGHT CLUB	0.776686	-1.55093	1	1.57155	0	1.22034	0.00557722	0.00928781	no	UP
ADHFE1	non local hub	R3	Non-hub connectors	132	67	-0.00959453	FIGHT CLUB	0.742367	-2.29965	1	0.867461	8.33333	0.892388	0.00510821	0.00869691	no	UP
AFF3	non local hub	R3	Non-hub connectors	328	148	-0.0822957	FIGHT CLUB	0.796401	-1.61049	1	1.0241	0	0.870985	0.00674716	0.0106962	no	UP
ALDH6A1	non local hub	R3	Non-hub connectors	431	195	-0.0845393	FIGHT CLUB	0.795301	-1.2106	1	0.904529	0	0.812137	0.000104093	0.000786034	no	UP
ANKRD9	non local hub	R3	Non-hub connectors	316	149	-0.0423027	FIGHT CLUB	0.77767	-1.60198	1	1.03992	0	0.703833	0.0024244	0.00508268	no	UP
ARSA	non local hub	R3	Non-hub connectors	115	61	0.0595787	DATE	0.718639	-2.3507	1	0.947565	0	0.804647	0.00402632	0.00733845	no	UP
ATG2A	non local hub	R3	Non-hub connectors	390	182	-0.0579366	FIGHT CLUB	0.782222	-1.32121	1	1.32939	0	1.23164	0.00566781	0.00938778	no	UP
C11orf71	non local hub	R3	Non-hub connectors	402	186	-0.063524	FIGHT CLUB	0.785921	-1.28717	1	0.73061	0	0.788736	6.63538e-05	0.0006371	no	UP
C16orf89	non local hub	R3	Non-hub connectors	368	167	-0.0850855	FIGHT CLUB	0.794062	-1.44883	1	1.66851	8.33333	1.60884	0.0089584	0.0133453	no	UP
CARD14	non local hub	R3	Non-hub connectors	101	59	0.162032	DATE	0.658759	-2.36772	1	1.60563	0	1.00126	0.0251012	0.0313945	no	UP
CD82	non local hub	R3	Non-hub connectors	159	74	-0.0590137	FIGHT CLUB	0.783395	-2.24009	1	1.83962	8.33333	0.929482	0.000894019	0.00265399	no	UP
CDC42EP4	non local hub	R3	Non-hub connectors	272	125	-0.0736086	FIGHT CLUB	0.788806	-1.80618	1	0.780694	0	0.840836	0.000379461	0.00162494	no	UP
CDH1	non local hub	R3	Non-hub connectors	78	40	0.164944	DATE	0.737015	-2.52937	1	3.68755	0	0.745934	0.034023	0.0412064	no	UP
CDK15	non local hub	R3	Non-hub connectors	307	140	-0.0753682	FIGHT CLUB	0.79204	-1.67855	1	1.62125	8.33333	1.43165	0.0173437	0.0229445	no	UP
CEND1	non local hub	R3	Non-hub connectors	214	96	-0.0875059	FIGHT CLUB	0.79876	-2.05291	1	2.21853	0	1.5716	0.000914638	0.00269243	no	UP
CIART	non local hub	R3	Non-hub connectors	358	173	-0.0282747	FIGHT CLUB	0.766479	-1.39778	1	0.859297	0	0.910073	0.00890733	0.0132934	no	UP
CIB2	non local hub	R3	Non-hub connectors	202	120	0.176657	DATE	0.647093	-1.84872	1	0.626829	0	0.682444	0.031139	0.0380416	no	UP
CITED1	non local hub	R3	Non-hub connectors	170	80	-0.0452233	FIGHT CLUB	0.778547	-2.18905	1	1.44911	0	0.820342	0.00275282	0.00553945	no	UP
CLYBL	non local hub	R3	Non-hub connectors	179	96	0.059999	DATE	0.712369	-2.05291	1	1.01273	0	0.917037	0.00203503	0.00451331	no	UP
CNTNAP1	non local hub	R3	Non-hub connectors	128	65	0.0239437	DATE	0.742126	-2.31667	1	1.80237	0	0.918563	0.0128888	0.0178735	no	UP
COX5B	non local hub	R3	Non-hub connectors	270	130	-0.0242973	FIGHT CLUB	0.768176	-1.76363	1	0.792971	0	0.693642	0.0106819	0.0153725	no	UP
COX8A	non local hub	R3	Non-hub connectors	393	188	-0.0329327	FIGHT CLUB	0.771161	-1.27016	1	0.704314	0	0.681184	0.000306246	0.00144483	no	UP
CPLX1	non local hub	R3	Non-hub connectors	386	174	-0.0864729	FIGHT CLUB	0.7968	-1.38927	1	1.14484	0	1.24019	0.00233894	0.00494548	no	UP
CPM	non local hub	R3	Non-hub connectors	94	52	0.105397	DATE	0.693979	-2.42728	1	3.87683	0	1.408	0.0273931	0.0339034	no	UP
CPPED1	non local hub	R3	Non-hub connectors	332	153	-0.0741613	FIGHT CLUB	0.787623	-1.56795	1	0.837413	0	0.816207	0.0121089	0.0169738	no	UP
CTSF	non local hub	R3	Non-hub connectors	206	96	-0.0589571	FIGHT CLUB	0.782826	-2.05291	1	1.30626	0	1.21894	0.00118797	0.0032018	no	UP
DEXI	non local hub	R3	Non-hub connectors	385	178	-0.0608747	FIGHT CLUB	0.786244	-1.35524	1	1.41446	0	1.183	0.00126075	0.00331082	no	UP
DNAJC4	non local hub	R3	Non-hub connectors	365	179	-0.00930499	FIGHT CLUB	0.759497	-1.34673	1	0.948002	0	0.739812	0.00152079	0.00372136	no	UP
FAHD2CP	non local hub	R3	Non-hub connectors	292	139	-0.036679	FIGHT CLUB	0.773398	-1.68706	1	1.33725	0	1.33358	3.62868e-05	0.000482124	no	UP
FAM167A	non local hub	R3	Non-hub connectors	232	105	-0.0802669	FIGHT CLUB	0.795166	-1.97634	1	1.27506	0	0.683286	0.0374425	0.0449493	no	UP
FAM214A	non local hub	R3	Non-hub connectors	247	138	0.104314	DATE	0.687849	-1.69557	1	0.74427	0	0.709771	0.000138836	0.000949259	no	UP
FGF14	non local hub	R3	Non-hub connectors	107	57	0.0613684	DATE	0.71622	-2.38473	1	1.32636	0	1.03054	0.014086	0.0192352	no	UP
FOSB	non local hub	R4	Non-hub kinless nodes	4	0	0.884571	no hub	1	-2.8697	1	0.755172	0	-0.80872	0.00203481	0.00451331	no	DOWN
FRG2DP	non local hub	R3	Non-hub connectors	86	43	0.188172	DATE	0.75	-2.50385	1	4.88333	16.6667	0.837173	0.00110342	0.00305005	no	UP
FSTL1	non local hub	R3	Non-hub connectors	209	103	-0.00739809	FIGHT CLUB	0.757126	-1.99336	1	0.929161	0	0.991199	0.0014898	0.00368033	no	UP
GAS6	non local hub	R3	Non-hub connectors	109	53	-0.00261587	FIGHT CLUB	0.763572	-2.41877	1	2.46914	0	0.722787	0.00171233	0.00402958	no	UP
GLI4	non local hub	R3	Non-hub connectors	303	142	-0.0530642	FIGHT CLUB	0.78037	-1.66154	1	0.956913	0	0.972999	0.00135302	0.00346611	no	UP
GOT1	non local hub	R3	Non-hub connectors	383	177	-0.0642196	FIGHT CLUB	0.786426	-1.36375	1	1.35468	0	1.20253	0.00292132	0.00576987	no	UP
GSTM4	non local hub	R3	Non-hub connectors	324	147	-0.0860969	FIGHT CLUB	0.794153	-1.61899	1	0.738951	0	0.751608	0.0171128	0.0226696	no	UP
GYS1	non local hub	R3	Non-hub connectors	387	175	-0.0838052	FIGHT CLUB	0.795518	-1.38076	1	0.931837	0	0.868644	0.00327775	0.00628939	no	UP
HMGCL	non local hub	R2	Peripheral nodes	155	95	0.193132	DATE	0.62435	-2.06142	1	0.63631	0	0.721462	0.00125372	0.00330301	no	UP
HSPA12A	non local hub	R3	Non-hub connectors	104	59	0.122557	DATE	0.678162	-2.36772	1	0.597523	0	0.922178	0.000756208	0.00238608	no	UP
IKZF4	non local hub	R3	Non-hub connectors	353	164	-0.0632446	FIGHT CLUB	0.784157	-1.47436	1	0.717396	0	0.750674	0.009671	0.0141454	no	UP
IPO13	non local hub	R3	Non-hub connectors	391	179	-0.0722101	FIGHT CLUB	0.790419	-1.34673	1	0.928291	0	0.918517	0.00313846	0.00608867	no	UP
KIF1A	non local hub	R3	Non-hub connectors	283	134	-0.0453297	FIGHT CLUB	0.775799	-1.7296	1	0.929999	0	0.925017	0.0287353	0.0353954	no	UP
KLC4	non local hub	R3	Non-hub connectors	408	185	-0.0778039	FIGHT CLUB	0.7944	-1.29568	1	1.19456	0	0.99922	0.000479951	0.00183044	no	UP
LGALS1	non local hub	R4	Non-hub kinless nodes	102	43	0.00213912	DATE	0.82228	-2.50385	1	3.04376	0	0.691187	0.00348629	0.00658164	no	UP
LINC00173	non local hub	R3	Non-hub connectors	270	149	0.0979672	DATE	0.69546	-1.60198	1	1.05636	0	0.925777	0.000708226	0.00229679	no	UP
LINC01320	non local hub	R3	Non-hub connectors	212	101	-0.0370094	FIGHT CLUB	0.773029	-2.01037	1	1.00836	0	0.869775	0.000843302	0.00256857	no	UP
LOC171391	non local hub	R3	Non-hub connectors	260	119	-0.0724908	FIGHT CLUB	0.790518	-1.85723	1	0.709643	0	0.716643	0.000592419	0.0020611	no	UP
LONRF2	non local hub	R4	Non-hub kinless nodes	39	16	0.20439	DATE	0.83169	-2.73357	1	0.965604	0	-0.918554	0.0143496	0.0195247	no	DOWN
LPIN3	non local hub	R3	Non-hub connectors	153	86	0.113478	DATE	0.684053	-2.138	1	0.63171	0	0.710064	0.00105037	0.00295232	no	UP
LURAP1	non local hub	R3	Non-hub connectors	348	157	-0.0830005	FIGHT CLUB	0.796464	-1.53391	1	0.846777	0	0.695714	0.000442339	0.00175366	no	UP
MAD2L1BP	non local hub	R3	Non-hub connectors	21	10	0.125743	DATE	0.773243	-2.78462	1	0.768642	0	-0.775323	0.0218633	0.0278415	no	DOWN
MCCC1	non local hub	R3	Non-hub connectors	380	171	-0.0867549	FIGHT CLUB	0.7975	-1.4148	1	0.735188	0	0.696698	0.000557198	0.00198848	no	UP
MDH1	non local hub	R3	Non-hub connectors	357	162	-0.0791929	FIGHT CLUB	0.794082	-1.49137	1	0.779821	0	0.703463	0.00363995	0.00679605	no	UP
MEGF8	non local hub	R3	Non-hub connectors	430	204	-0.0437326	FIGHT CLUB	0.774927	-1.13403	1	0.904562	0	0.879762	0.000675277	0.00223848	no	UP
MET	non local hub	R3	Non-hub connectors	259	117	-0.0916322	FIGHT CLUB	0.795933	-1.87424	1	0.793604	0	0.741722	0.000390547	0.00163425	no	UP
MIB2	non local hub	R3	Non-hub connectors	351	160	-0.0761625	FIGHT CLUB	0.792209	-1.50839	1	0.842979	0	1.0453	0.00174201	0.00407409	no	UP
MIR3189	non local hub	R4	Non-hub kinless nodes	36	4	0.729326	PARTY	0.987654	-2.83567	1	1.48585	16.6667	-1.33065	0.00560732	0.00930815	no	DOWN
MPC2	non local hub	R3	Non-hub connectors	292	138	-0.0484589	FIGHT CLUB	0.776647	-1.69557	1	0.904737	0	0.899705	0.0174574	0.0230701	no	UP
MYH7B	non local hub	R3	Non-hub connectors	308	152	-0.01132	FIGHT CLUB	0.756451	-1.57645	1	1.20459	0	1.18471	0.0193542	0.025091	no	UP
MYL5	non local hub	R3	Non-hub connectors	104	52	-0.000604517	FIGHT CLUB	0.75	-2.42728	1	0.565773	0	0.694598	0.0308047	0.0376613	no	UP
MYLK	non local hub	R3	Non-hub connectors	226	103	-0.0778819	FIGHT CLUB	0.79229	-1.99336	1	2.11745	0	1.93251	0.036016	0.0433533	no	UP
NDUFS7	non local hub	R3	Non-hub connectors	318	165	0.0403835	DATE	0.730776	-1.46585	1	0.986921	0	0.891869	0.00292417	0.00577087	no	UP
NMNAT1	non local hub	R3	Non-hub connectors	277	126	-0.0806166	FIGHT CLUB	0.79309	-1.79767	1	1.17399	0	1.15064	0.0124853	0.0173776	no	UP
NMRK2	non local hub	R3	Non-hub connectors	202	96	-0.0393698	FIGHT CLUB	0.77414	-2.05291	1	1.2733	8.33333	0.770069	0.00404215	0.00734881	no	UP
NQO2	non local hub	R3	Non-hub connectors	284	131	-0.0692089	FIGHT CLUB	0.787232	-1.75513	1	0.698	0	0.755898	0.0180912	0.0237417	no	UP
NRBP2	non local hub	R3	Non-hub connectors	206	102	-0.0207478	FIGHT CLUB	0.754831	-2.00186	1	1.10336	0	1.20018	0.00171908	0.00403212	no	UP
NREP	non local hub	R3	Non-hub connectors	127	67	0.058881	DATE	0.721681	-2.29965	1	2.09516	0	1.04218	0.013171	0.0182083	no	UP
OR2C3	non local hub	R3	Non-hub connectors	93	50	0.0784919	DATE	0.710949	-2.44429	1	1.95649	25	0.74526	0.0314294	0.0383297	no	UP
PAQR8	non local hub	R3	Non-hub connectors	190	89	-0.0540835	FIGHT CLUB	0.780582	-2.11247	1	1.83189	0	1.0315	0.000181585	0.00107551	no	UP
PCBP4	non local hub	R3	Non-hub connectors	325	156	-0.0281923	FIGHT CLUB	0.7696	-1.54242	1	0.937877	0	0.799264	0.0065976	0.0105066	no	UP
PHF7	non local hub	R3	Non-hub connectors	371	183	-0.00946332	FIGHT CLUB	0.756693	-1.3127	1	0.890383	0	0.857268	0.00110363	0.00305005	no	UP
PIK3IP1	non local hub	R3	Non-hub connectors	128	60	-0.0661188	FIGHT CLUB	0.780273	-2.35921	1	0.766205	0	0.734367	0.00351501	0.00661858	no	UP
PODN	non local hub	R3	Non-hub connectors	260	124	-0.0336786	FIGHT CLUB	0.772544	-1.81468	1	0.955417	25	0.764756	0.0312465	0.0381256	no	UP
POPDC3	non local hub	R3	Non-hub connectors	245	111	-0.0851269	FIGHT CLUB	0.794736	-1.92529	1	1.09576	0	1.1008	0.0329869	0.0400503	no	UP
PPP2R5B	non local hub	R3	Non-hub connectors	382	176	-0.0716721	FIGHT CLUB	0.787725	-1.37226	1	1.18804	0	1.22494	0.00716617	0.0111851	no	UP
PVALB	non local hub	R3	Non-hub connectors	326	151	-0.0687478	FIGHT CLUB	0.785455	-1.58496	1	1.24063	50	1.32019	0.0130657	0.0180831	no	UP
RASD2	non local hub	R3	Non-hub connectors	377	172	-0.0758809	FIGHT CLUB	0.791851	-1.40629	1	0.901684	0	0.917664	0.00567731	0.00940035	no	UP
RTN4R	non local hub	R3	Non-hub connectors	358	170	-0.0386403	FIGHT CLUB	0.774508	-1.42331	1	1.17849	0	1.01955	0.00286658	0.00569856	no	UP
SCX	non local hub	R3	Non-hub connectors	79	46	0.10535	DATE	0.660952	-2.47833	1	0.753075	0	0.715944	0.00953168	0.0139499	no	UP
SERINC2	non local hub	R3	Non-hub connectors	193	90	-0.0563579	FIGHT CLUB	0.782544	-2.10396	1	0.748789	0	0.706482	0.00128287	0.00334161	no	UP
SFXN2	non local hub	R4	Non-hub kinless nodes	44	13	0.355756	DATE	0.912707	-2.7591	1	0.903421	0	-0.707873	0.0416003	0.0494575	no	DOWN
SLC5A10	non local hub	R3	Non-hub connectors	279	151	0.0808061	DATE	0.707082	-1.58496	1	1.17624	33.3333	1.02825	0.00401322	0.00732331	no	UP
SLFN5	non local hub	R3	Non-hub connectors	420	194	-0.0689126	FIGHT CLUB	0.786644	-1.21911	1	1.09889	0	1.06727	0.00201612	0.00448616	no	UP
SNAP25	non local hub	R3	Non-hub connectors	248	125	0.0127983	DATE	0.745951	-1.80618	1	1.06869	8.33333	1.03063	0.0376688	0.0451768	no	UP
SNORA6	non local hub	R2	Peripheral nodes	26	18	-0.275815	FIGHT CLUB	0.52071	-2.71656	1	0.961058	0	-0.873907	0.0195504	0.025292	no	DOWN
SNORD102	non local hub	R4	Non-hub kinless nodes	24	9	0.287597	DATE	0.859375	-2.79313	1	0.963563	0	-0.973564	0.0295946	0.0363179	no	DOWN
SOD2	non local hub	R1	Ultra-peripheral nodes	1	1	0.875713	no hub	0	-2.86119	1	0.822497	0	1.16127	0.0201736	0.0259753	no	UP
SOX4	non local hub	R3	Non-hub connectors	90	43	-0.0566151	FIGHT CLUB	0.771728	-2.50385	1	0.771052	0	0.706489	0.00696456	0.0109491	no	UP
ST20	non local hub	R3	Non-hub connectors	326	157	-0.0279225	FIGHT CLUB	0.768066	-1.53391	1	0.801139	0	0.693404	0.000200733	0.00113839	no	UP
ST20-AS1	non local hub	R3	Non-hub connectors	413	189	-0.0714793	FIGHT CLUB	0.790577	-1.26165	1	0.82872	0	0.844308	0.000600389	0.00208037	no	UP
STON1	non local hub	R3	Non-hub connectors	198	109	0.0959844	DATE	0.696944	-1.94231	1	1.06764	0	1.03131	1.25437e-05	0.000300805	no	UP
SULT1C2	non local hub	R3	Non-hub connectors	238	122	0.0250657	DATE	0.737236	-1.8317	1	0.679709	0	0.707757	0.000308911	0.00144971	no	UP
SUOX	non local hub	R2	Peripheral nodes	107	68	0.238563	DATE	0.596122	-2.29114	1	1.38011	0	1.20746	0.0340059	0.0411959	no	UP
TANGO2	non local hub	R3	Non-hub connectors	391	177	-0.0831679	FIGHT CLUB	0.795076	-1.36375	1	1.47789	0	1.42159	0.00641934	0.0102961	no	UP
TGFB2	non local hub	R3	Non-hub connectors	270	135	0.000237312	DATE	0.75	-1.72109	1	2.39828	8.33333	2.46741	0.0302241	0.0370343	no	UP
THBS3	non local hub	R3	Non-hub connectors	241	110	-0.0721859	FIGHT CLUB	0.79167	-1.9338	1	0.690544	0	0.747257	0.000415666	0.00168475	no	UP
TIMP2	non local hub	R3	Non-hub connectors	129	59	-0.0757822	FIGHT CLUB	0.790818	-2.36772	1	2.20568	0	0.73094	3.17744e-05	0.000443758	no	UP
TM7SF2	non local hub	R3	Non-hub connectors	402	185	-0.0667515	FIGHT CLUB	0.788217	-1.29568	1	0.854872	0	0.726864	0.00014662	0.000975353	no	UP
TMEM129	non local hub	R3	Non-hub connectors	312	166	0.0580455	DATE	0.716921	-1.45734	1	0.787705	0	0.872102	0.00175907	0.00410133	no	UP
TMEM132A	non local hub	R3	Non-hub connectors	246	141	0.139936	DATE	0.671475	-1.67004	1	0.755674	0	0.785278	0.00747005	0.0115772	no	UP
TNS1	non local hub	R2	Peripheral nodes	68	43	0.217232	DATE	0.60013	-2.50385	1	1.07312	0	1.05584	0.0258612	0.0322102	no	UP
TNS3	non local hub	R3	Non-hub connectors	156	73	-0.0542301	FIGHT CLUB	0.781024	-2.2486	1	2.06008	0	0.97559	0.000416829	0.00168514	no	UP
TOM1	non local hub	R3	Non-hub connectors	380	175	-0.0710989	FIGHT CLUB	0.787916	-1.38076	1	0.909586	0	0.864358	0.00683324	0.0107979	no	UP
TPPP3	non local hub	R3	Non-hub connectors	124	60	-0.0555646	FIGHT CLUB	0.765869	-2.35921	1	0.905365	0	0.861165	0.00467049	0.00815055	no	UP
TRAPPC6A	non local hub	R2	Peripheral nodes	130	81	0.220123	DATE	0.611775	-2.18054	1	0.705377	0	0.757155	0.0139119	0.0190398	no	UP
TRO	non local hub	R3	Non-hub connectors	173	82	-0.0400642	FIGHT CLUB	0.775335	-2.17203	1	1.18619	0	0.836286	0.00305111	0.00597235	no	UP
TSPYL1	non local hub	R3	Non-hub connectors	330	150	-0.0783973	FIGHT CLUB	0.793388	-1.59347	1	0.800785	0	0.775561	0.00933677	0.0137424	no	UP
UCN2	non local hub	R4	Non-hub kinless nodes	24	1	0.885435	PARTY	0.998264	-2.86119	1	2.58947	8.33333	-2.1128	0.00854152	0.0128765	no	DOWN
USP35	non local hub	R3	Non-hub connectors	388	176	-0.0778282	FIGHT CLUB	0.79424	-1.37226	1	0.956721	0	0.825121	3.01476e-05	0.000434621	no	UP
VAMP2	non local hub	R3	Non-hub connectors	263	127	-0.034168	FIGHT CLUB	0.766818	-1.78916	1	0.671775	0	0.819067	0.00430491	0.00769842	no	UP
PITPNB	non local hub	R4	Non-hub kinless nodes	121	54	-0.102921	FIGHT CLUB	0.800833	-2.97516	2	0.628928	0	-0.714275	0.00719504	0.0112217	yes	DOWN	no
SNORA62	non local hub	R4	Non-hub kinless nodes	63	25	-0.0423216	FIGHT CLUB	0.84253	-3.26189	2	0.913858	0	-0.953488	0.00333768	0.00636022	yes	DOWN	no
ACOT7	non local hub	R3	Non-hub connectors	282	164	0.153692	DATE	0.661788	-1.88759	2	0.931586	0	-0.777223	3.00468e-05	0.000434621	no	DOWN
ACTL6A	non local hub	R2	Peripheral nodes	379	243	0.263195	DATE	0.588913	-1.10652	2	0.698577	0	-0.750138	0.0012647	0.0033141	no	DOWN
ACTN1	non local hub	R3	Non-hub connectors	346	190	0.37654	DATE	0.698453	-1.63053	2	1.03467	0	-1.04827	0.0146458	0.0198507	no	DOWN
ADGRE5	non local hub	R3	Non-hub connectors	129	67	0.131996	DATE	0.730245	-2.84663	2	0.750758	0	-0.733215	0.00270423	0.00547078	no	DOWN
ADGRG6	non local hub	R3	Non-hub connectors	205	113	0.0882935	DATE	0.696157	-2.39183	2	1.1377	0	-0.690549	0.000688492	0.00226396	no	DOWN
AGAP11	non local hub	R2	Peripheral nodes	161	113	0.369498	DATE	0.507388	-2.39183	2	0.943831	0	-0.753233	0.0374724	0.0449606	no	DOWN
AGRN	non local hub	R3	Non-hub connectors	215	129	0.186413	DATE	0.64	-2.23364	2	1.55398	0	-0.890297	0.000875537	0.00262608	no	DOWN
ALG3	non local hub	R2	Peripheral nodes	296	183	0.220688	DATE	0.617775	-1.69974	2	0.647412	0	-0.745665	0.000256074	0.00131862	no	DOWN
ALKBH2	non local hub	R3	Non-hub connectors	194	105	0.0684986	DATE	0.707062	-2.47093	2	1.09665	0	-0.712664	0.00128123	0.00334139	no	DOWN
AMIGO2	non local hub	R3	Non-hub connectors	448	265	0.255187	DATE	0.650107	-0.889002	2	0.900846	0	-1.01034	0.000675934	0.00223915	no	DOWN
ANKRD39	non local hub	R2	Peripheral nodes	229	149	0.280667	DATE	0.576648	-2.0359	2	1.20898	0	-0.808795	0.0110291	0.0157476	no	DOWN
ANP32A	non local hub	R3	Non-hub connectors	197	112	0.125938	DATE	0.676776	-2.40172	2	1.40845	0	-0.732976	0.000111784	0.000821423	no	DOWN
APOLD1	non local hub	R3	Non-hub connectors	270	148	0.0850074	DATE	0.699534	-2.04578	2	2.64711	0	-2.4055	0.000153513	0.000995604	no	DOWN
ARG2	non local hub	R2	Peripheral nodes	321	214	0.312981	DATE	0.555556	-1.39324	2	0.848417	0	-0.868287	0.00208301	0.00457556	no	DOWN
ARHGAP19	non local hub	R2	Peripheral nodes	408	265	0.273302	DATE	0.578137	-0.889002	2	0.749975	0	-0.728309	0.000846267	0.0025724	no	DOWN
ARHGEF2	non local hub	R3	Non-hub connectors	287	150	0.251013	DATE	0.726839	-2.02601	2	0.817957	0	-0.814498	0.000227087	0.00123765	no	DOWN
ARMC9	non local hub	R3	Non-hub connectors	180	97	0.0882346	DATE	0.709599	-2.55002	2	0.749331	0	-0.790136	0.00123247	0.0032704	no	DOWN
ARRB2	non local hub	R3	Non-hub connectors	472	243	0.365077	DATE	0.73495	-1.10652	2	0.930474	0	-0.969018	0.000896855	0.0026608	no	DOWN
ATIC	non local hub	R2	Peripheral nodes	437	283	0.273305	DATE	0.580618	-0.711035	2	0.763175	0	-0.778376	8.68548e-07	0.000102094	no	DOWN
ATP13A3	non local hub	R3	Non-hub connectors	216	123	0.121611	DATE	0.675733	-2.29296	2	0.50926	0	-0.699518	0.000861076	0.00260175	no	DOWN
ATP1B3	non local hub	R2	Peripheral nodes	306	189	0.219769	DATE	0.618512	-1.64042	2	0.871929	0	-0.728284	1.92841e-05	0.000350877	no	DOWN
AUNIP	non local hub	R2	Peripheral nodes	280	173	0.220927	DATE	0.618253	-1.79861	2	1.0576	0	-0.860726	0.0014913	0.00368203	no	DOWN
B3GAT3	non local hub	R3	Non-hub connectors	127	59	0.572848	PARTY	0.784178	-2.92573	2	0.761587	0	-0.736069	0.000586737	0.00205205	no	DOWN
BAG2	non local hub	R3	Non-hub connectors	287	168	0.155341	DATE	0.657347	-1.84804	2	0.856282	0	-0.784774	0.00220195	0.00473004	no	DOWN
BAZ1A	non local hub	R2	Peripheral nodes	369	241	0.282804	DATE	0.573439	-1.12629	2	0.686172	0	-0.752114	0.00546542	0.00912636	no	DOWN
BCHE	non local hub	R2	Peripheral nodes	418	268	0.261	DATE	0.588929	-0.859341	2	1.43165	0	-1.32519	8.58755e-05	0.000719189	no	DOWN
BIN1	non local hub	R3	Non-hub connectors	119	63	0.0695873	DATE	0.719723	-2.88618	2	2.57957	16.6667	-0.707526	0.00607961	0.00989975	no	DOWN
BLM	non local hub	R2	Peripheral nodes	426	288	0.327667	DATE	0.542948	-0.6616	2	1.05173	0	-1.04689	0.00389231	0.00714778	no	DOWN
BRIX1	non local hub	R3	Non-hub connectors	343	206	0.183763	DATE	0.6393	-1.47234	2	0.851636	0	-0.974967	4.69297e-05	0.000546669	no	DOWN
BTBD3	non local hub	R2	Peripheral nodes	344	245	0.384417	DATE	0.492758	-1.08674	2	0.74198	0	-0.702982	0.000596031	0.00207066	no	DOWN
BUB1B	non local hub	R2	Peripheral nodes	372	255	0.349092	DATE	0.530112	-0.987872	2	0.696819	0	-0.709797	0.00805141	0.0122998	no	DOWN
C19orf48	non local hub	R4	Non-hub kinless nodes	328	136	0.378102	DATE	0.828079	-2.16443	2	0.86181	0	-0.754991	0.00132681	0.00342035	no	DOWN
CACHD1	non local hub	R2	Peripheral nodes	298	195	0.289744	DATE	0.57181	-1.58109	2	1.00855	0	-0.856216	0.00740725	0.0114943	no	DOWN
CARHSP1	non local hub	R3	Non-hub connectors	352	206	0.501309	PARTY	0.657509	-1.47234	2	0.661774	0	-0.683572	0.00133868	0.00343946	no	DOWN
CCDC59	non local hub	R3	Non-hub connectors	467	259	0.268223	DATE	0.692415	-0.948324	2	0.67165	0	-0.712028	0.000505488	0.00188114	no	DOWN
CCDC86	non local hub	R3	Non-hub connectors	393	239	0.23418	DATE	0.630163	-1.14606	2	0.695815	0	-0.753362	1.02868e-05	0.000280585	no	DOWN
CCND1	non local hub	R2	Peripheral nodes	340	218	0.264769	DATE	0.588893	-1.35369	2	2.22884	0	-2.00558	0.000807331	0.00248986	no	DOWN
CD22	non local hub	R2	Peripheral nodes	331	238	0.446384	DATE	0.482991	-1.15595	2	0.964813	0	-1.12947	0.00412875	0.00745116	no	DOWN
CD58	non local hub	R3	Non-hub connectors	492	232	0.265878	DATE	0.777646	-1.21527	2	0.940536	0	-0.972938	0.000515304	0.00189762	no	DOWN
CDC25A	non local hub	R2	Peripheral nodes	368	231	0.236092	DATE	0.605971	-1.22516	2	0.844263	0	-0.910464	0.000384616	0.00162857	no	DOWN
CDC45	non local hub	R2	Peripheral nodes	326	231	0.404124	DATE	0.497902	-1.22516	2	1.02407	0	-0.948938	0.0157259	0.021111	no	DOWN
CDC6	non local hub	R2	Peripheral nodes	225	156	0.342995	DATE	0.519289	-1.96669	2	0.750075	0	-0.879111	0.0032519	0.00625268	no	DOWN
CDR2	non local hub	R3	Non-hub connectors	498	297	0.297688	DATE	0.644324	-0.572617	2	0.814651	0	-0.847367	0.000391968	0.0016351	no	DOWN
CEACAM1	non local hub	R3	Non-hub connectors	444	206	0.323919	DATE	0.784737	-1.47234	2	2.06396	0	-2.19707	1.49363e-06	0.000131119	no	DOWN
CHAC2	non local hub	R4	Non-hub kinless nodes	417	160	0.215493	DATE	0.85278	-1.92714	2	0.860788	0	-0.80333	9.81521e-05	0.00077124	no	DOWN
CHAF1A	non local hub	R2	Peripheral nodes	378	255	0.327825	DATE	0.544911	-0.987872	2	0.709545	0	-0.763252	0.00443231	0.00786883	no	DOWN
CHEK2	non local hub	R2	Peripheral nodes	361	246	0.339714	DATE	0.535639	-1.07686	2	0.78145	0	-0.831784	0.00605707	0.00986632	no	DOWN
CHL1	non local hub	R4	Non-hub kinless nodes	500	175	0.255365	DATE	0.8775	-1.77883	2	1.9974	0	-1.9746	1.00533e-05	0.000278513	no	DOWN
CHN1	non local hub	R2	Peripheral nodes	298	209	0.366959	DATE	0.508119	-1.44268	2	0.751869	0	-0.704129	0.00872574	0.013086	no	DOWN
CHRNA5	non local hub	R4	Non-hub kinless nodes	512	164	0.234402	DATE	0.8974	-1.88759	2	1.10535	0	-1.1058	1.65407e-05	0.000332719	no	DOWN
CHSY1	non local hub	R2	Peripheral nodes	412	253	0.207173	DATE	0.622909	-1.00765	2	0.919243	0	-0.931294	5.30728e-07	9.78911e-05	no	DOWN
CMSS1	non local hub	R2	Peripheral nodes	415	263	0.246217	DATE	0.59838	-0.908776	2	0.923906	0	-0.873066	6.72198e-06	0.000234364	no	DOWN
CNN3	non local hub	R2	Peripheral nodes	214	134	0.235186	DATE	0.607913	-2.1842	2	2.22966	0	-1.24548	0.0165536	0.0220355	no	DOWN
COLGALT1	non local hub	R2	Peripheral nodes	401	263	0.290294	DATE	0.569847	-0.908776	2	0.786828	0	-0.862982	1.51199e-05	0.000327019	no	DOWN
COLGALT2	non local hub	R2	Peripheral nodes	282	181	0.258636	DATE	0.588036	-1.71951	2	0.610261	0	-0.682996	1.51599e-05	0.000327019	no	DOWN
COTL1	non local hub	R3	Non-hub connectors	184	97	0.0538723	DATE	0.722088	-2.55002	2	0.721699	0	-0.718734	0.00196542	0.00441996	no	DOWN
CPB2	non local hub	R3	Non-hub connectors	487	271	0.310044	DATE	0.690343	-0.82968	2	1.45496	0	-1.52144	0.000694445	0.00227897	no	DOWN
CPB2-AS1	non local hub	R3	Non-hub connectors	483	236	0.340298	DATE	0.761257	-1.17573	2	1.59429	0	-1.77933	0.000261061	0.00132992	no	DOWN
CPOX	non local hub	R3	Non-hub connectors	515	281	0.312106	DATE	0.702287	-0.730809	2	1.11758	0	-1.1421	0.000219912	0.00121198	no	DOWN
CPXM1	non local hub	R3	Non-hub connectors	130	73	0.130381	DATE	0.684675	-2.78731	2	4.48251	0	-1.44327	0.0383095	0.045878	no	DOWN
CREM	non local hub	R2	Peripheral nodes	456	287	0.274197	DATE	0.603873	-0.671487	2	1.86667	0	-2.01932	5.58476e-07	9.78911e-05	no	DOWN
CSE1L	non local hub	R4	Non-hub kinless nodes	417	180	0.201221	DATE	0.813674	-1.7294	2	0.706801	0	-0.717465	0.00197306	0.00442952	no	DOWN
CTLA4	non local hub	R2	Peripheral nodes	280	202	0.404839	DATE	0.479541	-1.51188	2	1.75822	0	-1.88808	0.0355573	0.0428851	no	DOWN
CTPS1	non local hub	R3	Non-hub connectors	388	235	0.191886	DATE	0.633164	-1.18561	2	0.703168	0	-0.758754	4.89051e-06	0.000216592	no	DOWN
CYP1A1	non local hub	R4	Non-hub kinless nodes	365	120	0.200715	DATE	0.891912	-2.32262	2	1.70354	0	-1.71311	2.48322e-05	0.000409648	no	DOWN
DCTPP1	non local hub	R2	Peripheral nodes	399	255	0.255917	DATE	0.591554	-0.987872	2	0.671845	0	-0.780578	4.17859e-05	0.000522695	no	DOWN
DDAH1	non local hub	R2	Peripheral nodes	435	278	0.254778	DATE	0.591576	-0.76047	2	0.673402	0	-0.685485	5.69636e-05	0.000591452	no	DOWN
DDIAS	non local hub	R2	Peripheral nodes	433	281	0.281488	DATE	0.57885	-0.730809	2	0.949905	0	-0.944185	0.00121613	0.00324567	no	DOWN
DDIT4	non local hub	R3	Non-hub connectors	311	158	0.428896	DATE	0.741897	-1.94691	2	1.58634	0	-1.86617	0.00126849	0.00331874	no	DOWN
DEF6	non local hub	R3	Non-hub connectors	134	77	0.139551	DATE	0.669804	-2.74776	2	3.04963	16.6667	-1.04123	0.0318218	0.0387409	no	DOWN
DGKG	non local hub	R4	Non-hub kinless nodes	439	174	0.229595	DATE	0.842902	-1.78872	2	0.922539	0	-0.949944	4.01785e-07	9.78911e-05	no	DOWN
DHRS13	non local hub	R2	Peripheral nodes	350	248	0.389025	DATE	0.497927	-1.05708	2	0.716535	0	-0.763686	0.00534142	0.00898031	no	DOWN
DHX33	non local hub	R3	Non-hub connectors	404	199	0.188492	DATE	0.757371	-1.54155	2	0.73393	0	-0.796775	1.52336e-05	0.000327023	no	DOWN
DKC1	non local hub	R3	Non-hub connectors	478	239	0.22238	DATE	0.75	-1.14606	2	0.808472	0	-0.888455	9.79969e-05	0.00077124	no	DOWN
DNAAF3	non local hub	R3	Non-hub connectors	267	163	0.329934	DATE	0.627306	-1.89748	2	0.756996	0	-0.776594	0.000482623	0.00183238	no	DOWN
DNAH14	non local hub	R2	Peripheral nodes	419	284	0.338582	DATE	0.540581	-0.701148	2	0.802079	0	-0.857924	0.00239507	0.00502954	no	DOWN
DNAJC9	non local hub	R3	Non-hub connectors	258	141	0.0887438	DATE	0.701325	-2.11499	2	0.693898	0	-0.742734	0.000434543	0.00173253	no	DOWN
DNMT1	non local hub	R3	Non-hub connectors	397	227	0.352022	DATE	0.673058	-1.26471	2	0.757783	0	-0.717207	0.00896875	0.0133458	no	DOWN
DNTTIP2	non local hub	R3	Non-hub connectors	215	119	0.097682	DATE	0.693651	-2.33251	2	1.32823	0	-0.746301	0.00103676	0.00293564	no	DOWN
DUSP1	non local hub	R3	Non-hub connectors	296	164	0.339376	DATE	0.693024	-1.88759	2	0.76813	0	-0.761562	0.000603111	0.00208355	no	DOWN
E2F8	non local hub	R2	Peripheral nodes	385	269	0.372255	DATE	0.511816	-0.849454	2	0.680267	0	-0.702037	0.0090216	0.0133993	no	DOWN
EAF2	non local hub	R2	Peripheral nodes	385	243	0.237079	DATE	0.601626	-1.10652	2	0.631925	0	-0.772411	0.000684779	0.0022578	no	DOWN
EBF3	non local hub	R3	Non-hub connectors	499	254	0.300808	DATE	0.740901	-0.997759	2	1.21657	0	-1.18283	0.000356749	0.00156422	no	DOWN
EBNA1BP2	non local hub	R3	Non-hub connectors	308	184	0.177998	DATE	0.64311	-1.68985	2	0.825944	0	-0.774667	6.21174e-06	0.000228447	no	DOWN
EBPL	non local hub	R4	Non-hub kinless nodes	295	119	0.217409	DATE	0.837277	-2.33251	2	1.03773	0	-0.980652	0.000224606	0.00123095	no	DOWN
ECE1	non local hub	R2	Peripheral nodes	298	189	0.252569	DATE	0.597755	-1.64042	2	1.17605	0	-0.997961	0.00144452	0.00361756	no	DOWN
EEF1E1	non local hub	R3	Non-hub connectors	518	254	0.262849	DATE	0.759559	-0.997759	2	1.23891	0	-1.26814	0.000141293	0.000956746	no	DOWN
EGR2	non local hub	R2	Peripheral nodes	270	200	0.442179	DATE	0.451303	-1.53166	2	1.06844	0	-1.1178	0.0266606	0.0330919	no	DOWN
EIF4E	non local hub	R3	Non-hub connectors	392	237	0.187667	DATE	0.634469	-1.16584	2	0.625477	0	-0.686949	0.000314507	0.00146691	no	DOWN
EIF5B	non local hub	R2	Peripheral nodes	334	235	0.372161	DATE	0.504957	-1.18561	2	0.867703	0	-0.903373	0.0114569	0.0162218	no	DOWN
EME1	non local hub	R2	Peripheral nodes	269	197	0.431591	DATE	0.463675	-1.56132	2	0.710121	0	-0.764247	0.0196325	0.0253782	no	DOWN
EMILIN2	non local hub	R3	Non-hub connectors	200	118	0.166923	DATE	0.6519	-2.34239	2	1.50397	0	-0.772891	0.00131644	0.00340611	no	DOWN
ENTPD1	non local hub	R2	Peripheral nodes	192	121	0.24207	DATE	0.602837	-2.31273	2	1.49695	0	-0.747557	0.0271252	0.0335973	no	DOWN
EOGT	non local hub	R4	Non-hub kinless nodes	283	125	0.395263	DATE	0.804905	-2.27319	2	0.766073	0	-0.716802	0.00407426	0.0073799	no	DOWN
EPHA2	non local hub	R3	Non-hub connectors	466	230	0.334402	DATE	0.756396	-1.23505	2	1.28069	0	-1.3274	0.00190891	0.00434051	no	DOWN
ERO1A	non local hub	R3	Non-hub connectors	476	290	0.259002	DATE	0.628822	-0.641826	2	0.791897	0	-0.783769	4.13446e-06	0.000199265	no	DOWN
ETS2	non local hub	R3	Non-hub connectors	305	174	0.208681	DATE	0.674539	-1.78872	2	0.566632	0	-0.688447	0.0054047	0.00904955	no	DOWN
ETV5	non local hub	R4	Non-hub kinless nodes	485	164	0.271136	DATE	0.885658	-1.88759	2	3.30467	0	-3.31127	0.0016067	0.00386769	no	DOWN
EXOSC2	non local hub	R2	Peripheral nodes	492	307	0.283122	DATE	0.610644	-0.473747	2	0.796186	0	-0.825402	0.000175963	0.00106009	no	DOWN
EXOSC5	non local hub	R2	Peripheral nodes	358	237	0.298662	DATE	0.561741	-1.16584	2	0.837764	0	-0.801318	0.00070197	0.00229295	no	DOWN
EXOSC9	non local hub	R3	Non-hub connectors	460	281	0.297753	DATE	0.626838	-0.730809	2	0.752221	0	-0.809166	0.0016314	0.00390456	no	DOWN
FAM107B	non local hub	R2	Peripheral nodes	473	307	0.368512	DATE	0.578736	-0.473747	2	1.40819	0	-1.51739	0.000459853	0.00178727	no	DOWN
FAM184A	non local hub	R3	Non-hub connectors	367	181	0.361638	DATE	0.756766	-1.71951	2	0.793455	0	-0.823203	0.00891481	0.0132965	no	DOWN
FAM216A	non local hub	R3	Non-hub connectors	404	242	0.227694	DATE	0.641187	-1.1164	2	0.7364	0	-0.739191	2.8352e-05	0.000427541	no	DOWN
FAM222B	non local hub	R3	Non-hub connectors	426	191	0.332092	DATE	0.798976	-1.62064	2	0.990664	0	-0.960129	0.00346132	0.00653953	no	DOWN
FANCA	non local hub	R2	Peripheral nodes	317	197	0.424962	DATE	0.613799	-1.56132	2	0.910632	0	-0.898323	0.0175896	0.0232073	no	DOWN
FANCD2	non local hub	R2	Peripheral nodes	323	237	0.433179	DATE	0.461617	-1.16584	2	0.681733	0	-0.741843	0.0129628	0.0179609	no	DOWN
FANCE	non local hub	R2	Peripheral nodes	308	204	0.303811	DATE	0.561309	-1.49211	2	0.857012	0	-0.777291	0.00253814	0.00523479	no	DOWN
FANCI	non local hub	R3	Non-hub connectors	422	251	0.352724	DATE	0.646229	-1.02742	2	0.722598	0	-0.721018	0.00426946	0.00766569	no	DOWN
FBXO5	non local hub	R2	Peripheral nodes	407	272	0.313546	DATE	0.553369	-0.819793	2	0.668768	0	-0.739298	0.00183784	0.00422585	no	DOWN
FGFRL1	non local hub	R2	Peripheral nodes	339	217	0.260253	DATE	0.590249	-1.36358	2	0.817143	0	-0.853902	3.95569e-05	0.000508465	no	DOWN
FHOD1	non local hub	R2	Peripheral nodes	470	311	0.347892	DATE	0.56215	-0.434199	2	0.946413	0	-1.01116	4.36667e-05	0.000538358	no	DOWN
FIP1L1	non local hub	R3	Non-hub connectors	438	256	0.234625	DATE	0.658389	-0.977985	2	0.813265	0	-0.803294	0.000126031	0.000887859	no	DOWN
FMN2	non local hub	R2	Peripheral nodes	373	247	0.36281	DATE	0.561493	-1.06697	2	2.0254	0	-1.983	0.0114766	0.016245	no	DOWN
FNDC3B	non local hub	R3	Non-hub connectors	392	231	0.204158	DATE	0.652742	-1.22516	2	0.78811	0	-0.839803	8.87829e-05	0.000729861	no	DOWN
FSCN1	non local hub	R3	Non-hub connectors	119	64	0.0828669	DATE	0.710755	-2.87629	2	4.50848	0	-1.23588	0.000688216	0.00226396	no	DOWN
FSD1	non local hub	R2	Peripheral nodes	430	294	0.34332	DATE	0.532526	-0.602278	2	0.911927	0	-0.998584	0.000285344	0.00139856	no	DOWN
GADD45B	non local hub	R2	Peripheral nodes	267	198	0.444565	DATE	0.450069	-1.55143	2	1.18578	0	-1.32984	0.0166522	0.0221609	no	DOWN
GALE	non local hub	R2	Peripheral nodes	395	257	0.275369	DATE	0.576677	-0.968098	2	0.906183	0	-0.953618	1.87868e-05	0.000349833	no	DOWN
GINS2	non local hub	R2	Peripheral nodes	366	225	0.38818	DATE	0.622077	-1.28448	2	0.799958	0	-0.764157	0.00886172	0.0132495	no	DOWN
GINS3	non local hub	R3	Non-hub connectors	283	155	0.187464	DATE	0.700021	-1.97657	2	0.61834	0	-0.679116	0.000191959	0.00111282	no	DOWN
GLCE	non local hub	R2	Peripheral nodes	378	238	0.241279	DATE	0.603567	-1.15595	2	0.914146	0	-0.862046	1.7352e-05	0.000337412	no	DOWN
GLRX3	non local hub	R4	Non-hub kinless nodes	463	150	0.22208	DATE	0.895041	-2.02601	2	0.913098	0	-0.986488	6.434e-05	0.00062509	no	DOWN
GLS	non local hub	R4	Non-hub kinless nodes	401	174	0.266638	DATE	0.811718	-1.78872	2	0.784047	0	-0.752423	0.00374817	0.00694462	no	DOWN
GNG11	non local hub	R2	Peripheral nodes	379	263	0.359348	DATE	0.518459	-0.908776	2	0.958254	0	-1.05979	0.00850133	0.0128277	no	DOWN
GNL2	non local hub	R2	Peripheral nodes	313	195	0.227448	DATE	0.611867	-1.58109	2	0.792963	0	-0.682633	0.00164773	0.00392833	no	DOWN
GNL3	non local hub	R3	Non-hub connectors	480	231	0.222218	DATE	0.768398	-1.22516	2	0.895359	0	-1.02343	0.00010489	0.000786034	no	DOWN
GNPNAT1	non local hub	R3	Non-hub connectors	417	253	0.192356	DATE	0.631897	-1.00765	2	0.683717	0	-0.747644	1.69817e-05	0.000332719	no	DOWN
GPATCH4	non local hub	R3	Non-hub connectors	335	196	0.14995	DATE	0.657688	-1.57121	2	0.643571	0	-0.781538	0.000234222	0.00126116	no	DOWN
GPR3	non local hub	R2	Peripheral nodes	463	303	0.339036	DATE	0.571724	-0.513295	2	1.12061	0	-1.10069	0.000270218	0.00135274	no	DOWN
GTPBP2	non local hub	R3	Non-hub connectors	389	218	0.341748	DATE	0.685939	-1.35369	2	0.968571	0	-1.06994	4.44413e-05	0.000542854	no	DOWN
GTPBP4	non local hub	R3	Non-hub connectors	247	138	0.10223	DATE	0.687849	-2.14465	2	0.895793	0	-0.695362	0.000193366	0.00111705	no	DOWN
HAT1	non local hub	R4	Non-hub kinless nodes	403	124	0.145929	DATE	0.905325	-2.28307	2	0.609156	0	-0.712796	0.00185608	0.00425582	no	DOWN
HAUS6	non local hub	R3	Non-hub connectors	502	307	0.265674	DATE	0.626002	-0.473747	2	0.829428	0	-0.834319	2.24513e-05	0.000384566	no	DOWN
HEY1	non local hub	R3	Non-hub connectors	513	275	0.310355	DATE	0.712637	-0.790131	2	2.43123	0	-2.41493	0.000399215	0.00164885	no	DOWN
HJURP	non local hub	R4	Non-hub kinless nodes	436	144	0.195245	DATE	0.890918	-2.08533	2	0.712941	0	-0.790001	0.00076439	0.00240265	no	DOWN
HK2	non local hub	R3	Non-hub connectors	407	247	0.1988	DATE	0.631697	-1.06697	2	1.57176	0	-1.57445	2.90258e-06	0.000168185	no	DOWN
HMGA1	non local hub	R2	Peripheral nodes	348	228	0.290189	DATE	0.570749	-1.25482	2	1.10411	0	-1.04223	0.000646133	0.00218907	no	DOWN
HMGA2	non local hub	R3	Non-hub connectors	505	298	0.330239	DATE	0.651783	-0.56273	2	3.3287	0	-3.42362	0.000329131	0.00150512	no	DOWN
HMGB1	non local hub	R4	Non-hub kinless nodes	332	134	0.24633	DATE	0.837095	-2.1842	2	0.725021	0	-0.754002	0.0129077	0.0178946	no	DOWN
HMGN5	non local hub	R4	Non-hub kinless nodes	343	127	0.314615	DATE	0.862906	-2.25341	2	0.99922	0	-1.16649	0.00485414	0.00839062	no	DOWN
HMMR	non local hub	R2	Peripheral nodes	453	288	0.314764	DATE	0.595807	-0.6616	2	0.948027	0	-0.992568	0.00262896	0.0053582	no	DOWN
HNRNPA1	non local hub	R2	Peripheral nodes	319	209	0.284253	DATE	0.570749	-1.44268	2	0.759912	0	-0.716124	0.00566429	0.00938513	no	DOWN
HNRNPA2B1	non local hub	R3	Non-hub connectors	504	305	0.313798	DATE	0.633783	-0.493521	2	0.734708	0	-0.722907	0.000190843	0.00110896	no	DOWN
HNRNPF	non local hub	R3	Non-hub connectors	511	263	0.303204	DATE	0.735107	-0.908776	2	0.86021	0	-0.836148	0.000542349	0.00196332	no	DOWN
HPRT1	non local hub	R4	Non-hub kinless nodes	489	170	0.243692	DATE	0.879141	-1.82827	2	1.15745	0	-1.19026	0.00179953	0.00416698	no	DOWN
ICAM1	non local hub	R3	Non-hub connectors	512	254	0.275728	DATE	0.753891	-0.997759	2	1.70682	0	-1.72469	1.19671e-05	0.000296649	no	DOWN
IER3	non local hub	R4	Non-hub kinless nodes	503	212	0.268607	DATE	0.822362	-1.41301	2	3.67876	0	-3.64882	1.3265e-05	0.000306215	no	DOWN
IPO5	non local hub	R3	Non-hub connectors	488	272	0.307195	DATE	0.689331	-0.819793	2	0.714162	0	-0.751362	0.000722994	0.00232912	no	DOWN
IRX3	non local hub	R4	Non-hub kinless nodes	440	170	0.305341	DATE	0.850723	-1.82827	2	0.710205	0	-0.730152	0.00280615	0.00561917	no	DOWN
ISG20	non local hub	R2	Peripheral nodes	455	299	0.294062	DATE	0.568163	-0.552843	2	1.74236	0	-1.88814	3.05698e-05	0.000438138	no	DOWN
ISYNA1	non local hub	R3	Non-hub connectors	177	104	0.165031	DATE	0.654761	-2.48081	2	1.2675	0	-0.700833	0.00248375	0.00516066	no	DOWN
ITGB3BP	non local hub	R2	Peripheral nodes	396	272	0.348386	DATE	0.528211	-0.819793	2	0.682133	0	-0.711679	0.00571093	0.00943061	no	DOWN
JAG1	non local hub	R3	Non-hub connectors	163	89	0.0930635	DATE	0.701871	-2.62912	2	1.95979	0	-0.771611	2.88855e-05	0.000430001	no	DOWN
JUNB	non local hub	R2	Peripheral nodes	230	163	0.37919	DATE	0.49775	-1.89748	2	0.63917	0	-0.724729	0.000331143	0.00150625	no	DOWN
KCNC4	non local hub	R2	Peripheral nodes	303	197	0.277881	DATE	0.577285	-1.56132	2	0.864073	0	-0.725252	0.00773803	0.0118987	no	DOWN
KIF23	non local hub	R2	Peripheral nodes	375	252	0.345163	DATE	0.548416	-1.01753	2	0.880498	0	-0.884704	0.0106213	0.0152987	no	DOWN
KLF16	non local hub	R3	Non-hub connectors	399	236	0.368295	DATE	0.650153	-1.17573	2	1.03951	0	-1.09969	5.56234e-05	0.000583038	no	DOWN
KLF5	non local hub	R2	Peripheral nodes	295	205	0.36194	DATE	0.517093	-1.48222	2	0.955612	0	-0.97478	0.0255205	0.0318343	no	DOWN
KLHL29	non local hub	R3	Non-hub connectors	287	173	0.193982	DATE	0.636647	-1.79861	2	1.28571	0	-0.961862	0.000268843	0.00134908	no	DOWN
LCLAT1	non local hub	R3	Non-hub connectors	393	224	0.18148	DATE	0.675129	-1.29437	2	0.704427	0	-0.695932	4.41376e-05	0.000542452	no	DOWN
LCP1	non local hub	R2	Peripheral nodes	249	183	0.434892	DATE	0.459864	-1.69974	2	0.889758	0	-1.07418	0.0217049	0.0276786	no	DOWN
LIG1	non local hub	R2	Peripheral nodes	223	140	0.497197	DATE	0.605864	-2.12488	2	0.684117	0	-0.86088	0.00778293	0.0119565	no	DOWN
LINC00520	non local hub	R2	Peripheral nodes	216	133	0.21526	DATE	0.620863	-2.19409	2	2.83817	0	-1.5911	0.00420103	0.0075594	no	DOWN
LINC00622	non local hub	R4	Non-hub kinless nodes	425	168	0.276169	DATE	0.843743	-1.84804	2	2.05816	0	-2.12278	8.94043e-05	0.000733742	no	DOWN
LINC01029	non local hub	R2	Peripheral nodes	247	152	0.214881	DATE	0.621302	-2.00624	2	1.08513	0	-0.68413	0.00558579	0.00929694	no	DOWN
LINC01366	non local hub	R2	Peripheral nodes	214	171	0.543904	PARTY	0.361494	-1.81838	2	0.681933	0	-0.769181	0.0220909	0.0280617	no	DOWN
LINCR-0002	non local hub	R3	Non-hub connectors	130	70	0.0848412	DATE	0.710059	-2.81697	2	2.59287	0	-0.864937	0.000324801	0.00149226	no	DOWN
LITAF	non local hub	R2	Peripheral nodes	318	197	0.224429	DATE	0.616224	-1.56132	2	1.02247	0	-0.878112	0.000216551	0.0012029	no	DOWN
LMNB1	non local hub	R2	Peripheral nodes	384	257	0.312731	DATE	0.552077	-0.968098	2	0.633023	0	-0.705441	0.00571738	0.00943492	no	DOWN
LOC100507006	non local hub	R2	Peripheral nodes	62	46	0.484387	DATE	0.449532	-3.05426	2	1.18945	33.3333	-0.841694	0.034611	0.0418259	no	DOWN
LOC285000	non local hub	R2	Peripheral nodes	286	204	0.39651	DATE	0.491222	-1.49211	2	1.00756	8.33333	-1.21167	0.0194994	0.0252393	no	DOWN
LPAR1	non local hub	R3	Non-hub connectors	498	270	0.314085	DATE	0.706053	-0.839567	2	1.23167	0	-1.15963	0.000552796	0.00198361	no	DOWN
LPAR3	non local hub	R3	Non-hub connectors	159	92	0.146791	DATE	0.665203	-2.59946	2	2.60462	0	-0.980915	0.0222639	0.0282596	no	DOWN
LPL	non local hub	R3	Non-hub connectors	469	275	0.336561	DATE	0.656189	-0.790131	2	1.04617	0	-1.05397	0.00201618	0.00448616	no	DOWN
LYAR	non local hub	R3	Non-hub connectors	417	238	0.232811	DATE	0.674252	-1.15595	2	1.15102	0	-1.19728	0.000201959	0.00114152	no	DOWN
MAD2L1	non local hub	R2	Peripheral nodes	400	250	0.284928	DATE	0.609375	-1.03731	2	0.78885	0	-0.772085	0.00488889	0.00844025	no	DOWN
MAML3	non local hub	R2	Peripheral nodes	481	313	0.317892	DATE	0.576554	-0.414425	2	1.01618	0	-1.0302	0.0008684	0.00261424	no	DOWN
MAP2	non local hub	R2	Peripheral nodes	418	288	0.35732	DATE	0.525286	-0.6616	2	1.25372	0	-1.27415	0.00433446	0.00773157	no	DOWN
MAP3K1	non local hub	R4	Non-hub kinless nodes	379	164	0.255789	DATE	0.812755	-1.88759	2	1.19168	0	-1.26788	0.00257398	0.00528194	no	DOWN
MARCKSL1	non local hub	R2	Peripheral nodes	431	290	0.326395	DATE	0.547268	-0.641826	2	1.08755	0	-1.09168	0.00184887	0.00424523	no	DOWN
MCM10	non local hub	R4	Non-hub kinless nodes	467	163	0.255323	DATE	0.878174	-1.89748	2	1.01976	0	-0.945451	0.00204099	0.00451756	no	DOWN
MCMBP	non local hub	R3	Non-hub connectors	459	280	0.294355	DATE	0.627873	-0.740696	2	0.676937	0	-0.705939	0.00109737	0.00304447	no	DOWN
METTL21A	non local hub	R3	Non-hub connectors	296	181	0.20954	DATE	0.626084	-1.71951	2	0.891593	0	-0.742152	0.000422697	0.00170326	no	DOWN
MEX3A	non local hub	R2	Peripheral nodes	406	265	0.283075	DATE	0.57397	-0.889002	2	0.976761	0	-0.958146	7.33191e-05	0.000666241	no	DOWN
MFSD2A	non local hub	R2	Peripheral nodes	264	163	0.22163	DATE	0.618787	-1.89748	2	1.0048	0	-0.732441	0.00114873	0.00313384	no	DOWN
MGAT1	non local hub	R3	Non-hub connectors	119	72	0.194063	DATE	0.633924	-2.7972	2	1.5752	0	-0.75192	0.0177441	0.0233861	no	DOWN
MIDN	non local hub	R2	Peripheral nodes	417	279	0.315441	DATE	0.552352	-0.750583	2	0.769938	0	-0.833832	0.000252109	0.00130873	no	DOWN
MINPP1	non local hub	R3	Non-hub connectors	252	140	0.173183	DATE	0.691358	-2.12488	2	0.92313	0	-0.954926	0.000183624	0.00108367	no	DOWN
MIR17HG	non local hub	R2	Peripheral nodes	272	198	0.431021	DATE	0.470102	-1.55143	2	1.28039	0	-1.20365	0.00921383	0.013594	no	DOWN
MME	non local hub	R3	Non-hub connectors	107	55	0.0436358	DATE	0.735785	-2.96528	2	4.29456	0	-0.941538	0.0405548	0.0483198	no	DOWN
MND1	non local hub	R2	Peripheral nodes	388	264	0.334689	DATE	0.537039	-0.898889	2	1.08666	0	-1.18778	0.00339305	0.00644273	no	DOWN
MNS1	non local hub	R2	Peripheral nodes	264	187	0.396423	DATE	0.498264	-1.66019	2	0.904422	0	-1.0147	0.0287784	0.0354396	no	DOWN
MRTO4	non local hub	R3	Non-hub connectors	397	243	0.208703	DATE	0.625345	-1.10652	2	0.877728	0	-0.932585	1.19904e-05	0.000296649	no	DOWN
MSH6	non local hub	R3	Non-hub connectors	440	268	0.295701	DATE	0.629008	-0.859341	2	0.765439	0	-0.757664	0.00261396	0.00533647	no	DOWN
MTHFD1L	non local hub	R3	Non-hub connectors	230	133	0.142931	DATE	0.665614	-2.19409	2	0.97459	0	-0.7475	0.00110378	0.00305005	no	DOWN
MYBBP1A	non local hub	R4	Non-hub kinless nodes	453	170	0.238589	DATE	0.859168	-1.82827	2	0.774084	0	-0.777352	1.22754e-05	0.000297271	no	DOWN
NAP1L1	non local hub	R2	Peripheral nodes	436	285	0.287374	DATE	0.572716	-0.691261	2	0.727489	0	-0.759907	0.000231347	0.00125253	no	DOWN
NASP	non local hub	R2	Peripheral nodes	347	227	0.289703	DATE	0.57205	-1.26471	2	0.97937	0	-0.974385	0.00279803	0.00560519	no	DOWN
NCL	non local hub	R3	Non-hub connectors	473	259	0.268529	DATE	0.700169	-0.948324	2	0.776694	0	-0.84055	0.000247321	0.00129904	no	DOWN
NDC1	non local hub	R2	Peripheral nodes	337	207	0.211203	DATE	0.622705	-1.46245	2	0.869002	0	-0.827426	0.000315803	0.00146754	no	DOWN
NDUFAF2	non local hub	R3	Non-hub connectors	432	206	0.283573	DATE	0.772612	-1.47234	2	0.652296	0	-0.680085	0.00180083	0.00416803	no	DOWN
NET1	non local hub	R3	Non-hub connectors	240	115	0.253402	DATE	0.770399	-2.37206	2	0.743554	0	-0.860916	0.00694753	0.0109328	no	DOWN
NLE1	non local hub	R2	Peripheral nodes	439	284	0.323836	DATE	0.581488	-0.701148	2	0.673465	0	-0.733009	9.49063e-05	0.000759868	no	DOWN
NOCT	non local hub	R3	Non-hub connectors	345	185	0.253555	DATE	0.712455	-1.67996	2	0.92744	0	-0.997906	1.10634e-05	0.000288015	no	DOWN
NOLC1	non local hub	R3	Non-hub connectors	471	274	0.221461	DATE	0.661577	-0.800019	2	1.08422	0	-1.10196	1.62823e-06	0.000135668	no	DOWN
NOP56	non local hub	R3	Non-hub connectors	276	163	0.167648	DATE	0.651216	-1.89748	2	1.14515	0	-0.854972	2.98308e-05	0.000433871	no	DOWN
NOP58	non local hub	R2	Peripheral nodes	395	244	0.21855	DATE	0.61842	-1.09663	2	0.9489	0	-1.02424	0.000101328	0.000782209	no	DOWN
NPAS1	non local hub	R2	Peripheral nodes	383	271	0.386875	DATE	0.499342	-0.82968	2	1.08947	0	-1.15746	0.00432894	0.00772734	no	DOWN
NPAT	non local hub	R4	Non-hub kinless nodes	454	179	0.218684	DATE	0.844549	-1.73929	2	0.805163	0	-0.776946	0.000348279	0.00154804	no	DOWN
NPM1	non local hub	R2	Peripheral nodes	480	298	0.253988	DATE	0.614566	-0.56273	2	0.586917	0	-0.684505	0.000387658	0.00163425	no	DOWN
NPM3	non local hub	R2	Peripheral nodes	388	255	0.403919	DATE	0.568066	-0.987872	2	0.76295	0	-0.810588	3.5214e-05	0.000475583	no	DOWN
NSRP1	non local hub	R3	Non-hub connectors	310	185	0.349519	DATE	0.643861	-1.67996	2	0.617566	0	-0.69956	0.0182249	0.0238979	no	DOWN
NT5DC2	non local hub	R2	Peripheral nodes	372	254	0.343485	DATE	0.53379	-0.997759	2	0.783647	0	-0.804662	0.00696224	0.0109489	no	DOWN
NTN1	non local hub	R2	Peripheral nodes	375	234	0.357567	DATE	0.610624	-1.1955	2	0.742063	0	-0.837908	6.23524e-05	0.000623276	no	DOWN
NUP107	non local hub	R2	Peripheral nodes	192	124	0.26076	DATE	0.582899	-2.28307	2	0.721859	0	-0.801662	0.0274997	0.0340145	no	DOWN
NUP88	non local hub	R4	Non-hub kinless nodes	425	165	0.187522	DATE	0.849273	-1.8777	2	0.710698	0	-0.807415	0.00153484	0.00374455	no	DOWN
NXT1	non local hub	R2	Peripheral nodes	398	252	0.249124	DATE	0.599101	-1.01753	2	0.752436	0	-0.732704	0.000268938	0.00134908	no	DOWN
ORC1	non local hub	R2	Peripheral nodes	390	258	0.304773	DATE	0.562367	-0.958211	2	0.67227	0	-0.722764	0.00196892	0.00442579	no	DOWN
OVAAL	non local hub	R3	Non-hub connectors	356	182	0.288047	DATE	0.738638	-1.70962	2	1.05516	0	-1.10324	1.22732e-05	0.000297271	no	DOWN
P2RY1	non local hub	R3	Non-hub connectors	443	256	0.263156	DATE	0.666057	-0.977985	2	0.652794	0	-0.679142	4.02724e-06	0.000199101	no	DOWN
P4HA1	non local hub	R3	Non-hub connectors	397	214	0.21762	DATE	0.709433	-1.39324	2	0.782203	0	-0.802253	7.58141e-06	0.000246823	no	DOWN
PA2G4	non local hub	R3	Non-hub connectors	487	226	0.220604	DATE	0.784643	-1.2746	2	0.87378	0	-0.93386	7.45006e-06	0.000246713	no	DOWN
PAICS	non local hub	R2	Peripheral nodes	340	214	0.236869	DATE	0.603841	-1.39324	2	0.984104	0	-0.861841	0.000253186	0.00131155	no	DOWN
PALLD	non local hub	R3	Non-hub connectors	274	165	0.183871	DATE	0.637367	-1.8777	2	0.835156	0	-1.01728	0.000112718	0.000824588	no	DOWN
PCNA	non local hub	R2	Peripheral nodes	429	282	0.295422	DATE	0.567901	-0.720922	2	0.723728	0	-0.802632	0.00165135	0.00393505	no	DOWN
PCSK6	non local hub	R3	Non-hub connectors	176	99	0.11195	DATE	0.683594	-2.53025	2	1.63904	0	-0.862138	1.7502e-05	0.000337412	no	DOWN
PDCD2L	non local hub	R4	Non-hub kinless nodes	287	96	0.248724	DATE	0.888113	-2.55991	2	0.637361	0	-0.708823	0.000244554	0.00128856	no	DOWN
PDE4B	non local hub	R3	Non-hub connectors	166	86	0.0300294	DATE	0.731601	-2.65878	2	1.55269	0	-0.809928	0.000363996	0.00158214	no	DOWN
PDE7B	non local hub	R4	Non-hub kinless nodes	468	185	0.305045	DATE	0.843739	-1.67996	2	0.803518	0	-0.754721	0.000855632	0.00258849	no	DOWN
PDK1	non local hub	R2	Peripheral nodes	227	175	0.490637	DATE	0.405674	-1.77883	2	0.707	0	-0.83792	0.00709837	0.0111106	no	DOWN
PDLIM1	non local hub	R2	Peripheral nodes	411	254	0.384669	DATE	0.61807	-0.997759	2	0.847608	0	-0.765387	0.00174371	0.00407612	no	DOWN
PELI1	non local hub	R2	Peripheral nodes	356	225	0.244791	DATE	0.600548	-1.28448	2	1.10583	0	-1.04767	0.000102421	0.000782961	no	DOWN
PFDN4	non local hub	R2	Peripheral nodes	448	282	0.240679	DATE	0.603775	-0.720922	2	0.738623	0	-0.823411	0.000312377	0.00146044	no	DOWN
PHKA2-AS1	non local hub	R2	Peripheral nodes	214	134	0.235189	DATE	0.607913	-2.1842	2	1.84858	0	-1.00769	0.0141128	0.0192611	no	DOWN
PIH1D1	non local hub	R3	Non-hub connectors	299	183	0.211287	DATE	0.625407	-1.69974	2	0.804731	0	-0.69912	0.00049733	0.00186347	no	DOWN
PIM3	non local hub	R4	Non-hub kinless nodes	390	173	0.311887	DATE	0.803228	-1.79861	2	0.953652	0	-0.955998	2.908e-06	0.000168185	no	DOWN
PINX1	non local hub	R3	Non-hub connectors	443	270	0.330346	DATE	0.628533	-0.839567	2	0.938617	0	-0.884582	0.00390987	0.00717199	no	DOWN
PLEKHO1	non local hub	R2	Peripheral nodes	333	223	0.319612	DATE	0.551543	-1.30426	2	0.917503	0	-0.982206	0.00456271	0.00802801	no	DOWN
PLK3	non local hub	R2	Peripheral nodes	458	297	0.33338	DATE	0.579485	-0.572617	2	0.899473	0	-0.910335	0.00191511	0.00434307	no	DOWN
PLS1	non local hub	R3	Non-hub connectors	337	202	0.183443	DATE	0.640712	-1.51188	2	1.24973	0	-1.25348	2.84483e-06	0.000168185	no	DOWN
PMAIP1	non local hub	R3	Non-hub connectors	348	202	0.1544	DATE	0.663066	-1.51188	2	0.97204	0	-0.901908	6.40656e-05	0.000623656	no	DOWN
PNN	non local hub	R3	Non-hub connectors	346	195	0.323421	DATE	0.682373	-1.58109	2	0.663853	0	-0.764483	0.0132408	0.0182894	no	DOWN
PNP	non local hub	R3	Non-hub connectors	513	264	0.301739	DATE	0.735166	-0.898889	2	1.17341	0	-1.17079	0.000263692	0.00133952	no	DOWN
POLE2	non local hub	R3	Non-hub connectors	444	271	0.333971	DATE	0.62746	-0.82968	2	1.13449	0	-1.09941	0.00242451	0.00508268	no	DOWN
PPARGC1B	non local hub	R4	Non-hub kinless nodes	458	193	0.25215	DATE	0.822424	-1.60087	2	0.932798	0	-0.993426	0.00125698	0.00330798	no	DOWN
PPAT	non local hub	R2	Peripheral nodes	392	246	0.235522	DATE	0.60618	-1.07686	2	0.692208	0	-0.732035	0.000181289	0.00107505	no	DOWN
PPIH	non local hub	R3	Non-hub connectors	272	160	0.160483	DATE	0.653979	-1.92714	2	0.919361	0	-0.73855	0.00120978	0.00323748	no	DOWN
PPM1G	non local hub	R2	Peripheral nodes	497	319	0.296393	DATE	0.588027	-0.355102	2	0.713651	0	-0.744418	7.39343e-05	0.000670592	no	DOWN
PRDX6	non local hub	R2	Peripheral nodes	496	318	0.295045	DATE	0.588954	-0.364989	2	0.814179	0	-0.871029	0.000180951	0.00107434	no	DOWN
PRIM1	non local hub	R2	Peripheral nodes	357	243	0.338134	DATE	0.536685	-1.10652	2	0.91451	0	-0.925739	0.00693375	0.0109158	no	DOWN
PRMT1	non local hub	R3	Non-hub connectors	362	171	0.263845	DATE	0.776861	-1.81838	2	0.709785	0	-0.720072	5.09926e-05	0.000567934	no	DOWN
PRMT3	non local hub	R3	Non-hub connectors	253	131	0.10083	DATE	0.731897	-2.21386	2	0.749086	0	-0.811119	0.00028263	0.00139384	no	DOWN
PRPF38B	non local hub	R2	Peripheral nodes	257	170	0.299148	DATE	0.562446	-1.82827	2	1.01652	0	-0.685133	0.0124593	0.0173611	no	DOWN
PRPS2	non local hub	R4	Non-hub kinless nodes	411	162	0.22666	DATE	0.844637	-1.90737	2	0.827321	0	-0.857951	6.05914e-06	0.000228447	no	DOWN
PRTG	non local hub	R2	Peripheral nodes	342	240	0.376022	DATE	0.507541	-1.13618	2	0.85603	0	-0.810589	0.0128091	0.017783	no	DOWN
PTCRA	non local hub	R4	Non-hub kinless nodes	403	156	0.312484	DATE	0.850156	-1.96669	2	0.729668	25	-0.745333	0.0006105	0.00210169	no	DOWN
PTPN12	non local hub	R4	Non-hub kinless nodes	498	204	0.26865	DATE	0.832196	-1.49211	2	1.04654	0	-1.03946	0.000283556	0.00139393	no	DOWN
PXK	non local hub	R4	Non-hub kinless nodes	304	113	0.298282	DATE	0.861831	-2.39183	2	1.94271	0	-1.92727	0.0206439	0.0265114	no	DOWN
RAB31	non local hub	R3	Non-hub connectors	216	128	0.172783	DATE	0.648834	-2.24352	2	2.01981	0	-1.06202	0.00161202	0.00387138	no	DOWN
RAD54L	non local hub	R2	Peripheral nodes	353	252	0.39634	DATE	0.490374	-1.01753	2	0.916056	0	-0.90786	0.0056939	0.00941756	no	DOWN
RANBP1	non local hub	R2	Peripheral nodes	399	265	0.30468	DATE	0.558891	-0.889002	2	0.948583	0	-0.886294	0.000563404	0.00199834	no	DOWN
RAP1GAP2	non local hub	R2	Peripheral nodes	419	267	0.251138	DATE	0.593936	-0.869228	2	0.825381	0	-0.771342	1.30339e-05	0.000306215	no	DOWN
RBM38	non local hub	R4	Non-hub kinless nodes	365	161	0.1939	DATE	0.805434	-1.91725	2	0.8367	0	-0.812954	0.000143563	0.000960391	no	DOWN
RCAN1	non local hub	R2	Peripheral nodes	341	229	0.322333	DATE	0.549015	-1.24493	2	1.0883	0	-1.19136	0.00457416	0.00804241	no	DOWN
RCC1	non local hub	R3	Non-hub connectors	276	165	0.182504	DATE	0.642604	-1.8777	2	1.17966	0	-0.840493	5.65224e-05	0.000589945	no	DOWN
RFC3	non local hub	R2	Peripheral nodes	470	312	0.305901	DATE	0.55933	-0.424312	2	0.886942	0	-0.831603	0.000362368	0.00157786	no	DOWN
RFC4	non local hub	R3	Non-hub connectors	238	144	0.19654	DATE	0.633924	-2.08533	2	1.42314	0	-0.847138	0.00259965	0.00531387	no	DOWN
RFWD3	non local hub	R2	Peripheral nodes	468	308	0.294291	DATE	0.566879	-0.46386	2	0.62636	0	-0.729761	0.00062004	0.00212373	no	DOWN
RFX3	non local hub	R2	Peripheral nodes	285	211	0.442586	DATE	0.451881	-1.4229	2	0.693533	0	-0.809996	0.0158218	0.0211992	no	DOWN
RHPN1	non local hub	R2	Peripheral nodes	213	169	0.534553	PARTY	0.370473	-1.83816	2	0.499854	0	-0.710357	0.0223646	0.0283587	no	DOWN
RND3	non local hub	R4	Non-hub kinless nodes	428	171	0.196236	DATE	0.840374	-1.81838	2	2.10054	0	-2.13824	1.35616e-05	0.000306544	no	DOWN
RNMT	non local hub	R3	Non-hub connectors	323	166	0.160324	DATE	0.735874	-1.86782	2	0.834476	0	-0.847768	0.000163496	0.00101483	no	DOWN
RPL14	non local hub	R2	Peripheral nodes	469	308	0.295043	DATE	0.568724	-0.46386	2	0.71169	0	-0.722566	0.000158228	0.00100758	no	DOWN
RPL17	non local hub	R2	Peripheral nodes	343	238	0.434669	DATE	0.518534	-1.15595	2	0.787432	0	-0.842654	0.000898953	0.00266262	no	DOWN
RPL21	non local hub	R2	Peripheral nodes	413	277	0.362056	DATE	0.550159	-0.770357	2	0.815756	0	-0.773373	0.00130418	0.00338329	no	DOWN
RPL23A	non local hub	R2	Peripheral nodes	381	270	0.388917	DATE	0.497799	-0.839567	2	0.762905	0	-0.758501	0.00138177	0.00350685	no	DOWN
RPL34	non local hub	R2	Peripheral nodes	390	249	0.255782	DATE	0.592367	-1.04719	2	0.773037	0	-0.722008	0.000200966	0.00113839	no	DOWN
RPS15A	non local hub	R2	Peripheral nodes	260	165	0.252575	DATE	0.597263	-1.8777	2	0.995505	0	-0.68079	0.00218517	0.00471653	no	DOWN
RPS17	non local hub	R3	Non-hub connectors	277	168	0.198821	DATE	0.63216	-1.84804	2	0.981979	0	-0.70183	0.000413519	0.00168211	no	DOWN
RPS27A	non local hub	R4	Non-hub kinless nodes	468	208	0.30444	DATE	0.802469	-1.45256	2	0.774918	0	-0.696692	0.000199623	0.00113457	no	DOWN
RPS29	non local hub	R2	Peripheral nodes	347	249	0.40315	DATE	0.48508	-1.04719	2	0.779158	0	-0.794223	0.00441347	0.0078412	no	DOWN
RPS3A	non local hub	R2	Peripheral nodes	432	284	0.294655	DATE	0.567816	-0.701148	2	0.673205	0	-0.696767	0.000115964	0.000840825	no	DOWN
RPS6KA3	non local hub	R4	Non-hub kinless nodes	420	178	0.336898	DATE	0.820385	-1.74917	2	0.685225	0	-0.749411	0.000232951	0.00125824	no	DOWN
RRP1B	non local hub	R2	Peripheral nodes	361	222	0.21115	DATE	0.621826	-1.31414	2	0.732851	0	-0.764935	5.33938e-06	0.000220575	no	DOWN
RRP7BP	non local hub	R3	Non-hub connectors	455	244	0.37718	DATE	0.712421	-1.09663	2	0.817557	0	-0.809703	0.000904596	0.00267247	no	DOWN
RSL24D1	non local hub	R3	Non-hub connectors	325	197	0.19595	DATE	0.632578	-1.56132	2	0.848033	0	-0.77254	1.54581e-05	0.000327551	no	DOWN
SAPCD2	non local hub	R2	Peripheral nodes	372	255	0.347467	DATE	0.530112	-0.987872	2	0.975872	0	-0.979128	0.00322787	0.00621794	no	DOWN
SDC3	non local hub	R3	Non-hub connectors	487	223	0.314871	DATE	0.790323	-1.30426	2	2.42093	0	-2.41948	0.0012381	0.00327407	no	DOWN
SEMA3F	non local hub	R2	Peripheral nodes	179	132	0.434049	DATE	0.456197	-2.20398	2	0.797214	0	-0.835803	0.0374785	0.0449606	no	DOWN
SEMA4C	non local hub	R2	Peripheral nodes	402	267	0.309707	DATE	0.558866	-0.869228	2	1.54456	0	-1.59331	0.00204052	0.00451756	no	DOWN
SGK1	non local hub	R4	Non-hub kinless nodes	479	195	0.288445	DATE	0.834271	-1.58109	2	1.07135	0	-1.03291	1.78273e-05	0.00034234	no	DOWN
SHISA2	non local hub	R3	Non-hub connectors	515	259	0.301346	DATE	0.747079	-0.948324	2	3.18935	0	-3.1481	0.000160651	0.00101227	no	DOWN
SLBP	non local hub	R2	Peripheral nodes	126	107	0.625712	PARTY	0.278849	-2.45115	2	0.797604	0	-0.770039	0.0289662	0.035644	no	DOWN
SLC1A5	non local hub	R3	Non-hub connectors	484	276	0.342524	DATE	0.674817	-0.780244	2	1.37207	0	-1.3202	0.000912246	0.00268779	no	DOWN
SLC22A23	non local hub	R2	Peripheral nodes	307	212	0.401461	DATE	0.523136	-1.41301	2	1.24604	0	-1.37544	0.01139	0.0161457	no	DOWN
SLC37A2	non local hub	R4	Non-hub kinless nodes	231	95	0.263797	DATE	0.830869	-2.5698	2	1.08938	0	-1.15493	0.000451492	0.00177112	no	DOWN
SLC39A10	non local hub	R2	Peripheral nodes	475	291	0.285269	DATE	0.624683	-0.631939	2	0.972011	0	-0.97897	0.00127786	0.00333436	no	DOWN
SLC43A1	non local hub	R2	Peripheral nodes	244	186	0.487847	DATE	0.418906	-1.67008	2	0.759494	0	-0.750974	0.0226691	0.0286776	no	DOWN
SLC43A3	non local hub	R3	Non-hub connectors	481	224	0.270313	DATE	0.783127	-1.29437	2	1.26125	0	-1.23703	0.00178189	0.00413665	no	DOWN
SLC45A3	non local hub	R4	Non-hub kinless nodes	335	138	0.222197	DATE	0.830305	-2.14465	2	0.748375	0	-0.707539	2.65513e-05	0.000415793	no	DOWN
SLC4A7	non local hub	R3	Non-hub connectors	480	250	0.307662	DATE	0.728733	-1.03731	2	0.847524	0	-0.796477	0.00162042	0.00388396	no	DOWN
SLC6A6	non local hub	R2	Peripheral nodes	333	234	0.36964	DATE	0.506209	-1.1955	2	0.71362	0	-0.753442	0.000247839	0.00130029	no	DOWN
SLC8A1	non local hub	R3	Non-hub connectors	228	109	0.386585	DATE	0.771449	-2.43138	2	0.733546	0	-0.85338	0.0123511	0.0172249	no	DOWN
SLCO5A1	non local hub	R3	Non-hub connectors	199	89	0.0815072	DATE	0.79998	-2.62912	2	0.693182	0	-0.776236	0.000985384	0.00283948	no	DOWN
SMAD7	non local hub	R2	Peripheral nodes	345	219	0.248141	DATE	0.597051	-1.3438	2	0.702329	0	-0.750166	0.000569555	0.00201	no	DOWN
SNAI1	non local hub	R2	Peripheral nodes	407	273	0.34191	DATE	0.550079	-0.809906	2	1.97202	0	-1.89534	0.00587356	0.00963766	no	DOWN
SNHG12	non local hub	R3	Non-hub connectors	386	200	0.344219	DATE	0.731536	-1.53166	2	1.16596	0	-1.18178	0.00927527	0.0136723	no	DOWN
SNHG15	non local hub	R4	Non-hub kinless nodes	416	174	0.26086	DATE	0.825051	-1.78872	2	1.00985	0	-0.972809	1.3325e-06	0.000125973	no	DOWN
SNHG3	non local hub	R2	Peripheral nodes	421	281	0.315116	DATE	0.554499	-0.730809	2	1.03652	0	-1.1229	0.00190295	0.00433297	no	DOWN
SNORA44	non local hub	R2	Peripheral nodes	141	96	0.33417	DATE	0.536442	-2.55991	2	0.666188	0	-0.868949	0.00919817	0.0135831	no	DOWN
SNORA73A	non local hub	R2	Peripheral nodes	432	283	0.292969	DATE	0.570854	-0.711035	2	1.11666	0	-1.14384	0.00286667	0.00569856	no	DOWN
SNORD2	non local hub	R3	Non-hub connectors	206	120	0.143411	DATE	0.660665	-2.32262	2	0.657209	0	-0.777677	0.00562889	0.0093359	no	DOWN
SNORD20	non local hub	R2	Peripheral nodes	368	240	0.323946	DATE	0.574669	-1.13618	2	0.901552	8.33333	-0.88103	0.000889452	0.00264522	no	DOWN
SNORD26	non local hub	R2	Peripheral nodes	338	224	0.296257	DATE	0.5608	-1.29437	2	0.913861	0	-1.01346	0.00710673	0.0111157	no	DOWN
SNORD29	non local hub	R2	Peripheral nodes	240	166	0.450983	DATE	0.521597	-1.86782	2	1.09439	0	-1.0107	0.0185105	0.0242143	no	DOWN
SNORD30	non local hub	R2	Peripheral nodes	337	228	0.325562	DATE	0.542269	-1.25482	2	1.2137	0	-1.30833	0.0090024	0.0133784	no	DOWN
SNORD33	non local hub	R3	Non-hub connectors	326	162	0.300868	DATE	0.753058	-1.90737	2	1.52921	0	-1.42108	0.00898398	0.0133623	no	DOWN
SNORD44	non local hub	R3	Non-hub connectors	224	129	0.148639	DATE	0.668347	-2.23364	2	0.889592	0	-0.928884	0.007644	0.0117873	no	DOWN
SNORD47	non local hub	R3	Non-hub connectors	277	162	0.383228	DATE	0.657965	-1.90737	2	1.00727	0	-1.05923	0.00920146	0.0135839	no	DOWN
SNORD57	non local hub	R2	Peripheral nodes	315	227	0.407157	DATE	0.480685	-1.26471	2	1.54524	0	-1.55089	0.0189067	0.0246409	no	DOWN
SNORD76	non local hub	R2	Peripheral nodes	380	236	0.2203	DATE	0.614294	-1.17573	2	0.642724	0	-0.863385	0.0017534	0.00409488	no	DOWN
SNORD79	non local hub	R3	Non-hub connectors	393	198	0.232318	DATE	0.746169	-1.55143	2	1.23887	0	-1.21024	0.00084575	0.0025724	no	DOWN
SNORD80	non local hub	R4	Non-hub kinless nodes	191	85	0.131189	DATE	0.801952	-2.66867	2	1.10391	0	-1.1747	0.00745298	0.0115571	no	DOWN
SNRPA1	non local hub	R2	Peripheral nodes	437	288	0.299319	DATE	0.565668	-0.6616	2	0.817838	0	-0.913845	0.000345037	0.0015406	no	DOWN
SNRPB	non local hub	R2	Peripheral nodes	432	286	0.303864	DATE	0.561707	-0.681374	2	0.844441	0	-0.863942	7.42901e-05	0.000671343	no	DOWN
SNRPB2	non local hub	R3	Non-hub connectors	276	152	0.0881836	DATE	0.696702	-2.00624	2	0.6863	0	-0.739814	0.000515707	0.00189762	no	DOWN
SNRPD1	non local hub	R2	Peripheral nodes	481	312	0.273824	DATE	0.579255	-0.424312	2	0.796046	0	-0.794608	0.00011046	0.000814252	no	DOWN
SNRPF	non local hub	R3	Non-hub connectors	453	219	0.269924	DATE	0.766282	-1.3438	2	0.674938	0	-0.745053	0.00288685	0.00572305	no	DOWN
SPESP1	non local hub	R2	Peripheral nodes	342	223	0.28314	DATE	0.574835	-1.30426	2	0.618041	0	-0.681838	0.000249111	0.0013028	no	DOWN
SRPK1	non local hub	R2	Peripheral nodes	415	257	0.220413	DATE	0.616496	-0.968098	2	0.773848	0	-0.827849	3.41573e-05	0.000468709	no	DOWN
SRRD	non local hub	R3	Non-hub connectors	160	85	0.295491	DATE	0.717773	-2.66867	2	0.689251	0	-0.776217	0.00140386	0.00354159	no	DOWN
SSB	non local hub	R3	Non-hub connectors	466	266	0.260103	DATE	0.67417	-0.879115	2	0.73792	0	-0.822982	0.00112582	0.00308502	no	DOWN
SYNCRIP	non local hub	R3	Non-hub connectors	144	74	0.023547	DATE	0.735918	-2.77742	2	0.749972	0	-0.744374	0.00291181	0.00576127	no	DOWN
TAF1D	non local hub	R2	Peripheral nodes	399	266	0.312748	DATE	0.555556	-0.879115	2	0.727758	0	-0.792827	0.00183715	0.00422585	no	DOWN
TBC1D4	non local hub	R4	Non-hub kinless nodes	358	159	0.244989	DATE	0.802745	-1.93703	2	1.1911	0	-1.19925	4.08209e-05	0.000517205	no	DOWN
TCERG1	non local hub	R4	Non-hub kinless nodes	316	123	0.283813	DATE	0.848492	-2.29296	2	0.784523	0	-0.82336	0.0028767	0.00570837	no	DOWN
TCOF1	non local hub	R3	Non-hub connectors	482	257	0.328916	DATE	0.715703	-0.968098	2	0.903575	0	-0.912457	0.00194457	0.00438511	no	DOWN
TERT	non local hub	R2	Peripheral nodes	330	222	0.325074	DATE	0.547438	-1.31414	2	1.0505	0	-1.05439	0.00877949	0.0131505	no	DOWN
TEX10	non local hub	R2	Peripheral nodes	434	269	0.217211	DATE	0.615829	-0.849454	2	0.767067	0	-0.772628	2.349e-05	0.000394119	no	DOWN
TEX9	non local hub	R3	Non-hub connectors	368	194	0.234945	DATE	0.722088	-1.59098	2	0.872022	0	-0.810528	4.77807e-05	0.000550336	no	DOWN
TFAP4	non local hub	R2	Peripheral nodes	447	287	0.344958	DATE	0.587761	-0.671487	2	0.847257	0	-0.84532	0.00176145	0.00410394	no	DOWN
THUMPD2	non local hub	R2	Peripheral nodes	327	223	0.348909	DATE	0.534934	-1.30426	2	0.692963	0	-0.689763	0.010333	0.0149359	no	DOWN
TIPIN	non local hub	R2	Peripheral nodes	337	214	0.248083	DATE	0.596756	-1.39324	2	0.765101	0	-0.860702	0.00223034	0.00477429	no	DOWN
TMA16	non local hub	R4	Non-hub kinless nodes	503	187	0.214147	DATE	0.861788	-1.66019	2	0.968573	0	-1.01182	0.000222261	0.00122082	no	DOWN
TMEM123	non local hub	R2	Peripheral nodes	423	278	0.29434	DATE	0.568074	-0.76047	2	0.739555	0	-0.741466	0.00291757	0.00576885	no	DOWN
TNFRSF21	non local hub	R4	Non-hub kinless nodes	434	136	0.220991	DATE	0.901803	-2.16443	2	1.04759	0	-1.02393	5.16792e-06	0.000220575	no	DOWN
TNFSF13B	non local hub	R2	Peripheral nodes	319	230	0.409395	DATE	0.480154	-1.23505	2	0.886636	0	-0.940098	0.0183252	0.0240054	no	DOWN
TNIK	non local hub	R3	Non-hub connectors	241	131	0.0944365	DATE	0.704533	-2.21386	2	1.0464	0	-1.02867	0.000492392	0.00185221	no	DOWN
TOMM6	non local hub	R2	Peripheral nodes	447	292	0.28664	DATE	0.573272	-0.622052	2	0.787867	0	-0.781098	0.000194418	0.00111916	no	DOWN
TPRKB	non local hub	R3	Non-hub connectors	279	170	0.20242	DATE	0.62873	-1.82827	2	1.05021	0	-0.844051	0.00231392	0.00490313	no	DOWN
TRAF4	non local hub	R3	Non-hub connectors	358	214	0.38019	DATE	0.642677	-1.39324	2	0.71841	0	-0.698364	0.0121287	0.016992	no	DOWN
TRIB3	non local hub	R2	Peripheral nodes	366	230	0.23893	DATE	0.605094	-1.23505	2	1.47032	0	-1.43402	5.47731e-05	0.000580072	no	DOWN
TRIM48	non local hub	R2	Peripheral nodes	342	243	0.387479	DATE	0.495152	-1.10652	2	1.34464	25	-1.47949	0.0153006	0.0206076	no	DOWN
TRIP10	non local hub	R2	Peripheral nodes	417	273	0.355366	DATE	0.571399	-0.809906	2	1.0916	0	-1.14989	0.00267192	0.00542326	no	DOWN
TRIP13	non local hub	R2	Peripheral nodes	285	177	0.228148	DATE	0.614294	-1.75906	2	0.863877	0	-0.693528	0.00150856	0.00370572	no	DOWN
TRMT11	non local hub	R2	Peripheral nodes	277	179	0.265024	DATE	0.582413	-1.73929	2	0.94546	0	-0.777857	0.0035	0.00659992	no	DOWN
TSPAN14	non local hub	R3	Non-hub connectors	338	195	0.391814	DATE	0.66716	-1.58109	2	0.83684	0	-1.04364	8.04243e-05	0.000695306	no	DOWN
TTK	non local hub	R2	Peripheral nodes	399	261	0.281405	DATE	0.572107	-0.92855	2	0.734384	0	-0.730315	0.0023488	0.00495568	no	DOWN
TUBB6	non local hub	R3	Non-hub connectors	293	178	0.201103	DATE	0.630933	-1.74917	2	0.886363	0	-0.686079	0.000635378	0.00216161	no	DOWN
TXLNG	non local hub	R4	Non-hub kinless nodes	486	186	0.214453	DATE	0.853528	-1.67008	2	0.87106	0	-0.896899	3.15344e-05	0.000443444	no	DOWN
U2SURP	non local hub	R3	Non-hub connectors	456	276	0.303859	DATE	0.633657	-0.780244	2	0.898483	0	-0.913565	0.00273614	0.00551264	no	DOWN
UBE2T	non local hub	R4	Non-hub kinless nodes	399	161	0.333314	DATE	0.837181	-1.91725	2	0.799615	0	-0.782927	0.00729631	0.0113544	no	DOWN
UCK2	non local hub	R2	Peripheral nodes	474	296	0.280787	DATE	0.610034	-0.582504	2	0.979735	0	-1.01802	1.09022e-05	0.000288015	no	DOWN
UHRF1	non local hub	R2	Peripheral nodes	299	202	0.325283	DATE	0.543585	-1.51188	2	0.776951	0	-0.776617	0.0136808	0.0188178	no	DOWN
USP53	non local hub	R3	Non-hub connectors	134	69	0.0332336	DATE	0.734852	-2.82686	2	2.25916	0	-0.864173	0.000882418	0.00263867	no	DOWN
VPS9D1-AS1	non local hub	R3	Non-hub connectors	176	99	0.118746	DATE	0.683594	-2.53025	2	1.56567	0	-0.726888	0.00493384	0.00848662	no	DOWN
VRK1	non local hub	R2	Peripheral nodes	325	232	0.394601	DATE	0.490424	-1.21527	2	0.666662	0	-0.714544	0.0195993	0.025342	no	DOWN
WDR34	non local hub	R2	Peripheral nodes	248	184	0.471225	DATE	0.449532	-1.68985	2	0.800152	0	-0.79229	0.0124998	0.017383	no	DOWN
WDR54	non local hub	R2	Peripheral nodes	305	206	0.323497	DATE	0.543822	-1.47234	2	0.723539	0	-0.834179	0.00212986	0.00462882	no	DOWN
WDR74	non local hub	R2	Peripheral nodes	315	197	0.236176	DATE	0.608879	-1.56132	2	0.745376	0	-0.698265	0.00138589	0.0035137	no	DOWN
WDR75	non local hub	R3	Non-hub connectors	237	128	0.067905	DATE	0.708309	-2.24352	2	0.632497	0	-0.720729	0.00354562	0.0066604	no	DOWN
YEATS2	non local hub	R2	Peripheral nodes	278	177	0.256385	DATE	0.594625	-1.75906	2	0.927294	0	-0.75124	0.00248053	0.00515615	no	DOWN
ZC3H13	non local hub	R4	Non-hub kinless nodes	503	199	0.272443	DATE	0.84348	-1.54155	2	2.53461	0	-2.65484	0.000574788	0.00202556	no	DOWN
ZC3H7A	non local hub	R3	Non-hub connectors	480	244	0.253655	DATE	0.741597	-1.09663	2	0.733857	0	-0.77286	5.30614e-06	0.000220575	no	DOWN
ZFP36L1	non local hub	R2	Peripheral nodes	396	269	0.334992	DATE	0.538561	-0.849454	2	0.801854	0	-0.785458	0.00308023	0.00601064	no	DOWN
ZNF121	non local hub	R4	Non-hub kinless nodes	441	167	0.201599	DATE	0.856598	-1.85793	2	1.52194	0	-1.4176	0.00122009	0.00325092	no	DOWN
ZNF267	non local hub	R2	Peripheral nodes	380	241	0.243292	DATE	0.597777	-1.12629	2	0.645677	0	-0.746261	0.00132413	0.00341837	no	DOWN
ZNF697	non local hub	R3	Non-hub connectors	470	277	0.320668	DATE	0.652653	-0.770357	2	1.40713	0	-1.43196	1.09772e-05	0.000288015	no	DOWN
AADAT	non local hub	R3	Non-hub connectors	268	161	0.189741	DATE	0.639104	-1.60485	3	1.49714	0	-0.744181	0.000365203	0.00158459	no	DOWN
ABHD17C	non local hub	R4	Non-hub kinless nodes	398	162	0.222271	DATE	0.834322	-1.59591	3	0.818955	0	-0.854786	5.56133e-06	0.000224094	no	DOWN
ACSL1	non local hub	R4	Non-hub kinless nodes	484	193	0.258946	DATE	0.84099	-1.31858	3	1.12055	0	-1.13344	0.000101356	0.000782209	no	DOWN
ACSL3	non local hub	R3	Non-hub connectors	442	254	0.135401	DATE	0.669765	-0.772865	3	0.95396	0	-0.961591	0.000318707	0.00147148	no	DOWN
ACTN4	non local hub	R2	Peripheral nodes	277	176	0.248468	DATE	0.596293	-1.47066	3	0.880703	0	-0.855298	0.00171946	0.00403212	no	DOWN
ADA	non local hub	R3	Non-hub connectors	309	177	0.359595	DATE	0.671882	-1.46171	3	0.895147	0	-0.862845	4.15977e-05	0.000522695	no	DOWN
ADAMTS1	non local hub	R3	Non-hub connectors	425	256	0.187445	DATE	0.637171	-0.754973	3	1.00443	0	-0.979424	8.13855e-06	0.000248775	no	DOWN
ADCY3	non local hub	R4	Non-hub kinless nodes	507	168	0.250531	DATE	0.8902	-1.54223	3	1.25824	0	-1.22346	7.53055e-05	0.000675551	no	DOWN
ADGRL2	non local hub	R2	Peripheral nodes	319	206	0.267035	DATE	0.582984	-1.20228	3	1.07348	0	-0.996848	0.000912516	0.00268779	no	DOWN
AEN	non local hub	R3	Non-hub connectors	461	211	0.196178	DATE	0.79051	-1.15755	3	1.44744	0	-1.40213	0.00159345	0.00385122	no	DOWN
AGAP3	non local hub	R3	Non-hub connectors	457	233	0.255262	DATE	0.740056	-0.960733	3	0.829211	0	-0.814758	0.000732757	0.00234216	no	DOWN
AHR	non local hub	R3	Non-hub connectors	469	257	0.207054	DATE	0.699724	-0.746027	3	1.46571	0	-1.46518	1.04381e-06	0.000114031	no	DOWN
ALDH1A1	non local hub	R2	Peripheral nodes	246	154	0.237163	DATE	0.608104	-1.66748	3	1.58628	25	-0.729895	4.67131e-05	0.000546669	no	DOWN
ALYREF	non local hub	R3	Non-hub connectors	375	219	0.15228	DATE	0.658944	-1.08598	3	0.935881	0	-0.741408	0.000647821	0.00218907	no	DOWN
ANXA1	non local hub	R2	Peripheral nodes	176	116	0.293827	DATE	0.565599	-2.00743	3	1.02665	33.3333	-0.751008	0.0132613	0.0183125	no	DOWN
AP1S3	non local hub	R2	Peripheral nodes	348	220	0.24919	DATE	0.600344	-1.07703	3	1.06557	0	-0.824098	1.86288e-05	0.000349833	no	DOWN
APOD	non local hub	R2	Peripheral nodes	175	112	0.284048	DATE	0.5904	-2.04321	3	2.81761	0	-0.945669	0.00682635	0.0107905	no	DOWN
APRT	non local hub	R3	Non-hub connectors	344	198	0.309478	DATE	0.668706	-1.27385	3	0.946871	0	-0.860631	5.20861e-05	0.000570279	no	DOWN
ARHGAP12	non local hub	R3	Non-hub connectors	293	179	0.207258	DATE	0.626775	-1.44382	3	1.12173	0	-0.686864	0.000253044	0.00131155	no	DOWN
ARHGEF39	non local hub	R3	Non-hub connectors	246	117	0.411711	DATE	0.773795	-1.99848	3	0.852813	0	-0.777722	0.00805033	0.0122998	no	DOWN
ASB4	non local hub	R3	Non-hub connectors	333	154	0.159348	DATE	0.786128	-1.66748	3	0.743496	0	-0.758046	0.0109884	0.0157032	no	DOWN
ASB9	non local hub	R2	Peripheral nodes	163	106	0.321122	DATE	0.577101	-2.09689	3	2.35931	0	-0.703357	4.52759e-05	0.000542975	no	DOWN
ASIC1	non local hub	R3	Non-hub connectors	423	256	0.195512	DATE	0.633732	-0.754973	3	0.771225	0	-0.716918	0.000441282	0.00175281	no	DOWN
ATF3	non local hub	R2	Peripheral nodes	124	81	0.429337	DATE	0.573296	-2.32054	3	0.770657	0	-0.773373	0.0051939	0.00880455	no	DOWN
ATOX1	non local hub	R3	Non-hub connectors	473	287	0.197955	DATE	0.631836	-0.477644	3	1.66846	0	-1.54826	9.57853e-05	0.000761943	no	DOWN
B3GAT1	non local hub	R3	Non-hub connectors	374	209	0.107332	DATE	0.687716	-1.17544	3	1.23048	0	-1.00628	0.00227268	0.00484496	no	DOWN
B4GALNT1	non local hub	R2	Peripheral nodes	161	108	0.359271	DATE	0.550017	-2.079	3	2.44059	0	-0.732033	6.23888e-07	9.78911e-05	no	DOWN
B4GALT1	non local hub	R2	Peripheral nodes	360	228	0.253711	DATE	0.598889	-1.00546	3	1.06769	0	-0.778603	3.99051e-07	9.78911e-05	no	DOWN
B4GALT6	non local hub	R2	Peripheral nodes	357	228	0.260186	DATE	0.592119	-1.00546	3	1.35579	0	-1.39506	0.000507635	0.00188319	no	DOWN
BAIAP2L1	non local hub	R2	Peripheral nodes	271	172	0.251227	DATE	0.597173	-1.50645	3	1.75449	0	-0.928429	0.00187058	0.00427874	no	DOWN
BATF3	non local hub	R2	Peripheral nodes	309	217	0.375683	DATE	0.506823	-1.10387	3	1.28724	8.33333	-1.04068	0.0017116	0.00402958	no	DOWN
BCL9	non local hub	R2	Peripheral nodes	237	154	0.285888	DATE	0.577774	-1.66748	3	1.79557	0	-0.780879	1.87435e-06	0.000142037	no	DOWN
BHLHE40	non local hub	R2	Peripheral nodes	260	161	0.219473	DATE	0.616553	-1.60485	3	1.36997	0	-0.731681	0.00798197	0.0122127	no	DOWN
BOP1	non local hub	R2	Peripheral nodes	373	248	0.300265	DATE	0.557935	-0.826542	3	0.788073	0	-0.778482	5.6772e-05	0.000591295	no	DOWN
C1orf21	non local hub	R4	Non-hub kinless nodes	405	144	0.298289	DATE	0.87358	-1.75694	3	0.945433	0	-0.974588	0.00544452	0.00909455	no	DOWN
CBX5	non local hub	R3	Non-hub connectors	405	239	0.164482	DATE	0.651754	-0.907057	3	0.81182	0	-0.727999	0.000215399	0.00119785	no	DOWN
CCDC112	non local hub	R4	Non-hub kinless nodes	472	169	0.213221	DATE	0.8718	-1.53328	3	0.817186	0	-0.781845	0.0012672	0.0033187	no	DOWN
CD109	non local hub	R2	Peripheral nodes	144	105	0.435362	DATE	0.468316	-2.10583	3	2.78911	0	-0.867395	0.0158179	0.0211992	no	DOWN
CD320	non local hub	R2	Peripheral nodes	247	158	0.254515	DATE	0.590814	-1.63169	3	1.06065	0	-0.740437	0.000724446	0.00233227	no	DOWN
CD3EAP	non local hub	R3	Non-hub connectors	354	216	0.229136	DATE	0.627693	-1.11282	3	1.1469	0	-1.12994	0.00016994	0.00103709	no	DOWN
CD81	non local hub	R3	Non-hub connectors	271	126	0.354564	DATE	0.783826	-1.91797	3	0.677266	0	-0.735328	0.0139365	0.0190682	no	DOWN
CD96	non local hub	R2	Peripheral nodes	173	132	0.48796	DATE	0.417822	-1.86429	3	1.59528	16.6667	-1.07054	0.0311112	0.0380171	no	DOWN
CDCA7	non local hub	R3	Non-hub connectors	367	198	0.18084	DATE	0.708929	-1.27385	3	0.945197	0	-0.868838	0.00716699	0.0111851	no	DOWN
CDCA7L	non local hub	R3	Non-hub connectors	407	210	0.107518	DATE	0.733774	-1.16649	3	0.698687	0	-0.678873	0.0038139	0.00703796	no	DOWN
CDK2AP1	non local hub	R3	Non-hub connectors	452	220	0.148506	DATE	0.763098	-1.07703	3	1.18703	0	-1.17204	0.000758212	0.00239087	no	DOWN
CDK5R1	non local hub	R4	Non-hub kinless nodes	406	147	0.326833	DATE	0.868906	-1.7301	3	0.755287	0	-0.748328	6.68479e-05	0.000640217	no	DOWN
CDK5RAP2	non local hub	R2	Peripheral nodes	269	171	0.24978	DATE	0.595901	-1.51539	3	1.21264	0	-0.693803	0.00464541	0.0081241	no	DOWN
CDK6	non local hub	R2	Peripheral nodes	182	125	0.389292	DATE	0.528288	-1.92691	3	0.651225	0	-0.69054	0.00103727	0.00293564	no	DOWN
CEBPB	non local hub	R3	Non-hub connectors	225	132	0.38462	DATE	0.655822	-1.86429	3	1.29719	0	-1.23738	0.000383418	0.0016264	no	DOWN
CENPJ	non local hub	R3	Non-hub connectors	325	166	0.0312284	DATE	0.739115	-1.56012	3	0.828749	0	-0.854674	0.0137414	0.0188695	no	DOWN
CENPU	non local hub	R4	Non-hub kinless nodes	325	136	0.168157	DATE	0.82489	-1.8285	3	0.978163	0	-0.908546	0.0150557	0.0203224	no	DOWN
CEP170B	non local hub	R2	Peripheral nodes	182	140	0.499435	DATE	0.408284	-1.79272	3	1.03842	0	-0.908745	0.0158828	0.0212751	no	DOWN
CEP85L	non local hub	R2	Peripheral nodes	351	221	0.244287	DATE	0.603567	-1.06809	3	0.953023	0	-0.774946	0.000158857	0.00100912	no	DOWN
CIT	non local hub	R3	Non-hub connectors	338	203	0.186487	DATE	0.63929	-1.22912	3	1.16813	0	-0.894063	0.00376287	0.0069647	no	DOWN
CKS2	non local hub	R3	Non-hub connectors	419	239	0.128038	DATE	0.674637	-0.907057	3	1.09537	0	-1.12964	0.00256229	0.00526379	no	DOWN
CMTM7	non local hub	R3	Non-hub connectors	440	244	0.260655	DATE	0.692479	-0.862326	3	1.48496	0	-1.49529	6.92254e-06	0.000239656	no	DOWN
CMTM8	non local hub	R2	Peripheral nodes	395	245	0.221088	DATE	0.615286	-0.85338	3	1.01955	0	-0.914826	0.000291456	0.00140609	no	DOWN
CNRIP1	non local hub	R2	Peripheral nodes	183	119	0.303507	DATE	0.577145	-1.98059	3	2.68057	0	-0.871954	7.9464e-05	0.000692633	no	DOWN
COL19A1	non local hub	R3	Non-hub connectors	404	242	0.182674	DATE	0.641187	-0.880218	3	2.09317	0	-1.95346	3.55533e-05	0.000477541	no	DOWN
COL9A3	non local hub	R3	Non-hub connectors	301	168	0.105734	DATE	0.68848	-1.54223	3	1.27877	0	-1.09776	0.0122235	0.0170955	no	DOWN
CPN1	non local hub	R2	Peripheral nodes	222	162	0.429061	DATE	0.467495	-1.59591	3	2.1657	16.6667	-1.90318	0.00761323	0.0117472	no	DOWN
CREB5	non local hub	R2	Peripheral nodes	285	196	0.344129	DATE	0.527042	-1.29174	3	0.752408	0	-0.851103	0.00142633	0.00358063	no	DOWN
CSGALNACT1	non local hub	R2	Peripheral nodes	172	132	0.496336	DATE	0.411033	-1.86429	3	1.54675	0	-0.947308	0.0293919	0.0361046	no	DOWN
CSPG5	non local hub	R2	Peripheral nodes	210	147	0.376593	DATE	0.51	-1.7301	3	1.05005	0	-1.03751	0.00255358	0.00525301	no	DOWN
CTNNB1	non local hub	R3	Non-hub connectors	441	227	0.223424	DATE	0.735044	-1.01441	3	0.746155	0	-0.703444	0.000817649	0.0025138	no	DOWN
CXCL8	non local hub	R2	Peripheral nodes	98	64	0.275821	DATE	0.573511	-2.47262	3	0.865327	8.33333	-0.970773	0.010735	0.0154217	no	DOWN
CYB5R2	non local hub	R3	Non-hub connectors	341	194	0.124656	DATE	0.676336	-1.30963	3	1.78331	0	-1.59192	0.00651259	0.0104083	no	DOWN
DAAM2	non local hub	R3	Non-hub connectors	183	95	0.258789	DATE	0.730509	-2.19529	3	0.593664	0	-0.709072	0.000800943	0.00247171	no	DOWN
DAB2IP	non local hub	R2	Peripheral nodes	286	183	0.264126	DATE	0.590579	-1.40804	3	1.16773	0	-0.713899	0.000908839	0.00268178	no	DOWN
DACT1	non local hub	R3	Non-hub connectors	252	149	0.169767	DATE	0.6504	-1.71221	3	1.67465	0	-0.804816	0.00166458	0.00394937	no	DOWN
DBF4	non local hub	R3	Non-hub connectors	394	188	0.0652582	DATE	0.772321	-1.36331	3	0.673295	0	-0.699249	0.00505945	0.0086392	no	DOWN
DBNDD1	non local hub	R3	Non-hub connectors	461	282	0.207713	DATE	0.625806	-0.522374	3	1.21119	0	-1.1936	9.52275e-05	0.000760345	no	DOWN
DCBLD2	non local hub	R2	Peripheral nodes	383	242	0.2567	DATE	0.600761	-0.880218	3	1.00093	0	-1.0566	0.00010989	0.000813584	no	DOWN
DLEU1	non local hub	R4	Non-hub kinless nodes	414	150	0.203061	DATE	0.868725	-1.70326	3	0.669663	0	-0.712843	0.00327537	0.00628728	no	DOWN
DLGAP1-AS1	non local hub	R3	Non-hub connectors	430	229	0.118096	DATE	0.716382	-0.996518	3	1.59113	0	-1.50788	0.00199747	0.00445938	no	DOWN
DLX1	non local hub	R2	Peripheral nodes	362	226	0.257316	DATE	0.610238	-1.02336	3	1.44879	0	-1.40628	0.000173868	0.00105263	no	DOWN
DLX2	non local hub	R2	Peripheral nodes	233	150	0.272268	DATE	0.585551	-1.70326	3	1.35905	0	-1.33235	0.00462949	0.00810491	no	DOWN
DNAJC2	non local hub	R3	Non-hub connectors	338	184	0.0739243	DATE	0.703652	-1.39909	3	1.04906	0	-0.871166	0.00709923	0.0111106	no	DOWN
DOCK10	non local hub	R2	Peripheral nodes	439	277	0.242048	DATE	0.601865	-0.567105	3	0.898182	0	-0.825397	6.07909e-05	0.000614913	no	DOWN
DOCK4	non local hub	R2	Peripheral nodes	268	186	0.367048	DATE	0.518323	-1.3812	3	1.21112	0	-0.929017	0.0027066	0.00547107	no	DOWN
DUSP10	non local hub	R2	Peripheral nodes	385	237	0.215917	DATE	0.621056	-0.924949	3	0.89027	0	-0.773252	1.24001e-06	0.00011956	no	DOWN
DUSP4	non local hub	R4	Non-hub kinless nodes	456	161	0.231041	DATE	0.875341	-1.60485	3	3.57734	0	-3.48621	8.72248e-07	0.000102094	no	DOWN
DUSP6	non local hub	R3	Non-hub connectors	472	251	0.136134	DATE	0.71721	-0.799703	3	3.73613	0	-3.58331	0.000864157	0.00260946	no	DOWN
DYRK2	non local hub	R3	Non-hub connectors	313	186	0.266306	DATE	0.646868	-1.3812	3	1.22321	0	-1.23694	0.000316137	0.00146754	no	DOWN
DYRK3	non local hub	R2	Peripheral nodes	368	237	0.270973	DATE	0.585236	-0.924949	3	1.12601	0	-1.0849	0.000332235	0.00150625	no	DOWN
E2F5	non local hub	R3	Non-hub connectors	496	288	0.164396	DATE	0.662851	-0.468698	3	1.25699	0	-1.15373	2.59885e-05	0.000414187	no	DOWN
EEA1	non local hub	R2	Peripheral nodes	107	68	0.254288	DATE	0.596122	-2.43684	3	0.561759	0	-0.682212	0.0141445	0.0192883	no	DOWN
EEPD1	non local hub	R2	Peripheral nodes	278	182	0.298065	DATE	0.571399	-1.41698	3	1.17652	0	-0.685528	0.000124279	0.000880338	no	DOWN
EGR1	non local hub	R3	Non-hub connectors	295	152	0.0253614	DATE	0.734513	-1.68537	3	2.85076	0	-2.98355	0.0218665	0.0278415	no	DOWN
EHBP1	non local hub	R3	Non-hub connectors	175	92	0.339244	DATE	0.723624	-2.22213	3	0.975	0	-0.938609	0.00234851	0.00495568	no	DOWN
ELK3	non local hub	R3	Non-hub connectors	492	287	0.159514	DATE	0.659722	-0.477644	3	0.960945	0	-1.0103	0.00014017	0.000954399	no	DOWN
ELOVL2	non local hub	R2	Peripheral nodes	160	117	0.437843	DATE	0.465273	-1.99848	3	3.81408	0	-1.28717	0.0193103	0.0250738	no	DOWN
ESCO2	non local hub	R2	Peripheral nodes	269	169	0.242387	DATE	0.605298	-1.53328	3	1.39471	0	-0.736242	2.37217e-05	0.000395833	no	DOWN
ETV1	non local hub	R4	Non-hub kinless nodes	495	202	0.221032	DATE	0.83347	-1.23806	3	2.55392	0	-2.51132	8.34402e-05	0.000706793	no	DOWN
ETV4	non local hub	R3	Non-hub connectors	474	235	0.189063	DATE	0.754202	-0.942841	3	4.19121	0	-4.0432	0.000785186	0.00244148	no	DOWN
EWSAT1	non local hub	R2	Peripheral nodes	362	238	0.371027	DATE	0.567748	-0.916003	3	1.11135	0	-0.999363	0.000173103	0.00105059	no	DOWN
EXO1	non local hub	R4	Non-hub kinless nodes	409	157	0.219345	DATE	0.852649	-1.64064	3	0.755761	0	-0.732037	0.00702809	0.0110243	no	DOWN
F3	non local hub	R2	Peripheral nodes	298	196	0.390428	DATE	0.567407	-1.29174	3	0.647201	0	-0.715482	4.46242e-05	0.000542854	no	DOWN
FABP7	non local hub	R3	Non-hub connectors	464	272	0.157456	DATE	0.656361	-0.611835	3	2.9583	0	-2.99325	0.000357148	0.00156422	no	DOWN
FAM178B	non local hub	R2	Peripheral nodes	142	88	0.277937	DATE	0.615949	-2.25792	3	3.08495	0	-0.705498	0.0146621	0.0198674	no	DOWN
FAM72A	non local hub	R3	Non-hub connectors	444	234	0.189753	DATE	0.722243	-0.951787	3	0.962794	0	-0.940344	0.00125263	0.00330301	no	DOWN
FAM72B	non local hub	R4	Non-hub kinless nodes	433	181	0.251728	DATE	0.825264	-1.42593	3	0.84556	0	-0.868441	0.00211725	0.00460344	no	DOWN
FAM72D	non local hub	R3	Non-hub connectors	470	274	0.157026	DATE	0.660136	-0.593943	3	0.877345	0	-0.88827	0.00093396	0.00273132	no	DOWN
FAM83D	non local hub	R4	Non-hub kinless nodes	496	186	0.190376	DATE	0.859375	-1.3812	3	0.828528	0	-0.838918	4.77259e-05	0.000550336	no	DOWN
FAM86DP	non local hub	R2	Peripheral nodes	383	249	0.312168	DATE	0.57733	-0.817596	3	0.945653	0	-0.886643	1.58191e-05	0.000331078	no	DOWN
FBL	non local hub	R4	Non-hub kinless nodes	456	173	0.30694	DATE	0.856066	-1.4975	3	0.931229	0	-0.864891	0.000196521	0.00112273	no	DOWN
FCGR2A	non local hub	R2	Peripheral nodes	190	119	0.233965	DATE	0.607729	-1.98059	3	2.343	0	-0.881798	0.0156789	0.0210536	no	DOWN
FGFR4	non local hub	R2	Peripheral nodes	359	251	0.373401	DATE	0.511169	-0.799703	3	1.08681	0	-0.991065	0.000150647	0.000992738	no	DOWN
FHL1	non local hub	R4	Non-hub kinless nodes	299	133	0.34998	DATE	0.802139	-1.85534	3	1.02067	0	-0.989892	0.00856467	0.0128995	no	DOWN
FJX1	non local hub	R3	Non-hub connectors	161	93	0.341004	DATE	0.666332	-2.21319	3	0.788137	0	-0.748084	0.00100518	0.00287129	no	DOWN
FLJ46906	non local hub	R3	Non-hub connectors	369	222	0.189151	DATE	0.638046	-1.05914	3	0.956959	0	-0.848003	0.000363061	0.00157948	no	DOWN
FOS	non local hub	R3	Non-hub connectors	260	137	0.0537458	DATE	0.722352	-1.81956	3	1.95276	0	-2.10772	0.0316026	0.0385218	no	DOWN
FOSL1	non local hub	R2	Peripheral nodes	217	149	0.356764	DATE	0.528531	-1.71221	3	2.46164	0	-1.17098	0.0047204	0.00820562	no	DOWN
FOXN2	non local hub	R3	Non-hub connectors	461	256	0.098033	DATE	0.691626	-0.754973	3	0.761472	0	-0.732402	0.000123755	0.00087789	no	DOWN
FRMD5	non local hub	R3	Non-hub connectors	454	252	0.12093	DATE	0.691902	-0.790757	3	0.854928	0	-0.915175	0.00134757	0.00345394	no	DOWN
FRMD6	non local hub	R2	Peripheral nodes	350	224	0.260904	DATE	0.5904	-1.04125	3	0.786316	0	-0.739033	0.000834055	0.0025483	no	DOWN
FURIN	non local hub	R3	Non-hub connectors	378	226	0.355134	DATE	0.642535	-1.02336	3	0.946649	0	-0.821541	1.12616e-05	0.000289854	no	DOWN
G3BP1	non local hub	R4	Non-hub kinless nodes	473	193	0.196754	DATE	0.833508	-1.31858	3	1.12999	0	-1.07504	7.19193e-07	9.80236e-05	no	DOWN
G3BP2	non local hub	R3	Non-hub connectors	292	155	0.225663	DATE	0.718228	-1.65853	3	1.32227	0	-1.28881	0.000381849	0.0016264	no	DOWN
GALNT7	non local hub	R3	Non-hub connectors	479	277	0.146453	DATE	0.665583	-0.567105	3	0.854847	0	-0.940706	0.00030488	0.00144114	no	DOWN
GDF15	non local hub	R3	Non-hub connectors	468	233	0.174591	DATE	0.752132	-0.960733	3	3.91518	0	-4.05496	0.00123394	0.0032704	no	DOWN
GHR	non local hub	R3	Non-hub connectors	447	268	0.1837	DATE	0.640537	-0.64762	3	1.91635	0	-1.76036	1.74703e-05	0.000337412	no	DOWN
GJB1	non local hub	R3	Non-hub connectors	452	264	0.153485	DATE	0.658861	-0.683404	3	2.51754	0	-2.43452	0.000523683	0.00191123	no	DOWN
GJC1	non local hub	R3	Non-hub connectors	405	230	0.120673	DATE	0.677488	-0.987572	3	0.723765	0	-0.755807	0.00093952	0.00274225	no	DOWN
GNG12	non local hub	R4	Non-hub kinless nodes	515	194	0.211509	DATE	0.858098	-1.30963	3	2.3086	0	-2.30918	0.000169582	0.00103709	no	DOWN
GOLGA7B	non local hub	R4	Non-hub kinless nodes	489	204	0.217651	DATE	0.825963	-1.22017	3	2.21716	0	-2.2044	1.247e-08	3.28953e-05	no	DOWN
GOLM1	non local hub	R2	Peripheral nodes	320	199	0.226065	DATE	0.613271	-1.2649	3	1.32125	0	-0.837175	2.56191e-05	0.000412929	no	DOWN
GPAT3	non local hub	R2	Peripheral nodes	301	192	0.264867	DATE	0.593117	-1.32752	3	3.05375	0	-1.80473	7.03657e-06	0.000240221	no	DOWN
GRK5	non local hub	R2	Peripheral nodes	207	146	0.444545	DATE	0.502532	-1.73904	3	0.972747	0	-0.912517	0.00140744	0.0035482	no	DOWN
GYG2	non local hub	R3	Non-hub connectors	234	132	0.118574	DATE	0.681788	-1.86429	3	0.785545	0	-0.736211	0.0274521	0.0339679	no	DOWN
HAUS7	non local hub	R3	Non-hub connectors	448	234	0.161836	DATE	0.72718	-0.951787	3	0.861143	0	-0.854449	0.00151289	0.00371311	no	DOWN
HES1	non local hub	R4	Non-hub kinless nodes	512	181	0.232838	DATE	0.875027	-1.42593	3	2.73284	0	-2.7454	0.000174557	0.0010555	no	DOWN
HEXB	non local hub	R2	Peripheral nodes	280	175	0.232578	DATE	0.609375	-1.47961	3	1.11221	0	-0.681161	0.000483015	0.00183238	no	DOWN
HIP1	non local hub	R2	Peripheral nodes	232	161	0.369489	DATE	0.518412	-1.60485	3	2.21974	0	-1.06089	0.00158896	0.0038466	no	DOWN
HMCN1	non local hub	R2	Peripheral nodes	239	154	0.272513	DATE	0.584811	-1.66748	3	2.95302	0	-1.32997	0.000317886	0.00147148	no	DOWN
HOXA3	non local hub	R4	Non-hub kinless nodes	145	27	0.0157974	DATE	0.965327	-2.80363	3	0.785356	0	-0.70453	0.0166868	0.0222009	no	DOWN
HTN1	non local hub	R4	Non-hub kinless nodes	426	148	0.278283	DATE	0.879301	-1.72115	3	4.10203	8.33333	-4.2594	0.00373196	0.00692314	no	DOWN
HTN3	non local hub	R2	Peripheral nodes	222	162	0.423821	DATE	0.467495	-1.59591	3	1.35003	25	-1.21036	0.00424472	0.00762964	no	DOWN
ID1	non local hub	R2	Peripheral nodes	374	238	0.25462	DATE	0.595041	-0.916003	3	1.57395	0	-1.37413	1.38009e-06	0.000126049	no	DOWN
ID4	non local hub	R2	Peripheral nodes	266	179	0.327545	DATE	0.547162	-1.44382	3	2.01142	0	-1.13732	0.000487422	0.00184118	no	DOWN
IER2	non local hub	R4	Non-hub kinless nodes	409	159	0.336032	DATE	0.848871	-1.62274	3	1.81162	0	-1.78057	0.00206166	0.00454622	no	DOWN
IER5L	non local hub	R4	Non-hub kinless nodes	431	148	0.269061	DATE	0.882085	-1.72115	3	1.80144	0	-1.90169	6.22699e-06	0.000228447	no	DOWN
IFI30	non local hub	R3	Non-hub connectors	354	208	0.164735	DATE	0.654761	-1.18439	3	1.12639	0	-1.08542	0.00401531	0.00732351	no	DOWN
IFI35	non local hub	R2	Peripheral nodes	316	211	0.31432	DATE	0.554148	-1.15755	3	1.15966	0	-0.742275	8.69776e-05	0.000724715	no	DOWN
IFNGR2	non local hub	R2	Peripheral nodes	437	270	0.254073	DATE	0.618263	-0.629728	3	1.08591	0	-1.10369	5.5495e-07	9.78911e-05	no	DOWN
IFRD2	non local hub	R3	Non-hub connectors	359	173	0.247553	DATE	0.767778	-1.4975	3	0.728967	0	-0.723951	2.30859e-07	9.78911e-05	no	DOWN
IKBIP	non local hub	R3	Non-hub connectors	427	234	0.0988608	DATE	0.699686	-0.951787	3	0.967028	0	-0.960241	0.00284707	0.00567106	no	DOWN
IL1RAP	non local hub	R2	Peripheral nodes	285	185	0.286727	DATE	0.57864	-1.39015	3	2.69469	0	-1.6043	0.000389116	0.00163425	no	DOWN
IL4R	non local hub	R2	Peripheral nodes	276	191	0.353274	DATE	0.521096	-1.33647	3	1.05248	0	-0.743085	0.000279261	0.00138671	no	DOWN
IL6	non local hub	R2	Peripheral nodes	184	130	0.394403	DATE	0.500827	-1.88218	3	3.33385	0	-1.29479	0.00765873	0.0117989	no	DOWN
IL6R	non local hub	R3	Non-hub connectors	295	146	0.115107	DATE	0.755059	-1.73904	3	1.97598	0	-1.89617	0.0225647	0.0285625	no	DOWN
INPP4B	non local hub	R3	Non-hub connectors	301	160	0.0661596	DATE	0.717442	-1.6138	3	0.8838	0	-0.848504	0.019654	0.0253993	no	DOWN
INPP5F	non local hub	R2	Peripheral nodes	421	260	0.220138	DATE	0.618598	-0.719189	3	2.37567	0	-2.2857	5.6075e-07	9.78911e-05	no	DOWN
ITGA1	non local hub	R2	Peripheral nodes	272	183	0.328814	DATE	0.547348	-1.40804	3	1.12253	0	-0.692157	0.00128335	0.00334161	no	DOWN
ITGA6	non local hub	R2	Peripheral nodes	341	215	0.242052	DATE	0.602472	-1.12176	3	1.02989	0	-1.01658	0.000535351	0.00194515	no	DOWN
ITGB5	non local hub	R2	Peripheral nodes	271	181	0.318081	DATE	0.553914	-1.42593	3	1.13807	0	-0.763086	5.1415e-05	0.000570279	no	DOWN
ITIH5	non local hub	R2	Peripheral nodes	181	138	0.488607	DATE	0.418699	-1.81061	3	2.02207	0	-1.43127	0.0236637	0.0298514	no	DOWN
ITPR2	non local hub	R2	Peripheral nodes	336	210	0.369072	DATE	0.609375	-1.16649	3	1.06374	0	-0.998161	0.000133404	0.000920281	no	DOWN
ITPRIP	non local hub	R3	Non-hub connectors	495	235	0.220577	DATE	0.774615	-0.942841	3	1.67335	0	-1.66981	5.19159e-05	0.000570279	no	DOWN
KANK1	non local hub	R2	Peripheral nodes	215	132	0.212805	DATE	0.623061	-1.86429	3	1.86204	0	-0.749461	0.00604151	0.00984825	no	DOWN
KAT2A	non local hub	R3	Non-hub connectors	397	223	0.111316	DATE	0.684479	-1.05019	3	0.684025	0	-0.730478	0.00193849	0.00437539	no	DOWN
KAT2B	non local hub	R3	Non-hub connectors	245	142	0.14182	DATE	0.664073	-1.77483	3	1.98358	0	-1.11641	0.0223651	0.0283587	no	DOWN
KCNG1	non local hub	R2	Peripheral nodes	314	217	0.35127	DATE	0.522405	-1.10387	3	1.04962	0	-0.922557	0.000250082	0.00130649	no	DOWN
KIF20B	non local hub	R3	Non-hub connectors	168	82	0.117186	DATE	0.761763	-2.31159	3	0.772521	0	-0.896108	0.035506	0.0428547	no	DOWN
KLF10	non local hub	R3	Non-hub connectors	344	207	0.186769	DATE	0.637904	-1.19333	3	1.43261	0	-1.06626	0.00147459	0.00366377	no	DOWN
KLF9	non local hub	R2	Peripheral nodes	316	214	0.330925	DATE	0.54138	-1.13071	3	1.68197	0	-1.63922	0.000700681	0.00229026	no	DOWN
LAMA1	non local hub	R3	Non-hub connectors	255	155	0.19699	DATE	0.630527	-1.65853	3	1.7024	0	-0.847711	0.0121238	0.01699	no	DOWN
LAMA4	non local hub	R2	Peripheral nodes	164	111	0.349364	DATE	0.541902	-2.05216	3	2.71353	0	-0.888859	7.29817e-05	0.000665811	no	DOWN
LAMB1	non local hub	R3	Non-hub connectors	201	123	0.208467	DATE	0.625529	-1.9448	3	2.48756	0	-0.927841	0.0113107	0.0160704	no	DOWN
LAMC1	non local hub	R3	Non-hub connectors	493	285	0.167658	DATE	0.665808	-0.495536	3	0.868576	0	-0.833777	0.000234532	0.00126144	no	DOWN
LBR	non local hub	R4	Non-hub kinless nodes	442	187	0.175073	DATE	0.821006	-1.37225	3	1.0734	0	-1.09209	0.0030934	0.0060274	no	DOWN
LDHA	non local hub	R3	Non-hub connectors	444	255	0.133894	DATE	0.670152	-0.763919	3	0.898676	0	-0.921504	0.00039458	0.00163969	no	DOWN
LDLRAD3	non local hub	R3	Non-hub connectors	493	243	0.232751	DATE	0.757049	-0.871272	3	0.794468	0	-0.792498	1.22502e-05	0.000297271	no	DOWN
LDLRAD4	non local hub	R3	Non-hub connectors	315	162	0.238384	DATE	0.73551	-1.59591	3	0.711857	0	-0.697953	0.000151533	0.000993779	no	DOWN
LEF1	non local hub	R3	Non-hub connectors	109	65	0.240249	DATE	0.64439	-2.46368	3	1.44978	0	-1.44926	0.0113201	0.0160744	no	DOWN
LHFPL2	non local hub	R2	Peripheral nodes	368	236	0.28989	DATE	0.588729	-0.933895	3	0.811421	0	-0.736496	3.40644e-06	0.000177308	no	DOWN
LIF	non local hub	R2	Peripheral nodes	166	127	0.495162	DATE	0.414683	-1.90902	3	1.84885	25	-1.06792	0.0319615	0.0389014	no	DOWN
LINC00327	non local hub	R3	Non-hub connectors	415	244	0.161841	DATE	0.654313	-0.862326	3	0.881718	0	-0.792364	0.000446755	0.00176108	no	DOWN
LINC00963	non local hub	R2	Peripheral nodes	138	102	0.458077	DATE	0.453686	-2.13267	3	0.951197	0	-0.792374	0.00385277	0.00709275	no	DOWN
LRFN1	non local hub	R3	Non-hub connectors	147	66	0.435132	DATE	0.798417	-2.45473	3	0.836581	0	-0.778067	0.000357157	0.00156422	no	DOWN
LRP4	non local hub	R3	Non-hub connectors	317	151	0.20874	DATE	0.7731	-1.69431	3	1.07932	0	-1.13288	0.0108274	0.0155092	no	DOWN
LRP5	non local hub	R4	Non-hub kinless nodes	477	189	0.20845	DATE	0.843005	-1.35436	3	1.52162	0	-1.54661	3.5968e-05	0.000480401	no	DOWN
LRP8	non local hub	R4	Non-hub kinless nodes	468	190	0.249876	DATE	0.835178	-1.34542	3	1.26388	0	-1.32873	0.000278643	0.00138671	no	DOWN
LTBR	non local hub	R2	Peripheral nodes	422	262	0.22686	DATE	0.614541	-0.701296	3	0.983424	0	-0.96435	3.53463e-06	0.000177308	no	DOWN
LY6E	non local hub	R2	Peripheral nodes	197	127	0.270822	DATE	0.584401	-1.90902	3	3.07632	0	-1.16609	0.00220113	0.00473004	no	DOWN
LYN	non local hub	R2	Peripheral nodes	433	267	0.217278	DATE	0.61977	-0.656566	3	0.660277	0	-0.683519	8.23343e-06	0.000248775	no	DOWN
MAFF	non local hub	R4	Non-hub kinless nodes	507	209	0.211921	DATE	0.830067	-1.17544	3	3.21332	0	-3.26246	5.41051e-05	0.000576964	no	DOWN
MAFK	non local hub	R2	Peripheral nodes	197	143	0.41666	DATE	0.473086	-1.76588	3	0.857714	0	-0.761896	0.00033111	0.00150625	no	DOWN
MAML2	non local hub	R3	Non-hub connectors	467	243	0.221337	DATE	0.729244	-0.871272	3	1.05424	0	-1.08325	0.000131975	0.000916366	no	DOWN
MANSC1	non local hub	R2	Peripheral nodes	160	121	0.477736	DATE	0.428086	-1.9627	3	1.19405	16.6667	-0.748704	0.0409226	0.0487344	no	DOWN
MAP2K3	non local hub	R2	Peripheral nodes	200	148	0.448678	DATE	0.4524	-1.72115	3	1.10722	0	-0.949908	0.0115769	0.0163587	no	DOWN
MAPK12	non local hub	R2	Peripheral nodes	293	184	0.331403	DATE	0.605633	-1.39909	3	0.757602	0	-0.769211	0.00588564	0.00965129	no	DOWN
MB21D2	non local hub	R2	Peripheral nodes	395	242	0.204041	DATE	0.62465	-0.880218	3	0.746727	0	-0.710004	2.54475e-05	0.000412872	no	DOWN
MCM7	non local hub	R4	Non-hub kinless nodes	389	151	0.283089	DATE	0.84932	-1.69431	3	0.960703	0	-0.882283	0.00526929	0.00888334	no	DOWN
MCTP1	non local hub	R2	Peripheral nodes	424	264	0.229554	DATE	0.612318	-0.683404	3	0.95006	0	-0.982902	1.40918e-05	0.00031205	no	DOWN
METTL9	non local hub	R4	Non-hub kinless nodes	503	170	0.279125	DATE	0.885775	-1.52434	3	1.00751	0	-0.974862	3.72968e-05	0.000491625	no	DOWN
MEX3C	non local hub	R3	Non-hub connectors	456	228	0.225664	DATE	0.75	-1.00546	3	1.05546	0	-1.07156	8.47501e-08	7.64535e-05	no	DOWN
MMP15	non local hub	R2	Peripheral nodes	193	147	0.489311	DATE	0.419877	-1.7301	3	1.05361	0	-0.765656	0.0142223	0.019389	no	DOWN
MMP16	non local hub	R2	Peripheral nodes	281	188	0.315822	DATE	0.552387	-1.36331	3	1.0685	0	-1.08978	0.0022436	0.00479545	no	DOWN
MMP8	non local hub	R2	Peripheral nodes	176	119	0.336354	DATE	0.54284	-1.98059	3	2.41289	16.6667	-0.830601	0.00473802	0.00823334	no	DOWN
MOCOS	non local hub	R2	Peripheral nodes	412	257	0.232904	DATE	0.610891	-0.746027	3	1.47452	0	-1.28342	9.57227e-06	0.000271471	no	DOWN
MPP6	non local hub	R4	Non-hub kinless nodes	509	170	0.217684	DATE	0.888452	-1.52434	3	0.811385	0	-0.804412	0.00035332	0.00155691	no	DOWN
MSN	non local hub	R4	Non-hub kinless nodes	388	137	0.230958	DATE	0.875325	-1.81956	3	0.697212	0	-0.700392	0.00755748	0.0116899	no	DOWN
MUC19	non local hub	R2	Peripheral nodes	143	99	0.39204	DATE	0.52071	-2.15951	3	2.48967	0	-0.712184	0.00925223	0.0136465	no	DOWN
MUC7	non local hub	R2	Peripheral nodes	303	201	0.302888	DATE	0.559945	-1.24701	3	1.0256	25	-1.01704	0.000747769	0.00237163	no	DOWN
MYC	non local hub	R3	Non-hub connectors	413	202	0.150723	DATE	0.760777	-1.23806	3	1.93373	0	-1.91844	0.00502689	0.00860153	no	DOWN
MYOF	non local hub	R2	Peripheral nodes	168	123	0.433869	DATE	0.463967	-1.9448	3	1.51926	0	-0.709313	0.0225664	0.0285625	no	DOWN
NAF1	non local hub	R3	Non-hub connectors	413	192	0.161539	DATE	0.783876	-1.32752	3	1.1347	0	-0.99346	0.000376376	0.00161736	no	DOWN
NEDD9	non local hub	R3	Non-hub connectors	466	262	0.123932	DATE	0.683895	-0.701296	3	1.60936	0	-1.61542	0.00148514	0.0036762	no	DOWN
NES	non local hub	R2	Peripheral nodes	197	133	0.334078	DATE	0.544204	-1.85534	3	4.19134	0	-1.57596	0.000119509	0.000856426	no	DOWN
NFE2L2	non local hub	R3	Non-hub connectors	483	262	0.128804	DATE	0.705756	-0.701296	3	0.907893	0	-0.832772	0.000505419	0.00188114	no	DOWN
NFE2L3	non local hub	R2	Peripheral nodes	304	191	0.2415	DATE	0.605252	-1.33647	3	1.22636	0	-0.760744	5.35915e-05	0.000576938	no	DOWN
NFKBIZ	non local hub	R3	Non-hub connectors	357	203	0.125341	DATE	0.676663	-1.22912	3	0.972445	0	-0.867501	0.00362631	0.00678346	no	DOWN
NHP2	non local hub	R3	Non-hub connectors	441	215	0.293696	DATE	0.762316	-1.12176	3	0.823632	0	-0.821065	6.35434e-06	0.000229691	no	DOWN
NHSL1	non local hub	R3	Non-hub connectors	449	253	0.169558	DATE	0.682497	-0.781811	3	0.892832	0	-0.86509	0.00102474	0.00291867	no	DOWN
NME1	non local hub	R3	Non-hub connectors	358	216	0.187629	DATE	0.635966	-1.11282	3	1.1775	0	-1.0012	0.000318782	0.00147148	no	DOWN
NR4A1	non local hub	R3	Non-hub connectors	456	219	0.288795	DATE	0.769347	-1.08598	3	1.84245	0	-1.89075	0.000330943	0.00150625	no	DOWN
NR4A2	non local hub	R3	Non-hub connectors	482	280	0.156225	DATE	0.66254	-0.540267	3	1.37776	0	-1.35788	6.10272e-07	9.78911e-05	no	DOWN
NRROS	non local hub	R4	Non-hub kinless nodes	472	182	0.206693	DATE	0.851318	-1.41698	3	1.59177	0	-1.55477	7.30947e-07	9.80236e-05	no	DOWN
NUP35	non local hub	R4	Non-hub kinless nodes	452	139	0.210577	DATE	0.90543	-1.80167	3	1.00478	0	-1.05434	4.3278e-06	0.000202866	no	DOWN
NUP50	non local hub	R2	Peripheral nodes	307	201	0.284299	DATE	0.571338	-1.24701	3	0.858251	0	-0.812137	0.000884854	0.00264274	no	DOWN
OLIG2	non local hub	R2	Peripheral nodes	147	108	0.428163	DATE	0.460225	-2.079	3	1.30142	0	-1.2791	0.00796616	0.0121999	no	DOWN
OPHN1	non local hub	R2	Peripheral nodes	298	184	0.216868	DATE	0.618756	-1.39909	3	2.15163	0	-1.34702	0.00159603	0.00385407	no	DOWN
OR51B5	non local hub	R3	Non-hub connectors	403	240	0.177197	DATE	0.64534	-0.898111	3	0.988414	0	-0.935179	7.65034e-05	0.00068256	no	DOWN
OSBPL3	non local hub	R2	Peripheral nodes	430	264	0.212593	DATE	0.623061	-0.683404	3	1.10998	0	-1.04381	1.08033e-06	0.000115455	no	DOWN
OTUD6B	non local hub	R3	Non-hub connectors	301	146	-0.0363959	FIGHT CLUB	0.764727	-1.73904	3	0.879882	0	-0.694999	0.00147909	0.00366699	no	DOWN
PACSIN3	non local hub	R3	Non-hub connectors	262	154	0.498723	DATE	0.654507	-1.66748	3	0.856798	0	-0.893229	0.00137953	0.003505	no	DOWN
PAPSS2	non local hub	R2	Peripheral nodes	142	92	0.346498	DATE	0.580242	-2.22213	3	3.70163	0	-0.804941	4.75535e-07	9.78911e-05	no	DOWN
PARD3	non local hub	R2	Peripheral nodes	215	145	0.314211	DATE	0.54516	-1.74799	3	0.84084	0	-0.725325	0.00305713	0.00597806	no	DOWN
PARP9	non local hub	R2	Peripheral nodes	302	190	0.244391	DATE	0.604184	-1.34542	3	1.14895	0	-0.718115	6.11146e-05	0.000616919	no	DOWN
PAXIP1	non local hub	R4	Non-hub kinless nodes	319	122	0.112641	DATE	0.853736	-1.95375	3	0.740891	0	-0.759468	0.00145937	0.00364507	no	DOWN
PCOLCE2	non local hub	R3	Non-hub connectors	498	262	0.17783	DATE	0.723214	-0.701296	3	1.1033	0	-1.05169	0.000105098	0.000786396	no	DOWN
PDK4	non local hub	R4	Non-hub kinless nodes	399	168	0.291006	DATE	0.822715	-1.54223	3	1.15007	0	-1.25922	0.00446671	0.00790694	no	DOWN
PEG10	non local hub	R4	Non-hub kinless nodes	476	193	0.183256	DATE	0.8356	-1.31858	3	1.92279	0	-1.93009	0.000982979	0.00283632	no	DOWN
PFKFB4	non local hub	R4	Non-hub kinless nodes	444	155	0.223819	DATE	0.87813	-1.65853	3	2.2961	0	-2.42087	1.86502e-07	9.78911e-05	no	DOWN
PGF	non local hub	R2	Peripheral nodes	209	162	0.510707	PARTY	0.39919	-1.59591	3	1.79638	0	-1.37772	0.00896961	0.0133458	no	DOWN
PHLDA1	non local hub	R2	Peripheral nodes	424	261	0.214157	DATE	0.621078	-0.710242	3	1.46624	0	-1.33037	2.90795e-05	0.000430587	no	DOWN
PHLDA2	non local hub	R2	Peripheral nodes	421	270	0.261919	DATE	0.588696	-0.629728	3	3.30306	0	-3.19315	4.90521e-05	0.000558195	no	DOWN
PLAT	non local hub	R2	Peripheral nodes	468	288	0.225574	DATE	0.621302	-0.468698	3	1.79259	0	-1.78118	1.42418e-06	0.000127296	no	DOWN
PLCB4	non local hub	R3	Non-hub connectors	163	95	0.236064	DATE	0.660318	-2.19529	3	0.925069	0	-1.05201	0.0411662	0.0490126	no	DOWN
PLEKHG2	non local hub	R2	Peripheral nodes	252	177	0.379673	DATE	0.506661	-1.46171	3	1.40895	0	-1.27796	0.00192407	0.00435285	no	DOWN
POLD3	non local hub	R4	Non-hub kinless nodes	254	107	0.163078	DATE	0.82254	-2.08794	3	0.783018	0	-0.705053	0.0224447	0.0284523	no	DOWN
POLE	non local hub	R4	Non-hub kinless nodes	436	166	0.244613	DATE	0.855042	-1.56012	3	1.42067	0	-1.36367	0.00283082	0.00564785	no	DOWN
POLR3G	non local hub	R4	Non-hub kinless nodes	493	176	0.176232	DATE	0.872552	-1.47066	3	1.34744	0	-1.37759	0.000854888	0.00258783	no	DOWN
POP7	non local hub	R3	Non-hub connectors	351	184	0.277939	DATE	0.725197	-1.39909	3	0.702951	0	-0.70209	1.51393e-05	0.000327019	no	DOWN
POU3F2	non local hub	R4	Non-hub kinless nodes	451	150	0.222406	DATE	0.889381	-1.70326	3	1.78622	0	-1.78471	6.40174e-07	9.78911e-05	no	DOWN
PPP1R15A	non local hub	R4	Non-hub kinless nodes	393	168	0.108336	DATE	0.81726	-1.54223	3	0.903377	0	-0.916834	1.67886e-06	0.000137554	no	DOWN
PRDX4	non local hub	R3	Non-hub connectors	387	222	0.136508	DATE	0.670933	-1.05914	3	0.815397	0	-0.794627	0.00136767	0.00348903	no	DOWN
PRKAR2B	non local hub	R3	Non-hub connectors	241	146	0.195619	DATE	0.632995	-1.73904	3	1.6721	0	-0.779008	0.00856456	0.0128995	no	DOWN
PROCR	non local hub	R2	Peripheral nodes	215	148	0.357586	DATE	0.526144	-1.72115	3	2.69534	0	-1.10192	6.69823e-05	0.000640217	no	DOWN
PRPS1	non local hub	R4	Non-hub kinless nodes	493	166	0.237508	DATE	0.886624	-1.56012	3	1.043	0	-0.980412	8.64468e-06	0.000255739	no	DOWN
PRR11	non local hub	R3	Non-hub connectors	353	191	0.0950203	DATE	0.707236	-1.33647	3	0.671399	0	-0.705576	0.00813457	0.0123843	no	DOWN
PSMG3	non local hub	R2	Peripheral nodes	430	272	0.248639	DATE	0.59987	-0.611835	3	0.857424	0	-0.831386	8.1435e-05	0.000698664	no	DOWN
PSMG4	non local hub	R3	Non-hub connectors	364	196	0.263944	DATE	0.710059	-1.29174	3	0.881172	0	-0.85604	0.00218964	0.00472101	no	DOWN
PTPRD	non local hub	R2	Peripheral nodes	412	259	0.243498	DATE	0.604811	-0.728135	3	0.93068	0	-0.858051	5.73887e-05	0.000591452	no	DOWN
PTPRZ1	non local hub	R3	Non-hub connectors	486	224	0.221121	DATE	0.787566	-1.04125	3	2.19729	0	-2.18956	7.39294e-08	7.64535e-05	no	DOWN
PTTG1	non local hub	R3	Non-hub connectors	442	257	0.148329	DATE	0.661918	-0.746027	3	1.03179	0	-1.09893	0.000161257	0.00101244	no	DOWN
PUS7	non local hub	R4	Non-hub kinless nodes	470	170	0.164169	DATE	0.869172	-1.52434	3	0.945343	0	-0.980839	0.00128919	0.0033515	no	DOWN
PVR	non local hub	R2	Peripheral nodes	261	178	0.34491	DATE	0.534886	-1.45277	3	1.12541	0	-0.756435	0.00252875	0.00522654	no	DOWN
PXDC1	non local hub	R2	Peripheral nodes	159	108	0.36636	DATE	0.538626	-2.079	3	2.53119	0	-0.774581	0.000217236	0.00120534	no	DOWN
PXN	non local hub	R2	Peripheral nodes	309	198	0.274329	DATE	0.589405	-1.27385	3	0.725519	0	-0.755934	0.000629281	0.0021468	no	DOWN
QSOX2	non local hub	R4	Non-hub kinless nodes	510	175	0.232782	DATE	0.882257	-1.47961	3	0.75939	0	-0.773339	0.000291069	0.00140609	no	DOWN
RAPGEF4	non local hub	R4	Non-hub kinless nodes	453	180	0.236794	DATE	0.842112	-1.43488	3	1.06302	16.6667	-1.07672	7.57709e-07	9.80236e-05	no	DOWN
RASSF3	non local hub	R3	Non-hub connectors	423	190	0.164074	DATE	0.798244	-1.34542	3	1.63347	0	-1.611	0.00566081	0.00938251	no	DOWN
RCL1	non local hub	R3	Non-hub connectors	490	274	0.189688	DATE	0.687314	-0.593943	3	0.731293	0	-0.720928	1.76936e-06	0.000142037	no	DOWN
RCN1	non local hub	R3	Non-hub connectors	506	261	0.194128	DATE	0.73394	-0.710242	3	0.983381	0	-0.985036	2.29432e-05	0.000390272	no	DOWN
RELL1	non local hub	R3	Non-hub connectors	461	243	0.268128	DATE	0.72215	-0.871272	3	0.788278	0	-0.792314	2.71473e-05	0.000418308	no	DOWN
RHEBL1	non local hub	R3	Non-hub connectors	378	219	0.194818	DATE	0.664336	-1.08598	3	0.978813	0	-0.879173	0.00237599	0.00499634	no	DOWN
RHOJ	non local hub	R3	Non-hub connectors	429	238	0.0959345	DATE	0.692221	-0.916003	3	0.964381	0	-0.908927	0.00214156	0.00464604	no	DOWN
RIN1	non local hub	R4	Non-hub kinless nodes	310	118	0.301664	DATE	0.855109	-1.98953	3	0.720987	0	-0.731965	4.13079e-05	0.000521977	no	DOWN
RLBP1	non local hub	R2	Peripheral nodes	361	232	0.269944	DATE	0.586989	-0.969679	3	2.12652	25	-1.77195	5.39744e-05	0.000576938	no	DOWN
RNF125	non local hub	R2	Peripheral nodes	289	178	0.219552	DATE	0.620646	-1.45277	3	2.02132	0	-1.09204	9.64334e-05	0.000765859	no	DOWN
RNF182	non local hub	R2	Peripheral nodes	218	159	0.431732	DATE	0.468037	-1.62274	3	1.70496	0	-1.19349	0.00926551	0.013662	no	DOWN
RPL7	non local hub	R3	Non-hub connectors	417	201	0.26761	DATE	0.767662	-1.24701	3	0.678285	0	-0.699785	0.00011452	0.000834045	no	DOWN
RUNX3	non local hub	R3	Non-hub connectors	398	227	0.128817	DATE	0.674699	-1.01441	3	0.838917	0	-0.816237	0.00355069	0.00666738	no	DOWN
S100A11	non local hub	R2	Peripheral nodes	334	209	0.238418	DATE	0.608439	-1.17544	3	1.09317	0	-0.719172	1.87234e-05	0.000349833	no	DOWN
S100A16	non local hub	R4	Non-hub kinless nodes	491	190	0.254396	DATE	0.850258	-1.34542	3	2.52912	0	-2.5016	0.000140661	0.000955094	no	DOWN
S100B	non local hub	R2	Peripheral nodes	267	164	0.215141	DATE	0.622719	-1.57801	3	3.58444	0	-1.92544	0.00078338	0.00243826	no	DOWN
S1PR2	non local hub	R4	Non-hub kinless nodes	442	156	0.28468	DATE	0.875433	-1.64958	3	0.753634	0	-0.754542	0.000827184	0.00253539	no	DOWN
SCML4	non local hub	R2	Peripheral nodes	146	115	0.522445	PARTY	0.379574	-2.01637	3	0.827059	0	-0.741569	0.00999296	0.0145314	no	DOWN
SEH1L	non local hub	R3	Non-hub connectors	207	104	0.168255	DATE	0.747579	-2.11478	3	0.99479	0	-0.83903	0.00159619	0.00385407	no	DOWN
SEL1L3	non local hub	R2	Peripheral nodes	135	88	0.325909	DATE	0.575089	-2.25792	3	2.96868	0	-0.705472	0.0175875	0.0232073	no	DOWN
SEMA3A	non local hub	R2	Peripheral nodes	194	138	0.391211	DATE	0.493995	-1.81061	3	0.809072	0	-0.781279	0.00797589	0.0122077	no	DOWN
SEMA6B	non local hub	R2	Peripheral nodes	89	76	0.671062	PARTY	0.270799	-2.36527	3	0.80342	0	-0.724455	0.0061671	0.00998655	no	DOWN
SERPINB8	non local hub	R2	Peripheral nodes	124	85	0.340323	DATE	0.530112	-2.28476	3	1.14313	0	-1.03567	0.0186811	0.0243856	no	DOWN
SH2B3	non local hub	R4	Non-hub kinless nodes	485	185	0.209722	DATE	0.854501	-1.39015	3	2.65012	0	-2.64698	0.000778761	0.00243381	no	DOWN
SH3BP5	non local hub	R2	Peripheral nodes	204	142	0.372789	DATE	0.515475	-1.77483	3	2.00212	0	-0.910673	0.00413575	0.00746104	no	DOWN
SLC16A6	non local hub	R3	Non-hub connectors	410	213	0.0773904	DATE	0.730107	-1.13966	3	1.28564	0	-1.42083	0.00233724	0.00494445	no	DOWN
SLC1A3	non local hub	R2	Peripheral nodes	223	153	0.351433	DATE	0.529269	-1.67642	3	1.36564	0	-0.685173	0.00620816	0.0100327	no	DOWN
SLC20A1	non local hub	R2	Peripheral nodes	201	139	0.360081	DATE	0.521769	-1.80167	3	0.699783	0	-0.691831	0.00888193	0.0132676	no	DOWN
SLC23A2	non local hub	R2	Peripheral nodes	314	212	0.325426	DATE	0.54416	-1.1486	3	0.999388	0	-0.878138	0.000344965	0.0015406	no	DOWN
SLC26A2	non local hub	R2	Peripheral nodes	250	176	0.386587	DATE	0.504384	-1.47066	3	2.40501	0	-1.34631	0.00151767	0.00371557	no	DOWN
SLC27A1	non local hub	R2	Peripheral nodes	223	159	0.485505	DATE	0.491625	-1.62274	3	1.05209	0	-0.949997	0.000308265	0.00144879	no	DOWN
SLC2A3	non local hub	R2	Peripheral nodes	175	133	0.48251	DATE	0.4224	-1.85534	3	0.892256	0	-0.86073	0.0159703	0.0213633	no	DOWN
SLC39A4	non local hub	R3	Non-hub connectors	83	39	0.523037	PARTY	0.779213	-2.69628	3	0.611679	0	-0.686531	0.00252621	0.00522459	no	DOWN
SLC5A4	non local hub	R2	Peripheral nodes	264	163	0.222374	DATE	0.618787	-1.58696	3	3.27639	0	-1.71867	0.000627281	0.00214296	no	DOWN
SNHG4	non local hub	R3	Non-hub connectors	447	255	0.139252	DATE	0.674564	-0.763919	3	1.35861	0	-1.34038	0.00105508	0.00296218	no	DOWN
SNORA64	non local hub	R4	Non-hub kinless nodes	341	151	0.303925	DATE	0.803915	-1.69431	3	1.217	0	-1.19356	0.000106657	0.000794431	no	DOWN
SNORA9	non local hub	R3	Non-hub connectors	462	275	0.210565	DATE	0.645692	-0.584997	3	1.1838	0	-1.15673	0.00020502	0.0011545	no	DOWN
SNORD14C	non local hub	R4	Non-hub kinless nodes	350	139	0.136616	DATE	0.842278	-1.80167	3	1.4442	0	-1.37724	0.000738773	0.0023538	no	DOWN
SNORD15B	non local hub	R3	Non-hub connectors	249	126	0.0109794	DATE	0.74394	-1.91797	3	0.857091	0	-0.770629	0.00296577	0.00584206	no	DOWN
SNORD17	non local hub	R3	Non-hub connectors	399	217	0.104018	DATE	0.704217	-1.10387	3	1.50481	0	-1.55415	0.00514823	0.00874523	no	DOWN
SNORD50B	non local hub	R4	Non-hub kinless nodes	453	171	0.145725	DATE	0.857506	-1.51539	3	1.67525	0	-1.63264	0.000381235	0.0016264	no	DOWN
SNTB1	non local hub	R2	Peripheral nodes	306	211	0.356169	DATE	0.524531	-1.15755	3	1.10891	0	-1.04615	0.00112667	0.00308562	no	DOWN
SNX10	non local hub	R2	Peripheral nodes	229	162	0.393281	DATE	0.499552	-1.59591	3	2.39579	0	-1.42382	0.00582304	0.00957161	no	DOWN
SNX5	non local hub	R4	Non-hub kinless nodes	453	182	0.150218	DATE	0.838584	-1.41698	3	0.686562	0	-0.683735	0.00146826	0.00365466	no	DOWN
SNX9	non local hub	R3	Non-hub connectors	358	217	0.276845	DATE	0.632588	-1.10387	3	1.67397	0	-1.61097	0.000212547	0.00118871	no	DOWN
SOCS3	non local hub	R2	Peripheral nodes	234	158	0.332194	DATE	0.544086	-1.63169	3	2.46994	0	-1.05618	0.000389894	0.00163425	no	DOWN
SORBS2	non local hub	R2	Peripheral nodes	247	167	0.331234	DATE	0.542871	-1.55118	3	1.34763	0	-0.857037	0.0040729	0.0073799	no	DOWN
SOWAHC	non local hub	R3	Non-hub connectors	473	273	0.158641	DATE	0.666878	-0.602889	3	0.734639	0	-0.767191	0.000544672	0.00196883	no	DOWN
SOX8	non local hub	R3	Non-hub connectors	309	145	0.296488	DATE	0.779799	-1.74799	3	1.44259	0	-1.30423	6.18478e-05	0.000620497	no	DOWN
SPAG1	non local hub	R2	Peripheral nodes	380	240	0.247872	DATE	0.601108	-0.898111	3	1.14128	0	-0.938984	1.57461e-06	0.000133461	no	DOWN
SPATA13	non local hub	R3	Non-hub connectors	339	205	0.192897	DATE	0.634314	-1.21122	3	1.04588	0	-0.726884	0.000682171	0.00225338	no	DOWN
SPRED1	non local hub	R3	Non-hub connectors	497	279	0.157793	DATE	0.684866	-0.549213	3	0.988817	0	-0.967996	6.35113e-07	9.78911e-05	no	DOWN
SPRY1	non local hub	R3	Non-hub connectors	441	240	0.247937	DATE	0.703827	-0.898111	3	3.11051	0	-3.01678	1.82645e-06	0.000142037	no	DOWN
SPRY2	non local hub	R3	Non-hub connectors	480	289	0.18692	DATE	0.637496	-0.459752	3	3.37519	0	-3.25981	1.23717e-06	0.00011956	no	DOWN
SPRY4	non local hub	R3	Non-hub connectors	513	245	0.22964	DATE	0.771915	-0.85338	3	3.66033	0	-3.59496	2.29607e-06	0.00016125	no	DOWN
SPSB1	non local hub	R3	Non-hub connectors	357	165	0.281822	DATE	0.786385	-1.56907	3	0.844587	0	-0.887623	0.00536202	0.00900569	no	DOWN
SRSF7	non local hub	R4	Non-hub kinless nodes	469	146	0.184699	DATE	0.903092	-1.73904	3	0.867082	0	-0.883261	0.00127661	0.00333287	no	DOWN
SSH1	non local hub	R2	Peripheral nodes	221	155	0.383393	DATE	0.508098	-1.65853	3	1.80028	0	-0.855827	0.0034938	0.00659077	no	DOWN
ST3GAL1	non local hub	R2	Peripheral nodes	296	195	0.297438	DATE	0.566004	-1.30068	3	1.18556	0	-1.23647	0.000697786	0.00228231	no	DOWN
ST3GAL6	non local hub	R4	Non-hub kinless nodes	345	131	0.247849	DATE	0.85582	-1.87324	3	1.43958	0	-1.47362	0.0101232	0.0146759	no	DOWN
ST6GAL1	non local hub	R2	Peripheral nodes	264	168	0.260624	DATE	0.595041	-1.54223	3	1.81054	0	-0.979713	1.21559e-05	0.000297271	no	DOWN
ST8SIA1	non local hub	R3	Non-hub connectors	473	228	0.265571	DATE	0.767647	-1.00546	3	1.40823	0	-1.34499	4.40138e-06	0.000204124	no	DOWN
STC1	non local hub	R3	Non-hub connectors	295	168	0.308335	DATE	0.675679	-1.54223	3	1.84412	0	-1.8494	0.000272513	0.00136284	no	DOWN
STEAP1	non local hub	R3	Non-hub connectors	350	194	0.0958242	DATE	0.692767	-1.30963	3	0.685072	0	-0.68955	0.00434853	0.00775386	no	DOWN
STEAP3	non local hub	R2	Peripheral nodes	278	186	0.323146	DATE	0.552352	-1.3812	3	1.21781	0	-0.742765	0.000382805	0.0016264	no	DOWN
STK10	non local hub	R3	Non-hub connectors	481	277	0.15105	DATE	0.668358	-0.567105	3	1.07992	0	-1.05303	0.000931918	0.00272859	no	DOWN
STK17A	non local hub	R2	Peripheral nodes	175	130	0.456304	DATE	0.448163	-1.88218	3	1.22415	0	-1.2259	0.000814618	0.00251076	no	DOWN
STMN3	non local hub	R3	Non-hub connectors	319	180	0.117063	DATE	0.681607	-1.43488	3	0.891038	0	-0.769026	0.00833279	0.0126315	no	DOWN
STOM	non local hub	R2	Peripheral nodes	365	228	0.234461	DATE	0.609803	-1.00546	3	1.16342	0	-0.869269	4.80832e-06	0.000214888	no	DOWN
STON2	non local hub	R4	Non-hub kinless nodes	434	190	0.213604	DATE	0.808342	-1.34542	3	1.13985	0	-1.18455	2.65376e-06	0.000168185	no	DOWN
SVIL	non local hub	R2	Peripheral nodes	141	99	0.411187	DATE	0.507017	-2.15951	3	2.64525	0	-0.743492	0.0157749	0.0211652	no	DOWN
SWAP70	non local hub	R3	Non-hub connectors	493	283	0.159314	DATE	0.670482	-0.513428	3	1.35968	0	-1.41209	0.000189858	0.00110455	no	DOWN
SYNGR2	non local hub	R2	Peripheral nodes	308	202	0.298834	DATE	0.569868	-1.23806	3	1.43946	0	-0.88879	0.00026222	0.00133445	no	DOWN
SYNJ2	non local hub	R4	Non-hub kinless nodes	441	178	0.236108	DATE	0.837084	-1.45277	3	0.814189	0	-0.825649	9.33118e-08	7.64535e-05	no	DOWN
TAF1C	non local hub	R2	Peripheral nodes	449	278	0.22214	DATE	0.616649	-0.558159	3	0.76673	0	-0.790499	2.61431e-05	0.000414187	no	DOWN
TANC1	non local hub	R3	Non-hub connectors	454	267	0.161771	DATE	0.654132	-0.656566	3	0.833227	0	-0.787048	0.00041312	0.00168211	no	DOWN
TANC2	non local hub	R2	Peripheral nodes	352	226	0.269854	DATE	0.587778	-1.02336	3	1.00401	0	-0.751121	0.000139041	0.000949344	no	DOWN
TATDN1	non local hub	R3	Non-hub connectors	311	168	0.0711664	DATE	0.708192	-1.54223	3	0.880716	0	-0.84483	0.0137469	0.0188718	no	DOWN
TBC1D8	non local hub	R2	Peripheral nodes	406	257	0.247637	DATE	0.599305	-0.746027	3	0.779182	0	-0.764996	0.000235861	0.0012672	no	DOWN
TCF7L2	non local hub	R3	Non-hub connectors	457	273	0.177785	DATE	0.643144	-0.602889	3	0.800768	0	-0.773009	1.16053e-05	0.000292574	no	DOWN
TENM3	non local hub	R2	Peripheral nodes	309	212	0.358759	DATE	0.529289	-1.1486	3	1.0706	0	-0.914133	0.000289977	0.00140609	no	DOWN
TEX15	non local hub	R2	Peripheral nodes	204	138	0.334867	DATE	0.542388	-1.81061	3	1.916	0	-0.732374	0.000390944	0.00163425	no	DOWN
TGFBR1	non local hub	R2	Peripheral nodes	345	219	0.256307	DATE	0.597051	-1.08598	3	1.05105	0	-0.814537	1.87578e-05	0.000349833	no	DOWN
TGIF1	non local hub	R3	Non-hub connectors	492	290	0.199694	DATE	0.652571	-0.450806	3	1.45619	0	-1.41208	3.92279e-05	0.000508465	no	DOWN
TIMP1	non local hub	R2	Peripheral nodes	245	155	0.251395	DATE	0.59975	-1.65853	3	2.95888	0	-1.36626	0.000283217	0.00139384	no	DOWN
TLCD1	non local hub	R4	Non-hub kinless nodes	412	175	0.314642	DATE	0.819581	-1.47961	3	1.48702	0	-1.47564	1.92994e-05	0.000350877	no	DOWN
TM4SF1	non local hub	R2	Peripheral nodes	123	86	0.434865	DATE	0.511138	-2.27581	3	4.16841	25	-0.835542	0.04122	0.0490629	no	DOWN
TMC6	non local hub	R2	Peripheral nodes	396	257	0.282271	DATE	0.578812	-0.746027	3	1.36187	0	-1.31977	3.9486e-05	0.000508465	no	DOWN
TMEM67	non local hub	R2	Peripheral nodes	177	127	0.412473	DATE	0.485173	-1.90902	3	1.91681	0	-0.720079	0.00234515	0.00495434	no	DOWN
TMX4	non local hub	R4	Non-hub kinless nodes	518	169	0.257037	DATE	0.893558	-1.53328	3	1.5994	0	-1.5376	2.70864e-05	0.000418308	no	DOWN
TNFAIP3	non local hub	R3	Non-hub connectors	304	153	0.153994	DATE	0.7467	-1.67642	3	1.75443	0	-1.85592	0.0161564	0.0215793	no	DOWN
TNFAIP8L1	non local hub	R2	Peripheral nodes	379	250	0.306124	DATE	0.564887	-0.80865	3	0.727677	0	-0.720234	0.000557252	0.00198848	no	DOWN
TNFRSF12A	non local hub	R2	Peripheral nodes	290	198	0.335954	DATE	0.533841	-1.27385	3	1.26868	0	-1.29287	0.000797138	0.00246461	no	DOWN
TNFRSF19	non local hub	R3	Non-hub connectors	449	230	0.269905	DATE	0.737601	-0.987572	3	1.64223	0	-1.54576	1.17751e-06	0.00011956	no	DOWN
TNRC18	non local hub	R2	Peripheral nodes	282	176	0.235636	DATE	0.610482	-1.47066	3	1.30249	0	-0.715591	1.92307e-05	0.000350877	no	DOWN
TONSL	non local hub	R3	Non-hub connectors	208	121	0.157118	DATE	0.661589	-1.9627	3	0.764502	0	-0.734285	0.0201539	0.0259634	no	DOWN
TPD52	non local hub	R2	Peripheral nodes	316	215	0.337505	DATE	0.537083	-1.12176	3	0.707477	0	-0.683229	0.000988242	0.00284303	no	DOWN
TPST1	non local hub	R2	Peripheral nodes	242	173	0.405716	DATE	0.488952	-1.4975	3	1.23566	0	-0.711573	0.0019285	0.00435886	no	DOWN
TRAF3	non local hub	R2	Peripheral nodes	328	206	0.252575	DATE	0.605555	-1.20228	3	0.576842	0	-0.716969	0.000581941	0.00204344	no	DOWN
TRAF3IP2	non local hub	R3	Non-hub connectors	496	278	0.205156	DATE	0.685858	-0.558159	3	1.10324	0	-1.09666	6.36847e-05	0.000623656	no	DOWN
TRIB1	non local hub	R2	Peripheral nodes	288	188	0.286153	DATE	0.573881	-1.36331	3	0.71835	0	-0.697463	0.00177768	0.00413234	no	DOWN
TRIM51	non local hub	R3	Non-hub connectors	478	287	0.182578	DATE	0.639498	-0.477644	3	1.40968	25	-1.26403	2.83458e-06	0.000168185	no	DOWN
TRIM65	non local hub	R3	Non-hub connectors	495	258	0.17973	DATE	0.728338	-0.737081	3	1.21081	0	-1.11243	0.000256159	0.00131862	no	DOWN
TSPAN13	non local hub	R2	Peripheral nodes	423	267	0.267731	DATE	0.601579	-0.656566	3	0.963606	0	-0.929827	5.16941e-05	0.000570279	no	DOWN
TUBA1B	non local hub	R3	Non-hub connectors	482	260	0.120496	DATE	0.709027	-0.719189	3	0.815487	0	-0.749431	0.000407109	0.00166779	no	DOWN
TUSC3	non local hub	R3	Non-hub connectors	397	228	0.136457	DATE	0.670171	-1.00546	3	0.9974	0	-0.903105	0.00116484	0.0031575	no	DOWN
TXN	non local hub	R3	Non-hub connectors	330	174	0.0413585	DATE	0.721983	-1.48855	3	0.962092	0	-0.729558	0.00623561	0.0100704	no	DOWN
TYRO3	non local hub	R2	Peripheral nodes	345	216	0.235327	DATE	0.608015	-1.11282	3	1.0494	0	-0.762179	0.00120701	0.00323536	no	DOWN
UBALD2	non local hub	R2	Peripheral nodes	458	281	0.211181	DATE	0.623572	-0.53132	3	1.40179	0	-1.34059	5.00546e-06	0.000219014	no	DOWN
UBASH3B	non local hub	R2	Peripheral nodes	137	108	0.530511	PARTY	0.37855	-2.079	3	1.16248	0	-1.1906	0.0243764	0.0306247	no	DOWN
UPP1	non local hub	R3	Non-hub connectors	349	208	0.176664	DATE	0.644798	-1.18439	3	0.965667	0	-0.758939	0.000703664	0.00229391	no	DOWN
UXS1	non local hub	R2	Peripheral nodes	232	150	0.277866	DATE	0.581971	-1.70326	3	0.902381	0	-0.87069	0.00468431	0.00816889	no	DOWN
VGF	non local hub	R2	Peripheral nodes	306	192	0.242312	DATE	0.606305	-1.32752	3	5.35603	0	-3.14591	1.35937e-05	0.000306544	no	DOWN
VKORC1L1	non local hub	R3	Non-hub connectors	449	269	0.183959	DATE	0.641068	-0.638674	3	0.87805	0	-0.871097	1.87804e-06	0.000142037	no	DOWN
VLDLR	non local hub	R2	Peripheral nodes	109	87	0.528837	PARTY	0.362932	-2.26686	3	1.11867	0	-0.732496	0.00437391	0.00778499	no	DOWN
WDFY2	non local hub	R3	Non-hub connectors	143	84	0.454184	DATE	0.654946	-2.2937	3	0.773913	0	-0.691903	0.0077328	0.0118944	no	DOWN
WDR43	non local hub	R4	Non-hub kinless nodes	467	176	0.120219	DATE	0.857966	-1.47066	3	0.755746	0	-0.75415	0.000102528	0.000782961	no	DOWN
WEE1	non local hub	R3	Non-hub connectors	334	158	0.0828828	DATE	0.77622	-1.63169	3	0.795771	0	-0.84937	0.0131067	0.0181245	no	DOWN
WFDC1	non local hub	R2	Peripheral nodes	149	109	0.438737	DATE	0.464844	-2.07005	3	4.72754	25	-1.47995	0.0240617	0.0302835	no	DOWN
WWTR1	non local hub	R2	Peripheral nodes	150	104	0.356365	DATE	0.519289	-2.11478	3	1.00816	0	-0.999486	0.00977413	0.0142708	no	DOWN
XRCC2	non local hub	R3	Non-hub connectors	348	182	0.10789	DATE	0.726483	-1.41698	3	0.947945	0	-0.907638	0.0103939	0.0150196	no	DOWN
YBX3	non local hub	R3	Non-hub connectors	487	220	0.189702	DATE	0.795926	-1.07703	3	1.124	0	-1.08781	0.000429707	0.00171743	no	DOWN
ZDHHC20	non local hub	R2	Peripheral nodes	387	243	0.23415	DATE	0.605733	-0.871272	3	0.732958	0	-0.747985	0.000184999	0.00108535	no	DOWN
ZFP36	non local hub	R2	Peripheral nodes	340	222	0.282093	DATE	0.573668	-1.05914	3	1.02054	0	-0.966079	0.000335063	0.0015084	no	DOWN
ZFPM2-AS1	non local hub	R2	Peripheral nodes	289	186	0.410853	DATE	0.585781	-1.3812	3	0.850055	0	-0.760579	7.47407e-05	0.000673489	no	DOWN
ZMIZ1	non local hub	R3	Non-hub connectors	468	222	0.250897	DATE	0.774984	-1.05914	3	1.00994	0	-1.00468	4.67924e-05	0.000546669	no	DOWN
ZMYND8	non local hub	R4	Non-hub kinless nodes	524	179	0.24517	DATE	0.883307	-1.44382	3	0.996371	0	-0.976539	0.000102194	0.000782961	no	DOWN
ZNF608	non local hub	R3	Non-hub connectors	274	151	0.143427	DATE	0.696294	-1.69431	3	0.796152	0	-0.788591	0.0209878	0.0268898	no	DOWN
ZNF703	non local hub	R3	Non-hub connectors	494	279	0.184063	DATE	0.681027	-0.549213	3	1.81089	0	-1.70133	0.000112178	0.000821858	no	DOWN
